# Supplementary material for: Breast cancer clinical outcomes and tumor immune microenvironment: cross-dialogue of multiple epigenetic modification profiles
Source: Aging (Albany NY). 2024 May 22;16(10):8998–9022. doi: 10.18632/aging.205853 (PMC11164499; doi:10.18632/aging.205853)
Supplement: Supplementary Table 1 [file aging-16-205853-s001.xlsx]

## Sheet: Sheet1
Supplementary Table 1. The list of MRGs.
Gene	Type
METTL3	m1A/m6A/m5C
METTL14	m1A/m6A/m5C
METTL16	m1A/m6A/m5C
WTAP	m1A/m6A/m5C
KIAA1429	m1A/m6A/m5C
VIRMA	m1A/m6A/m5C
RBM1	m1A/m6A/m5C
RBM15	m1A/m6A/m5C
RBM15B	m1A/m6A/m5C
ZC3H13	m1A/m6A/m5C
FTO	m1A/m6A/m5C
ALKBH5	m1A/m6A/m5C
YTHDC1	m1A/m6A/m5C
YTHDC2	m1A/m6A/m5C
YTHDF1	m1A/m6A/m5C
YTHDF2	m1A/m6A/m5C
YTHDF3	m1A/m6A/m5C
IGF2BP1	m1A/m6A/m5C
IGF2BP2,	m1A/m6A/m5C
IGF2BP3	m1A/m6A/m5C
HNRNPA2B1	m1A/m6A/m5C
HNRNPC	m1A/m6A/m5C
HNRNPG	m1A/m6A/m5C
RBMX	m1A/m6A/m5C
LRPPRC	m1A/m6A/m5C
FMR1	m1A/m6A/m5C
CBLL1	m1A/m6A/m5C
IGFBP1	m1A/m6A/m5C
IGFBP2	m1A/m6A/m5C
IGFBP3	m1A/m6A/m5C
ELAVL1	m1A/m6A/m5C
TRMT6	m1A/m6A/m5C
TRMT61A	m1A/m6A/m5C
TRMT61B	m1A/m6A/m5C
TRMT61C	m1A/m6A/m5C
TRMT10C	m1A/m6A/m5C
BMT2	m1A/m6A/m5C
RRP8	m1A/m6A/m5C
ALKBH1	m1A/m6A/m5C
ALKBH3	m1A/m6A/m5C
NOP2	m1A/m6A/m5C
NSUN1	m1A/m6A/m5C
NSUN2	m1A/m6A/m5C
NSUN3	m1A/m6A/m5C
NSUN4	m1A/m6A/m5C
NSUN5	m1A/m6A/m5C
NSUN7	m1A/m6A/m5C
DNMT1	m1A/m6A/m5C
TRDMT1	m1A/m6A/m5C
DNMT3A	m1A/m6A/m5C
DNMT3B	m1A/m6A/m5C
TET2	m1A/m6A/m5C
YBX1	m1A/m6A/m5C
ALYREF	m1A/m6A/m5C
NSUN6	m1A/m6A/m5C
TET1	m1A/m6A/m5C
TET3	m1A/m6A/m5C
