# Supplementary material for: Breast cancer clinical outcomes and tumor immune microenvironment: cross-dialogue of multiple epigenetic modification profiles
Source: Aging (Albany NY). 2024 May 22;16(10):8998–9022. doi: 10.18632/aging.205853 (PMC11164499; doi:10.18632/aging.205853)
Supplement: Supplementary Table 2 [file aging-16-205853-s002.xlsx]

## Sheet: Sheet1
Supplementary Table 2. The details of GSVA analysis.
id	logFC	AveExpr	t	P.Value	adj.P.Val	B
KEGG_OLFACTORY_TRANSDUCTION	0.374072	0.0722961	26.8527	1.64473e-121	3.05919e-119	266.721
KEGG_UBIQUITIN_MEDIATED_PROTEOLYSIS	-0.287457	-0.0206308	-25.1359	1.13114e-109	1.05196e-107	239.554
KEGG_ARACHIDONIC_ACID_METABOLISM	0.278722	0.01048	21.7289	7.74282e-87	4.80055e-85	187.155
KEGG_NEUROACTIVE_LIGAND_RECEPTOR_INTERACTION	0.234922	0.0313642	20.9954	4.48496e-82	2.08551e-80	176.229
KEGG_METABOLISM_OF_XENOBIOTICS_BY_CYTOCHROME_P450	0.288385	0.0223494	20.8304	5.18136e-81	1.92747e-79	173.791
KEGG_ENDOMETRIAL_CANCER	-0.228415	-0.00308237	-20.2513	2.59895e-77	8.05675e-76	165.302
KEGG_LYSINE_DEGRADATION	-0.25508	-0.0212694	-20.0792	3.20655e-76	8.52027e-75	162.799
KEGG_MATURITY_ONSET_DIABETES_OF_THE_YOUNG	0.289881	0.055494	19.8999	4.34832e-75	1.01099e-73	160.202
KEGG_STEROID_HORMONE_BIOSYNTHESIS	0.263208	0.0355006	19.5354	8.42981e-73	1.74216e-71	154.956
KEGG_RETINOL_METABOLISM	0.258416	0.0371444	19.4513	2.82323e-72	5.25121e-71	153.752
KEGG_CHRONIC_MYELOID_LEUKEMIA	-0.213731	-0.00884654	-19.1741	1.49369e-70	2.52569e-69	149.799
KEGG_INOSITOL_PHOSPHATE_METABOLISM	-0.217702	-0.0124174	-18.6458	2.65728e-67	4.11879e-66	142.346
KEGG_COLORECTAL_CANCER	-0.193522	-0.00817748	-18.1273	3.72222e-64	5.32563e-63	135.132
KEGG_DRUG_METABOLISM_CYTOCHROME_P450	0.249533	0.0257837	18.1055	5.03632e-64	6.69111e-63	134.831
KEGG_NON_HOMOLOGOUS_END_JOINING	-0.312916	-0.017143	-17.7178	1.05381e-61	1.30673e-60	129.511
KEGG_CARDIAC_MUSCLE_CONTRACTION	0.241995	-0.00581961	17.612	4.47689e-61	5.20439e-60	128.07
KEGG_RNA_DEGRADATION	-0.278496	-0.0292108	-17.5131	1.72558e-60	1.88799e-59	126.727
KEGG_LINOLEIC_ACID_METABOLISM	0.25147	0.0136815	16.7526	4.78713e-56	4.9467e-55	116.543
KEGG_AUTOIMMUNE_THYROID_DISEASE	0.383654	0.00847098	16.2646	2.96287e-53	2.90049e-52	110.146
KEGG_BASAL_TRANSCRIPTION_FACTORS	-0.234782	-0.0223062	-16.1668	1.05974e-52	9.85561e-52	108.878
KEGG_DRUG_METABOLISM_OTHER_ENZYMES	0.187985	0.0266942	16.09	2.87509e-52	2.54651e-51	107.885
KEGG_INSULIN_SIGNALING_PATHWAY	-0.136729	-0.00758823	-15.9511	1.73428e-51	1.46625e-50	106.097
KEGG_SYSTEMIC_LUPUS_ERYTHEMATOSUS	0.292194	-0.0045803	15.8598	5.62597e-51	4.54969e-50	104.926
KEGG_PROSTATE_CANCER	-0.162682	-0.00884322	-15.769	1.80489e-50	1.39879e-49	103.766
KEGG_CYTOKINE_CYTOKINE_RECEPTOR_INTERACTION	0.26921	0.00327018	15.1092	7.60341e-47	5.65694e-46	95.4645
KEGG_RENAL_CELL_CARCINOMA	-0.177604	-0.0078296	-14.9441	5.92422e-46	4.23809e-45	93.4227
KEGG_GLYCOSYLPHOSPHATIDYLINOSITOL_GPI_ANCHOR_BIOSYNTHESIS	-0.288125	-0.0235602	-14.9137	8.63315e-46	5.94728e-45	93.0482
KEGG_ENDOCYTOSIS	-0.133799	-0.0128425	-14.7297	8.33784e-45	5.53871e-44	90.7931
KEGG_PHENYLALANINE_METABOLISM	0.230013	-0.0027631	14.6596	1.9696e-44	1.26326e-43	89.9384
KEGG_NEUROTROPHIN_SIGNALING_PATHWAY	-0.142925	-0.0109665	-14.648	2.26862e-44	1.40654e-43	89.7978
KEGG_ASTHMA	0.362936	0.000470342	14.4736	1.89937e-43	1.13962e-42	87.6851
KEGG_VASOPRESSIN_REGULATED_WATER_REABSORPTION	-0.177958	0.00135139	-14.299	1.56733e-42	9.1101e-42	85.5869
KEGG_COMPLEMENT_AND_COAGULATION_CASCADES	0.234981	0.0196697	14.0441	3.30923e-41	1.8652e-40	82.5552
KEGG_NUCLEOTIDE_EXCISION_REPAIR	-0.242793	-0.0292193	-14.0224	4.28531e-41	2.34432e-40	82.2983
KEGG_INTESTINAL_IMMUNE_NETWORK_FOR_IGA_PRODUCTION	0.352515	-0.0165221	13.93	1.28225e-40	6.81425e-40	81.209
KEGG_SMALL_CELL_LUNG_CANCER	-0.157841	-0.0117257	-13.9189	1.46206e-40	7.55396e-40	81.0786
KEGG_TYPE_I_DIABETES_MELLITUS	0.356071	-0.00995817	13.8337	3.99507e-40	2.00833e-39	80.0795
KEGG_THYROID_CANCER	-0.156455	-0.0172401	-13.787	6.91212e-40	3.3833e-39	79.5347
KEGG_MTOR_SIGNALING_PATHWAY	-0.147866	-0.00909211	-13.7339	1.28953e-39	6.15007e-39	78.915
KEGG_GRAFT_VERSUS_HOST_DISEASE	0.399701	-0.0212918	13.6248	4.61132e-39	2.14426e-38	77.6488
KEGG_GLUTATHIONE_METABOLISM	0.194683	-0.0225522	13.4087	5.64241e-38	2.55367e-37	75.1605
KEGG_ALLOGRAFT_REJECTION	0.393921	-0.0195944	13.4068	5.76636e-38	2.55367e-37	75.1389
KEGG_AMINOACYL_TRNA_BIOSYNTHESIS	-0.260444	-0.0309786	-13.1776	7.95775e-37	3.44219e-36	72.5315
KEGG_ADHERENS_JUNCTION	-0.178873	-0.00441569	-13.1323	1.33171e-36	5.62952e-36	72.0201
KEGG_PHOSPHATIDYLINOSITOL_SIGNALING_SYSTEM	-0.153966	-0.00716927	-12.7598	8.76124e-35	3.62131e-34	67.8624
KEGG_PRION_DISEASES	0.180076	-0.00358134	12.7073	1.56963e-34	6.34678e-34	67.2834
KEGG_ALPHA_LINOLENIC_ACID_METABOLISM	0.179426	0.0099902	12.6564	2.75878e-34	1.09177e-33	66.7234
KEGG_ERBB_SIGNALING_PATHWAY	-0.129471	-0.0117677	-12.4013	4.53707e-33	1.75811e-32	63.9436
KEGG_HEMATOPOIETIC_CELL_LINEAGE	0.258554	0.00241611	12.3699	6.38463e-33	2.42355e-32	63.6045
KEGG_PENTOSE_AND_GLUCURONATE_INTERCONVERSIONS	0.202583	0.0369555	12.0518	1.96397e-31	7.30598e-31	60.2042
KEGG_CIRCADIAN_RHYTHM_MAMMAL	-0.250788	-0.00714245	-12.0029	3.30821e-31	1.20652e-30	59.6868
KEGG_PANCREATIC_CANCER	-0.139736	-0.0127345	-11.9973	3.50954e-31	1.25534e-30	59.6281
KEGG_PRIMARY_IMMUNODEFICIENCY	0.31879	-0.0223996	11.9618	5.11743e-31	1.79593e-30	59.2539
KEGG_GLYCOSPHINGOLIPID_BIOSYNTHESIS_LACTO_AND_NEOLACTO_SERIES	0.197511	-0.0173478	11.744	5.07531e-30	1.74816e-29	56.9778
KEGG_VALINE_LEUCINE_AND_ISOLEUCINE_BIOSYNTHESIS	-0.2469	-0.0102682	-11.7094	7.28634e-30	2.46411e-29	56.6191
KEGG_ANTIGEN_PROCESSING_AND_PRESENTATION	0.239584	-0.00926507	11.6127	1.99398e-29	6.62286e-29	55.6206
KEGG_OXIDATIVE_PHOSPHORYLATION	0.235327	-0.0335574	11.4137	1.55082e-28	5.06058e-28	53.5864
KEGG_SELENOAMINO_ACID_METABOLISM	-0.160181	-0.0279339	-11.3514	2.92897e-28	9.39289e-28	52.9559
KEGG_PROPANOATE_METABOLISM	-0.192527	-0.0199011	-11.3265	3.77655e-28	1.19057e-27	52.704
KEGG_PPAR_SIGNALING_PATHWAY	0.139229	-0.000595184	11.2525	8.00489e-28	2.48152e-27	51.9592
KEGG_PRIMARY_BILE_ACID_BIOSYNTHESIS	0.172975	0.00229813	11.242	8.9014e-28	2.7142e-27	51.8539
KEGG_PARKINSONS_DISEASE	0.215599	-0.0308766	11.1661	1.91536e-27	5.74608e-27	51.0943
KEGG_CELL_ADHESION_MOLECULES_CAMS	0.21139	0.000708467	11.0632	5.3758e-27	1.58714e-26	50.0715
KEGG_ASCORBATE_AND_ALDARATE_METABOLISM	0.193215	0.0505999	11.0155	8.65423e-27	2.51513e-26	49.5996
KEGG_TYROSINE_METABOLISM	0.15006	0.00625457	10.8654	3.82805e-26	1.09541e-25	48.1262
KEGG_VALINE_LEUCINE_AND_ISOLEUCINE_DEGRADATION	-0.180393	-0.0201401	-10.8493	4.48698e-26	1.26451e-25	47.9688
KEGG_TRYPTOPHAN_METABOLISM	0.142721	-0.00693583	10.5724	6.66518e-25	1.85033e-24	45.2959
KEGG_NATURAL_KILLER_CELL_MEDIATED_CYTOTOXICITY	0.181275	-0.00738681	10.3922	3.74527e-24	1.02444e-23	43.5866
KEGG_PROGESTERONE_MEDIATED_OOCYTE_MATURATION	-0.113388	-0.0170448	-10.2987	9.08051e-24	2.44779e-23	42.7098
KEGG_SNARE_INTERACTIONS_IN_VESICULAR_TRANSPORT	-0.13141	-0.0163514	-10.1673	3.12392e-23	8.30071e-23	41.4868
KEGG_N_GLYCAN_BIOSYNTHESIS	-0.154742	-0.026379	-10.0018	1.45315e-22	3.80684e-22	39.9657
KEGG_GLYCINE_SERINE_AND_THREONINE_METABOLISM	0.128322	-0.0137094	9.947	2.4056e-22	6.21447e-22	39.467
KEGG_ALZHEIMERS_DISEASE	0.143287	-0.0273481	9.91476	3.23368e-22	8.23924e-22	39.1743
KEGG_TASTE_TRANSDUCTION	0.131058	0.0292251	9.88361	4.29976e-22	1.08075e-21	38.8925
KEGG_SPLICEOSOME	-0.178512	-0.0306845	-9.70743	2.12602e-21	5.27253e-21	37.3118
KEGG_RIBOSOME	0.295441	-0.0254388	9.66241	3.18654e-21	7.79865e-21	36.9116
KEGG_CALCIUM_SIGNALING_PATHWAY	0.107819	0.0114923	9.59861	5.63916e-21	1.36219e-20	36.3473
KEGG_FOLATE_BIOSYNTHESIS	0.176464	-0.00545497	9.40154	3.22421e-20	7.68849e-20	34.624
KEGG_ARGININE_AND_PROLINE_METABOLISM	0.101319	-0.0183413	9.30716	7.3532e-20	1.73126e-19	33.8093
KEGG_VIRAL_MYOCARDITIS	0.182361	0.000755743	9.19531	1.93607e-19	4.50135e-19	32.853
KEGG_MISMATCH_REPAIR	-0.216771	-0.0367343	-9.15165	2.81774e-19	6.47037e-19	32.4824
KEGG_STARCH_AND_SUCROSE_METABOLISM	0.120666	0.0345925	9.13238	3.32369e-19	7.5391e-19	32.3193
KEGG_OOCYTE_MEIOSIS	-0.108571	-0.0186393	-8.45622	9.08014e-17	2.03483e-16	26.7837
KEGG_HISTIDINE_METABOLISM	0.102648	-0.00885277	8.40387	1.38083e-16	3.05756e-16	26.3706
KEGG_TGF_BETA_SIGNALING_PATHWAY	-0.11765	-0.000756894	-8.37915	1.68175e-16	3.68006e-16	26.1763
KEGG_CYTOSOLIC_DNA_SENSING_PATHWAY	0.115406	0.00344288	8.14869	1.03209e-15	2.23219e-15	24.3889
KEGG_SULFUR_METABOLISM	0.12812	-0.00631063	8.00325	3.17183e-15	6.48308e-15	23.2836
KEGG_CHEMOKINE_SIGNALING_PATHWAY	0.124948	-0.00843202	7.94425	4.97705e-15	1.00623e-14	22.8402
KEGG_PROXIMAL_TUBULE_BICARBONATE_RECLAMATION	0.110988	-0.00261984	7.86829	8.85188e-15	1.77038e-14	22.2737
KEGG_LEISHMANIA_INFECTION	0.163395	-0.0108276	7.4886	1.46529e-13	2.8994e-13	19.5147
KEGG_PORPHYRIN_AND_CHLOROPHYLL_METABOLISM	0.114635	0.020019	7.3349	4.41054e-13	8.63537e-13	18.4327
KEGG_ONE_CARBON_POOL_BY_FOLATE	-0.124176	-0.0314157	-7.01843	4.00467e-12	7.67906e-12	16.269
KEGG_TAURINE_AND_HYPOTAURINE_METABOLISM	0.118782	0.0105623	6.73659	2.65872e-11	4.99516e-11	14.4152
KEGG_HUNTINGTONS_DISEASE	0.10427	-0.0267553	6.59765	6.5924e-11	1.22619e-10	13.527
KEGG_PROTEIN_EXPORT	-0.137455	-0.0322219	-6.15821	1.04374e-09	1.8489e-09	10.8305
KEGG_CELL_CYCLE	-0.116127	-0.0303824	-6.13302	1.21657e-09	2.13474e-09	10.6812
KEGG_CITRATE_CYCLE_TCA_CYCLE	-0.112716	-0.0254052	-5.57607	3.12305e-08	5.1406e-08	7.52568
KEGG_BASE_EXCISION_REPAIR	-0.111601	-0.0314459	-5.48661	5.12714e-08	8.36533e-08	7.04513
KEGG_PROTEASOME	0.126305	-0.0314264	5.04839	5.24398e-07	8.40845e-07	4.79778
