# Supplementary material for: Breast cancer clinical outcomes and tumor immune microenvironment: cross-dialogue of multiple epigenetic modification profiles
Source: Aging (Albany NY). 2024 May 22;16(10):8998–9022. doi: 10.18632/aging.205853 (PMC11164499; doi:10.18632/aging.205853)
Supplement: Supplementary Table 3 [file aging-16-205853-s003.xlsx]

## Sheet: Sheet1
Supplementary Table 3. The details of GO analysis.
ONTOLOGY	ID	Description	GeneRatio	BgRatio	pvalue	p.adjust	qvalue	geneID	Count
BP	GO:0048193	Golgi vesicle transport	126/3781	296/18723	1.02901e-18	6.35926e-15	5.16344e-15	CUL3/PREPL/SEC24B/TRAPPC8/TRAPPC11/ANKFY1/CNST/EXOC1/RBSN/COPG2/EXOC5/TRIP11/VPS52/RAB14/GCC2/GOSR1/ARFGEF2/AP1AR/SEC24C/SCAMP1/KLHL12/TBC1D14/COPB1/MON2/NBAS/SEC23IP/KLHL20/EXOC4/EXOC6B/TRAPPC6B/COG5/PPP6C/AP1G1/PRKCI/SEC22C/SPAST/RINT1/COG2/STX17/GOLGA4/CCDC91/RAB33B/RABEP1/SNAP23/TRAPPC10/VPS13A/SEC24A/MACF1/EXOC8/GBF1/LMAN1/TMED7/DOP1A/COG6/HTT/EXOC6/YIPF5/ATP9A/ATP2C1/SNX2/EPS15/BBS2/USO1/BL…	126
BP	GO:0006892	post-Golgi vesicle-mediated transport	61/3781	104/18723	7.96891e-18	2.46239e-14	1.99936e-14	PREPL/ANKFY1/CNST/EXOC1/RBSN/EXOC5/VPS52/RAB14/ARFGEF2/AP1AR/SCAMP1/MON2/KLHL20/EXOC4/EXOC6B/AP1G1/GOLGA4/CCDC91/RABEP1/SNAP23/VPS13A/MACF1/EXOC8/GBF1/DOP1A/EXOC6/ATP2C1/EPS15/BBS2/BLZF1/KIF13A/RAB10/VPS13C/GOLPH3/RP2/NSF/KIF16B/CCDC93/LYPLA1/GOPC/SEC16A/GOLGA7/SPTBN1/ACSL3/EXOC2/VPS54/GGA2/SORT1/MYO5A/VPS35L/DOP1B/SORL1/LLGL1/GOLPH3L/ANK3/ARL3/MYO1B/WIPI1/RAB31/STEAP2/SORCS1	61
BP	GO:0016570	histone modification	164/3781	463/18723	8.97697e-15	1.84926e-11	1.50152e-11	KDM3B/SMARCAD1/ATRX/TAF1/REST/SIN3A/NIPBL/SETD2/CTCF/PARG/DCAF1/CTR9/EP400/EPC2/SUDS3/ASH1L/GTF3C4/CLOCK/SUZ12/ATF2/RIF1/SIRT1/RNF20/PHF20/TRIP12/KANSL1/UBR5/KDM5A/BAZ2A/NSD1/CREBBP/HUWE1/CDC73/MSL2/RBBP5/RCOR1/EP300/USP7/ARID4A/PAXIP1/PRDM4/CUL4B/KDM6A/BRPF3/PRMT5/SETD5/KMT2D/ZNF304/RYBP/KMT2E/MCM3AP/RTF1/MIER1/KANSL2/SETDB1/UBR2/USP22/KMT2C/WAC/WDR82/TRRAP/C6orf89/GLYR1/KDM3A/BAZ1B/KAT6A/USP16/…	164
BP	GO:0010498	proteasomal protein catabolic process	169/3781	490/18723	5.30713e-14	8.19952e-11	6.65766e-11	CUL3/TAF1/UBR3/CSNK1A1/CDC23/HECTD1/LTN1/RNF41/CLOCK/FBXW11/SIRT1/ITCH/UBXN2B/ZYG11B/MARCHF6/NEMF/SOCS4/FBXO38/MARCHF7/XPO1/ARMC8/FEM1B/ANKIB1/UBE4A/UBQLN1/HUWE1/KLHL42/ANAPC1/TMTC3/UBR1/PCNP/DNAJB14/USP7/UBE2K/CUL5/CUL4B/CDC27/DDI2/GSK3B/SMARCC1/TOPORS/KLHL20/UBXN4/RYBP/FAF2/TMF1/SPOPL/UBR2/ARIH1/UBQLN2/UBE2G1/RCHY1/WAC/PIAS1/RHBDD1/TMEM67/UBE2D3/FBXW8/DCAF12/CD2AP/RAD23B/UFL1/RMND5A/CRBN/FBXL17…	169
BP	GO:0043161	proteasome-mediated ubiquitin-dependent protein catabolic process	147/3781	412/18723	1.15037e-13	1.42186e-10	1.15449e-10	CUL3/TAF1/UBR3/CSNK1A1/CDC23/HECTD1/LTN1/CLOCK/FBXW11/SIRT1/ITCH/UBXN2B/ZYG11B/MARCHF6/NEMF/SOCS4/FBXO38/XPO1/ARMC8/FEM1B/ANKIB1/UBE4A/UBQLN1/HUWE1/KLHL42/ANAPC1/UBR1/PCNP/DNAJB14/USP7/UBE2K/CUL5/CUL4B/CDC27/GSK3B/SMARCC1/TOPORS/KLHL20/UBXN4/RYBP/FAF2/SPOPL/UBR2/ARIH1/UBQLN2/UBE2G1/RCHY1/WAC/PIAS1/TMEM67/UBE2D3/FBXW8/DCAF12/CD2AP/RAD23B/UFL1/RMND5A/CRBN/FBXL17/EDEM3/ECPAS/AMN1/BAG5/ERLIN1/KLHDC10…	147
BP	GO:0016197	endosomal transport	92/3781	230/18723	3.69693e-12	3.80784e-09	3.0918e-09	PREPL/ALS2/HEATR5B/SNX4/ANKFY1/KIAA1109/ZFYVE16/EPG5/RBSN/VPS4B/TBC1D5/VPS52/RAB14/GCC2/GOSR1/AP3B1/ACAP2/ALMS1/LMTK2/TBC1D14/USP7/PIKFYVE/TMCC1/HEATR5A/VPS50/ARFIP1/ERC1/EEA1/TBC1D23/VPS39/WASHC4/EVI5/TRAPPC10/DCTN1/CHMP3/GBF1/ARL8B/SNX6/AP5M1/DENND5A/CHMP2B/ATP9A/TMEM87B/STAM/ANKRD50/WASHC5/SNX27/SNX2/EPS15/DNM1L/VPS26A/RAB10/RGP1/MYO5B/SNX18/ITSN2/RIC1/VPS36/SPAG9/ITSN1/VAMP4/TMEM87A/BTBD8/CCD…	92
BP	GO:0044782	cilium organization	129/3781	368/18723	1.501e-11	1.32517e-08	1.07598e-08	NEK1/CEP97/RO60/CCP110/TOGARAM1/IFT81/BBS10/EXOC5/KIF3B/TTC26/CEP350/WDR35/KIF3A/ARL13B/KIAA0586/TTC17/TRAF3IP1/ARL6/INTU/FNBP1L/SEPTIN2/CPLANE1/CEP120/ARHGAP35/TMEM67/OCRL/TTBK2/CEP135/FAM149B1/TCTN2/CEP290/WDR19/DCTN1/GBF1/TCTN3/HTT/WDR11/TTC21B/TTC30B/CFAP126/DNAL1/RPGRIP1L/LCA5/DYNC2H1/BBS2/SEPTIN7/CEP20/TBC1D32/TTC30A/POC1B/ATMIN/KIFAP3/CILK1/PIBF1/CEP78/C2CD3/CEP162/SDCCAG8/ACTR2/DYNC2LI1/R…	129
BP	GO:0016482	cytosolic transport	72/3781	168/18723	1.81799e-11	1.38369e-08	1.1235e-08	PREPL/SRSF10/HEATR5B/ANKFY1/RBSN/PIK3C3/TBC1D5/VPS52/RAB14/GCC2/GOSR1/HOOK1/AP1AR/DNAJC13/LMTK2/TBC1D14/USP7/MON2/PIKFYVE/KIF5B/KLHL20/HEATR5A/ARFIP1/ERC1/EEA1/AP1G1/BECN1/TBC1D23/MAPK1/EVI5/CCDC91/TRAPPC10/VPS13A/DCTN1/CHMP3/GBF1/ARL8B/SNX6/DOP1A/DENND5A/ATP9A/TMEM87B/RAB21/SNX2/EPS15/VPS26A/RGP1/VPS13C/RIC1/ACTR2/SPAG9/TMEM87A/KIF16B/VPS35/SNX1/VPS54/SORT1/CLTC/DOP1B/SORL1/HOOK3/MYO1D/TANC2/SNX…	72
BP	GO:0000209	protein polyubiquitination	92/3781	236/18723	2.01509e-11	1.38369e-08	1.1235e-08	CUL3/TAF1/RNF111/CDC23/HECTD1/DDX3X/UBE3B/XIAP/RNF41/FBXW11/RNF20/UBE3A/ITCH/TRIP12/MARCHF6/UBR5/FBXO38/MARCHF7/TRIM44/TRIM32/ANKIB1/UBE4A/HUWE1/KLHL42/ZFP91/ANAPC1/TNKS2/UBE2K/CDC27/TOPORS/KLHL20/TRAF6/SHPRH/UBE3C/ARIH1/UBE2G1/RC3H2/MARCHF5/TNKS/UBE2D3/NPEPPS/RMND5A/FBXL17/TTC3/RNF4/CTNNB1/FBXO28/UBE2H/RNF14/AREL1/UBE4B/RC3H1/KBTBD7/LNPEP/TPP2/UBE2W/UBE2E1/KBTBD6/RNF6/RFFL/DZIP3/HACE1/CBL/BTRC/R…	92
BP	GO:0006513	protein monoubiquitination	38/3781	67/18723	5.03015e-11	3.10863e-08	2.52407e-08	CUL3/CTR9/WDR48/RNF20/MARCHF7/HUWE1/CDC73/FANCM/KLHL12/CUL4B/TOPORS/RYBP/WAC/UBE2D3/BCOR/UBE2W/UBE2E1/TRIM37/TSG101/DDB1/RAD18/CBL/RNF40/PEX12/BIRC2/RNF168/RNF2/LEO1/SKP1/FBXL2/PCGF5/NEDD4L/DTX3L/FANCL/TRIM25/BMI1/DTL/NEURL1	38
BP	GO:0098876	vesicle-mediated transport to the plasma membrane	61/3781	136/18723	6.46341e-11	3.63126e-08	2.94843e-08	PREPL/SNX4/CNST/KIAA1109/EXOC1/EPG5/EXOC5/VPS52/RAB14/ARFGEF2/ACAP2/LMTK2/EXOC4/EXOC6B/VPS50/VPS39/GOLGA4/RABEP1/MACF1/EXOC8/EXOC6/ATP9A/ATP2C1/ANKRD50/SNX27/EPS15/BBS2/BLZF1/VPS26A/KIF13A/RAB10/GOLPH3/NSF/CCDC93/LYPLA1/GOPC/RAB11A/SEC16A/GOLGA7/CMTM6/SPTBN1/VPS35/ACSL3/EXOC2/GGA2/VPS35L/SORL1/LLGL1/INPP5F/GOLPH3L/ANK3/ARL3/RAB11FIP4/RAB11FIP3/RAB31/GRIP1/AKAP5/DENND1B/ZDHHC2/STEAP2/SLC1A1	61
BP	GO:0006893	Golgi to plasma membrane transport	35/3781	60/18723	9.88636e-11	4.74794e-08	3.85512e-08	PREPL/CNST/EXOC1/EXOC5/ARFGEF2/EXOC4/EXOC6B/GOLGA4/RABEP1/MACF1/EXOC8/EXOC6/ATP2C1/BBS2/BLZF1/KIF13A/RAB10/GOLPH3/NSF/CCDC93/LYPLA1/GOPC/SEC16A/GOLGA7/SPTBN1/ACSL3/EXOC2/GGA2/VPS35L/LLGL1/GOLPH3L/ANK3/ARL3/RAB31/STEAP2	35
BP	GO:0009896	positive regulation of catabolic process	159/3781	492/18723	9.98758e-11	4.74794e-08	3.85512e-08	GIGYF2/PUM1/TAF1/PIK3C2A/DCP1A/CSNK1A1/METTL14/HECTD1/APC/HNRNPR/CNOT6/CELF1/RNF41/SIRT1/ITCH/SMCR8/ZYG11B/SOCS4/ROCK1/ATF6/SPTLC1/DHX36/TRIM32/ANKIB1/YTHDF3/RAB3GAP2/UBQLN1/HUWE1/TMTC3/TNRC6A/PDE12/GSK3B/DCP2/CNOT6L/ARIH1/UBQLN2/RC3H2/RCHY1/WAC/PIAS1/CNOT1/BECN1/FBXW8/ARNT/UFL1/DIS3/VPS13D/BCL2L11/VGLL4/TSC1/PIK3CB/LARP1/PAN2/HTT/TBK1/CNOT8/IDE/FYCO1/FBXL5/CAMKK2/RNF14/PAN3/METTL16/RAB3GAP1/AREL…	159
BP	GO:0031023	microtubule organizing center organization	62/3781	143/18723	2.53073e-10	1.11713e-07	9.07065e-08	CLASP2/FBXW11/CCP110/SIRT1/UBXN2B/VPS4B/XPO1/KIF3B/GCC2/PDCD6IP/ALMS1/KIF3A/CLASP1/PAFAH1B1/PPP1R12A/HAUS3/CEP44/USP33/CEP120/TMEM67/MPDZ/HAUS2/KIAA0753/CEP192/CEP68/CEP135/CEP295/DCTN1/CHMP3/CKAP5/CTNNB1/PATJ/CHMP2B/MDM1/SASS6/POC1B/TRIM37/CEP76/C2CD3/NIN/SDCCAG8/CDK5RAP2/HAUS6/NDE1/PCM1/CEP85/CHD3/SSX2IP/BBS4/ROCK2/MAP9/BRCA1/PKD2/BCAS3/PARD6B/BRCA2/RAB6C/PLK4/STIL/KIF11/PLK2/HEPACAM2	62
BP	GO:0030705	cytoskeleton-dependent intracellular transport	77/3781	195/18723	4.2409e-10	1.74725e-07	1.41869e-07	FBXW11/HNRNPU/SPG11/WASL/IFT81/COPG2/KIF3B/MYO6/TTC26/WDR35/HOOK1/AP3B1/AP3M1/KIF3A/OPA1/TRAF3IP1/PAFAH1B1/KIF5B/RHOT1/FNBP1L/BLOC1S6/DYNC1I2/LRPPRC/DYNC1H1/SPAST/CCDC186/WDR19/ARL8B/HTT/TTC21B/TTC30B/FYCO1/LCA5/MYO5C/RAB21/DYNC2H1/TTC30A/KIF13A/PURA/MYO5B/KIFAP3/CILK1/TRAK1/DYNC2LI1/IFT88/DYNC2I1/NDE1/BBS12/RPGR/PCM1/KIF1B/HSPA8/SSX2IP/SYNE2/TRAK2/ARMCX3/RAB27B/MYO5A/AP3M2/IFT74/HOOK3/MYO1D/TANC…	77
BP	GO:0042770	signal transduction in response to DNA damage	70/3781	172/18723	5.55615e-10	2.14606e-07	1.74251e-07	GIGYF2/ATRX/TP53BP1/CLOCK/ATF2/SIRT1/PTPN11/RAD17/MARCHF7/MYO6/FEM1B/ERCC6/TAOK1/SDE2/PAXIP1/XPC/ATR/ABRAXAS1/ETAA1/WAC/EIF2AK4/ACER2/DYRK1A/RINT1/ZMPSTE24/MAPK14/TOPBP1/NBN/CRY1/ABL1/PRKDC/RAD1/BRCC3/CDC5L/TAOK3/MRE11/CUL4A/USP10/INTS7/SPRED2/MDC1/MSH2/FOXO3/MAP3K20/USP28/BRCA1/ATM/MDM2/RFWD3/MDM4/GRB2/NEK11/FOXN3/PPM1D/RPS6KA6/HIPK2/WDR76/SPRED1/PLA2R1/BRCA2/CCND1/FANCD2/CDKN1B/DDX39B/SOX4/E2F7…	70
BP	GO:0051056	regulation of small GTPase mediated signal transduction	106/3781	302/18723	8.90582e-10	3.23753e-07	2.62873e-07	CUL3/ALS2/DENND4C/ERBIN/RALGAPB/RAF1/ARFGEF2/RALGAPA1/ARHGEF12/SOS2/SCAI/ARFGEF1/ARPP19/ARHGAP5/FAM13B/RASA1/ARHGAP35/CD2AP/RABL3/TRIO/MYO9A/GBF1/PIK3CB/DENND4A/ABL1/EPS8/MADD/KBTBD7/ITGB1/ARHGAP12/KBTBD6/KRAS/ABL2/GNA13/FBXO8/CRK/RALGPS1/NOTCH2/OPHN1/ARHGAP19/CBL/IQSEC1/AKAP13/SHOC2/SOS1/ITSN1/TNFAIP1/RALBP1/ARHGEF11/ARHGAP32/SIPA1L3/ECT2/SYDE2/ITGAV/SSX2IP/CDC42SE1/SPATA13/ARFGEF3/OGT/VAV2/FGD4…	106
BP	GO:0060271	cilium assembly	115/3781	337/18723	1.18884e-09	4.08168e-07	3.31415e-07	NEK1/CEP97/RO60/CCP110/TOGARAM1/IFT81/BBS10/EXOC5/KIF3B/TTC26/CEP350/WDR35/KIF3A/ARL13B/KIAA0586/TRAF3IP1/ARL6/INTU/FNBP1L/SEPTIN2/CPLANE1/CEP120/ARHGAP35/TMEM67/OCRL/TTBK2/CEP135/FAM149B1/TCTN2/CEP290/WDR19/DCTN1/GBF1/TCTN3/HTT/WDR11/DNAL1/RPGRIP1L/DYNC2H1/BBS2/SEPTIN7/CEP20/TBC1D32/POC1B/ATMIN/CILK1/PIBF1/C2CD3/CEP162/SDCCAG8/ACTR2/DYNC2LI1/RP2/IFT88/KIF27/BBS7/BBS9/DYNC2I1/PTPDC1/UNC119B/RPGR/…	115
BP	GO:0016050	vesicle organization	105/3781	300/18723	1.27886e-09	4.15966e-07	3.37746e-07	CUL3/CREB1/ALS2/SEC24B/USP8/TGFBRAP1/ANKFY1/ZFYVE16/SPG11/WASL/PIK3C3/VPS4B/RAB14/STAM2/GOSR1/HOOK1/PDCD6IP/VPS8/ARFGEF2/AP3B1/DNAJC13/CLCN3/SEC24C/KLHL12/PIKFYVE/VPS41/PAFAH1B1/KIF5B/TMCC1/TMF1/FNBP1L/C2CD5/BLOC1S6/PPP6C/OSBP/EEA1/AP1G1/PRKCI/VPS39/CD2AP/WASHC4/STX17/SNAP23/SEC24A/CHMP3/EXOC8/GBF1/ARL8B/SNX19/CHMP2B/YIPF5/SYNJ1/STAM/WASHC5/EPS15/USO1/KIF13A/STX12/SCARB2/SEC23B/TSG101/GOLPH3/VPS3…	105
BP	GO:0006402	mRNA catabolic process	86/3781	232/18723	1.72062e-09	5.31671e-07	4.31694e-07	GIGYF2/DHX9/PUM1/TTC37/PUM2/THRAP3/DCP1A/METTL14/SMG1/HNRNPR/CNOT6/CELF1/XRN2/ZC3H14/HNRNPU/ROCK1/DHX36/YTHDF3/GSPT1/NBAS/TNRC6A/MTOR/PDE12/ETF1/DCP2/CNOT6L/SMG6/RC3H2/FASTKD2/TENT2/CNOT1/NCBP1/DIS3/MAPK14/FASTKD3/ANGEL2/SMG7/EXOSC10/LARP1/PAN2/AGO1/CNOT8/PAN3/METTL16/PAIP1/XRN1/ZC3HAV1/FMR1/FXR1/MLH1/RC3H1/PNRC2/SECISBP2/SMG8/TUT7/AGO4/AGO3/EDC4/CSDE1/RNASEL/SYNCRIP/TIRAP/NUDT12/MYEF2/UPF2/ZHX2/…	86
BP	GO:0099111	microtubule-based transport	74/3781	190/18723	1.89983e-09	5.59094e-07	4.53961e-07	FBXW11/HNRNPU/SPG11/IFT81/COPG2/KIF3B/TTC26/WDR35/AP3B1/AP3M1/KIF3A/OPA1/TRAF3IP1/PAFAH1B1/KIF5B/RHOT1/BLOC1S6/DYNC1I2/LRPPRC/DYNC1H1/SPAST/WDR19/ARL8B/HTT/TTC21B/TTC30B/FYCO1/LCA5/RAB21/DYNC2H1/TTC30A/KIF13A/PURA/KATNIP/KIFAP3/CILK1/TRAK1/DYNC2LI1/IFT88/KIF27/DYNC2I1/NDE1/BBS12/RPGR/PCM1/KIF1B/HSPA8/SSX2IP/TRAK2/ARMCX3/RAB27B/STK36/AP3M2/IFT74/SPA17/RFX3/SPEF2/MREG/IFT140/DST/ARHGAP21/DNAH5/ARL3…	74
BP	GO:0007034	vacuolar transport	64/3781	157/18723	2.77414e-09	7.79281e-07	6.32742e-07	PIK3R4/ALS2/TGFBRAP1/ANKFY1/ZFYVE16/EPG5/RBSN/VPS4B/VPS52/GCC2/HOOK1/AP3B1/AP3M1/SCYL2/HMGXB4/VPS41/TMEM106B/M6PR/AP1G1/BECN1/VPS39/NCOA4/CCDC91/VPS13A/ATG14/VPS13D/CHMP3/ARL8B/CHMP2B/MTM1/STAM/SNX27/KIF13A/VPS13C/SCARB2/TSG101/TRAK1/NDFIP1/VPS36/NEDD4/VPS37A/HSPA8/MON1B/NDFIP2/TRAK2/IGF2R/TMEM50B/LYST/VTA1/LEPROT/VPS35/VPS54/SORT1/GNPTAB/LAMP2/SORL1/HOOK3/NPC1/SNX16/HGSNAT/DTX3L/LRP1/RHOB/CACNG4	64
BP	GO:0007163	establishment or maintenance of cell polarity	81/3781	218/18723	4.46449e-09	1.19959e-06	9.74015e-07	ERBIN/CLASP2/FBXW11/UBXN2B/CDC42BPB/ROCK1/PDCD6IP/RICTOR/DLG1/CLASP1/GSK3B/ARFGEF1/PAFAH1B1/RAB11FIP2/ARHGAP35/CRKL/PRKCI/DLG5/DCTN1/MYO9A/CKAP5/GBF1/CTNNA1/HTT/SYNJ2BP/PATJ/RPGRIP1L/SNX27/ITGB1/WEE1/RAB10/LIN7C/GOLPH3/CRK/SDCCAG8/OPHN1/RAP1B/ACTR2/CDK5RAP2/DOCK7/SHTN1/NDE1/ARHGEF11/PTK2/KIF20B/TTC8/SIPA1L3/PARD3B/RHOBTB1/ROCK2/PARVA/NUMA1/LLGL1/JAM3/BCAS3/MPP7/HSP90AA1/DST/PARD6B/CAP2/PKD1/MAP7/…	81
BP	GO:0007265	Ras protein signal transduction	113/3781	337/18723	5.14852e-09	1.32574e-06	1.07645e-06	CUL3/ALS2/NF1/DENND4C/ERBIN/USP8/CHUK/RAF1/ROCK1/ARFGEF2/G3BP2/KPNB1/FARP2/ARHGEF12/SCAI/ARFGEF1/ARPP19/NCKAP1/ZNF304/ARHGAP5/RASA1/SETDB1/ABI2/ARHGAP35/CRKL/RABL3/RAB33B/PHACTR4/RREB1/G3BP1/GBF1/PIK3CB/DENND4A/HACD3/ABL1/CYFIP1/EPS8/MADD/RAB21/KBTBD7/RAPGEF2/ITGB1/KBTBD6/KRAS/ABL2/GNA13/FBXO8/CRK/RALGPS1/NOTCH2/OPHN1/RAP1B/HACE1/CBL/IQSEC1/AKAP13/SHTN1/SHOC2/SOS1/TNFAIP1/RALBP1/ARHGEF11/SSX2IP/G…	113
BP	GO:0007041	lysosomal transport	50/3781	114/18723	8.34542e-09	2.06299e-06	1.67506e-06	ALS2/TGFBRAP1/ANKFY1/ZFYVE16/EPG5/RBSN/VPS4B/VPS52/GCC2/HOOK1/AP3B1/AP3M1/SCYL2/HMGXB4/VPS41/TMEM106B/M6PR/AP1G1/VPS39/NCOA4/CCDC91/ATG14/CHMP3/ARL8B/CHMP2B/MTM1/SNX27/KIF13A/SCARB2/TSG101/TRAK1/NEDD4/HSPA8/TRAK2/IGF2R/LYST/VPS35/VPS54/SORT1/GNPTAB/LAMP2/SORL1/HOOK3/NPC1/SNX16/HGSNAT/DTX3L/LRP1/RHOB/CACNG4	50
BP	GO:0051650	establishment of vesicle localization	64/3781	161/18723	9.04354e-09	2.14958e-06	1.74537e-06	CUL3/CLASP2/FBXW11/SPG11/WASL/TRIP11/KIF3B/MYO6/GOSR1/AP1AR/AP3B1/AP3M1/KIF3A/KLHL12/ARL6/CLASP1/PAFAH1B1/KIF5B/EXOC4/EXOC6B/FNBP1L/BLOC1S6/PPP6C/DYNC1H1/TBC1D23/CCDC186/SNAP23/GBF1/CTNNB1/HTT/WDR11/EXOC6/FYCO1/SYNJ1/MYO5C/BBS2/KIF13A/MYO5B/KIFAP3/PSEN1/TRAK1/FAM91A1/BBS7/NDE1/SNAP29/TMED10/RAB11A/BBS4/TRAK2/C17orf75/RAB27B/MYO5A/AP3M2/SHROOM2/MYO1D/TANC2/CEP19/MREG/MYO1B/WIPI1/KIF5C/SYBU/LIN7A/M…	64
BP	GO:1903311	regulation of mRNA metabolic process	99/3781	288/18723	1.08943e-08	2.49358e-06	2.02468e-06	CCNT1/GIGYF2/DHX9/PUM1/YTHDC1/REST/HNRNPK/PUM2/THRAP3/DCP1A/SON/SRSF10/METTL14/CTR9/NUP98/HNRNPR/CNOT6/CELF1/CPSF6/ZC3H14/RNF20/HNRNPU/SRPK2/ROCK1/DHX36/YTHDF3/PAPOLA/CDC73/PTCD2/NBAS/TNRC6A/MTOR/PDE12/DCP2/CNOT6L/SLTM/RC3H2/FASTKD2/RBM23/CNOT1/NCBP1/DYRK1A/NUDT21/DIS3/MAPK14/FASTKD3/AHCYL1/ANGEL2/DDX17/LARP1/PAN2/FAM172A/CNOT8/VIRMA/RBM25/PAN3/METTL16/PAIP1/RBM39/ZC3HAV1/RBFOX2/RBMXL1/FMR1/FXR1/…	99
BP	GO:0010970	transport along microtubule	62/3781	155/18723	1.15851e-08	2.55699e-06	2.07616e-06	FBXW11/HNRNPU/SPG11/IFT81/COPG2/KIF3B/TTC26/WDR35/AP3B1/AP3M1/KIF3A/OPA1/TRAF3IP1/PAFAH1B1/KIF5B/RHOT1/BLOC1S6/DYNC1I2/LRPPRC/DYNC1H1/SPAST/WDR19/ARL8B/HTT/TTC21B/TTC30B/FYCO1/LCA5/RAB21/DYNC2H1/TTC30A/KIF13A/PURA/KIFAP3/CILK1/TRAK1/DYNC2LI1/IFT88/DYNC2I1/NDE1/BBS12/RPGR/PCM1/KIF1B/HSPA8/SSX2IP/TRAK2/ARMCX3/RAB27B/AP3M2/IFT74/MREG/IFT140/DST/ARHGAP21/ARL3/MAP1A/KIF5C/MAPT/TUB/SYBU/MAP1B	62
BP	GO:0000956	nuclear-transcribed mRNA catabolic process	49/3781	112/18723	1.29533e-08	2.76039e-06	2.24132e-06	TTC37/THRAP3/DCP1A/SMG1/CNOT6/XRN2/DHX36/GSPT1/NBAS/TNRC6A/PDE12/ETF1/DCP2/CNOT6L/SMG6/RC3H2/TENT2/CNOT1/NCBP1/DIS3/SMG7/EXOSC10/PAN2/AGO1/CNOT8/PAN3/XRN1/MLH1/RC3H1/PNRC2/SECISBP2/SMG8/TUT7/EDC4/CSDE1/UPF2/TNRC6B/CPEB3/TENT4B/CNOT7/TNRC6C/CASC3/ATM/PATL1/NOCT/TOB1/AGO2/ZFP36L2/BTG2	49
BP	GO:0031503	protein-containing complex localization	80/3781	220/18723	1.70179e-08	3.50568e-06	2.84646e-06	YTHDC1/SETD2/SMG1/HNRNPU/WASL/IFT81/NUP133/XPO1/KIF3B/THOC2/TTC26/WDR35/USP46/TPR/DLG1/TRAF3IP1/KIF5B/ATR/NOP9/MCM3AP/DAG1/HIP1/SMG6/NUP160/AKAP9/NCBP1/NUP155/FYTTD1/WDR19/SMG7/AP2B1/NMD3/TSC1/SYNJ2BP/TTC21B/TTC30B/ADAM10/GLE1/LCA5/LSG1/SDAD1/WASHC5/DYNC2H1/EPS15/TTC30A/PURA/TERF1/CILK1/MIOS/OPHN1/ABCE1/DYNC2LI1/IFT88/DYNC2I1/SUPT6H/NDC1/BBS12/RPGR/PCM1/UPF2/RAB11A/SSX2IP/NPTN/VPS35/NUP107/ANKS1B…	80
BP	GO:0016236	macroautophagy	99/3781	291/18723	1.98153e-08	3.95027e-06	3.20745e-06	PIK3R4/TRAPPC8/SMG1/EXOC1/EPG5/SIRT1/WDFY3/SMCR8/UBXN2B/PIK3C3/VPS4B/TBC1D5/ATG2B/SPTLC1/STAM2/RAB3GAP2/UBQLN1/HUWE1/TBC1D14/MTOR/PIKFYVE/VPS41/EXOC4/NBR1/ATP2A2/USP30/UBQLN2/RUBCN/WAC/ATP6V1A/AMBRA1/BECN1/EXOC7/VPS39/UFL1/STX17/RAB33B/MAPK8/ATG14/ATG9A/VPS13D/TBC1D12/RB1CC1/CHMP3/TSC1/EXOC8/ARL8B/PIK3CA/SNX6/LARP1/HTT/TBK1/CHMP2B/FYCO1/RAB3GAP1/MTM1/STAM/VPS26A/STX12/VPS13C/MAP3K7/PSEN1/TSG101/P…	99
BP	GO:0043543	protein acylation	86/3781	243/18723	2.17076e-08	4.06825e-06	3.30324e-06	TAF1/SIN3A/CTCF/EP400/DDX3X/EPC2/GTF3C4/CLOCK/ATF2/NAA35/SIRT1/PHF20/KANSL1/NAA30/DIP2B/CREBBP/MSL2/TAOK1/EP300/PAXIP1/NAA25/GSK3B/BRPF3/SETD5/MCM3AP/KANSL2/PPM1A/USP22/ZDHHC17/TRRAP/GLYR1/KAT6A/ZZZ3/SMAD4/ZMPSTE24/CEP295/KANSL3/ESCO1/BRD8/SMC5/HCFC1/NAA15/KMT2A/TADA1/HAT1/NMT1/DR1/NAA16/MECP2/MAP3K7/ZDHHC21/KAT7/NCOA1/NAA50/NCOA3/PHF20L1/KAT6B/ZDHHC20/RPS6KA5/JADE3/CDYL/ARNTL/DLD/TADA2B/GOLGA7/A…	86
BP	GO:0007098	centrosome cycle	54/3781	130/18723	2.17236e-08	4.06825e-06	3.30324e-06	CCP110/SIRT1/UBXN2B/VPS4B/XPO1/KIF3B/PDCD6IP/ALMS1/KIF3A/PPP1R12A/HAUS3/CEP44/USP33/CEP120/TMEM67/HAUS2/KIAA0753/CEP192/CEP68/CEP135/CEP295/DCTN1/CHMP3/CKAP5/CTNNB1/CHMP2B/MDM1/SASS6/POC1B/TRIM37/CEP76/C2CD3/NIN/SDCCAG8/CDK5RAP2/HAUS6/NDE1/PCM1/CEP85/CHD3/SSX2IP/BBS4/ROCK2/MAP9/BRCA1/PKD2/PARD6B/BRCA2/RAB6C/PLK4/STIL/KIF11/PLK2/HEPACAM2	54
BP	GO:0032886	regulation of microtubule-based process	85/3781	240/18723	2.51794e-08	4.57673e-06	3.71611e-06	APC/CLASP2/CEP97/SIRT1/HNRNPU/TOGARAM1/VPS4B/ROCK1/XPO1/PDCD6IP/KLHL42/TAOK1/ALMS1/TPR/SENP6/TRAF3IP1/CLASP1/GSK3B/PAFAH1B1/RHOT1/CAMSAP1/CEP120/AKAP9/TMEM67/MPDZ/DYNC1H1/DYRK1A/TTBK2/SPAST/CEP295/MACF1/DCTN1/CHMP3/SLAIN2/CKAP5/RNF4/PATJ/CAMSAP2/CHMP2B/TTC21B/ABL1/CLIP1/BBS2/MDM1/MECP2/TRIM37/CEP76/OCLN/NIN/ATXN7/CDK5RAP2/DIXDC1/PRUNE1/HDGFL3/BBS4/ROCK2/MAP9/NUMA1/BRCA1/CLTC/CKAP2/FKBP4/PKD1/ARL3…	85
BP	GO:0043254	regulation of protein-containing complex assembly	134/3781	428/18723	2.64327e-08	4.66727e-06	3.78962e-06	CREB1/DDX3X/GMFB/CAND1/PTPN11/TOGARAM1/ICE1/RAF1/WASL/BBS10/LATS1/SLF2/IMPACT/TWF1/AP1AR/FNIP1/RICTOR/FARP2/EP300/DLG1/SENP6/MTOR/TRAF3IP1/CLASP1/GSK3B/ARFGEF1/ATR/NCKAP1/CAPZA2/ATF7IP/RASA1/CAMSAP1/PPM1A/ABI2/ARFIP1/AKAP9/MTPN/DYRK1A/FER/CRBN/BCL2L11/SLF1/DCTN1/SLAIN2/HCFC1/AIDA/CKAP5/SSH1/RNF4/DHX33/CAMSAP2/ABL1/CLIP1/ADD1/CYFIP1/EPS8/TMOD3/JMY/WASHC5/SPTAN1/MECP2/FMN1/TFIP11/SPIRE1/TERF1/OCLN/…	134
BP	GO:0006401	RNA catabolic process	95/3781	278/18723	2.97396e-08	5.00689e-06	4.06538e-06	GIGYF2/DHX9/PUM1/TTC37/PUM2/THRAP3/DCP1A/MTREX/METTL14/SMG1/HNRNPR/CNOT6/CELF1/XRN2/ZC3H14/PHAX/HNRNPU/ROCK1/DHX36/YTHDF3/GSPT1/NBAS/TNRC6A/MTOR/PDE12/ETF1/DCP2/DROSHA/CNOT6L/SMG6/RC3H2/FASTKD2/LRPPRC/TENT2/CNOT1/NCBP1/DIS3/MAPK14/FASTKD3/ANGEL2/SMG7/EXOSC10/LARP1/PAN2/AGO1/CNOT8/PAN3/METTL16/PAIP1/DICER1/XRN1/ZC3HAV1/FMR1/FXR1/MLH1/RC3H1/PNRC2/SECISBP2/NAF1/SMG8/TUT7/DIS3L/AGO4/AGO3/EDC4/CSDE1/R…	95
BP	GO:0070507	regulation of microtubule cytoskeleton organization	59/3781	148/18723	2.99765e-08	5.00689e-06	4.06538e-06	APC/CLASP2/CEP97/HNRNPU/TOGARAM1/VPS4B/ROCK1/TAOK1/TPR/SENP6/TRAF3IP1/CLASP1/GSK3B/PAFAH1B1/CAMSAP1/AKAP9/MPDZ/DYNC1H1/DYRK1A/TTBK2/SPAST/DCTN1/SLAIN2/CKAP5/RNF4/PATJ/CAMSAP2/CHMP2B/ABL1/CLIP1/MECP2/OCLN/NIN/ATXN7/CDK5RAP2/DIXDC1/PRUNE1/HDGFL3/MAP9/NUMA1/CLTC/CKAP2/FKBP4/PKD1/ARL3/PHLDB1/CDKN1B/MAP1A/PHLDB2/PRKAA1/MAPT/PRKAA2/MAP1B/INPP5J/STMND1/NAV3/EPHA3/BMERB1/TRIM36	59
BP	GO:2001020	regulation of response to DNA damage stimulus	79/3781	219/18723	3.12183e-08	5.05781e-06	4.10672e-06	DHX9/HNRNPK/USP47/BCLAF1/SETD2/TP53BP1/PARG/ARID2/NEK4/SMG1/WDR48/RIF1/SIRT1/TRIP12/ERCC4/UBR5/MARCHF7/TRIM32/FEM1B/ERCC6/SLF2/PPP4R2/POT1/PAXIP1/ATR/ABRAXAS1/ETAA1/RNF169/DYRK1A/TAF9B/KMT5B/SHLD2/ZMPSTE24/SLF1/EYA3/CRY1/ABL1/PRKDC/FMR1/BRCC3/FXR1/SMCHD1/TFIP11/SPIRE1/KAT7/ACTR2/CUL4A/RNF168/NSD2/SPRED2/FAM168A/KLHL15/SPIDR/USP1/MAP3K20/SKIL/OTUB2/PARP1/BRCA1/FIGNL1/HELB/ATM/MDM2/RFWD3/BCL2/ARMT1…	79
BP	GO:0006473	protein acetylation	74/3781	201/18723	3.19182e-08	5.05781e-06	4.10672e-06	TAF1/SIN3A/CTCF/EP400/DDX3X/EPC2/GTF3C4/CLOCK/ATF2/NAA35/SIRT1/PHF20/KANSL1/NAA30/DIP2B/CREBBP/MSL2/TAOK1/EP300/PAXIP1/NAA25/GSK3B/BRPF3/SETD5/MCM3AP/KANSL2/USP22/TRRAP/GLYR1/KAT6A/ZZZ3/SMAD4/ZMPSTE24/CEP295/KANSL3/ESCO1/BRD8/SMC5/HCFC1/NAA15/KMT2A/TADA1/HAT1/DR1/NAA16/MECP2/MAP3K7/KAT7/NCOA1/NAA50/NCOA3/PHF20L1/KAT6B/RPS6KA5/JADE3/ARNTL/TADA2B/ACTL6A/MEAF6/YEATS4/FAM161A/OGT/BRCA1/JADE2/MSL1/BRC…	74
BP	GO:0051656	establishment of organelle localization	124/3781	390/18723	3.28479e-08	5.07499e-06	4.12068e-06	CUL3/CDC23/CLASP2/SNX4/FBXW11/HNRNPU/UBXN2B/SPG11/WASL/COPG2/VPS4B/TRIP11/XPO1/KIF3B/MYO6/GOSR1/AP1AR/KPNB1/AP3B1/AP3M1/KIF3A/KLHL12/DLG1/PDPK1/OPA1/ARL6/CENPC/CLASP1/PAFAH1B1/KIF5B/RHOT1/NOP9/EXOC4/EXOC6B/FNBP1L/BLOC1S6/PPP6C/CEP120/LRPPRC/DYNC1H1/BECN1/TBC1D23/CHAMP1/FER/SPAST/CCDC186/SNAP23/DCTN1/NMD3/GBF1/CTNNB1/HTT/WDR11/EXOC6/CHMP2B/FYCO1/SYNJ1/LSG1/MYO5C/SDAD1/MLH1/BBS2/ITGB1/KIF13A/SPIRE1…	124
BP	GO:0051052	regulation of DNA metabolic process	116/3781	359/18723	3.39704e-08	5.12041e-06	4.15756e-06	DHX9/SMARCAD1/ATRX/SETD2/TP53BP1/YLPM1/PARG/ARID2/SMG1/WDR48/RIF1/SIRT1/HNRNPU/TRIP12/ERCC4/UBR5/DHX36/MSH3/ERCC6/SLF2/PPP4R2/POT1/KPNA1/TNKS2/XRCC5/USP7/PAXIP1/PRMT5/ATR/ABRAXAS1/OTUD4/DCP2/SMG6/BMPR2/TNKS/RNF169/USP9X/MAPK1/KMT5B/SHLD2/ZMPSTE24/NBN/RLF/GRHL2/SLF1/EXOSC10/EYA3/PIK3CA/CTNNB1/KMT2A/PRKDC/SLX4/XRN1/NEK7/BRCC3/WRN/MLH1/NAF1/SMCHD1/MECP2/NUCKS1/KDM1B/TFIP11/SPIRE1/TERF1/MPHOSPH8/MRE1…	116
BP	GO:0009791	post-embryonic development	38/3781	80/18723	3.75247e-08	5.5215e-06	4.48322e-06	GIGYF2/ATRX/IREB2/ASH1L/MTOR/MORC3/RC3H2/KDM5B/ZFX/BCL2L11/SMAD2/ABL1/BPNT2/MMUT/MECP2/PSEN1/PLAGL2/SGPL1/IGF2R/STK36/ITPR1/ACADM/CCDC47/SEMA3C/BCL2/TIPARP/TGFBR1/HEG1/ARID5B/GATA3/AGO2/ALDH5A1/SELENOP/FBN1/FGFR2/ETNK2/NR4A2/EFEMP1	38
BP	GO:0051648	vesicle localization	67/3781	177/18723	4.06512e-08	5.75155e-06	4.67001e-06	CUL3/CLASP2/FBXW11/SPG11/WASL/TRIP11/KIF3B/MYO6/GOSR1/AP1AR/AP3B1/AP3M1/KIF3A/KLHL12/ARL6/CLASP1/PAFAH1B1/KIF5B/EXOC4/EXOC6B/FNBP1L/BLOC1S6/PPP6C/DYNC1H1/TBC1D23/CCDC186/SNAP23/GBF1/CTNNB1/HTT/WDR11/EXOC6/FYCO1/SYNJ1/MYO5C/BBS2/USO1/KIF13A/MYO5B/KIFAP3/PSEN1/TRAK1/FAM91A1/BBS7/NDE1/SNAP29/TMED10/RAB11A/BBS4/TRAK2/C17orf75/PCLO/RAB27B/MYO5A/AP3M2/PTEN/SHROOM2/MYO1D/TANC2/CEP19/MREG/MYO1B/WIPI1/KIF…	67
BP	GO:1990778	protein localization to cell periphery	109/3781	333/18723	4.09496e-08	5.75155e-06	4.67001e-06	PREPL/APPL1/DENND4C/HECTD1/CLASP2/CNST/EXOC5/ROCK1/SLMAP/ARL13B/DLG1/PDPK1/KIF5B/RAB11FIP2/DAG1/C2CD5/PRKCI/FCHO2/GOLGA4/RABEP1/FAM126B/EPB41/WDR19/MACF1/EFCAB7/PTPN9/ADAM10/EFR3A/LZTFL1/ATP2C1/BBS2/RAPGEF2/BLZF1/ITGB1/KIF13A/RAB10/LIN7C/GOLPH3/PIP5K1A/LRP6/NSF/TTC8/LYPLA1/GOPC/RAB11A/SEC16A/GOLGA7/ROCK2/RAB3D/SEC23A/SPTBN1/VPS35/ACSL3/PLS1/GGA2/NUMA1/MYO5A/CLTC/DCHS1/PPFIA1/BAG4/ADAM22/AFDN/GOLP…	109
BP	GO:0032984	protein-containing complex disassembly	80/3781	224/18723	4.23153e-08	5.8113e-06	4.71853e-06	ARID2/ARID1A/SCAF8/APC/CLASP2/EPG5/SMARCC2/SMCR8/VPS4B/GFM2/DHX8/SUPT16H/UBQLN1/TWF1/TAOK1/GSPT1/KIF2A/CLASP1/GSK3B/SMARCC1/KIF5B/SETX/ETF1/CAPZA2/ATP2A2/CAMSAP1/RUBCN/MTPN/TTBK2/SPAST/STX17/ZMPSTE24/ATG14/CHMP3/CKAP5/PIK3CA/CAMSAP2/CHMP2B/FYCO1/ADD1/SYNJ1/EPS8/TMOD3/GLE1/SPTAN1/TFIP11/TSG101/ATXN7/ABCE1/SNAP29/NSF/HSPA8/LIMA1/HDGFL3/SNX14/VTA1/SPTBN1/CARMIL1/KIF24/LAMP2/MICAL2/SWAP70/IGF1R/UBQLN…	80
BP	GO:0031331	positive regulation of cellular catabolic process	132/3781	427/18723	7.67561e-08	1.00953e-05	8.19695e-06	GIGYF2/PUM1/TAF1/PIK3C2A/DCP1A/CSNK1A1/METTL14/HECTD1/HNRNPR/CNOT6/CELF1/SIRT1/ITCH/SMCR8/ZYG11B/SOCS4/ROCK1/ATF6/SPTLC1/DHX36/ANKIB1/YTHDF3/RAB3GAP2/UBQLN1/TMTC3/TNRC6A/PDE12/GSK3B/DCP2/CNOT6L/ARIH1/UBQLN2/RC3H2/RCHY1/WAC/PIAS1/CNOT1/BECN1/FBXW8/ARNT/UFL1/DIS3/VPS13D/BCL2L11/VGLL4/TSC1/PIK3CB/LARP1/PAN2/HTT/TBK1/CNOT8/FYCO1/FBXL5/CAMKK2/RNF14/PAN3/METTL16/RAB3GAP1/ZC3HAV1/FMR1/MLH1/RC3H1/TUT7/SO…	132
BP	GO:0061564	axon development	142/3781	467/18723	7.67765e-08	1.00953e-05	8.19695e-06	CREB1/SIN3A/ALS2/ADNP/TOP2B/PTPN11/SPG11/DIP2B/TRIM32/EIF4G2/SLC25A46/LMTK2/GSK3B/PAFAH1B1/KIF5B/DAG1/MTR/USP33/BMPR2/ZDHHC17/ARHGAP35/PAK2/USP9X/SPAST/SMAD4/GOLGA4/TRIO/MACF1/PPP3CB/CTNNA1/CERS2/CAMSAP2/ABL1/CYFIP1/RAB21/ITGB1/RYK/RAPH1/RAB10/LRIG2/RNF6/PSEN1/TRAK1/NIN/NOTCH2/OPHN1/DOCK7/SHTN1/SOS1/AFG3L2/ULK2/PTK2/TTC8/RPS6KA5/GLI3/PTPRF/RAB11A/NPTN/TRAK2/TCTN1/STK24/B3GNT2/SKIL/FBXO45/SEMA4F/V…	142
BP	GO:1902117	positive regulation of organelle assembly	33/3781	67/18723	9.82158e-08	1.26453e-05	1.02674e-05	CNOT6/CCP110/VPS4B/PDCD6IP/RAB3GAP2/G3BP2/CNOT6L/CEP120/ARHGAP35/CNOT1/DYNC1H1/BECN1/CEP135/CEP295/G3BP1/PAN2/HTT/PAN3/RAB3GAP1/SEPTIN7/ATMIN/PIP4K2C/MAPK9/BBS4/PIP4K2B/TAPT1/NUMA1/ASAP1/MNS1/ELAPOR1/PLK4/SDC4/ZMYND10	33
BP	GO:0000077	DNA damage checkpoint signaling	48/3781	115/18723	1.08185e-07	1.36446e-05	1.10788e-05	GIGYF2/TP53BP1/CLOCK/ATF2/PTPN11/RAD17/FEM1B/ERCC6/TAOK1/SDE2/XPC/ATR/ABRAXAS1/ETAA1/WAC/EIF2AK4/RINT1/MAPK14/TOPBP1/NBN/CRY1/PRKDC/RAD1/BRCC3/CDC5L/TAOK3/MRE11/CUL4A/INTS7/MDC1/MSH2/MAP3K20/USP28/BRCA1/ATM/MDM2/RFWD3/NEK11/FOXN3/WDR76/CCND1/FANCD2/CDKN1B/DDX39B/SOX4/BRIP1/DTL/PLK2	48
BP	GO:0043414	macromolecule methylation	103/3781	316/18723	1.2108e-07	1.49655e-05	1.21514e-05	ATRX/SETD2/CTCF/METTL14/CTR9/ASH1L/SUZ12/RIF1/SIRT1/RNF20/ZC3H13/FBXO11/CBLL1/BAZ2A/NSD1/CREBBP/RBBP5/PRMT9/GSPT1/METTL15/ARID4A/PAXIP1/PRDM4/KDM6A/THUMPD3/TRMT61B/PRMT5/FAM98B/NSUN3/SETD5/RNMT/KMT2D/ETF1/ZNF304/KMT2E/ATF7IP/RTF1/SETDB1/KMT2C/WDR82/KDM3A/CMTR2/SMAD4/KMT5B/ZMPSTE24/ZCCHC4/RLF/GRHL2/TYW3/PRMT3/TET2/TRMT10A/PIK3CA/BCOR/CTNNB1/SETD1B/KMT2A/TRMT1L/VIRMA/METTL16/SETD7/PRDM2/ALKBH8/PCMT…	103
BP	GO:0006913	nucleocytoplasmic transport	99/3781	301/18723	1.3013e-07	1.54654e-05	1.25573e-05	DHX9/YTHDC1/TNPO1/IPO11/SETD2/CTDSPL2/APPL1/IPO8/SMG1/NUP98/IPO7/CPSF6/PHAX/PTPN11/NUP58/NEMF/UBR5/NUP133/XPO1/THOC2/UHMK1/KPNB1/KPNA1/TPR/KPNA6/GSK3B/NOP9/PPP1R12A/RANBP2/MCM3AP/FAM53C/SMG6/POM121/XPO4/NUP160/RSRC1/NCBP1/NUP153/NUP155/WASHC4/RBM22/MAPK1/MAPK14/FYTTD1/IPO9/AHCYL1/SMG7/NMD3/TSC1/DNAJC27/APPL2/EFCAB7/GLE1/LSG1/SDAD1/RANBP6/NUP54/NUP188/PSEN1/SUFU/TNPO3/STAT3/ABCE1/AKAP13/NUP50/NEDD…	99
BP	GO:0051169	nuclear transport	99/3781	301/18723	1.3013e-07	1.54654e-05	1.25573e-05	DHX9/YTHDC1/TNPO1/IPO11/SETD2/CTDSPL2/APPL1/IPO8/SMG1/NUP98/IPO7/CPSF6/PHAX/PTPN11/NUP58/NEMF/UBR5/NUP133/XPO1/THOC2/UHMK1/KPNB1/KPNA1/TPR/KPNA6/GSK3B/NOP9/PPP1R12A/RANBP2/MCM3AP/FAM53C/SMG6/POM121/XPO4/NUP160/RSRC1/NCBP1/NUP153/NUP155/WASHC4/RBM22/MAPK1/MAPK14/FYTTD1/IPO9/AHCYL1/SMG7/NMD3/TSC1/DNAJC27/APPL2/EFCAB7/GLE1/LSG1/SDAD1/RANBP6/NUP54/NUP188/PSEN1/SUFU/TNPO3/STAT3/ABCE1/AKAP13/NUP50/NEDD…	99
BP	GO:0030010	establishment of cell polarity	56/3781	143/18723	1.3632e-07	1.58954e-05	1.29064e-05	FBXW11/UBXN2B/ROCK1/RICTOR/CLASP1/GSK3B/ARFGEF1/PAFAH1B1/RAB11FIP2/CRKL/PRKCI/DCTN1/MYO9A/GBF1/HTT/PATJ/SNX27/ITGB1/WEE1/RAB10/GOLPH3/CRK/SDCCAG8/OPHN1/RAP1B/CDK5RAP2/DOCK7/SHTN1/NDE1/ARHGEF11/PTK2/KIF20B/TTC8/SIPA1L3/PARD3B/ROCK2/NUMA1/LLGL1/JAM3/BCAS3/MPP7/HSP90AA1/PKD1/MYO18A/AMOTL2/GATA3/AMOT/GJA1/AMOTL1/MAP1B/WNT5A/FAT1/SLC9A3R1/MISP/FGF10/CCL19	56
BP	GO:0043087	regulation of GTPase activity	111/3781	348/18723	1.41443e-07	1.61874e-05	1.31435e-05	ALS2/GAPVD1/NF1/RABGAP1/RALGAPB/LARS1/TBC1D5/RAB3GAP2/WNK1/RALGAPA1/RICTOR/TBC1D15/TBC1D14/MTOR/GSK3B/ARFGEF1/PAFAH1B1/RAB11FIP2/RASA1/TRAPPC6B/CRKL/TBCK/OCRL/SNX13/EVI5/TBC1D12/MYO9A/IQGAP1/TSC1/ASAP2/ELMOD2/EIF5/RAB3GAP1/SBF2/PKP4/RAPGEF2/DOCK9/ITGB1/MMUT/ARHGAP12/RGP1/SNX18/PIP5K1A/EIF2S1/CRK/RIC1/IQSEC1/DOCK7/RALBP1/PTK2/TTC8/TBC1D9B/SIPA1L3/ECT2/SYDE2/RUNDC1/SNX9/LRCH1/TBC1D8B/CPEB2/TBC1D9/C…	111
BP	GO:0010506	regulation of autophagy	103/3781	317/18723	1.44202e-07	1.6203e-05	1.31562e-05	PIK3C2A/SMG1/EXOC1/SIRT1/SMCR8/ERCC4/ROCK1/ATF6/SPTLC1/EIF4G2/RAB3GAP2/UBQLN1/TBC1D14/EP300/TAB3/MTOR/GSK3B/EXOC4/USP33/USP30/UBQLN2/RUBCN/WAC/ATP6V1A/ACER2/BECN1/SOGA1/DCAF12/EXOC7/ZKSCAN3/UFL1/ZMPSTE24/MAPK8/VPS13D/BCL2L11/HERC1/TSC1/EXOC8/PIK3CA/SNX6/PIK3CB/LARP1/HTT/TBK1/ABL1/FYCO1/CAMKK2/RAB3GAP1/MTM1/DNM1L/VPS26A/VPS13C/MAP3K7/ABL2/STAT3/MTMR9/MID2/PAFAH1B2/USP10/NEDD4/MTMR4/PIP4K2C/TAB2/MT…	103
BP	GO:1902115	regulation of organelle assembly	68/3781	186/18723	1.54486e-07	1.70486e-05	1.38427e-05	CNOT6/CEP97/CCP110/HNRNPU/SMCR8/VPS4B/PDCD6IP/RAB3GAP2/G3BP2/ALMS1/TPR/TBC1D14/SENP6/PIKFYVE/CNOT6L/UBQLN2/CEP120/ARHGAP35/CNOT1/DYNC1H1/BECN1/CEP135/SMAD4/CEP295/G3BP1/TBC1D12/RNF4/PAN2/HTT/CHMP2B/PAN3/RAB3GAP1/MTM1/STAM/SEPTIN7/MDM1/ATMIN/TRIM37/TSG101/CEP76/SDCCAG8/DYNC2LI1/CDK5RAP2/IFT88/PIP4K2C/MAPK9/BBS4/PIP4K2B/TAPT1/NUMA1/BRCA1/CDKL5/SEC22B/ASAP1/YAP1/IFT140/MNS1/ELAPOR1/RDX/PRKAA1/PLK4/S…	68
BP	GO:0031570	DNA integrity checkpoint signaling	50/3781	123/18723	1.60952e-07	1.74506e-05	1.41691e-05	GIGYF2/TP53BP1/CLOCK/ATF2/PTPN11/RAD17/FEM1B/ERCC6/TAOK1/SDE2/XPC/ATR/ABRAXAS1/ETAA1/WAC/EIF2AK4/RINT1/MAPK14/TOPBP1/NBN/CRY1/PRKDC/RAD1/BRCC3/CDC5L/TAOK3/MRE11/CUL4A/INTS7/MDC1/MSH2/MAP3K20/USP28/BRCA1/ATM/MDM2/RFWD3/TIMELESS/NEK11/FOXN3/WDR76/CCND1/FANCD2/CDKN1B/DDX39B/SOX4/DNA2/BRIP1/DTL/PLK2	50
BP	GO:0061014	positive regulation of mRNA catabolic process	39/3781	87/18723	1.75007e-07	1.86473e-05	1.51408e-05	GIGYF2/PUM1/DCP1A/METTL14/HNRNPR/CNOT6/CELF1/ROCK1/DHX36/YTHDF3/TNRC6A/PDE12/DCP2/CNOT6L/RC3H2/CNOT1/DIS3/PAN2/CNOT8/PAN3/METTL16/ZC3HAV1/MLH1/RC3H1/TUT7/TNRC6B/ROCK2/CPEB3/FTO/TENT4B/CNOT7/TNRC6C/PATL1/NOCT/TOB1/AGO2/ZFP36L2/RBM24/BTG2	39
BP	GO:0061157	mRNA destabilization	38/3781	84/18723	1.87404e-07	1.96297e-05	1.59385e-05	GIGYF2/PUM1/DCP1A/METTL14/HNRNPR/CNOT6/CELF1/ROCK1/DHX36/YTHDF3/TNRC6A/PDE12/DCP2/CNOT6L/RC3H2/CNOT1/DIS3/PAN2/CNOT8/PAN3/METTL16/MLH1/RC3H1/TUT7/TNRC6B/ROCK2/CPEB3/FTO/TENT4B/CNOT7/TNRC6C/PATL1/NOCT/TOB1/AGO2/ZFP36L2/RBM24/BTG2	38
BP	GO:0033044	regulation of chromosome organization	68/3781	187/18723	1.95328e-07	2.01187e-05	1.63355e-05	WAPL/CUL3/ATRX/TASOR/CTCF/YLPM1/CDC23/SMG1/APC/HNRNPU/ERCC4/DHX36/SLF2/POT1/ANAPC1/TNKS2/TPR/XRCC5/USP7/SENP6/CDC27/ATR/ZNF304/ATF7IP/DCP2/SMG6/SETDB1/TNKS/BECN1/MAPK1/NBN/SLF1/SMC5/EXOSC10/RNF4/CTNNB1/SLX4/XRN1/NEK7/NAF1/TERF1/MPHOSPH8/MRE11/CDK5RAP2/GNL3L/LIG4/MAP3K4/CTC1/RB1/RESF1/TENT4B/PARP1/NUMA1/ZWILCH/ATM/KNTC1/CCT2/DNMT1/BUB3/RAD21/MCM2/AXIN2/MAPT/TOP2A/BUB1B/CENPE/CENPF/PKIB	68
BP	GO:0002244	hematopoietic progenitor cell differentiation	47/3781	114/18723	2.27399e-07	2.30382e-05	1.8706e-05	REST/SIN3A/METTL14/ATF2/ITCH/DHX36/AP3B1/FNIP1/XRCC5/SOS2/TENT2/NUDT21/ZBTB1/UFL1/CHD2/PRRC2C/ABL1/PRKDC/ADAR/PSEN1/RBM47/SOS1/HSPA9/LIG4/NFE2L2/SIPA1L3/EIF2AK2/ZBTB24/N4BP2L2/BCL2/JAM3/KITLG/MYB/AGPAT5/PUS7/DHTKD1/DNAI4/EML1/SOX4/ESCO2/MLLT3/GATA3/TOP2A/MLF1/INHBA/CITED2/FLT3	47
BP	GO:0042073	intraciliary transport	23/3781	40/18723	2.35207e-07	2.34448e-05	1.90362e-05	IFT81/KIF3B/TTC26/WDR35/TRAF3IP1/WDR19/TTC21B/TTC30B/LCA5/DYNC2H1/TTC30A/CILK1/DYNC2LI1/IFT88/DYNC2I1/BBS12/RPGR/PCM1/SSX2IP/IFT74/IFT140/ARL3/TUB	23
BP	GO:0140694	non-membrane-bounded organelle assembly	115/3781	367/18723	2.39993e-07	2.35422e-05	1.91153e-05	PUM2/STAG2/DDX3X/CLASP2/CNOT6/CEP97/CCP110/HNRNPU/TOGARAM1/VPS4B/KIF3B/INO80/YTHDF3/G3BP2/KPNB1/ALMS1/DHX29/TPR/FARP2/KIF2A/XRCC5/SENP6/STAG1/CENPC/CLASP1/SMC3/HAUS3/EFL1/ATXN2/ABRAXAS1/CNOT6L/CEP44/FASTKD2/ABRAXAS2/CEP120/NCOR1/CNOT1/TNKS/DYNC1H1/HAUS2/KIAA0753/PRKAR1A/CEP192/CEP135/TUBGCP4/SMAD4/CEP295/G3BP1/DDX6/SMC1A/PRRC2C/RNF4/PAN2/CHMP2B/PRKDC/PAN3/NEK7/TMOD3/POGZ/MLH1/RC3H1/WASHC5/ITGB1/M…	115
BP	GO:0150115	cell-substrate junction organization	43/3781	101/18723	2.51606e-07	2.42957e-05	1.97271e-05	CLASP2/PTPN11/ROCK1/SLK/PDPK1/CLASP1/EPB41L5/MACF1/IQGAP1/TSC1/PTPRA/ABL1/FMN1/PIP5K1A/IQSEC1/PTK2/ROCK2/ITGA2/DUSP3/VCL/PEAK1/PTEN/THBS1/SMAD3/BCL2/BCAS3/LAMC1/DST/RAB8B/TESK2/PHLDB2/PIK3R1/FERMT2/SORBS1/SDC4/PTPRK/FN1/TEK/LRP1/LIMCH1/EPHA3/ITGA6/GREM1	43
BP	GO:0006479	protein methylation	66/3781	181/18723	2.61066e-07	2.44453e-05	1.98485e-05	ATRX/SETD2/CTCF/CTR9/ASH1L/SUZ12/RIF1/SIRT1/RNF20/FBXO11/NSD1/CREBBP/RBBP5/PRMT9/GSPT1/ARID4A/PAXIP1/PRDM4/KDM6A/PRMT5/FAM98B/SETD5/KMT2D/ETF1/ZNF304/KMT2E/RTF1/SETDB1/KMT2C/WDR82/KDM3A/SMAD4/KMT5B/RLF/PRMT3/TET2/BCOR/CTNNB1/SETD1B/KMT2A/SETD7/PRDM2/PCMTD2/MECP2/WDR5B/SUPT6H/ETFBKMT/N6AMT1/PAXBP1/NSD2/SNRPD3/RAB3D/TET3/PCMTD1/OGT/NSD3/BRCA1/EZH1/JARID2/DNMT1/ARMT1/MYB/ASH2L/AASS/GATA3/BTG2	66
BP	GO:0008213	protein alkylation	66/3781	181/18723	2.61066e-07	2.44453e-05	1.98485e-05	ATRX/SETD2/CTCF/CTR9/ASH1L/SUZ12/RIF1/SIRT1/RNF20/FBXO11/NSD1/CREBBP/RBBP5/PRMT9/GSPT1/ARID4A/PAXIP1/PRDM4/KDM6A/PRMT5/FAM98B/SETD5/KMT2D/ETF1/ZNF304/KMT2E/RTF1/SETDB1/KMT2C/WDR82/KDM3A/SMAD4/KMT5B/RLF/PRMT3/TET2/BCOR/CTNNB1/SETD1B/KMT2A/SETD7/PRDM2/PCMTD2/MECP2/WDR5B/SUPT6H/ETFBKMT/N6AMT1/PAXBP1/NSD2/SNRPD3/RAB3D/TET3/PCMTD1/OGT/NSD3/BRCA1/EZH1/JARID2/DNMT1/ARMT1/MYB/ASH2L/AASS/GATA3/BTG2	66
BP	GO:0032869	cellular response to insulin stimulus	72/3781	203/18723	2.67952e-07	2.47155e-05	2.0068e-05	PIK3C2A/SP1/APPL1/DENND4C/APC/SIRT1/PTPN11/ZNF106/PHIP/PDPK1/OPA1/GSK3B/SMARCC1/C2CD5/PRKCI/SOGA1/FER/PIK3CA/PTPRA/GAB1/ATP2B1/APPL2/IDE/PRKDC/CYFIP1/USO1/RAB10/NUCKS1/PPAT/EIF4EBP2/OSBPL8/PIP4K2C/EEF2K/YWHAG/STXBP4/WDTC1/CPEB2/EPRS1/PIP4K2B/PARP1/MYO5A/OGT/PTEN/IRS1/SORL1/GCLC/LPIN2/SHC1/IGF1R/GRB2/RPS6KB1/INSR/PDK2/PTPN1/RAB8B/ENPP1/SLC39A14/PIK3R1/XBP1/RAB31/PRKAA1/PIK3R3/TBC1D4/SORBS1/BCAR3/V…	72
BP	GO:0018205	peptidyl-lysine modification	117/3781	376/18723	2.84155e-07	2.55332e-05	2.07319e-05	ATRX/TAF1/SIN3A/SENP1/SETD2/CTCF/CTR9/EP400/HMG20A/EPC2/ASH1L/GTF3C4/CLOCK/SUZ12/ATF2/RIF1/SIRT1/PHF20/KANSL1/DIP2B/NSD1/CREBBP/MSL2/RBBP5/SENP2/EP300/SENP6/ARID4A/PAXIP1/KDM6A/BRPF3/TOPORS/SETD5/RANBP2/KMT2D/ZNF304/KMT2E/MCM3AP/RTF1/KANSL2/SETDB1/USP22/KMT2C/WDR82/PIAS1/TRRAP/GLYR1/KDM3A/KAT6A/ZZZ3/ATP7A/ARNT/SMAD4/KMT5B/ZMPSTE24/KANSL3/RLF/ESCO1/BRD8/SMC5/TET2/HCFC1/BCOR/CTNNB1/SENP7/SETD1B/KMT…	117
BP	GO:0071375	cellular response to peptide hormone stimulus	95/3781	290/18723	2.8508e-07	2.55332e-05	2.07319e-05	CREB1/PIK3C2A/SP1/APPL1/DENND4C/APC/SIRT1/PTPN11/ZNF106/ROCK1/PHIP/PDPK1/MBD5/OPA1/GSK3B/SMARCC1/C2CD5/PRKCI/SOGA1/FER/AHCYL1/PIK3CA/PTPRA/GAB1/ATP2B1/APPL2/IDE/PRKDC/CYFIP1/CDC5L/USO1/RAB10/NUCKS1/PPAT/STAT3/CRK/RAP1B/ADCY6/EIF4EBP2/OSBPL8/PIP4K2C/EEF2K/YWHAG/PTK2/NFE2L2/STXBP4/ROCK2/WDTC1/CPEB2/LEPROT/EPRS1/PIP4K2B/PARP1/NFKB1/MYO5A/OGT/PTEN/IRS1/SORL1/MDM2/GCLC/LPIN2/SHC1/IGF1R/GRB2/RPS6KB1/IN…	95
BP	GO:0035264	multicellular organism growth	52/3781	132/18723	3.01943e-07	2.66573e-05	2.16446e-05	GIGYF2/ATRX/CREB1/NIPBL/CELF1/WDR48/PTPN11/RBBP6/ERCC6/ATRN/PALB2/TNKS2/EP300/MBD5/MTOR/RC3H2/ZMPSTE24/ZFX/GRHL2/PIK3CA/WDR11/SP2/BBS2/RAI1/STAT3/NOTCH2/SOS1/AFG3L2/CTC1/TTC8/SGPL1/WDTC1/FTO/PLS1/FLVCR1/BCL2/STAT5B/CLIC4/SLC25A25/GPAM/GPAT4/HEG1/ARID5B/AR/STIL/SLC1A2/CHD7/GHR/RARA/SLITRK6/ETNK2/EN1	52
BP	GO:0016311	dephosphorylation	127/3781	417/18723	3.35131e-07	2.91706e-05	2.36852e-05	CTDSPL2/BOD1L1/FBXW11/PTPN11/ROCK1/SACM1L/PPP4R2/DLG1/MTOR/GSK3B/ARPP19/PPP1R12A/RPRD1A/SMG6/PPP2R5E/PPP6C/PPM1A/RPRD1B/PPP4R3B/MTMR1/OCRL/CTDSP2/PTPN4/PPTC7/MTMR12/PHLPP2/SLC39A10/PPP3CB/PPP1R15B/MTMR6/SMG7/PPP6R3/LRRC40/TSC1/EYA3/SSH1/PTPRA/HTT/PTPN9/RPAP2/SYNJ1/MTM1/BPNT2/PPP2R5D/PDP2/PTPN12/RNGTT/MINPP1/MTMR9/PPP4R1/BTRC/PRUNE1/PPP2R2A/MTMR4/PTPDC1/YWHAB/DUSP16/SYNJ2/INPP5B/STYX/PTPRF/MGAT5/P…	127
BP	GO:0060560	developmental growth involved in morphogenesis	80/3781	234/18723	3.48779e-07	2.99369e-05	2.43075e-05	SIN3A/ADNP/SPG11/DIP2B/EIF4G2/IMPACT/GSK3B/PAFAH1B1/BMPR2/EIF2AK4/USP9X/GOLGA4/KDM5B/EPB41L5/MED12/MACF1/PPP3CB/IQGAP1/CTNNB1/ABL1/CYFIP1/RAB21/ITGB1/RYK/RAPH1/FMN1/RNF6/NIN/ITSN2/SPAG9/SHTN1/ULK2/RAB11A/SEMA4F/VCL/SIX4/CDKL5/SLC23A2/MED1/SEMA3C/NEDD4L/HSP90AA1/YAP1/SEMA5A/DDR1/SPART/ESR1/SEMA3F/ALCAM/SLIT2/MAPT/SEMA4B/PTPRS/DCLK1/TIAM1/POSTN/LAMB2/WNT3/CYFIP2/MAP1B/SEMA6D/WNT5A/FN1/LRP1/NRCAM/FG…	80
BP	GO:0046854	phosphatidylinositol phosphate biosynthetic process	31/3781	64/18723	3.83978e-07	3.25066e-05	2.6394e-05	PIK3C2A/SMG1/PIK3C3/SOCS4/PIKFYVE/IP6K1/OCRL/FAM126B/PI4KA/PIK3CA/PIK3CB/SYNJ1/EFR3A/BPNT2/SOCS6/SOCS5/PIP5K1A/PIP4K2C/SYNJ2/PIP4K2B/SOCS7/INPP4B/PI4K2B/IMPA1/ATM/BPNT1/IPMK/PIK3R1/PIK3R3/EFR3B/SOCS1	31
BP	GO:1990138	neuron projection extension	63/3781	172/18723	4.02814e-07	3.36404e-05	2.73146e-05	SIN3A/ADNP/SPG11/DIP2B/EIF4G2/IMPACT/GSK3B/PAFAH1B1/BMPR2/EIF2AK4/USP9X/GOLGA4/MACF1/PPP3CB/IQGAP1/CTNNB1/ABL1/CYFIP1/RAB21/ITGB1/RYK/RAPH1/RNF6/ITSN2/SPAG9/SHTN1/ULK2/RAB11A/SEMA4F/VCL/CDKL5/SLC23A2/SEMA3C/NEDD4L/HSP90AA1/SEMA5A/DDR1/SEMA3F/ALCAM/SLIT2/MAPT/SEMA4B/PTPRS/DCLK1/TIAM1/POSTN/LAMB2/WNT3/CYFIP2/MAP1B/SEMA6D/WNT5A/FN1/LRP1/NRCAM/FLRT3/APOE/SLIT3/SYT1/OLFM1/SYT17/SEMA3E/SEMA3B	63
BP	GO:0048675	axon extension	48/3781	120/18723	4.99653e-07	4.11714e-05	3.34294e-05	SIN3A/ADNP/SPG11/DIP2B/EIF4G2/GSK3B/PAFAH1B1/BMPR2/USP9X/GOLGA4/MACF1/PPP3CB/ABL1/CYFIP1/RAB21/ITGB1/RYK/RAPH1/RNF6/SHTN1/ULK2/RAB11A/SEMA4F/VCL/CDKL5/SEMA3C/HSP90AA1/SEMA5A/SEMA3F/ALCAM/SLIT2/MAPT/SEMA4B/PTPRS/DCLK1/LAMB2/WNT3/MAP1B/SEMA6D/WNT5A/FN1/LRP1/NRCAM/APOE/SLIT3/OLFM1/SEMA3E/SEMA3B	48
BP	GO:0061013	regulation of mRNA catabolic process	61/3781	166/18723	5.3729e-07	4.33242e-05	3.51774e-05	GIGYF2/DHX9/PUM1/PUM2/THRAP3/DCP1A/METTL14/HNRNPR/CNOT6/CELF1/ZC3H14/HNRNPU/ROCK1/DHX36/YTHDF3/NBAS/TNRC6A/MTOR/PDE12/DCP2/CNOT6L/RC3H2/FASTKD2/CNOT1/DIS3/MAPK14/FASTKD3/ANGEL2/LARP1/PAN2/CNOT8/PAN3/METTL16/PAIP1/ZC3HAV1/FMR1/FXR1/MLH1/RC3H1/SECISBP2/TUT7/RNASEL/SYNCRIP/TIRAP/MYEF2/TNRC6B/ROCK2/CPEB3/FTO/TENT4B/CNOT7/TNRC6C/PATL1/NOCT/AXIN2/TOB1/AGO2/TRAF5/ZFP36L2/RBM24/BTG2	61
BP	GO:0016574	histone ubiquitination	25/3781	47/18723	5.398e-07	4.33242e-05	3.51774e-05	CTR9/RNF20/TRIP12/UBR5/HUWE1/CDC73/CUL4B/RYBP/UBR2/USP22/WAC/PHC1/BCOR/UBE2E1/TRIM37/DDB1/RNF40/RNF168/RNF2/LEO1/SKP1/OTUB2/PCGF5/DTX3L/BMI1	25
BP	GO:0046488	phosphatidylinositol metabolic process	59/3781	159/18723	5.61422e-07	4.44819e-05	3.61174e-05	PIK3C2A/SMG1/PIK3C3/SOCS4/SACM1L/PIGN/PIKFYVE/MTMR1/IP6K1/OCRL/MTMR12/FAM126B/PI4KA/MTMR6/PIK3CA/PIK3CB/PIGO/SYNJ1/EFR3A/MTM1/BPNT2/SOCS6/SOCS5/PIGB/PIGK/PIP5K1A/CDS1/MTMR9/PIGS/MTMR4/PIP4K2C/SYNJ2/INPP5B/PIGM/MTMR10/LPGAT1/PIGG/PIP4K2B/SOCS7/INPP4B/PI4K2B/PTEN/IMPA1/ATM/BPNT1/LCLAT1/IPMK/PIGV/INPP5F/PGAP1/PIGW/DGKE/PLCD4/PIK3R1/PIK3R3/EFR3B/INPP5J/SOCS1/PDGFRB	59
BP	GO:0006661	phosphatidylinositol biosynthetic process	51/3781	131/18723	5.99559e-07	4.69022e-05	3.80826e-05	PIK3C2A/SMG1/PIK3C3/SOCS4/SACM1L/PIGN/PIKFYVE/MTMR1/IP6K1/OCRL/FAM126B/PI4KA/MTMR6/PIK3CA/PIK3CB/PIGO/SYNJ1/EFR3A/MTM1/BPNT2/SOCS6/SOCS5/PIGB/PIGK/PIP5K1A/CDS1/PIGS/MTMR4/PIP4K2C/SYNJ2/PIGM/PIGG/PIP4K2B/SOCS7/INPP4B/PI4K2B/PTEN/IMPA1/ATM/BPNT1/IPMK/PIGV/INPP5F/PGAP1/PIGW/DGKE/PIK3R1/PIK3R3/EFR3B/INPP5J/SOCS1	51
BP	GO:0072594	establishment of protein localization to organelle	127/3781	422/18723	6.80859e-07	5.18287e-05	4.20826e-05	PIK3R4/TNPO1/NIPBL/IPO11/APPL1/IPO8/NUP98/IPO7/ZFYVE16/NUP58/UBR5/NUP133/GCC2/PEX1/RAB3GAP2/HUWE1/POT1/KPNB1/AP3B1/AP3M1/KPNA1/TPR/KPNA6/VPS41/RANBP2/FAM53C/POM121/SRP72/M6PR/UBE2D3/NUP153/NUP155/NPEPPS/NCOA4/RBM22/MAPK1/TOMM70/MAPK14/MAPK8/VPS13A/IPO9/VPS13D/LMAN1/APPL2/EFCAB7/RAB3GAP1/EDEM1/STAM/NMT1/RANBP6/NUP54/RAB10/GRPEL2/VPS13C/TERF1/SCARB2/NUP188/PSEN1/SUFU/TSG101/TNPO3/STAT3/VPS36/TIMM10…	127
BP	GO:0007409	axonogenesis	126/3781	418/18723	6.84438e-07	5.18287e-05	4.20826e-05	CREB1/SIN3A/ALS2/ADNP/TOP2B/PTPN11/SPG11/DIP2B/EIF4G2/LMTK2/GSK3B/PAFAH1B1/KIF5B/DAG1/USP33/BMPR2/ZDHHC17/ARHGAP35/PAK2/USP9X/SPAST/SMAD4/GOLGA4/TRIO/MACF1/PPP3CB/ABL1/CYFIP1/RAB21/ITGB1/RYK/RAPH1/RAB10/RNF6/PSEN1/TRAK1/NIN/NOTCH2/OPHN1/DOCK7/SHTN1/SOS1/AFG3L2/ULK2/PTK2/TTC8/RPS6KA5/GLI3/RAB11A/NPTN/TRAK2/TCTN1/B3GNT2/SKIL/FBXO45/SEMA4F/VCL/ENAH/MYCBP2/CDKL5/PTEN/NEO1/SEMA3C/SYNGAP1/LLGL1/BCL2/KI…	126
BP	GO:0043434	response to peptide hormone	125/3781	414/18723	6.87694e-07	5.18287e-05	4.20826e-05	CREB1/PIK3C2A/SP1/APPL1/DENND4C/APC/CHUK/SIRT1/PTPN11/ZNF106/ROCK1/PHIP/PDPK1/MBD5/OPA1/MTOR/GSK3B/SMARCC1/DAG1/C2CD5/PRKCI/SOGA1/FER/STXBP3/AHCYL1/IQGAP1/TSC1/PIK3CA/PTPRA/GAB1/ATP2B1/APPL2/CRY1/IDE/KBTBD2/PRKDC/CYFIP1/CDC5L/USO1/RAB10/NUCKS1/VPS13C/PPAT/STAT3/CRK/RAP1B/ADCY6/RNF40/LRP6/EIF4EBP2/OSBPL8/EPM2AIP1/PIP4K2C/EEF2K/YWHAG/PTK2/NFE2L2/ZBED3/STXBP4/ROCK2/WDTC1/CPEB2/LEPROT/EPRS1/PIP4K2B/P…	125
BP	GO:1903313	positive regulation of mRNA metabolic process	47/3781	118/18723	7.56496e-07	5.63271e-05	4.57352e-05	GIGYF2/PUM1/THRAP3/DCP1A/METTL14/NUP98/HNRNPR/CNOT6/CELF1/ROCK1/DHX36/YTHDF3/CDC73/TNRC6A/PDE12/DCP2/CNOT6L/RC3H2/CNOT1/NCBP1/NUDT21/DIS3/PAN2/CNOT8/PAN3/METTL16/ZC3HAV1/RBMXL1/MLH1/RC3H1/TUT7/HSPA8/TNRC6B/ROCK2/CPEB3/FTO/TENT4B/LEO1/CNOT7/TNRC6C/PATL1/NOCT/TOB1/AGO2/ZFP36L2/RBM24/BTG2	47
BP	GO:0050779	RNA destabilization	38/3781	88/18723	8.022e-07	5.81397e-05	4.72069e-05	GIGYF2/PUM1/DCP1A/METTL14/HNRNPR/CNOT6/CELF1/ROCK1/DHX36/YTHDF3/TNRC6A/PDE12/DCP2/CNOT6L/RC3H2/CNOT1/DIS3/PAN2/CNOT8/PAN3/METTL16/MLH1/RC3H1/TUT7/TNRC6B/ROCK2/CPEB3/FTO/TENT4B/CNOT7/TNRC6C/PATL1/NOCT/TOB1/AGO2/ZFP36L2/RBM24/BTG2	38
BP	GO:1901653	cellular response to peptide	111/3781	359/18723	8.04875e-07	5.81397e-05	4.72069e-05	CREB1/PIK3C2A/SP1/APPL1/DENND4C/APC/SIRT1/PTPN11/ZNF106/ROCK1/PHIP/PDPK1/MBD5/OPA1/GSK3B/SMARCC1/C2CD5/PRKCI/SOGA1/FER/AHCYL1/BCL2L11/PIK3CA/PTPRA/GAB1/SNX6/ATP2B1/APPL2/KLF3/IDE/PRKDC/CYFIP1/CDC5L/USO1/RAB10/NUCKS1/PSEN1/PPAT/STAT3/CRK/RAP1B/ADCY6/EIF4EBP2/OSBPL8/PIP4K2C/EEF2K/YWHAG/PTK2/NFE2L2/STXBP4/ROCK2/FOXO3/WDTC1/CPEB2/LEPROT/EPRS1/PIP4K2B/PARP1/NFKB1/MYO5A/BCL2L2/OGT/BACE1/PTEN/IRS1/KLF10…	111
BP	GO:0001701	in utero embryonic development	113/3781	367/18723	8.09063e-07	5.81397e-05	4.72069e-05	CUL3/YTHDC1/SIN3A/CHD8/ALS2/MIB1/SETD2/CTR9/HECTD1/SP3/ATF2/BIRC6/KIDINS220/LATS1/RBBP6/BPTF/PALB2/SEC24C/GABPA/KIFBP/TRAF6/RTF1/CERT1/GGNBP2/CNOT1/PHF6/FBXW8/ATP7A/ARNT/MAPK1/SMAD4/EPB41L5/WDR19/NBN/GRHL2/BCL2L11/SMAD2/NPAT/BCOR/CTNNB1/ADAM10/COPS2/OTUD7B/RPGRIP1L/NMT1/ZMIZ1/ITGB1/ACVR1B/MED21/BMPR1A/C2CD3/ZNF568/NOTCH2/NCOA1/CUL4A/NSRP1/SUPT6H/SLC30A1/LIG4/INPP5B/SEC24D/GLI3/MSH2/TCTN1/RUNDC1/A…	113
BP	GO:0007044	cell-substrate junction assembly	40/3781	95/18723	9.21908e-07	6.54873e-05	5.31729e-05	CLASP2/PTPN11/ROCK1/SLK/PDPK1/CLASP1/EPB41L5/MACF1/IQGAP1/TSC1/PTPRA/ABL1/FMN1/PIP5K1A/PTK2/ROCK2/ITGA2/DUSP3/VCL/PEAK1/PTEN/THBS1/SMAD3/BCL2/BCAS3/LAMC1/DST/TESK2/PHLDB2/FERMT2/SORBS1/SDC4/PTPRK/FN1/TEK/LRP1/LIMCH1/EPHA3/ITGA6/GREM1	40
BP	GO:0006895	Golgi to endosome transport	13/3781	17/18723	9.51625e-07	6.683e-05	5.42631e-05	RAB14/AP1AR/MON2/KLHL20/VPS13A/GBF1/DOP1A/EPS15/VPS13C/KIF16B/SORT1/DOP1B/WIPI1	13
BP	GO:0010390	histone monoubiquitination	18/3781	29/18723	1.02958e-06	7.14925e-05	5.80488e-05	CTR9/RNF20/CDC73/CUL4B/RYBP/WAC/BCOR/UBE2E1/TRIM37/DDB1/RNF40/RNF168/RNF2/LEO1/SKP1/PCGF5/DTX3L/BMI1	18
BP	GO:0043488	regulation of mRNA stability	58/3781	158/18723	1.05095e-06	7.20586e-05	5.85085e-05	GIGYF2/DHX9/PUM1/PUM2/THRAP3/DCP1A/METTL14/HNRNPR/CNOT6/CELF1/ZC3H14/HNRNPU/ROCK1/DHX36/YTHDF3/TNRC6A/MTOR/PDE12/DCP2/CNOT6L/RC3H2/FASTKD2/CNOT1/DIS3/MAPK14/FASTKD3/ANGEL2/LARP1/PAN2/CNOT8/PAN3/METTL16/PAIP1/FMR1/FXR1/MLH1/RC3H1/TUT7/RNASEL/SYNCRIP/TIRAP/MYEF2/TNRC6B/ROCK2/CPEB3/FTO/TENT4B/CNOT7/TNRC6C/PATL1/NOCT/AXIN2/TOB1/AGO2/TRAF5/ZFP36L2/RBM24/BTG2	58
BP	GO:0006623	protein targeting to vacuole	21/3781	37/18723	1.06106e-06	7.20586e-05	5.85085e-05	PIK3R4/ZFYVE16/GCC2/AP3B1/AP3M1/VPS41/M6PR/NCOA4/VPS13A/VPS13D/VPS13C/SCARB2/NEDD4/VPS37A/HSPA8/MON1B/SORT1/GNPTAB/LAMP2/SORL1/SNX16	21
BP	GO:0018394	peptidyl-lysine acetylation	61/3781	169/18723	1.08477e-06	7.28681e-05	5.91658e-05	TAF1/SIN3A/CTCF/EP400/EPC2/GTF3C4/CLOCK/ATF2/SIRT1/PHF20/KANSL1/DIP2B/CREBBP/MSL2/EP300/PAXIP1/BRPF3/SETD5/MCM3AP/KANSL2/USP22/TRRAP/GLYR1/KAT6A/ZZZ3/SMAD4/ZMPSTE24/KANSL3/ESCO1/BRD8/SMC5/HCFC1/KMT2A/TADA1/HAT1/DR1/MECP2/MAP3K7/KAT7/NCOA1/NAA50/NCOA3/PHF20L1/KAT6B/RPS6KA5/JADE3/TADA2B/ACTL6A/MEAF6/YEATS4/OGT/BRCA1/JADE2/MSL1/BRCA2/BMI1/ARRB1/SOX4/PRKAA1/GATA3/PRKAA2	61
BP	GO:0008286	insulin receptor signaling pathway	46/3781	116/18723	1.14394e-06	7.60168e-05	6.17224e-05	PIK3C2A/APPL1/APC/SIRT1/PTPN11/ZNF106/PHIP/OPA1/GSK3B/SMARCC1/C2CD5/SOGA1/FER/PIK3CA/PTPRA/GAB1/IDE/NUCKS1/EIF4EBP2/OSBPL8/PIP4K2C/STXBP4/PIP4K2B/OGT/IRS1/SORL1/SHC1/IGF1R/GRB2/RPS6KB1/INSR/PDK2/PTPN1/ENPP1/SLC39A14/PIK3R1/PRKAA1/PIK3R3/SORBS1/BCAR3/VWA2/SOCS1/SESN3/SREBF1/PDK4/MZB1	46
BP	GO:0051298	centrosome duplication	33/3781	73/18723	1.20245e-06	7.90546e-05	6.4189e-05	CCP110/SIRT1/VPS4B/XPO1/PDCD6IP/ALMS1/CEP44/USP33/CEP120/TMEM67/KIAA0753/CEP192/CEP135/CEP295/CHMP3/CKAP5/CHMP2B/MDM1/SASS6/POC1B/TRIM37/CEP76/C2CD3/CDK5RAP2/NDE1/ROCK2/BRCA1/PKD2/BRCA2/RAB6C/PLK4/STIL/PLK2	33
BP	GO:0007160	cell-matrix adhesion	78/3781	233/18723	1.2467e-06	8.10945e-05	6.58452e-05	NF1/CLASP2/PTPN11/ROCK1/MKLN1/SLK/TRPM7/PDPK1/CLASP1/GSK3B/DAG1/RASA1/ACER2/EPB41L5/MACF1/BCL2L11/IQGAP1/TSC1/PTPRA/CTNNB1/PIK3CB/ABL1/ITGB1/FMN1/PIP5K1A/TIMM10B/PTK2/ITGAV/ROCK2/ITGA2/DUSP3/CASK/UTRN/VCL/PEAK1/PPFIA1/PTEN/THBS1/SMAD3/BCL2/JAM3/BCAS3/RIN2/PKD1/DDR1/ADAM9/CDH13/TESK2/NID1/NPNT/PHLDB2/PIK3R1/NID2/FERMT2/ADAMTS12/SORBS1/SDC4/EMP2/TIAM1/POSTN/ITGB5/VWA2/PTPRK/ITGA3/FN1/TEK/ITGBL1/LRP…	78
BP	GO:0071559	response to transforming growth factor beta	84/3781	256/18723	1.25972e-06	8.10945e-05	6.58452e-05	SMAD5/CREB1/APPL1/RNF111/TGFBRAP1/SIRT1/APAF1/LATS1/ROCK1/LEMD3/CREBBP/EP300/PDPK1/TRIM33/PPM1A/CRKL/USP9X/SMAD4/EPB41L5/ADAM17/SMAD2/SNX6/APPL2/ZMIZ1/BMPR1A/MAP3K7/STAT3/CRK/MTMR4/ZFHX3/PTK2/ZFYVE9/NLK/SMAD1/BCL9L/SPRED2/ROCK2/STRAP/SNX25/SKIL/PARP1/ACVR1/TWSG1/THBS1/PBLD/LDLRAD4/SMAD3/FUT8/SMURF2/HIPK2/SPRED1/ADAM9/IL17RD/NR3C1/NPNT/TGFBR1/YES1/SLC2A10/FERMT2/PDGFD/FBN1/POSTN/ITGB5/ZFP36L2/PTPR…	84
BP	GO:0016571	histone methylation	53/3781	141/18723	1.30936e-06	8.34209e-05	6.77342e-05	ATRX/SETD2/CTCF/CTR9/ASH1L/SUZ12/RIF1/SIRT1/RNF20/NSD1/CREBBP/RBBP5/ARID4A/PAXIP1/PRDM4/KDM6A/PRMT5/SETD5/KMT2D/ZNF304/KMT2E/RTF1/SETDB1/KMT2C/WDR82/KDM3A/SMAD4/KMT5B/RLF/TET2/BCOR/CTNNB1/SETD1B/KMT2A/SETD7/PRDM2/MECP2/WDR5B/SUPT6H/N6AMT1/PAXBP1/NSD2/TET3/OGT/NSD3/BRCA1/EZH1/JARID2/DNMT1/MYB/ASH2L/AASS/GATA3	53
BP	GO:0043487	regulation of RNA stability	61/3781	170/18723	1.36195e-06	8.58861e-05	6.97359e-05	GIGYF2/DHX9/PUM1/PUM2/THRAP3/DCP1A/METTL14/HNRNPR/CNOT6/CELF1/ZC3H14/PHAX/HNRNPU/ROCK1/DHX36/YTHDF3/TNRC6A/MTOR/PDE12/DCP2/CNOT6L/RC3H2/FASTKD2/TENT2/CNOT1/DIS3/MAPK14/FASTKD3/ANGEL2/LARP1/PAN2/CNOT8/PAN3/METTL16/PAIP1/FMR1/FXR1/MLH1/RC3H1/NAF1/TUT7/RNASEL/SYNCRIP/TIRAP/MYEF2/TNRC6B/ROCK2/CPEB3/FTO/TENT4B/CNOT7/TNRC6C/PATL1/NOCT/AXIN2/TOB1/AGO2/TRAF5/ZFP36L2/RBM24/BTG2	61
BP	GO:0006417	regulation of translation	137/3781	468/18723	1.377e-06	8.59584e-05	6.97945e-05	GIGYF2/DHX9/PUM1/PUM2/DCP1A/METTL14/GEMIN5/IREB2/DDX3X/HNRNPR/CNOT6/CELF1/LTN1/CAPRIN1/LARP4/NEMF/ROCK1/DHX36/UHMK1/EIF4G2/YTHDF3/DNAJC24/IMPACT/GSPT1/DHX29/TPR/TNRC6A/MTOR/PDE12/NSUN3/ETF1/ATXN2/DCP2/CNOT6L/EIF4G3/RC3H2/FASTKD2/EIF4E/LRPPRC/EIF2AK4/CNOT1/MTPN/NCBP1/USP16/DIS3/MAPK1/FASTKD3/ZCCHC4/GCN1/DDX6/PPP1R15B/TSC1/LARP1/PAN2/AGO1/EIF4B/PAIP2/CNOT8/SEPSECS/PRKDC/EIF5/PAN3/METTL16/PAIP1/MRPS…	137
BP	GO:1903829	positive regulation of cellular protein localization	89/3781	276/18723	1.41755e-06	8.753e-05	7.10706e-05	APC/CNST/UBR5/HUWE1/TPR/DLG1/PDPK1/GSK3B/KIF5B/RAB11FIP2/C2CD5/PRKCI/UBE2D3/CD2AP/NPEPPS/RBM22/MAPK1/MAPK14/MAPK8/EPB41/IQGAP1/AP2B1/TCAF1/NMD3/SSH1/TM9SF4/EFCAB7/PTPN9/ATP2C1/NMT1/ITGB1/LRIG2/PSEN1/TSG101/KAT7/GNL3L/EIF2AK3/IPO5/GLI3/ECT2/RAB11A/NPTN/ROCK2/SPTBN1/SLC5A3/LEPROT/ACSL3/MAVS/ABHD17B/PLS1/PARP1/NUMA1/GPD1L/CENPQ/SORL1/CCT2/SMAD3/DTX3L/YAP1/ANK3/PRKCE/ATP2B4/TFRC/ERBB4/MAP1A/RDX/PIK3R…	89
BP	GO:0042176	regulation of protein catabolic process	118/3781	391/18723	1.4332e-06	8.753e-05	7.10706e-05	TAF1/CSNK1A1/HECTD1/USP8/APC/RNF41/UBE3A/ITCH/ZYG11B/SOCS4/LATS1/ROCK1/MARCHF7/XPO1/TRIM32/ANKIB1/UBQLN1/HUWE1/TMTC3/USP7/UBE2K/GSK3B/SMARCC1/RYBP/TMF1/ARIH1/UBQLN2/RCHY1/WAC/PIAS1/FBXW8/RAD23B/UFL1/HMGCR/BAG5/VGLL4/IDE/FBXL5/RNF14/AREL1/PSME3/FMR1/USP19/LRIG2/RGP1/SOCS5/PSEN1/SUFU/DDB1/OPHN1/RIC1/HACE1/NDFIP1/BTRC/RNF40/BBS7/NEDD4/WWP1/MAPK9/AZIN1/NSF/STYX/PTK2/SH3D19/NFE2L2/USP14/RNF139/PSMC1/S…	118
BP	GO:1902903	regulation of supramolecular fiber organization	116/3781	383/18723	1.44467e-06	8.753e-05	7.10706e-05	APC/CLASP2/GMFB/TOGARAM1/WASL/LATS1/ROCK1/TWF1/AP1AR/TAOK1/ALMS1/RICTOR/DLG1/MTOR/CLASP1/ARFGEF1/NCKAP1/CAPZA2/RASA1/CAMSAP1/ABI2/ARFIP1/ARHGAP35/AKAP9/MTPN/DYRK1A/PAK2/TTBK2/FER/SPAST/SMAD4/DCTN1/SLAIN2/TSC1/CKAP5/SSH1/PIK3CA/CAMSAP2/ABL1/CLIP1/ADD1/CYFIP1/EPS8/TMOD3/JMY/WASHC5/SPTAN1/MECP2/FMN1/SPIRE1/TJP1/PSEN1/OCLN/NIN/ATXN7/ACTR2/CDK5RAP2/AKAP13/PRUNE1/HSPA8/LIMA1/TTC8/HDGFL3/RB1/ROCK2/SPTBN…	116
BP	GO:0007224	smoothened signaling pathway	52/3781	138/18723	1.50574e-06	9.03444e-05	7.33558e-05	RO60/HIPK1/IFT81/TTC26/CREBBP/ARL13B/KIAA0586/MOSMO/INTU/SEPTIN2/TTBK2/DLG5/TCTN2/FBXL17/WDR19/CTNNA1/TCTN3/WDR11/PDCL/TTC21B/RPGRIP1L/CDON/DYNC2H1/TBC1D32/SUFU/C2CD3/BTRC/BBS7/CC2D2A/ARMC9/GLI3/NDST1/RB1/TCTN1/TULP3/STK36/HHAT/EVC/GORAB/CHSY1/IFT140/ARL3/HIPK2/ENPP1/KCTD6/FOXA1/STIL/DCDC2/FGFR2/PRKACB/GPC3/FGF10	52
BP	GO:0031124	mRNA 3'-end processing	29/3781	62/18723	2.24079e-06	0.000133052	0.000108033	CCNT1/YTHDC1/CTR9/SCAF8/CPSF6/ZC3H14/RNF20/DHX36/PAPOLA/CDC73/PAPOLG/RPRD1A/CPSF2/RPRD1B/TENT2/NCBP1/NUDT21/LSM11/AHCYL1/RPRD2/VIRMA/PCF11/CSTF2T/CSTF2/RNF40/CPEB3/TENT4B/LEO1/BARD1	29
BP	GO:0001655	urogenital system development	104/3781	338/18723	2.2606e-06	0.000133052	0.000108033	SMAD5/NIPBL/NF1/UBE3A/APAF1/NUP133/FEM1B/ZBTB14/PTCD2/DLG1/TRAF3IP1/SMARCC1/NUP160/CRKL/GZF1/SMAD4/DLG5/ZMPSTE24/CEP290/BCL2L11/IQGAP1/AP2B1/TSC1/SMAD2/CTNNB1/ASXL1/PBX1/FRS2/RPGRIP1L/DYNC2H1/TBC1D32/FMN1/PPAT/NOTCH2/IFT88/TMED10/CC2D2A/SMAD1/TTC8/GLI3/SGPL1/RRM2B/NUP107/SIX4/DCHS1/PKD2/CNTRL/PTEN/CAT/AHI1/SMAD3/BCL2/TIPARP/YAP1/PKD1/KANK2/ARL3/ERBB4/WFS1/ESR1/CDKN1B/NID1/NPNT/TGFBR1/GREB1L/SOX4/…	104
BP	GO:0034968	histone lysine methylation	45/3781	115/18723	2.28741e-06	0.00013336	0.000108283	ATRX/SETD2/CTR9/ASH1L/SUZ12/RIF1/SIRT1/NSD1/RBBP5/ARID4A/PAXIP1/KDM6A/SETD5/KMT2D/ZNF304/KMT2E/RTF1/SETDB1/KMT2C/WDR82/KDM3A/SMAD4/KMT5B/RLF/TET2/BCOR/CTNNB1/SETD1B/KMT2A/SETD7/MECP2/WDR5B/SUPT6H/N6AMT1/NSD2/TET3/OGT/NSD3/BRCA1/EZH1/JARID2/DNMT1/MYB/ASH2L/GATA3	45
BP	GO:0000288	nuclear-transcribed mRNA catabolic process, deadenylation-dependent decay	27/3781	56/18723	2.3982e-06	0.000138513	0.000112467	DCP1A/CNOT6/DHX36/TNRC6A/PDE12/DCP2/CNOT6L/RC3H2/CNOT1/DIS3/PAN2/CNOT8/PAN3/MLH1/RC3H1/TUT7/TNRC6B/CPEB3/TENT4B/CNOT7/TNRC6C/PATL1/NOCT/TOB1/AGO2/ZFP36L2/BTG2	27
BP	GO:0032868	response to insulin	85/3781	264/18723	2.59122e-06	0.000148276	0.000120393	PIK3C2A/SP1/APPL1/DENND4C/APC/SIRT1/PTPN11/ZNF106/PHIP/PDPK1/OPA1/MTOR/GSK3B/SMARCC1/C2CD5/PRKCI/SOGA1/FER/STXBP3/TSC1/PIK3CA/PTPRA/GAB1/ATP2B1/APPL2/CRY1/IDE/KBTBD2/PRKDC/CYFIP1/USO1/RAB10/NUCKS1/VPS13C/PPAT/EIF4EBP2/OSBPL8/EPM2AIP1/PIP4K2C/EEF2K/YWHAG/ZBED3/STXBP4/WDTC1/CPEB2/EPRS1/PIP4K2B/PARP1/SORT1/MYO5A/OGT/PTEN/IRS1/SORL1/GCLC/CAT/LPIN2/SHC1/IGF1R/GRB2/RPS6KB1/INSR/PDK2/CRY2/PTPN1/RAB8B/EN…	85
BP	GO:0000910	cytokinesis	61/3781	173/18723	2.64412e-06	0.000149914	0.000121724	PIK3R4/CUL3/SON/SETD2/PRPF40A/USP8/APC/PKN2/CCP110/BIRC6/PIK3C3/VPS4B/ROCK1/KIF3B/PDCD6IP/SEPTIN2/RASA1/BECN1/SPAST/CHMP3/ZFYVE26/CHMP2B/MYH10/PKP4/AHCTF1/WASHC5/KLHL9/SEPTIN7/KIF13A/SPIRE1/SNX18/ACTR2/KIF20B/SEPTIN10/ECT2/RAB11A/BBS4/ROCK2/TTC19/SPTBN1/SNX9/MAP9/SEPTIN8/EFHC1/CKAP2/SEPTIN11/ANK3/PRKCE/ARL3/RACGAP1/BRCA2/RAB11FIP4/SVIL/CDC14A/INCENP/RAB11FIP3/PLK4/E2F7/PLK2/RHOB/TRIM36	61
BP	GO:0072659	protein localization to plasma membrane	90/3781	284/18723	2.80467e-06	0.000157572	0.000127941	PREPL/APPL1/DENND4C/HECTD1/CLASP2/CNST/EXOC5/ROCK1/SLMAP/DLG1/PDPK1/KIF5B/RAB11FIP2/C2CD5/PRKCI/FCHO2/GOLGA4/FAM126B/MACF1/PTPN9/EFR3A/ATP2C1/BBS2/RAPGEF2/BLZF1/ITGB1/KIF13A/RAB10/GOLPH3/PIP5K1A/LRP6/NSF/TTC8/LYPLA1/GOPC/RAB11A/SEC16A/GOLGA7/ROCK2/RAB3D/SEC23A/SPTBN1/VPS35/ACSL3/PLS1/GGA2/MYO5A/CLTC/DCHS1/PPFIA1/BAG4/AFDN/GOLPH3L/IKBKB/TPBG/PKP2/ZDHHC23/ANK3/PIGW/PRKCE/ATP2B4/PPP2R5A/RAB8B/MAP7/M…	90
BP	GO:0010639	negative regulation of organelle organization	106/3781	348/18723	3.0326e-06	0.000168842	0.000137092	WAPL/ATRX/APC/CLASP2/GMFB/CEP97/CCP110/HNRNPU/SMCR8/ERCC4/HUWE1/TWF1/POT1/TAOK1/TNKS2/TPR/OPA1/CLASP1/ARFGEF1/CAPZA2/DCP2/SMG6/CAMSAP1/USP30/TMEM67/TNKS/MTPN/BECN1/DYRK1A/PRKAR1A/PAK2/TTBK2/SMAD4/NBN/NME6/EXOSC10/SSH1/PIK3CA/CAMSAP2/RAD1/ADD1/SLX4/XRN1/MTM1/EPS8/TMOD3/SPTAN1/DNM1L/MDM1/TERF1/TJP1/TRIM37/TOM1L1/ATXN7/OMA1/CDK5RAP2/GNL3L/CTC1/LIMA1/HDGFL3/SPTBN1/CARMIL1/TENT4B/WASF2/SSH2/PARP1/BCL2…	106
BP	GO:0031440	regulation of mRNA 3'-end processing	17/3781	28/18723	3.20282e-06	0.000176727	0.000143495	CCNT1/YTHDC1/CTR9/CPSF6/ZC3H14/RNF20/DHX36/PAPOLA/CDC73/NCBP1/NUDT21/AHCYL1/VIRMA/RNF40/CPEB3/LEO1/BARD1	17
BP	GO:0016573	histone acetylation	55/3781	152/18723	3.28818e-06	0.000178254	0.000144735	TAF1/SIN3A/CTCF/EP400/EPC2/GTF3C4/CLOCK/ATF2/SIRT1/PHF20/KANSL1/CREBBP/MSL2/EP300/PAXIP1/BRPF3/SETD5/MCM3AP/KANSL2/USP22/TRRAP/GLYR1/KAT6A/ZZZ3/SMAD4/ZMPSTE24/KANSL3/BRD8/HCFC1/KMT2A/TADA1/HAT1/DR1/MECP2/MAP3K7/KAT7/NCOA1/NAA50/NCOA3/PHF20L1/KAT6B/RPS6KA5/JADE3/TADA2B/ACTL6A/MEAF6/YEATS4/OGT/BRCA1/JADE2/MSL1/BRCA2/BMI1/ARRB1/GATA3	55
BP	GO:0021915	neural tube development	55/3781	152/18723	3.28818e-06	0.000178254	0.000144735	SEC24B/MIB1/SETD2/HECTD1/NUP133/ARL13B/OPA1/TRAF6/INTU/ARHGAP35/PHACTR4/WDR19/MED12/GRHL2/TSC1/ABL1/RPGRIP1L/SHROOM3/TBC1D32/PSEN1/SUFU/C2CD3/BRD2/LUZP1/ATP6AP2/CC2D2A/KIF20B/GLI3/BBS4/TCTN1/TULP3/STK4/DCHS1/PKD2/CELSR1/SEMA3C/GORAB/STK3/IFT140/PKD1/BMI1/SOX4/FZD3/SDC4/FOXA1/FZD6/STIL/LRP2/WNT5A/CITED2/TGFB2/RARA/COBL/EN1/PRKACB	55
BP	GO:0045787	positive regulation of cell cycle	97/3781	313/18723	3.47837e-06	0.000186924	0.000151775	CCNT1/CUL3/ATRX/SIN3A/CDC23/DDX3X/PKN2/PTPN11/HNRNPU/UBXN2B/YTHDC2/SRPK2/VPS4B/KIF3B/TRIM32/INO80/SLF2/CDC73/PGGT1B/ANKRD17/PHIP/TPR/KLHL18/CDC27/PAFAH1B1/KMT2E/CCNT2/USP22/EIF4E/CEP120/C6orf89/DYNC1H1/BECN1/SPAST/LSM11/CEP295/ADAM17/BCL2L11/SLF1/CHMP3/SMC5/HCFC1/ABL1/PBX1/PKP4/CCNK/TMOD3/USP19/MECP2/CUL4A/LRP6/DYNLT3/KIF20B/ECT2/STXBP4/RAB11A/RB1/ROCK2/DUSP3/MAP3K20/NUDT16/NUMA1/RPTOR/PKD2/MED1/…	97
BP	GO:0006475	internal protein amino acid acetylation	57/3781	160/18723	3.851e-06	0.000205165	0.000166586	TAF1/SIN3A/CTCF/EP400/EPC2/GTF3C4/CLOCK/ATF2/SIRT1/PHF20/KANSL1/CREBBP/MSL2/EP300/PAXIP1/BRPF3/SETD5/MCM3AP/KANSL2/USP22/TRRAP/GLYR1/KAT6A/ZZZ3/SMAD4/ZMPSTE24/KANSL3/BRD8/SMC5/HCFC1/KMT2A/TADA1/HAT1/DR1/MECP2/MAP3K7/KAT7/NCOA1/NAA50/NCOA3/PHF20L1/KAT6B/RPS6KA5/JADE3/TADA2B/ACTL6A/MEAF6/YEATS4/OGT/BRCA1/JADE2/MSL1/BRCA2/BMI1/ARRB1/GATA3/MAPT	57
BP	GO:0031647	regulation of protein stability	93/3781	298/18723	3.96809e-06	0.00020782	0.000168741	CUL3/TAF1/CREB1/USP47/USP8/FBXW11/SIRT1/PRKRA/MARCHF7/TRIM44/CREBBP/CDC73/SENP2/EP300/USP7/MOSMO/DDI2/HIP1/ATF7IP/USP33/MORC3/USP9X/RABL3/TAF9B/MAPK1/BAG5/TSC1/HCFC1/NAA15/CDKN2AIP/HTT/PRKDC/SEL1L/RAB21/NAA16/USP19/STX12/KRAS/COG3/MTMR9/UTP25/BTRC/GNL3L/NAPG/FBXL3/PEX19/USP3/PTGES3/USP40/CREBL2/NLK/HSPA8/TRIM24/ZBED3/PDCD10/STXBP4/SEC16A/GOLGA7/CMTM6/RNF139/OTUD3/PEX2/GNAQ/VPS35/SAV1/USP28/PARVA/…	93
BP	GO:0048511	rhythmic process	93/3781	298/18723	3.96809e-06	0.00020782	0.000168741	DHX9/CREB1/THRAP3/SIN3A/ADNP/SP1/HNRNPR/CLOCK/FBXW11/CIPC/SIRT1/HNRNPU/UBE3A/KDM5A/CREBBP/HUWE1/TOP1/EP300/USP7/MTOR/GSK3B/PRMT5/SETX/NCOA2/NCOR1/DYRK1A/USP9X/NRIP1/MAPK8/KDM5B/FBXL17/BTBD9/CRY1/KMT2A/PRKDC/NR1D2/DNM1L/RAI1/SRRD/DDB1/NCOA1/KDM2A/CUL4A/BTRC/FBXL3/PER2/MAPK9/ZFHX3/NFYA/NUDT12/ENOX2/SGPL1/ARNTL/ROCK2/FOXO3/GNAQ/OGT/MYCBP2/PTEN/KLF10/GFPT1/TIMELESS/NCOR2/PER3/PHLPP1/CRY2/STAT5B/ESR1/…	93
BP	GO:0016055	Wnt signaling pathway	129/3781	444/18723	4.21738e-06	0.00021902	0.000177835	CUL3/USP47/CHD8/CSNK1G3/CSNK1A1/CTR9/USP8/DDX3X/APC/CSNK1G1/XIAP/HBP1/FBXW11/SPIN1/USP34/UBR5/LATS1/CDC73/SCYL2/SENP2/KPNA1/WNK1/TNKS2/KLHL12/ZRANB1/HMGXB4/ARL6/GSK3B/RTF1/PPM1A/STRN/TNKS/MAPK14/G3BP1/MED12/MACF1/VGLL4/CTNNB1/ZBTB33/TTC21B/ABL1/RYK/GSKIP/PSEN1/DDB1/DAAM1/TBL1XR1/BCL9/BTRC/DIXDC1/LRP6/ATP6AP2/NLK/BCL9L/ZBED3/GLI3/ARNTL/VANGL1/FOXO3/GNAQ/LEO1/VPS35/STK4/NFKB1/ZNRF3/PKD2/CELSR1/PTEN…	129
BP	GO:0007030	Golgi organization	56/3781	157/18723	4.46668e-06	0.000227922	0.000185063	CSNK1A1/TRAPPC8/TRAPPC11/CLASP2/RBSN/UBXN2B/TRIP11/GCC2/HOOK1/HUWE1/GOLGB1/SEC23IP/CLASP1/ARFGEF1/PRMT5/LYSMD3/AKAP9/FBXW8/COG2/STX17/MAPK1/RAB33B/BAG5/GBF1/LMAN1/TMED7/HTT/CAMSAP2/YIPF5/DYNC2H1/USO1/BLZF1/DYM/GOLPH3/ATP8B1/COG3/TMED5/HACE1/VCPIP1/VAMP4/TMED10/PDCD10/GOLGA5/ATL3/SEC16A/COG1/ZFP69B/PI4K2B/SEC22B/GOLPH3L/BCAS3/RAB30/FHDC1/ARHGAP21/MYO18A/ATP8B2	56
BP	GO:0070646	protein modification by small protein removal	56/3781	157/18723	4.46668e-06	0.000227922	0.000185063	USP47/SENP1/USP37/USP8/WDR48/ITCH/USP34/USP46/USP38/SENP2/ZRANB1/USP7/SENP6/ABRAXAS1/OTUD4/USP33/USP30/USP22/ABRAXAS2/TRRAP/COPS4/USP16/USP9X/USP24/USP12/USP42/SENP7/USP48/ASXL1/COPS2/OTUD7B/BRCC3/MINDY2/USP19/ATXN7/VCPIP1/MYSM1/USP10/USP3/USP45/USP40/USPL1/USP53/USP14/OTUD3/USP1/USP32/USP28/OTUB2/USP31/USP13/USP54/OTUD6B/USP25/MINDY3/MINDY1	56
BP	GO:0007179	transforming growth factor beta receptor signaling pathway	67/3781	198/18723	4.49943e-06	0.000227922	0.000185063	SMAD5/CREB1/APPL1/RNF111/TGFBRAP1/SIRT1/LATS1/LEMD3/CREBBP/EP300/PDPK1/TRIM33/PPM1A/USP9X/SMAD4/ADAM17/SMAD2/SNX6/APPL2/ZMIZ1/BMPR1A/MAP3K7/STAT3/MTMR4/PTK2/ZFYVE9/NLK/SMAD1/BCL9L/SPRED2/STRAP/SNX25/SKIL/PARP1/ACVR1/TWSG1/THBS1/PBLD/LDLRAD4/SMAD3/FUT8/SMURF2/HIPK2/SPRED1/ADAM9/IL17RD/NPNT/TGFBR1/SLC2A10/FERMT2/FBN1/ITGB5/PTPRK/ITGA3/CD109/CITED2/LTBP2/TGFB3/TGFB2/DKK3/ZNF703/LOX/COL3A1/COL1A2/TGF…	67
BP	GO:0043967	histone H4 acetylation	30/3781	67/18723	4.61842e-06	0.000232047	0.000188413	EP400/ATF2/SIRT1/PHF20/KANSL1/MSL2/EP300/KANSL2/USP22/TRRAP/ZZZ3/ZMPSTE24/KANSL3/BRD8/HCFC1/KMT2A/HAT1/KAT7/NCOA1/NAA50/JADE3/ACTL6A/MEAF6/YEATS4/OGT/BRCA1/JADE2/MSL1/BRCA2/ARRB1	30
BP	GO:0034976	response to endoplasmic reticulum stress	82/3781	256/18723	4.82169e-06	0.000240307	0.000195119	DDX3X/SIRT1/MARCHF6/ATF6/QRICH1/UBE4A/UBQLN1/MBTPS2/TMTC3/EP300/DNAJB14/UBE2K/OPA1/GSK3B/UBXN4/FAF2/ATP2A2/UBQLN2/CERT1/TMX1/EIF2AK4/RHBDD1/TMEM67/UFL1/EDEM3/ECPAS/BCL2L11/PPP1R15B/SERINC3/ERLIN1/UGGT1/TMEM33/SEL1L/UBE4B/EDEM1/USP19/JKAMP/CANX/UGGT2/STT3B/LPCAT3/EIF2S1/ERLEC1/MBTPS1/TMBIM6/FAM8A1/EIF2AK3/VAPB/DNAJC10/NFE2L2/ERLIN2/ERMP1/SEC16A/USP14/RNF139/EIF2AK2/ITPR1/TMTC4/USP13/CCDC47/THBS1/S…	82
BP	GO:0034063	stress granule assembly	16/3781	26/18723	4.89304e-06	0.000240397	0.000195192	PUM2/DDX3X/YTHDF3/G3BP2/ATXN2/DYNC1H1/G3BP1/DDX6/PRRC2C/EIF2S1/UBAP2L/CSDE1/ATXN2L/PRKAA1/MAPT/PRKAA2	16
BP	GO:0006260	DNA replication	83/3781	260/18723	4.90129e-06	0.000240397	0.000195192	DHX9/WAPL/ATRX/RFC1/SIN3A/PDS5A/USP37/BOD1L1/POLK/RAD17/ATF1/SRPK2/RBBP6/SUPT16H/PRIMPOL/INO80/ORC4/ANKRD17/SDE2/FANCM/TOP1/ORC2/BRPF3/RBBP4/ATR/SMC3/REV1/POLA1/ETAA1/RECQL/EXD2/NOC3L/ZMPSTE24/TOPBP1/NBN/ESCO1/RRM1/ZBTB38/RMI1/MCM9/SLX4/WRN/PURA/LIG3/NUCKS1/PRIM1/TERF1/POLI/DDX21/DDX23/RPA1/MRE11/KAT7/REV3L/TNFAIP1/LIG4/MCMBP/CTC1/RRM2B/RFC5/ORC3/MAP2K4/WDHD1/HELB/BAZ1A/RFWD3/ATAD5/TIMELESS/POLD3…	83
BP	GO:0048041	focal adhesion assembly	36/3781	87/18723	5.148e-06	0.000250115	0.000203083	CLASP2/PTPN11/ROCK1/SLK/PDPK1/CLASP1/EPB41L5/MACF1/IQGAP1/TSC1/PTPRA/ABL1/FMN1/PIP5K1A/PTK2/ROCK2/ITGA2/DUSP3/VCL/PEAK1/PTEN/THBS1/SMAD3/BCL2/BCAS3/TESK2/PHLDB2/FERMT2/SORBS1/SDC4/PTPRK/TEK/LRP1/LIMCH1/EPHA3/GREM1	36
BP	GO:0051168	nuclear export	55/3781	154/18723	5.18038e-06	0.000250115	0.000203083	DHX9/YTHDC1/SETD2/CTDSPL2/SMG1/CPSF6/PHAX/PTPN11/NEMF/NUP133/XPO1/THOC2/UHMK1/TPR/GSK3B/NOP9/MCM3AP/SMG6/POM121/XPO4/NUP160/NCBP1/NUP153/NUP155/WASHC4/RBM22/FYTTD1/AHCYL1/SMG7/NMD3/TSC1/DNAJC27/GLE1/LSG1/SDAD1/NUP188/ABCE1/AKAP13/SUPT6H/HSPA9/DUSP16/STYX/NUP42/XPO7/UPF2/NUP107/BARD1/ATXN1/MDM2/CSE1L/XPOT/PKD1/DDX39B/PTPN14/RANBP3L	55
BP	GO:0198738	cell-cell signaling by wnt	129/3781	446/18723	5.40042e-06	0.000258718	0.000210068	CUL3/USP47/CHD8/CSNK1G3/CSNK1A1/CTR9/USP8/DDX3X/APC/CSNK1G1/XIAP/HBP1/FBXW11/SPIN1/USP34/UBR5/LATS1/CDC73/SCYL2/SENP2/KPNA1/WNK1/TNKS2/KLHL12/ZRANB1/HMGXB4/ARL6/GSK3B/RTF1/PPM1A/STRN/TNKS/MAPK14/G3BP1/MED12/MACF1/VGLL4/CTNNB1/ZBTB33/TTC21B/ABL1/RYK/GSKIP/PSEN1/DDB1/DAAM1/TBL1XR1/BCL9/BTRC/DIXDC1/LRP6/ATP6AP2/NLK/BCL9L/ZBED3/GLI3/ARNTL/VANGL1/FOXO3/GNAQ/LEO1/VPS35/STK4/NFKB1/ZNRF3/PKD2/CELSR1/PTEN…	129
BP	GO:0018393	internal peptidyl-lysine acetylation	56/3781	158/18723	5.57258e-06	0.000264441	0.000214715	TAF1/SIN3A/CTCF/EP400/EPC2/GTF3C4/CLOCK/ATF2/SIRT1/PHF20/KANSL1/CREBBP/MSL2/EP300/PAXIP1/BRPF3/SETD5/MCM3AP/KANSL2/USP22/TRRAP/GLYR1/KAT6A/ZZZ3/SMAD4/ZMPSTE24/KANSL3/BRD8/SMC5/HCFC1/KMT2A/TADA1/HAT1/DR1/MECP2/MAP3K7/KAT7/NCOA1/NAA50/NCOA3/PHF20L1/KAT6B/RPS6KA5/JADE3/TADA2B/ACTL6A/MEAF6/YEATS4/OGT/BRCA1/JADE2/MSL1/BRCA2/BMI1/ARRB1/GATA3	56
BP	GO:0008654	phospholipid biosynthetic process	81/3781	253/18723	5.60547e-06	0.000264441	0.000214715	PIK3C2A/SMG1/PIK3C3/SOCS4/SACM1L/PIGN/PIKFYVE/MTMR1/IP6K1/FAR1/OCRL/FAM126B/PI4KA/SELENOI/MTMR6/SERINC1/PIK3CA/PIK3CB/PIGO/ETNK1/SYNJ1/EFR3A/CEPT1/MTM1/BPNT2/SLC44A1/SOCS6/SOCS5/PIGB/PIGK/LPCAT3/PIP5K1A/CDS1/PIGS/SAMD8/MTMR4/PIP4K2C/SYNJ2/CDS2/FITM2/PIGM/SERINC5/LPGAT1/PIGG/ACSL3/PIP4K2B/SOCS7/INPP4B/PI4K2B/PTEN/IMPA1/ATM/SPTLC2/HMGCS1/BPNT1/LCLAT1/IPMK/PIGV/INPP5F/PGAP1/AGPAT5/PIGW/MBOAT1/GPAM/A…	81
BP	GO:0043001	Golgi to plasma membrane protein transport	21/3781	40/18723	5.74536e-06	0.00026734	0.000217068	PREPL/CNST/GOLGA4/MACF1/ATP2C1/BBS2/BLZF1/KIF13A/RAB10/GOLPH3/NSF/LYPLA1/GOPC/SEC16A/GOLGA7/SPTBN1/ACSL3/GGA2/GOLPH3L/ANK3/RAB31	21
BP	GO:0032508	DNA duplex unwinding	35/3781	84/18723	5.75343e-06	0.00026734	0.000217068	DHX9/SMARCAD1/ATRX/CHD8/DDX3X/DHX36/CHD6/POT1/FANCM/XRCC5/SETX/RECQL/CHD1/G3BP1/NBN/CHD2/CHD9/MCM9/WRN/RAD54L2/PURA/RPA1/MRE11/ASCC3/CHD3/RFC5/HELB/MCM2/RFC3/DNA2/NAV2/TOP2A/BRIP1/MCM4/CHD7	35
BP	GO:0006470	protein dephosphorylation	88/3781	281/18723	6.10997e-06	0.000278521	0.000226147	CTDSPL2/BOD1L1/FBXW11/PTPN11/ROCK1/PPP4R2/DLG1/MTOR/GSK3B/ARPP19/PPP1R12A/RPRD1A/PPP2R5E/PPP6C/PPM1A/RPRD1B/PPP4R3B/MTMR1/CTDSP2/PTPN4/PPTC7/PHLPP2/SLC39A10/PPP3CB/PPP1R15B/MTMR6/PPP6R3/LRRC40/TSC1/EYA3/SSH1/PTPRA/HTT/PTPN9/RPAP2/MTM1/PPP2R5D/PDP2/PTPN12/RNGTT/MINPP1/PPP4R1/BTRC/PPP2R2A/MTMR4/PTPDC1/YWHAB/STYX/PTPRF/MGAT5/PTPN13/PPP1R2/ROCK2/DUSP3/CTDSPL/SSH2/PTPRG/PTP4A2/PTEN/PTPN3/CTTNBP2NL/NUA…	88
BP	GO:0072666	establishment of protein localization to vacuole	24/3781	49/18723	6.11602e-06	0.000278521	0.000226147	PIK3R4/ZFYVE16/GCC2/AP3B1/AP3M1/VPS41/M6PR/NCOA4/VPS13A/VPS13D/STAM/VPS13C/SCARB2/VPS36/NEDD4/VPS37A/HSPA8/MON1B/SORT1/GNPTAB/LAMP2/SORL1/SNX16/CACNG4	24
BP	GO:0150116	regulation of cell-substrate junction organization	31/3781	71/18723	6.12927e-06	0.000278521	0.000226147	CLASP2/PTPN11/ROCK1/SLK/CLASP1/EPB41L5/MACF1/IQGAP1/TSC1/PTPRA/ABL1/FMN1/IQSEC1/PTK2/ROCK2/DUSP3/VCL/PEAK1/PTEN/THBS1/SMAD3/BCAS3/PHLDB2/PIK3R1/FERMT2/SDC4/TEK/LRP1/LIMCH1/EPHA3/GREM1	31
BP	GO:0001822	kidney development	91/3781	293/18723	6.23256e-06	0.000281147	0.00022828	SMAD5/NIPBL/NF1/APAF1/NUP133/ZBTB14/PTCD2/DLG1/TRAF3IP1/NUP160/GZF1/SMAD4/DLG5/ZMPSTE24/CEP290/BCL2L11/IQGAP1/AP2B1/TSC1/SMAD2/CTNNB1/ASXL1/PBX1/RPGRIP1L/DYNC2H1/TBC1D32/FMN1/PPAT/NOTCH2/IFT88/TMED10/CC2D2A/SMAD1/GLI3/SGPL1/RRM2B/NUP107/SIX4/DCHS1/PKD2/CNTRL/CAT/AHI1/SMAD3/BCL2/TIPARP/YAP1/PKD1/KANK2/ARL3/ERBB4/WFS1/NID1/NPNT/TGFBR1/GREB1L/SOX4/TFAP2A/ARID5B/GATA3/SLIT2/PODXL/SDC4/LGR4/LAMA5/PDGF…	91
BP	GO:0008589	regulation of smoothened signaling pathway	34/3781	81/18723	6.41182e-06	0.000287138	0.000233144	IFT81/CREBBP/MOSMO/INTU/DLG5/FBXL17/CTNNA1/WDR11/PDCL/TTC21B/RPGRIP1L/DYNC2H1/SUFU/C2CD3/BTRC/ARMC9/GLI3/NDST1/RB1/TCTN1/TULP3/STK36/EVC/GORAB/CHSY1/IFT140/ENPP1/KCTD6/FOXA1/DCDC2/FGFR2/PRKACB/GPC3/FGF10	34
BP	GO:0071560	cellular response to transforming growth factor beta stimulus	80/3781	250/18723	6.51665e-06	0.000289733	0.000235251	SMAD5/CREB1/APPL1/RNF111/TGFBRAP1/SIRT1/APAF1/LATS1/LEMD3/CREBBP/EP300/PDPK1/TRIM33/PPM1A/CRKL/USP9X/SMAD4/EPB41L5/ADAM17/SMAD2/SNX6/APPL2/ZMIZ1/BMPR1A/MAP3K7/STAT3/CRK/MTMR4/PTK2/ZFYVE9/NLK/SMAD1/BCL9L/SPRED2/STRAP/SNX25/SKIL/PARP1/ACVR1/TWSG1/THBS1/PBLD/LDLRAD4/SMAD3/FUT8/SMURF2/HIPK2/SPRED1/ADAM9/IL17RD/NR3C1/NPNT/TGFBR1/YES1/SLC2A10/FERMT2/PDGFD/FBN1/POSTN/ITGB5/ZFP36L2/PTPRK/ITGA3/WNT5A/CD10…	80
BP	GO:0006986	response to unfolded protein	50/3781	137/18723	6.82557e-06	0.0003013	0.000244643	ATF6/QRICH1/MBTPS2/EP300/UBXN4/FAF2/RHBDD1/UFL1/EDEM3/BCL2L11/PPP1R15B/TMEM33/EDEM1/JKAMP/KBTBD6/STT3B/EIF2S1/ERLEC1/MBTPS1/TMBIM6/HSPA13/EIF2AK3/HSPA9/CREBRF/ABCB10/VAPB/HSPA4/HSPA8/NFE2L2/ERMP1/EIF2AK2/TM7SF3/TMTC4/THBS1/DNAJC3/TRAM1/HSP90AA1/HSPH1/PTPN1/AMFR/WFS1/CCND1/ERN1/PIK3R1/XBP1/HSPA4L/AGR2/THBS4/HSPB8/HSPA2	50
BP	GO:0035966	response to topologically incorrect protein	56/3781	159/18723	6.92862e-06	0.00030368	0.000246575	CUL3/ATF6/QRICH1/MBTPS2/EP300/DNAJB14/UBXN4/FAF2/RHBDD1/UFL1/EDEM3/BCL2L11/PPP1R15B/UGGT1/TMEM33/EDEM1/JKAMP/UBE2W/KBTBD6/UGGT2/STT3B/EIF2S1/ERLEC1/MBTPS1/TMBIM6/HSPA13/EIF2AK3/HSPA9/CREBRF/ABCB10/VAPB/HSPA4/HSPA8/NFE2L2/ERMP1/KLHL15/EIF2AK2/TM7SF3/TMTC4/THBS1/DNAJC3/TRAM1/HSP90AA1/HSPH1/PTPN1/AMFR/WFS1/CCND1/ERN1/PIK3R1/XBP1/HSPA4L/AGR2/THBS4/HSPB8/HSPA2	56
BP	GO:0046578	regulation of Ras protein signal transduction	64/3781	189/18723	7.09106e-06	0.000308611	0.000250579	CUL3/ALS2/DENND4C/ERBIN/RAF1/ARFGEF2/SCAI/ARFGEF1/ARPP19/RASA1/ARHGAP35/RABL3/GBF1/PIK3CB/DENND4A/ABL1/EPS8/MADD/KBTBD7/ITGB1/KBTBD6/KRAS/ABL2/FBXO8/CRK/RALGPS1/NOTCH2/OPHN1/CBL/IQSEC1/AKAP13/SHOC2/TNFAIP1/RALBP1/SSX2IP/CDC42SE1/ARFGEF3/OGT/SYNGAP1/RALGPS2/STARD13/ARHGEF3/CCDC125/PPP2CB/KITLG/KANK2/ABCA1/ARHGEF28/RDX/ARRB1/PSD3/F2R/HEG1/ARHGAP42/LPAR1/NET1/PDGFRB/ITGA3/TGFB2/FBP1/APOE/COL3A1/F2RL…	64
BP	GO:0070936	protein K48-linked ubiquitination	29/3781	65/18723	7.23013e-06	0.000312463	0.000253707	CUL3/UBE3A/ITCH/MARCHF6/UBR5/FBXO38/TRIM44/TRIM32/UBE2K/TOPORS/UBE2G1/UBE2D3/TTC3/RNF4/UBE2H/KBTBD7/UBE2E1/KBTBD6/RNF6/RFFL/HACE1/BTRC/BIRC2/UBE2Q2/SKP1/NEDD4L/DTX3L/AMFR/RNF152	29
BP	GO:0006650	glycerophospholipid metabolic process	94/3781	306/18723	7.31786e-06	0.000314058	0.000255002	PIK3C2A/SMG1/PIK3C3/SOCS4/SACM1L/PIGN/PIKFYVE/PAFAH1B1/NAPEPLD/MTMR1/IP6K1/FAR1/OCRL/PNPLA8/MTMR12/FAM126B/PI4KA/SELENOI/MTMR6/SERINC3/SERINC1/PIK3CA/PIK3CB/PIGO/ETNK1/SYNJ1/EFR3A/CEPT1/MTM1/BPNT2/SLC44A1/MECP2/SOCS6/SOCS5/PIGB/PIGK/LPCAT3/PIP5K1A/CDS1/MTMR9/PIGS/GDE1/OSBPL8/MTMR4/PIP4K2C/SYNJ2/INPP5B/CDS2/PIGM/SERINC5/MTMR10/LPGAT1/PIGG/ACSL3/PIP4K2B/SOCS7/INPP4B/PI4K2B/PTEN/IMPA1/ATM/BPNT1/LCLA…	94
BP	GO:0032535	regulation of cellular component size	113/3781	383/18723	7.59534e-06	0.000323719	0.000262846	CREB1/SIN3A/ALS2/ADNP/GMFB/LARS1/WASL/LATS1/DIP2B/EIF4G2/TWF1/AP1AR/CLCN3/RICTOR/DLG1/MTOR/GSK3B/ARFGEF1/PAFAH1B1/NCKAP1/CAPZA2/RASA1/ABI2/BMPR2/ARFIP1/ARHGAP35/MTPN/FER/ATP7A/GOLGA4/MACF1/RB1CC1/CHMP3/TSC1/SSH1/PIK3CA/ABL1/ADD1/ANO6/CYFIP1/EPS8/TMOD3/JMY/RAB21/WASHC5/SPTAN1/RYK/FMN1/SPIRE1/RNF6/HP1BP3/ACTR2/SHTN1/ULK2/LIMA1/RAB11A/WDTC1/SPTBN1/SNX9/CARMIL1/WASF2/SSH2/PLS1/SEMA4F/RPTOR/CDKL5/VAV2…	113
BP	GO:0006302	double-strand break repair	80/3781	251/18723	7.69637e-06	0.000325778	0.000264518	SMARCAD1/NIPBL/SETD2/TP53BP1/ARID2/WDR48/RIF1/TRIP12/ERCC4/MARF1/UBR5/ERCC6/INO80/SLF2/PPP4R2/PALB2/POT1/FANCM/ACTR8/XRCC5/FAN1/SETX/ABRAXAS1/POLA1/RECQL/EXD2/RNF169/DCLRE1A/KMT5B/SHLD2/NBN/SLF1/SMC5/EYA3/ZFYVE26/RMI1/PRKDC/MCM9/SLX4/BRCC3/WRN/MLH1/SMCHD1/LIG3/NUCKS1/TFIP11/SPIRE1/RPA1/MRE11/ACTR2/REV3L/KDM2A/LIG4/RNF168/NSD2/MSH2/KLHL15/SPIDR/OTUB2/PARP1/BRCA1/FIGNL1/HELB/ATM/RFWD3/UBQLN4/TIMELE…	80
BP	GO:0022411	cellular component disassembly	127/3781	443/18723	1.02226e-05	0.000429765	0.000348951	ARID2/ARID1A/SCAF8/APC/CLASP2/EPG5/SMARCC2/SMCR8/VPS4B/ATG2B/GFM2/DHX8/SUPT16H/UBQLN1/HUWE1/TWF1/TAOK1/GSPT1/KIF2A/CLASP1/GSK3B/SMARCC1/PAFAH1B1/KIF5B/SETX/ETF1/CAPZA2/ATP2A2/CAMSAP1/USP30/RUBCN/AMBRA1/MTPN/BECN1/TTBK2/SPAST/UFL1/STX17/ZMPSTE24/ATG14/ATG9A/VPS13D/RB1CC1/DCTN1/CHMP3/EXOC8/CKAP5/GBF1/DENR/PIK3CA/HTT/CAMSAP2/CHMP2B/FYCO1/CAMKK2/ADAM10/ADD1/SYNJ1/DICER1/EPS8/TMOD3/GLE1/SPTAN1/DNM1L/T…	127
BP	GO:0051893	regulation of focal adhesion assembly	29/3781	66/18723	1.04222e-05	0.000432279	0.000350992	CLASP2/PTPN11/ROCK1/SLK/CLASP1/EPB41L5/MACF1/IQGAP1/TSC1/PTPRA/ABL1/FMN1/PTK2/ROCK2/DUSP3/VCL/PEAK1/PTEN/THBS1/SMAD3/BCAS3/PHLDB2/FERMT2/SDC4/TEK/LRP1/LIMCH1/EPHA3/GREM1	29
BP	GO:0090109	regulation of cell-substrate junction assembly	29/3781	66/18723	1.04222e-05	0.000432279	0.000350992	CLASP2/PTPN11/ROCK1/SLK/CLASP1/EPB41L5/MACF1/IQGAP1/TSC1/PTPRA/ABL1/FMN1/PTK2/ROCK2/DUSP3/VCL/PEAK1/PTEN/THBS1/SMAD3/BCAS3/PHLDB2/FERMT2/SDC4/TEK/LRP1/LIMCH1/EPHA3/GREM1	29
BP	GO:0043244	regulation of protein-containing complex disassembly	45/3781	121/18723	1.1033e-05	0.00045456	0.000369084	SCAF8/APC/CLASP2/SMCR8/TWF1/TAOK1/GSPT1/CLASP1/SETX/ETF1/CAPZA2/CAMSAP1/RUBCN/MTPN/TTBK2/SPAST/ZMPSTE24/PIK3CA/CAMSAP2/FYCO1/ADD1/EPS8/TMOD3/GLE1/SPTAN1/ATXN7/LIMA1/HDGFL3/SPTBN1/CARMIL1/SWAP70/IGF1R/UBQLN4/CKAP2/INSR/CRACD/SEMA5A/SVIL/CALCOCO2/MAP1A/RDX/MAP1B/ADD3/NAV3/BMERB1	45
BP	GO:0000075	cell cycle checkpoint signaling	58/3781	169/18723	1.18331e-05	0.000484297	0.000393228	GIGYF2/TP53BP1/APC/CLOCK/ATF2/PTPN11/RAD17/FEM1B/ERCC6/TAOK1/SDE2/TPR/XPC/ATR/ABRAXAS1/ETAA1/WAC/EIF2AK4/RINT1/MAPK14/TOPBP1/NBN/CRY1/PRKDC/RAD1/BRCC3/CDC5L/TAOK3/MRE11/CUL4A/CDK5RAP2/INTS7/MDC1/MSH2/MAP3K20/USP28/ZWILCH/BRCA1/ATM/KNTC1/MDM2/RFWD3/TIMELESS/BUB3/NEK11/FOXN3/WDR76/CCND1/FANCD2/CDKN1B/DDX39B/SOX4/DNA2/BUB1B/BRIP1/DTL/PLK2/CENPF	58
BP	GO:0061951	establishment of protein localization to plasma membrane	27/3781	60/18723	1.22058e-05	0.000493816	0.000400957	PREPL/CNST/GOLGA4/MACF1/ATP2C1/BBS2/BLZF1/KIF13A/RAB10/GOLPH3/NSF/LYPLA1/GOPC/RAB11A/SEC16A/GOLGA7/SPTBN1/VPS35/ACSL3/GGA2/AFDN/GOLPH3L/ANK3/RAB31/GRIP1/AKAP5/ZDHHC2	27
BP	GO:0046474	glycerophospholipid biosynthetic process	69/3781	211/18723	1.22255e-05	0.000493816	0.000400957	PIK3C2A/SMG1/PIK3C3/SOCS4/SACM1L/PIGN/PIKFYVE/MTMR1/IP6K1/FAR1/OCRL/FAM126B/PI4KA/SELENOI/MTMR6/PIK3CA/PIK3CB/PIGO/ETNK1/SYNJ1/EFR3A/CEPT1/MTM1/BPNT2/SLC44A1/SOCS6/SOCS5/PIGB/PIGK/LPCAT3/PIP5K1A/CDS1/PIGS/MTMR4/PIP4K2C/SYNJ2/CDS2/PIGM/PIGG/ACSL3/PIP4K2B/SOCS7/INPP4B/PI4K2B/PTEN/IMPA1/ATM/BPNT1/LCLAT1/IPMK/PIGV/INPP5F/PGAP1/AGPAT5/PIGW/GPAM/GPAT4/DGKH/DGKE/DGKD/PIK3R1/CHPT1/PIK3R3/EFR3B/INPP5J/SOC…	69
BP	GO:0043624	cellular protein complex disassembly	49/3781	136/18723	1.25824e-05	0.000504929	0.000409981	APC/CLASP2/VPS4B/GFM2/TWF1/TAOK1/GSPT1/KIF2A/CLASP1/ETF1/CAPZA2/CAMSAP1/MTPN/TTBK2/SPAST/CKAP5/PIK3CA/CAMSAP2/ADD1/SYNJ1/EPS8/TMOD3/GLE1/SPTAN1/ATXN7/ABCE1/NSF/HSPA8/LIMA1/HDGFL3/SPTBN1/CARMIL1/KIF24/MICAL2/SWAP70/CKAP2/NCKAP5/CRACD/SEMA5A/NAPB/SVIL/MAP1A/RDX/DNAJC6/MAP1B/ADD3/STMND1/NAV3/BMERB1	49
BP	GO:0072001	renal system development	92/3781	302/18723	1.31622e-05	0.000524791	0.000426108	SMAD5/NIPBL/NF1/APAF1/NUP133/ZBTB14/PTCD2/DLG1/TRAF3IP1/NUP160/GZF1/SMAD4/DLG5/ZMPSTE24/CEP290/BCL2L11/IQGAP1/AP2B1/TSC1/SMAD2/CTNNB1/ASXL1/PBX1/RPGRIP1L/DYNC2H1/TBC1D32/FMN1/PPAT/NOTCH2/IFT88/TMED10/CC2D2A/SMAD1/TTC8/GLI3/SGPL1/RRM2B/NUP107/SIX4/DCHS1/PKD2/CNTRL/CAT/AHI1/SMAD3/BCL2/TIPARP/YAP1/PKD1/KANK2/ARL3/ERBB4/WFS1/NID1/NPNT/TGFBR1/GREB1L/SOX4/TFAP2A/ARID5B/GATA3/SLIT2/PODXL/SDC4/LGR4/LAMA5…	92
BP	GO:0006325	chromatin organization	118/3781	409/18723	1.5144e-05	0.000599936	0.000487122	SMARCAD1/ATRX/PBRM1/CHD8/TASOR/SETD2/SPTY2D1/CTCF/ARID2/ARID1A/HMG20A/SMARCA5/SPIN1/SMARCC2/SIRT1/ARID4B/HNRNPU/ZMYND11/HLTF/KDM5A/BAZ2A/BPTF/SUPT16H/ERCC6/INO80/CHD6/BRD3/RSBN1/ACTR8/TPR/UBN1/TOP1/TLK1/KDM6A/RBL2/SMARCC1/RCBTB1/RBBP4/SETD5/ZNF304/ABRAXAS1/KMT2E/MCM3AP/ATF7IP/LIN54/SHPRH/SETDB1/HCFC2/NCOR1/BAZ1B/KAT6A/UBN2/ZBTB1/KDM5B/PHF2/AEBP2/CHD2/BAZ2B/ARID1B/HCFC1/FAM172A/TSPYL1/PHF8/CHD9/HA…	118
BP	GO:0006903	vesicle targeting	22/3781	45/18723	1.54084e-05	0.000604684	0.000490978	CUL3/CLASP2/TRIP11/GOSR1/AP1AR/KLHL12/CLASP1/EXOC4/EXOC6B/PPP6C/TBC1D23/SNAP23/GBF1/WDR11/EXOC6/PSEN1/FAM91A1/SNAP29/TMED10/C17orf75/CEP19/WIPI1	22
BP	GO:0060999	positive regulation of dendritic spine development	21/3781	42/18723	1.54596e-05	0.000604684	0.000490978	CAPRIN1/DHX36/EIF4G2/OPA1/MTOR/PAFAH1B1/DLG5/FMR1/DNM1L/PSEN1/ACTR2/ITSN1/EEF2K/MAPK6/CPEB3/CDKL5/PPP1R9A/ZMYND8/TIAM1/APOE/NEURL1	21
BP	GO:0051494	negative regulation of cytoskeleton organization	56/3781	163/18723	1.60205e-05	0.000622683	0.000505592	APC/CLASP2/GMFB/TWF1/TAOK1/CLASP1/ARFGEF1/CAPZA2/CAMSAP1/TMEM67/MTPN/DYRK1A/PAK2/TTBK2/SMAD4/SSH1/PIK3CA/CAMSAP2/ADD1/EPS8/TMOD3/SPTAN1/MDM1/TJP1/TRIM37/ATXN7/CDK5RAP2/LIMA1/HDGFL3/SPTBN1/CARMIL1/WASF2/SSH2/BRCA1/PPFIA1/PPP1R9A/SWAP70/CKAP2/FKBP4/CRACD/SVIL/MYADM/PHLDB2/RDX/PIK3R1/RHPN2/SLIT2/TMSB10/FHOD3/SSH3/CGNL1/MAP1B/INPP5J/ADD3/NAV3/BMERB1	56
BP	GO:0016241	regulation of macroautophagy	50/3781	141/18723	1.69932e-05	0.000656363	0.000532939	SMG1/EXOC1/SIRT1/SMCR8/SPTLC1/RAB3GAP2/UBQLN1/MTOR/EXOC4/USP30/UBQLN2/RUBCN/WAC/ATP6V1A/BECN1/EXOC7/MAPK8/VPS13D/TSC1/EXOC8/PIK3CA/SNX6/LARP1/HTT/TBK1/FYCO1/RAB3GAP1/MTM1/VPS26A/VPS13C/MAP3K7/PAFAH1B2/NEDD4/PIP4K2C/ATP6V1C1/SCOC/VPS35/PIP4K2B/ATP6V0A1/SPTLC2/SEC22B/BNIP3L/NPC1/UBQLN4/CALCOCO2/ELAPOR1/ERN1/PRKAA2/SESN3/HSPB8	50
BP	GO:0042147	retrograde transport, endosome to Golgi	36/3781	91/18723	1.71177e-05	0.000657066	0.000533509	PREPL/HEATR5B/ANKFY1/RBSN/TBC1D5/VPS52/GCC2/GOSR1/TBC1D14/USP7/PIKFYVE/HEATR5A/ARFIP1/ERC1/TBC1D23/EVI5/TRAPPC10/DCTN1/GBF1/SNX6/DENND5A/ATP9A/TMEM87B/SNX2/VPS26A/RGP1/RIC1/SPAG9/TMEM87A/VPS35/SNX1/VPS54/CLTC/RHOBTB3/RAB6C/BAIAP3	36
BP	GO:0060998	regulation of dendritic spine development	27/3781	61/18723	1.77079e-05	0.00067138	0.000545132	CAPRIN1/UBE3A/DHX36/EIF4G2/OPA1/MTOR/PAFAH1B1/DLG5/FMR1/DNM1L/PSEN1/ACTR2/ITSN1/EEF2K/MAPK6/CPEB3/CDKL5/PTEN/ASAP1/PPP1R9A/TANC2/ZMYND8/PTPRS/TIAM1/PLK2/APOE/NEURL1	27
BP	GO:1905515	non-motile cilium assembly	27/3781	61/18723	1.77079e-05	0.00067138	0.000545132	TOGARAM1/BBS10/EXOC5/CEP350/ARL13B/INTU/CEP135/CEP290/DCTN1/RPGRIP1L/DYNC2H1/BBS2/SEPTIN7/TBC1D32/ATMIN/PIBF1/C2CD3/IFT88/BBS7/PCM1/CC2D2A/TTC8/BBS4/IFT74/GORAB/IFT140/CEP126	27
BP	GO:1901987	regulation of cell cycle phase transition	113/3781	390/18723	1.85159e-05	0.000697732	0.000566528	GIGYF2/CUL3/TAF1/USP47/SIN3A/TP53BP1/APPL1/CDC23/DDX3X/APC/CLOCK/ATF2/PTPN11/RAD17/VPS4B/FEM1B/ERCC6/INO80/CDC73/TAOK1/ANKRD17/SDE2/TPR/DLG1/PAXIP1/KLHL18/CDC27/RBL2/XPC/ATR/ABRAXAS1/KMT2E/ETAA1/WAC/EIF2AK4/RINT1/CTDSP2/LSM11/MAPK14/TOPBP1/NBN/ADAM17/APPL2/CRY1/PBX1/PRKDC/RAD1/PSME3/ECD/TMOD3/BRCC3/CDC5L/WEE1/MECP2/TAOK3/DDB1/MRE11/APBB2/CUL4A/CDK5RAP2/CTC1/STXBP4/RAB11A/INTS7/RB1/MDC1/MSH2/MAP3K…	113
BP	GO:0071230	cellular response to amino acid stimulus	30/3781	71/18723	1.88831e-05	0.000706473	0.000573626	LARS1/UBR1/OPA1/MTOR/UBR2/ATP7A/CPEB4/LAMTOR3/IPO5/RRAGB/CPEB3/BCL2L2/RPTOR/GCLC/DNMT1/GCLM/SH3BP4/AMIGO1/PDGFC/XBP1/PDGFD/SOCS1/CYBA/COL5A2/SESN3/COL4A6/NTRK2/COL1A2/NEURL1/SIX1	30
BP	GO:0032271	regulation of protein polymerization	74/3781	233/18723	1.89765e-05	0.000706473	0.000573626	GMFB/TOGARAM1/WASL/LATS1/TWF1/AP1AR/RICTOR/DLG1/MTOR/CLASP1/ARFGEF1/NCKAP1/CAPZA2/RASA1/CAMSAP1/ABI2/ARFIP1/AKAP9/MTPN/DYRK1A/FER/DCTN1/SLAIN2/CKAP5/SSH1/CAMSAP2/ABL1/CLIP1/ADD1/CYFIP1/EPS8/TMOD3/JMY/WASHC5/SPTAN1/MECP2/FMN1/SPIRE1/OCLN/NIN/ACTR2/CDK5RAP2/PRUNE1/SPTBN1/SNX9/CARMIL1/WASF2/SSH2/NUMA1/BAG4/PPP1R9A/GRB2/HSP90AA1/FKBP4/PRKCE/CRACD/ARL3/PREX1/SVIL/CDKN1B/MYADM/RDX/SLIT2/MAPT/TMSB10/FHO…	74
BP	GO:0048732	gland development	124/3781	436/18723	1.94526e-05	0.000715676	0.000581098	CUL3/CREB1/NF1/ASH1L/SP3/ATF2/UBE3A/RAF1/LATS1/FEM1B/WDR35/BTBD7/PTCD2/SMARCC1/PRMT5/ARHGAP5/DAG1/SRSF1/ARHGAP35/CRKL/ZBTB1/ATP7A/MAPK1/SMAD4/ZMPSTE24/KDM5B/PHF2/RREB1/PRLR/BCL2L11/RB1CC1/SMAD2/PIK3CA/CTNNB1/ASXL1/ABL1/PBX1/FRS2/PRKDC/RPGRIP1L/GNPNAT1/BMPR1A/KRAS/PSEN1/PPAT/ZDHHC21/NOTCH2/NCOA1/BTRC/SRP54/CTC1/GLI3/UPF2/IGF2R/ITGA2/MAN2A1/TWSG1/SIX4/PKD2/ACADM/PTEN/PTPN3/MED1/HMGCS1/SEMA3C/SMAD3/…	124
BP	GO:0031110	regulation of microtubule polymerization or depolymerization	35/3781	88/18723	1.94553e-05	0.000715676	0.000581098	APC/CLASP2/TOGARAM1/TAOK1/CLASP1/CAMSAP1/AKAP9/DYRK1A/TTBK2/SPAST/DCTN1/SLAIN2/CKAP5/CAMSAP2/ABL1/CLIP1/MECP2/OCLN/NIN/ATXN7/CDK5RAP2/PRUNE1/HDGFL3/NUMA1/CKAP2/FKBP4/ARL3/CDKN1B/MAP1A/MAPT/MAP1B/INPP5J/STMND1/NAV3/BMERB1	35
BP	GO:0060562	epithelial tube morphogenesis	97/3781	325/18723	1.96061e-05	0.000716955	0.000582137	SEC24B/MIB1/SETD2/HECTD1/ARL13B/DLG1/OPA1/TRAF6/DAG1/ARHGAP35/GZF1/SMAD4/DLG5/PHACTR4/KDM5B/CEP290/MED12/GRHL2/TSC1/CTNNB1/ABL1/PBX1/SHROOM3/FMN1/KRAS/PSEN1/SUFU/C2CD3/NOTCH2/BRD2/BTRC/BBS7/LUZP1/CC2D2A/KIF20B/GLI3/BBS4/TCTN1/TULP3/STK4/ACVR1/SIX4/DCHS1/PKD2/CELSR1/MED1/AHI1/MICAL2/SMAD3/BCL2/STK3/STARD13/YAP1/PKD1/CLIC4/DDR1/EDNRA/ESR1/NPNT/GREB1L/SOX4/FZD3/TBX3/GATA3/PGR/ADAMTS12/SLIT2/PODXL/SD…	97
BP	GO:0007623	circadian rhythm	68/3781	210/18723	2.02158e-05	0.000734904	0.00059671	CREB1/THRAP3/SIN3A/HNRNPR/CLOCK/FBXW11/CIPC/SIRT1/HNRNPU/UBE3A/KDM5A/HUWE1/TOP1/EP300/USP7/MTOR/GSK3B/PRMT5/SETX/NCOA2/NCOR1/DYRK1A/USP9X/NRIP1/MAPK8/FBXL17/BTBD9/CRY1/KMT2A/PRKDC/NR1D2/RAI1/SRRD/DDB1/KDM2A/BTRC/FBXL3/PER2/MAPK9/ZFHX3/NUDT12/ARNTL/ROCK2/GNAQ/OGT/MYCBP2/PTEN/KLF10/GFPT1/TIMELESS/PER3/PHLPP1/CRY2/BHLHE40/NOCT/SIAH2/PRKAA1/KLF9/LGR4/TOP2A/PRKAA2/KCND2/ADCY1/SREBF1/NTRK2/SLC6A4/EGR3/…	68
BP	GO:0008333	endosome to lysosome transport	25/3781	55/18723	2.05581e-05	0.000739553	0.000600485	TGFBRAP1/EPG5/VPS4B/HOOK1/SCYL2/HMGXB4/VPS41/M6PR/VPS39/ATG14/CHMP3/ARL8B/CHMP2B/MTM1/SNX27/KIF13A/TSG101/TRAK1/TRAK2/LYST/SORT1/HOOK3/SNX16/DTX3L/RHOB	25
BP	GO:0044772	mitotic cell cycle phase transition	121/3781	424/18723	2.0583e-05	0.000739553	0.000600485	GIGYF2/CUL3/USP47/SIN3A/APPL1/CDC23/USP37/DDX3X/APC/CLASP2/RAD17/VPS4B/LATS1/INO80/CDC73/TAOK1/ANKRD17/ANAPC1/SDE2/GSPT1/TPR/DLG1/CUL5/KLHL18/CUL4B/CDC27/RBL2/CLASP1/XPC/ARPP19/ABRAXAS1/KMT2E/PPP6C/EIF4E/WAC/PIAS1/SPAST/RINT1/CTDSP2/LSM11/TOPBP1/FBXL17/NBN/ADAM17/SMC5/CDK17/NPAT/CCNI/APPL2/TAF2/PBX1/PHF8/PRKDC/CACUL1/PSME3/ECD/EPS8/TMOD3/BRCC3/ITGB1/WEE1/MECP2/ACVR1B/TAOK3/PPAT/DDB1/CUL2/MRE11/CC…	121
BP	GO:0035196	production of miRNAs involved in gene silencing by miRNA	24/3781	52/18723	2.18685e-05	0.000781197	0.000634299	PUM1/PUM2/DDX3X/PRKRA/ZC3H7A/SNIP1/DROSHA/NCOR1/ZMPSTE24/SMAD2/AGO1/DICER1/ADAR/TUT7/AGO4/AGO3/STAT3/SMAD1/SMAD3/ZC3H7B/NCOR2/ESR1/PPP3CA/AGO2	24
BP	GO:0048638	regulation of developmental growth	98/3781	330/18723	2.22579e-05	0.000790539	0.000641883	CREB1/SIN3A/NIPBL/ADNP/CELF1/LATS1/DIP2B/ATRN/EIF4G2/TNKS2/MBD5/MTOR/GSK3B/PAFAH1B1/BMPR2/MAPK1/GOLGA4/ZMPSTE24/MAPK14/MACF1/BCL2L11/VGLL4/PIK3CA/ABL1/PRKDC/CYFIP1/RAB21/BBS2/RYK/RAI1/RNF6/BMPR1A/STAT3/ITSN2/SPAG9/SHTN1/AFG3L2/ULK2/SGPL1/RAB11A/FTO/SAV1/PLS1/STK4/SEMA4F/WWC2/SIX4/FLVCR1/CDKL5/PTEN/SLC23A2/SEMA3C/BCL2/STK3/JARID2/NEDD4L/YAP1/INSR/RUNX1/STAT5B/SEMA5A/SPART/ERBB4/GPAM/GPAT4/CDKN1B/T…	98
BP	GO:0006622	protein targeting to lysosome	14/3781	23/18723	2.33004e-05	0.000822839	0.00066811	ZFYVE16/GCC2/AP3B1/AP3M1/M6PR/NCOA4/SCARB2/NEDD4/HSPA8/SORT1/GNPTAB/LAMP2/SORL1/SNX16	14
BP	GO:0006984	ER-nucleus signaling pathway	22/3781	46/18723	2.39211e-05	0.000839956	0.000682008	ATF6/QRICH1/MBTPS2/GSK3B/ATP2A2/BCL2L11/PPP1R15B/ERLIN1/TMEM33/LPCAT3/EIF2S1/MBTPS1/EIF2AK3/NFE2L2/ERLIN2/SPRING1/CCDC47/PTPN1/AMFR/WFS1/SREBF1/AGR2	22
BP	GO:0016579	protein deubiquitination	49/3781	139/18723	2.45639e-05	0.000857655	0.000696379	USP47/USP37/USP8/WDR48/ITCH/USP34/USP46/USP38/ZRANB1/USP7/ABRAXAS1/OTUD4/USP33/USP30/USP22/ABRAXAS2/TRRAP/USP16/USP9X/USP24/USP12/USP42/USP48/ASXL1/OTUD7B/BRCC3/MINDY2/USP19/ATXN7/VCPIP1/MYSM1/USP10/USP3/USP45/USP40/USP53/USP14/OTUD3/USP1/USP32/USP28/OTUB2/USP31/USP13/USP54/OTUD6B/USP25/MINDY3/MINDY1	49
BP	GO:0032259	methylation	106/3781	364/18723	2.63087e-05	0.000913416	0.000741654	ATRX/PRDM10/SETD2/CTCF/METTL14/CTR9/ASH1L/SUZ12/RIF1/SIRT1/RNF20/ZC3H13/FBXO11/CBLL1/BAZ2A/NSD1/CREBBP/RBBP5/PRMT9/GSPT1/METTL15/ARID4A/PAXIP1/PRDM4/KDM6A/THUMPD3/TRMT61B/PRMT5/FAM98B/NSUN3/SETD5/RNMT/KMT2D/ETF1/ZNF304/KMT2E/ATF7IP/RTF1/SETDB1/MTR/KMT2C/WDR82/KDM3A/CMTR2/SMAD4/KMT5B/ZMPSTE24/ZCCHC4/RLF/GRHL2/TYW3/PRMT3/TET2/CARNMT1/TRMT10A/PIK3CA/BCOR/CTNNB1/SETD1B/KMT2A/TRMT1L/VIRMA/METTL16/SETD…	106
BP	GO:0016358	dendrite development	76/3781	243/18723	2.6723e-05	0.000922614	0.000749123	CAPRIN1/UBE3A/KIDINS220/WASL/DHX36/EIF4G2/OPA1/MTOR/GSK3B/PAFAH1B1/TMEM106B/STRN/ABI2/CRKL/FBXW8/PAK2/DLG5/IQGAP1/CAMSAP2/ADAM10/CYFIP1/RBFOX2/SLC11A2/FMR1/RAB21/RAPGEF2/ITGB1/DNM1L/UBA6/MECP2/PSEN1/TRAK1/CRK/RERE/ACTR2/IQSEC1/NEDD4/ITSN1/EEF2K/MEF2A/BBS4/TRAK2/MAPK6/CPEB3/FARP1/CDKL5/PTEN/ASAP1/PPP1R9A/CELSR2/SYNGAP1/TANC2/ZMYND8/NEDD4L/TPBG/PDLIM5/BTBD3/PRKG1/PREX1/KLF7/MAP1A/PPP3CA/GRIP1/PTPRS…	76
BP	GO:0045786	negative regulation of cell cycle	111/3781	385/18723	2.76055e-05	0.00094114	0.000764166	GIGYF2/WAPL/ATRX/USP47/TP53BP1/IPO7/APC/CLOCK/ATF2/CCP110/PTPN11/RAD17/YTHDC2/LATS1/FEM1B/ERCC6/THAP5/CDC73/TAOK1/SDE2/TPR/DLG1/RBL2/XPC/ATR/ABRAXAS1/ETAA1/WAC/EIF2AK4/TMEM67/TNKS/PRKAR1A/RINT1/CTDSP2/MAPK14/TOPBP1/NBN/ANGEL2/NME6/CTNNB1/CRY1/ABL1/PRKDC/RAD1/BRCC3/CDC5L/MDM1/WEE1/TERF1/TAOK3/TRIM37/TOM1L1/MRE11/APBB2/CUL4A/CDK5RAP2/IPO5/INTS7/INCA1/RB1/MDC1/MSH2/MAP3K20/USP28/CTDSPL/ZWILCH/BRCA1/…	111
BP	GO:0051568	histone H3-K4 methylation	26/3781	59/18723	2.77022e-05	0.00094114	0.000764166	CTR9/ASH1L/RBBP5/ARID4A/PAXIP1/KDM6A/KMT2D/KMT2E/RTF1/KMT2C/WDR82/SMAD4/RLF/TET2/BCOR/CTNNB1/SETD1B/KMT2A/WDR5B/TET3/OGT/BRCA1/DNMT1/MYB/ASH2L/GATA3	26
BP	GO:0051261	protein depolymerization	42/3781	114/18723	2.77164e-05	0.00094114	0.000764166	APC/CLASP2/VPS4B/TWF1/TAOK1/KIF2A/CLASP1/CAPZA2/CAMSAP1/MTPN/TTBK2/SPAST/CKAP5/PIK3CA/CAMSAP2/ADD1/SYNJ1/EPS8/TMOD3/SPTAN1/ATXN7/HSPA8/LIMA1/HDGFL3/SPTBN1/CARMIL1/KIF24/MICAL2/SWAP70/CKAP2/NCKAP5/CRACD/SEMA5A/SVIL/MAP1A/RDX/DNAJC6/MAP1B/ADD3/STMND1/NAV3/BMERB1	42
BP	GO:0033522	histone H2A ubiquitination	15/3781	26/18723	2.90291e-05	0.000980325	0.000795982	TRIP12/UBR5/CUL4B/RYBP/UBR2/BCOR/TRIM37/DDB1/RNF168/RNF2/SKP1/OTUB2/PCGF5/DTX3L/BMI1	15
BP	GO:0051054	positive regulation of DNA metabolic process	65/3781	201/18723	3.18568e-05	0.00106997	0.000868772	DHX9/ATRX/TP53BP1/ARID2/WDR48/RIF1/SIRT1/DHX36/ERCC6/SLF2/POT1/TNKS2/XRCC5/USP7/PAXIP1/ATR/ABRAXAS1/OTUD4/TNKS/USP9X/MAPK1/KMT5B/SHLD2/NBN/GRHL2/SLF1/EYA3/CTNNB1/PRKDC/SLX4/NEK7/BRCC3/WRN/MLH1/NAF1/SMCHD1/MECP2/SPIRE1/MRE11/ACTR2/PTGES3/MAP3K4/RNF168/NSD2/FAM168A/MSH2/RFC5/SPIDR/PARP1/BRCA1/ATM/CCT2/NVL/TIMELESS/HSP90AA1/DTX3L/TFRC/RFC3/DDX39B/TNFSF13/PARP9/PDGFRB/GREM1/PKIB/FGF10	65
BP	GO:0031109	microtubule polymerization or depolymerization	44/3781	122/18723	3.31384e-05	0.001107	0.000898837	APC/CLASP2/TOGARAM1/TAOK1/KIF2A/CLASP1/CAMSAP1/AKAP9/HAUS2/DYRK1A/CEP192/TTBK2/SPAST/TUBGCP4/DCTN1/SLAIN2/CKAP5/CAMSAP2/ABL1/CLIP1/MECP2/OCLN/NIN/ATXN7/CDK5RAP2/PRUNE1/NDE1/TUBGCP5/RANBP9/HDGFL3/NUMA1/KIF24/CKAP2/NCKAP5/FKBP4/ARL3/CDKN1B/MAP1A/MAPT/MAP1B/INPP5J/STMND1/NAV3/BMERB1	44
BP	GO:0000289	nuclear-transcribed mRNA poly(A) tail shortening	16/3781	29/18723	3.35163e-05	0.00111361	0.000904201	CNOT6/TNRC6A/CNOT6L/CNOT1/PAN2/PAN3/MLH1/TUT7/TNRC6B/CPEB3/TENT4B/CNOT7/TNRC6C/TOB1/AGO2/BTG2	16
BP	GO:0010212	response to ionizing radiation	51/3781	148/18723	3.41957e-05	0.0011245	0.000913047	NIPBL/TP53BP1/CLOCK/SIRT1/ERCC6/INO80/XRCC5/PAXIP1/ATR/ABRAXAS1/ZMPSTE24/INIP/MAPK14/TOPBP1/EYA3/RRM1/PRKDC/RAD1/LZIC/BRCC3/WRN/NUCKS1/CBL/LIG4/RNF168/ECT2/INTS7/MSH2/SPIDR/MAP3K20/USP28/PARP1/BRCA1/TLK2/FIGNL1/ATM/MDM2/RFWD3/BCL2/GRB2/ALAD/YAP1/BRCA2/CCND1/FANCD2/XRRA1/PRKAA1/GATA3/NET1/CYBA/RHOB	51
BP	GO:0032392	DNA geometric change	35/3781	90/18723	3.42081e-05	0.0011245	0.000913047	DHX9/SMARCAD1/ATRX/CHD8/DDX3X/DHX36/CHD6/POT1/FANCM/XRCC5/SETX/RECQL/CHD1/G3BP1/NBN/CHD2/CHD9/MCM9/WRN/RAD54L2/PURA/RPA1/MRE11/ASCC3/CHD3/RFC5/HELB/MCM2/RFC3/DNA2/NAV2/TOP2A/BRIP1/MCM4/CHD7	35
BP	GO:0050684	regulation of mRNA processing	48/3781	137/18723	3.5422e-05	0.00115824	0.000940444	CCNT1/DHX9/YTHDC1/REST/HNRNPK/THRAP3/SON/SRSF10/CTR9/NUP98/CELF1/CPSF6/ZC3H14/RNF20/HNRNPU/SRPK2/DHX36/PAPOLA/CDC73/PTCD2/SLTM/RBM23/NCBP1/DYRK1A/NUDT21/AHCYL1/DDX17/FAM172A/VIRMA/RBM25/METTL16/RBM39/RBFOX2/RBMXL1/FMR1/FXR1/RNF40/NSRP1/SUPT6H/HSPA8/CPEB3/LEO1/BARD1/RAVER1/MBNL2/RBM11/RBM24/NOVA1	48
BP	GO:1901532	regulation of hematopoietic progenitor cell differentiation	17/3781	32/18723	3.66472e-05	0.001192	0.000967852	METTL14/ITCH/DHX36/FNIP1/SOS2/NUDT21/ZBTB1/ABL1/PRKDC/SOS1/HSPA9/NFE2L2/EIF2AK2/N4BP2L2/KITLG/MYB/PUS7	17
BP	GO:0006378	mRNA polyadenylation	21/3781	44/18723	3.79616e-05	0.00121913	0.000989878	CCNT1/YTHDC1/CTR9/SCAF8/CPSF6/ZC3H14/RNF20/PAPOLA/CDC73/PAPOLG/CPSF2/TENT2/NUDT21/AHCYL1/VIRMA/PCF11/CSTF2/RNF40/CPEB3/TENT4B/LEO1	21
BP	GO:0032204	regulation of telomere maintenance	32/3781	80/18723	3.8073e-05	0.00121913	0.000989878	ATRX/YLPM1/SMG1/HNRNPU/ERCC4/DHX36/POT1/TNKS2/XRCC5/USP7/ATR/DCP2/SMG6/TNKS/MAPK1/NBN/EXOSC10/CTNNB1/SLX4/XRN1/NEK7/NAF1/TERF1/MRE11/GNL3L/MAP3K4/CTC1/TENT4B/PARP1/ATM/CCT2/PKIB	32
BP	GO:0071229	cellular response to acid chemical	32/3781	80/18723	3.8073e-05	0.00121913	0.000989878	LARS1/UBR1/OPA1/MTOR/UBR2/ATP7A/PIK3CA/CPEB4/LAMTOR3/IPO5/RRAGB/CPEB3/BCL2L2/RPTOR/PKD2/GCLC/DNMT1/GCLM/SH3BP4/AMIGO1/PDGFC/XBP1/PDGFD/SOCS1/CYBA/COL5A2/SESN3/COL4A6/NTRK2/COL1A2/NEURL1/SIX1	32
BP	GO:0006282	regulation of DNA repair	46/3781	130/18723	3.85374e-05	0.00122763	0.000996786	DHX9/SETD2/TP53BP1/PARG/ARID2/WDR48/RIF1/SIRT1/TRIP12/UBR5/ERCC6/SLF2/PPP4R2/POT1/ABRAXAS1/RNF169/KMT5B/SHLD2/SLF1/EYA3/PRKDC/BRCC3/SMCHD1/TFIP11/SPIRE1/KAT7/ACTR2/CUL4A/RNF168/NSD2/FAM168A/KLHL15/SPIDR/USP1/OTUB2/PARP1/BRCA1/FIGNL1/HELB/UBQLN4/TIMELESS/DTX3L/AXIN2/DEK/PARP9/FGF10	46
BP	GO:0007099	centriole replication	20/3781	41/18723	3.8941e-05	0.00123413	0.00100206	CCP110/VPS4B/ALMS1/CEP44/CEP120/KIAA0753/CEP192/CEP135/CEP295/MDM1/SASS6/POC1B/TRIM37/CEP76/C2CD3/CDK5RAP2/BRCA1/PLK4/STIL/PLK2	20
BP	GO:0007178	transmembrane receptor protein serine/threonine kinase signaling pathway	103/3781	355/18723	3.99745e-05	0.00126042	0.00102341	SMAD5/CREB1/CTDSPL2/APPL1/RNF111/TGFBRAP1/XIAP/SIRT1/LATS1/LEMD3/CREBBP/EP300/PDPK1/TRIM33/PPM1A/BMPR2/UBE2D3/USP9X/SMAD4/MAPK14/ADAM17/SMAD2/SNX6/APPL2/ACVR2B/ABL1/ZMIZ1/ACVR1B/BMPR1A/MAP3K7/STAT3/NOTCH2/MTMR4/ZNF8/PTK2/ZFYVE9/NLK/SMAD1/BCL9L/HIVEP1/SPRED2/SPTBN1/STRAP/SNX25/SKIL/PARP1/ACVR1/TWSG1/NUMA1/NEO1/THBS1/SORL1/PBLD/NOMO3/LDLRAD4/SMAD3/CRIM1/ELAPOR2/PCSK6/FUT8/SMURF2/HIPK2/SPART/SPRED1/…	103
BP	GO:0010948	negative regulation of cell cycle process	88/3781	294/18723	4.14239e-05	0.00129949	0.00105513	GIGYF2/WAPL/ATRX/USP47/TP53BP1/APC/CLOCK/ATF2/CCP110/PTPN11/RAD17/FEM1B/ERCC6/CDC73/TAOK1/SDE2/TPR/DLG1/RBL2/XPC/ATR/ABRAXAS1/ETAA1/WAC/EIF2AK4/TMEM67/TNKS/PRKAR1A/RINT1/CTDSP2/MAPK14/TOPBP1/NBN/NME6/CRY1/PRKDC/RAD1/BRCC3/CDC5L/MDM1/WEE1/TERF1/TAOK3/TRIM37/TOM1L1/MRE11/APBB2/CUL4A/CDK5RAP2/INTS7/RB1/MDC1/MSH2/MAP3K20/USP28/CTDSPL/ZWILCH/BRCA1/PKD2/PTEN/ATM/ZNF655/KNTC1/MDM2/RFWD3/BCL2/TIMELESS/BU…	88
BP	GO:0048588	developmental cell growth	73/3781	234/18723	4.18172e-05	0.0013052	0.00105977	SIN3A/ADNP/SPG11/DIP2B/EIF4G2/IMPACT/MTOR/GSK3B/PAFAH1B1/KMT2D/BMPR2/EIF2AK4/USP9X/GOLGA4/MACF1/PPP3CB/IQGAP1/CTNNB1/ABL1/CYFIP1/RAB21/ITGB1/RYK/RAPH1/RNF6/NIN/ITSN2/MEX3C/AKAP13/SPAG9/SHTN1/ULK2/RAB11A/MAP2K4/SEMA4F/VCL/CDKL5/SLC23A2/SEMA3C/NEDD4L/HSP90AA1/PDLIM5/SEMA5A/DDR1/SPART/DDX39B/SEMA3F/ALCAM/SLIT2/MAPT/SEMA4B/PTPRS/DCLK1/TIAM1/POSTN/LAMB2/WNT3/CYFIP2/MAP1B/SEMA6D/WNT5A/FN1/LRP1/NRCAM/FL…	73
BP	GO:0031330	negative regulation of cellular catabolic process	80/3781	262/18723	4.26898e-05	0.00132574	0.00107645	DHX9/TAF1/THRAP3/SMG1/PHAX/HNRNPU/SMCR8/ROCK1/MARCHF7/DHX36/EIF4G2/TBC1D14/USP7/NBAS/TAB3/MTOR/SMARCC1/RYBP/USP30/RUBCN/WAC/LRPPRC/TENT2/BECN1/ZKSCAN3/MAPK14/ANGEL2/HERC1/BAG5/TSC1/PIK3CA/LARP1/METTL16/PAIP1/MTM1/FMR1/SECISBP2/USP19/NAF1/LRIG2/RGP1/PSEN1/SUFU/STAT3/OPHN1/MTMR9/RIC1/ETFBKMT/NMNAT1/STYX/SYNCRIP/TAB2/TIRAP/WDR6/USP14/TENT4B/OGT/TLK2/PTPN3/SEC22B/SVIP/SORL1/USP25/BCL2/NPC1/ALAD/UBQLN…	80
BP	GO:0030518	intracellular steroid hormone receptor signaling pathway	42/3781	116/18723	4.45441e-05	0.00137641	0.00111759	ARID1A/CLOCK/SIRT1/UBE3A/UBR5/LATS1/EP300/STRN3/KMT2D/TMF1/NCOR1/CNOT1/KDM3A/UFL1/NCOA4/DDX17/CRY1/RNF14/RBFOX2/ZMIZ1/UFSP2/RNF6/NEDD4/PTGES3/ARNTL/PARP1/BRCA1/MED1/NCOR2/YAP1/CALCOCO1/CRY2/KANK2/ESR1/NR3C1/TRERF1/PGR/AR/FOXA1/EGLN2/SRARP/TP63	42
BP	GO:0072665	protein localization to vacuole	28/3781	67/18723	4.50693e-05	0.00138571	0.00112514	PIK3R4/ZFYVE16/GCC2/AP3B1/AP3M1/VPS41/M6PR/NCOA4/VPS13A/VPS13D/STAM/VPS13C/SCARB2/LMBRD1/VPS36/NEDD4/VPS37A/HSPA8/MON1B/ROCK2/SORT1/GNPTAB/LAMP2/SORL1/SNX16/SH3BP4/GPR137B/CACNG4	28
BP	GO:0018105	peptidyl-serine phosphorylation	93/3781	315/18723	4.53968e-05	0.00138887	0.0011277	TAF1/CSNK1G3/CSNK1A1/SMG1/PKN2/CSNK1G1/CHUK/HIPK1/RAF1/SRPK2/LATS1/ROCK1/NSD1/UHMK1/FNIP1/LMTK2/WNK1/RICTOR/TOP1/PDPK1/MTOR/PIKFYVE/TLK1/GSK3B/ATR/MORC3/GGNBP2/PRKCI/AKAP9/TNKS/DYRK1A/PAK2/TTBK2/HIPK3/MAPK1/MAPK14/MAPK8/PIK3CA/BRAF/TBK1/PRKDC/CAB39/DOCK7/EIF2AK3/MAPK9/CREBL2/ULK2/NLK/RPS6KA5/PDCD10/ROCK2/STK4/RPTOR/TLK2/PTEN/ATM/PDK3/BAG4/GPD1L/TSSK4/FNIP2/BCL2/INPP5F/PAQR3/VRK2/RPS6KB1/HSP90AA1/…	93
BP	GO:0031050	dsRNA processing	24/3781	54/18723	4.71483e-05	0.00142832	0.00115973	PUM1/PUM2/DDX3X/PRKRA/ZC3H7A/SNIP1/DROSHA/NCOR1/ZMPSTE24/SMAD2/AGO1/DICER1/ADAR/TUT7/AGO4/AGO3/STAT3/SMAD1/SMAD3/ZC3H7B/NCOR2/ESR1/PPP3CA/AGO2	24
BP	GO:0070918	production of small RNA involved in gene silencing by RNA	24/3781	54/18723	4.71483e-05	0.00142832	0.00115973	PUM1/PUM2/DDX3X/PRKRA/ZC3H7A/SNIP1/DROSHA/NCOR1/ZMPSTE24/SMAD2/AGO1/DICER1/ADAR/TUT7/AGO4/AGO3/STAT3/SMAD1/SMAD3/ZC3H7B/NCOR2/ESR1/PPP3CA/AGO2	24
BP	GO:0018022	peptidyl-lysine methylation	46/3781	131/18723	4.78957e-05	0.00144388	0.00117237	ATRX/SETD2/CTR9/ASH1L/SUZ12/RIF1/SIRT1/NSD1/RBBP5/ARID4A/PAXIP1/KDM6A/SETD5/KMT2D/ZNF304/KMT2E/RTF1/SETDB1/KMT2C/WDR82/KDM3A/SMAD4/KMT5B/RLF/TET2/BCOR/CTNNB1/SETD1B/KMT2A/SETD7/MECP2/WDR5B/SUPT6H/ETFBKMT/N6AMT1/NSD2/TET3/OGT/NSD3/BRCA1/EZH1/JARID2/DNMT1/MYB/ASH2L/GATA3	46
BP	GO:0046777	protein autophosphorylation	71/3781	227/18723	4.82006e-05	0.00144602	0.00117411	TAF1/SMG1/DDX3X/SLK/UHMK1/TRPM7/IMPACT/TAOK1/LMTK2/WNK1/PDPK1/MTOR/PIKFYVE/GSK3B/ATR/OXSR1/EIF2AK4/DYRK1A/PAK2/FER/NBN/IQGAP1/ABL1/CAMKK2/ACVR1B/TAOK3/TOM1L1/MRE11/EIF2S1/MOB1B/EIF2AK3/EEF2K/ULK2/PTK2/NLK/TRIM24/EIF2AK2/STK24/CDK12/STK4/CDKL5/PEAK1/ATM/TSSK4/IGF1R/VRK2/STK39/MAP3K9/INSR/RAP2C/ENPP1/DDR1/ERBB4/PDGFC/ERN1/YES1/PDGFD/DDR2/FGFR1/PDGFRB/TEK/STK26/SRMS/TNIK/FGFR2/NEK10/GREM1/NTRK2/FGFR…	71
BP	GO:0032786	positive regulation of DNA-templated transcription, elongation	15/3781	27/18723	5.31222e-05	0.00157834	0.00128155	CCNT1/SCAF8/SUPT16H/ERCC6/CDC73/CCNT2/CDK13/CTNNB1/CCNK/TCERG1/KAT7/SUPT6H/LEO1/CDK12/DDX39B	15
BP	GO:0034453	microtubule anchoring	15/3781	27/18723	5.31222e-05	0.00157834	0.00128155	CLASP2/GCC2/CEP350/KIF3A/CLASP1/GSK3B/DAG1/DCTN1/CEP20/NIN/PCM1/BBS4/HOOK3/CEP19/SAXO2	15
BP	GO:0000281	mitotic cytokinesis	29/3781	71/18723	5.50627e-05	0.00162042	0.00131571	SON/USP8/APC/VPS4B/ROCK1/PDCD6IP/RASA1/SPAST/CHMP3/ZFYVE26/CHMP2B/MYH10/SNX18/KIF20B/ECT2/BBS4/ROCK2/TTC19/SPTBN1/SNX9/MAP9/EFHC1/CKAP2/ANK3/ARL3/RACGAP1/INCENP/RHOB/TRIM36	29
BP	GO:0003281	ventricular septum development	29/3781	71/18723	5.50627e-05	0.00162042	0.00131571	HECTD1/TRIP11/BMPR2/SMAD4/AP2B1/DCTN5/FRS2/BMPR1A/SUFU/LUZP1/NSD2/SAV1/ACVR1/CNTRL/MDM2/MDM4/TGFBR1/SOX4/HEG1/TBX3/GATA3/SLIT2/LRP2/WNT5A/CITED2/TGFB2/SLIT3/FGFR2/TGFBR3	29
BP	GO:0001952	regulation of cell-matrix adhesion	45/3781	128/18723	5.56955e-05	0.00162136	0.00131647	NF1/CLASP2/PTPN11/ROCK1/SLK/CLASP1/GSK3B/DAG1/RASA1/ACER2/EPB41L5/MACF1/IQGAP1/TSC1/PTPRA/PIK3CB/ABL1/FMN1/PTK2/ROCK2/DUSP3/CASK/UTRN/VCL/PEAK1/PTEN/THBS1/SMAD3/BCL2/BCAS3/RIN2/DDR1/CDH13/PHLDB2/PIK3R1/FERMT2/SDC4/EMP2/POSTN/TEK/LRP1/LIMCH1/EPHA3/GREM1/SEMA3E	45
BP	GO:1904356	regulation of telomere maintenance via telomere lengthening	26/3781	61/18723	5.57797e-05	0.00162136	0.00131647	HNRNPU/ERCC4/DHX36/POT1/TNKS2/XRCC5/ATR/DCP2/SMG6/TNKS/MAPK1/EXOSC10/CTNNB1/SLX4/XRN1/NEK7/NAF1/TERF1/GNL3L/MAP3K4/CTC1/TENT4B/PARP1/ATM/CCT2/PKIB	26
BP	GO:0008361	regulation of cell size	59/3781	181/18723	5.58817e-05	0.00162136	0.00131647	CREB1/SIN3A/ADNP/LARS1/DIP2B/EIF4G2/CLCN3/MTOR/GSK3B/PAFAH1B1/BMPR2/MTPN/ATP7A/GOLGA4/MACF1/RB1CC1/TSC1/ABL1/ANO6/CYFIP1/RAB21/RYK/RNF6/SHTN1/ULK2/RAB11A/WDTC1/SEMA4F/RPTOR/CDKL5/VAV2/PTEN/SLC12A6/SEMA3C/SLC12A2/VAV3/SLC12A7/SEMA5A/SPART/RDX/SEMA3F/MAPT/SEMA4B/PTPRS/WNT3/MAP1B/SEMA6D/WNT5A/FN1/RET/LRP1/NRCAM/DEPTOR/APOE/SLC9A3R1/OLFM1/SEMA3E/KCNN4/SEMA3B	59
BP	GO:0043631	RNA polyadenylation	21/3781	45/18723	5.76956e-05	0.00165841	0.00134656	CCNT1/YTHDC1/CTR9/SCAF8/CPSF6/ZC3H14/RNF20/PAPOLA/CDC73/PAPOLG/CPSF2/TENT2/NUDT21/AHCYL1/VIRMA/PCF11/CSTF2/RNF40/CPEB3/TENT4B/LEO1	21
BP	GO:0048538	thymus development	21/3781	45/18723	5.76956e-05	0.00165841	0.00134656	RAF1/CRKL/ZBTB1/MAPK1/ZMPSTE24/BCL2L11/CTNNB1/ASXL1/ABL1/PBX1/PRKDC/PSEN1/CTC1/SIX4/BCL2/JARID2/TGFBR1/GATA3/CITED2/FGF10/SIX1	21
BP	GO:0034502	protein localization to chromosome	35/3781	92/18723	5.8514e-05	0.00167415	0.00135934	WAPL/ATRX/NIPBL/TASOR/SETD2/CTCF/SLF2/POT1/TNKS2/XRCC5/ATR/TNKS/CHAMP1/SLF1/SMC5/MCM9/TERF1/RPA1/MIS12/VCPIP1/GNL3L/RB1/MSH2/SPIDR/ZWILCH/CENPQ/KNTC1/CCT2/BUB3/RAD21/BRCA2/ESR1/KNL1/ESCO2/BUB1B	35
BP	GO:0072175	epithelial tube formation	46/3781	132/18723	5.9287e-05	0.00167888	0.00136318	SEC24B/MIB1/SETD2/HECTD1/OPA1/TRAF6/ARHGAP35/PHACTR4/CEP290/MED12/GRHL2/TSC1/CTNNB1/ABL1/SHROOM3/SUFU/BRD2/LUZP1/CC2D2A/KIF20B/BBS4/TCTN1/TULP3/STK4/SIX4/CELSR1/STK3/SOX4/FZD3/GATA3/PODXL/SDC4/FZD6/STIL/LRP2/WNT5A/CITED2/RET/TGFB2/RARA/COBL/FGFR2/GREM1/PRKACB/FGF10/SIX1	46
BP	GO:0016331	morphogenesis of embryonic epithelium	50/3781	147/18723	5.96158e-05	0.00167888	0.00136318	SEC24B/MIB1/SETD2/HECTD1/OPA1/TRAF6/ARHGAP35/PHACTR4/EPB41L5/MED12/GRHL2/TSC1/CTNNB1/ABL1/SHROOM3/SUFU/BRD2/LUZP1/CC2D2A/KIF20B/BBS4/TCTN1/TULP3/STK4/SIX4/CELSR1/STK3/SOX4/FZD3/TFAP2A/GATA3/SDC4/AR/LAMA5/FZD6/SULF1/STIL/LRP2/WNT5A/CITED2/RET/TGFB2/RARA/COBL/FGFR2/GREM1/PRKACB/TP63/FGF10/SIX1	50
BP	GO:1902850	microtubule cytoskeleton organization involved in mitosis	50/3781	147/18723	5.96158e-05	0.00167888	0.00136318	STAG2/SETD2/CLASP2/CEP97/FBXW11/HNRNPU/TOGARAM1/UBXN2B/VPS4B/KIF3B/KPNB1/TPR/KIF2A/STAG1/CLASP1/PAFAH1B1/SMC3/ABRAXAS1/ABRAXAS2/TNKS/DYNC1H1/CEP192/SPAST/DCTN1/SMC1A/CKAP5/HTT/CHMP2B/ITGB1/MECP2/PIBF1/CDK5RAP2/NDE1/RAB11A/MAP9/NUMA1/CLTC/EFHC1/PKD1/RACGAP1/EML1/GJA1/STIL/TACC1/KIF11/CEP126/PLK2/CENPE/MISP/FGF10	50
BP	GO:0051236	establishment of RNA localization	55/3781	166/18723	5.97659e-05	0.00167888	0.00136318	DHX9/YTHDC1/SETD2/SMG1/NUP98/CPSF6/PHAX/NUP58/NUP133/XPO1/THOC2/G3BP2/SENP2/TPR/ATR/RANBP2/ATXN2/MCM3AP/SMG6/POM121/NUP160/LRPPRC/SRSF1/TNKS/NCBP1/NUP153/NUP155/FYTTD1/SMG7/TSC1/CKAP5/NCBP3/FMR1/AHCTF1/GLE1/NUP54/TERF1/NUP188/NUP50/NUP205/SUPT6H/NDC1/TOMM20/PARP11/NUP42/UPF2/NUP107/CASC3/NUP210/ATM/XPOT/NXT2/DDX39B/SIDT1/KIF5C	55
BP	GO:0031116	positive regulation of microtubule polymerization	17/3781	33/18723	6.1394e-05	0.00171681	0.00139397	TOGARAM1/CLASP1/AKAP9/DCTN1/SLAIN2/CKAP5/CLIP1/MECP2/OCLN/NIN/CDK5RAP2/NUMA1/ARL3/CDKN1B/MAPT/MAP1B/NAV3	17
BP	GO:0051258	protein polymerization	88/3781	297/18723	6.21967e-05	0.00172651	0.00140185	CLASP2/GMFB/TOGARAM1/WASL/LATS1/TWF1/AP1AR/RICTOR/DLG1/UBE2K/MTOR/TTC17/ARL6/CLASP1/ARFGEF1/NCKAP1/CAPZA2/RASA1/CAMSAP1/ABI2/ARFIP1/AKAP9/MTPN/HAUS2/DYRK1A/CEP192/FER/TUBGCP4/DCTN1/CHMP3/SLAIN2/CKAP5/SSH1/CAMSAP2/ABL1/CLIP1/ADD1/CYFIP1/EPS8/TMOD3/JMY/WASHC5/SPTAN1/DNM1L/MECP2/FMN1/SPIRE1/OCLN/NIN/ACTR2/CDK5RAP2/PRUNE1/NDE1/TUBGCP5/RANBP9/HDGFL3/SPTBN1/SNX9/CARMIL1/WASF2/SSH2/NUMA1/BAG4/PPP1R9A/GR…	88
BP	GO:0006261	DNA-dependent DNA replication	51/3781	151/18723	6.22998e-05	0.00172651	0.00140185	ATRX/RFC1/BOD1L1/SRPK2/PRIMPOL/INO80/ORC4/FANCM/ORC2/ATR/POLA1/ETAA1/RECQL/EXD2/NOC3L/ZMPSTE24/TOPBP1/NBN/MCM9/WRN/PURA/LIG3/NUCKS1/PRIM1/TERF1/DDX21/DDX23/RPA1/MRE11/KAT7/REV3L/MCMBP/RRM2B/RFC5/ORC3/WDHD1/HELB/BAZ1A/RFWD3/TIMELESS/POLD3/MCM2/CCNE2/RFC3/FAM111A/DACH1/BRCA2/DNA2/E2F7/GINS4/MCM4	51
BP	GO:0031589	cell-substrate adhesion	104/3781	363/18723	6.40356e-05	0.0017667	0.00143448	NF1/CLASP2/PTPN11/ROCK1/MKLN1/SLK/ATRN/TRPM7/AP1AR/PDPK1/CLASP1/GSK3B/DAG1/RASA1/CRKL/ACER2/FER/RREB1/EPB41L5/MACF1/BCL2L11/IQGAP1/TSC1/PTPRA/CTNNB1/PIK3CB/ABL1/ITGB1/MEGF9/FMN1/PIP5K1A/CRK/TIMM10B/PTK2/DOCK1/ITGAV/ROCK2/ITGA2/DUSP3/CARMIL1/PARVA/STK4/CASK/UTRN/VCL/PEAK1/PPFIA1/PTEN/THBS1/SMAD3/BCL2/JAM3/BCAS3/LAMC1/RIN2/PRKCE/PKD1/DDR1/PREX1/ADAM9/CDH13/TESK2/NID1/NPNT/MYADM/PHLDB2/ANTXR1/PIK3R1…	104
BP	GO:0031334	positive regulation of protein-containing complex assembly	73/3781	237/18723	6.62262e-05	0.00181536	0.00147399	CREB1/DDX3X/GMFB/CAND1/TOGARAM1/ICE1/WASL/SLF2/AP1AR/FNIP1/RICTOR/DLG1/MTOR/CLASP1/GSK3B/ATR/NCKAP1/ABI2/ARFIP1/AKAP9/FER/CRBN/BCL2L11/SLF1/DCTN1/SLAIN2/CKAP5/DHX33/CLIP1/CYFIP1/JMY/WASHC5/MECP2/FMN1/SPIRE1/TERF1/OCLN/NIN/RAP1B/ACTR2/CDK5RAP2/GNL3L/MAPK9/TIRAP/SPIDR/SNX9/CARMIL1/WASF2/NUMA1/ATM/BAG4/ASAP1/FNIP2/UNC13B/GRB2/MPP7/HSP90AA1/PRKCE/CRACD/ARL3/TFRC/ABCA1/ESR1/CDKN1B/ABCA3/FERMT2/MAPT/IQ…	73
BP	GO:1901988	negative regulation of cell cycle phase transition	76/3781	249/18723	6.63869e-05	0.00181536	0.00147399	GIGYF2/USP47/TP53BP1/APC/CLOCK/ATF2/PTPN11/RAD17/FEM1B/ERCC6/CDC73/TAOK1/SDE2/TPR/DLG1/RBL2/XPC/ATR/ABRAXAS1/ETAA1/WAC/EIF2AK4/RINT1/CTDSP2/MAPK14/TOPBP1/NBN/CRY1/PRKDC/RAD1/BRCC3/CDC5L/WEE1/TAOK3/MRE11/APBB2/CUL4A/CDK5RAP2/INTS7/RB1/MDC1/MSH2/MAP3K20/USP28/CTDSPL/ZWILCH/BRCA1/PKD2/PTEN/ATM/ZNF655/KNTC1/MDM2/RFWD3/BCL2/TIMELESS/BUB3/RAD21/NEK11/FOXN3/KANK2/WDR76/CCND1/FANCD2/CDKN1B/RBL1/DDX39B/SO…	76
BP	GO:0043242	negative regulation of protein-containing complex disassembly	32/3781	82/18723	6.7394e-05	0.00182673	0.00148323	SCAF8/APC/CLASP2/TWF1/TAOK1/CLASP1/CAPZA2/CAMSAP1/RUBCN/MTPN/TTBK2/PIK3CA/CAMSAP2/ADD1/EPS8/TMOD3/SPTAN1/ATXN7/LIMA1/HDGFL3/SPTBN1/CARMIL1/SWAP70/UBQLN4/CKAP2/CRACD/SVIL/RDX/MAP1B/ADD3/NAV3/BMERB1	32
BP	GO:2001252	positive regulation of chromosome organization	32/3781	82/18723	6.7394e-05	0.00182673	0.00148323	ATRX/TASOR/DHX36/SLF2/POT1/TNKS2/TPR/XRCC5/ATR/ZNF304/ATF7IP/SETDB1/TNKS/MAPK1/NBN/SLF1/SMC5/CTNNB1/SLX4/NEK7/NAF1/MPHOSPH8/MRE11/LIG4/MAP3K4/RESF1/NUMA1/ATM/CCT2/DNMT1/RAD21/PKIB	32
BP	GO:0031113	regulation of microtubule polymerization	24/3781	55/18723	6.77342e-05	0.00182794	0.00148421	TOGARAM1/CLASP1/CAMSAP1/AKAP9/DYRK1A/DCTN1/SLAIN2/CKAP5/CAMSAP2/ABL1/CLIP1/MECP2/OCLN/NIN/CDK5RAP2/PRUNE1/NUMA1/FKBP4/ARL3/CDKN1B/MAPT/MAP1B/INPP5J/NAV3	24
BP	GO:0034504	protein localization to nucleus	86/3781	290/18723	7.24272e-05	0.00194504	0.00157929	SIN3A/TNPO1/IPO11/APPL1/IPO8/NUP98/IPO7/HNRNPU/NUP58/UBR5/LATS1/NUP133/XPO1/KPNB1/KPNA1/TPR/KPNA6/PIKFYVE/GSK3B/TOPORS/RANBP2/FAM53C/POM121/MORC3/TOR1AIP1/POLR1A/NOL8/NUP153/NUP155/CD2AP/RBM22/MAPK1/MAPK14/IPO9/NMD3/CTNNA1/APPL2/EFCAB7/OTUD7B/WRN/RANBP6/NUP54/NUP188/PSEN1/SUFU/TNPO3/STAT3/KAT7/UTP25/NUP50/KPNA3/EIF2AK3/OSBPL8/IPO5/NOLC1/GLI3/ECT2/BBS4/RAB23/MAVS/NUP107/SKP1/PARP1/BARD1/SIX4/MED1/…	86
BP	GO:0045807	positive regulation of endocytosis	37/3781	100/18723	7.30176e-05	0.00194504	0.00157929	HNRNPK/MIB1/APPL1/ANKFY1/WASL/TBC1D5/CBLL1/SCYL2/HIP1/AP2B1/APPL2/SYNJ1/ANO6/FMR1/RAB21/DNM1L/ATAD1/TSG101/CBL/ITSN1/EEF2K/ITGA2/AHI1/NEDD4L/INSR/PPT1/DGKD/ARRB1/PPP3CA/RAB31/HFE/WNT5A/LRP1/APOE/GREM1/GPC3/CCL19	37
BP	GO:0061640	cytoskeleton-dependent cytokinesis	37/3781	100/18723	7.30176e-05	0.00194504	0.00157929	SON/USP8/APC/VPS4B/ROCK1/PDCD6IP/SEPTIN2/RASA1/SPAST/CHMP3/ZFYVE26/CHMP2B/MYH10/WASHC5/SEPTIN7/SPIRE1/SNX18/ACTR2/KIF20B/SEPTIN10/ECT2/BBS4/ROCK2/TTC19/SPTBN1/SNX9/MAP9/SEPTIN8/EFHC1/CKAP2/SEPTIN11/ANK3/ARL3/RACGAP1/INCENP/RHOB/TRIM36	37
BP	GO:1901880	negative regulation of protein depolymerization	29/3781	72/18723	7.45547e-05	0.00197746	0.00160561	APC/CLASP2/TWF1/TAOK1/CLASP1/CAPZA2/CAMSAP1/MTPN/TTBK2/PIK3CA/CAMSAP2/ADD1/EPS8/TMOD3/SPTAN1/ATXN7/LIMA1/HDGFL3/SPTBN1/CARMIL1/SWAP70/CKAP2/CRACD/SVIL/RDX/MAP1B/ADD3/NAV3/BMERB1	29
BP	GO:0000082	G1/S transition of mitotic cell cycle	67/3781	214/18723	7.49208e-05	0.00197868	0.0016066	GIGYF2/CUL3/APPL1/USP37/DDX3X/APC/LATS1/INO80/CDC73/ANKRD17/SDE2/GSPT1/DLG1/CUL5/CUL4B/RBL2/KMT2E/PPP6C/EIF4E/WAC/PIAS1/CTDSP2/LSM11/ADAM17/CDK17/NPAT/APPL2/PHF8/PRKDC/CACUL1/PSME3/ECD/ITGB1/WEE1/ACVR1B/PPAT/CUL2/CUL4A/RB1/CTDSPL/ACVR1/RPTOR/PKD2/PTEN/ATM/ZNF655/MDM2/RFWD3/BACH1/BCL2/CDK14/RPS6KB1/RBBP8/KLF11/PKD1/CCNE2/KANK2/CCND1/CDKN1B/RBL1/RDX/SOX4/PPP3CA/E2F7/INHBA/PLK2/FGF10	67
BP	GO:0007266	Rho protein signal transduction	47/3781	137/18723	7.70754e-05	0.00202692	0.00164577	CUL3/CHUK/RAF1/ROCK1/ARHGEF12/SCAI/ARHGAP5/ARHGAP35/PHACTR4/HACD3/ABL1/EPS8/ITGB1/ABL2/GNA13/OPHN1/AKAP13/SHTN1/TNFAIP1/RALBP1/ARHGEF11/ROCK2/CDC42SE1/CELSR1/ARHGAP29/STARD13/ARHGEF3/CCDC125/KANK2/ABCA1/CDH13/ARHGEF28/ARRB1/CTNNAL1/F2R/HEG1/ARHGAP42/LPAR1/NET1/PDGFRB/ITGA3/RHOB/APOE/COL3A1/AGTR1/COL1A2/F2RL2	47
BP	GO:0007062	sister chromatid cohesion	26/3781	62/18723	7.77434e-05	0.00202866	0.00164719	WAPL/ATRX/STAG2/NIPBL/CTCF/PDS5A/PDS5B/SLF2/STAG1/SMC3/TNKS/ESCO1/SLF1/SMC1A/SMC5/CTNNB1/POGZ/MRE11/NAA50/MCMBP/RB1/RAD21/SGO2/AXIN2/ESCO2/BUB1B	26
BP	GO:0007346	regulation of mitotic cell cycle	126/3781	457/18723	7.77983e-05	0.00202866	0.00164719	GIGYF2/CUL3/USP47/SIN3A/APPL1/CDC23/DDX3X/APC/PKN2/ATF2/SIRT1/PTPN11/RAD17/HNRNPU/YTHDC2/VPS4B/INO80/CDC73/TAOK1/ANKRD17/SDE2/PHIP/TPR/DLG1/KLHL18/CDC27/RBL2/PAFAH1B1/XPC/PRMT5/ABRAXAS1/KMT2E/USP22/EIF4E/CDK13/WAC/RINT1/CTDSP2/LSM11/ZMPSTE24/TOPBP1/NBN/ANGEL2/ADAM17/IQGAP1/NME6/GBF1/CTNNB1/APPL2/ABL1/PBX1/PRKDC/PSME3/ECD/NEK7/TMOD3/BRCC3/WEE1/MECP2/TAOK3/DDB1/TOM1L1/MRE11/CUL4A/CDK5RAP2/DYNLT3/KI…	126
BP	GO:0036092	phosphatidylinositol-3-phosphate biosynthetic process	11/3781	17/18723	8.22972e-05	0.00213696	0.00173512	PIK3C2A/PIK3C3/PIKFYVE/OCRL/PIK3CA/PIK3CB/SYNJ1/SYNJ2/INPP4B/ATM/PIK3R3	11
BP	GO:0031060	regulation of histone methylation	28/3781	69/18723	8.43534e-05	0.0021721	0.00176365	ATRX/CTCF/CTR9/RIF1/SIRT1/RNF20/NSD1/PAXIP1/ZNF304/KMT2E/RTF1/KDM3A/SMAD4/BCOR/CTNNB1/KMT2A/SETD7/MECP2/SUPT6H/PAXBP1/OGT/NSD3/BRCA1/JARID2/DNMT1/MYB/AASS/GATA3	28
BP	GO:1904377	positive regulation of protein localization to cell periphery	28/3781	69/18723	8.43534e-05	0.0021721	0.00176365	CNST/DLG1/PDPK1/KIF5B/RAB11FIP2/PRKCI/EPB41/EFCAB7/PTPN9/ATP2C1/ITGB1/RAB11A/SPTBN1/ACSL3/PLS1/NUMA1/PRKCE/ATP2B4/PIK3R1/SORBS1/AKAP5/KCNJ11/EPB41L2/ITGA3/ZDHHC2/LRP1/EPHA3/AGR2	28
BP	GO:0006888	endoplasmic reticulum to Golgi vesicle-mediated transport	45/3781	130/18723	8.51109e-05	0.00218251	0.00177211	CUL3/SEC24B/TRAPPC8/TRAPPC11/COPG2/TRIP11/GOSR1/SEC24C/KLHL12/COPB1/SEC23IP/TRAPPC6B/PPP6C/SEC22C/SPAST/RINT1/STX17/SEC24A/GBF1/LMAN1/TMED7/YIPF5/USO1/SEC23B/COG3/TMED5/COPB2/SEC31A/VAPB/TMED10/COPA/SEC24D/ERGIC2/GOPC/ARCN1/SEC16A/RNF139/SEC23A/MIA2/MIA3/SEC22B/SORL1/PGAP1/ERGIC1/HYOU1	45
BP	GO:0031346	positive regulation of cell projection organization	101/3781	353/18723	8.56903e-05	0.00218829	0.0017768	ADNP/APC/CAPRIN1/CCP110/ATF1/KIDINS220/WASL/FBXO38/DHX36/EIF4G2/TWF1/EP300/OPA1/MTOR/RRN3/PAFAH1B1/NCKAP1/SETX/FNBP1L/TMEM106B/ABI2/BMPR2/CEP120/ARHGAP35/PRKCI/FBXW8/ATP7A/CEP135/GOLGA4/RREB1/MACF1/IQGAP1/TMEM30A/PIK3CA/HTT/CYFIP1/EPS8/FMR1/CBFA2T2/RAB21/WASHC5/SEPTIN7/RAPGEF2/DNM1L/ATMIN/SCARB2/ABL2/TRAK1/OCLN/NIN/ACTR2/SHTN1/EEF2K/NFE2L2/RAB11A/BBS4/NPTN/AKIRIN1/ITGA2/CARMIL1/WASF2/SKIL/TAPT1/C…	101
BP	GO:0030100	regulation of endocytosis	66/3781	211/18723	8.70311e-05	0.00221338	0.00179717	HNRNPK/MIB1/APPL1/ANKFY1/ZFYVE16/WASL/TBC1D5/CBLL1/ROCK1/MKLN1/RUFY2/USP46/SCYL2/ATXN2/HIP1/UBQLN2/RUBCN/CD2AP/BTBD9/PPP3CB/AP2B1/RAB5B/PIK3CB/APPL2/ABL1/SYNJ1/ANO6/FMR1/RAB21/DNM1L/ATAD1/ABL2/TSG101/SMAP1/OPHN1/CBL/ITSN1/VAMP4/EEF2K/ITGAV/ITGA2/NEU3/BMP2K/AHI1/NEDD4L/INSR/PPT1/PTPN1/ABCA2/CDH13/DGKD/ARRB1/PPP3CA/RAB31/HFE/PROM2/DNAJC6/WNT5A/APOC1/LRP1/EPHA3/APOE/GREM1/STON2/GPC3/CCL19	66
BP	GO:0009411	response to UV	50/3781	149/18723	8.80795e-05	0.00221751	0.00180052	TAF1/USP47/MAP4K3/RO60/POLK/SIRT1/ERCC4/DHX36/TRIM32/ERCC6/PRIMPOL/INO80/CREBBP/IMPACT/SDE2/EP300/CUL4B/XPC/ATR/REV1/EIF2AK4/RHBDD1/ZBTB1/MAPK8/PPID/UBE4B/FMR1/WRN/DDB1/MSH6/EIF2S1/SPRTN/NEDD4/MAP3K4/MSH2/USP1/USP28/PARP1/UVSSA/MDM2/CAT/BCL2/POLD3/TP53INP1/BRCA2/CCND1/PIK3R1/PRKAA1/DTL/PTPRK	50
BP	GO:0048736	appendage development	56/3781	172/18723	8.82698e-05	0.00221751	0.00180052	ATRX/NIPBL/CREBBP/LMBR1/INTU/RC3H2/BMPR2/LNPK/SMAD4/WDR19/GRHL2/BCL2L11/CTNNB1/PBX1/ZNF141/RPGRIP1L/DYNC2H1/BPNT2/TBC1D32/FMN1/BMPR1A/PSEN1/C2CD3/NOTCH2/BBS7/GLI3/TULP3/MAP3K20/FLVCR1/ZNRF3/MED1/SEMA3C/IFT140/AFF3/IRF6/SOX4/ECE1/TFAP2A/TBX3/FERMT2/FZD6/WNT3/CHD7/WNT5A/NR2F2/TGFB2/RARA/FGFR2/BMPR1B/ITGA6/GREM1/EN1/GPC3/TP63/FGF10/TFAP2B	56
BP	GO:0060173	limb development	56/3781	172/18723	8.82698e-05	0.00221751	0.00180052	ATRX/NIPBL/CREBBP/LMBR1/INTU/RC3H2/BMPR2/LNPK/SMAD4/WDR19/GRHL2/BCL2L11/CTNNB1/PBX1/ZNF141/RPGRIP1L/DYNC2H1/BPNT2/TBC1D32/FMN1/BMPR1A/PSEN1/C2CD3/NOTCH2/BBS7/GLI3/TULP3/MAP3K20/FLVCR1/ZNRF3/MED1/SEMA3C/IFT140/AFF3/IRF6/SOX4/ECE1/TFAP2A/TBX3/FERMT2/FZD6/WNT3/CHD7/WNT5A/NR2F2/TGFB2/RARA/FGFR2/BMPR1B/ITGA6/GREM1/EN1/GPC3/TP63/FGF10/TFAP2B	56
BP	GO:0046785	microtubule polymerization	32/3781	83/18723	8.86401e-05	0.0022178	0.00180076	CLASP2/TOGARAM1/CLASP1/CAMSAP1/AKAP9/HAUS2/DYRK1A/CEP192/TUBGCP4/DCTN1/SLAIN2/CKAP5/CAMSAP2/ABL1/CLIP1/MECP2/OCLN/NIN/CDK5RAP2/PRUNE1/NDE1/TUBGCP5/RANBP9/HDGFL3/NUMA1/FKBP4/ARL3/CDKN1B/MAPT/MAP1B/INPP5J/NAV3	32
BP	GO:0045732	positive regulation of protein catabolic process	71/3781	231/18723	8.90511e-05	0.0022191	0.00180181	TAF1/CSNK1A1/HECTD1/APC/RNF41/ITCH/ZYG11B/SOCS4/TRIM32/ANKIB1/UBQLN1/HUWE1/TMTC3/GSK3B/ARIH1/UBQLN2/RCHY1/PIAS1/FBXW8/VGLL4/IDE/FBXL5/RNF14/AREL1/FMR1/SOCS5/PSEN1/DDB1/HACE1/NDFIP1/RNF40/BBS7/NEDD4/WWP1/MAPK9/NSF/PTK2/SH3D19/NFE2L2/RNF139/PSMC1/SNX9/VPS35/SNX1/BARD1/USP13/PTEN/SEC22B/SORL1/MDM2/GCLC/RNF19A/TIPARP/MYLIP/NEDD4L/HSP90AA1/SMURF2/ADAM9/ABCA2/CDKN1B/RDX/GJA1/DTL/LRP2/PLK2/EGLN2/WNT5A/L…	71
BP	GO:0007033	vacuole organization	58/3781	180/18723	9.22175e-05	0.00228877	0.00185838	TRAPPC8/ATF2/SMCR8/UBXN2B/SPG11/PIK3C3/ATG2B/RAB14/HOOK1/RAB3GAP2/UBQLN1/AP3B1/TBC1D14/MTOR/PIKFYVE/ATP2A2/TMEM106B/UBQLN2/AMBRA1/BECN1/ZKSCAN3/STX17/RAB33B/ATG14/ATG9A/TBC1D12/RB1CC1/CHMP3/ARL8B/CHMP2B/RAB3GAP1/MTM1/WASHC5/STX12/SCARB2/PSEN1/MBTPS1/IFT88/ATP6AP2/PIP4K2C/ULK2/RAB23/LYST/MAN2A1/TMEM41B/PIP4K2B/GNPTAB/SEC22B/HOOK3/ATG16L1/TP53INP1/PPT1/ABCA1/ELAPOR1/WIPI1/SYNPO2/SYT7/NDP	58
BP	GO:0007051	spindle organization	59/3781	184/18723	9.39489e-05	0.00231178	0.00187706	ATRX/STAG2/CLASP2/CEP97/HNRNPU/TOGARAM1/VPS4B/KIF3B/INO80/KPNB1/TPR/KIF2A/DLG1/SENP6/STAG1/CLASP1/SMC3/HAUS3/ABRAXAS1/ABRAXAS2/CEP120/NCOR1/TNKS/DYNC1H1/HAUS2/CEP192/SPAST/TUBGCP4/DCTN1/SMC1A/CKAP5/RNF4/CHMP2B/NEK7/MLH1/WASHC5/MECP2/PIBF1/HAUS6/TUBGCP5/RAB11A/CHD3/MAP9/NUMA1/CLTC/EFHC1/PKD1/RACGAP1/EML1/INCENP/STIL/TACC1/KIF11/CEP126/PLK2/CENPE/ASPM/TRIM36/MISP	59
BP	GO:0035107	appendage morphogenesis	47/3781	138/18723	9.42666e-05	0.00231178	0.00187706	ATRX/NIPBL/CREBBP/LMBR1/INTU/LNPK/SMAD4/WDR19/GRHL2/BCL2L11/CTNNB1/PBX1/ZNF141/RPGRIP1L/DYNC2H1/BPNT2/TBC1D32/FMN1/BMPR1A/PSEN1/C2CD3/NOTCH2/GLI3/TULP3/MAP3K20/FLVCR1/MED1/SEMA3C/IFT140/AFF3/SOX4/ECE1/TFAP2A/TBX3/FZD6/WNT3/CHD7/WNT5A/TGFB2/FGFR2/BMPR1B/GREM1/EN1/GPC3/TP63/FGF10/TFAP2B	47
BP	GO:0035108	limb morphogenesis	47/3781	138/18723	9.42666e-05	0.00231178	0.00187706	ATRX/NIPBL/CREBBP/LMBR1/INTU/LNPK/SMAD4/WDR19/GRHL2/BCL2L11/CTNNB1/PBX1/ZNF141/RPGRIP1L/DYNC2H1/BPNT2/TBC1D32/FMN1/BMPR1A/PSEN1/C2CD3/NOTCH2/GLI3/TULP3/MAP3K20/FLVCR1/MED1/SEMA3C/IFT140/AFF3/SOX4/ECE1/TFAP2A/TBX3/FZD6/WNT3/CHD7/WNT5A/TGFB2/FGFR2/BMPR1B/GREM1/EN1/GPC3/TP63/FGF10/TFAP2B	47
BP	GO:0001738	morphogenesis of a polarized epithelium	35/3781	94/18723	9.75234e-05	0.00238219	0.00193424	SEC24B/EXOC5/TRAF3IP1/PAFAH1B1/INTU/DLG5/MED12/MYO9A/ABL1/RPGRIP1L/RYK/RAB10/DAAM1/OPHN1/TTC8/VANGL1/ZNRF3/CELSR1/CELSR2/AHI1/SMURF2/ERBB4/ASTN2/FZD3/MLLT3/LAMA3/LAMA5/FZD6/TIAM1/WNT5A/FAT1/GPC4/SLC9A3R1/GPC3/TP63	35
BP	GO:0031112	positive regulation of microtubule polymerization or depolymerization	18/3781	37/18723	9.87927e-05	0.0024037	0.0019517	TOGARAM1/CLASP1/AKAP9/SPAST/DCTN1/SLAIN2/CKAP5/CLIP1/MECP2/OCLN/NIN/CDK5RAP2/NUMA1/ARL3/CDKN1B/MAPT/MAP1B/NAV3	18
BP	GO:0007029	endoplasmic reticulum organization	33/3781	87/18723	0.000100565	0.00243041	0.00197339	RAB3GAP2/TMCC1/CERT1/LNPK/TMEM33/LMAN1/RAB3GAP1/EMC1/RAB10/POLR2M/LPCAT3/REEP3/VCPIP1/SHTN1/SEC31A/EIF2AK3/MMGT1/VAPB/ESYT1/RAB18/ZBED3/ESYT2/ATL3/SEC16A/CCDC47/MIA3/DOP1B/TRAM2/TRAM1/ARL6IP1/TRAM1L1/ATL1/REEP1	33
BP	GO:0046486	glycerolipid metabolic process	110/3781	392/18723	0.000101196	0.00243041	0.00197339	PIK3C2A/SMG1/SIRT1/PTPN11/PIK3C3/SOCS4/SACM1L/PIGN/PIKFYVE/PAFAH1B1/NAPEPLD/MTMR1/IP6K1/FAR1/OCRL/PNPLA8/MTMR12/FAM126B/PI4KA/ATG14/SELENOI/MTMR6/SERINC3/SERINC1/PIK3CA/PIK3CB/PIGO/ETNK1/SEL1L/SYNJ1/EFR3A/CEPT1/MTM1/BPNT2/SLC44A1/MECP2/SOCS6/SOCS5/PIGB/PIGK/LPCAT3/PIP5K1A/CDS1/MTMR9/ABHD2/PIGS/GDE1/OSBPL8/MTMR4/PIP4K2C/SYNJ2/INPP5B/CDS2/FITM2/GK5/PIGM/SERINC5/MTMR10/LPGAT1/PIGG/ACSL3/PIP4K2B/SOCS…	110
BP	GO:0040029	regulation of gene expression, epigenetic	38/3781	105/18723	0.000101645	0.00243041	0.00197339	YTHDC1/TASOR/CTCF/ARID1A/SMARCA5/CGGBP1/SIRT1/HNRNPU/BAZ2A/RLIM/TPR/EP300/ARID4A/ZNF304/ATF7IP/SETDB1/PHF2/EXOSC10/ARID1B/FAM172A/PHF8/ZMIZ1/SMCHD1/MECP2/KDM1B/TDG/MPHOSPH8/CDYL/CREBZF/RESF1/BRCA1/EZH1/PCGF5/ZNFX1/DNMT1/SERTAD2/PPM1D/BMI1	38
BP	GO:2001022	positive regulation of response to DNA damage stimulus	38/3781	105/18723	0.000101645	0.00243041	0.00197339	DHX9/BCLAF1/ARID2/WDR48/RIF1/SIRT1/ERCC6/SLF2/PAXIP1/ATR/ABRAXAS1/KMT5B/SHLD2/SLF1/EYA3/PRKDC/FMR1/BRCC3/FXR1/SMCHD1/SPIRE1/ACTR2/RNF168/SPRED2/FAM168A/SPIDR/MAP3K20/SKIL/PARP1/BRCA1/ATM/TIMELESS/DTX3L/SPRED1/PLA2R1/PMAIP1/PARP9/FGF10	38
BP	GO:0043200	response to amino acid	41/3781	116/18723	0.000101857	0.00243041	0.00197339	CREB1/CHUK/LARS1/PIK3C3/UBR1/OPA1/MTOR/UBR2/ATP7A/UFL1/CPEB4/LAMTOR3/TMBIM6/IPO5/TOMM20/RRAGB/CPEB3/BCL2L2/RPTOR/GCLC/DNMT1/ALAD/GCLM/SH3BP4/AMIGO1/PDGFC/CDKN1B/GLRB/XBP1/PDGFD/SLC1A2/SOCS1/CYBA/COL5A2/SESN3/COL4A6/NTRK2/COL1A2/NEURL1/F7/SIX1	41
BP	GO:0002064	epithelial cell development	68/3781	220/18723	0.000102765	0.00244265	0.00198333	ATRX/SEC24B/CLOCK/ROCK1/FEM1B/VEZF1/ARID4A/PDPK1/GSK3B/PAFAH1B1/ABI2/YIPF6/EPB41L5/GRHL2/IQGAP1/MARVELD2/ASXL1/FNDC3A/FRS2/ADD1/SHROOM3/RAPGEF2/FLNB/TJP1/ZDHHC21/NOTCH2/RAP1B/HSD17B4/SIPA1L3/IL6ST/ARNTL/ROCK2/PLS1/VCL/SLC4A7/IFT74/AFDN/RFX3/IKBKB/YAP1/RAP2C/ARHGEF26/CLIC4/ESR1/GPAT4/FOSL2/PALLD/MYADM/RDX/CCDC88C/HEG1/PGR/PODXL/AR/S1PR3/PTPRS/FOXA1/LAMB2/FASN/WNT5A/STC1/RARA/FAT1/SLITRK6/SLC9A3R1/…	68
BP	GO:0048762	mesenchymal cell differentiation	72/3781	236/18723	0.000103297	0.00244588	0.00198595	TASOR/CLASP2/ROCK1/USF3/KLHL12/MTOR/CLASP1/GSK3B/DAG1/POLR1B/MAPK1/SMAD4/DLG5/PHACTR4/FBXL17/EPB41L5/SMAD2/CTNNB1/DDX17/FAM172A/BMPR1A/LRP6/NOLC1/BCL9L/SPRED2/ROCK2/ACVR1/TAPT1/SEMA4F/PTEN/SEMA3C/LDLRAD4/SMAD3/BCL2/KITLG/SEMA5A/ERBB4/SPRED1/PHLDB1/EDNRA/IL17RD/TGFBR1/PHLDB2/AXIN2/TBX3/GATA3/FERMT2/SEMA3F/SEMA4B/FOXA1/LAMA5/TIAM1/FGFR1/SEMA6D/WNT5A/FN1/CITED2/RET/PDCD4/TGFB3/TGFB2/RANBP3L/EPHA3/FG…	72
BP	GO:0000723	telomere maintenance	45/3781	131/18723	0.000104584	0.00245752	0.0019954	ATRX/RFC1/YLPM1/SMG1/RIF1/HNRNPU/ERCC4/DHX36/POT1/TNKS2/XRCC5/USP7/ATR/DCP2/SMG6/TNKS/DCLRE1A/MAPK1/NBN/SMC5/EXOSC10/CTNNB1/PRKDC/SLX4/XRN1/NEK7/WRN/NAF1/TFIP11/TERF1/RPA1/MRE11/GNL3L/PTGES3/MAP3K4/CTC1/TENT4B/PARP1/ATM/CCT2/HSP90AA1/CCNE2/BRCA2/DNA2/PKIB	45
BP	GO:0019827	stem cell population maintenance	45/3781	131/18723	0.000104584	0.00245752	0.0019954	REST/NIPBL/ZNF322/METTL14/CTR9/RIF1/ZC3H13/RAF1/CDC73/MED14/SMC3/RTF1/EIF4E/MED28/CNOT1/KDM3A/DDX6/MED12/SMC1A/SMC5/CTNNB1/SS18/MED21/BMPR1A/STAT3/NOTCH2/BCL9/CUL4A/LIG4/NCOA3/PCM1/WDR43/ZHX2/FOXO3/LEO1/SAV1/KLF10/HOOK3/YAP1/SOX4/TBX3/ZFP36L2/ASPM/TP63/FGF10	45
BP	GO:0043984	histone H4-K16 acetylation	12/3781	20/18723	0.000111199	0.00260307	0.00211358	SIRT1/PHF20/KANSL1/MSL2/KANSL2/ZMPSTE24/KANSL3/HCFC1/KMT2A/OGT/BRCA1/MSL1	12
BP	GO:0016049	cell growth	131/3781	482/18723	0.000113694	0.00265143	0.00215285	USP47/SIN3A/ADNP/DDX3X/KIAA1109/SIRT1/ITCH/SPG11/ADNP2/DIP2B/TRIM32/INO80/EIF4G2/CDC73/IMPACT/MTOR/GSK3B/PAFAH1B1/KMT2D/BMPR2/CRKL/EIF2AK4/MTPN/NCBP1/USP9X/TAF9B/SMAD4/GOLGA4/EPB41L5/MACF1/ADAM17/PPP3CB/IQGAP1/NME6/VGLL4/CDKN2AIP/CTNNB1/ABL1/ADAM10/CYFIP1/RAB21/ITGB1/RYK/RAPH1/ACVR1B/RNF6/TSG101/NIN/ITSN2/MEX3C/AKAP13/SPAG9/SHTN1/SMARCA2/N6AMT1/ARHGEF11/ULK2/RAB11A/RB1/MAP2K4/SEMA4F/VCL/RPTOR/CDK…	131
BP	GO:0010508	positive regulation of autophagy	43/3781	124/18723	0.000115411	0.00268136	0.00217715	PIK3C2A/SIRT1/SMCR8/ROCK1/ATF6/SPTLC1/RAB3GAP2/GSK3B/WAC/BECN1/UFL1/VPS13D/BCL2L11/TSC1/PIK3CB/LARP1/HTT/TBK1/FYCO1/CAMKK2/RAB3GAP1/MAP3K7/MID2/PAFAH1B2/PIP4K2C/MTDH/FOXO3/SCOC/PIP4K2B/SPTLC2/SVIP/BNIP3L/ATG16L1/TP53INP1/SH3BP4/CALCOCO2/ELAPOR1/PRKAA1/RNF152/PRKAA2/PLK2/SESN3/HSPB8	43
BP	GO:0043981	histone H4-K5 acetylation	10/3781	15/18723	0.000122505	0.00281442	0.00228519	PHF20/KANSL1/KANSL2/KANSL3/HCFC1/KAT7/JADE3/MEAF6/OGT/JADE2	10
BP	GO:0043982	histone H4-K8 acetylation	10/3781	15/18723	0.000122505	0.00281442	0.00228519	PHF20/KANSL1/KANSL2/KANSL3/HCFC1/KAT7/JADE3/MEAF6/OGT/JADE2	10
BP	GO:0060211	regulation of nuclear-transcribed mRNA poly(A) tail shortening	10/3781	15/18723	0.000122505	0.00281442	0.00228519	TNRC6A/CNOT1/TNRC6B/CPEB3/TENT4B/CNOT7/TNRC6C/TOB1/AGO2/BTG2	10
BP	GO:0030516	regulation of axon extension	35/3781	95/18723	0.000124738	0.00285512	0.00231823	SIN3A/ADNP/DIP2B/EIF4G2/GSK3B/PAFAH1B1/BMPR2/GOLGA4/MACF1/ABL1/CYFIP1/RAB21/RYK/RNF6/SHTN1/RAB11A/SEMA4F/CDKL5/SEMA3C/SEMA5A/SEMA3F/MAPT/SEMA4B/PTPRS/WNT3/MAP1B/SEMA6D/WNT5A/FN1/LRP1/NRCAM/APOE/OLFM1/SEMA3E/SEMA3B	35
BP	GO:0072583	clathrin-dependent endocytosis	21/3781	47/18723	0.000126155	0.00287555	0.00233482	WASL/SCYL2/HIP1/FNBP1L/GPR107/UBQLN2/FCHO2/AP2B1/PIK3CB/CANX/LMBRD1/SMAP1/ITSN2/ITSN1/BTBD8/NEU3/CLTC/BMP2K/INPP5F/DGKD/DNAJC6	21
BP	GO:0051225	spindle assembly	41/3781	117/18723	0.000126561	0.00287555	0.00233482	STAG2/CLASP2/CEP97/HNRNPU/TOGARAM1/VPS4B/KIF3B/INO80/KPNB1/TPR/KIF2A/SENP6/STAG1/CLASP1/SMC3/HAUS3/ABRAXAS1/ABRAXAS2/NCOR1/TNKS/DYNC1H1/HAUS2/CEP192/TUBGCP4/SMC1A/RNF4/CHMP2B/NEK7/MLH1/WASHC5/PIBF1/HAUS6/TUBGCP5/RAB11A/MAP9/NUMA1/RACGAP1/INCENP/KIF11/ASPM/MISP	41
BP	GO:1905477	positive regulation of protein localization to membrane	38/3781	106/18723	0.000127938	0.00289618	0.00235157	CNST/DLG1/PDPK1/KIF5B/RAB11FIP2/C2CD5/PRKCI/MAPK8/AP2B1/TCAF1/SSH1/EFCAB7/PTPN9/ATP2C1/NMT1/ITGB1/RAB11A/SPTBN1/SLC5A3/ACSL3/PLS1/ANK3/PRKCE/ATP2B4/PIK3R1/SORBS1/AKAP5/KCNJ11/MTCL1/STOM/ITGA3/ZDHHC2/LRP1/EPHA3/GZMB/PDZK1/AGR2/ERBB2	38
BP	GO:0010975	regulation of neuron projection development	122/3781	445/18723	0.000129836	0.00292841	0.00237774	ADNP/CAPRIN1/UBE3A/ATF1/KIDINS220/FBXO38/DIP2B/DHX36/THOC2/EIF4G2/TWF1/EP300/OPA1/MTOR/RRN3/GSK3B/PAFAH1B1/SETX/TMEM106B/ABI2/BMPR2/ARHGAP35/CRKL/PRKCI/FBXW8/PAK2/GOLGA4/MACF1/IQGAP1/BAG5/TSC1/TMEM30A/DENND5A/CERS2/CAMSAP2/PTPN9/ADAM10/CYFIP1/CBFA2T2/RAB21/WASHC5/RAPGEF2/DNM1L/RYK/LRIG2/RNF6/SCARB2/PSEN1/ABL2/TRAK1/NIN/CRK/ADCY6/ACTR2/SHTN1/NEDD4/EEF2K/ULK2/NFE2L2/PTPRF/RAB11A/NPTN/TRAK2/STK24/SK…	122
BP	GO:0010833	telomere maintenance via telomere lengthening	31/3781	81/18723	0.00013308	0.00299067	0.0024283	RFC1/HNRNPU/ERCC4/DHX36/POT1/TNKS2/XRCC5/ATR/DCP2/SMG6/TNKS/MAPK1/EXOSC10/CTNNB1/SLX4/XRN1/NEK7/NAF1/TERF1/RPA1/MRE11/GNL3L/PTGES3/MAP3K4/CTC1/TENT4B/PARP1/ATM/CCT2/HSP90AA1/PKIB	31
BP	GO:0001838	embryonic epithelial tube formation	42/3781	121/18723	0.000134411	0.00300964	0.0024437	SEC24B/MIB1/SETD2/HECTD1/OPA1/TRAF6/ARHGAP35/PHACTR4/MED12/GRHL2/TSC1/CTNNB1/ABL1/SHROOM3/SUFU/BRD2/LUZP1/CC2D2A/KIF20B/BBS4/TCTN1/TULP3/STK4/SIX4/CELSR1/STK3/SOX4/FZD3/GATA3/SDC4/FZD6/STIL/LRP2/WNT5A/CITED2/RET/TGFB2/RARA/COBL/GREM1/PRKACB/SIX1	42
BP	GO:0060996	dendritic spine development	36/3781	99/18723	0.000136762	0.00305122	0.00247746	CAPRIN1/UBE3A/WASL/DHX36/EIF4G2/OPA1/MTOR/PAFAH1B1/ABI2/PAK2/DLG5/ADAM10/FMR1/DNM1L/UBA6/PSEN1/ACTR2/IQSEC1/ITSN1/EEF2K/MAPK6/CPEB3/CDKL5/PTEN/ASAP1/PPP1R9A/TANC2/ZMYND8/PDLIM5/PTPRS/TIAM1/PLK2/CTNND2/SRCIN1/APOE/NEURL1	36
BP	GO:0033674	positive regulation of kinase activity	127/3781	467/18723	0.000139508	0.0031013	0.00251812	CCNT1/PIK3R4/ALS2/ADNP/DDX3X/SIRT1/ERCC6/TAOK1/ZFP91/LMTK2/WNK1/RICTOR/XRCC5/DLG1/DSTYK/PDPK1/MTOR/RANBP2/TRAF6/DAG1/PRRC1/ETAA1/CCNT2/BMPR2/AMBRA1/PAK2/GCN1/ATG14/NBN/ADAM17/PRLR/IQGAP1/PIK3CA/ABL1/CACUL1/CCNK/MADD/RAPGEF2/RYK/CAB39/BMPR1A/DAZAP2/KRAS/MAP3K7/PSEN1/TAOK3/TOM1L1/MRE11/PIBF1/LAMTOR3/MOB1B/AKAP13/OSBPL8/MAP3K4/PTK2/TAB2/TIRAP/PDCD10/ECT2/SNX9/STK4/RPTOR/PKD2/VAV2/ERBB3/IRS1/THBS1/PP…	127
BP	GO:0051053	negative regulation of DNA metabolic process	43/3781	125/18723	0.000141969	0.00313346	0.00254423	TP53BP1/RIF1/HNRNPU/TRIP12/ERCC4/UBR5/MSH3/ERCC6/POT1/TNKS2/XRCC5/DCP2/SMG6/BMPR2/TNKS/RNF169/SHLD2/NBN/EXOSC10/KMT2A/SLX4/XRN1/MLH1/SMCHD1/TFIP11/TERF1/MSH6/NDFIP1/GNL3L/NMNAT1/CTC1/MSH2/KLHL15/TENT4B/ZNF91/OTUB2/PARP1/HELB/ATM/UBQLN4/DACH1/GATA3/GJA1	43
BP	GO:1904375	regulation of protein localization to cell periphery	43/3781	125/18723	0.000141969	0.00313346	0.00254423	APPL1/HECTD1/CNST/DLG1/PDPK1/KIF5B/RAB11FIP2/DAG1/PRKCI/EPB41/EFCAB7/PTPN9/ADAM10/LZTFL1/ATP2C1/ITGB1/LYPLA1/GOPC/RAB11A/SPTBN1/ACSL3/PLS1/NUMA1/CLTC/PPFIA1/PRKCE/ATP2B4/PPP2R5A/ABCA2/PIK3R1/SORBS1/AKAP5/AR/KCNJ11/EPB41L2/ITGA3/ZDHHC2/LRP1/EPHA3/GPC4/MISP/AGR2/LRRC15	43
BP	GO:1902904	negative regulation of supramolecular fiber organization	54/3781	167/18723	0.000142688	0.00313813	0.00254803	APC/CLASP2/GMFB/TWF1/TAOK1/CLASP1/ARFGEF1/CAPZA2/CAMSAP1/MTPN/DYRK1A/PAK2/TTBK2/SMAD4/SSH1/PIK3CA/CAMSAP2/ADD1/EPS8/TMOD3/SPTAN1/TJP1/ATXN7/HSPA8/LIMA1/HDGFL3/SPTBN1/CARMIL1/WASF2/SSH2/PPFIA1/PPP1R9A/SWAP70/CKAP2/FKBP4/CRACD/SVIL/MYADM/PHLDB2/RDX/PIK3R1/RHPN2/SLIT2/TMSB10/FHOD3/SSH3/CGNL1/MAP1B/INPP5J/LDLR/ADD3/NAV3/BMERB1/APOE	54
BP	GO:0031062	positive regulation of histone methylation	19/3781	41/18723	0.000144949	0.00317653	0.00257921	CTR9/RIF1/SIRT1/RNF20/PAXIP1/ZNF304/KMT2E/RTF1/SMAD4/CTNNB1/KMT2A/MECP2/PAXBP1/OGT/NSD3/BRCA1/JARID2/DNMT1/MYB	19
BP	GO:0035148	tube formation	49/3781	148/18723	0.000149703	0.00324196	0.00263233	SEC24B/MIB1/SETD2/HECTD1/OPA1/TRAF6/ARHGAP35/PHACTR4/CEP290/MED12/GRHL2/BCL2L11/TSC1/CTNNB1/ABL1/SHROOM3/SUFU/SDCCAG8/BRD2/LUZP1/CC2D2A/KIF20B/BBS4/TCTN1/TULP3/STK4/SIX4/CELSR1/STK3/BCAS3/SOX4/FZD3/GATA3/PODXL/SDC4/FZD6/STIL/LRP2/WNT5A/CITED2/RET/TGFB2/RARA/COBL/FGFR2/GREM1/PRKACB/FGF10/SIX1	49
BP	GO:0043484	regulation of RNA splicing	49/3781	148/18723	0.000149703	0.00324196	0.00263233	RBM12/YTHDC1/REST/HNRNPK/THRAP3/SON/SRSF10/NUP98/CELF1/RBM12B/HNRNPU/SRPK2/SETX/POLR2A/SRSF1/RBM23/NCBP1/DYRK1A/RBM22/DDX17/PTBP3/FAM172A/RBM25/METTL16/RBM39/RBFOX2/RBMXL1/FMR1/FXR1/AHNAK/ZNF326/HNRNPH2/HNRNPF/HNRNPLL/SLC38A2/TMBIM6/NSRP1/HSPA8/HNRNPH1/CDK12/RAVER1/ESRP1/MBNL2/ERN1/RBM11/PIK3R1/RBM24/AHNAK2/NOVA1	49
BP	GO:0030433	ubiquitin-dependent ERAD pathway	32/3781	85/18723	0.000150032	0.00324196	0.00263233	MARCHF6/UBE4A/UBQLN1/DNAJB14/UBXN4/FAF2/UBQLN2/TMEM67/EDEM3/ECPAS/ERLIN1/SEL1L/UBE4B/EDEM1/USP19/JKAMP/CANX/STT3B/ERLEC1/FAM8A1/DNAJC10/NFE2L2/ERLIN2/USP14/CCDC47/SVIP/TRIM25/AMFR/WFS1/MAN1A1/CLGN/NCCRP1	32
BP	GO:2000779	regulation of double-strand break repair	32/3781	85/18723	0.000150032	0.00324196	0.00263233	SETD2/TP53BP1/ARID2/WDR48/RIF1/TRIP12/UBR5/ERCC6/SLF2/PPP4R2/POT1/RNF169/KMT5B/SHLD2/SLF1/PRKDC/SMCHD1/TFIP11/SPIRE1/ACTR2/NSD2/KLHL15/SPIDR/OTUB2/PARP1/FIGNL1/HELB/UBQLN4/TIMELESS/DTX3L/DEK/PARP9	32
BP	GO:0032205	negative regulation of telomere maintenance	17/3781	35/18723	0.000157627	0.00338241	0.00274638	HNRNPU/ERCC4/POT1/TNKS2/DCP2/SMG6/TNKS/NBN/EXOSC10/SLX4/XRN1/TERF1/GNL3L/CTC1/TENT4B/PARP1/ATM	17
BP	GO:0071108	protein K48-linked deubiquitination	17/3781	35/18723	0.000157627	0.00338241	0.00274638	USP37/USP8/USP34/USP7/OTUD4/USP33/USP9X/OTUD7B/MINDY2/USP19/VCPIP1/OTUD3/OTUB2/USP13/USP25/MINDY3/MINDY1	17
BP	GO:0046856	phosphatidylinositol dephosphorylation	16/3781	32/18723	0.0001595	0.00341076	0.00276939	SACM1L/MTMR1/OCRL/MTMR12/MTMR6/SYNJ1/MTM1/MTMR9/MTMR4/SYNJ2/INPP5B/MTMR10/INPP4B/PTEN/INPP5F/INPP5J	16
BP	GO:0036503	ERAD pathway	38/3781	107/18723	0.000160209	0.00341412	0.00277212	MARCHF6/UBE4A/UBQLN1/DNAJB14/UBXN4/FAF2/UBQLN2/RHBDD1/TMEM67/EDEM3/ECPAS/ERLIN1/UGGT1/SEL1L/UBE4B/EDEM1/USP19/JKAMP/CANX/UGGT2/STT3B/ERLEC1/FAM8A1/DNAJC10/NFE2L2/ERLIN2/USP14/RNF139/USP13/CCDC47/SVIP/USP25/TRIM25/AMFR/WFS1/MAN1A1/CLGN/NCCRP1	38
BP	GO:0031669	cellular response to nutrient levels	66/3781	215/18723	0.000160816	0.00341527	0.00277305	PIK3R4/SIRT1/LARS1/PIK3C3/IMPACT/FNIP1/TNRC6A/MTOR/VPS41/USP33/BMPR2/EIF2AK4/TNKS/BECN1/MAPK1/MAPK8/GCN1/ATG14/TSC1/ATP2B1/WRN/XPR1/DNM1L/CPEB4/MIOS/EIF2S1/NCOA1/SLC38A2/CBL/EIF2AK3/ZFYVE1/HSPA8/NFE2L2/TRIM24/FOXO3/RRAGB/EIF2AK2/STK24/RPTOR/LAMP2/MED1/KLF10/NUAK1/MDM2/BCL2/PDK2/PPM1D/KANK2/GLUL/ELAPOR1/WIPI1/XBP1/PRKAA1/RNF152/PMAIP1/PRKAA2/HFE/POSTN/BRIP1/GDAP1/STK26/SESN3/SREBF1/LCN2/TNC/PDK4	66
BP	GO:0018209	peptidyl-serine modification	96/3781	338/18723	0.000169236	0.00358178	0.00290825	TAF1/CSNK1G3/CSNK1A1/SMG1/PKN2/CSNK1G1/CHUK/HIPK1/RAF1/SRPK2/LATS1/ROCK1/NSD1/UHMK1/FNIP1/LMTK2/WNK1/RICTOR/TOP1/PDPK1/MTOR/PIKFYVE/TLK1/GSK3B/ATR/MORC3/GGNBP2/PRKCI/AKAP9/TNKS/DYRK1A/PAK2/TTBK2/HIPK3/MAPK1/MAPK14/MAPK8/PIK3CA/BRAF/TBK1/PRKDC/CAB39/DOCK7/EIF2AK3/MAPK9/CREBL2/ULK2/NLK/RPS6KA5/PDCD10/ROCK2/STK4/PARP1/RPTOR/TLK2/GALNT1/PTEN/ATM/PDK3/BAG4/GPD1L/TSSK4/FNIP2/BCL2/INPP5F/PAQR3/VRK2/RPS6…	96
BP	GO:0060602	branch elongation of an epithelium	11/3781	18/18723	0.000172926	0.00360426	0.00292651	SIX4/MED1/YAP1/ESR1/WNT5A/FGF1/FGFR2/TNC/AREG/FGF10/SIX1	11
BP	GO:0071786	endoplasmic reticulum tubular network organization	11/3781	18/18723	0.000172926	0.00360426	0.00292651	RAB3GAP2/LNPK/TMEM33/RAB3GAP1/RAB10/REEP3/RAB18/ATL3/ARL6IP1/ATL1/REEP1	11
BP	GO:0080182	histone H3-K4 trimethylation	11/3781	18/18723	0.000172926	0.00360426	0.00292651	CTR9/ARID4A/KMT2D/KMT2E/RTF1/WDR82/TET2/SETD1B/KMT2A/TET3/OGT	11
BP	GO:1900151	regulation of nuclear-transcribed mRNA catabolic process, deadenylation-dependent decay	11/3781	18/18723	0.000172926	0.00360426	0.00292651	DHX36/CNOT1/RC3H1/TNRC6B/CPEB3/TENT4B/CNOT7/TNRC6C/TOB1/AGO2/ZFP36L2	11
BP	GO:1904888	cranial skeletal system development	27/3781	68/18723	0.000173215	0.00360426	0.00292651	NIPBL/SETD2/CRKL/WDR19/MED12/GRHL2/SMAD2/CTNNB1/RIC1/GLI3/NDST1/RAB23/TULP3/SIX4/SMAD3/IFT140/FOXN3/IRF6/TGFBR1/MMP16/TFAP2A/TGFB3/TGFB2/FGFR2/MSX2/TP63/SIX1	27
BP	GO:0071897	DNA biosynthetic process	57/3781	180/18723	0.000177533	0.00368172	0.0029894	RFC1/POLK/SIRT1/HNRNPU/PRIMPOL/POT1/TNKS2/XRCC5/ATR/REV1/DCP2/SMG6/POLA1/BMPR2/RCHY1/TNKS/ZBTB1/MAPK1/GRHL2/EXOSC10/CTNNB1/XRN1/NEK7/WRN/NAF1/LIG3/TERF1/POLI/RPA1/MRE11/REV3L/SPRTN/USP10/GNL3L/LIG4/PTGES3/MAP3K4/CTC1/RFC5/PARP4/TENT4B/ATM/CCT2/NVL/POLD3/HSP90AA1/RFC3/LIN9/DACH1/DDX39B/GJA1/DTL/PDGFRB/CENPF/GREM1/LOX/PKIB	57
BP	GO:0060213	positive regulation of nuclear-transcribed mRNA poly(A) tail shortening	9/3781	13/18723	0.000178507	0.00368954	0.00299574	TNRC6A/CNOT1/TNRC6B/CPEB3/CNOT7/TNRC6C/TOB1/AGO2/BTG2	9
BP	GO:0051028	mRNA transport	44/3781	130/18723	0.000181997	0.00374914	0.00304414	DHX9/YTHDC1/SETD2/SMG1/NUP98/NUP58/NUP133/XPO1/THOC2/G3BP2/SENP2/TPR/RANBP2/MCM3AP/SMG6/POM121/NUP160/LRPPRC/SRSF1/TNKS/NCBP1/NUP153/NUP155/FYTTD1/SMG7/NCBP3/FMR1/AHCTF1/GLE1/NUP54/NUP188/NUP50/NUP205/SUPT6H/NDC1/PARP11/NUP42/UPF2/NUP107/CASC3/NUP210/NXT2/DDX39B/KIF5C	44
BP	GO:0098727	maintenance of cell number	45/3781	134/18723	0.000189626	0.00389333	0.00316121	REST/NIPBL/ZNF322/METTL14/CTR9/RIF1/ZC3H13/RAF1/CDC73/MED14/SMC3/RTF1/EIF4E/MED28/CNOT1/KDM3A/DDX6/MED12/SMC1A/SMC5/CTNNB1/SS18/MED21/BMPR1A/STAT3/NOTCH2/BCL9/CUL4A/LIG4/NCOA3/PCM1/WDR43/ZHX2/FOXO3/LEO1/SAV1/KLF10/HOOK3/YAP1/SOX4/TBX3/ZFP36L2/ASPM/TP63/FGF10	45
BP	GO:0046661	male sex differentiation	53/3781	165/18723	0.000197423	0.00403154	0.00327344	SMAD5/ATRX/WDR48/KDM5A/ARID4A/TMF1/CRKL/NCOA4/SMAD4/BCL2L11/RNF38/CTNNA1/RRM1/CTNNB1/FNDC3A/BMPR1A/AGO4/NCOA1/CBL/CSDE1/HSD17B4/SGPL1/MSH2/BCL2L2/SIX4/HMGCS1/BCL2/PATZ1/KITLG/STAT5B/CCND1/ESR1/TGFBR1/GREB1L/RHOBTB3/ARID5B/TBX3/GATA3/AR/LGR4/BRIP1/INHBA/TLR3/DHCR24/LRP2/PDGFRB/WNT5A/CITED2/TGFB2/ASPM/SYCP2/RARA/FGF10	53
BP	GO:0010824	regulation of centrosome duplication	20/3781	45/18723	0.00019859	0.00403154	0.00327344	SIRT1/VPS4B/XPO1/PDCD6IP/ALMS1/CEP120/TMEM67/CEP295/CHMP3/CHMP2B/MDM1/TRIM37/CEP76/CDK5RAP2/ROCK2/BRCA1/RAB6C/PLK4/STIL/PLK2	20
BP	GO:0098534	centriole assembly	20/3781	45/18723	0.00019859	0.00403154	0.00327344	CCP110/VPS4B/ALMS1/CEP44/CEP120/KIAA0753/CEP192/CEP135/CEP295/MDM1/SASS6/POC1B/TRIM37/CEP76/C2CD3/CDK5RAP2/BRCA1/PLK4/STIL/PLK2	20
BP	GO:0006446	regulation of translational initiation	30/3781	79/18723	0.000199365	0.00403154	0.00327344	DDX3X/UHMK1/EIF4G2/YTHDF3/IMPACT/DHX29/TPR/MTOR/EIF4G3/EIF2AK4/NCBP1/PPP1R15B/LARP1/EIF4B/PAIP2/EIF5/PAIP1/FMR1/GLE1/EIF2S1/EIF2AK3/EIF4EBP2/CSDE1/EIF4A2/EIF2AK2/DNAJC3/RPS6KB1/PAIP2B/AGO2/CCL5	30
BP	GO:0007173	epidermal growth factor receptor signaling pathway	38/3781	108/18723	0.00019962	0.00403154	0.00327344	PIK3C2A/ERBIN/PTPN11/SOCS4/PDPK1/HIP1/FER/ADAM17/IQGAP1/PIK3CA/GAB1/SNX6/BRAF/ABL1/PTPN12/SOCS5/PSEN1/TSG101/CBL/SOS1/KIF16B/PTK2/RPS6KA5/DUSP3/NEU3/PTPN3/SHC1/GRB2/REPS2/CDH13/DGKD/BCAR3/AFAP1L2/GPRC5A/AGR2/AREG/NEURL1/EFEMP1	38
BP	GO:0017148	negative regulation of translation	73/3781	245/18723	0.000208446	0.00419538	0.00340647	GIGYF2/PUM1/DCP1A/METTL14/IREB2/DDX3X/HNRNPR/CNOT6/CELF1/CAPRIN1/ROCK1/DHX36/YTHDF3/TPR/TNRC6A/PDE12/DCP2/CNOT6L/RC3H2/EIF4E/EIF2AK4/CNOT1/DIS3/DDX6/TSC1/LARP1/PAN2/AGO1/PAIP2/CNOT8/PAN3/METTL16/XRN1/FMR1/FXR1/MLH1/RC3H1/PURA/TUT7/CPEB4/AGO4/AGO3/STAT3/EIF2S1/EIF2AK3/EIF4EBP2/SYNCRIP/TNRC6B/ROCK2/RNF139/CPEB3/EIF2AK2/CPEB2/FTO/TENT4B/EPRS1/CNOT7/TNRC6C/SRP9/PATL1/DHFR/PUS7/NOCT/PAIP2B/ENC1/TOB1/A…	73
BP	GO:1904951	positive regulation of establishment of protein localization	91/3781	319/18723	0.00020909	0.00419538	0.00340647	CTDSPL2/CNST/EXOC1/ICE1/UBR5/HUWE1/TPR/GSK3B/KIF5B/C2CD5/XPO4/OSBP/CEP120/UBE2D3/CD2AP/CEP135/NPEPPS/RBM22/MAPK1/MAPK14/MAPK8/CEP295/CEP290/PPP3CB/TCAF1/TMEM30A/TM9SF4/EFCAB7/PPID/MYH10/EDEM1/ATP2C1/NMT1/DNM1L/PSEN1/TSG101/GOLPH3/IPO5/PCM1/TMED10/SYTL4/KIF20B/GLI3/PDCD10/ECT2/LEPROT/ACSL3/MAVS/GLUD1/TM7SF3/PFKM/SORL1/MDM2/CCT2/SMAD3/TMEM30B/UNC13B/GOLPH3L/BCAS3/ANK3/PRKCE/ADAM9/MYRIP/GLUL/ABAT/AN…	91
BP	GO:0033962	P-body assembly	12/3781	21/18723	0.000211781	0.00422195	0.00342804	CNOT6/ATXN2/CNOT6L/CNOT1/DYNC1H1/DDX6/PAN2/PAN3/RC3H1/CNOT7/PATL1/NOCT	12
BP	GO:0046599	regulation of centriole replication	12/3781	21/18723	0.000211781	0.00422195	0.00342804	VPS4B/ALMS1/CEP120/CEP295/MDM1/TRIM37/CEP76/CDK5RAP2/BRCA1/PLK4/STIL/PLK2	12
BP	GO:0007018	microtubule-based movement	106/3781	382/18723	0.000213067	0.00423394	0.00343777	ASH1L/FBXW11/HNRNPU/SPG11/IFT81/COPG2/KIF3B/TTC26/WDR35/KPNB1/AP3B1/AP3M1/KIF3A/KIF2A/OPA1/TRAF3IP1/PAFAH1B1/KIF5B/RHOT1/TMF1/BLOC1S6/DYNC1LI2/DYNC1I2/LRPPRC/KTN1/DYNC1H1/SPAST/VPS13A/WDR19/ARL8B/HTT/TTC21B/TTC30B/FYCO1/LCA5/RAB21/DYNC2H1/BBS2/TTC30A/KIF13A/PURA/KATNIP/KIFAP3/CILK1/TRAK1/ACTR2/DYNC2LI1/IFT88/KIF27/DYNLT3/DYNC2I1/NDE1/BBS12/INPP5B/RPGR/PCM1/KIF16B/KIF1B/KIF20B/HSPA8/SSX2IP/BBS4/TR…	106
BP	GO:0016601	Rac protein signal transduction	19/3781	42/18723	0.000214886	0.00424279	0.00344497	ALS2/FARP2/NCKAP1/ABI2/PIK3CB/HACD3/CYFIP1/EPS8/KBTBD7/KBTBD6/KRAS/CRK/HACE1/SSX2IP/GARRE1/WASF2/OGT/CDH13/TIAM1	19
BP	GO:0090503	RNA phosphodiester bond hydrolysis, exonucleolytic	19/3781	42/18723	0.000214886	0.00424279	0.00344497	CNOT6/XRN2/ERI2/PDE12/DCP2/CNOT6L/EXD2/CNOT1/DIS3/ANGEL2/EXOSC10/PAN2/CNOT8/PAN3/XRN1/DIS3L/ANGEL1/CNOT7/NOCT	19
BP	GO:0006403	RNA localization	62/3781	201/18723	0.000215621	0.00424376	0.00344575	DHX9/YTHDC1/SETD2/SMG1/NUP98/CPSF6/PHAX/HNRNPU/NUP58/NUP133/XPO1/DHX36/THOC2/G3BP2/SENP2/TPR/ATR/RANBP2/ATXN2/MCM3AP/DCP2/SMG6/POM121/NUP160/LRPPRC/SRSF1/TNKS/NCBP1/NUP153/NUP155/FYTTD1/SMG7/EXOSC10/TSC1/CKAP5/NCBP3/SHQ1/FMR1/AHCTF1/GLE1/NAF1/NUP54/TERF1/NUP188/NUP50/NUP205/SUPT6H/NDC1/TOMM20/PARP11/NUP42/UPF2/NUP107/CASC3/NUP210/ATM/CCT2/XPOT/NXT2/DDX39B/SIDT1/KIF5C	62
BP	GO:0051222	positive regulation of protein transport	87/3781	303/18723	0.000224486	0.00439506	0.0035686	CTDSPL2/CNST/EXOC1/ICE1/UBR5/HUWE1/TPR/GSK3B/KIF5B/C2CD5/XPO4/OSBP/UBE2D3/CD2AP/NPEPPS/RBM22/MAPK1/MAPK14/MAPK8/CEP290/PPP3CB/TCAF1/TMEM30A/TM9SF4/EFCAB7/PPID/MYH10/EDEM1/ATP2C1/NMT1/DNM1L/PSEN1/TSG101/GOLPH3/IPO5/PCM1/TMED10/SYTL4/KIF20B/GLI3/PDCD10/ECT2/LEPROT/ACSL3/MAVS/GLUD1/TM7SF3/PFKM/SORL1/MDM2/SMAD3/TMEM30B/UNC13B/GOLPH3L/BCAS3/ANK3/PRKCE/ADAM9/MYRIP/GLUL/ABAT/ANO1/MYO18A/PIK3R1/SOX4/PRKA…	87
BP	GO:0035967	cellular response to topologically incorrect protein	40/3781	116/18723	0.000224731	0.00439506	0.0035686	CUL3/ATF6/QRICH1/MBTPS2/EP300/DNAJB14/RHBDD1/UFL1/BCL2L11/PPP1R15B/UGGT1/TMEM33/UBE2W/UGGT2/EIF2S1/ERLEC1/MBTPS1/TMBIM6/HSPA13/EIF2AK3/HSPA9/ABCB10/VAPB/HSPA8/NFE2L2/ERMP1/KLHL15/EIF2AK2/TM7SF3/TMTC4/PTPN1/AMFR/WFS1/CCND1/ERN1/PIK3R1/XBP1/AGR2/HSPB8/HSPA2	40
BP	GO:0001101	response to acid chemical	45/3781	135/18723	0.000229517	0.00446238	0.00362326	CREB1/ATF2/CHUK/LARS1/PIK3C3/UBR1/OPA1/MTOR/UBR2/ATP7A/UFL1/PIK3CA/CPEB4/LAMTOR3/TMBIM6/IPO5/TOMM20/RRAGB/CPEB3/BCL2L2/RPTOR/PKD2/GCLC/DNMT1/ALAD/GCLM/ATP2B4/SH3BP4/AMIGO1/PDGFC/CDKN1B/GLRB/XBP1/PDGFD/SLC1A2/SOCS1/CYBA/COL5A2/SESN3/COL4A6/NTRK2/COL1A2/NEURL1/F7/SIX1	45
BP	GO:0046326	positive regulation of glucose import	18/3781	39/18723	0.00022997	0.00446238	0.00362326	APPL1/PTPN11/ARPP19/PRKCI/MAPK14/OCLN/OSBPL8/RNASEL/CREBL2/MEF2A/NFE2L2/ADIPOR2/IRS1/INSR/PIK3R1/SORBS1/SLC1A2/GPC3	18
BP	GO:0007004	telomere maintenance via telomerase	27/3781	69/18723	0.00023034	0.00446238	0.00362326	RFC1/HNRNPU/POT1/TNKS2/XRCC5/ATR/DCP2/SMG6/TNKS/MAPK1/EXOSC10/CTNNB1/XRN1/NEK7/NAF1/TERF1/RPA1/MRE11/GNL3L/PTGES3/MAP3K4/CTC1/TENT4B/ATM/CCT2/HSP90AA1/PKIB	27
BP	GO:0060485	mesenchyme development	84/3781	291/18723	0.000235873	0.00455529	0.0036987	TASOR/CLASP2/ROCK1/NUP133/USF3/KLHL12/MTOR/CLASP1/GSK3B/EXOC4/DAG1/POLR1B/BMPR2/MAPK1/SMAD4/DLG5/PHACTR4/FBXL17/EPB41L5/SMAD2/CTNNB1/DDX17/FAM172A/BMPR1A/LRP6/NOLC1/BCL9L/SPRED2/ROCK2/ACVR1/TAPT1/SEMA4F/SIX4/DCHS1/PKD2/PTEN/SEMA3C/MDM2/LDLRAD4/SMAD3/BCL2/MDM4/KITLG/YAP1/SEMA5A/ERBB4/SPRED1/PHLDB1/EDNRA/IL17RD/TGFBR1/PHLDB2/AXIN2/TBX3/GATA3/FERMT2/SEMA3F/SEMA4B/FOXA1/LAMA5/TIAM1/FGFR1/PDGFRB/SEMA6…	84
BP	GO:1901879	regulation of protein depolymerization	32/3781	87/18723	0.00024704	0.0047561	0.00386175	APC/CLASP2/TWF1/TAOK1/CLASP1/CAPZA2/CAMSAP1/MTPN/TTBK2/SPAST/PIK3CA/CAMSAP2/ADD1/EPS8/TMOD3/SPTAN1/ATXN7/LIMA1/HDGFL3/SPTBN1/CARMIL1/SWAP70/CKAP2/CRACD/SEMA5A/SVIL/MAP1A/RDX/MAP1B/ADD3/NAV3/BMERB1	32
BP	GO:0017038	protein import	63/3781	206/18723	0.000250823	0.00475946	0.00386447	TNPO1/IPO11/APPL1/IPO8/NUP98/IPO7/NUP58/UBR5/NUP133/PEX1/KPNB1/KPNA1/TPR/KPNA6/RANBP2/FAM53C/POM121/NUP153/NUP155/RBM22/MAPK1/TOMM70/MAPK14/IPO9/APPL2/EFCAB7/RANBP6/NUP54/GRPEL2/NUP188/PSEN1/SUFU/TNPO3/STAT3/NUP50/KPNA3/PEX12/PEX19/IPO5/HSPA4/NOLC1/HSPA8/TOMM20/GLI3/ECT2/RAB23/PEX2/MAVS/NUP107/LONP2/PEX5/LAMP2/MED1/SMAD3/CSE1L/HSP90AA1/NXT2/CRY2/RAB8B/PIK3R1/PPP3CA/CDH1/APOE	63
BP	GO:0034454	microtubule anchoring at centrosome	8/3781	11/18723	0.00025133	0.00475946	0.00386447	KIF3A/GSK3B/DCTN1/NIN/PCM1/BBS4/HOOK3/CEP19	8
BP	GO:0099022	vesicle tethering	8/3781	11/18723	0.00025133	0.00475946	0.00386447	TRIP11/EXOC4/EXOC6B/TBC1D23/WDR11/EXOC6/FAM91A1/C17orf75	8
BP	GO:1904357	negative regulation of telomere maintenance via telomere lengthening	14/3781	27/18723	0.000251447	0.00475946	0.00386447	HNRNPU/ERCC4/POT1/TNKS2/DCP2/TNKS/EXOSC10/SLX4/XRN1/TERF1/GNL3L/CTC1/TENT4B/PARP1	14
BP	GO:0006891	intra-Golgi vesicle-mediated transport	16/3781	33/18723	0.000251835	0.00475946	0.00386447	COPG2/GOSR1/COPB1/COG5/COG2/RAB33B/TRAPPC10/COG6/COG3/COPB2/NAPG/NSF/COPA/GOLGA5/COG1/RAB6C	16
BP	GO:1902275	regulation of chromatin organization	16/3781	33/18723	0.000251835	0.00475946	0.00386447	TASOR/SPTY2D1/HNRNPU/TPR/TLK1/SETD5/ZNF304/ATF7IP/SETDB1/PHF2/PHF8/MPHOSPH8/RESF1/TLK2/DNMT1/MLLT3	16
BP	GO:0045070	positive regulation of viral genome replication	15/3781	30/18723	0.000255432	0.00481271	0.00390771	TOP2B/DDX3X/PKN2/SRPK2/PDE12/LARP1/HACD3/PPID/ADAR/DDB1/STAU1/VAPB/CNOT7/TOP2A/CCL5	15
BP	GO:0099518	vesicle cytoskeletal trafficking	28/3781	73/18723	0.000264112	0.00496113	0.00402822	FBXW11/WASL/KIF3B/MYO6/AP3B1/AP3M1/KIF3A/PAFAH1B1/KIF5B/FNBP1L/BLOC1S6/DYNC1H1/CCDC186/HTT/FYCO1/MYO5C/KIF13A/MYO5B/KIFAP3/TRAK1/NDE1/TRAK2/MYO5A/AP3M2/MYO1D/TANC2/MYO1B/SYBU	28
BP	GO:0043547	positive regulation of GTPase activity	75/3781	255/18723	0.000267065	0.00500139	0.00406092	ALS2/NF1/RABGAP1/RALGAPB/LARS1/TBC1D5/RALGAPA1/TBC1D15/TBC1D14/GSK3B/RAB11FIP2/RASA1/CRKL/TBCK/SNX13/EVI5/TBC1D12/MYO9A/TSC1/ASAP2/ELMOD2/EIF5/RAB3GAP1/PKP4/RAPGEF2/DOCK9/ITGB1/MMUT/RGP1/SNX18/PIP5K1A/CRK/RIC1/IQSEC1/DOCK7/RALBP1/TBC1D9B/SIPA1L3/ECT2/SYDE2/RUNDC1/SNX9/TBC1D8B/TBC1D9/CDKL5/ASAP1/AFDN/ARHGAP29/TBC1D2B/BCAS3/RALGAPA2/CCDC125/RAP1GDS1/ARHGEF26/GARNL3/TBC1D16/PREX1/TBC1D8/F2R/ARHGAP42…	75
BP	GO:0001841	neural tube formation	36/3781	102/18723	0.000270566	0.00505165	0.00410173	SEC24B/MIB1/SETD2/HECTD1/OPA1/TRAF6/ARHGAP35/PHACTR4/MED12/GRHL2/TSC1/ABL1/SHROOM3/SUFU/BRD2/LUZP1/CC2D2A/KIF20B/BBS4/TCTN1/TULP3/STK4/CELSR1/STK3/SOX4/FZD3/SDC4/FZD6/STIL/LRP2/WNT5A/CITED2/TGFB2/RARA/COBL/PRKACB	36
BP	GO:0050657	nucleic acid transport	52/3781	163/18723	0.000272298	0.00505346	0.0041032	DHX9/YTHDC1/SETD2/SMG1/NUP98/CPSF6/PHAX/NUP58/NUP133/XPO1/THOC2/G3BP2/SENP2/TPR/RANBP2/ATXN2/MCM3AP/SMG6/POM121/NUP160/LRPPRC/SRSF1/TNKS/NCBP1/NUP153/NUP155/FYTTD1/SMG7/TSC1/CKAP5/NCBP3/FMR1/AHCTF1/GLE1/NUP54/NUP188/NUP50/NUP205/SUPT6H/NDC1/TOMM20/PARP11/NUP42/UPF2/NUP107/CASC3/NUP210/XPOT/NXT2/DDX39B/SIDT1/KIF5C	52
BP	GO:0050658	RNA transport	52/3781	163/18723	0.000272298	0.00505346	0.0041032	DHX9/YTHDC1/SETD2/SMG1/NUP98/CPSF6/PHAX/NUP58/NUP133/XPO1/THOC2/G3BP2/SENP2/TPR/RANBP2/ATXN2/MCM3AP/SMG6/POM121/NUP160/LRPPRC/SRSF1/TNKS/NCBP1/NUP153/NUP155/FYTTD1/SMG7/TSC1/CKAP5/NCBP3/FMR1/AHCTF1/GLE1/NUP54/NUP188/NUP50/NUP205/SUPT6H/NDC1/TOMM20/PARP11/NUP42/UPF2/NUP107/CASC3/NUP210/XPOT/NXT2/DDX39B/SIDT1/KIF5C	52
BP	GO:0043401	steroid hormone mediated signaling pathway	45/3781	136/18723	0.000276801	0.00512165	0.00415856	ARID1A/CLOCK/SIRT1/UBE3A/UBR5/LATS1/EP300/STRN3/KMT2D/TMF1/NCOR1/CNOT1/KDM3A/UFL1/NCOA4/DDX17/CRY1/RNF14/RBFOX2/ZMIZ1/UFSP2/RNF6/ABHD2/NEDD4/PTGES3/ARNTL/PARP1/BRCA1/MED1/PGRMC2/NCOR2/YAP1/CALCOCO1/CRY2/KANK2/ESR1/NR3C1/TRERF1/PGR/AR/FOXA1/EGLN2/SRARP/ESRRG/TP63	45
BP	GO:1905475	regulation of protein localization to membrane	55/3781	175/18723	0.000282562	0.00521263	0.00423243	APPL1/HECTD1/CNST/DLG1/PDPK1/KIF5B/RAB11FIP2/DAG1/C2CD5/CRKL/PRKCI/MAPK8/AP2B1/TCAF1/SSH1/EFCAB7/PTPN9/ADAM10/LZTFL1/ATP2C1/NMT1/ITGB1/LYPLA1/GOPC/RAB11A/SPTBN1/SLC5A3/ACSL3/PLS1/CLTC/PPFIA1/ZMYND8/ANK3/PRKCE/ATP2B4/PPP2R5A/PIK3R1/SORBS1/AKAP5/AR/KCNJ11/MTCL1/STOM/ITGA3/ZDHHC2/LRP1/EPHA3/GPC4/GZMB/PDZK1/AGR2/GPC3/LRRC15/ERBB2/SLC1A1	55
BP	GO:0007019	microtubule depolymerization	20/3781	46/18723	0.000285147	0.00522911	0.00424582	APC/CLASP2/TAOK1/KIF2A/CLASP1/CAMSAP1/TTBK2/SPAST/CKAP5/CAMSAP2/ATXN7/HDGFL3/KIF24/CKAP2/NCKAP5/MAP1A/MAP1B/STMND1/NAV3/BMERB1	20
BP	GO:0010828	positive regulation of glucose transmembrane transport	20/3781	46/18723	0.000285147	0.00522911	0.00424582	APPL1/PTPN11/ARPP19/C2CD5/PRKCI/MAPK14/BRAF/OCLN/OSBPL8/RNASEL/CREBL2/MEF2A/NFE2L2/ADIPOR2/IRS1/INSR/PIK3R1/SORBS1/SLC1A2/GPC3	20
BP	GO:0031122	cytoplasmic microtubule organization	23/3781	56/18723	0.000286273	0.00523422	0.00424996	SLK/HOOK1/KPNB1/DLG1/CLASP1/PAFAH1B1/CAMSAP1/CEP120/DYNC1H1/TUBGCP4/DCTN1/SLAIN2/CAMSAP2/CLIP1/PCM1/TUBGCP5/RAB11A/NUMA1/HOOK3/DST/CCDC88C/MAPT/CEP126	23
BP	GO:0038127	ERBB signaling pathway	41/3781	121/18723	0.000288722	0.00526343	0.00427368	PIK3C2A/ERBIN/PTPN11/SOCS4/PDPK1/CUL5/HIP1/FER/MAPK1/ADAM17/IQGAP1/PIK3CA/GAB1/SNX6/BRAF/ABL1/PTPN12/SOCS5/PSEN1/TSG101/CPNE3/CBL/SOS1/KIF16B/PTK2/RPS6KA5/DUSP3/NEU3/PTPN3/SHC1/GRB2/REPS2/CDH13/DGKD/BCAR3/AFAP1L2/GPRC5A/AGR2/AREG/NEURL1/EFEMP1	41
BP	GO:0016239	positive regulation of macroautophagy	25/3781	63/18723	0.000300555	0.00546302	0.00443574	SIRT1/SMCR8/SPTLC1/RAB3GAP2/WAC/BECN1/VPS13D/TSC1/LARP1/HTT/TBK1/FYCO1/RAB3GAP1/MAP3K7/PAFAH1B2/PIP4K2C/SCOC/PIP4K2B/SPTLC2/BNIP3L/CALCOCO2/ELAPOR1/PRKAA2/SESN3/HSPB8	25
BP	GO:0090092	regulation of transmembrane receptor protein serine/threonine kinase signaling pathway	75/3781	256/18723	0.000304189	0.00551286	0.00447621	CTDSPL2/RNF111/XIAP/SIRT1/LATS1/LEMD3/CREBBP/EP300/PDPK1/TRIM33/PPM1A/BMPR2/UBE2D3/SMAD4/ADAM17/SMAD2/SNX6/ACVR2B/ABL1/ACVR1B/BMPR1A/NOTCH2/MTMR4/BCL9L/SPRED2/STRAP/SNX25/SKIL/PARP1/ACVR1/TWSG1/NUMA1/NEO1/THBS1/SORL1/PBLD/NOMO3/LDLRAD4/SMAD3/CRIM1/ELAPOR2/PCSK6/SMURF2/HIPK2/SPART/SPRED1/IL17RD/NPNT/TGFBR1/SLC2A10/TOB1/HFE/FBN1/SULF1/INHBA/LRP2/ITGA3/WNT5A/CD109/CITED2/TGFB3/LRP1/TGFB2/DKK3/BMP8B/…	75
BP	GO:0045017	glycerolipid biosynthetic process	74/3781	252/18723	0.000307899	0.00556379	0.00451756	PIK3C2A/SMG1/PIK3C3/SOCS4/SACM1L/PIGN/PIKFYVE/MTMR1/IP6K1/FAR1/OCRL/FAM126B/PI4KA/SELENOI/MTMR6/PIK3CA/PIK3CB/PIGO/ETNK1/SYNJ1/EFR3A/CEPT1/MTM1/BPNT2/SLC44A1/SOCS6/SOCS5/PIGB/PIGK/LPCAT3/PIP5K1A/CDS1/PIGS/MTMR4/PIP4K2C/SYNJ2/CDS2/FITM2/PIGM/LPGAT1/PIGG/ACSL3/PIP4K2B/SOCS7/INPP4B/PI4K2B/PTEN/IMPA1/ATM/BPNT1/LCLAT1/IPMK/PIGV/LPIN2/INPP5F/PGAP1/AGPAT5/PIGW/GPAM/GPAT4/DGKH/DGKE/DGKD/PIK3R1/CHPT1/PIK3…	74
BP	GO:0009267	cellular response to starvation	50/3781	156/18723	0.000312033	0.00561642	0.00456029	PIK3R4/SIRT1/LARS1/PIK3C3/IMPACT/FNIP1/TNRC6A/MTOR/VPS41/USP33/BMPR2/EIF2AK4/BECN1/MAPK1/MAPK8/GCN1/ATG14/WRN/XPR1/CPEB4/MIOS/EIF2S1/SLC38A2/EIF2AK3/ZFYVE1/HSPA8/NFE2L2/FOXO3/RRAGB/EIF2AK2/STK24/RPTOR/LAMP2/KLF10/NUAK1/BCL2/PPM1D/GLUL/ELAPOR1/WIPI1/XBP1/PRKAA1/RNF152/PMAIP1/PRKAA2/HFE/STK26/SESN3/SREBF1/PDK4	50
BP	GO:0010171	body morphogenesis	19/3781	43/18723	0.000312629	0.00561642	0.00456029	NIPBL/CLASP2/PTPN11/EP300/CLASP1/DAG1/ZNF281/RAB3GAP1/ATP6AP2/SGPL1/FLVCR1/TIPARP/PHLDB1/PHLDB2/ARID5B/WNT3/TGFB3/GPC3/CRISPLD1	19
BP	GO:0000045	autophagosome assembly	35/3781	99/18723	0.000315028	0.0056431	0.00458196	TRAPPC8/SMCR8/UBXN2B/PIK3C3/ATG2B/RAB3GAP2/UBQLN1/TBC1D14/PIKFYVE/ATP2A2/UBQLN2/AMBRA1/BECN1/STX17/RAB33B/ATG14/ATG9A/TBC1D12/RB1CC1/RAB3GAP1/MTM1/STX12/PSEN1/IFT88/PIP4K2C/ULK2/RAB23/TMEM41B/PIP4K2B/SEC22B/ATG16L1/TP53INP1/ELAPOR1/WIPI1/SYNPO2	35
BP	GO:0098813	nuclear chromosome segregation	81/3781	281/18723	0.000316412	0.00565153	0.0045888	WAPL/CUL3/ATRX/STAG2/NIPBL/CTCF/TOP2B/PDS5A/CDC23/APC/HNRNPU/ERCC4/VPS4B/LATS1/PDS5B/INO80/SLF2/KPNB1/ANAPC1/FANCM/TPR/STAG1/CDC27/CENPC/SMC3/ABRAXAS1/MLH3/ABRAXAS2/TNKS/DYNC1H1/BECN1/CHAMP1/ESCO1/SLF1/SMC1A/SMC5/CTNNB1/SMC2/RMI1/CHMP2B/SLX4/NSL1/POGZ/MLH1/TERF1/MRE11/AGO4/PIBF1/MIS12/ACTR2/CDK5RAP2/NAA50/NDC1/MCMBP/ECT2/RAB11A/RB1/SMC4/NCAPD3/NUMA1/ZWILCH/ATM/CENPQ/KNTC1/BUB3/RAD21/NCAPG2/SGO2/C…	81
BP	GO:0006887	exocytosis	98/3781	352/18723	0.000318171	0.00566656	0.004601	REST/PIK3C2A/PREPL/TRAPPC11/CLASP2/SNX4/EXOC1/VPS4B/EXOC5/PDCD6IP/ARFGEF2/SCAMP1/PDPK1/VPS41/CLASP1/GSK3B/ARFGEF1/EXOC4/RAB11FIP2/EXOC6B/SEPTIN2/BLOC1S6/ATP2A2/AP1G1/EXOC7/FER/STXBP3/STX17/RAB33B/SNAP23/PPP3CB/EXOC8/ARL8B/EXOC6/SNX19/TMEM167A/RAB3GAP1/SYNJ1/ATP9A/FMR1/STAM/RAB21/DNM1L/RAB10/LIN7C/PSEN1/TSG101/RAP1B/CBL/RAB11FIP1/RAB2B/ITSN1/C12orf4/SNAP29/NSF/TMED10/SYTL4/RAB11A/RAB3D/PCLO/RAB27B…	98
BP	GO:0032210	regulation of telomere maintenance via telomerase	22/3781	53/18723	0.000322199	0.00570541	0.00463255	HNRNPU/POT1/TNKS2/XRCC5/ATR/DCP2/SMG6/TNKS/MAPK1/EXOSC10/CTNNB1/XRN1/NEK7/NAF1/TERF1/GNL3L/MAP3K4/CTC1/TENT4B/ATM/CCT2/PKIB	22
BP	GO:0032784	regulation of DNA-templated transcription, elongation	22/3781	53/18723	0.000322199	0.00570541	0.00463255	CCNT1/SCAF8/HNRNPU/ZMYND11/SUPT16H/ERCC6/CDC73/SETD5/EAF1/CCNT2/CDK13/CTNNB1/CCNK/TCERG1/ZNF326/KAT7/SUPT6H/RNF168/WDR43/LEO1/CDK12/DDX39B	22
BP	GO:0044773	mitotic DNA damage checkpoint signaling	30/3781	81/18723	0.000331511	0.00585354	0.00475282	GIGYF2/ATF2/RAD17/TAOK1/SDE2/XPC/ABRAXAS1/WAC/RINT1/TOPBP1/NBN/PRKDC/BRCC3/TAOK3/MRE11/MDC1/MSH2/MAP3K20/BRCA1/ATM/MDM2/RFWD3/NEK11/FOXN3/CCND1/FANCD2/CDKN1B/SOX4/DTL/PLK2	30
BP	GO:0003279	cardiac septum development	36/3781	103/18723	0.000336093	0.00591753	0.00480478	HECTD1/MAML1/TRIP11/ZBTB14/BMPR2/SMAD4/AP2B1/DCTN5/FRS2/BMPR1A/SUFU/NOTCH2/LUZP1/NSD2/NDST1/SAV1/PARVA/ACVR1/CNTRL/SEMA3C/MDM2/MDM4/TGFBR1/SOX4/HEG1/TBX3/GATA3/SLIT2/CHD7/LRP2/WNT5A/CITED2/TGFB2/SLIT3/FGFR2/TGFBR3	36
BP	GO:0031032	actomyosin structure organization	60/3781	196/18723	0.00033739	0.00592349	0.00480962	CUL3/CLASP2/CDC42BPB/ROCK1/PDCD6IP/TRPM7/ALMS1/MTOR/CLASP1/PRKAR1A/PAK2/SMAD4/EPB41/EPB41L5/TSC1/ABL1/MYH10/TMOD3/ITGB1/TJP1/AKAP13/TNFAIP1/MEF2A/TTC8/ECT2/ROCK2/CARMIL1/WASF2/NEBL/FRMD6/SIX4/PPFIA1/BAG4/PPP1R9A/SMAD3/FHDC1/CDC42BPA/EPB41L4A/EPB41L1/RACGAP1/TGFBR1/PHLDB2/MYO18A/ARRB1/PIK3R1/RHPN2/FERMT2/LPAR1/SORBS1/SDC4/FHOD3/ITGB5/CGNL1/EPB41L2/PDGFRB/TGFB3/EVL/LIMCH1/MYH14/MYH11	60
BP	GO:0035329	hippo signaling	18/3781	40/18723	0.000339727	0.00594763	0.00482922	LATS1/PJA2/TEAD1/DLG5/MAPK14/VGLL4/MOB1A/MOB1B/SAV1/STK4/WWC2/DCHS1/SHANK2/STK3/YAP1/AMOTL2/AMOT/AMOTL1	18
BP	GO:0032465	regulation of cytokinesis	33/3781	92/18723	0.000340831	0.00595011	0.00483123	PIK3R4/CUL3/SETD2/PRPF40A/PKN2/CCP110/BIRC6/PIK3C3/KIF3B/BECN1/SPAST/CHMP3/ZFYVE26/PKP4/AHCTF1/KLHL9/KIF13A/KIF20B/ECT2/RAB11A/BBS4/MAP9/PRKCE/RACGAP1/BRCA2/RAB11FIP4/SVIL/CDC14A/INCENP/RAB11FIP3/PLK4/E2F7/PLK2	33
BP	GO:0006289	nucleotide-excision repair	24/3781	60/18723	0.000342355	0.00595987	0.00483916	SLC30A9/RNF111/GTF2H3/POLK/SIRT1/ERCC4/ERCC6/USP7/FAN1/XPC/RAD23B/GTF2H1/SLX4/GTF2H2C/DDB1/RPA1/KAT7/CUL4A/USP45/LIG4/UVSSA/POLD3/BRCA2/BRIP1	24
BP	GO:0044843	cell cycle G1/S phase transition	71/3781	241/18723	0.000363278	0.00630634	0.00512048	GIGYF2/CUL3/TAF1/APPL1/USP37/DDX3X/APC/LATS1/INO80/CDC73/ANKRD17/SDE2/GSPT1/DLG1/CUL5/CUL4B/RBL2/KMT2E/PPP6C/EIF4E/WAC/PIAS1/CTDSP2/LSM11/ADAM17/CDK17/NPAT/APPL2/PHF8/PRKDC/CACUL1/PSME3/ECD/ITGB1/WEE1/ACVR1B/PPAT/CUL2/CUL4A/STXBP4/RB1/CTDSPL/ACVR1/RPTOR/PKD2/PTEN/ATM/ZNF655/MDM2/RFWD3/BACH1/BCL2/CDK14/RPS6KB1/RBBP8/KLF11/ATP2B4/PKD1/CCNE2/KANK2/CCND1/CDKN1B/RBL1/RDX/SOX4/PPP3CA/E2F7/INHBA/PLK2/TC…	71
BP	GO:0034620	cellular response to unfolded protein	34/3781	96/18723	0.000366819	0.00634997	0.0051559	ATF6/QRICH1/MBTPS2/EP300/RHBDD1/UFL1/BCL2L11/PPP1R15B/TMEM33/EIF2S1/ERLEC1/MBTPS1/TMBIM6/HSPA13/EIF2AK3/HSPA9/ABCB10/VAPB/HSPA8/NFE2L2/ERMP1/EIF2AK2/TM7SF3/TMTC4/PTPN1/AMFR/WFS1/CCND1/ERN1/PIK3R1/XBP1/AGR2/HSPB8/HSPA2	34
BP	GO:0033157	regulation of intracellular protein transport	68/3781	229/18723	0.000374337	0.00646201	0.00524688	CTDSPL2/PTPN11/ICE1/NUP58/UBR5/XPO1/GCC2/UHMK1/HUWE1/TPR/GSK3B/KIF5B/C2CD5/XPO4/UBE2D3/NPEPPS/RBM22/MAPK1/MAPK14/MAPK8/CEP290/TCAF1/TMEM30A/LMAN1/DNAJC27/TM9SF4/EFCAB7/EDEM1/NMT1/NUP54/PSEN1/SUFU/ERLEC1/IPO5/PCM1/KIF20B/NOLC1/GLI3/PDCD10/ECT2/RAB23/LEPROT/MAVS/BARD1/BAG4/SVIP/SORL1/BNIP3L/MDM2/SMAD3/TMEM30B/BCAS3/ANK3/PTPN1/PIK3R1/PRKAA1/AKAP5/MTCL1/PTPN14/CDH1/STOM/ZDHHC2/ABLIM3/SREBF1/GZMB/PDZK…	68
BP	GO:0009314	response to radiation	122/3781	456/18723	0.000380014	0.00654174	0.00531161	TAF1/CREB1/USP47/NIPBL/TP53BP1/NF1/MAP4K3/CLOCK/RO60/POLK/SIRT1/ERCC4/DHX36/TRIM32/ERCC6/PRIMPOL/INO80/CREBBP/IMPACT/SDE2/SLC24A1/XRCC5/EP300/PAXIP1/MTOR/CUL4B/XPC/ATR/ABRAXAS1/REV1/PIAS1/EIF2AK4/RHBDD1/TENT2/ZBTB1/HMGCR/ZMPSTE24/INIP/MAPK14/MAPK8/TOPBP1/FBXL17/SMC1A/FECH/EYA3/RRM1/CRY1/PRKDC/PPID/RAD1/LZIC/UBE4B/FMR1/BRCC3/WRN/NMT1/ITGB1/MECP2/NUCKS1/KRAS/DDB1/MSH6/CDS1/EIF2S1/SPRTN/CBL/NEDD4/FB…	122
BP	GO:0032956	regulation of actin cytoskeleton organization	99/3781	358/18723	0.000385105	0.00661098	0.00536783	CLASP2/GMFB/WASL/LATS1/ROCK1/TWF1/AP1AR/TAOK1/ALMS1/RICTOR/DLG1/MTOR/CLASP1/ARFGEF1/NCKAP1/CAPZA2/RASA1/ABI2/ARFIP1/ARHGAP35/MTPN/PAK2/CD2AP/FER/SMAD4/IQGAP1/TSC1/SSH1/PIK3CA/ABL1/ADD1/CYFIP1/EPS8/TMOD3/JMY/WASHC5/SPTAN1/FMN1/SPIRE1/TJP1/ABL2/CRK/NOTCH2/ACTR2/DIXDC1/AKAP13/LIMA1/TTC8/ECT2/RHOBTB1/ROCK2/SPTBN1/SNX9/CARMIL1/WASF2/SSH2/PPFIA1/CELSR1/BAG4/PPP1R9A/SMAD3/SWAP70/JAM3/BCAS3/GRB2/PRKCE/CR…	99
BP	GO:0032386	regulation of intracellular transport	94/3781	337/18723	0.000388609	0.00665264	0.00540166	DHX9/SEC24B/SETD2/CTDSPL2/CPSF6/PTPN11/ICE1/NUP58/UBR5/XPO1/GCC2/UHMK1/HUWE1/DNAJC13/TPR/USP7/GSK3B/KIF5B/RHOT1/PPP1R12A/C2CD5/XPO4/ARFIP1/DYNC1H1/UBE2D3/NUP153/RINT1/NPEPPS/RBM22/MAPK1/MAPK14/MAPK8/CEP290/CHMP3/TCAF1/TMEM30A/LMAN1/DNAJC27/TM9SF4/TTC21B/EFCAB7/YIPF5/ATP9A/EDEM1/NMT1/RAB21/NUP54/PSEN1/SUFU/ERLEC1/NEDD4/SUPT6H/IPO5/PCM1/KIF20B/NOLC1/GLI3/PDCD10/ECT2/RNF139/RAB23/LEPROT/MAVS/NUMA1/B…	94
BP	GO:0043550	regulation of lipid kinase activity	27/3781	71/18723	0.000396599	0.00677068	0.0054975	PIK3R4/SOCS4/RBL2/RUBCN/AMBRA1/ATG14/SOCS6/SOCS5/PIP4K2C/PTK2/RB1/PIP4K2B/SOCS7/VAV2/IRS1/VAV3/PPP2R5A/RBL1/PIK3R1/PIK3R3/SOCS1/PDGFRB/TEK/FGFR3/FLT3/EEF1A2/CCL19	27
BP	GO:0000724	double-strand break repair via homologous recombination	45/3781	138/18723	0.000398383	0.0067824	0.00550701	NIPBL/SETD2/TP53BP1/ARID2/WDR48/RIF1/ERCC4/ERCC6/INO80/PPP4R2/PALB2/FANCM/FAN1/RECQL/EXD2/SHLD2/NBN/SMC5/ZFYVE26/RMI1/MCM9/SLX4/WRN/SMCHD1/LIG3/NUCKS1/RPA1/MRE11/ACTR2/REV3L/KLHL15/SPIDR/PARP1/BRCA1/FIGNL1/HELB/RFWD3/UBQLN4/TIMELESS/RAD21/RBBP8/MCM2/BRCA2/GINS4/MCM4	45
BP	GO:0045995	regulation of embryonic development	25/3781	64/18723	0.000399581	0.0067841	0.0055084	NIPBL/CLASP2/TRIP12/DHX36/RAB14/NR2C2/CLASP1/PAFAH1B1/DAG1/CTNNB1/SEPTIN7/TDG/UTP25/NFE2L2/ZBED3/INSR/RPS6KA6/PHLDB1/RACGAP1/NOCT/PHLDB2/LAMA3/AMOT/LAMA2/LAMA5	25
BP	GO:0031114	regulation of microtubule depolymerization	15/3781	31/18723	0.000402955	0.00682263	0.00553969	APC/CLASP2/TAOK1/CLASP1/CAMSAP1/TTBK2/SPAST/CAMSAP2/ATXN7/HDGFL3/CKAP2/MAP1A/MAP1B/NAV3/BMERB1	15
BP	GO:0007064	mitotic sister chromatid cohesion	14/3781	28/18723	0.000409812	0.0068664	0.00557522	ATRX/NIPBL/PDS5A/PDS5B/SLF2/SMC3/TNKS/SLF1/SMC1A/SMC5/POGZ/NAA50/RB1/RAD21	14
BP	GO:0006999	nuclear pore organization	9/3781	14/18723	0.000409984	0.0068664	0.00557522	NUP98/NUP133/TPR/NUP153/AHCTF1/NUP54/NUP205/NDC1/NUP107	9
BP	GO:0010839	negative regulation of keratinocyte proliferation	9/3781	14/18723	0.000409984	0.0068664	0.00557522	INTU/CASK/MED1/KLF9/PTPRK/CD109/EPPK1/FGFR2/SLURP1	9
BP	GO:0031054	pre-miRNA processing	9/3781	14/18723	0.000409984	0.0068664	0.00557522	PRKRA/DROSHA/AGO1/DICER1/ADAR/TUT7/AGO4/AGO3/AGO2	9
BP	GO:0007059	chromosome segregation	96/3781	346/18723	0.00041354	0.00690724	0.00560838	WAPL/SMARCAD1/CUL3/PUM1/ATRX/PUM2/STAG2/NIPBL/CTCF/TOP2B/PDS5A/CDC23/DDX3X/APC/HNRNPU/ERCC4/VPS4B/LATS1/PDS5B/INO80/SLF2/KPNB1/ANAPC1/FANCM/TPR/TOP1/STAG1/CDC27/TLK1/CENPC/SMC3/ABRAXAS1/MLH3/ABRAXAS2/TNKS/DYNC1H1/BECN1/CHAMP1/USP9X/ESCO1/SLF1/SMC1A/SMC5/ARL8B/CTNNB1/SMC2/RMI1/CHMP2B/SLX4/NSL1/POGZ/MLH1/TERF1/MRE11/AGO4/PIBF1/MIS12/RAD18/ACTR2/CDK5RAP2/NAA50/NDE1/NDC1/MCMBP/CEP85/ECT2/RAB11A/RB1/S…	96
BP	GO:0061458	reproductive system development	115/3781	427/18723	0.000420333	0.00700177	0.00568514	ATRX/NIPBL/SETD2/HECTD1/ASH1L/WDR48/SP3/SIRT1/PTPN11/UBE3A/BIRC6/KDM5A/BPTF/FEM1B/DLG1/ARID4A/SMARCC1/TMF1/GGNBP2/BMPR2/CRKL/FBXW8/ARNT/NCOA4/NRIP1/PLEKHA5/MAPK1/SMAD4/MAPK14/KDM5B/ZFX/WDR19/GRHL2/BCL2L11/RNF38/CTNNA1/RRM1/CTNNB1/FNDC3A/FRS2/AGO4/ZNF568/NOTCH2/NCOA1/CBL/PRDX3/CSDE1/BIRC2/MAP3K4/PTK2/HSD17B4/GLI3/SGPL1/MSH2/FOXO3/NUP107/STK4/BCL2L2/SIX4/PKD2/PTEN/MED1/HMGCS1/BCL2/STK3/TIPARP/GRB2/…	115
BP	GO:0072698	protein localization to microtubule cytoskeleton	22/3781	54/18723	0.000440988	0.00732609	0.00594847	APC/HNRNPU/NEDD1/UBXN2B/CEP350/GOLGB1/GSK3B/KIAA0753/CEP192/CHAMP1/TTBK2/PIBF1/C2CD3/MID2/PCM1/KIF20B/BBS4/ABHD17B/NUMA1/HOOK3/MAP1A/STIL	22
BP	GO:0008088	axo-dendritic transport	28/3781	75/18723	0.000444214	0.0073599	0.00597593	FBXW11/HNRNPU/SPG11/KIF3B/AP3B1/AP3M1/KIF3A/OPA1/PAFAH1B1/KIF5B/BLOC1S6/DYNC1H1/SPAST/ARL8B/RAB21/PURA/TRAK1/KIF1B/HSPA8/TRAK2/ARMCX3/RAB27B/AP3M2/DST/MAP1A/KIF5C/MAPT/SYBU	28
BP	GO:0048863	stem cell differentiation	62/3781	206/18723	0.000448552	0.0074119	0.00601815	PUM1/REST/SETD2/HNRNPU/ITCH/DHX36/KLHL12/XRCC5/CDK13/KDM3A/NUDT21/UFL1/MAPK1/SMAD4/ZNF281/PHACTR4/FBXL17/CHD2/CTNNB1/FAM172A/ABL1/PRKDC/BMPR1A/STAT3/LRP6/MSI2/HSPA9/NOLC1/NFE2L2/EIF2AK2/CDK12/ACVR1/TAPT1/SEMA4F/SEMA3C/N4BP2L2/JARID2/KITLG/YAP1/PUS7/SEMA5A/ERBB4/EDNRA/ESR1/MLLT3/SEMA3F/SEMA4B/FOXA1/LAMA5/WNT3/ZFP36L2/SEMA6D/FN1/CITED2/RET/TGFB2/RBM24/FGFR2/GREM1/SEMA3E/TP63/SEMA3B	62
BP	GO:0000819	sister chromatid segregation	61/3781	202/18723	0.000450631	0.00742197	0.00602632	WAPL/CUL3/ATRX/STAG2/NIPBL/CTCF/TOP2B/PDS5A/CDC23/APC/HNRNPU/VPS4B/LATS1/PDS5B/INO80/SLF2/KPNB1/ANAPC1/TPR/STAG1/CDC27/CENPC/SMC3/TNKS/BECN1/CHAMP1/ESCO1/SLF1/SMC1A/SMC5/CTNNB1/SMC2/CHMP2B/NSL1/POGZ/MRE11/PIBF1/MIS12/CDK5RAP2/NAA50/MCMBP/RAB11A/RB1/SMC4/NCAPD3/NUMA1/ZWILCH/ATM/KNTC1/BUB3/RAD21/NCAPG2/SGO2/RACGAP1/INCENP/AXIN2/ESCO2/TOP2A/BUB1B/CENPE/CENPF	61
BP	GO:1903362	regulation of cellular protein catabolic process	74/3781	255/18723	0.000452012	0.00742197	0.00602632	TAF1/CSNK1A1/HECTD1/UBE3A/ZYG11B/SOCS4/LATS1/MARCHF7/XPO1/ANKIB1/UBQLN1/TMTC3/USP7/UBE2K/GSK3B/SMARCC1/RYBP/TMF1/ARIH1/UBQLN2/RCHY1/WAC/PIAS1/FBXW8/RAD23B/UFL1/BAG5/VGLL4/FBXL5/RNF14/PSME3/FMR1/USP19/RGP1/SOCS5/PSEN1/SUFU/OPHN1/RIC1/BTRC/RNF40/BBS7/MAPK9/STYX/PTK2/NFE2L2/USP14/RNF139/PSMC1/VPS35/OGT/USP13/TLK2/PTEN/SVIP/USP25/MDM2/GCLC/RNF19A/ALAD/MYLIP/UBQLN4/HSP90AA1/PKD1/HIPK2/ABCA2/MAP1A/RDX/…	74
BP	GO:0019079	viral genome replication	43/3781	131/18723	0.000452764	0.00742197	0.00602632	TASOR/TOP2B/DDX3X/PKN2/YTHDC2/SRPK2/KPNA6/PDE12/SETDB1/EEA1/EIF2AK4/PI4KA/LARP1/HACD3/PPID/ZC3HAV1/CCNK/FMR1/ADAR/NUCKS1/MPHOSPH8/DDB1/STAU1/RNASEL/VAPB/HSPA8/ROCK2/EIF2AK2/RESF1/MAVS/CNOT7/FBXL2/ATG16L1/BCL2/CTBP2/FAM111A/DEK/TOP2A/STOM/OAS3/SLPI/CCL5/ISG15	43
BP	GO:0009755	hormone-mediated signaling pathway	58/3781	190/18723	0.000454002	0.00742257	0.00602681	APPL1/ARID1A/CLOCK/SIRT1/PTPN11/UBE3A/UBR5/LATS1/EP300/STRN3/KMT2D/TMF1/NCOR1/CNOT1/KDM3A/UFL1/NCOA4/GTF2H1/PRLR/DDX17/APPL2/CRY1/RNF14/NR1D2/RBFOX2/ZMIZ1/UFSP2/RNF6/ABHD2/NCOA1/NEDD4/PTGES3/ARNTL/PARP1/BRCA1/ADIPOR2/MED1/PGRMC2/NCOR2/YAP1/CALCOCO1/CRY2/THRB/KANK2/ESR1/NR3C1/TRERF1/PGR/AR/LGR4/FOXA1/EGLN2/GHR/RARA/SRARP/ESRRG/TP63/SSTR2	58
BP	GO:0043954	cellular component maintenance	24/3781	61/18723	0.000457456	0.00745931	0.00605664	DLG1/ERC1/LNPK/DCTN1/PLEKHA7/TJP1/OPHN1/TANC1/PCLO/VPS35/ABHD17B/SYNGAP1/IGF1R/ZMYND8/CTBP2/INSR/HOMER1/F2R/CHCHD10/FERMT2/MTSS1/ITGA3/APOE/CBLN2	24
BP	GO:0048608	reproductive structure development	114/3781	424/18723	0.0004754	0.00773151	0.00627766	ATRX/NIPBL/SETD2/HECTD1/ASH1L/WDR48/SP3/SIRT1/PTPN11/UBE3A/BIRC6/KDM5A/BPTF/FEM1B/DLG1/ARID4A/SMARCC1/TMF1/GGNBP2/BMPR2/CRKL/FBXW8/ARNT/NCOA4/NRIP1/MAPK1/SMAD4/MAPK14/KDM5B/ZFX/WDR19/GRHL2/BCL2L11/RNF38/CTNNA1/RRM1/CTNNB1/FNDC3A/FRS2/AGO4/ZNF568/NOTCH2/NCOA1/CBL/PRDX3/CSDE1/BIRC2/MAP3K4/PTK2/HSD17B4/GLI3/SGPL1/MSH2/FOXO3/NUP107/STK4/BCL2L2/SIX4/PKD2/PTEN/MED1/HMGCS1/BCL2/STK3/TIPARP/GRB2/PATZ1/KI…	114
BP	GO:0007052	mitotic spindle organization	40/3781	120/18723	0.000496444	0.00805256	0.00653834	STAG2/CLASP2/CEP97/HNRNPU/TOGARAM1/VPS4B/KIF3B/KPNB1/TPR/KIF2A/STAG1/CLASP1/SMC3/ABRAXAS1/ABRAXAS2/TNKS/DYNC1H1/CEP192/SPAST/DCTN1/SMC1A/CKAP5/CHMP2B/MECP2/PIBF1/RAB11A/MAP9/NUMA1/CLTC/EFHC1/PKD1/RACGAP1/EML1/STIL/TACC1/KIF11/CEP126/PLK2/CENPE/MISP	40
BP	GO:0030330	DNA damage response, signal transduction by p53 class mediator	27/3781	72/18723	0.000513852	0.0082914	0.00673226	ATRX/SIRT1/MARCHF7/MYO6/PAXIP1/ATR/ACER2/DYRK1A/ZMPSTE24/NBN/USP10/SPRED2/FOXO3/ATM/MDM2/MDM4/PPM1D/RPS6KA6/HIPK2/SPRED1/PLA2R1/BRCA2/CDKN1B/SOX4/E2F7/PMAIP1/PLK2	27
BP	GO:0071479	cellular response to ionizing radiation	27/3781	72/18723	0.000513852	0.0082914	0.00673226	NIPBL/TP53BP1/CLOCK/SIRT1/INO80/XRCC5/ATR/ZMPSTE24/MAPK14/RAD1/WRN/NUCKS1/LIG4/ECT2/INTS7/SPIDR/MAP3K20/TLK2/FIGNL1/ATM/MDM2/GRB2/YAP1/GATA3/NET1/CYBA/RHOB	27
BP	GO:0031445	regulation of heterochromatin assembly	10/3781	17/18723	0.000531862	0.00847141	0.00687842	TASOR/TPR/ZNF304/ATF7IP/SETDB1/PHF2/PHF8/MPHOSPH8/RESF1/DNMT1	10
BP	GO:0035518	histone H2A monoubiquitination	10/3781	17/18723	0.000531862	0.00847141	0.00687842	CUL4B/RYBP/BCOR/TRIM37/DDB1/RNF168/RNF2/SKP1/PCGF5/BMI1	10
BP	GO:0046855	inositol phosphate dephosphorylation	10/3781	17/18723	0.000531862	0.00847141	0.00687842	OCRL/SYNJ1/BPNT2/SYNJ2/INPP5B/INPP4B/PTEN/IMPA1/BPNT1/INPP5J	10
BP	GO:0120261	regulation of heterochromatin organization	10/3781	17/18723	0.000531862	0.00847141	0.00687842	TASOR/TPR/ZNF304/ATF7IP/SETDB1/PHF2/PHF8/MPHOSPH8/RESF1/DNMT1	10
BP	GO:1900363	regulation of mRNA polyadenylation	10/3781	17/18723	0.000531862	0.00847141	0.00687842	CCNT1/YTHDC1/CTR9/CPSF6/ZC3H14/RNF20/NUDT21/VIRMA/RNF40/CPEB3	10
BP	GO:0006898	receptor-mediated endocytosis	71/3781	244/18723	0.000535528	0.00850787	0.00690803	HNRNPK/WASL/TBC1D5/MKLN1/USP46/DNAJC13/SCYL2/AP4E1/PIKFYVE/ATXN2/HIP1/FNBP1L/GPR107/UBQLN2/M6PR/AP1G1/CD2AP/FCHO2/AP2B1/PIK3CB/SYNJ1/FMR1/RAB21/EPS15/ITGB1/CANX/ATAD1/SCARB2/LMBRD1/SMAP1/ITSN2/OPHN1/CBL/LRP6/NEDD4/ITSN1/BTBD8/ITGAV/IGF2R/SNX9/NEU3/SNX1/CLTC/BMP2K/SORL1/AHI1/INPP5F/GRB2/INSR/HSPG2/PPT1/TFRC/PLA2R1/GRK3/LDLRAD3/ABCA2/DGKD/ARRB1/RAB31/CALCRL/HFE/DNAJC6/LRP2/LDLR/APOC1/LRP1/APOE/GREM…	71
BP	GO:0034249	negative regulation of cellular amide metabolic process	78/3781	273/18723	0.000540439	0.00856388	0.0069535	GIGYF2/PUM1/DCP1A/METTL14/IREB2/DDX3X/HNRNPR/CNOT6/CELF1/CAPRIN1/ROCK1/DHX36/YTHDF3/TPR/TNRC6A/PDE12/DCP2/CNOT6L/RC3H2/EIF4E/EIF2AK4/CNOT1/DIS3/DDX6/TSC1/LARP1/PAN2/AGO1/PAIP2/CNOT8/PAN3/METTL16/XRN1/FMR1/FXR1/MLH1/RC3H1/PURA/TUT7/CPEB4/AGO4/AGO3/STAT3/EIF2S1/EIF2AK3/EIF4EBP2/SYNCRIP/TNRC6B/ROCK2/RNF139/CPEB3/EIF2AK2/CPEB2/FTO/TENT4B/EPRS1/CNOT7/TNRC6C/SRP9/PATL1/SORL1/DHFR/PUS7/NOCT/PAIP2B/ENC1/…	78
BP	GO:0000725	recombinational repair	45/3781	140/18723	0.000565623	0.00894002	0.00725891	NIPBL/SETD2/TP53BP1/ARID2/WDR48/RIF1/ERCC4/ERCC6/INO80/PPP4R2/PALB2/FANCM/FAN1/RECQL/EXD2/SHLD2/NBN/SMC5/ZFYVE26/RMI1/MCM9/SLX4/WRN/SMCHD1/LIG3/NUCKS1/RPA1/MRE11/ACTR2/REV3L/KLHL15/SPIDR/PARP1/BRCA1/FIGNL1/HELB/RFWD3/UBQLN4/TIMELESS/RAD21/RBBP8/MCM2/BRCA2/GINS4/MCM4	45
BP	GO:0031056	regulation of histone modification	48/3781	152/18723	0.000590992	0.00931717	0.00756514	ATRX/SIN3A/NIPBL/CTCF/PARG/CTR9/RIF1/SIRT1/RNF20/TRIP12/UBR5/KDM5A/NSD1/PAXIP1/SETD5/ZNF304/KMT2E/RTF1/C6orf89/GLYR1/KDM3A/SMAD4/ZMPSTE24/MAPK8/BCOR/CTNNB1/KMT2A/SETD7/FMR1/MECP2/KAT7/RNF40/SUPT6H/PAXBP1/RPS6KA5/TADA2B/OTUB2/OGT/NSD3/BRCA1/JARID2/DNMT1/NCAPG2/MYB/AASS/ARRB1/GATA3/SREBF1	48
BP	GO:0071383	cellular response to steroid hormone stimulus	61/3781	204/18723	0.000597133	0.00939004	0.00762431	REST/USP8/ARID1A/CLOCK/SIRT1/HNRNPU/UBE3A/UBR5/LATS1/EP300/STRN3/KMT2D/TMF1/EIF4E/NCOR1/CNOT1/KDM3A/UFL1/NCOA4/BCL2L11/FECH/DDX17/ATP2B1/CRY1/RNF14/RBFOX2/ZMIZ1/UFSP2/RNF6/ABHD2/NEDD4/PTGES3/ARNTL/ATP1A1/FOXO3/PARP1/BRCA1/MED1/PGRMC2/NPC1/NCOR2/YAP1/CALCOCO1/CRY2/KANK2/ESR1/NR3C1/BMI1/TRERF1/PGR/KLF9/AR/FOXA1/ZFP36L2/EGLN2/STC1/SRARP/ESRRG/FLT3/TP63/SSTR2	61
BP	GO:0009895	negative regulation of catabolic process	89/3781	320/18723	0.000604024	0.00946598	0.00768597	DHX9/TAF1/THRAP3/SMG1/PHAX/HNRNPU/SMCR8/ROCK1/MARCHF7/DHX36/EIF4G2/TBC1D14/USP7/NBAS/TAB3/MTOR/SMARCC1/RYBP/USP30/RUBCN/WAC/LRPPRC/NCOR1/TENT2/BECN1/ZKSCAN3/HMGCR/MAPK14/ANGEL2/HERC1/BAG5/TSC1/PIK3CA/LARP1/METTL16/PAIP1/MTM1/FMR1/SECISBP2/USP19/NAF1/LRIG2/RGP1/PSEN1/SUFU/STAT3/OPHN1/MTMR9/RIC1/ETFBKMT/NMNAT1/AZIN1/STYX/SYNCRIP/TAB2/TIRAP/WDR6/USP14/TENT4B/OGT/MYCBP2/TLK2/PTPN3/SEC22B/CYP51A1/SVIP…	89
BP	GO:1903078	positive regulation of protein localization to plasma membrane	24/3781	62/18723	0.000605026	0.00946598	0.00768597	CNST/DLG1/PDPK1/KIF5B/RAB11FIP2/PRKCI/PTPN9/ATP2C1/ITGB1/RAB11A/SPTBN1/ACSL3/PLS1/PRKCE/ATP2B4/PIK3R1/SORBS1/AKAP5/KCNJ11/ITGA3/ZDHHC2/LRP1/EPHA3/AGR2	24
BP	GO:0007097	nuclear migration	11/3781	20/18723	0.000610185	0.00952258	0.00773193	FBXW11/PAFAH1B1/CEP120/DYNC1H1/DCTN1/DOCK7/PCM1/SYNE2/HOOK3/CLMN/SLC9A3R1	11
BP	GO:0002328	pro-B cell differentiation	8/3781	12/18723	0.000619998	0.00957897	0.00777771	FNIP1/SOS2/NUDT21/PRKDC/SOS1/LIG4/SOX4/FLT3	8
BP	GO:0031453	positive regulation of heterochromatin assembly	8/3781	12/18723	0.000619998	0.00957897	0.00777771	TASOR/TPR/ZNF304/ATF7IP/SETDB1/MPHOSPH8/RESF1/DNMT1	8
BP	GO:0033523	histone H2B ubiquitination	8/3781	12/18723	0.000619998	0.00957897	0.00777771	CTR9/RNF20/CDC73/WAC/UBE2E1/RNF40/LEO1/DTX3L	8
BP	GO:0120263	positive regulation of heterochromatin organization	8/3781	12/18723	0.000619998	0.00957897	0.00777771	TASOR/TPR/ZNF304/ATF7IP/SETDB1/MPHOSPH8/RESF1/DNMT1	8
BP	GO:0046822	regulation of nucleocytoplasmic transport	36/3781	106/18723	0.00062526	0.00963618	0.00782416	DHX9/SETD2/CTDSPL2/CPSF6/PTPN11/NUP58/UBR5/XPO1/UHMK1/TPR/GSK3B/PPP1R12A/XPO4/NUP153/RBM22/MAPK1/MAPK14/DNAJC27/EFCAB7/NUP54/PSEN1/SUFU/NEDD4/SUPT6H/IPO5/NOLC1/GLI3/ECT2/RAB23/MAVS/BARD1/MDM2/SMAD3/PIK3R1/PTPN14/CDH1	36
BP	GO:0061387	regulation of extent of cell growth	37/3781	110/18723	0.000652119	0.0100251	0.00813996	SIN3A/ADNP/DIP2B/EIF4G2/GSK3B/PAFAH1B1/BMPR2/GOLGA4/MACF1/ABL1/CYFIP1/RAB21/RYK/RNF6/SHTN1/ULK2/RAB11A/SEMA4F/CDKL5/SEMA3C/SEMA5A/SPART/SEMA3F/MAPT/SEMA4B/PTPRS/WNT3/MAP1B/SEMA6D/WNT5A/FN1/LRP1/NRCAM/APOE/OLFM1/SEMA3E/SEMA3B	37
BP	GO:0010810	regulation of cell-substrate adhesion	65/3781	221/18723	0.000658317	0.0100778	0.00818275	NF1/CLASP2/PTPN11/ROCK1/SLK/AP1AR/CLASP1/GSK3B/DAG1/RASA1/CRKL/ACER2/RREB1/EPB41L5/MACF1/IQGAP1/TSC1/PTPRA/PIK3CB/ABL1/FMN1/CRK/PTK2/DOCK1/ROCK2/DUSP3/CARMIL1/STK4/CASK/UTRN/VCL/PEAK1/PTEN/THBS1/SMAD3/BCL2/BCAS3/RIN2/PRKCE/DDR1/PREX1/CDH13/NID1/NPNT/MYADM/PHLDB2/PIK3R1/FERMT2/SDC4/EMP2/POSTN/ITGA3/FN1/EDIL3/TEK/SPOCK1/LRP1/LIMCH1/EPHA3/ECM2/COL8A1/ITGA6/GREM1/AGR2/SEMA3E	65
BP	GO:0032456	endocytic recycling	27/3781	73/18723	0.000660439	0.0100778	0.00818275	SNX4/KIAA1109/EPG5/VPS52/RAB14/ACAP2/LMTK2/VPS50/VPS39/ATP9A/ANKRD50/SNX27/EPS15/VPS26A/CCDC93/RAB11A/CMTM6/VPS35/VPS35L/SORL1/INPP5F/RAB11FIP4/RAB11FIP3/GRIP1/AKAP5/DENND1B/ZDHHC2	27
BP	GO:0051865	protein autoubiquitination	27/3781	73/18723	0.000660439	0.0100778	0.00818275	CUL3/TAF1/HECTD1/LTN1/RNF41/UBE3A/ITCH/MARCHF7/TRAF6/CNOT4/MARCHF5/UBE2D3/RNF141/RNF4/NFX1/SH3RF1/TRIM37/RAD18/RNF13/RNF11/KLHL24/BRCA1/MDM2/DTX3L/RNF213/AMFR/SASH1	27
BP	GO:0048284	organelle fusion	45/3781	141/18723	0.000670644	0.0102083	0.00828872	TGFBRAP1/ANKFY1/SPG11/GOSR1/VPS8/HUWE1/OPA1/PIKFYVE/VPS41/KIF5B/MIGA1/C2CD5/USP30/EEA1/MFN1/VPS39/STX17/SNAP23/CHMP3/ARL8B/CHMP2B/YIPF5/USO1/DNM1L/STX12/OMA1/VCPIP1/AFG3L2/VAMP4/SNAP29/PIP4K2B/SEPTIN8/SEC22B/VAV3/CPLANE2/RAB8B/TFRC/STXBP1/TBC1D4/GDAP1/SYT7/SAMD9/SYT9/SYT1/SYT13	45
BP	GO:0045936	negative regulation of phosphate metabolic process	117/3781	441/18723	0.000694117	0.0105397	0.00855775	NF1/IPO7/APC/BOD1L1/IBTK/SUZ12/SIRT1/HNRNPU/SMCR8/SOCS4/LATS1/ROCK1/PRKAR2A/IMPACT/WNK1/PDPK1/MTOR/TRAF3IP1/GSK3B/ARPP19/GGNBP2/RUBCN/CRKL/NCOR1/PRKAR1A/PAK2/CTDSP2/HIPK3/HMGCR/ATG14/PPP1R15B/AIDA/SNX6/PIK3CB/ABL1/ZNF675/PRKDC/ADAR/PPP2R5D/GSKIP/SOCS5/PSEN1/TSG101/PIBF1/OCLN/STAT3/CBL/PRDX3/LRP6/SPAG9/PIP4K2C/YWHAB/IPO5/YWHAG/DNAJC10/CEP85/ZBED3/MGAT5/PTPN13/SPRED2/INCA1/RB1/ROCK2/NNT/GNAQ/DUSP3/…	117
BP	GO:1903320	regulation of protein modification by small protein conjugation or removal	70/3781	242/18723	0.000698944	0.0105687	0.00858135	CUL3/TAF1/RNF111/CTR9/DDX3X/HMG20A/XIAP/WDR48/RNF20/UBE3A/ITCH/TRIP12/UBR5/MARCHF7/TRIM44/UBQLN1/HUWE1/SENP2/FANCM/PAXIP1/MTOR/TOPORS/TRAF6/OTUD4/SPOPL/RCHY1/PIAS1/DCUN1D1/ARNT/UFL1/DCUN1D4/BAG5/PRMT3/CTNNB1/CRY1/ABL1/ZMIZ1/PSEN1/PIAS3/SPRTN/NDFIP1/BTRC/RNF40/GNL3L/PER2/BIRC2/MAPK9/NDFIP2/UBA2/SKP1/OTUB2/OGT/BRCA1/MYCBP2/PTEN/GCLC/HSP90AA1/DTX3L/PRKCE/FANCI/WFS1/BMI1/SASH1/TGFBR1/ARRDC3/SIAH2/ARR…	70
BP	GO:0006413	translational initiation	39/3781	118/18723	0.000699451	0.0105687	0.00858135	DDX3X/UHMK1/EIF4G2/YTHDF3/IMPACT/DHX29/TPR/MTOR/EIF4G3/EIF4E/EIF3A/EIF2AK4/NCBP1/PPP1R15B/DENR/LARP1/EIF4B/DHX33/PAIP2/EIF5/PAIP1/FMR1/GLE1/EIF1AX/EIF2S1/ABCE1/EIF2AK3/EIF4EBP2/CSDE1/EIF3L/EIF4A2/EIF3C/EIF2AK2/DNAJC3/RPS6KB1/EIF4E3/PAIP2B/AGO2/CCL5	39
BP	GO:1905037	autophagosome organization	35/3781	103/18723	0.000730221	0.0110067	0.008937	TRAPPC8/SMCR8/UBXN2B/PIK3C3/ATG2B/RAB3GAP2/UBQLN1/TBC1D14/PIKFYVE/ATP2A2/UBQLN2/AMBRA1/BECN1/STX17/RAB33B/ATG14/ATG9A/TBC1D12/RB1CC1/RAB3GAP1/MTM1/STX12/PSEN1/IFT88/PIP4K2C/ULK2/RAB23/TMEM41B/PIP4K2B/SEC22B/ATG16L1/TP53INP1/ELAPOR1/WIPI1/SYNPO2	35
BP	GO:0010563	negative regulation of phosphorus metabolic process	117/3781	442/18723	0.000759472	0.0114198	0.00927239	NF1/IPO7/APC/BOD1L1/IBTK/SUZ12/SIRT1/HNRNPU/SMCR8/SOCS4/LATS1/ROCK1/PRKAR2A/IMPACT/WNK1/PDPK1/MTOR/TRAF3IP1/GSK3B/ARPP19/GGNBP2/RUBCN/CRKL/NCOR1/PRKAR1A/PAK2/CTDSP2/HIPK3/HMGCR/ATG14/PPP1R15B/AIDA/SNX6/PIK3CB/ABL1/ZNF675/PRKDC/ADAR/PPP2R5D/GSKIP/SOCS5/PSEN1/TSG101/PIBF1/OCLN/STAT3/CBL/PRDX3/LRP6/SPAG9/PIP4K2C/YWHAB/IPO5/YWHAG/DNAJC10/CEP85/ZBED3/MGAT5/PTPN13/SPRED2/INCA1/RB1/ROCK2/NNT/GNAQ/DUSP3/…	117
BP	GO:0046605	regulation of centrosome cycle	20/3781	49/18723	0.000769486	0.0115423	0.00937184	SIRT1/VPS4B/XPO1/PDCD6IP/ALMS1/CEP120/TMEM67/CEP295/CHMP3/CHMP2B/MDM1/TRIM37/CEP76/CDK5RAP2/ROCK2/BRCA1/RAB6C/PLK4/STIL/PLK2	20
BP	GO:0016233	telomere capping	17/3781	39/18723	0.000774789	0.0115657	0.00939085	ERCC4/POT1/TNKS2/USP7/SMG6/TNKS/DCLRE1A/MAPK1/NBN/PRKDC/NEK7/TFIP11/MRE11/MAP3K4/CTC1/ATM/PKIB	17
BP	GO:0031507	heterochromatin assembly	17/3781	39/18723	0.000774789	0.0115657	0.00939085	TASOR/SMARCA5/SIRT1/BAZ2A/TPR/ZNF304/ATF7IP/SETDB1/PHF2/FAM172A/PHF8/SMCHD1/MPHOSPH8/RESF1/EZH1/ZNFX1/DNMT1	17
BP	GO:0051653	spindle localization	22/3781	56/18723	0.000796792	0.0118655	0.00963426	CLASP2/FBXW11/UBXN2B/WASL/KPNB1/CLASP1/PAFAH1B1/DYNC1H1/DCTN1/HTT/ITGB1/SPIRE1/ACTR2/CDK5RAP2/NDE1/ZBED3/NUMA1/LLGL1/GJA1/ASPM/MISP/FGF10	22
BP	GO:0050770	regulation of axonogenesis	48/3781	154/18723	0.000814878	0.0120806	0.00980897	ADNP/DIP2B/EIF4G2/GSK3B/PAFAH1B1/BMPR2/ARHGAP35/PAK2/GOLGA4/MACF1/CYFIP1/RYK/RNF6/PSEN1/TRAK1/NIN/SHTN1/ULK2/RAB11A/TRAK2/SKIL/SEMA4F/CDKL5/PTEN/SEMA3C/SYNGAP1/KIF13B/SEMA5A/SPART/AMIGO1/SEMA3F/SLIT2/MAPT/SEMA4B/PTPRS/TIAM1/PLXNC1/WNT3/MAP1B/SEMA6D/WNT5A/FN1/RET/LRRC4C/LRP1/NTRK2/SEMA3E/SEMA3B	48
BP	GO:0071478	cellular response to radiation	56/3781	186/18723	0.000815151	0.0120806	0.00980897	TAF1/USP47/NIPBL/TP53BP1/CLOCK/POLK/SIRT1/ERCC4/DHX36/INO80/CREBBP/IMPACT/SDE2/XRCC5/EP300/CUL4B/XPC/ATR/EIF2AK4/RHBDD1/TENT2/ZBTB1/ZMPSTE24/MAPK14/CRY1/PPID/RAD1/FMR1/WRN/NMT1/NUCKS1/DDB1/EIF2S1/NEDD4/LIG4/ECT2/INTS7/SPIDR/MAP3K20/USP28/PARP1/TLK2/FIGNL1/ATM/MDM2/GRB2/POLD3/YAP1/TP53INP1/CRY2/PIK3R1/GATA3/NET1/PTPRK/CYBA/RHOB	56
BP	GO:0010820	positive regulation of T cell chemotaxis	9/3781	15/18723	0.000841203	0.0124072	0.0100742	WNK1/OXSR1/ADAM17/ADAM10/STK39/WNT5A/CCL5/S100A7/CXCL13	9
BP	GO:1900153	positive regulation of nuclear-transcribed mRNA catabolic process, deadenylation-dependent decay	9/3781	15/18723	0.000841203	0.0124072	0.0100742	DHX36/CNOT1/TNRC6B/CPEB3/CNOT7/TNRC6C/TOB1/AGO2/ZFP36L2	9
BP	GO:0044774	mitotic DNA integrity checkpoint signaling	30/3781	85/18723	0.000843976	0.0124185	0.0100833	GIGYF2/ATF2/RAD17/TAOK1/SDE2/XPC/ABRAXAS1/WAC/RINT1/TOPBP1/NBN/PRKDC/BRCC3/TAOK3/MRE11/MDC1/MSH2/MAP3K20/BRCA1/ATM/MDM2/RFWD3/NEK11/FOXN3/CCND1/FANCD2/CDKN1B/SOX4/DTL/PLK2	30
BP	GO:0006644	phospholipid metabolic process	103/3781	383/18723	0.000858606	0.0126038	0.0102337	PIK3C2A/SMG1/PIK3C3/SOCS4/SACM1L/PIGN/PIKFYVE/PAFAH1B1/NAPEPLD/MTMR1/IP6K1/FAR1/OCRL/PNPLA8/MTMR12/FAM126B/PI4KA/SELENOI/MTMR6/SERINC3/SERINC1/PIK3CA/PIK3CB/PIGO/ETNK1/SYNJ1/EFR3A/CEPT1/MTM1/BPNT2/SLC44A1/MECP2/SOCS6/SOCS5/PIGB/PIGK/LPCAT3/PIP5K1A/PLA2G12A/CDS1/MTMR9/PIGS/GDE1/SAMD8/OSBPL8/MTMR4/PIP4K2C/SYNJ2/INPP5B/CDS2/FITM2/PIGM/SERINC5/MTMR10/LPGAT1/PIGG/ACSL3/PIP4K2B/SOCS7/INPP4B/PI4K2B/PTEN…	103
BP	GO:0003231	cardiac ventricle development	40/3781	123/18723	0.000861947	0.0126228	0.0102492	HECTD1/TRIP11/PTCD2/BMPR2/SMAD4/ZMPSTE24/GRHL2/AP2B1/DCTN5/FRS2/BMPR1A/SUFU/LUZP1/NSD2/SAV1/ACVR1/CNTRL/MED1/SEMA3C/MDM2/MDM4/PKP2/DSP/TGFBR1/GREB1L/SOX4/HEG1/TBX3/GATA3/SLIT2/CHD7/LRP2/WNT5A/CITED2/TGFB2/SLIT3/FGFR2/CPE/TGFBR3/COL11A1	40
BP	GO:0061462	protein localization to lysosome	19/3781	46/18723	0.000869844	0.0126784	0.0102943	ZFYVE16/GCC2/AP3B1/AP3M1/M6PR/NCOA4/SCARB2/LMBRD1/NEDD4/HSPA8/ROCK2/SORT1/GNPTAB/LAMP2/SORL1/SNX16/SH3BP4/GPR137B/CACNG4	19
BP	GO:0070828	heterochromatin organization	19/3781	46/18723	0.000869844	0.0126784	0.0102943	TASOR/SMARCA5/SIRT1/BAZ2A/TPR/ZNF304/ATF7IP/SETDB1/PHF2/FAM172A/PHF8/SETD7/SMCHD1/MPHOSPH8/HP1BP3/RESF1/EZH1/ZNFX1/DNMT1	19
BP	GO:0060606	tube closure	31/3781	89/18723	0.000898606	0.0130668	0.0106097	SEC24B/SETD2/HECTD1/OPA1/TRAF6/ARHGAP35/PHACTR4/MED12/GRHL2/TSC1/ABL1/SHROOM3/SUFU/BRD2/CC2D2A/KIF20B/BBS4/TULP3/CELSR1/FZD3/SDC4/FZD6/STIL/LRP2/WNT5A/CITED2/TGFB2/RARA/COBL/PRKACB/FGF10	31
BP	GO:0099532	synaptic vesicle endosomal processing	7/3781	10/18723	0.000916023	0.0132577	0.0107647	AP3B1/EEA1/DNM1L/ITSN2/ITSN1/VAMP4/BTBD8	7
BP	GO:1990253	cellular response to leucine starvation	7/3781	10/18723	0.000916023	0.0132577	0.0107647	LARS1/IMPACT/MTOR/EIF2AK4/GCN1/RRAGB/SESN3	7
BP	GO:0050821	protein stabilization	57/3781	191/18723	0.000931747	0.0134537	0.0109239	TAF1/CREB1/PRKRA/MARCHF7/TRIM44/EP300/USP7/HIP1/ATF7IP/USP33/MORC3/USP9X/RABL3/TAF9B/BAG5/TSC1/HCFC1/NAA15/SEL1L/RAB21/NAA16/USP19/STX12/COG3/MTMR9/NAPG/PEX19/PTGES3/CREBL2/NLK/ZBED3/PDCD10/STXBP4/SEC16A/GOLGA7/OTUD3/GNAQ/SAV1/PARVA/STK4/LAMP2/USP13/PTEN/BAG4/TBL1X/CCT2/SMAD3/STK3/MDM4/PER3/HSP90AA1/WFS1/PIK3R1/SOX4/STXBP1/ATP1B1/TSPAN1	57
BP	GO:0048285	organelle fission	127/3781	488/18723	0.000945113	0.0136149	0.0110547	CUL3/ATRX/STAG2/NIPBL/TOP2B/PDS5A/CDC23/APC/CLASP2/CEP97/HNRNPU/TOGARAM1/ERCC4/UBXN2B/MARF1/VPS4B/PDS5B/KIF3B/MSH3/INO80/SLF2/KPNB1/AP3B1/SLC25A46/ANAPC1/PHIP/FANCM/TPR/KIF2A/FOXJ3/STAG1/OPA1/CDC27/CENPC/CLASP1/PRMT5/SMC3/ABRAXAS1/TMCC1/UBR2/MLH3/CDK13/ABRAXAS2/FOXJ2/MARCHF5/TNKS/BECN1/PRKAR1A/CEP192/USP16/CHAMP1/SPAST/BCL2L11/SLF1/SMC1A/NME6/SMC5/SMC2/RMI1/CHMP2B/RAD1/SLX4/NSL1/EPS8/POGZ/MLH1/WA…	127
BP	GO:0106027	neuron projection organization	32/3781	93/18723	0.000949553	0.0136312	0.0110679	CAPRIN1/UBE3A/WASL/DHX36/OPA1/GSK3B/PAFAH1B1/ABI2/DCTN1/ADAM10/DNM1L/PSEN1/ACTR2/EEF2K/TANC1/VPS35/ABHD17B/PLS1/PTEN/PPP1R9A/IGF1R/TANC2/ZMYND8/PDLIM5/INSR/HOMER1/MAP1A/TIAM1/CTNND2/ITGA3/SRCIN1/APOE	32
BP	GO:0006606	protein import into nucleus	48/3781	155/18723	0.000952763	0.0136312	0.0110679	TNPO1/IPO11/APPL1/IPO8/NUP98/IPO7/NUP58/UBR5/NUP133/KPNB1/KPNA1/TPR/KPNA6/RANBP2/FAM53C/POM121/NUP153/NUP155/RBM22/MAPK1/MAPK14/IPO9/APPL2/EFCAB7/RANBP6/NUP54/NUP188/PSEN1/SUFU/TNPO3/STAT3/NUP50/KPNA3/IPO5/NOLC1/GLI3/ECT2/RAB23/MAVS/NUP107/MED1/SMAD3/CSE1L/NXT2/CRY2/PIK3R1/PPP3CA/CDH1	48
BP	GO:0032970	regulation of actin filament-based process	106/3781	397/18723	0.000952858	0.0136312	0.0110679	CLASP2/GMFB/WASL/LATS1/ROCK1/TWF1/AP1AR/TAOK1/ALMS1/RICTOR/DLG1/MTOR/CLASP1/ARFGEF1/NCKAP1/CAPZA2/RASA1/ATP2A2/ABI2/ARFIP1/ARHGAP35/AKAP9/MTPN/PAK2/CD2AP/FER/SMAD4/IQGAP1/TSC1/SSH1/PIK3CA/ABL1/ADD1/CYFIP1/EPS8/TMOD3/JMY/WASHC5/SPTAN1/FMN1/SPIRE1/TJP1/ABL2/CRK/NOTCH2/ACTR2/DIXDC1/AKAP13/LIMA1/DSG2/TTC8/ECT2/ATP1A1/RHOBTB1/ROCK2/SPTBN1/SNX9/CARMIL1/WASF2/SSH2/PPFIA1/CELSR1/BAG4/PPP1R9A/SMAD3/SWAP70…	106
BP	GO:0110053	regulation of actin filament organization	78/3781	278/18723	0.000964137	0.0137607	0.0111731	CLASP2/GMFB/WASL/LATS1/ROCK1/TWF1/AP1AR/ALMS1/RICTOR/DLG1/MTOR/CLASP1/ARFGEF1/NCKAP1/CAPZA2/RASA1/ABI2/ARFIP1/ARHGAP35/MTPN/PAK2/FER/TSC1/SSH1/PIK3CA/ABL1/ADD1/CYFIP1/EPS8/TMOD3/JMY/WASHC5/SPTAN1/FMN1/SPIRE1/TJP1/ACTR2/LIMA1/TTC8/ROCK2/SPTBN1/SNX9/CARMIL1/WASF2/SSH2/PPFIA1/BAG4/PPP1R9A/SMAD3/SWAP70/GRB2/PRKCE/CRACD/SEMA5A/PREX1/SVIL/MYADM/TGFBR1/PHLDB2/RDX/PIK3R1/RHPN2/FERMT2/SLIT2/SYNPO2/LPAR1/S…	78
BP	GO:0046838	phosphorylated carbohydrate dephosphorylation	10/3781	18/18723	0.000980532	0.0138853	0.0112742	OCRL/SYNJ1/BPNT2/SYNJ2/INPP5B/INPP4B/PTEN/IMPA1/BPNT1/INPP5J	10
BP	GO:0030326	embryonic limb morphogenesis	38/3781	116/18723	0.000981855	0.0138853	0.0112742	NIPBL/CREBBP/LMBR1/INTU/LNPK/SMAD4/WDR19/GRHL2/BCL2L11/CTNNB1/PBX1/RPGRIP1L/DYNC2H1/BPNT2/TBC1D32/BMPR1A/PSEN1/C2CD3/NOTCH2/GLI3/TULP3/MAP3K20/FLVCR1/MED1/IFT140/AFF3/ECE1/TFAP2A/TBX3/FZD6/WNT3/CHD7/WNT5A/TGFB2/GREM1/EN1/GPC3/TP63	38
BP	GO:0031123	RNA 3'-end processing	38/3781	116/18723	0.000981855	0.0138853	0.0112742	CCNT1/YTHDC1/CTR9/SCAF8/CPSF6/ZC3H14/RNF20/ERI2/DHX36/PAPOLA/CDC73/PAPOLG/RPRD1A/CPSF2/RPRD1B/TENT2/NCBP1/NUDT21/LSM11/AHCYL1/EXOSC10/INTS14/RPRD2/INTS2/VIRMA/PCF11/CSTF2T/INTS6/INTS12/TUT7/CSTF2/RNF40/INTS7/CPEB3/TENT4B/LEO1/BARD1/INTS8	38
BP	GO:0035113	embryonic appendage morphogenesis	38/3781	116/18723	0.000981855	0.0138853	0.0112742	NIPBL/CREBBP/LMBR1/INTU/LNPK/SMAD4/WDR19/GRHL2/BCL2L11/CTNNB1/PBX1/RPGRIP1L/DYNC2H1/BPNT2/TBC1D32/BMPR1A/PSEN1/C2CD3/NOTCH2/GLI3/TULP3/MAP3K20/FLVCR1/MED1/IFT140/AFF3/ECE1/TFAP2A/TBX3/FZD6/WNT3/CHD7/WNT5A/TGFB2/GREM1/EN1/GPC3/TP63	38
BP	GO:0007032	endosome organization	29/3781	82/18723	0.000984428	0.0138899	0.011278	ALS2/USP8/PIK3C3/VPS4B/STAM2/HOOK1/PDCD6IP/ARFGEF2/DNAJC13/CLCN3/TMCC1/EEA1/WASHC4/CHMP3/EXOC8/CHMP2B/SYNJ1/STAM/WASHC5/SCARB2/TSG101/VPS36/VAMP4/VPS37A/RAB11A/VTA1/RNF26/PI4K2B/HOOK3	29
BP	GO:0031365	N-terminal protein amino acid modification	14/3781	30/18723	0.000987487	0.0139013	0.0112873	NAA35/NAA30/CREBBP/EP300/NAA25/PPM1A/NAA15/METAP2/NMT1/NAA16/NAA50/METAP1/HHAT/SOX4	14
BP	GO:0016032	viral process	110/3781	415/18723	0.00101965	0.0143214	0.0116284	CCNT1/DHX9/REST/TASOR/SP1/TOP2B/DDX3X/PKN2/ITCH/YTHDC2/SRPK2/VPS4B/TRIM32/PDCD6IP/EP300/KPNA6/PDE12/PIKFYVE/GSK3B/DAG1/CCNT2/SETDB1/HCFC2/EEA1/EIF3A/EIF2AK4/NUP153/CHD1/PI4KA/DDX6/CHMP3/HCFC1/ARL8B/DENR/LARP1/UBP1/HACD3/CHMP2B/IDE/PPID/ANO6/ZC3HAV1/CCNK/FMR1/ADAR/XPR1/EPS15/ITGB1/CANX/NUCKS1/SCARB2/MPHOSPH8/TSG101/CD46/DDB1/MID2/STAU1/NEDD4/KPNA3/WWP1/CSDE1/RSF1/LIG4/RNASEL/VPS37A/VAPB/HSPA8/EIF3…	110
BP	GO:0098930	axonal transport	24/3781	64/18723	0.00102808	0.0144068	0.0116977	FBXW11/KIF3B/AP3B1/AP3M1/KIF3A/OPA1/PAFAH1B1/KIF5B/BLOC1S6/DYNC1H1/SPAST/ARL8B/RAB21/TRAK1/KIF1B/TRAK2/ARMCX3/RAB27B/AP3M2/DST/MAP1A/KIF5C/MAPT/SYBU	24
BP	GO:0140014	mitotic nuclear division	80/3781	287/18723	0.00103039	0.0144068	0.0116977	CUL3/ATRX/STAG2/NIPBL/PDS5A/CDC23/APC/CLASP2/CEP97/HNRNPU/TOGARAM1/UBXN2B/VPS4B/PDS5B/KIF3B/INO80/SLF2/KPNB1/ANAPC1/PHIP/TPR/KIF2A/STAG1/CDC27/CENPC/CLASP1/PRMT5/SMC3/ABRAXAS1/CDK13/ABRAXAS2/TNKS/BECN1/CEP192/USP16/CHAMP1/SPAST/SLF1/SMC1A/NME6/SMC5/SMC2/CHMP2B/NSL1/EPS8/POGZ/TOM1L1/PIBF1/MIS12/REEP3/CDK5RAP2/NAA50/NDE1/KIF20B/CEP85/RAB11A/RB1/SMC4/MAP9/NCAPD3/NUMA1/ZWILCH/ATM/KNTC1/BUB3/RAD21/NCA…	80
BP	GO:0007026	negative regulation of microtubule depolymerization	13/3781	27/18723	0.00103722	0.0144342	0.01172	APC/CLASP2/TAOK1/CLASP1/CAMSAP1/TTBK2/CAMSAP2/ATXN7/HDGFL3/CKAP2/MAP1B/NAV3/BMERB1	13
BP	GO:0046174	polyol catabolic process	13/3781	27/18723	0.00103722	0.0144342	0.01172	OCRL/SYNJ1/BPNT2/SYNJ2/INPP5B/GPD2/GK5/INPP4B/PTEN/IMPA1/BPNT1/SORD/INPP5J	13
BP	GO:0018023	peptidyl-lysine trimethylation	20/3781	50/18723	0.00104169	0.0144342	0.01172	ATRX/SETD2/CTR9/SIRT1/ARID4A/SETD5/KMT2D/ZNF304/KMT2E/RTF1/WDR82/KMT5B/TET2/SETD1B/KMT2A/MECP2/ETFBKMT/TET3/OGT/NSD3	20
BP	GO:0045814	negative regulation of gene expression, epigenetic	20/3781	50/18723	0.00104169	0.0144342	0.01172	TASOR/SMARCA5/SIRT1/BAZ2A/TPR/ZNF304/ATF7IP/SETDB1/PHF2/FAM172A/PHF8/SMCHD1/MPHOSPH8/CREBZF/RESF1/EZH1/ZNFX1/DNMT1/PPM1D/BMI1	20
BP	GO:0007063	regulation of sister chromatid cohesion	11/3781	21/18723	0.00104843	0.0144409	0.0117254	WAPL/ATRX/CTCF/SLF2/TNKS/SLF1/SMC5/CTNNB1/RB1/RAD21/AXIN2	11
BP	GO:0035023	regulation of Rho protein signal transduction	30/3781	86/18723	0.00104918	0.0144409	0.0117254	CUL3/RAF1/SCAI/ARHGAP35/ABL1/EPS8/ITGB1/ABL2/OPHN1/AKAP13/TNFAIP1/RALBP1/CDC42SE1/STARD13/ARHGEF3/CCDC125/KANK2/ABCA1/ARHGEF28/ARRB1/F2R/HEG1/ARHGAP42/LPAR1/NET1/PDGFRB/ITGA3/APOE/COL3A1/F2RL2	30
BP	GO:2001251	negative regulation of chromosome organization	30/3781	86/18723	0.00104918	0.0144409	0.0117254	WAPL/ATRX/APC/HNRNPU/ERCC4/POT1/TNKS2/TPR/DCP2/SMG6/TNKS/NBN/EXOSC10/SLX4/XRN1/TERF1/CDK5RAP2/GNL3L/CTC1/TENT4B/PARP1/ZWILCH/ATM/KNTC1/BUB3/RAD21/MCM2/TOP2A/BUB1B/CENPF	30
BP	GO:0033619	membrane protein proteolysis	22/3781	57/18723	0.00105307	0.0144622	0.0117427	ROCK1/MBTPS2/DAG1/RHBDD1/ADAM17/ADAM10/LRIG2/PSEN1/MBTPS1/AFG3L2/SPPL2A/SH3D19/NCSTN/SNX9/BACE1/PTPN3/ERAP1/ADAM9/TIMP3/RET/APOE/TMPRSS6	22
BP	GO:0051647	nucleus localization	12/3781	24/18723	0.00106193	0.0145456	0.0118104	FBXW11/MTOR/PAFAH1B1/CEP120/DYNC1H1/DCTN1/DOCK7/PCM1/SYNE2/HOOK3/CLMN/SLC9A3R1	12
BP	GO:0006278	RNA-dependent DNA biosynthetic process	27/3781	75/18723	0.0010662	0.0145456	0.0118104	RFC1/HNRNPU/POT1/TNKS2/XRCC5/ATR/DCP2/SMG6/TNKS/MAPK1/EXOSC10/CTNNB1/XRN1/NEK7/NAF1/TERF1/RPA1/MRE11/GNL3L/PTGES3/MAP3K4/CTC1/TENT4B/ATM/CCT2/HSP90AA1/PKIB	27
BP	GO:0043627	response to estrogen	27/3781	75/18723	0.0010662	0.0145456	0.0118104	RBBP5/EP300/KMT2D/NCOA4/MAPK1/CTNNA1/TRIM24/GLI3/BRCA1/MDM2/BCAS3/ASH2L/TRIM25/CCND1/ESR1/GATA3/AR/PDGFRB/CITED2/TEK/TGFB3/RARA/IGFBP2/GSTM3/TNFRSF11B/F7/CA2	27
BP	GO:0034655	nucleobase-containing compound catabolic process	108/3781	407/18723	0.00108085	0.0146793	0.011919	GIGYF2/DHX9/PUM1/TTC37/PUM2/THRAP3/DCP1A/MTREX/METTL14/SMG1/HNRNPR/CNOT6/CELF1/XRN2/ZC3H14/PHAX/HNRNPU/ROCK1/DHX36/YTHDF3/GSPT1/NBAS/TNRC6A/MTOR/PDE12/ETF1/DCP2/DROSHA/CNOT6L/SMG6/RC3H2/FASTKD2/LRPPRC/TENT2/CNOT1/NCBP1/DIS3/MAPK14/FASTKD3/ANGEL2/SMG7/EXOSC10/LARP1/PAN2/AGO1/CNOT8/PAN3/METTL16/PAIP1/DICER1/XRN1/ZC3HAV1/FMR1/FXR1/MLH1/RC3H1/PNRC2/SECISBP2/NAF1/SMG8/TDG/TUT7/DIS3L/AGO4/AGO3/EDC4/CSD…	108
BP	GO:0045444	fat cell differentiation	66/3781	229/18723	0.00108095	0.0146793	0.011919	CREB1/NIPBL/ATF2/SIRT1/HNRNPU/ASXL2/TRIM32/SENP2/EP300/MTOR/NAPEPLD/PIAS1/NOC3L/OSBPL11/MAPK14/TRIO/RREB1/ASXL1/BBS2/FAM120B/CDS1/MEX3C/BBS7/BBS9/OSBPL8/RNASEL/PER2/BBS12/CREBL2/TTC8/ALDH6A1/ARNTL/BBS4/ANKRD26/FTO/SAV1/STK4/SORT1/MED1/ZADH2/SMAD3/STK3/ZNF516/YAP1/CTBP2/ERAP1/ENPP1/SOX13/CCND1/NOCT/XBP1/ARID5B/RETREG1/GATA3/FERMT2/PEX11A/ADGRF5/ZFP36L2/SOCS1/WNT5A/SREBF1/NR4A2/FGF10/MKX/SIX1/TFAP2B	66
BP	GO:0034329	cell junction assembly	111/3781	420/18723	0.00108314	0.0146793	0.011919	ADNP/APC/CLASP2/PKN2/PTPN11/HIPK1/ROCK1/SLK/PDCD6IP/DLG1/PDPK1/CLASP1/SETD5/STRN/CRKL/MPDZ/PAK2/DLG5/EPB41L5/MACF1/GRHL2/MYO9A/IQGAP1/MARVELD2/TSC1/CTNNA1/PTPRA/CTNNB1/PATJ/ABL1/PKP4/RAPGEF2/RYK/MECP2/FMN1/TJP1/OCLN/PIP5K1A/OPHN1/RAP1B/EEF2K/PTK2/MTDH/ECT2/NPTN/ROCK2/ITGA2/DUSP3/FARP1/PCLO/VPS35/FBXO45/VCL/SIX4/PEAK1/DCHS1/PTEN/SHANK2/THBS1/AFDN/PPP1R9A/SMAD3/BCL2/JAM3/BCAS3/MPP7/TLN2/CLSTN2/IKBK…	111
BP	GO:2000781	positive regulation of double-strand break repair	17/3781	40/18723	0.00109636	0.014826	0.0120381	ARID2/WDR48/RIF1/ERCC6/SLF2/KMT5B/SHLD2/SLF1/PRKDC/SMCHD1/SPIRE1/ACTR2/SPIDR/PARP1/TIMELESS/DTX3L/PARP9	17
BP	GO:0031668	cellular response to extracellular stimulus	70/3781	246/18723	0.0011358	0.0153187	0.0124381	PIK3R4/ADNP/SIRT1/LARS1/PIK3C3/IMPACT/FNIP1/TNRC6A/MTOR/VPS41/USP33/BMPR2/ARHGAP35/EIF2AK4/TNKS/BECN1/MAPK1/MAPK8/GCN1/ATG14/TSC1/ATP2B1/WRN/XPR1/DNM1L/CPEB4/MIOS/EIF2S1/NCOA1/SLC38A2/CBL/EIF2AK3/ZFYVE1/HSPA8/NFE2L2/TRIM24/FOXO3/RRAGB/EIF2AK2/STK24/RPTOR/LAMP2/MED1/KLF10/NUAK1/MDM2/BCL2/PDK2/PPM1D/KANK2/GLUL/ELAPOR1/WIPI1/XBP1/PRKAA1/RNF152/PMAIP1/PRKAA2/HFE/POSTN/BRIP1/GDAP1/SLC1A2/STK26/SESN3/S…	70
BP	GO:0032922	circadian regulation of gene expression	25/3781	68/18723	0.00113775	0.0153187	0.0124381	CLOCK/SIRT1/HNRNPU/KDM5A/HUWE1/TOP1/PRMT5/NCOA2/NRIP1/CRY1/KMT2A/RAI1/KDM2A/PER2/ZFHX3/NUDT12/ARNTL/OGT/MYCBP2/GFPT1/PER3/CRY2/BHLHE40/NOCT/LGR4	25
BP	GO:0001503	ossification	108/3781	408/18723	0.00118297	0.015893	0.0129044	DHX9/SMAD5/REST/NIPBL/NF1/SP3/PTPN11/HNRNPU/SNRNP200/DHX36/DNAJC13/TRAF6/INTU/NBR1/BMPR2/UFL1/IARS1/MAPK1/ZMPSTE24/MAPK14/BCOR/CTNNB1/ATP2B1/TXLNG/ACVR2B/PBX1/ZBTB40/ANO6/ADAR/BPNT2/BMPR1A/SUCO/SUFU/DDX21/MINPP1/EIF2AK3/ZHX3/SYNCRIP/PTK2/HSD17B4/SMAD1/GLI3/TOB2/IL6ST/ACVR1/TWSG1/TAPT1/SORT1/CLTC/DCHS1/FIGNL1/BMP2K/CCDC47/KLF10/CAT/SMAD3/CRIM1/BCL2/CHSY1/YAP1/RUNX1/NAB1/ENPP1/TUFT1/XYLT1/NOCT/NPNT…	108
BP	GO:0042752	regulation of circadian rhythm	39/3781	121/18723	0.00120016	0.0160889	0.0130635	CREB1/THRAP3/SIN3A/CLOCK/FBXW11/CIPC/UBE3A/USP7/MTOR/GSK3B/USP9X/MAPK8/FBXL17/CRY1/PRKDC/NR1D2/SRRD/DDB1/KDM2A/BTRC/FBXL3/PER2/MAPK9/ZFHX3/ARNTL/ROCK2/GNAQ/KLF10/TIMELESS/PER3/PHLPP1/CRY2/BHLHE40/NOCT/SIAH2/PRKAA1/TOP2A/PRKAA2/ADCY1	39
BP	GO:0030520	intracellular estrogen receptor signaling pathway	21/3781	54/18723	0.00121179	0.0162097	0.0131616	ARID1A/LATS1/STRN3/KMT2D/CNOT1/UFL1/NCOA4/DDX17/RBFOX2/UFSP2/PARP1/BRCA1/MED1/YAP1/KANK2/ESR1/AR/FOXA1/EGLN2/SRARP/TP63	21
BP	GO:0043473	pigmentation	33/3781	98/18723	0.00121574	0.0162273	0.0131759	NF1/ATRN/AP3B1/PIKFYVE/ARL6/HPS3/BLOC1S6/AP1G1/ATP7A/BCL2L11/SHROOM3/HPS5/BBS2/KIF13A/BBS7/ATP6AP2/GLI3/ARCN1/RAB11A/BBS4/VANGL1/LYST/RAB27B/MYO5A/USP13/SHROOM2/BCL2/KITLG/MREG/ENPP1/MLPH/EN1/RAB38	33
BP	GO:0021532	neural tube patterning	16/3781	37/18723	0.00121965	0.0162445	0.0131898	ARL13B/WDR19/RPGRIP1L/TBC1D32/PSEN1/SUFU/ATP6AP2/GLI3/TCTN1/TULP3/GORAB/IFT140/BMI1/FOXA1/EN1/PRKACB	16
BP	GO:0007369	gastrulation	55/3781	185/18723	0.00124733	0.0165774	0.0134602	CUL3/TASOR/SETD2/CTR9/CLASP2/CDC73/WNK1/CLASP1/EXOC4/DAG1/RTF1/BMPR2/PRKAR1A/SMAD4/EPB41L5/SMAD2/CTNNB1/FRS2/ITGB1/BMPR1A/LMBRD1/KIF16B/SMAD1/ITGAV/DLD/RNF2/ITGA2/LEO1/SUPT20H/ACVR1/TWSG1/SMAD3/UGDH/TXNRD1/PHLDB1/MYADM/PHLDB2/LAMA3/AMOT/GJA1/COL12A1/ITGB5/INHBA/WNT3/ITGA3/WNT5A/FN1/COL5A2/FGFR2/COL8A1/WLS/DUSP5/DUSP4/GPC3/COL11A1	55
BP	GO:0050808	synapse organization	112/3781	426/18723	0.00125451	0.016637	0.0135086	REST/ALS2/ADNP/CAPRIN1/UBE3A/WASL/DHX36/DLG1/OPA1/PAFAH1B1/SETD5/DAG1/ABI2/ERC1/CRKL/DLG5/MAPK14/DCTN1/TSC1/SSH1/CTNNB1/CHMP2B/ABL1/ADAM10/MYH10/CYFIP1/DNM1L/RYK/MECP2/PSEN1/OPHN1/APBB2/ACTR2/STAU1/PPFIBP1/NEDD4/ITSN1/AFG3L2/EEF2K/HSPA8/PTPRF/NPTN/TANC1/FARP1/PCLO/WASF2/VPS35/ABHD17B/FBXO45/NOS1AP/SIX4/CDKL5/PPFIA1/PTEN/SHANK2/PPP1R9A/CAST/SYNGAP1/IGF1R/UNC13B/TANC2/ZMYND8/CLSTN2/SEPTIN11/PCDHGC3…	112
BP	GO:0010977	negative regulation of neuron projection development	43/3781	137/18723	0.00126748	0.0167731	0.013619	UBE3A/DIP2B/THOC2/PAFAH1B1/BAG5/TSC1/DENND5A/CERS2/PTPN9/CBFA2T2/RYK/LRIG2/RNF6/PSEN1/ADCY6/ULK2/TRAK2/SEMA4F/PTPRG/PTEN/SEMA3C/MDM2/SYNGAP1/INPP5F/PAQR3/MYLIP/FKBP4/SEMA5A/SPART/SEMA3F/LPAR1/SEMA4B/PTPRS/WNT3/INPP5J/RTN4RL1/SEMA6D/WNT5A/SPOCK1/LRP1/APOE/SEMA3E/SEMA3B	43
BP	GO:0001837	epithelial to mesenchymal transition	48/3781	157/18723	0.00129166	0.0170565	0.0138491	TASOR/CLASP2/ROCK1/USF3/KLHL12/MTOR/CLASP1/GSK3B/DAG1/POLR1B/SMAD4/DLG5/EPB41L5/SMAD2/CTNNB1/DDX17/LRP6/NOLC1/BCL9L/SPRED2/ROCK2/ACVR1/PTEN/LDLRAD4/SMAD3/SPRED1/PHLDB1/IL17RD/TGFBR1/PHLDB2/AXIN2/TBX3/GATA3/FERMT2/FOXA1/TIAM1/FGFR1/WNT5A/PDCD4/TGFB3/TGFB2/EPHA3/FGFR2/ZNF703/GREM1/OLFM1/TGFBR3/HPN	48
BP	GO:2000278	regulation of DNA biosynthetic process	35/3781	106/18723	0.00130335	0.0171129	0.0138949	HNRNPU/POT1/TNKS2/XRCC5/ATR/DCP2/SMG6/BMPR2/TNKS/MAPK1/GRHL2/EXOSC10/CTNNB1/XRN1/NEK7/NAF1/TERF1/GNL3L/PTGES3/MAP3K4/CTC1/RFC5/PARP4/TENT4B/ATM/CCT2/NVL/HSP90AA1/RFC3/DACH1/DDX39B/GJA1/PDGFRB/GREM1/PKIB	35
BP	GO:0061512	protein localization to cilium	24/3781	65/18723	0.0013219	0.0171129	0.0138949	TTC26/WDR35/ARL13B/ARL6/FAM149B1/RABEP1/TCTN2/WDR19/TTC21B/EFCAB7/LZTFL1/DYNC2H1/TBC1D32/BBS9/CC2D2A/CCDC66/BBS4/TCTN1/TULP3/IFT140/ARL3/RAB11FIP3/TUB/ZMYND10	24
BP	GO:0090307	mitotic spindle assembly	24/3781	65/18723	0.0013219	0.0171129	0.0138949	STAG2/CLASP2/CEP97/HNRNPU/TOGARAM1/VPS4B/KIF3B/KPNB1/TPR/KIF2A/STAG1/CLASP1/SMC3/ABRAXAS1/ABRAXAS2/CEP192/SMC1A/CHMP2B/PIBF1/RAB11A/MAP9/RACGAP1/KIF11/MISP	24
BP	GO:0031396	regulation of protein ubiquitination	61/3781	210/18723	0.00132446	0.0171129	0.0138949	CUL3/TAF1/RNF111/CTR9/DDX3X/XIAP/WDR48/RNF20/UBE3A/TRIP12/UBR5/MARCHF7/TRIM44/UBQLN1/HUWE1/SENP2/FANCM/PAXIP1/MTOR/TOPORS/TRAF6/SPOPL/RCHY1/DCUN1D1/UFL1/DCUN1D4/BAG5/PRMT3/CRY1/ABL1/PSEN1/SPRTN/NDFIP1/BTRC/RNF40/GNL3L/PER2/BIRC2/MAPK9/NDFIP2/SKP1/OTUB2/OGT/BRCA1/MYCBP2/PTEN/GCLC/HSP90AA1/DTX3L/PRKCE/FANCI/WFS1/BMI1/SASH1/TGFBR1/ARRDC3/SIAH2/ARRB1/SOX4/ARRDC4/ISG15	61
BP	GO:0032968	positive regulation of transcription elongation from RNA polymerase II promoter	8/3781	13/18723	0.00132638	0.0171129	0.0138949	SUPT16H/CDC73/CDK13/CTNNB1/TCERG1/SUPT6H/LEO1/CDK12	8
BP	GO:0035721	intraciliary retrograde transport	8/3781	13/18723	0.00132638	0.0171129	0.0138949	WDR35/WDR19/TTC21B/DYNC2H1/CILK1/DYNC2LI1/DYNC2I1/IFT140	8
BP	GO:0072393	microtubule anchoring at microtubule organizing center	8/3781	13/18723	0.00132638	0.0171129	0.0138949	KIF3A/GSK3B/DCTN1/NIN/PCM1/BBS4/HOOK3/CEP19	8
BP	GO:0090161	Golgi ribbon formation	8/3781	13/18723	0.00132638	0.0171129	0.0138949	TRIP11/GCC2/PRMT5/GOLPH3/TMED5/VAMP4/FHDC1/MYO18A	8
BP	GO:1900103	positive regulation of endoplasmic reticulum unfolded protein response	8/3781	13/18723	0.00132638	0.0171129	0.0138949	ATF6/BCL2L11/TMEM33/PTPN1/ERN1/PIK3R1/XBP1/AGR2	8
BP	GO:1902043	positive regulation of extrinsic apoptotic signaling pathway via death domain receptors	8/3781	13/18723	0.00132638	0.0171129	0.0138949	SKIL/STK4/PTEN/THBS1/STK3/PMAIP1/TIMP3/BMPR1B	8
BP	GO:1905269	positive regulation of chromatin organization	8/3781	13/18723	0.00132638	0.0171129	0.0138949	TASOR/TPR/ZNF304/ATF7IP/SETDB1/MPHOSPH8/RESF1/DNMT1	8
BP	GO:0090174	organelle membrane fusion	36/3781	110/18723	0.00134034	0.0172568	0.0140118	TGFBRAP1/ANKFY1/SPG11/GOSR1/VPS8/PIKFYVE/VPS41/KIF5B/C2CD5/EEA1/MFN1/VPS39/STX17/SNAP23/CHMP3/ARL8B/CHMP2B/YIPF5/USO1/STX12/VCPIP1/VAMP4/SNAP29/PIP4K2B/SEPTIN8/SEC22B/VAV3/CPLANE2/RAB8B/STXBP1/TBC1D4/SYT7/SAMD9/SYT9/SYT1/SYT13	36
BP	GO:0051973	positive regulation of telomerase activity	15/3781	34/18723	0.00134563	0.0172569	0.0140119	POT1/XRCC5/TNKS/MAPK1/GRHL2/CTNNB1/NEK7/NAF1/PTGES3/MAP3K4/CCT2/NVL/HSP90AA1/GREM1/PKIB	15
BP	GO:0090150	establishment of protein localization to membrane	73/3781	260/18723	0.00134593	0.0172569	0.0140119	PREPL/CHM/CNST/RAB3GAP2/AP3B1/PIKFYVE/ARL6/C2CD5/SRP72/PRKCI/GOLGA4/TOMM70/MAPK8/MACF1/TCAF1/BRAF/RAB3GAP1/ATP2C1/NMT1/EMC1/BBS2/BLZF1/KIF13A/RAB10/ATAD1/ZDHHC21/GOLPH3/TIMM10B/MMGT1/PEX19/SRP54/VPS37A/NSF/ZDHHC20/HSPA4/LYPLA1/GOPC/RAB11A/SEC62/SEC16A/GOLGA7/SPTBN1/MOAP1/VPS35/ACSL3/GGA2/SRP9/PEX5/CCDC47/AFDN/TRAM2/TRAM1/GOLPH3L/ARL6IP1/NPC1/HSP90AA1/TRAM1L1/RAB3IP/ZDHHC23/ANK3/RAB8B/RAB31/GRIP1/…	73
BP	GO:0045930	negative regulation of mitotic cell cycle	67/3781	235/18723	0.0013537	0.0173206	0.0140636	GIGYF2/USP47/APC/ATF2/RAD17/YTHDC2/CDC73/TAOK1/SDE2/TPR/DLG1/RBL2/XPC/ABRAXAS1/WAC/RINT1/CTDSP2/TOPBP1/NBN/ANGEL2/NME6/CTNNB1/ABL1/PRKDC/BRCC3/WEE1/TAOK3/TOM1L1/MRE11/CDK5RAP2/RB1/MDC1/MSH2/MAP3K20/CTDSPL/ZWILCH/BRCA1/PKD2/PTEN/ATM/PTPN3/ZNF655/KNTC1/MDM2/RFWD3/SMAD3/BCL2/BUB3/RAD21/NEK11/FOXN3/KANK2/CCND1/FANCD2/CDKN1B/TOM1L2/RBL1/SOX4/FZD3/E2F7/BUB1B/DTL/ZFP36L2/PLK2/CENPF/SLC9A3R1/BTG2	67
BP	GO:0006354	DNA-templated transcription, elongation	31/3781	91/18723	0.00136193	0.01739	0.0141199	CCNT1/SETD2/CTR9/ARID1A/SCAF8/HNRNPU/ZMYND11/SUPT16H/ERCC6/CDC73/SETD5/EAF1/RTF1/CCNT2/CDK13/ARID1B/CTNNB1/CCNK/TCERG1/ZMIZ1/ZNF326/TEFM/KAT7/SUPT6H/RNF168/WDR43/LEO1/CDK12/SERTAD2/ELP2/DDX39B	31
BP	GO:0044380	protein localization to cytoskeleton	22/3781	58/18723	0.00137713	0.0175477	0.014248	APC/HNRNPU/NEDD1/UBXN2B/CEP350/GOLGB1/GSK3B/KIAA0753/CEP192/CHAMP1/TTBK2/PIBF1/C2CD3/MID2/PCM1/KIF20B/BBS4/ABHD17B/NUMA1/HOOK3/MAP1A/STIL	22
BP	GO:0030111	regulation of Wnt signaling pathway	89/3781	328/18723	0.00138663	0.0176325	0.0143168	USP47/CHD8/CSNK1G3/CSNK1A1/USP8/DDX3X/APC/CSNK1G1/XIAP/SPIN1/USP34/UBR5/LATS1/CDC73/SCYL2/SENP2/KPNA1/WNK1/TNKS2/ZRANB1/HMGXB4/GSK3B/PPM1A/TNKS/MAPK14/G3BP1/MACF1/VGLL4/TTC21B/ABL1/GSKIP/PSEN1/TBL1XR1/BTRC/DIXDC1/ATP6AP2/NLK/ZBED3/GLI3/ARNTL/FOXO3/GNAQ/STK4/NFKB1/ZNRF3/TLE3/TBL1X/TMEM170B/SMAD3/STK3/CDK14/SMURF2/TPBG/YAP1/MCC/RNF213/SEMA5A/AMFR/SOX13/LYPD6/SIAH2/CCDC88C/AXIN2/SOX4/MLLT3/LGR4/FZD6…	89
BP	GO:0001654	eye development	99/3781	371/18723	0.00140147	0.0177846	0.0144403	NIPBL/NF1/XRN2/SP3/HIPK1/ATF6/DLG1/OPA1/TTLL5/TOPORS/ABI2/BMPR2/ARHGAP35/PRKCI/TENT2/PHACTR4/KDM5B/CEP290/WDR19/GRHL2/RRM1/CTNNB1/ATP2B1/ACVR2B/PBX1/FRS2/RAB3GAP1/RPGRIP1L/TUG1/TBC1D32/MDM1/PSEN1/SALL2/STAT3/NOTCH2/BBS7/SOS1/USP45/CC2D2A/RAB18/TTC8/SIPA1L3/GLI3/SPRED2/ZHX2/BBS4/TDRD7/ACTL6A/MAN2A1/TULP3/SKIL/TWSG1/MED1/DZANK1/SHROOM2/AHI1/SMAD3/BCL2/IFT140/THRB/ATP2B4/CLIC4/HIPK2/SPRED1/NHS/SLC25…	99
BP	GO:0048145	regulation of fibroblast proliferation	28/3781	80/18723	0.00143124	0.0181251	0.0147168	DHX9/WAPL/CREB1/NF1/TRIM32/CDC73/MORC3/ZMPSTE24/CTNNB1/PRKDC/ZMIZ1/LIG4/CTC1/PAWR/PEX2/MYB/TP53INP1/DACH1/ESR1/BMI1/FOSL2/PDGFC/PDGFD/DDR2/PDGFRB/WNT5A/FN1/FGF10	28
BP	GO:0061138	morphogenesis of a branching epithelium	54/3781	182/18723	0.00144294	0.018236	0.0148068	FEM1B/BTBD7/DLG1/DAG1/GZF1/SMAD4/DLG5/KDM5B/GRHL2/CTNNB1/ABL1/PBX1/FRS2/KRAS/BTRC/GLI3/STK4/ACVR1/SIX4/DCHS1/PKD2/CELSR1/MED1/SEMA3C/BCL2/GRB2/YAP1/PKD1/CLIC4/DDR1/EDNRA/ESR1/NPNT/GREB1L/TBX3/PGR/SLIT2/AR/LGR4/FOXA1/LAMA5/SULF1/WNT5A/NTN4/FGF1/FGFR2/GREM1/TNC/AREG/SEMA3E/GPC3/TP63/FGF10/SIX1	54
BP	GO:0071496	cellular response to external stimulus	87/3781	320/18723	0.00146254	0.0184459	0.0149773	PIK3R4/ADNP/SIRT1/PTPN11/LARS1/PIK3C3/IMPACT/FNIP1/MAP3K2/TNRC6A/MTOR/VPS41/DAG1/USP33/BMPR2/ARHGAP35/EIF2AK4/TNKS/MTPN/BECN1/MAPK1/MAPK8/GCN1/ATG14/TSC1/CASP8AP2/ATP2B1/WRN/XPR1/DNM1L/CPEB4/MIOS/EIF2S1/NCOA1/SLC38A2/CBL/EIF2AK3/MAP3K1/ZFYVE1/HSPA8/NFE2L2/TRIM24/ATP1A1/FOXO3/RRAGB/EIF2AK2/ITGA2/STK24/MAP2K4/NFKB1/RPTOR/LAMP2/MED1/KLF10/NUAK1/MDM2/GCLC/BCL2/PDK2/PPM1D/KANK2/GLUL/ELAPOR1/WIPI1/XBP1…	87
BP	GO:0060070	canonical Wnt signaling pathway	83/3781	303/18723	0.00146628	0.0184554	0.014985	USP47/CHD8/CSNK1G3/CSNK1A1/USP8/DDX3X/APC/CSNK1G1/XIAP/USP34/UBR5/LATS1/SCYL2/KPNA1/WNK1/TNKS2/GSK3B/PPM1A/TNKS/MAPK14/G3BP1/MED12/CTNNB1/TTC21B/RYK/GSKIP/PSEN1/TBL1XR1/BCL9/BTRC/DIXDC1/LRP6/ATP6AP2/BCL9L/ZBED3/GLI3/ARNTL/FOXO3/GNAQ/STK4/NFKB1/ZNRF3/PTEN/TLE3/TBL1X/TMEM170B/SMAD3/STK3/CDK14/SMURF2/TPBG/YAP1/MCC/SEMA5A/AMFR/SOX13/LYPD6/SIAH2/CCDC88C/AXIN2/SOX4/FZD3/MLLT3/GATA3/LGR4/FZD6/WNT3/CTNND…	83
BP	GO:0032273	positive regulation of protein polymerization	43/3781	138/18723	0.0014873	0.0186819	0.0151689	GMFB/TOGARAM1/WASL/AP1AR/RICTOR/DLG1/MTOR/CLASP1/NCKAP1/ABI2/ARFIP1/AKAP9/FER/DCTN1/SLAIN2/CKAP5/CLIP1/CYFIP1/JMY/WASHC5/MECP2/FMN1/SPIRE1/OCLN/NIN/ACTR2/CDK5RAP2/SNX9/CARMIL1/WASF2/NUMA1/BAG4/GRB2/HSP90AA1/PRKCE/CRACD/ARL3/CDKN1B/MAPT/IQGAP2/MAP1B/NAV3/EVL	43
BP	GO:0042326	negative regulation of phosphorylation	102/3781	385/18723	0.0015434	0.0193472	0.0157091	NF1/IPO7/APC/IBTK/SUZ12/SIRT1/HNRNPU/SMCR8/SOCS4/LATS1/ROCK1/PRKAR2A/IMPACT/WNK1/PDPK1/MTOR/TRAF3IP1/GGNBP2/RUBCN/CRKL/NCOR1/PRKAR1A/PAK2/CTDSP2/HIPK3/HMGCR/ATG14/PPP1R15B/AIDA/SNX6/PIK3CB/ABL1/ZNF675/PRKDC/ADAR/PPP2R5D/GSKIP/SOCS5/PSEN1/TSG101/PIBF1/OCLN/STAT3/CBL/PRDX3/LRP6/SPAG9/PIP4K2C/IPO5/YWHAG/DNAJC10/CEP85/ZBED3/PTPN13/SPRED2/INCA1/RB1/NNT/GNAQ/DUSP3/SNX25/PIP4K2B/CTDSPL/COX11/PTEN/GPD1L/…	102
BP	GO:0045739	positive regulation of DNA repair	26/3781	73/18723	0.00156363	0.0195594	0.0158814	DHX9/ARID2/WDR48/RIF1/SIRT1/ERCC6/SLF2/ABRAXAS1/KMT5B/SHLD2/SLF1/EYA3/PRKDC/BRCC3/SMCHD1/SPIRE1/ACTR2/RNF168/FAM168A/SPIDR/PARP1/BRCA1/TIMELESS/DTX3L/PARP9/FGF10	26
BP	GO:0006275	regulation of DNA replication	35/3781	107/18723	0.00156665	0.0195594	0.0158814	DHX9/WAPL/ATRX/PDS5A/USP37/RAD17/ATF1/RBBP6/INO80/ANKRD17/BRPF3/ATR/SMC3/ZMPSTE24/NBN/ESCO1/ZBTB38/LIG3/NUCKS1/TERF1/KAT7/TNFAIP1/CTC1/RFC5/ORC3/MAP2K4/ATAD5/TIMELESS/RFC3/DACH1/BRCA2/DNA2/ESCO2/E2F7/BCAR3	35
BP	GO:0010819	regulation of T cell chemotaxis	9/3781	16/18723	0.00157894	0.019673	0.0159737	WNK1/OXSR1/ADAM17/ADAM10/STK39/WNT5A/CCL5/S100A7/CXCL13	9
BP	GO:0001843	neural tube closure	30/3781	88/18723	0.00159277	0.0198054	0.0160812	SEC24B/SETD2/HECTD1/OPA1/TRAF6/ARHGAP35/PHACTR4/MED12/GRHL2/TSC1/ABL1/SHROOM3/SUFU/BRD2/CC2D2A/KIF20B/BBS4/TULP3/CELSR1/FZD3/SDC4/FZD6/STIL/LRP2/WNT5A/CITED2/TGFB2/RARA/COBL/PRKACB	30
BP	GO:0090287	regulation of cellular response to growth factor stimulus	83/3781	304/18723	0.00162461	0.0201608	0.0163697	CTDSPL2/RNF111/XIAP/SIRT1/LATS1/LEMD3/CREBBP/EP300/DSTYK/PDPK1/TRIM33/PPM1A/BMPR2/ZDHHC17/UBE2D3/ARNT/SMAD4/ADAM17/EPN2/SMAD2/SNX6/CTNNB1/PIK3CB/ABL1/CYFIP1/NOTCH2/NEDD4/MTMR4/BCL9L/SPRED2/NPTN/STRAP/SNX25/SKIL/CASK/TWSG1/NUMA1/NEO1/THBS1/SORL1/PBLD/LDLRAD4/SMAD3/CRIM1/ELAPOR2/PCSK6/SMURF2/ATP2B4/PTPN1/HIPK2/SPART/SPRED1/IL17RD/NPNT/SLC2A10/GATA3/TOB1/ADAMTS12/SLIT2/FBN1/SULF1/CYFIP2/LRP2/FGFR1/I…	83
BP	GO:0061136	regulation of proteasomal protein catabolic process	55/3781	187/18723	0.00163307	0.0202252	0.016422	TAF1/CSNK1A1/HECTD1/ZYG11B/SOCS4/MARCHF7/XPO1/ANKIB1/UBQLN1/TMTC3/USP7/UBE2K/GSK3B/SMARCC1/RYBP/TMF1/ARIH1/UBQLN2/RCHY1/WAC/PIAS1/FBXW8/RAD23B/UFL1/BAG5/RNF14/PSME3/FMR1/USP19/SOCS5/PSEN1/OPHN1/BTRC/RNF40/BBS7/MAPK9/STYX/NFE2L2/USP14/PSMC1/OGT/USP13/TLK2/SVIP/USP25/MDM2/GCLC/RNF19A/ALAD/UBQLN4/PKD1/MAP1A/HFE/PLK2/APOE	55
BP	GO:0090630	activation of GTPase activity	37/3781	115/18723	0.00163673	0.02023	0.0164259	RABGAP1/RALGAPB/TBC1D5/RALGAPA1/TBC1D15/TBC1D14/CRKL/TBCK/EVI5/TBC1D12/TSC1/EIF5/PIP5K1A/CRK/DOCK7/TBC1D9B/SIPA1L3/ECT2/SYDE2/RUNDC1/TBC1D8B/TBC1D9/ARHGAP29/TBC1D2B/BCAS3/RALGAPA2/CCDC125/ARHGEF26/GARNL3/TBC1D16/TBC1D8/ARHGAP42/SIPA1L2/TBC1D4/TIAM1/WNT5A/CXCL13	37
BP	GO:0009101	glycoprotein biosynthetic process	86/3781	317/18723	0.00165979	0.0204303	0.0165885	FKTN/POFUT1/GXYLT1/TRIP11/DPY19L4/OGA/TMTC3/ALG10B/ALG11/ARFGEF1/BMPR2/MAN1A2/ACER2/ATP7A/FAM20B/EDEM3/TET2/UGGT1/CTNNB1/DPY19L3/RXYLT1/MAGT1/UGGT2/STT3B/PSEN1/ALG10/GOLPH3/TRAK1/EXTL2/COG3/GLCE/CSGALNACT2/HS2ST1/B3GALNT1/TMTC2/MGAT5/NCSTN/PAWR/NDST1/TRAK2/PMM2/MAN2A1/B3GNT2/TET3/MAN2A2/PXYLP1/TMTC4/OGT/GALNT1/CANT1/BCL2/LARGE1/CHSY1/GFPT1/NPC1/FUT8/CHST15/GALNT7/UGDH/MGAT4A/DPY19L1/ENTPD5/ST8SIA…	86
BP	GO:0072163	mesonephric epithelium development	31/3781	92/18723	0.00166285	0.0204303	0.0165885	SMAD5/DLG1/GZF1/SMAD4/SMAD2/CTNNB1/PBX1/FMN1/SMAD1/GLI3/SIX4/DCHS1/PKD2/CAT/SMAD3/BCL2/PKD1/NPNT/GREB1L/GATA3/SLIT2/SDC4/LGR4/LAMA5/RET/FGF1/RARA/FGFR2/GREM1/GPC3/SIX1	31
BP	GO:0072164	mesonephric tubule development	31/3781	92/18723	0.00166285	0.0204303	0.0165885	SMAD5/DLG1/GZF1/SMAD4/SMAD2/CTNNB1/PBX1/FMN1/SMAD1/GLI3/SIX4/DCHS1/PKD2/CAT/SMAD3/BCL2/PKD1/NPNT/GREB1L/GATA3/SLIT2/SDC4/LGR4/LAMA5/RET/FGF1/RARA/FGFR2/GREM1/GPC3/SIX1	31
BP	GO:0010827	regulation of glucose transmembrane transport	27/3781	77/18723	0.00167225	0.020505	0.0166492	APPL1/PTPN11/ARPP19/C2CD5/PRKCI/STXBP3/MAPK14/BRAF/APPL2/OCLN/OSBPL8/RNASEL/CREBL2/MEF2A/NFE2L2/STXBP4/ADIPOR2/IRS1/INSR/ENPP1/EDNRA/HK2/PIK3R1/YES1/SORBS1/SLC1A2/GPC3	27
BP	GO:0045947	negative regulation of translational initiation	10/3781	19/18723	0.00169696	0.0206849	0.0167952	TPR/EIF2AK4/LARP1/PAIP2/FMR1/EIF2S1/EIF2AK3/EIF4EBP2/PAIP2B/AGO2	10
BP	GO:0051571	positive regulation of histone H3-K4 methylation	10/3781	19/18723	0.00169696	0.0206849	0.0167952	CTR9/PAXIP1/KMT2E/RTF1/SMAD4/CTNNB1/KMT2A/BRCA1/DNMT1/MYB	10
BP	GO:0071545	inositol phosphate catabolic process	10/3781	19/18723	0.00169696	0.0206849	0.0167952	OCRL/SYNJ1/BPNT2/SYNJ2/INPP5B/INPP4B/PTEN/IMPA1/BPNT1/INPP5J	10
BP	GO:0002320	lymphoid progenitor cell differentiation	11/3781	22/18723	0.00171642	0.0207466	0.0168453	FNIP1/SOS2/NUDT21/ZBTB1/PRKDC/SOS1/LIG4/BCL2/SOX4/GATA3/FLT3	11
BP	GO:0045540	regulation of cholesterol biosynthetic process	11/3781	22/18723	0.00171642	0.0207466	0.0168453	MBTPS2/ERLIN1/LPCAT3/MBTPS1/ERLIN2/PRKAA1/ABCG1/FGF1/APOE/SREBF1/SEC14L2	11
BP	GO:0106118	regulation of sterol biosynthetic process	11/3781	22/18723	0.00171642	0.0207466	0.0168453	MBTPS2/ERLIN1/LPCAT3/MBTPS1/ERLIN2/PRKAA1/ABCG1/FGF1/APOE/SREBF1/SEC14L2	11
BP	GO:0140467	integrated stress response signaling	11/3781	22/18723	0.00171642	0.0207466	0.0168453	QRICH1/IMPACT/EIF2AK4/PPP1R15B/TMEM33/EIF2S1/OMA1/EIF2AK3/NFE2L2/PTPN1/AGR2	11
BP	GO:0090101	negative regulation of transmembrane receptor protein serine/threonine kinase signaling pathway	41/3781	131/18723	0.00172125	0.0207466	0.0168453	CTDSPL2/SIRT1/LEMD3/PDPK1/TRIM33/PPM1A/UBE2D3/ADAM17/SNX6/ABL1/MTMR4/BCL9L/SPRED2/STRAP/SNX25/SKIL/ACVR1/TWSG1/SORL1/PBLD/NOMO3/LDLRAD4/CRIM1/SMURF2/HIPK2/SPART/SPRED1/IL17RD/SLC2A10/TOB1/FBN1/LRP2/WNT5A/CD109/TGFB3/LRP1/GREM1/TGFBR3/ASPN/CILP/PEG10	41
BP	GO:0072331	signal transduction by p53 class mediator	49/3781	163/18723	0.00172329	0.0207466	0.0168453	ATRX/TAF1/HNRNPK/SIRT1/HIPK1/MARCHF7/MYO6/EP300/USP7/PAXIP1/MTOR/PRMT5/TOPORS/ATR/ACER2/KAT6A/DYRK1A/TAF9B/ZMPSTE24/NBN/JMY/RFFL/USP10/TRIM24/RRM2B/SPRED2/MSH2/FOXO3/USP28/ATM/NUAK1/MDM2/BCL2/MDM4/PDK2/PPM1D/RPS6KA6/HIPK2/SPRED1/PLA2R1/BRCA2/CDKN1B/SOX4/EDA2R/E2F7/PMAIP1/PLK2/TP63/ZNF385B	49
BP	GO:0001823	mesonephros development	32/3781	96/18723	0.00172592	0.0207466	0.0168453	SMAD5/DLG1/GZF1/SMAD4/SMAD2/CTNNB1/PBX1/FMN1/SMAD1/GLI3/SIX4/DCHS1/PKD2/CAT/SMAD3/BCL2/PKD1/NPNT/GREB1L/GATA3/SLIT2/SDC4/LGR4/LAMA5/RET/FGF1/RARA/FGFR2/GREM1/GPC3/FGF10/SIX1	32
BP	GO:1901215	negative regulation of neuron death	60/3781	208/18723	0.00172958	0.0207466	0.0168453	CREB1/REST/ADNP/SIRT1/BTBD10/PDPK1/GSK3B/RASA1/PRKCI/AP2B1/TSC1/OXR1/PIK3CA/SNX6/CTNNB1/REL/MECP2/KRAS/PSEN1/CPEB4/STAT3/CBL/LIG4/NMNAT1/MSH2/PSMC1/VPS35/MAP2K4/SIX4/ERBB3/SLC23A2/SORL1/SYNGAP1/GCLC/BCL2/GBE1/GCLM/PPT1/HIPK2/HYOU1/WFS1/ARRB1/F2R/UNC5B/RETREG1/STXBP1/TOX3/GHR/TGFB3/LRP1/CX3CR1/APOE/HLA-F/NR4A2/BTG2/NTRK2/EN1/SLC1A1/SIX1/TFAP2B	60
BP	GO:0051170	import into nucleus	48/3781	159/18723	0.00173224	0.0207466	0.0168453	TNPO1/IPO11/APPL1/IPO8/NUP98/IPO7/NUP58/UBR5/NUP133/KPNB1/KPNA1/TPR/KPNA6/RANBP2/FAM53C/POM121/NUP153/NUP155/RBM22/MAPK1/MAPK14/IPO9/APPL2/EFCAB7/RANBP6/NUP54/NUP188/PSEN1/SUFU/TNPO3/STAT3/NUP50/KPNA3/IPO5/NOLC1/GLI3/ECT2/RAB23/MAVS/NUP107/MED1/SMAD3/CSE1L/NXT2/CRY2/PIK3R1/PPP3CA/CDH1	48
BP	GO:1901888	regulation of cell junction assembly	59/3781	204/18723	0.0017576	0.0210096	0.0170589	ADNP/CLASP2/PTPN11/ROCK1/SLK/CLASP1/SETD5/DLG5/EPB41L5/MACF1/IQGAP1/TSC1/PTPRA/ABL1/RAPGEF2/FMN1/TJP1/RAP1B/EEF2K/PTK2/ROCK2/DUSP3/FARP1/VPS35/VCL/SIX4/PEAK1/PTEN/THBS1/PPP1R9A/SMAD3/BCAS3/CLSTN2/IKBKB/TPBG/PDLIM5/AMIGO1/PHLDB2/THBS2/FERMT2/GJA1/SDC4/PTPRS/AMIGO2/LRRN1/WNT5A/TEK/LRP1/FLRT3/LIMCH1/EPHA3/GPC4/SLITRK6/GREM1/NTRK2/OXTR/CNTNAP2/SIX1/CBLN2	59
BP	GO:0048144	fibroblast proliferation	28/3781	81/18723	0.0017722	0.0211432	0.0171674	DHX9/WAPL/CREB1/NF1/TRIM32/CDC73/MORC3/ZMPSTE24/CTNNB1/PRKDC/ZMIZ1/LIG4/CTC1/PAWR/PEX2/MYB/TP53INP1/DACH1/ESR1/BMI1/FOSL2/PDGFC/PDGFD/DDR2/PDGFRB/WNT5A/FN1/FGF10	28
BP	GO:0046324	regulation of glucose import	22/3781	59/18723	0.00178281	0.0212288	0.0172369	APPL1/PTPN11/ARPP19/PRKCI/STXBP3/MAPK14/APPL2/OCLN/OSBPL8/RNASEL/CREBL2/MEF2A/NFE2L2/ADIPOR2/IRS1/INSR/ENPP1/HK2/PIK3R1/SORBS1/SLC1A2/GPC3	22
BP	GO:0030850	prostate gland development	18/3781	45/18723	0.00182707	0.0216724	0.017597	UBE3A/FEM1B/SMARCC1/CTNNB1/FRS2/GLI3/PTEN/ESR1/CDKN1B/AR/FOXA1/SULF1/WNT5A/RARA/FGFR2/TNC/TP63/FGF10	18
BP	GO:1901985	positive regulation of protein acetylation	18/3781	45/18723	0.00182707	0.0216724	0.017597	DDX3X/DIP2B/TAOK1/PAXIP1/GLYR1/SMAD4/CEP295/KAT7/RPS6KA5/ARNTL/TADA2B/FAM161A/BRCA1/ARRB1/SOX4/PRKAA1/GATA3/PRKAA2	18
BP	GO:0006890	retrograde vesicle-mediated transport, Golgi to endoplasmic reticulum	20/3781	52/18723	0.00183855	0.0217667	0.0176736	COPG2/NBAS/RINT1/RAB33B/GBF1/HTT/ATP9A/GOLPH3/COG3/ATP9B/COPB2/ARF3/TMED10/COPA/ERGIC2/ARCN1/SEC22B/GOLPH3L/ERGIC1/RAB6C	20
BP	GO:0006605	protein targeting	85/3781	314/18723	0.00188283	0.0222484	0.0180648	PIK3R4/ERBIN/CHM/ZFYVE16/GCC2/PEX1/HUWE1/AP3B1/AP3M1/AP4E1/PIKFYVE/VPS41/ARL6/C2CD5/SRP72/M6PR/PRKCI/UBE2D3/NPEPPS/NCOA4/TOMM70/VPS13A/VPS13D/TCAF1/LMAN1/EDEM1/NUP54/GRPEL2/VPS13C/SCARB2/ZDHHC21/TRAK1/TIMM10B/NEDD4/PEX12/PEX19/SRP54/YWHAB/VPS37A/YWHAG/ZDHHC20/HSPA4/HSPA8/TOMM20/MON1B/STXBP4/SEC62/TRAK2/GOLGA7/ZFAND6/PEX2/LEPROT/SORT1/LONP2/SRP9/PEX5/GNPTAB/LAMP2/BAG4/TRAM2/SORL1/BNIP3L/TRAM1/ARL6…	85
BP	GO:0000731	DNA synthesis involved in DNA repair	15/3781	35/18723	0.00191971	0.0224269	0.0182097	POLK/SIRT1/PRIMPOL/REV1/POLA1/RCHY1/ZBTB1/WRN/POLI/REV3L/SPRTN/USP10/POLD3/RFC3/DTL	15
BP	GO:0010837	regulation of keratinocyte proliferation	15/3781	35/18723	0.00191971	0.0224269	0.0182097	INTU/NOTCH2/STXBP4/CASK/MED1/YAP1/KLF9/PTPRK/CD109/EPPK1/FGFR2/SLURP1/AREG/TP63/FGF10	15
BP	GO:0033146	regulation of intracellular estrogen receptor signaling pathway	15/3781	35/18723	0.00191971	0.0224269	0.0182097	LATS1/STRN3/KMT2D/CNOT1/UFL1/UFSP2/PARP1/BRCA1/MED1/YAP1/KANK2/AR/FOXA1/SRARP/TP63	15
BP	GO:0040001	establishment of mitotic spindle localization	15/3781	35/18723	0.00191971	0.0224269	0.0182097	CLASP2/FBXW11/UBXN2B/KPNB1/CLASP1/PAFAH1B1/DCTN1/HTT/ITGB1/CDK5RAP2/NDE1/NUMA1/GJA1/MISP/FGF10	15
BP	GO:1905508	protein localization to microtubule organizing center	15/3781	35/18723	0.00191971	0.0224269	0.0182097	APC/NEDD1/UBXN2B/CEP350/GOLGB1/GSK3B/KIAA0753/CEP192/PIBF1/C2CD3/PCM1/BBS4/NUMA1/HOOK3/STIL	15
BP	GO:1905898	positive regulation of response to endoplasmic reticulum stress	15/3781	35/18723	0.00191971	0.0224269	0.0182097	SIRT1/ATF6/UBQLN1/UBQLN2/BCL2L11/SERINC3/TMEM33/NFE2L2/USP13/PTPN1/ERN1/PIK3R1/XBP1/PMAIP1/AGR2	15
BP	GO:0007548	sex differentiation	76/3781	276/18723	0.00194162	0.02264	0.0183827	SMAD5/ATRX/NIPBL/WDR48/SIRT1/PTPN11/UBE3A/KDM5A/ARID4A/TMF1/CRKL/NCOA4/NRIP1/SMAD4/ZFX/WDR19/BCL2L11/RNF38/CTNNA1/RRM1/CTNNB1/FNDC3A/PBX1/ACVR1B/BMPR1A/AGO4/NCOA1/CBL/CSDE1/HSD17B4/SGPL1/MSH2/FOXO3/NUP107/BCL2L2/SIX4/HMGCS1/BCL2/TIPARP/PATZ1/KITLG/STAT5B/PKD1/DACH1/BRCA2/CCND1/ESR1/TGFBR1/GREB1L/RHOBTB3/ARRB1/ARID5B/TBX3/GATA3/PGR/SLIT2/AR/LGR4/BRIP1/INHBA/TLR3/DHCR24/CHD7/LRP2/PDGFRB/WNT5A/CITED…	76
BP	GO:1902905	positive regulation of supramolecular fiber organization	60/3781	209/18723	0.00195676	0.0227735	0.0184911	GMFB/TOGARAM1/WASL/AP1AR/RICTOR/DLG1/MTOR/CLASP1/NCKAP1/ABI2/ARFIP1/AKAP9/FER/SPAST/DCTN1/SLAIN2/TSC1/CKAP5/ABL1/CLIP1/CYFIP1/JMY/WASHC5/MECP2/FMN1/SPIRE1/PSEN1/OCLN/NIN/ACTR2/CDK5RAP2/RB1/ROCK2/SNX9/CARMIL1/WASF2/NUMA1/BAG4/SMAD3/SWAP70/GRB2/PRKCE/CRACD/ARL3/SEMA5A/CDKN1B/TGFBR1/FERMT2/SYNPO2/MAPT/LPAR1/SDC4/IQGAP2/MTSS1/MAP1B/NAV3/TGFB3/EVL/LIMCH1/APOE	60
BP	GO:0006338	chromatin remodeling	71/3781	255/18723	0.00196633	0.0228419	0.0185467	SMARCAD1/ATRX/PBRM1/CHD8/SETD2/SPTY2D1/CTCF/ARID2/ARID1A/SMARCA5/SMARCC2/KDM5A/BAZ2A/BPTF/SUPT16H/ERCC6/INO80/ACTR8/UBN1/TOP1/KDM6A/SMARCC1/RBBP4/MCM3AP/LIN54/SHPRH/HCFC2/BAZ1B/KAT6A/UBN2/ZBTB1/KDM5B/BAZ2B/ARID1B/HCFC1/TSPYL1/HAT1/GATAD2B/DR1/TSPYL4/HP1BP3/RERE/BRD2/TTI1/MYSM1/SMARCA2/SUPT6H/RSF1/KAT6B/ACTR6/CHD3/GATAD1/RB1/TADA2B/ACTL6A/BAZ1A/EZH1/JARID2/MYB/MCM2/CENPP/SMARCA1/ESR1/KDM4B/GATA3/H…	71
BP	GO:0090316	positive regulation of intracellular protein transport	48/3781	160/18723	0.00199813	0.0231678	0.0188112	CTDSPL2/ICE1/UBR5/HUWE1/TPR/GSK3B/KIF5B/C2CD5/XPO4/UBE2D3/NPEPPS/RBM22/MAPK1/MAPK14/MAPK8/CEP290/TCAF1/TMEM30A/TM9SF4/EFCAB7/EDEM1/NMT1/PSEN1/IPO5/PCM1/KIF20B/GLI3/PDCD10/ECT2/LEPROT/MAVS/SORL1/MDM2/SMAD3/TMEM30B/BCAS3/ANK3/PIK3R1/PRKAA1/AKAP5/MTCL1/CDH1/STOM/ZDHHC2/ABLIM3/GZMB/PDZK1/ERBB2	48
BP	GO:0017015	regulation of transforming growth factor beta receptor signaling pathway	40/3781	128/18723	0.00200624	0.023198	0.0188358	RNF111/SIRT1/LATS1/LEMD3/CREBBP/EP300/PDPK1/TRIM33/PPM1A/SMAD4/ADAM17/SMAD2/SNX6/MTMR4/BCL9L/SPRED2/STRAP/SNX25/SKIL/THBS1/PBLD/LDLRAD4/SMAD3/SMURF2/HIPK2/SPRED1/IL17RD/NPNT/SLC2A10/FBN1/ITGA3/CD109/CITED2/TGFB3/DKK3/ZNF703/LOX/TGFBR3/ASPN/PEG10	40
BP	GO:0150063	visual system development	99/3781	375/18723	0.00201783	0.023198	0.0188358	NIPBL/NF1/XRN2/SP3/HIPK1/ATF6/DLG1/OPA1/TTLL5/TOPORS/ABI2/BMPR2/ARHGAP35/PRKCI/TENT2/PHACTR4/KDM5B/CEP290/WDR19/GRHL2/RRM1/CTNNB1/ATP2B1/ACVR2B/PBX1/FRS2/RAB3GAP1/RPGRIP1L/TUG1/TBC1D32/MDM1/PSEN1/SALL2/STAT3/NOTCH2/BBS7/SOS1/USP45/CC2D2A/RAB18/TTC8/SIPA1L3/GLI3/SPRED2/ZHX2/BBS4/TDRD7/ACTL6A/MAN2A1/TULP3/SKIL/TWSG1/MED1/DZANK1/SHROOM2/AHI1/SMAD3/BCL2/IFT140/THRB/ATP2B4/CLIC4/HIPK2/SPRED1/NHS/SLC25…	99
BP	GO:0030509	BMP signaling pathway	46/3781	152/18723	0.00201896	0.023198	0.0188358	SMAD5/CTDSPL2/XIAP/LEMD3/TRIM33/BMPR2/UBE2D3/USP9X/SMAD4/SMAD2/ACVR2B/ABL1/BMPR1A/NOTCH2/ZNF8/SMAD1/HIVEP1/SKIL/ACVR1/TWSG1/NUMA1/NEO1/SORL1/SMAD3/CRIM1/ELAPOR2/PCSK6/SMURF2/HIPK2/SPART/TOB1/HFE/FBN1/SULF1/LRP2/ITGA3/WNT5A/PDCD4/TGFB3/TGFB2/BMP8B/BMPR1B/GREM1/TGFBR3/GPC3/TFAP2B	46
BP	GO:0060993	kidney morphogenesis	31/3781	93/18723	0.00201951	0.023198	0.0188358	DLG1/GZF1/SMAD4/ZMPSTE24/CTNNB1/ASXL1/PBX1/FMN1/GLI3/SIX4/DCHS1/PKD2/AHI1/BCL2/PKD1/ERBB4/NPNT/GREB1L/SOX4/GATA3/LGR4/LAMA5/PDGFRB/GCNT4/WNK4/GCNT1/FGF1/GREM1/GPC3/FGF10/SIX1	31
BP	GO:0097306	cellular response to alcohol	31/3781	93/18723	0.00201951	0.023198	0.0188358	DAG1/CTNNA1/CTNNB1/ATP2B1/LARP1/XRN1/GOLPH3/ADCY6/LRP6/FOXO3/SPIDR/ACACA/BRCA1/PTEN/SLC23A2/HMGCS1/MDM2/TP53INP1/GRAMD1C/PRKCE/ITPR2/ABCA1/ADCY3/PRKAA1/KLF9/PRKAA2/INHBA/CDH1/ADCY1/TNC/ADCY5	31
BP	GO:0072073	kidney epithelium development	42/3781	136/18723	0.00202518	0.0232174	0.0188516	SMAD5/DLG1/GZF1/SMAD4/IQGAP1/SMAD2/CTNNB1/ASXL1/PBX1/FMN1/NOTCH2/SMAD1/GLI3/SIX4/DCHS1/PKD2/CAT/AHI1/SMAD3/BCL2/YAP1/PKD1/KANK2/NPNT/GREB1L/GATA3/SLIT2/PODXL/SDC4/LGR4/LAMA5/LAMB2/MTSS1/RET/WNK4/FGF1/RARA/FGFR2/GREM1/GPC3/SIX1/TFAP2B	42
BP	GO:0030177	positive regulation of Wnt signaling pathway	43/3781	140/18723	0.00202871	0.0232174	0.0188516	USP47/CSNK1G3/USP8/DDX3X/CSNK1G1/XIAP/SPIN1/USP34/UBR5/CDC73/WNK1/TNKS2/ZRANB1/PPM1A/TNKS/MACF1/TTC21B/ABL1/GSKIP/TBL1XR1/DIXDC1/ATP6AP2/ZBED3/ARNTL/NFKB1/TBL1X/SMAD3/SMURF2/YAP1/SEMA5A/LYPD6/SOX4/MLLT3/LGR4/SULF1/WNT3/WNT5A/ADGRA2/ASPM/FGFR2/WLS/GPC3/FGF10	43
BP	GO:0051495	positive regulation of cytoskeleton organization	64/3781	226/18723	0.00204495	0.0233207	0.0189354	GMFB/TOGARAM1/WASL/VPS4B/AP1AR/RICTOR/DLG1/MTOR/CLASP1/NCKAP1/ABI2/ARFIP1/CEP120/AKAP9/DYNC1H1/FER/SPAST/CEP295/DCTN1/SLAIN2/TSC1/CKAP5/ABL1/CLIP1/CYFIP1/JMY/WASHC5/MECP2/FMN1/SPIRE1/OCLN/NIN/ACTR2/CDK5RAP2/ROCK2/SNX9/CARMIL1/WASF2/NUMA1/BAG4/SMAD3/SWAP70/BCAS3/GRB2/PRKCE/CRACD/ARL3/SEMA5A/CDKN1B/TGFBR1/PLK4/FERMT2/SYNPO2/MAPT/LPAR1/SDC4/IQGAP2/MTSS1/MAP1B/TEK/NAV3/TGFB3/EVL/LIMCH1	64
BP	GO:0042594	response to starvation	57/3781	197/18723	0.00205676	0.0233207	0.0189354	PIK3R4/SIRT1/LARS1/PIK3C3/TBC1D5/IMPACT/FNIP1/TNRC6A/MTOR/VPS41/USP33/BMPR2/EIF2AK4/BECN1/MAPK1/MAPK8/GCN1/ATG14/LARP1/WRN/XPR1/CPEB4/MIOS/EIF2S1/SLC38A2/CBL/EIF2AK3/ULK2/ZFYVE1/HSPA8/NFE2L2/FOXO3/RRAGB/EIF2AK2/STK24/RPTOR/LAMP2/ACADM/KLF10/NUAK1/BCL2/BCAS3/PPM1D/GLUL/ELAPOR1/WIPI1/XBP1/PRKAA1/RNF152/PMAIP1/PRKAA2/HFE/STK26/SESN3/SREBF1/PDK4/SSTR2	57
BP	GO:0046700	heterocycle catabolic process	115/3781	445/18723	0.00206583	0.0233207	0.0189354	GIGYF2/DHX9/PUM1/TTC37/PUM2/THRAP3/DCP1A/MTREX/METTL14/SMG1/HNRNPR/CNOT6/CELF1/XRN2/ZC3H14/PHAX/HNRNPU/ROCK1/DHX36/YTHDF3/GSPT1/NBAS/TNRC6A/MTOR/PDE12/ETF1/DCP2/DROSHA/CNOT6L/SMG6/RC3H2/FASTKD2/LRPPRC/TENT2/CNOT1/NCBP1/DIS3/MAPK14/FASTKD3/ANGEL2/SMG7/EXOSC10/TET2/LARP1/PAN2/AGO1/CNOT8/PAN3/METTL16/PAIP1/DICER1/XRN1/ZC3HAV1/FMR1/FXR1/MLH1/RC3H1/PNRC2/SECISBP2/NAF1/SMG8/TDG/TUT7/DIS3L/AGO4/AGO3/EDC…	115
BP	GO:0042733	embryonic digit morphogenesis	21/3781	56/18723	0.00206912	0.0233207	0.0189354	CREBBP/LMBR1/INTU/LNPK/SMAD4/GRHL2/BCL2L11/CTNNB1/BPNT2/TBC1D32/BMPR1A/C2CD3/GLI3/TULP3/MAP3K20/FLVCR1/IFT140/ECE1/TBX3/FZD6/WNT5A	21
BP	GO:0048008	platelet-derived growth factor receptor signaling pathway	21/3781	56/18723	0.00206912	0.0233207	0.0189354	PIK3C2A/PTPN11/HIP1/FER/ABL1/LRIG2/PTPN12/CBL/SGPL1/PTEN/TIPARP/PTPN1/PDGFC/ARID5B/PDGFD/PDGFRB/LRP1/SLC9A3R1/LOX/PLAT/F7	21
BP	GO:0006971	hypotonic response	7/3781	11/18723	0.00207924	0.0233207	0.0189354	OXSR1/CAB39/ITGA2/SLC12A6/STK39/MYLK/AQP5	7
BP	GO:0033148	positive regulation of intracellular estrogen receptor signaling pathway	7/3781	11/18723	0.00207924	0.0233207	0.0189354	KMT2D/PARP1/MED1/YAP1/AR/FOXA1/SRARP	7
BP	GO:0042789	mRNA transcription by RNA polymerase II	7/3781	11/18723	0.00207924	0.0233207	0.0189354	AP3B1/ZBTB1/STAT3/SUPT6H/TFCP2/MED1/SREBF1	7
BP	GO:0045945	positive regulation of transcription by RNA polymerase III	7/3781	11/18723	0.00207924	0.0233207	0.0189354	CHD8/ZNF143/ICE1/ICE2/MTOR/RPTOR/AR	7
BP	GO:0051574	positive regulation of histone H3-K9 methylation	7/3781	11/18723	0.00207924	0.0233207	0.0189354	RIF1/SIRT1/ZNF304/MECP2/BRCA1/JARID2/MYB	7
BP	GO:0090309	positive regulation of DNA methylation-dependent heterochromatin assembly	7/3781	11/18723	0.00207924	0.0233207	0.0189354	TASOR/ZNF304/ATF7IP/SETDB1/MPHOSPH8/RESF1/DNMT1	7
BP	GO:0035335	peptidyl-tyrosine dephosphorylation	32/3781	97/18723	0.00208492	0.023342	0.0189527	PTPN11/MTMR1/PTPN4/MTMR6/EYA3/SSH1/PTPRA/PTPN9/MTM1/PTPN12/RNGTT/MTMR4/PTPDC1/PTPRF/PTPN13/DUSP3/SSH2/PTPRG/PTP4A2/PTEN/PTPN3/PTPN1/CDC14A/PTPRT/PTPN21/PTPRS/PTPN14/PTPRM/SSH3/DNAJC6/PTPRK/DUSP5	32
BP	GO:0031146	SCF-dependent proteasomal ubiquitin-dependent protein catabolic process	19/3781	49/18723	0.00212068	0.0236995	0.019243	FBXW11/FBXO38/CUL5/CUL4B/FBXL17/AMN1/FBXL5/FBXL4/CUL2/CUL4A/BTRC/FBXL3/FBXL14/STYX/SKP1/FBXL2/FBXL20/FBXL7/NCCRP1	19
BP	GO:1905897	regulation of response to endoplasmic reticulum stress	28/3781	82/18723	0.00218067	0.0243259	0.0197516	SIRT1/ATF6/UBQLN1/MBTPS2/OPA1/UBQLN2/UFL1/BCL2L11/PPP1R15B/SERINC3/TMEM33/USP19/LPCAT3/TMBIM6/EIF2AK3/NFE2L2/USP14/USP13/SVIP/USP25/PTPN1/HYOU1/WFS1/ERN1/PIK3R1/XBP1/PMAIP1/AGR2	28
BP	GO:0120034	positive regulation of plasma membrane bounded cell projection assembly	34/3781	105/18723	0.00219195	0.0244076	0.0198179	APC/CCP110/WASL/MTOR/NCKAP1/FNBP1L/ABI2/CEP120/ARHGAP35/ATP7A/CEP135/PIK3CA/HTT/CYFIP1/EPS8/FMR1/SEPTIN7/ATMIN/OCLN/ACTR2/BBS4/AKIRIN1/WASF2/TAPT1/BCAS3/ZMYND8/MNS1/TGFBR1/PIK3R1/ZMYND10/TGFB3/COBL/NEURL1/CCL19	34
BP	GO:0009306	protein secretion	95/3781	359/18723	0.0022711	0.0252247	0.0204814	REST/EXOC1/CLOCK/PTPN11/RAF1/PIK3C3/COPG2/PAFAH1B1/KIF5B/RAB11FIP2/BLOC1S6/OSBP/M6PR/ARFIP1/CD2AP/STXBP3/HMGCR/CCDC186/PPP3CB/SMAD2/SNX19/TMEM167A/SEL1L/PPID/MYH10/DNM1L/CANX/RAB10/GOLPH3/RAB11FIP1/SELENOT/PER2/TMED10/SYTL4/CYB5R4/STXBP4/ARNTL/RAB3D/PCLO/MIA2/GLUD1/TM7SF3/GNPTAB/TVP23B/IRS1/MIA3/CYP51A1/PFKM/SLC12A2/LLGL1/RFX3/UNC13B/GOLPH3L/STXBP5/PRKCE/RAB8B/RAPGEF4/ABCA1/ADAM9/KLF7/MYRIP/GLUL/…	95
BP	GO:0006493	protein O-linked glycosylation	29/3781	86/18723	0.00227757	0.0252247	0.0204814	FKTN/POFUT1/GXYLT1/OGA/TMTC3/TET2/RXYLT1/TRAK1/TMTC2/TRAK2/B3GNT2/TET3/TMTC4/OGT/GALNT1/LARGE1/GALNT7/ST8SIA6/POMK/GALNT10/ST3GAL1/ST6GALNAC2/GCNT4/TMTC1/GALNT6/GCNT1/GXYLT2/GALNT16/GALNT5	29
BP	GO:0009798	axis specification	29/3781	86/18723	0.00227757	0.0252247	0.0204814	TASOR/ARL13B/SMAD4/EPB41L5/SMAD2/BCOR/CTNNB1/FRS2/BMPR1A/C2CD3/NOTCH2/TTC8/RNF2/AHI1/PCSK6/PGAP1/MNS1/TBX3/STIL/CXXC4/WNT3/TDRD5/WNT5A/CITED2/STC1/COBL/WLS/GPC3/FGF10	29
BP	GO:1901990	regulation of mitotic cell cycle phase transition	81/3781	299/18723	0.00231677	0.0256129	0.0207966	GIGYF2/CUL3/USP47/SIN3A/APPL1/CDC23/DDX3X/APC/RAD17/VPS4B/INO80/CDC73/TAOK1/ANKRD17/SDE2/TPR/DLG1/KLHL18/CDC27/RBL2/XPC/ABRAXAS1/KMT2E/WAC/RINT1/CTDSP2/LSM11/TOPBP1/NBN/ADAM17/APPL2/PBX1/PRKDC/PSME3/ECD/TMOD3/BRCC3/WEE1/MECP2/TAOK3/DDB1/MRE11/CUL4A/CDK5RAP2/CTC1/RAB11A/RB1/CTDSPL/RPTOR/ZWILCH/BRCA1/PKD2/PTEN/ATM/ZNF655/KNTC1/MDM2/RFWD3/BCL2/BUB3/RAD21/NEK11/FOXN3/PKD1/KANK2/CCND1/CDC14A/CDKN1B/RB…	81
BP	GO:0030522	intracellular receptor signaling pathway	73/3781	265/18723	0.00232514	0.0256596	0.0208345	PUM1/PUM2/ERBIN/ARID1A/XIAP/CLOCK/SIRT1/UBE3A/ITCH/ASXL2/UBR5/LATS1/ANKRD17/EP300/STRN3/NR2C2/KMT2D/TRAF6/TMF1/CRKL/NCOR1/CNOT1/KDM3A/ARNT/UFL1/NCOA4/DDX17/ASXL1/CRY1/RNF14/NR1D2/RBFOX2/ZMIZ1/UFSP2/FAM120B/RNF6/MAP3K7/STAT3/NCOA1/NEDD4/PTGES3/BIRC2/TRIM24/ARNTL/PARP1/BRCA1/PDK3/MED1/NCOR2/YAP1/CALCOCO1/CTBP2/CRY2/THRB/KANK2/ESR1/NR3C1/TRERF1/DDX60/PGR/AR/FOXA1/EGLN2/CITED2/DDX58/NR2F2/OAS3/RARA/S…	73
BP	GO:0048880	sensory system development	100/3781	381/18723	0.00233637	0.0257376	0.0208978	NIPBL/NF1/XRN2/SP3/HIPK1/ATF6/DLG1/OPA1/TTLL5/TOPORS/ABI2/BMPR2/ARHGAP35/PRKCI/TENT2/PHACTR4/KDM5B/CEP290/WDR19/GRHL2/RRM1/CTNNB1/ATP2B1/ACVR2B/PBX1/FRS2/RAB3GAP1/RPGRIP1L/TUG1/TBC1D32/MDM1/PSEN1/SALL2/STAT3/NOTCH2/BBS7/SOS1/USP45/CC2D2A/RAB18/TTC8/SIPA1L3/GLI3/SPRED2/ZHX2/BBS4/TDRD7/ACTL6A/MAN2A1/TULP3/SKIL/TWSG1/MED1/DZANK1/SHROOM2/AHI1/SMAD3/BCL2/IFT140/THRB/ATP2B4/CLIC4/HIPK2/SPRED1/NHS/SLC25…	100
BP	GO:0090114	COPII-coated vesicle budding	13/3781	29/18723	0.00234075	0.0257399	0.0208997	CUL3/SEC24B/SEC24C/KLHL12/PPP6C/SEC24A/SEC23B/SEC31A/VAPB/TMED10/SEC24D/SEC23A/MIA3	13
BP	GO:0008584	male gonad development	43/3781	141/18723	0.00235849	0.0258614	0.0209983	ATRX/WDR48/KDM5A/ARID4A/TMF1/CRKL/NCOA4/SMAD4/BCL2L11/RNF38/CTNNA1/RRM1/FNDC3A/AGO4/NCOA1/CBL/CSDE1/HSD17B4/SGPL1/MSH2/BCL2L2/SIX4/HMGCS1/BCL2/PATZ1/KITLG/CCND1/ESR1/TGFBR1/RHOBTB3/ARID5B/GATA3/AR/BRIP1/INHBA/TLR3/LRP2/PDGFRB/WNT5A/CITED2/TGFB2/ASPM/RARA	43
BP	GO:0030879	mammary gland development	42/3781	137/18723	0.00236016	0.0258614	0.0209983	CREB1/LATS1/ARHGAP5/ARHGAP35/ATP7A/MAPK1/KDM5B/RREB1/PRLR/BCL2L11/PPAT/NCOA1/BTRC/GLI3/ITGA2/MED1/NCOR2/STAT5B/DDR1/ERBB4/BRCA2/CCND1/ESR1/GPAT4/IRF6/HK2/XBP1/TBX3/GATA3/PGR/AR/WNT3/FASN/WNT5A/TGFB3/FGFR2/IGFBP5/ZNF703/AREG/OXTR/NEURL1/FGF10	42
BP	GO:1990090	cellular response to nerve growth factor stimulus	20/3781	53/18723	0.00240007	0.0262521	0.0213156	CREB1/USP8/UBE3A/KIDINS220/BPTF/ACAP2/PDPK1/DYNC1LI2/CDC5L/RAPGEF2/CRK/CBL/CSTF2/EEF2K/FOXO3/SORT1/PTEN/MAPT/NTRK2/LCN2	20
BP	GO:0014020	primary neural tube formation	31/3781	94/18723	0.00244002	0.0266212	0.0216153	SEC24B/SETD2/HECTD1/OPA1/TRAF6/ARHGAP35/PHACTR4/MED12/GRHL2/TSC1/ABL1/SHROOM3/SUFU/BRD2/LUZP1/CC2D2A/KIF20B/BBS4/TULP3/CELSR1/FZD3/SDC4/FZD6/STIL/LRP2/WNT5A/CITED2/TGFB2/RARA/COBL/PRKACB	31
BP	GO:0048701	embryonic cranial skeleton morphogenesis	18/3781	46/18723	0.00244243	0.0266212	0.0216153	NIPBL/SETD2/WDR19/MED12/GRHL2/SMAD2/GLI3/NDST1/TULP3/SIX4/SMAD3/IFT140/TGFBR1/MMP16/TFAP2A/TGFB3/FGFR2/SIX1	18
BP	GO:0035592	establishment of protein localization to extracellular region	95/3781	360/18723	0.00248441	0.0270113	0.021932	REST/EXOC1/CLOCK/PTPN11/RAF1/PIK3C3/COPG2/PAFAH1B1/KIF5B/RAB11FIP2/BLOC1S6/OSBP/M6PR/ARFIP1/CD2AP/STXBP3/HMGCR/CCDC186/PPP3CB/SMAD2/SNX19/TMEM167A/SEL1L/PPID/MYH10/DNM1L/CANX/RAB10/GOLPH3/RAB11FIP1/SELENOT/PER2/TMED10/SYTL4/CYB5R4/STXBP4/ARNTL/RAB3D/PCLO/MIA2/GLUD1/TM7SF3/GNPTAB/TVP23B/IRS1/MIA3/CYP51A1/PFKM/SLC12A2/LLGL1/RFX3/UNC13B/GOLPH3L/STXBP5/PRKCE/RAB8B/RAPGEF4/ABCA1/ADAM9/KLF7/MYRIP/GLUL/…	95
BP	GO:0001885	endothelial cell development	23/3781	64/18723	0.00248696	0.0270113	0.021932	ROCK1/VEZF1/MARVELD2/ADD1/RAPGEF2/TJP1/ZDHHC21/RAP1B/ROCK2/VCL/AFDN/IKBKB/RAP2C/ARHGEF26/CLIC4/MYADM/RDX/HEG1/S1PR3/PTPRS/FASN/STC1/GSTM3	23
BP	GO:0060828	regulation of canonical Wnt signaling pathway	70/3781	253/18723	0.00250293	0.027137	0.0220341	USP47/CHD8/CSNK1G3/CSNK1A1/USP8/DDX3X/APC/CSNK1G1/XIAP/USP34/UBR5/LATS1/SCYL2/KPNA1/WNK1/TNKS2/GSK3B/PPM1A/TNKS/MAPK14/G3BP1/TTC21B/GSKIP/PSEN1/TBL1XR1/BTRC/ATP6AP2/ZBED3/GLI3/ARNTL/FOXO3/GNAQ/STK4/NFKB1/ZNRF3/TLE3/TBL1X/TMEM170B/SMAD3/STK3/CDK14/SMURF2/TPBG/YAP1/MCC/SEMA5A/AMFR/SOX13/LYPD6/SIAH2/CCDC88C/AXIN2/SOX4/MLLT3/LGR4/FZD6/CTNND2/WNT5A/ADGRA2/ASPM/DKK3/APOE/FGFR2/SLC9A3R1/WLS/ZNF703/GREM1…	70
BP	GO:0006517	protein deglycosylation	12/3781	26/18723	0.0025357	0.0273962	0.0222446	MARCHF6/OGA/MAN1A2/EDEM3/UGGT1/EDEM1/UGGT2/RNF139/MAN2A1/MAN2A2/AMFR/MAN1A1	12
BP	GO:0033598	mammary gland epithelial cell proliferation	12/3781	26/18723	0.0025357	0.0273962	0.0222446	MAPK1/KDM5B/RREB1/BTRC/MED1/BRCA2/CCND1/ESR1/GATA3/WNT5A/ZNF703/AREG	12
BP	GO:0042921	glucocorticoid receptor signaling pathway	8/3781	14/18723	0.00254825	0.0274359	0.0222768	ARID1A/CLOCK/CRY1/NEDD4/PTGES3/ARNTL/CRY2/NR3C1	8
BP	GO:1902036	regulation of hematopoietic stem cell differentiation	8/3781	14/18723	0.00254825	0.0274359	0.0222768	ITCH/ABL1/PRKDC/HSPA9/NFE2L2/EIF2AK2/N4BP2L2/PUS7	8
BP	GO:0000280	nuclear division	113/3781	439/18723	0.00258424	0.027775	0.0225521	CUL3/ATRX/STAG2/NIPBL/TOP2B/PDS5A/CDC23/APC/CLASP2/CEP97/HNRNPU/TOGARAM1/ERCC4/UBXN2B/MARF1/VPS4B/PDS5B/KIF3B/MSH3/INO80/SLF2/KPNB1/ANAPC1/PHIP/FANCM/TPR/KIF2A/FOXJ3/STAG1/CDC27/CENPC/CLASP1/PRMT5/SMC3/ABRAXAS1/UBR2/MLH3/CDK13/ABRAXAS2/FOXJ2/TNKS/BECN1/PRKAR1A/CEP192/USP16/CHAMP1/SPAST/BCL2L11/SLF1/SMC1A/NME6/SMC5/SMC2/RMI1/CHMP2B/RAD1/SLX4/NSL1/EPS8/POGZ/MLH1/WASHC5/SPIRE1/TERF1/TOM1L1/MRE11/AGO…	113
BP	GO:0043112	receptor metabolic process	49/3781	166/18723	0.00261066	0.0278747	0.0226331	PIK3R4/ALS2/ITCH/TBC1D5/MKLN1/USP46/ARFGEF2/AP1AR/LMTK2/SCYL2/ATXN2/UBQLN2/BECN1/AP2B1/FMR1/EPS15/ITGB1/ATAD1/PSEN1/LMBRD1/OPHN1/NEDD4/NSF/KIF16B/SNX25/SNX1/CLTC/ZNRF3/SORL1/AHI1/INPP5F/GRB2/MYLIP/FUT8/DTX3L/INSR/PTPN1/TFRC/TBC1D16/GRK3/ABCA2/ARRB1/ECE1/RAB31/CALCRL/LRP1/APOE/GREM1/CACNG4	49
BP	GO:0006906	vesicle fusion	34/3781	106/18723	0.00261156	0.0278747	0.0226331	TGFBRAP1/ANKFY1/SPG11/GOSR1/VPS8/PIKFYVE/VPS41/KIF5B/C2CD5/EEA1/VPS39/STX17/SNAP23/CHMP3/ARL8B/CHMP2B/YIPF5/USO1/STX12/VAMP4/SNAP29/PIP4K2B/SEPTIN8/SEC22B/VAV3/CPLANE2/RAB8B/STXBP1/TBC1D4/SYT7/SAMD9/SYT9/SYT1/SYT13	34
BP	GO:0030038	contractile actin filament bundle assembly	34/3781	106/18723	0.00261156	0.0278747	0.0226331	CUL3/CLASP2/ROCK1/ALMS1/MTOR/CLASP1/PAK2/TSC1/ABL1/TJP1/TNFAIP1/TTC8/ROCK2/CARMIL1/WASF2/PPFIA1/BAG4/PPP1R9A/SMAD3/FHDC1/TGFBR1/PHLDB2/ARRB1/PIK3R1/RHPN2/FERMT2/LPAR1/SORBS1/SDC4/ITGB5/CGNL1/TGFB3/EVL/LIMCH1	34
BP	GO:0043149	stress fiber assembly	34/3781	106/18723	0.00261156	0.0278747	0.0226331	CUL3/CLASP2/ROCK1/ALMS1/MTOR/CLASP1/PAK2/TSC1/ABL1/TJP1/TNFAIP1/TTC8/ROCK2/CARMIL1/WASF2/PPFIA1/BAG4/PPP1R9A/SMAD3/FHDC1/TGFBR1/PHLDB2/ARRB1/PIK3R1/RHPN2/FERMT2/LPAR1/SORBS1/SDC4/ITGB5/CGNL1/TGFB3/EVL/LIMCH1	34
BP	GO:0006611	protein export from nucleus	21/3781	57/18723	0.00266181	0.0283621	0.0230288	CTDSPL2/PTPN11/XPO1/UHMK1/TPR/GSK3B/XPO4/RBM22/AHCYL1/DNAJC27/HSPA9/DUSP16/STYX/NUP42/XPO7/BARD1/MDM2/CSE1L/PKD1/PTPN14/RANBP3L	21
BP	GO:0032401	establishment of melanosome localization	11/3781	23/18723	0.0026942	0.0286085	0.0232289	ARL6/BLOC1S6/BBS2/BBS7/RAB11A/BBS4/RAB27B/MYO5A/SHROOM2/MREG/MLPH	11
BP	GO:0045724	positive regulation of cilium assembly	11/3781	23/18723	0.0026942	0.0286085	0.0232289	CCP110/CEP120/ARHGAP35/CEP135/HTT/SEPTIN7/ATMIN/BBS4/TAPT1/MNS1/ZMYND10	11
BP	GO:0061008	hepaticobiliary system development	45/3781	150/18723	0.00270522	0.0286763	0.0232839	CUL3/NIPBL/NF1/SP3/ATF2/WDR35/PTCD2/PRMT5/SRSF1/ATP7A/ZMPSTE24/PHF2/RB1CC1/PIK3CA/RPGRIP1L/GNPNAT1/KRAS/NOTCH2/GLI3/UPF2/IGF2R/ITGA2/MAN2A1/PKD2/ACADM/PTPN3/MED1/HMGCS1/SMAD3/JARID2/PKD1/CCND1/CPT1A/DDX39B/XBP1/ARID5B/E2F7/HFE/CITED2/FGF1/RARA/COBL/QDPR/TGFBR3/HPN	45
BP	GO:0046546	development of primary male sexual characteristics	43/3781	142/18723	0.00273369	0.0289285	0.0234887	ATRX/WDR48/KDM5A/ARID4A/TMF1/CRKL/NCOA4/SMAD4/BCL2L11/RNF38/CTNNA1/RRM1/FNDC3A/AGO4/NCOA1/CBL/CSDE1/HSD17B4/SGPL1/MSH2/BCL2L2/SIX4/HMGCS1/BCL2/PATZ1/KITLG/CCND1/ESR1/TGFBR1/RHOBTB3/ARID5B/GATA3/AR/BRIP1/INHBA/TLR3/LRP2/PDGFRB/WNT5A/CITED2/TGFB2/ASPM/RARA	43
BP	GO:0006474	N-terminal protein amino acid acetylation	9/3781	17/18723	0.00275689	0.0291241	0.0236475	NAA35/NAA30/CREBBP/EP300/NAA25/NAA15/NAA16/NAA50/SOX4	9
BP	GO:0046931	pore complex assembly	10/3781	20/18723	0.00278374	0.0293045	0.023794	NUP98/NUP153/ADAM10/ANO6/AHCTF1/PLEKHA7/NUP205/NDC1/NUP107/AFDN	10
BP	GO:0071214	cellular response to abiotic stimulus	88/3781	331/18723	0.00278819	0.0293045	0.023794	TAF1/REST/USP47/NIPBL/TP53BP1/DDX3X/CLOCK/POLK/SIRT1/PTPN11/ERCC4/DHX36/INO80/CREBBP/IMPACT/SDE2/MAP3K2/XRCC5/EP300/CUL4B/XPC/ATR/DAG1/OXSR1/EIF2AK4/RHBDD1/TENT2/MTPN/ZBTB1/ZMPSTE24/MAPK14/MAPK8/CASP8AP2/PIK3CA/CRY1/PPID/RAD1/FMR1/WRN/NMT1/NUCKS1/CAB39/DDB1/EIF2S1/SLC38A2/NEDD4/LIG4/ADSS2/MAP3K1/ECT2/INTS7/ATP1A1/ITGA2/SPIDR/MAP3K20/USP28/MAP2K4/PARP1/NFKB1/TLK2/FIGNL1/PKD2/PTEN/ATM/SLC12A6/MDM2/…	88
BP	GO:0104004	cellular response to environmental stimulus	88/3781	331/18723	0.00278819	0.0293045	0.023794	TAF1/REST/USP47/NIPBL/TP53BP1/DDX3X/CLOCK/POLK/SIRT1/PTPN11/ERCC4/DHX36/INO80/CREBBP/IMPACT/SDE2/MAP3K2/XRCC5/EP300/CUL4B/XPC/ATR/DAG1/OXSR1/EIF2AK4/RHBDD1/TENT2/MTPN/ZBTB1/ZMPSTE24/MAPK14/MAPK8/CASP8AP2/PIK3CA/CRY1/PPID/RAD1/FMR1/WRN/NMT1/NUCKS1/CAB39/DDB1/EIF2S1/SLC38A2/NEDD4/LIG4/ADSS2/MAP3K1/ECT2/INTS7/ATP1A1/ITGA2/SPIDR/MAP3K20/USP28/MAP2K4/PARP1/NFKB1/TLK2/FIGNL1/PKD2/PTEN/ATM/SLC12A6/MDM2/…	88
BP	GO:0001736	establishment of planar polarity	25/3781	72/18723	0.00283932	0.0296402	0.0240666	SEC24B/EXOC5/PAFAH1B1/INTU/MED12/ABL1/RPGRIP1L/RYK/DAAM1/TTC8/VANGL1/ZNRF3/CELSR1/CELSR2/SMURF2/ERBB4/ASTN2/FZD3/MLLT3/FZD6/TIAM1/WNT5A/GPC4/GPC3/TP63	25
BP	GO:0007164	establishment of tissue polarity	25/3781	72/18723	0.00283932	0.0296402	0.0240666	SEC24B/EXOC5/PAFAH1B1/INTU/MED12/ABL1/RPGRIP1L/RYK/DAAM1/TTC8/VANGL1/ZNRF3/CELSR1/CELSR2/SMURF2/ERBB4/ASTN2/FZD3/MLLT3/FZD6/TIAM1/WNT5A/GPC4/GPC3/TP63	25
BP	GO:0030032	lamellipodium assembly	25/3781	72/18723	0.00283932	0.0296402	0.0240666	TWF1/MTOR/NCKAP1/ABI2/FER/ATP7A/PIK3CA/CYFIP1/ITGB1/GOLPH3/OCLN/ACTR2/AKIRIN1/CARMIL1/WASF2/SPATA13/VCL/VAV2/VAV3/CDH13/ARHGEF6/PIK3R1/SLIT2/ABLIM1/ABLIM3	25
BP	GO:0033627	cell adhesion mediated by integrin	25/3781	72/18723	0.00283932	0.0296402	0.0240666	PTPN11/WNK1/CRKL/ACER2/ADAM17/ITGB1/CRK/PTK2/ITGAV/ITGA2/IFT74/SWAP70/JAM3/ADAM9/NPNT/PODXL/FBN1/ITGB5/RET/ITGBL1/TGFB2/FYB2/CCL5/ITGA11/CXCL13	25
BP	GO:0001657	ureteric bud development	30/3781	91/18723	0.00285667	0.029771	0.0241728	SMAD5/DLG1/GZF1/SMAD4/SMAD2/CTNNB1/PBX1/FMN1/SMAD1/GLI3/SIX4/DCHS1/PKD2/CAT/SMAD3/BCL2/NPNT/GREB1L/GATA3/SLIT2/SDC4/LGR4/LAMA5/RET/FGF1/RARA/FGFR2/GREM1/GPC3/SIX1	30
BP	GO:0071426	ribonucleoprotein complex export from nucleus	26/3781	76/18723	0.00299018	0.0311099	0.0252599	YTHDC1/SETD2/SMG1/NUP133/XPO1/THOC2/TPR/NOP9/MCM3AP/SMG6/NUP160/NCBP1/NUP155/FYTTD1/SMG7/NMD3/TSC1/GLE1/LSG1/SDAD1/ABCE1/SUPT6H/UPF2/NUP107/XPOT/DDX39B	26
BP	GO:1903050	regulation of proteolysis involved in cellular protein catabolic process	62/3781	221/18723	0.00301382	0.0312729	0.0253923	TAF1/CSNK1A1/HECTD1/UBE3A/ZYG11B/SOCS4/LATS1/MARCHF7/XPO1/ANKIB1/UBQLN1/TMTC3/USP7/UBE2K/GSK3B/SMARCC1/RYBP/TMF1/ARIH1/UBQLN2/RCHY1/WAC/PIAS1/FBXW8/RAD23B/UFL1/BAG5/RNF14/PSME3/FMR1/USP19/SOCS5/PSEN1/SUFU/OPHN1/BTRC/RNF40/BBS7/MAPK9/STYX/PTK2/NFE2L2/USP14/RNF139/PSMC1/OGT/USP13/TLK2/PTEN/SVIP/USP25/MDM2/GCLC/RNF19A/ALAD/UBQLN4/PKD1/HIPK2/MAP1A/HFE/PLK2/APOE	62
BP	GO:0071539	protein localization to centrosome	14/3781	33/18723	0.00302102	0.0312729	0.0253923	APC/NEDD1/UBXN2B/CEP350/GOLGB1/GSK3B/KIAA0753/CEP192/PIBF1/C2CD3/PCM1/BBS4/HOOK3/STIL	14
BP	GO:0150117	positive regulation of cell-substrate junction organization	14/3781	33/18723	0.00302102	0.0312729	0.0253923	PTPN11/ROCK1/EPB41L5/IQGAP1/TSC1/ABL1/FMN1/IQSEC1/DUSP3/SMAD3/PIK3R1/FERMT2/SDC4/TEK	14
BP	GO:0001763	morphogenesis of a branching structure	56/3781	196/18723	0.00303038	0.0313173	0.0254283	SETD2/FEM1B/BTBD7/DLG1/DAG1/GZF1/SMAD4/DLG5/KDM5B/GRHL2/CTNNB1/ABL1/PBX1/FRS2/KRAS/RERE/BTRC/GLI3/STK4/ACVR1/SIX4/DCHS1/PKD2/CELSR1/MED1/SEMA3C/BCL2/GRB2/YAP1/PKD1/CLIC4/DDR1/EDNRA/ESR1/NPNT/GREB1L/TBX3/PGR/SLIT2/AR/LGR4/FOXA1/LAMA5/SULF1/WNT5A/NTN4/FGF1/FGFR2/GREM1/TNC/AREG/SEMA3E/GPC3/TP63/FGF10/SIX1	56
BP	GO:0048754	branching morphogenesis of an epithelial tube	45/3781	151/18723	0.00311358	0.0321235	0.0260829	DLG1/DAG1/GZF1/SMAD4/DLG5/KDM5B/CTNNB1/ABL1/PBX1/KRAS/BTRC/GLI3/STK4/ACVR1/SIX4/DCHS1/PKD2/CELSR1/MED1/BCL2/YAP1/PKD1/CLIC4/DDR1/EDNRA/ESR1/NPNT/GREB1L/TBX3/PGR/SLIT2/AR/LGR4/FOXA1/LAMA5/WNT5A/FGF1/FGFR2/GREM1/TNC/AREG/SEMA3E/GPC3/FGF10/SIX1	45
BP	GO:0048524	positive regulation of viral process	23/3781	65/18723	0.00312497	0.0321872	0.0261346	DHX9/TOP2B/DDX3X/PKN2/SRPK2/KPNA6/PDE12/CHMP3/LARP1/HACD3/CHMP2B/PPID/FMR1/ADAR/TSG101/DDB1/STAU1/RSF1/VAPB/CNOT7/TOP2A/STOM/CCL5	23
BP	GO:0001889	liver development	44/3781	147/18723	0.00313835	0.0322541	0.026189	CUL3/NF1/SP3/ATF2/WDR35/PTCD2/PRMT5/SRSF1/ATP7A/ZMPSTE24/PHF2/RB1CC1/PIK3CA/RPGRIP1L/GNPNAT1/KRAS/NOTCH2/GLI3/UPF2/IGF2R/ITGA2/MAN2A1/PKD2/ACADM/PTPN3/MED1/HMGCS1/SMAD3/JARID2/PKD1/CCND1/CPT1A/DDX39B/XBP1/ARID5B/E2F7/HFE/CITED2/FGF1/RARA/COBL/QDPR/TGFBR3/HPN	44
BP	GO:0008064	regulation of actin polymerization or depolymerization	54/3781	188/18723	0.00314191	0.0322541	0.026189	GMFB/WASL/LATS1/TWF1/AP1AR/RICTOR/DLG1/MTOR/ARFGEF1/NCKAP1/CAPZA2/RASA1/ABI2/ARFIP1/ARHGAP35/MTPN/FER/SSH1/PIK3CA/ADD1/CYFIP1/EPS8/TMOD3/JMY/WASHC5/SPTAN1/FMN1/SPIRE1/ACTR2/LIMA1/SPTBN1/SNX9/CARMIL1/WASF2/SSH2/BAG4/PPP1R9A/SWAP70/GRB2/PRKCE/CRACD/SEMA5A/PREX1/SVIL/MYADM/RDX/SLIT2/TMSB10/FHOD3/SSH3/IQGAP2/CYFIP2/ADD3/EVL	54
BP	GO:1903844	regulation of cellular response to transforming growth factor beta stimulus	40/3781	131/18723	0.003195	0.0327036	0.0265539	RNF111/SIRT1/LATS1/LEMD3/CREBBP/EP300/PDPK1/TRIM33/PPM1A/SMAD4/ADAM17/SMAD2/SNX6/MTMR4/BCL9L/SPRED2/STRAP/SNX25/SKIL/THBS1/PBLD/LDLRAD4/SMAD3/SMURF2/HIPK2/SPRED1/IL17RD/NPNT/SLC2A10/FBN1/ITGA3/CD109/CITED2/TGFB3/DKK3/ZNF703/LOX/TGFBR3/ASPN/PEG10	40
BP	GO:0030048	actin filament-based movement	39/3781	127/18723	0.00319627	0.0327036	0.0265539	WASL/MYO6/DLG1/FNBP1L/ATP2A2/AKAP9/NUP155/EPB41L5/PIK3CA/MYH10/MYO5C/MYO5B/SHTN1/WIPF2/DSG2/SYNE2/ATP1A1/WASF2/PARVA/NOS1AP/MYO5A/GPD1L/MYO1D/NEDD4L/CACNA1D/PKP2/MYO1B/CACNA2D1/DSP/CCDC88C/GJA1/EMP2/KCND3/STC1/LIMCH1/EPDR1/MYH14/KCNJ3/KCNE4	39
BP	GO:0031111	negative regulation of microtubule polymerization or depolymerization	16/3781	40/18723	0.00322007	0.0327485	0.0265904	APC/CLASP2/TAOK1/CLASP1/CAMSAP1/DYRK1A/TTBK2/CAMSAP2/ATXN7/HDGFL3/CKAP2/FKBP4/MAP1B/INPP5J/NAV3/BMERB1	16
BP	GO:0060412	ventricular septum morphogenesis	16/3781	40/18723	0.00322007	0.0327485	0.0265904	BMPR2/SMAD4/BMPR1A/NSD2/SAV1/ACVR1/TGFBR1/SOX4/TBX3/SLIT2/WNT5A/CITED2/TGFB2/SLIT3/FGFR2/TGFBR3	16
BP	GO:0047496	vesicle transport along microtubule	18/3781	47/18723	0.00322186	0.0327485	0.0265904	FBXW11/KIF3B/AP3B1/AP3M1/KIF3A/PAFAH1B1/KIF5B/BLOC1S6/DYNC1H1/HTT/FYCO1/KIF13A/KIFAP3/TRAK1/NDE1/TRAK2/AP3M2/SYBU	18
BP	GO:0051972	regulation of telomerase activity	18/3781	47/18723	0.00322186	0.0327485	0.0265904	POT1/XRCC5/SMG6/TNKS/MAPK1/GRHL2/CTNNB1/NEK7/NAF1/TERF1/PTGES3/MAP3K4/PARP4/CCT2/NVL/HSP90AA1/GREM1/PKIB	18
BP	GO:0007015	actin filament organization	113/3781	442/18723	0.00327535	0.0332376	0.0269875	CUL3/CLASP2/GMFB/WASL/LATS1/ROCK1/MYO6/TWF1/AP1AR/ALMS1/RICTOR/DLG1/MTOR/TTC17/CLASP1/ARFGEF1/NCKAP1/CAPZA2/HIP1/RASA1/ABI2/ARFIP1/ARHGAP35/PRKCI/MTPN/PAK2/CD2AP/FER/TSC1/CTNNA1/SSH1/PIK3CA/ABL1/ADD1/CYFIP1/EPS8/TMOD3/SHROOM3/JMY/MYO5C/WASHC5/SPTAN1/ARHGAP12/FMN1/SPIRE1/MYO5B/TJP1/ACTR2/SHTN1/TNFAIP1/LIMA1/TTC8/ZBED3/PAWR/RHOBTB1/ROCK2/SPTBN1/SNX9/CARMIL1/WASF2/NEBL/SSH2/PLS1/MYO5A/ENAH/PPFIA1/BA…	113
BP	GO:0010232	vascular transport	29/3781	88/18723	0.00334582	0.033897	0.0275229	SLC44A1/SLC38A2/SLC5A3/SLC38A1/SLC12A2/SLC22A5/SLC6A6/ABCC1/INSR/ATP2B4/TFRC/SLC7A1/SLC2A13/ABCA2/ABCC5/SLC1A4/SLC2A10/LEPR/SLC4A8/GJA1/SLC7A2/SLC1A2/LRP2/SLC16A2/SLC7A8/LRP1/APOE/SLC9A3R1/SLC1A1	29
BP	GO:0015931	nucleobase-containing compound transport	62/3781	222/18723	0.00337325	0.0341189	0.0277031	DHX9/YTHDC1/SETD2/SMG1/NUP98/CPSF6/EPG5/PHAX/NUP58/SLC25A24/NUP133/XPO1/THOC2/G3BP2/SENP2/TPR/RANBP2/SLC35A5/ATXN2/MCM3AP/SMG6/POM121/NUP160/LRPPRC/SLC25A36/SRSF1/TNKS/NCBP1/NUP153/NUP155/FYTTD1/SLC35D1/SMG7/TSC1/CKAP5/SLC35A3/NCBP3/FMR1/AHCTF1/GLE1/NUP54/NUP188/NUP50/NUP205/SUPT6H/NDC1/TOMM20/PARP11/NUP42/UPF2/NUP107/CASC3/NUP210/XPOT/NXT2/SLC25A25/ABCC5/DDX39B/SIDT1/KIF5C/GJA1/ABCC11	62
BP	GO:0071692	protein localization to extracellular region	96/3781	368/18723	0.00341772	0.0345122	0.0280224	REST/EXOC1/CLOCK/PTPN11/RAF1/PIK3C3/COPG2/PAFAH1B1/KIF5B/RAB11FIP2/BLOC1S6/OSBP/M6PR/ARFIP1/CD2AP/STXBP3/HMGCR/CCDC186/PPP3CB/SMAD2/SNX19/TMEM167A/SEL1L/PPID/MYH10/DNM1L/CANX/RAB10/GOLPH3/RAB11FIP1/SELENOT/PER2/TMED10/SYTL4/CYB5R4/STXBP4/ARNTL/RAB3D/PCLO/MIA2/GLUD1/TM7SF3/GNPTAB/TVP23B/IRS1/MIA3/CYP51A1/PFKM/SLC12A2/LLGL1/RFX3/UNC13B/GOLPH3L/STXBP5/PRKCE/RAB8B/RAPGEF4/ABCA1/ADAM9/KLF7/MYRIP/GLUL/…	96
BP	GO:0031058	positive regulation of histone modification	30/3781	92/18723	0.00343432	0.0345669	0.0280669	NIPBL/CTR9/RIF1/SIRT1/RNF20/PAXIP1/ZNF304/KMT2E/RTF1/C6orf89/GLYR1/SMAD4/CTNNB1/KMT2A/FMR1/MECP2/KAT7/RNF40/PAXBP1/RPS6KA5/TADA2B/OGT/NSD3/BRCA1/JARID2/DNMT1/MYB/ARRB1/GATA3/SREBF1	30
BP	GO:1903312	negative regulation of mRNA metabolic process	30/3781	92/18723	0.00343432	0.0345669	0.0280669	CCNT1/DHX9/HNRNPK/THRAP3/SRSF10/CTR9/ZC3H14/RNF20/HNRNPU/NBAS/MTOR/DYRK1A/MAPK14/ANGEL2/LARP1/METTL16/PAIP1/FMR1/SECISBP2/RNF40/SYNCRIP/TIRAP/TENT4B/BARD1/BAG4/NOCT/AXIN2/TOB1/TRAF5/RBM24	30
BP	GO:0030832	regulation of actin filament length	54/3781	189/18723	0.00355075	0.0356807	0.0289712	GMFB/WASL/LATS1/TWF1/AP1AR/RICTOR/DLG1/MTOR/ARFGEF1/NCKAP1/CAPZA2/RASA1/ABI2/ARFIP1/ARHGAP35/MTPN/FER/SSH1/PIK3CA/ADD1/CYFIP1/EPS8/TMOD3/JMY/WASHC5/SPTAN1/FMN1/SPIRE1/ACTR2/LIMA1/SPTBN1/SNX9/CARMIL1/WASF2/SSH2/BAG4/PPP1R9A/SWAP70/GRB2/PRKCE/CRACD/SEMA5A/PREX1/SVIL/MYADM/RDX/SLIT2/TMSB10/FHOD3/SSH3/IQGAP2/CYFIP2/ADD3/EVL	54
BP	GO:0060840	artery development	32/3781	100/18723	0.00357117	0.0357932	0.0290625	SEC24B/NF1/ARID2/HECTD1/BMPR2/AP2B1/DCTN5/ACVR2B/ZMIZ1/BMPR1A/SUFU/LUZP1/GLI3/NDST1/PKD2/CNTRL/TGFBR1/SOX4/SLC2A10/ADGRF5/CHD7/LRP2/PDGFRB/LDLR/CITED2/MYLK/LRP1/TGFB2/APOE/LOX/SIX1/TFAP2B	32
BP	GO:0045860	positive regulation of protein kinase activity	100/3781	386/18723	0.00357352	0.0357932	0.0290625	CCNT1/ALS2/ADNP/DDX3X/SIRT1/ERCC6/TAOK1/ZFP91/WNK1/RICTOR/XRCC5/DLG1/PDPK1/MTOR/TRAF6/DAG1/PRRC1/ETAA1/CCNT2/BMPR2/PAK2/ADAM17/PRLR/IQGAP1/PIK3CA/ABL1/CACUL1/CCNK/MADD/RAPGEF2/CAB39/BMPR1A/DAZAP2/KRAS/MAP3K7/PSEN1/TAOK3/TOM1L1/PIBF1/AKAP13/OSBPL8/MAP3K4/PTK2/TAB2/TIRAP/PDCD10/ECT2/SNX9/STK4/RPTOR/PKD2/ERBB3/THBS1/PPP1R9A/STK3/KITLG/HSP90AA1/INSR/ATP2B4/PKD1/PTPN1/ADAM9/CCND1/CAB39L/PDGFC/INCENP/C…	100
BP	GO:0051293	establishment of spindle localization	19/3781	51/18723	0.00360713	0.0360713	0.0292883	CLASP2/FBXW11/UBXN2B/KPNB1/CLASP1/PAFAH1B1/DYNC1H1/DCTN1/HTT/ITGB1/SPIRE1/CDK5RAP2/NDE1/ZBED3/NUMA1/LLGL1/GJA1/MISP/FGF10	19
BP	GO:1903076	regulation of protein localization to plasma membrane	33/3781	104/18723	0.00362126	0.0361541	0.0293556	APPL1/HECTD1/CNST/DLG1/PDPK1/KIF5B/RAB11FIP2/PRKCI/PTPN9/ATP2C1/ITGB1/LYPLA1/GOPC/RAB11A/SPTBN1/ACSL3/PLS1/CLTC/PPFIA1/PRKCE/ATP2B4/PPP2R5A/PIK3R1/SORBS1/AKAP5/AR/KCNJ11/ITGA3/ZDHHC2/LRP1/EPHA3/AGR2/LRRC15	33
BP	GO:0007492	endoderm development	26/3781	77/18723	0.00366206	0.0364069	0.0295608	SETD2/CTR9/BPTF/CDC73/RTF1/SMAD4/EPB41L5/MED12/SMAD2/CTNNB1/BMPR1A/KIF16B/ITGAV/LEO1/SMAD3/LAMC1/LAMA3/COL12A1/ITGB5/INHBA/FN1/COL5A2/COL8A1/DUSP5/DUSP4/COL11A1	26
BP	GO:0071166	ribonucleoprotein complex localization	26/3781	77/18723	0.00366206	0.0364069	0.0295608	YTHDC1/SETD2/SMG1/NUP133/XPO1/THOC2/TPR/NOP9/MCM3AP/SMG6/NUP160/NCBP1/NUP155/FYTTD1/SMG7/NMD3/TSC1/GLE1/LSG1/SDAD1/ABCE1/SUPT6H/UPF2/NUP107/XPOT/DDX39B	26
BP	GO:0000184	nuclear-transcribed mRNA catabolic process, nonsense-mediated decay	15/3781	37/18723	0.00368193	0.0364069	0.0295608	DCP1A/SMG1/GSPT1/NBAS/ETF1/DCP2/SMG6/NCBP1/SMG7/EXOSC10/PNRC2/SECISBP2/SMG8/UPF2/CASC3	15
BP	GO:0048846	axon extension involved in axon guidance	15/3781	37/18723	0.00368193	0.0364069	0.0295608	BMPR2/RYK/SEMA4F/SEMA3C/SEMA5A/SEMA3F/ALCAM/SLIT2/SEMA4B/WNT3/SEMA6D/WNT5A/SLIT3/SEMA3E/SEMA3B	15
BP	GO:0051567	histone H3-K9 methylation	15/3781	37/18723	0.00368193	0.0364069	0.0295608	ATRX/ASH1L/RIF1/SIRT1/ARID4A/SETD5/ZNF304/SETDB1/KDM3A/SETD7/MECP2/BRCA1/JARID2/DNMT1/MYB	15
BP	GO:1902284	neuron projection extension involved in neuron projection guidance	15/3781	37/18723	0.00368193	0.0364069	0.0295608	BMPR2/RYK/SEMA4F/SEMA3C/SEMA5A/SEMA3F/ALCAM/SLIT2/SEMA4B/WNT3/SEMA6D/WNT5A/SLIT3/SEMA3E/SEMA3B	15
BP	GO:0018107	peptidyl-threonine phosphorylation	36/3781	116/18723	0.0037085	0.0366111	0.0297266	TAF1/DCAF1/HIPK1/CDC42BPB/ROCK1/LMTK2/WNK1/UBE2K/PDPK1/MTOR/GSK3B/OXSR1/TNKS/DYRK1A/HIPK3/MAPK1/MAPK8/TBK1/PRKDC/PPP2R5D/ACVR1B/CAB39/NLK/SPRED2/ROCK2/ACVR1/RPTOR/TSSK4/BCL2/STK39/CDC42BPA/HIPK2/SPRED1/TGFBR1/WNT5A/STOX1	36
BP	GO:0007528	neuromuscular junction development	17/3781	44/18723	0.00372708	0.0367358	0.0298279	ALS2/CRKL/DCTN1/PPFIBP1/NEDD4/AFG3L2/SIX4/UNC13B/GPHN/ANK3/COL4A5/F2R/LAMB2/TNC/ERBB2/DOK7/SIX1	17
BP	GO:0003401	axis elongation	12/3781	27/18723	0.00373449	0.0367502	0.0298396	MED12/SIX4/MED1/YAP1/ESR1/WNT5A/FGF1/FGFR2/TNC/AREG/FGF10/SIX1	12
BP	GO:0006303	double-strand break repair via nonhomologous end joining	23/3781	66/18723	0.00389515	0.0382367	0.0310466	TP53BP1/RIF1/ERCC4/ERCC6/POT1/XRCC5/POLA1/DCLRE1A/KMT5B/SHLD2/PRKDC/MLH1/SMCHD1/LIG3/TFIP11/MRE11/KDM2A/LIG4/NSD2/ATM/DTX3L/DEK/PARP9	23
BP	GO:0090068	positive regulation of cell cycle process	65/3781	236/18723	0.00390374	0.0382367	0.0310466	CUL3/ATRX/SIN3A/CDC23/DDX3X/PKN2/HNRNPU/UBXN2B/VPS4B/KIF3B/INO80/SLF2/CDC73/ANKRD17/PHIP/TPR/KLHL18/CDC27/KMT2E/CEP120/DYNC1H1/BECN1/SPAST/LSM11/CEP295/ADAM17/SLF1/CHMP3/SMC5/PBX1/PKP4/TMOD3/USP19/MECP2/CUL4A/KIF20B/ECT2/STXBP4/RAB11A/RB1/ROCK2/MAP3K20/NUDT16/NUMA1/RPTOR/MED1/MDM2/ATAD5/RAD21/INSR/PRKCE/RACGAP1/CCND1/SVIL/CDC14A/DDX39B/RDX/PLK4/E2F7/DTL/PDGFRB/WNT5A/STOX1/HSPA2/FGF10	65
BP	GO:0032092	positive regulation of protein binding	28/3781	85/18723	0.00392044	0.0382367	0.0310466	TAF1/EP300/GSK3B/USP33/EPB41/EPB41L5/NMD3/ABL1/IDE/ADD1/RAPGEF2/PSEN1/STK4/STK3/NVL/PPP2CB/DTX3L/PKD1/HIPK2/AMFR/HFE/TIAM1/PLK2/WNT5A/PLCL1/LRP1/APOE/SPON1	28
BP	GO:0045069	regulation of viral genome replication	28/3781	85/18723	0.00392044	0.0382367	0.0310466	TASOR/TOP2B/DDX3X/PKN2/SRPK2/PDE12/SETDB1/LARP1/HACD3/PPID/ZC3HAV1/ADAR/MPHOSPH8/DDB1/STAU1/RNASEL/VAPB/EIF2AK2/RESF1/MAVS/CNOT7/BCL2/FAM111A/TOP2A/OAS3/SLPI/CCL5/ISG15	28
BP	GO:0072384	organelle transport along microtubule	28/3781	85/18723	0.00392044	0.0382367	0.0310466	FBXW11/COPG2/KIF3B/AP3B1/AP3M1/KIF3A/OPA1/PAFAH1B1/KIF5B/RHOT1/BLOC1S6/LRPPRC/DYNC1H1/SPAST/HTT/FYCO1/KIF13A/KIFAP3/TRAK1/NDE1/TRAK2/ARMCX3/AP3M2/MREG/ARHGAP21/MAPT/SYBU/MAP1B	28
BP	GO:0071772	response to BMP	48/3781	165/18723	0.00392885	0.0382367	0.0310466	SMAD5/CTDSPL2/XIAP/LEMD3/TRIM33/BMPR2/UBE2D3/USP9X/SMAD4/SMAD2/ACVR2B/ABL1/BMPR1A/NOTCH2/ZNF8/SMAD1/HIVEP1/SKIL/ACVR1/TWSG1/NUMA1/NEO1/SORL1/SMAD3/CRIM1/ELAPOR2/PCSK6/SMURF2/HIPK2/SPART/GATA3/TOB1/ADAMTS12/HFE/FBN1/SULF1/LRP2/ITGA3/WNT5A/PDCD4/TGFB3/TGFB2/BMP8B/BMPR1B/GREM1/TGFBR3/GPC3/TFAP2B	48
BP	GO:0071773	cellular response to BMP stimulus	48/3781	165/18723	0.00392885	0.0382367	0.0310466	SMAD5/CTDSPL2/XIAP/LEMD3/TRIM33/BMPR2/UBE2D3/USP9X/SMAD4/SMAD2/ACVR2B/ABL1/BMPR1A/NOTCH2/ZNF8/SMAD1/HIVEP1/SKIL/ACVR1/TWSG1/NUMA1/NEO1/SORL1/SMAD3/CRIM1/ELAPOR2/PCSK6/SMURF2/HIPK2/SPART/GATA3/TOB1/ADAMTS12/HFE/FBN1/SULF1/LRP2/ITGA3/WNT5A/PDCD4/TGFB3/TGFB2/BMP8B/BMPR1B/GREM1/TGFBR3/GPC3/TFAP2B	48
BP	GO:0044262	cellular carbohydrate metabolic process	76/3781	283/18723	0.00393563	0.0382425	0.0310512	PPIP5K2/SIRT1/EP300/USP7/MTOR/GSK3B/ARPP19/RANBP2/NCOA2/PPP4R3B/NCOR1/OCRL/SOGA1/IPPK/ZMPSTE24/RB1CC1/BRAF/CRY1/RPE/SYNJ1/BPNT2/MECP2/SCARB2/DDB1/PHKA2/STAT3/NLN/EPM2AIP1/PTGES3/PER2/CSGALNACT2/HS2ST1/SYNJ2/INPP5B/PHKA1/GPD2/GK5/AGL/IL6ST/PPP1R2/NDST1/SLC5A3/B3GNT2/PHKB/OGT/HK1/GNPTAB/INPP4B/ACADM/COX11/PTEN/IMPA1/IRS1/PDK3/BPNT1/PFKM/GBE1/PPIP5K1/INSR/PDK2/PRKCE/ENPP1/POMK/HK2/PFKFB3/LEPR/SORBS1…	76
BP	GO:0003205	cardiac chamber development	47/3781	161/18723	0.0039858	0.0386086	0.0313485	HECTD1/MAML1/TRIP11/ZBTB14/PTCD2/BMPR2/SMAD4/ZMPSTE24/GRHL2/AP2B1/DCTN5/FRS2/BMPR1A/SUFU/NOTCH2/LUZP1/SOS1/NSD2/NDST1/SAV1/PARVA/ACVR1/CNTRL/MED1/SEMA3C/MDM2/MDM4/PKP2/DSP/TGFBR1/GREB1L/SOX4/HEG1/TBX3/GATA3/SLIT2/CHD7/LRP2/WNT5A/CITED2/TEK/TGFB2/SLIT3/FGFR2/CPE/TGFBR3/COL11A1	47
BP	GO:0061572	actin filament bundle organization	47/3781	161/18723	0.0039858	0.0386086	0.0313485	CUL3/CLASP2/ROCK1/ALMS1/MTOR/CLASP1/PAK2/TSC1/ABL1/ADD1/EPS8/SPIRE1/TJP1/SHTN1/TNFAIP1/LIMA1/TTC8/PAWR/ROCK2/CARMIL1/WASF2/PLS1/PPFIA1/BAG4/PPP1R9A/SMAD3/SWAP70/FHDC1/MYO1B/TGFBR1/PHLDB2/RDX/ARRB1/PIK3R1/RHPN2/FERMT2/SYNPO2/LPAR1/SORBS1/SDC4/ITGB5/CGNL1/MTSS1/CALD1/TGFB3/EVL/LIMCH1	47
BP	GO:0043010	camera-type eye development	85/3781	322/18723	0.00400333	0.0387176	0.0314371	NF1/XRN2/SP3/HIPK1/DLG1/OPA1/TTLL5/TOPORS/ABI2/BMPR2/ARHGAP35/TENT2/PHACTR4/KDM5B/CEP290/WDR19/GRHL2/RRM1/CTNNB1/ATP2B1/ACVR2B/FRS2/RAB3GAP1/RPGRIP1L/TBC1D32/MDM1/PSEN1/NOTCH2/SOS1/USP45/CC2D2A/TTC8/GLI3/SPRED2/ZHX2/BBS4/TDRD7/ACTL6A/MAN2A1/TULP3/SKIL/TWSG1/MED1/SHROOM2/AHI1/SMAD3/IFT140/THRB/ATP2B4/CLIC4/HIPK2/SPRED1/NHS/SLC25A25/CDKN1B/TGFBR1/TFAP2A/GATA3/CRYBG3/BCAR3/FBN1/PTPRM/LAMB2/INHBA/TUB…	85
BP	GO:0051017	actin filament bundle assembly	46/3781	157/18723	0.00404015	0.0390127	0.0316766	CUL3/CLASP2/ROCK1/ALMS1/MTOR/CLASP1/PAK2/TSC1/ABL1/ADD1/EPS8/SPIRE1/TJP1/TNFAIP1/LIMA1/TTC8/PAWR/ROCK2/CARMIL1/WASF2/PLS1/PPFIA1/BAG4/PPP1R9A/SMAD3/SWAP70/FHDC1/MYO1B/TGFBR1/PHLDB2/RDX/ARRB1/PIK3R1/RHPN2/FERMT2/SYNPO2/LPAR1/SORBS1/SDC4/ITGB5/CGNL1/MTSS1/CALD1/TGFB3/EVL/LIMCH1	46
BP	GO:0003181	atrioventricular valve morphogenesis	11/3781	24/18723	0.00407535	0.0390475	0.0317049	BMPR2/SMAD4/BMPR1A/ACVR1/DCHS1/MDM2/MDM4/SOX4/TGFB2/SLIT3/OLFM1	11
BP	GO:0038095	Fc-epsilon receptor signaling pathway	11/3781	24/18723	0.00407535	0.0390475	0.0317049	TRAF6/FER/MAPK8/MAP3K7/SOS1/MAPK9/MAP3K1/MAP2K4/VAV2/IKBKB/VAV3	11
BP	GO:0051570	regulation of histone H3-K9 methylation	11/3781	24/18723	0.00407535	0.0390475	0.0317049	ATRX/RIF1/SIRT1/ZNF304/KDM3A/SETD7/MECP2/BRCA1/JARID2/DNMT1/MYB	11
BP	GO:0051905	establishment of pigment granule localization	11/3781	24/18723	0.00407535	0.0390475	0.0317049	ARL6/BLOC1S6/BBS2/BBS7/RAB11A/BBS4/RAB27B/MYO5A/SHROOM2/MREG/MLPH	11
BP	GO:0060479	lung cell differentiation	11/3781	24/18723	0.00407535	0.0390475	0.0317049	CREB1/GRHL2/CTNNB1/SAV1/YAP1/THRB/FOXA1/AGR2/ASCL1/FGF10/SPDEF	11
BP	GO:0034086	maintenance of sister chromatid cohesion	7/3781	12/18723	0.00412217	0.0391321	0.0317736	ATRX/NIPBL/SLF2/TNKS/SLF1/SMC5/RB1	7
BP	GO:0034088	maintenance of mitotic sister chromatid cohesion	7/3781	12/18723	0.00412217	0.0391321	0.0317736	ATRX/NIPBL/SLF2/TNKS/SLF1/SMC5/RB1	7
BP	GO:0034333	adherens junction assembly	7/3781	12/18723	0.00412217	0.0391321	0.0317736	HIPK1/PAK2/DLG5/CTNNB1/VCL/JAM3/ZNF703	7
BP	GO:0060601	lateral sprouting from an epithelium	7/3781	12/18723	0.00412217	0.0391321	0.0317736	CELSR1/AR/SULF1/WNT5A/FGFR2/TP63/FGF10	7
BP	GO:0060831	smoothened signaling pathway involved in dorsal/ventral neural tube patterning	7/3781	12/18723	0.00412217	0.0391321	0.0317736	WDR19/TBC1D32/SUFU/GLI3/TULP3/GORAB/PRKACB	7
BP	GO:1903441	protein localization to ciliary membrane	7/3781	12/18723	0.00412217	0.0391321	0.0317736	ARL13B/RABEP1/WDR19/EFCAB7/LZTFL1/ARL3/TUB	7
BP	GO:0043524	negative regulation of neuron apoptotic process	43/3781	145/18723	0.00418351	0.0396535	0.0321969	ADNP/PDPK1/RASA1/PRKCI/OXR1/PIK3CA/SNX6/MECP2/KRAS/PSEN1/CPEB4/LIG4/NMNAT1/MSH2/MAP2K4/SIX4/ERBB3/SYNGAP1/GCLC/BCL2/GBE1/GCLM/PPT1/HIPK2/HYOU1/WFS1/ARRB1/F2R/UNC5B/RETREG1/STXBP1/TOX3/TGFB3/LRP1/CX3CR1/APOE/NR4A2/BTG2/NTRK2/EN1/SLC1A1/SIX1/TFAP2B	43
BP	GO:0048854	brain morphogenesis	14/3781	34/18723	0.0041938	0.039659	0.0322014	NF1/FBXW11/PAFAH1B1/BBS2/PSEN1/SOS1/BBS4/FOXO3/PTEN/SPEF2/FZD3/FZD6/WNT5A/SLC6A4	14
BP	GO:0061647	histone H3-K9 modification	18/3781	48/18723	0.00419693	0.039659	0.0322014	ATRX/ASH1L/RIF1/SIRT1/ARID4A/SETD5/ZNF304/SETDB1/KDM3A/SMAD4/KMT2A/SETD7/MECP2/BRCA1/JARID2/DNMT1/MYB/GATA3	18
BP	GO:0030968	endoplasmic reticulum unfolded protein response	25/3781	74/18723	0.00429425	0.0403934	0.0327977	ATF6/QRICH1/MBTPS2/EP300/UFL1/BCL2L11/PPP1R15B/TMEM33/EIF2S1/ERLEC1/MBTPS1/EIF2AK3/VAPB/NFE2L2/ERMP1/EIF2AK2/TMTC4/PTPN1/AMFR/WFS1/CCND1/ERN1/PIK3R1/XBP1/AGR2	25
BP	GO:0033143	regulation of intracellular steroid hormone receptor signaling pathway	25/3781	74/18723	0.00429425	0.0403934	0.0327977	CLOCK/SIRT1/LATS1/EP300/STRN3/KMT2D/NCOR1/CNOT1/UFL1/CRY1/RNF14/UFSP2/RNF6/ARNTL/PARP1/BRCA1/MED1/NCOR2/YAP1/CRY2/KANK2/AR/FOXA1/SRARP/TP63	25
BP	GO:0046323	glucose import	25/3781	74/18723	0.00429425	0.0403934	0.0327977	APPL1/PTPN11/ARPP19/PRKCI/STXBP3/MAPK14/TSC1/APPL2/OCLN/OSBPL8/RNASEL/CREBL2/MEF2A/NFE2L2/SORT1/ADIPOR2/IRS1/INSR/ENPP1/HK2/PIK3R1/SLC2A10/SORBS1/SLC1A2/GPC3	25
BP	GO:0060612	adipose tissue development	16/3781	41/18723	0.00430534	0.0404362	0.0328325	ATF2/SIRT1/PAXIP1/PIK3CA/FTO/SPTLC2/SORL1/PGRMC2/ZNF516/SPART/SLC25A25/KLF7/ARRDC3/SH3PXD2B/XBP1/ARID5B	16
BP	GO:0018210	peptidyl-threonine modification	38/3781	125/18723	0.00432633	0.0405291	0.0329079	TAF1/DCAF1/HIPK1/CDC42BPB/ROCK1/LMTK2/WNK1/UBE2K/PDPK1/MTOR/GSK3B/OXSR1/TNKS/DYRK1A/HIPK3/MAPK1/MAPK8/TBK1/PRKDC/PPP2R5D/ACVR1B/CAB39/NLK/SPRED2/ROCK2/ACVR1/RPTOR/GALNT1/TSSK4/BCL2/STK39/CDC42BPA/HIPK2/SPRED1/TGFBR1/WNT5A/STOX1/GALNT16	38
BP	GO:0001704	formation of primary germ layer	37/3781	121/18723	0.0043349	0.0405291	0.0329079	SETD2/CTR9/CDC73/EXOC4/RTF1/BMPR2/PRKAR1A/EPB41L5/SMAD2/CTNNB1/ITGB1/BMPR1A/KIF16B/SMAD1/ITGAV/ITGA2/LEO1/ACVR1/TWSG1/SMAD3/TXNRD1/LAMA3/GJA1/COL12A1/ITGB5/INHBA/WNT3/ITGA3/WNT5A/FN1/COL5A2/FGFR2/COL8A1/WLS/DUSP5/DUSP4/COL11A1	37
BP	GO:0045931	positive regulation of mitotic cell cycle	37/3781	121/18723	0.0043349	0.0405291	0.0329079	CUL3/SIN3A/CDC23/DDX3X/PKN2/PTPN11/VPS4B/ANKRD17/KLHL18/CDC27/PAFAH1B1/KMT2E/USP22/EIF4E/LSM11/ADAM17/ABL1/PBX1/TMOD3/MECP2/CUL4A/DYNLT3/RAB11A/RB1/DUSP3/RPTOR/MDM2/RPS6KB1/STAT5B/BRCA2/CCND1/RDX/FOXA1/DTL/STOX1/HSPA2/FGF10	37
BP	GO:0006353	DNA-templated transcription, termination	10/3781	21/18723	0.0043613	0.0406528	0.0330084	DHX9/SCAF8/XRN2/PRMT5/SETX/POLR2A/ZMPSTE24/PCF11/TTF2/MAZ	10
BP	GO:0019985	translesion synthesis	10/3781	21/18723	0.0043613	0.0406528	0.0330084	POLK/PRIMPOL/REV1/RCHY1/ZBTB1/POLI/REV3L/SPRTN/USP10/DTL	10
BP	GO:0010452	histone H3-K36 methylation	8/3781	15/18723	0.00449916	0.0415044	0.0336998	SETD2/ASH1L/NSD1/PAXIP1/SETD5/BCOR/NSD2/NSD3	8
BP	GO:0031958	corticosteroid receptor signaling pathway	8/3781	15/18723	0.00449916	0.0415044	0.0336998	ARID1A/CLOCK/CRY1/NEDD4/PTGES3/ARNTL/CRY2/NR3C1	8
BP	GO:0045176	apical protein localization	8/3781	15/18723	0.00449916	0.0415044	0.0336998	DLG5/SHROOM3/ATP8B1/GOPC/CELSR1/SHROOM2/JAM3/RDX	8
BP	GO:0070831	basement membrane assembly	8/3781	15/18723	0.00449916	0.0415044	0.0336998	CLASP2/CLASP1/DAG1/PHLDB1/PHLDB2/PXDN/LAMB2/NTN4	8
BP	GO:0090110	COPII-coated vesicle cargo loading	8/3781	15/18723	0.00449916	0.0415044	0.0336998	SEC24B/SEC24C/SEC24A/SEC23B/SEC31A/SEC24D/SEC23A/MIA3	8
BP	GO:0110156	methylguanosine-cap decapping	8/3781	15/18723	0.00449916	0.0415044	0.0336998	DCP1A/DCP2/PNRC2/EDC4/NUDT12/CNOT7/PATL1/NOCT	8
BP	GO:1901214	regulation of neuron death	84/3781	319/18723	0.00451158	0.0415044	0.0336998	CREB1/REST/LANCL1/ADNP/NF1/ATF2/SIRT1/SRPK2/BTBD10/PDPK1/MTOR/GSK3B/RASA1/PRKCI/BCL2L11/AP2B1/TSC1/OXR1/SSH1/PIK3CA/SNX6/CTNNB1/TBK1/ABL1/REL/MECP2/KRAS/PSEN1/CPEB4/STAT3/EIF2S1/CBL/LIG4/NMNAT1/MSH2/FOXO3/PSMC1/VPS35/MAP2K4/PARP1/SIX4/BACE1/ERBB3/SLC23A2/SORL1/SYNGAP1/GCLC/BCL2/GBE1/GCLM/MYB/PPT1/HIPK2/HYOU1/WFS1/ARRB1/F2R/UNC5B/TFAP2A/RETREG1/GATA3/STXBP1/MAPT/TOX3/DHCR24/EGLN2/WNT5A/GHR/TGFB3/L…	84
BP	GO:0043523	regulation of neuron apoptotic process	59/3781	212/18723	0.00451873	0.0415044	0.0336998	LANCL1/ADNP/NF1/ATF2/SRPK2/PDPK1/RASA1/PRKCI/BCL2L11/OXR1/PIK3CA/SNX6/CTNNB1/MECP2/KRAS/PSEN1/CPEB4/LIG4/NMNAT1/MSH2/FOXO3/MAP2K4/PARP1/SIX4/BACE1/ERBB3/SYNGAP1/GCLC/BCL2/GBE1/GCLM/MYB/PPT1/HIPK2/HYOU1/WFS1/ARRB1/F2R/UNC5B/TFAP2A/RETREG1/GATA3/STXBP1/TOX3/EGLN2/TGFB3/LRP1/TGFB2/CX3CR1/APOE/NR4A2/BTG2/NTRK2/LCN2/EN1/ASCL1/SLC1A1/SIX1/TFAP2B	59
BP	GO:0036507	protein demannosylation	9/3781	18/18723	0.00453325	0.0415044	0.0336998	MARCHF6/MAN1A2/EDEM3/UGGT1/EDEM1/UGGT2/RNF139/AMFR/MAN1A1	9
BP	GO:0036508	protein alpha-1,2-demannosylation	9/3781	18/18723	0.00453325	0.0415044	0.0336998	MARCHF6/MAN1A2/EDEM3/UGGT1/EDEM1/UGGT2/RNF139/AMFR/MAN1A1	9
BP	GO:0099558	maintenance of synapse structure	9/3781	18/18723	0.00453325	0.0415044	0.0336998	DLG1/ERC1/DCTN1/OPHN1/PCLO/SYNGAP1/CTBP2/CHCHD10/CBLN2	9
BP	GO:0110154	RNA decapping	9/3781	18/18723	0.00453325	0.0415044	0.0336998	DCP1A/DCP2/PNRC2/EDC4/NUDT12/CNOT7/NUDT16/PATL1/NOCT	9
BP	GO:0006301	postreplication repair	13/3781	31/18723	0.00475269	0.043385	0.0352267	POLK/PRIMPOL/REV1/RCHY1/ZBTB1/POLI/RAD18/REV3L/SPRTN/USP10/MSH2/BRCA1/DTL	13
BP	GO:0016577	histone demethylation	13/3781	31/18723	0.00475269	0.043385	0.0352267	KDM3B/KDM5A/KDM6A/KDM3A/KDM5B/PHF2/PHF8/KDM1B/JMJD1C/KDM2A/JARID2/KDM7A/KDM4B	13
BP	GO:0048813	dendrite morphogenesis	43/3781	146/18723	0.00479394	0.043697	0.0354801	CAPRIN1/UBE3A/KIDINS220/WASL/DHX36/OPA1/GSK3B/PAFAH1B1/TMEM106B/ABI2/FBXW8/ADAM10/RBFOX2/SLC11A2/RAB21/RAPGEF2/ITGB1/DNM1L/TRAK1/RERE/ACTR2/NEDD4/EEF2K/MEF2A/TRAK2/FARP1/CDKL5/PTEN/PPP1R9A/CELSR2/TANC2/NEDD4L/TPBG/PDLIM5/BTBD3/KLF7/PPP3CA/DCLK1/TIAM1/CTNND2/TNIK/DCDC2/SRCIN1	43
BP	GO:0034644	cellular response to UV	29/3781	90/18723	0.00481106	0.0437885	0.0355544	TAF1/USP47/POLK/SIRT1/ERCC4/DHX36/INO80/CREBBP/IMPACT/SDE2/EP300/CUL4B/XPC/ATR/EIF2AK4/RHBDD1/ZBTB1/PPID/FMR1/DDB1/EIF2S1/NEDD4/USP28/PARP1/MDM2/POLD3/TP53INP1/PIK3R1/PTPRK	29
BP	GO:0071902	positive regulation of protein serine/threonine kinase activity	56/3781	200/18723	0.00484323	0.0440019	0.0357277	CCNT1/ALS2/DDX3X/SIRT1/TAOK1/RICTOR/TRAF6/ETAA1/CCNT2/BMPR2/ADAM17/IQGAP1/CCNK/RAPGEF2/CAB39/BMPR1A/DAZAP2/KRAS/MAP3K7/PSEN1/TAOK3/AKAP13/MAP3K4/PDCD10/STK4/RPTOR/PKD2/THBS1/STK3/KITLG/INSR/ATP2B4/PKD1/PTPN1/ADAM9/CCND1/CAB39L/PDGFC/INCENP/CDKN1B/SASH1/ERN1/FERMT2/PDGFD/TIAM1/FGFR1/PDGFRB/WNT5A/GHR/FGF1/BMPR1B/NEK10/TCIM/FLT3/ERBB2/CCL19	56
BP	GO:0072006	nephron development	42/3781	142/18723	0.00484876	0.0440019	0.0357277	NUP133/DLG1/NUP160/GZF1/SMAD4/IQGAP1/CTNNB1/ASXL1/PBX1/FMN1/NOTCH2/GLI3/NUP107/SIX4/DCHS1/PKD2/AHI1/BCL2/YAP1/PKD1/ERBB4/NID1/NPNT/GREB1L/GATA3/PODXL/LGR4/LAMA5/PDGFD/SULF1/LAMB2/MTSS1/PDGFRB/ITGA3/TEK/RET/WNK4/FGF1/GREM1/GPC3/SIX1/TFAP2B	42
BP	GO:0019080	viral gene expression	30/3781	94/18723	0.00488993	0.0442456	0.0359255	CCNT1/DHX9/REST/SP1/TRIM32/EP300/GSK3B/CCNT2/EIF3A/EIF2AK4/CHD1/DENR/UBP1/CANX/NUCKS1/MID2/CSDE1/RSF1/EIF3L/MON1B/MGAT5/MAN2A1/GALNT1/FUT8/MGAT4A/ST3GAL1/ST6GALNAC2/PARP9/CCL5/HPN	30
BP	GO:1902414	protein localization to cell junction	30/3781	94/18723	0.00488993	0.0442456	0.0359255	KIF3A/DLG1/KIF5B/DAG1/PAK2/DLG5/ADAM10/TJP1/LAMTOR3/JAK1/MAPK9/RAB11A/PCLO/RAB27B/ABHD17B/VCL/ADAM22/JAM3/MPP7/DSP/MAP1A/HEG1/KIF5C/FERMT2/GRIP1/MAPT/CGNL1/WNT5A/ZDHHC2/GPC4	30
BP	GO:1903322	positive regulation of protein modification by small protein conjugation or removal	41/3781	138/18723	0.00489864	0.0442596	0.0359369	CUL3/RNF111/CTR9/DDX3X/XIAP/WDR48/RNF20/UBE3A/MARCHF7/UBQLN1/HUWE1/SENP2/FANCM/PAXIP1/TOPORS/TRAF6/RCHY1/PIAS1/DCUN1D1/ARNT/DCUN1D4/CRY1/PIAS3/SPRTN/NDFIP1/BTRC/RNF40/BIRC2/MAPK9/NDFIP2/UBA2/SKP1/BRCA1/MYCBP2/PTEN/FANCI/WFS1/BMI1/ARRDC3/ARRB1/ARRDC4	41
BP	GO:0031667	response to nutrient levels	119/3781	474/18723	0.00491685	0.0443593	0.0360179	PIK3R4/SIRT1/LARS1/PIK3C3/APAF1/TBC1D5/IMPACT/FNIP1/TNRC6A/OPA1/MTOR/VPS41/SETDB1/USP33/BMPR2/EIF2AK4/TNKS/BECN1/HMGCR/MAPK1/MAPK8/GCN1/ATG14/TSC1/ATP2B1/LARP1/APPL2/HAT1/BCKDHB/WRN/XPR1/BBS2/DNM1L/CPEB4/MIOS/EIF2S1/OMA1/NCOA1/SLC38A2/CBL/EIF2AK3/ULK2/ZFYVE1/HLCS/HSPA8/NFE2L2/TRIM24/AGL/BBS4/FOXO3/NNT/RRAGB/EIF2AK2/ITGA2/STK24/ACSL3/OGT/RPTOR/LAMP2/TMEM135/ACADM/ADIPOR2/PTEN/MED1/KLF10/HMGCS1/SOR…	119
BP	GO:0032434	regulation of proteasomal ubiquitin-dependent protein catabolic process	40/3781	134/18723	0.00494293	0.0445296	0.0361561	TAF1/CSNK1A1/HECTD1/ZYG11B/SOCS4/XPO1/ANKIB1/UBQLN1/USP7/UBE2K/GSK3B/SMARCC1/RYBP/ARIH1/UBQLN2/RCHY1/WAC/PIAS1/FBXW8/RAD23B/UFL1/BAG5/RNF14/SOCS5/PSEN1/BBS7/MAPK9/STYX/NFE2L2/USP14/OGT/TLK2/SVIP/MDM2/GCLC/RNF19A/UBQLN4/MAP1A/HFE/PLK2	40
BP	GO:0010332	response to gamma radiation	20/3781	56/18723	0.00501084	0.0450102	0.0365463	ERCC6/XRCC5/ATR/ZMPSTE24/PRKDC/WRN/CBL/LIG4/MAP3K20/PARP1/TLK2/ATM/MDM2/BCL2/YAP1/BRCA2/FANCD2/PRKAA1/GATA3/CYBA	20
BP	GO:1990089	response to nerve growth factor	20/3781	56/18723	0.00501084	0.0450102	0.0365463	CREB1/USP8/UBE3A/KIDINS220/BPTF/ACAP2/PDPK1/DYNC1LI2/CDC5L/RAPGEF2/CRK/CBL/CSTF2/EEF2K/FOXO3/SORT1/PTEN/MAPT/NTRK2/LCN2	20
BP	GO:0090263	positive regulation of canonical Wnt signaling pathway	33/3781	106/18723	0.00502895	0.0451073	0.0366252	USP47/CSNK1G3/USP8/DDX3X/CSNK1G1/XIAP/USP34/UBR5/WNK1/TNKS2/PPM1A/TNKS/TTC21B/GSKIP/TBL1XR1/ATP6AP2/ZBED3/ARNTL/NFKB1/TBL1X/SMAD3/SMURF2/YAP1/SEMA5A/LYPD6/SOX4/LGR4/ADGRA2/ASPM/FGFR2/WLS/GPC3/FGF10	33
BP	GO:0050767	regulation of neurogenesis	94/3781	364/18723	0.00508179	0.0455152	0.0369564	REST/ADNP/NF1/CAPRIN1/DIP2B/DHX36/TRIM32/EIF4G2/XRCC5/OPA1/MTOR/PAFAH1B1/PRMT5/DAG1/BMPR2/SPEN/PRKCI/FBXW8/UFL1/GOLGA4/MACF1/CTNNA1/CTNNB1/APPL2/CERS2/SYNJ1/DICER1/CYFIP1/RAB21/RAPGEF2/DNM1L/RYK/RNF6/BMPR1A/PSEN1/TRAK1/NIN/ACTR2/DOCK7/SHTN1/PRUNE1/LIG4/PER2/EEF2K/PCM1/ULK2/GLI3/RAB11A/IL6ST/ARNTL/NPTN/TRAK2/MAN2A1/SKIL/SEMA4F/CDKL5/PTEN/SEMA3C/SORL1/HOOK3/SYNGAP1/MYB/YAP1/SEMA5A/SPART/AMIGO1/BHLH…	94
BP	GO:0061025	membrane fusion	47/3781	163/18723	0.00515096	0.0460679	0.0374051	TGFBRAP1/ANKFY1/UBXN2B/SPG11/GOSR1/VPS8/HUWE1/PIKFYVE/VPS41/KIF5B/C2CD5/BLOC1S6/EEA1/MFN1/VPS39/STX17/RABEP1/SNAP23/CHMP3/ARL8B/CHMP2B/YIPF5/USO1/DNM1L/STX12/HACE1/VCPIP1/NAPG/VAMP4/SNAP29/NSF/MYOF/PIP4K2B/SEPTIN8/SEC22B/VAV3/CPLANE2/RAB8B/SPATA46/STXBP1/TBC1D4/SYT7/SAMD9/SYT9/SERPINA5/SYT1/SYT13	47
BP	GO:1902369	negative regulation of RNA catabolic process	25/3781	75/18723	0.00522856	0.0466943	0.0379138	DHX9/THRAP3/PHAX/HNRNPU/DHX36/NBAS/MTOR/LRPPRC/TENT2/MAPK14/ANGEL2/LARP1/METTL16/PAIP1/FMR1/SECISBP2/NAF1/SYNCRIP/TIRAP/TENT4B/NOCT/AXIN2/TOB1/TRAF5/RBM24	25
BP	GO:0032200	telomere organization	46/3781	159/18723	0.00523719	0.0467039	0.0379216	ATRX/RFC1/YLPM1/SMG1/RIF1/HNRNPU/ERCC4/DHX36/POT1/TNKS2/XRCC5/USP7/ATR/DCP2/SMG6/TNKS/DCLRE1A/MAPK1/NBN/SMC5/EXOSC10/CTNNB1/PRKDC/SLX4/XRN1/NEK7/WRN/NAF1/TFIP11/TERF1/RPA1/MRE11/GNL3L/PTGES3/MAP3K4/CTC1/TENT4B/PARP1/ATM/CCT2/HSP90AA1/CCNE2/BRCA2/DNA2/H4-16/PKIB	46
BP	GO:0001667	ameboidal-type cell migration	119/3781	475/18723	0.00528081	0.0470251	0.0381823	PIK3C2A/SP1/APPL1/NF1/CAPN7/CLASP2/PKN2/SIRT1/PTPN11/ROCK1/YTHDF3/PDPK1/PAXIP1/MTOR/CLASP1/PAFAH1B1/BMPR2/FER/PHACTR4/RREB1/EPB41L5/MACF1/ADAM17/PIK3CA/PIK3CB/APPL2/SYNJ2BP/ABL1/ITGB1/MECP2/ACVR1B/RFFL/PIP5K1A/IQSEC1/PTK2/DOCK1/NFE2L2/SGPL1/PDCD10/RAB11A/MACIR/ROCK2/ITGA2/WASF2/LGALS8/ACVR1/SEMA4F/PTPRG/ADIPOR2/PTEN/BAG4/MIA3/SEMA3C/THBS1/STARD13/BCAS3/PATZ1/KITLG/SMURF2/TPBG/MCC/RIN2/PRKCE/ATP2B…	119
BP	GO:0006829	zinc ion transport	12/3781	28/18723	0.00534963	0.0474329	0.0385135	SLC30A9/SLC30A5/SLC30A6/SLC39A9/SLC39A10/SLC30A7/SLC30A1/SLC39A6/SLC30A4/SLC39A14/SLC1A1/SLC30A8	12
BP	GO:0032801	receptor catabolic process	12/3781	28/18723	0.00534963	0.0474329	0.0385135	PIK3R4/ITCH/BECN1/NEDD4/KIF16B/SNX25/ZNRF3/MYLIP/DTX3L/PTPN1/ABCA2/APOE	12
BP	GO:0070076	histone lysine demethylation	12/3781	28/18723	0.00534963	0.0474329	0.0385135	KDM3B/KDM5A/KDM6A/KDM3A/KDM5B/PHF2/PHF8/KDM1B/JMJD1C/KDM2A/KDM7A/KDM4B	12
BP	GO:0048592	eye morphogenesis	44/3781	151/18723	0.00540145	0.0476282	0.0386721	NIPBL/NF1/SP3/HIPK1/TOPORS/ABI2/PRKCI/PHACTR4/CEP290/CTNNB1/FRS2/RPGRIP1L/TUG1/STAT3/NOTCH2/TTC8/GLI3/ZHX2/BBS4/TDRD7/MAN2A1/DZANK1/SHROOM2/AHI1/BCL2/THRB/HIPK2/TFAP2A/BCAR3/FBN1/PTPRM/WNT5A/CITED2/TENM3/WNT9A/COL5A2/FAT1/COL8A1/NTRK2/COL8A2/EFEMP1/SLC1A1/AQP5/TFAP2B	44
BP	GO:0034332	adherens junction organization	18/3781	49/18723	0.00540249	0.0476282	0.0386721	HIPK1/PAK2/DLG5/CTNNB1/ADAM10/ADD1/PLEKHA7/TJP1/VCL/DCHS1/JAM3/DSP/RDX/FERMT2/MTSS1/CDH11/CDH1/ZNF703	18
BP	GO:0035088	establishment or maintenance of apical/basal cell polarity	18/3781	49/18723	0.00540249	0.0476282	0.0386721	ERBIN/PDCD6IP/DLG1/PRKCI/DLG5/MYO9A/SYNJ2BP/PATJ/LIN7C/OPHN1/TTC8/PARD3B/CLIC4/MTCL1/WNT5A/FAT1/LIN7A/SLC9A3R1	18
BP	GO:0061245	establishment or maintenance of bipolar cell polarity	18/3781	49/18723	0.00540249	0.0476282	0.0386721	ERBIN/PDCD6IP/DLG1/PRKCI/DLG5/MYO9A/SYNJ2BP/PATJ/LIN7C/OPHN1/TTC8/PARD3B/CLIC4/MTCL1/WNT5A/FAT1/LIN7A/SLC9A3R1	18
BP	GO:0030833	regulation of actin filament polymerization	49/3781	172/18723	0.00561767	0.0494547	0.0401551	GMFB/WASL/LATS1/TWF1/AP1AR/RICTOR/DLG1/MTOR/ARFGEF1/NCKAP1/CAPZA2/RASA1/ABI2/ARFIP1/MTPN/FER/SSH1/ADD1/CYFIP1/EPS8/TMOD3/JMY/WASHC5/SPTAN1/FMN1/SPIRE1/ACTR2/SPTBN1/SNX9/CARMIL1/WASF2/SSH2/BAG4/PPP1R9A/GRB2/PRKCE/CRACD/PREX1/SVIL/MYADM/RDX/SLIT2/TMSB10/FHOD3/SSH3/IQGAP2/CYFIP2/ADD3/EVL	49
BP	GO:0150104	transport across blood-brain barrier	28/3781	87/18723	0.00563681	0.0495526	0.0402346	SLC44A1/SLC38A2/SLC5A3/SLC38A1/SLC12A2/SLC22A5/SLC6A6/ABCC1/INSR/ATP2B4/TFRC/SLC7A1/SLC2A13/ABCA2/ABCC5/SLC1A4/SLC2A10/LEPR/SLC4A8/SLC7A2/SLC1A2/LRP2/SLC16A2/SLC7A8/LRP1/APOE/SLC9A3R1/SLC1A1	28
BP	GO:0006298	mismatch repair	14/3781	35/18723	0.00570986	0.04977	0.0404111	SETD2/PMS2/MSH3/XPC/MLH3/ABL1/MCM9/MLH1/TDG/RPA1/MSH6/MSH2/POLD3/AXIN2	14
BP	GO:0007020	microtubule nucleation	14/3781	35/18723	0.00570986	0.04977	0.0404111	CLASP2/CLASP1/AKAP9/HAUS2/CEP192/TUBGCP4/DCTN1/SLAIN2/CKAP5/MECP2/NIN/NDE1/TUBGCP5/RANBP9	14
BP	GO:0008608	attachment of spindle microtubules to kinetochore	14/3781	35/18723	0.00570986	0.04977	0.0404111	APC/HNRNPU/CENPC/ABRAXAS1/ABRAXAS2/BECN1/CHAMP1/MIS12/ECT2/RB1/BUB3/RACGAP1/KNL1/CENPE	14
BP	GO:0034331	cell junction maintenance	14/3781	35/18723	0.00570986	0.04977	0.0404111	DLG1/ERC1/DCTN1/PLEKHA7/TJP1/OPHN1/PCLO/SYNGAP1/CTBP2/F2R/CHCHD10/FERMT2/MTSS1/CBLN2	14
BP	GO:0045880	positive regulation of smoothened signaling pathway	14/3781	35/18723	0.00570986	0.04977	0.0404111	INTU/DLG5/CTNNA1/PDCL/DYNC2H1/ARMC9/NDST1/STK36/EVC/GORAB/CHSY1/FOXA1/DCDC2/GPC3	14
BP	GO:0097502	mannosylation	14/3781	35/18723	0.00570986	0.04977	0.0404111	FKTN/DPY19L4/TMTC3/ALG11/DPY19L3/RXYLT1/PIGB/TMTC2/PIGM/TMTC4/PIGV/LARGE1/DPY19L1/TMTC1	14
BP	GO:0000070	mitotic sister chromatid segregation	48/3781	168/18723	0.00572686	0.0498479	0.0404743	CUL3/ATRX/NIPBL/PDS5A/CDC23/APC/HNRNPU/VPS4B/PDS5B/INO80/SLF2/KPNB1/ANAPC1/TPR/CDC27/CENPC/SMC3/TNKS/BECN1/CHAMP1/SLF1/SMC1A/SMC5/SMC2/CHMP2B/NSL1/POGZ/PIBF1/MIS12/CDK5RAP2/NAA50/RAB11A/RB1/SMC4/NCAPD3/NUMA1/ZWILCH/ATM/KNTC1/BUB3/RAD21/NCAPG2/SGO2/RACGAP1/INCENP/BUB1B/CENPE/CENPF	48
BP	GO:0001558	regulation of cell growth	105/3781	414/18723	0.00574384	0.0499254	0.0405373	USP47/SIN3A/ADNP/DDX3X/KIAA1109/SIRT1/ITCH/ADNP2/DIP2B/TRIM32/INO80/EIF4G2/CDC73/MTOR/GSK3B/PAFAH1B1/BMPR2/CRKL/MTPN/NCBP1/TAF9B/SMAD4/GOLGA4/MACF1/ADAM17/NME6/VGLL4/CDKN2AIP/ABL1/ADAM10/CYFIP1/RAB21/RYK/ACVR1B/RNF6/TSG101/ITSN2/SPAG9/SHTN1/SMARCA2/N6AMT1/ARHGEF11/ULK2/RAB11A/RB1/SEMA4F/RPTOR/CDKL5/ADIPOR2/SLC23A2/SEMA3C/SMAD3/BCL2/OSGIN2/NEDD4L/SERTAD2/PPT1/RERG/SEMA5A/ENPP1/DDR1/SH3BP4/SPART/CD…	105
BP	GO:2000058	regulation of ubiquitin-dependent protein catabolic process	47/3781	164/18723	0.00583472	0.0506353	0.0411137	TAF1/CSNK1A1/HECTD1/UBE3A/ZYG11B/SOCS4/LATS1/XPO1/ANKIB1/UBQLN1/USP7/UBE2K/GSK3B/SMARCC1/RYBP/ARIH1/UBQLN2/RCHY1/WAC/PIAS1/FBXW8/RAD23B/UFL1/BAG5/RNF14/SOCS5/PSEN1/SUFU/BBS7/MAPK9/STYX/PTK2/NFE2L2/USP14/RNF139/OGT/TLK2/PTEN/SVIP/MDM2/GCLC/RNF19A/UBQLN4/HIPK2/MAP1A/HFE/PLK2	47
BP	GO:0010717	regulation of epithelial to mesenchymal transition	31/3781	99/18723	0.0058419	0.0506353	0.0411137	CLASP2/USF3/MTOR/CLASP1/DAG1/SMAD4/SMAD2/CTNNB1/BCL9L/SPRED2/ACVR1/PTEN/LDLRAD4/SMAD3/SPRED1/PHLDB1/IL17RD/TGFBR1/PHLDB2/AXIN2/GATA3/FERMT2/FOXA1/TIAM1/TGFB3/TGFB2/EPHA3/ZNF703/GREM1/OLFM1/HPN	31
BP	GO:0031398	positive regulation of protein ubiquitination	36/3781	119/18723	0.00585999	0.0507209	0.0411832	CUL3/RNF111/CTR9/DDX3X/XIAP/RNF20/UBE3A/MARCHF7/UBQLN1/HUWE1/SENP2/FANCM/PAXIP1/TOPORS/TRAF6/RCHY1/DCUN1D1/DCUN1D4/CRY1/SPRTN/NDFIP1/BTRC/RNF40/BIRC2/MAPK9/NDFIP2/SKP1/BRCA1/MYCBP2/PTEN/FANCI/WFS1/BMI1/ARRDC3/ARRB1/ARRDC4	36
BP	GO:0033059	cellular pigmentation	19/3781	53/18723	0.00586898	0.0507277	0.0411887	AP3B1/PIKFYVE/ARL6/BLOC1S6/AP1G1/SHROOM3/BBS2/KIF13A/BBS7/RAB11A/BBS4/LYST/RAB27B/MYO5A/SHROOM2/BCL2/MREG/MLPH/RAB38	19
BP	GO:0030900	forebrain development	97/3781	379/18723	0.00588354	0.0507825	0.0412332	ATRX/CREB1/SIN3A/SETD2/TOP2B/NF1/METTL14/CELF1/XRN2/SCYL2/ARL13B/GSK3B/PAFAH1B1/KIF5B/CEP120/ARHGAP35/CRKL/TENT2/ATP7A/PHLPP2/TSC1/RRM1/CTNNB1/TTC21B/FRS2/RAB3GAP1/RPGRIP1L/ZMIZ1/NARS1/DYNC2H1/BBS2/RAPGEF2/SECISBP2/RYK/UBA6/BMPR1A/KRAS/PSEN1/NIN/CRK/OPHN1/ZSWIM6/NCOA1/SLC38A2/DOCK7/DIXDC1/NDE1/PCM1/TTC8/GLI3/BBS4/NDST1/TCTN1/GART/FBXO45/TWSG1/PTEN/HOOK3/EZH1/EFHC1/MYO1D/BTBD3/PGAP1/PRKG1/ATP2B4/D…	97
BP	GO:0070085	glycosylation	65/3781	240/18723	0.00590325	0.0508816	0.0413137	FKTN/POFUT1/GXYLT1/TRIP11/DPY19L4/OGA/TMTC3/ALG10B/ALG11/ARFGEF1/MAN1A2/ACER2/EDEM3/TET2/UGGT1/DPY19L3/COG6/RXYLT1/MAGT1/UGGT2/STT3B/PSEN1/PIGB/ALG10/TRAK1/EXTL2/COG3/B3GALNT1/TMTC2/MGAT5/PIGM/TRAK2/PMM2/MAN2A1/B3GNT2/TET3/MAN2A2/TMTC4/OGT/GALNT1/PIGV/LARGE1/GFPT1/NPC1/FUT8/GALNT7/MGAT4A/DPY19L1/ENTPD5/ST8SIA6/POMK/ABCA2/GALNT10/ST3GAL1/ST6GALNAC2/MAN1A1/ST6GAL2/GCNT4/TMTC1/GALNT6/GCNT1/GXYLT2/GA…	65
BP	GO:0032400	melanosome localization	11/3781	25/18723	0.00596568	0.0510635	0.0414614	ARL6/BLOC1S6/BBS2/BBS7/RAB11A/BBS4/RAB27B/MYO5A/SHROOM2/MREG/MLPH	11
BP	GO:0032878	regulation of establishment or maintenance of cell polarity	11/3781	25/18723	0.00596568	0.0510635	0.0414614	ROCK1/RICTOR/ARFGEF1/RAP1B/SHTN1/KIF20B/ROCK2/LLGL1/BCAS3/GATA3/TEK	11
BP	GO:0034389	lipid droplet organization	11/3781	25/18723	0.00596568	0.0510635	0.0414614	FAF2/PPID/RAB3GAP1/CDS1/CDS2/ZFYVE1/FITM2/RAB18/DDHD2/SPART/PTGFRN	11
BP	GO:0060740	prostate gland epithelium morphogenesis	11/3781	25/18723	0.00596568	0.0510635	0.0414614	FEM1B/FRS2/ESR1/AR/FOXA1/SULF1/WNT5A/FGFR2/TNC/TP63/FGF10	11
BP	GO:0071459	protein localization to chromosome, centromeric region	11/3781	25/18723	0.00596568	0.0510635	0.0414614	CTCF/CHAMP1/SMC5/MIS12/RB1/ZWILCH/CENPQ/KNTC1/BUB3/KNL1/BUB1B	11
BP	GO:0032388	positive regulation of intracellular transport	56/3781	202/18723	0.00605441	0.0517514	0.0420199	DHX9/CTDSPL2/CPSF6/ICE1/UBR5/HUWE1/TPR/GSK3B/KIF5B/C2CD5/XPO4/DYNC1H1/UBE2D3/NPEPPS/RBM22/MAPK1/MAPK14/MAPK8/CEP290/TCAF1/TMEM30A/TM9SF4/EFCAB7/EDEM1/NMT1/RAB21/PSEN1/NEDD4/IPO5/PCM1/KIF20B/GLI3/PDCD10/ECT2/LEPROT/MAVS/NUMA1/SORL1/MDM2/SMAD3/TMEM30B/BCAS3/PGAP1/ANK3/RDX/PIK3R1/PRKAA1/AKAP5/MTCL1/CDH1/STOM/ZDHHC2/ABLIM3/GZMB/PDZK1/ERBB2	56
BP	GO:0090501	RNA phosphodiester bond hydrolysis	44/3781	152/18723	0.00614599	0.0524616	0.0425966	CNOT6/CPSF6/XRN2/ERI2/PDE12/DBR1/NOP9/DCP2/DROSHA/CNOT6L/SMG6/CPSF2/EXD2/CNOT1/NCBP1/NUDT21/DIS3/ANGEL2/EXOSC10/PAN2/CNOT8/UTP20/PAN3/DICER1/XRN1/PCF11/CSTF2T/TSR1/KHNYN/NOP14/DIS3L/AGO3/ANGEL1/CSTF2/RNASEL/UTP23/TSNAX/NUDT12/RNASEH1/CNOT7/NUDT16/NOCT/ERN1/AGO2	44
BP	GO:0031648	protein destabilization	17/3781	46/18723	0.00630996	0.0535654	0.0434928	CUL3/FBXW11/SIRT1/CREBBP/CDC73/SENP2/EP300/HTT/PRKDC/UTP25/BTRC/FBXL3/RNF139/PEX2/MDM2/MYLIP/CCDC88C	17
BP	GO:0043616	keratinocyte proliferation	17/3781	46/18723	0.00630996	0.0535654	0.0434928	INTU/NOTCH2/STXBP4/CASK/MED1/YAP1/CDH13/IRF6/KLF9/PTPRK/CD109/EPPK1/FGFR2/SLURP1/AREG/TP63/FGF10	17
BP	GO:0046839	phospholipid dephosphorylation	17/3781	46/18723	0.00630996	0.0535654	0.0434928	SACM1L/MTMR1/OCRL/MTMR12/MTMR6/SYNJ1/MTM1/MTMR9/MTMR4/SYNJ2/INPP5B/MTMR10/INPP4B/PTEN/INPP5F/INPP5J/PLPPR3	17
BP	GO:0061028	establishment of endothelial barrier	17/3781	46/18723	0.00630996	0.0535654	0.0434928	ROCK1/MARVELD2/ADD1/RAPGEF2/TJP1/ZDHHC21/RAP1B/ROCK2/VCL/AFDN/IKBKB/RAP2C/MYADM/RDX/S1PR3/PTPRS/FASN	17
BP	GO:0072028	nephron morphogenesis	25/3781	76/18723	0.0063258	0.0536261	0.0435421	DLG1/GZF1/SMAD4/CTNNB1/PBX1/FMN1/GLI3/SIX4/DCHS1/PKD2/AHI1/BCL2/PKD1/ERBB4/NPNT/GREB1L/GATA3/LGR4/LAMA5/PDGFRB/WNK4/FGF1/GREM1/GPC3/SIX1	25
BP	GO:0044270	cellular nitrogen compound catabolic process	113/3781	451/18723	0.00640784	0.0542472	0.0440464	GIGYF2/DHX9/PUM1/TTC37/PUM2/THRAP3/DCP1A/MTREX/METTL14/SMG1/HNRNPR/CNOT6/CELF1/XRN2/ZC3H14/PHAX/HNRNPU/ROCK1/DHX36/YTHDF3/GSPT1/NBAS/TNRC6A/MTOR/PDE12/ETF1/DCP2/DROSHA/CNOT6L/SMG6/RC3H2/FASTKD2/LRPPRC/TENT2/CNOT1/NCBP1/DIS3/MAPK14/FASTKD3/ANGEL2/SMG7/EXOSC10/TET2/LARP1/PAN2/AGO1/CNOT8/PAN3/METTL16/PAIP1/DICER1/XRN1/ZC3HAV1/FMR1/FXR1/MLH1/RC3H1/PNRC2/SECISBP2/NAF1/SMG8/TDG/TUT7/DIS3L/AGO4/AGO3/EDC…	113
BP	GO:0045727	positive regulation of translation	40/3781	136/18723	0.00651175	0.0547557	0.0444593	DHX9/METTL14/DDX3X/LARP4/DHX36/UHMK1/EIF4G2/YTHDF3/IMPACT/DHX29/MTOR/FASTKD2/EIF2AK4/USP16/MAPK1/FASTKD3/ZCCHC4/LARP1/PRKDC/PAIP1/MRPS27/FMR1/FXR1/GUF1/EIF3C/CPEB3/ITGA2/TENT4B/THBS1/DNAJC3/NGRN/RPS6KB1/DDX39B/SOX4/TOB1/AGO2/RMND1/NIBAN1/CCL5/ERBB2	40
BP	GO:1900180	regulation of protein localization to nucleus	40/3781	136/18723	0.00651175	0.0547557	0.0444593	SIN3A/NUP58/UBR5/LATS1/TPR/GSK3B/POLR1A/CD2AP/RBM22/MAPK1/MAPK14/NMD3/CTNNA1/EFCAB7/OTUD7B/NUP54/PSEN1/SUFU/KAT7/EIF2AK3/IPO5/NOLC1/GLI3/ECT2/RAB23/MAVS/PARP1/CCT2/SMAD3/NVL/DTX3L/YAP1/TFRC/GLUL/PIK3R1/FERMT2/PARP9/DCLK1/CDH1/TMEM98	40
BP	GO:0010039	response to iron ion	13/3781	32/18723	0.00654659	0.0547557	0.0444593	BECN1/ATP7A/SLC11A2/MDM2/BCL2/ALAD/CCND1/ABAT/TFAP2A/HFE/CYBRD1/LCN2/TFF1	13
BP	GO:0034243	regulation of transcription elongation from RNA polymerase II promoter	13/3781	32/18723	0.00654659	0.0547557	0.0444593	HNRNPU/ZMYND11/SUPT16H/CDC73/EAF1/CDK13/CTNNB1/TCERG1/SUPT6H/RNF168/WDR43/LEO1/CDK12	13
BP	GO:0051642	centrosome localization	13/3781	32/18723	0.00654659	0.0547557	0.0444593	DLG1/PAFAH1B1/KIF5B/RANBP2/DYNC1LI2/TBCCD1/AKAP9/NIN/NDE1/PARD3B/SYNE2/ASPM/MISP	13
BP	GO:0021904	dorsal/ventral neural tube patterning	10/3781	22/18723	0.00656536	0.0547557	0.0444593	WDR19/TBC1D32/PSEN1/SUFU/GLI3/TCTN1/TULP3/GORAB/FOXA1/PRKACB	10
BP	GO:0022616	DNA strand elongation	10/3781	22/18723	0.00656536	0.0547557	0.0444593	POT1/POLA1/NBN/LIG3/NUCKS1/MRE11/POLD3/RFC3/DNA2/MCM4	10
BP	GO:0032402	melanosome transport	10/3781	22/18723	0.00656536	0.0547557	0.0444593	ARL6/BLOC1S6/BBS2/BBS7/RAB11A/BBS4/RAB27B/MYO5A/MREG/MLPH	10
BP	GO:0035024	negative regulation of Rho protein signal transduction	10/3781	22/18723	0.00656536	0.0547557	0.0444593	CUL3/SCAI/ARHGAP35/ITGB1/ABL2/TNFAIP1/CCDC125/HEG1/ARHGAP42/ITGA3	10
BP	GO:0035268	protein mannosylation	10/3781	22/18723	0.00656536	0.0547557	0.0444593	FKTN/DPY19L4/TMTC3/DPY19L3/RXYLT1/TMTC2/TMTC4/LARGE1/DPY19L1/TMTC1	10
BP	GO:0060444	branching involved in mammary gland duct morphogenesis	10/3781	22/18723	0.00656536	0.0547557	0.0444593	KDM5B/BTRC/MED1/DDR1/ESR1/TBX3/PGR/AR/WNT5A/AREG	10
BP	GO:0036297	interstrand cross-link repair	15/3781	39/18723	0.00658507	0.054769	0.0444701	ERCC4/FANCM/ERCC6L2/FAN1/ATR/DCLRE1A/MCM9/SLX4/NUCKS1/MSH6/RNF168/FANCF/RFWD3/FANCL/FANCD2	15
BP	GO:0022404	molting cycle process	27/3781	84/18723	0.00660732	0.054769	0.0444701	FARP2/INTU/ATP7A/SMAD4/ZMPSTE24/CTNNB1/ACVR1B/ZDHHC21/SOS1/SAV1/NUMA1/LRIG1/GORAB/BCL2/FZD3/LGR4/TNFRSF19/LAMA5/FZD6/INHBA/WNT5A/CD109/TGFB2/FGFR2/IGFBP5/TP63/FGF10	27
BP	GO:0022405	hair cycle process	27/3781	84/18723	0.00660732	0.054769	0.0444701	FARP2/INTU/ATP7A/SMAD4/ZMPSTE24/CTNNB1/ACVR1B/ZDHHC21/SOS1/SAV1/NUMA1/LRIG1/GORAB/BCL2/FZD3/LGR4/TNFRSF19/LAMA5/FZD6/INHBA/WNT5A/CD109/TGFB2/FGFR2/IGFBP5/TP63/FGF10	27
BP	GO:0097061	dendritic spine organization	27/3781	84/18723	0.00660732	0.054769	0.0444701	CAPRIN1/UBE3A/WASL/DHX36/OPA1/PAFAH1B1/ABI2/ADAM10/DNM1L/ACTR2/EEF2K/TANC1/VPS35/ABHD17B/PTEN/PPP1R9A/IGF1R/TANC2/ZMYND8/PDLIM5/INSR/HOMER1/TIAM1/CTNND2/ITGA3/SRCIN1/APOE	27
BP	GO:0006900	vesicle budding from membrane	21/3781	61/18723	0.00663926	0.054769	0.0444701	CUL3/SEC24B/WASL/AP3B1/SEC24C/KLHL12/FNBP1L/PPP6C/PRKCI/SEC24A/GBF1/SEC23B/GOLPH3/SEC31A/VAPB/TMED10/SEC24D/SEC23A/MIA3/GOLPH3L/MYO18A	21
BP	GO:0040014	regulation of multicellular organism growth	21/3781	61/18723	0.00663926	0.054769	0.0444701	CREB1/NIPBL/CELF1/ATRN/TNKS2/MBD5/ZMPSTE24/PIK3CA/BBS2/RAI1/STAT3/AFG3L2/SGPL1/FTO/PLS1/BCL2/STAT5B/GPAM/GPAT4/CHD7/GHR	21
BP	GO:0010172	embryonic body morphogenesis	6/3781	10/18723	0.00668217	0.054769	0.0444701	CLASP2/CLASP1/DAG1/ZNF281/PHLDB1/PHLDB2	6
BP	GO:0030953	astral microtubule organization	6/3781	10/18723	0.00668217	0.054769	0.0444701	KPNB1/DLG1/CLASP1/CEP120/RAB11A/NUMA1	6
BP	GO:0035520	monoubiquitinated protein deubiquitination	6/3781	10/18723	0.00668217	0.054769	0.0444701	USP47/USP7/USP16/ASXL1/MYSM1/USP1	6
BP	GO:0035871	protein K11-linked deubiquitination	6/3781	10/18723	0.00668217	0.054769	0.0444701	USP37/USP30/OTUD7B/VCPIP1/OTUD3/OTUB2	6
BP	GO:0048194	Golgi vesicle budding	6/3781	10/18723	0.00668217	0.054769	0.0444701	PRKCI/GBF1/GOLPH3/TMED10/GOLPH3L/MYO18A	6
BP	GO:0071233	cellular response to leucine	6/3781	10/18723	0.00668217	0.054769	0.0444701	LARS1/UBR1/MTOR/UBR2/RPTOR/SESN3	6
BP	GO:1901203	positive regulation of extracellular matrix assembly	6/3781	10/18723	0.00668217	0.054769	0.0444701	CLASP2/CLASP1/DAG1/SMAD3/PHLDB1/PHLDB2	6
BP	GO:0060541	respiratory system development	56/3781	203/18723	0.00675083	0.0552584	0.0448675	CREB1/SEC24B/SP3/AP3B1/EP300/DAG1/RC3H2/BMPR2/EIF4E/MAN1A2/ATP7A/ATXN1L/MAPK1/DLG5/GRHL2/SMAD2/CTNNB1/ASXL1/RPGRIP1L/SMCHD1/BMPR1A/KRAS/PTGES3/GLI3/MAN2A1/TULP3/SAV1/SIX4/CELSR1/SPEF2/YAP1/THRB/PKD1/HEG1/ABCA3/PGR/FOXA1/LAMA5/CHD7/PDGFRB/ITGA3/WNT5A/TGFB3/FGF1/RARA/FGFR2/IGFBP5/SREBF1/LOX/AGR2/TNC/GPC3/ASCL1/FGF10/SPDEF/SIX1	56
BP	GO:0006497	protein lipidation	29/3781	92/18723	0.00677976	0.0554009	0.0449832	PIK3C3/RAB3GAP2/PIGN/PPM1A/ZDHHC17/RABL3/PIGO/RAB3GAP1/NMT1/PIGB/ZDHHC21/PIGK/PIGS/ZDHHC20/PIGM/GOLGA7/PIGG/HHAT/SVIP/PIGV/ATG16L1/ZDHHC23/PGAP1/PIGW/UGCG/ABCA1/GLUL/WIPI1/ZDHHC2	29
BP	GO:0008380	RNA splicing	109/3781	434/18723	0.00678616	0.0554009	0.0449832	RBM12/DHX9/DDX46/YTHDC1/REST/HNRNPK/THRAP3/SCAF11/SF3B1/SON/ZNF638/MTREX/DHX15/SRSF10/METTL14/PRPF40A/GEMIN5/NUP98/PRPF4B/HNRNPR/CELF1/RBM12B/HNRNPU/AQR/ZC3H13/SNRNP200/SRPK2/DHX8/THOC2/PPP4R2/PPIG/SREK1/DBR1/SNIP1/PRMT5/SETX/SNRNP48/SF3A1/POLR2A/CDC40/CDK13/SLU7/RBM41/SRSF1/RBM23/RSRC1/NCBP1/DYRK1A/DDX20/RBM22/PRPF8/CRNKL1/SRRM2/MFAP1/DDX17/PTBP3/FAM172A/VIRMA/RBM25/METTL16/RBM39/PPWD1/RBFOX2/EC…	109
BP	GO:0030510	regulation of BMP signaling pathway	30/3781	96/18723	0.00683109	0.0556207	0.0451616	CTDSPL2/XIAP/LEMD3/TRIM33/BMPR2/UBE2D3/SMAD4/SMAD2/ABL1/NOTCH2/SKIL/TWSG1/NUMA1/NEO1/SORL1/CRIM1/ELAPOR2/PCSK6/SMURF2/HIPK2/SPART/TOB1/FBN1/SULF1/LRP2/ITGA3/WNT5A/GREM1/GPC3/TFAP2B	30
BP	GO:0042158	lipoprotein biosynthetic process	30/3781	96/18723	0.00683109	0.0556207	0.0451616	PIK3C3/RAB3GAP2/PIGN/PPM1A/ZDHHC17/RABL3/PIGO/RAB3GAP1/NMT1/PIGB/ZDHHC21/PIGK/PIGS/ZDHHC20/PIGM/GOLGA7/PIGG/HHAT/SVIP/PIGV/ATG16L1/ZDHHC23/PGAP1/PIGW/UGCG/ABCA1/GLUL/WIPI1/ZDHHC2/APOE	30
BP	GO:0044728	DNA methylation or demethylation	31/3781	100/18723	0.00686208	0.0557262	0.0452473	ATRX/CTCF/BAZ2A/USP7/PRMT5/OTUD4/KMT2E/ATF7IP/USP9X/ZMPSTE24/RLF/GRHL2/TET2/PIK3CA/KMT2A/MECP2/KDM1B/TDG/MPHOSPH8/N6AMT1/MTRR/FTO/TET3/PARP1/BRCA1/DNMT1/PPM1D/TDRKH/BMI1/GATA3/TDRD5	31
BP	GO:0110020	regulation of actomyosin structure organization	31/3781	100/18723	0.00686208	0.0557262	0.0452473	CLASP2/ROCK1/ALMS1/MTOR/CLASP1/PAK2/SMAD4/TSC1/ABL1/TJP1/AKAP13/TTC8/ECT2/ROCK2/CARMIL1/WASF2/PPFIA1/BAG4/PPP1R9A/SMAD3/TGFBR1/PHLDB2/PIK3R1/RHPN2/FERMT2/LPAR1/SDC4/CGNL1/TGFB3/EVL/LIMCH1	31
BP	GO:0048015	phosphatidylinositol-mediated signaling	50/3781	178/18723	0.00696724	0.056506	0.0458804	PIK3C2A/NF1/EXOC1/SIRT1/UBE3A/PIK3C3/BECN1/PI4KA/PIK3CA/PIK3CB/KBTBD2/PIP5K1A/CBL/NEDD4/PTK2/PTPN13/OGT/FBXL2/ERBB3/PTEN/IRS1/MAZ/CAT/INPP5F/IGF1R/RPS6KB1/INSR/ERBB4/ENTPD5/PDGFC/HCST/PLCD4/PIK3R1/F2R/UNC5B/GATA3/PDGFD/FGFR1/PDGFRB/FN1/TEK/GAB2/PLCL1/TGFB2/SLC9A3R1/NTRK2/CCL5/CA8/FLT3/ERBB2	50
BP	GO:0003007	heart morphogenesis	66/3781	246/18723	0.0069919	0.0565575	0.0459223	NIPBL/SEC24B/MIB1/ARID2/ATF2/PTCD2/ARL13B/MTOR/CERT1/BMPR2/CRKL/SMAD4/ZMPSTE24/GRHL2/CTNNB1/ASXL1/ZMIZ1/BMPR1A/PSEN1/SUFU/C2CD3/NOTCH2/BBS7/SOS1/PTK2/NSD2/BBS4/SAV1/PARVA/ACVR1/DCHS1/PKD2/MED1/SEMA3C/MDM2/AHI1/MICAL2/SMAD3/MDM4/YAP1/PKP2/INSR/DSP/TGFBR1/AXIN2/SOX4/HEG1/TBX3/GATA3/SLIT2/STIL/CHD7/LRP2/WNT5A/CITED2/TEK/PDCD4/TGFB2/SLIT3/FGFR2/CPE/NPY1R/OLFM1/TGFBR3/COL11A1/SIX1	66
BP	GO:0051402	neuron apoptotic process	66/3781	246/18723	0.0069919	0.0565575	0.0459223	LANCL1/ADNP/NF1/XIAP/ATF2/SRPK2/PDPK1/RASA1/PRKCI/BCL2L11/OXR1/PIK3CA/SNX6/CTNNB1/MECP2/KRAS/PSEN1/CPEB4/LIG4/NMNAT1/USP53/NCSTN/RB1/MSH2/FOXO3/MAP2K4/PARP1/TMTC4/SIX4/BACE1/ERBB3/SYNGAP1/GCLC/BCL2/GBE1/GCLM/MYB/THRB/PPT1/HIPK2/HYOU1/WFS1/ARRB1/F2R/UNC5B/TFAP2A/RETREG1/GATA3/STXBP1/TOX3/EGLN2/TGFB3/LRP1/TGFB2/CX3CR1/APOE/NR4A2/BTG2/NTRK2/LCN2/EN1/TP63/ASCL1/SLC1A1/SIX1/TFAP2B	66
BP	GO:0033500	carbohydrate homeostasis	69/3781	259/18723	0.00705174	0.0567976	0.0461172	SIN3A/SIRT1/PTPN11/RAF1/WDR35/HECTD4/MBD5/OPA1/KIF5B/RAB11FIP2/OSBP/ZNF236/STXBP3/HMGCR/CCDC186/PPP3CB/PIK3CA/APPL2/CRY1/NUCKS1/STAT3/SELENOT/CYB5R4/STXBP4/FOXO3/TENT4B/HK1/ADIPOR2/IRS1/PDK3/PFKM/GCLC/IGF1R/UNC13B/GCLM/INSR/PDK2/CRY2/PRKCE/SLC39A14/WFS1/KLF7/ANO1/HK2/ERN1/PIK3R1/SOX4/XBP1/PPP3CA/LEPR/PRKAA1/ADGRF5/PRKAA2/FOXA1/KCNJ11/TIAM1/GPR27/SYBU/ABCG1/CYBA/LRP1/SESN3/ABCC8/IGFBP5/CAMK2N1/PDK…	69
BP	GO:0048872	homeostasis of number of cells	72/3781	272/18723	0.00708034	0.0567976	0.0461172	GIGYF2/SMAD5/IREB2/WDR48/SP3/PTPN11/AP3B1/RCOR1/SOS2/ARID4A/KMT2E/NAPEPLD/RC3H2/ARNT/UFL1/MAPK14/ZFX/ADAM17/BCL2L11/PPP3CB/PIK3CB/PTBP3/ASXL1/ABL1/PRKDC/RBFOX2/SLC11A2/TMOD3/ADAR/RC3H1/ACVR1B/KRAS/SMAP1/LPCAT3/STAT3/KAT7/UBAP2L/SOS1/HSPA9/ABCB10/NCSTN/RB1/FOXO3/SKIL/VPS54/GPRASP2/FLVCR1/MED1/BCL2/JAM3/KITLG/NCAPG2/KLF13/STAT5B/HIPK2/GPAM/SOX4/F2R/GATA3/ARMCX1/ADGRF5/LGR4/PMAIP1/INHBA/GCNT4/CITED2…	72
BP	GO:0006491	N-glycan processing	9/3781	19/18723	0.00708591	0.0567976	0.0461172	MAN1A2/GANAB/MAN2A1/MAN2A2/GNPTAB/FUT8/MGAT4A/ST8SIA6/MAN1A1	9
BP	GO:0035728	response to hepatocyte growth factor	9/3781	19/18723	0.00708591	0.0567976	0.0461172	CREB1/APPL1/GAB1/APPL2/CRK/MED1/GCLC/GCLM/ADAMTS12	9
BP	GO:0060065	uterus development	9/3781	19/18723	0.00708591	0.0567976	0.0461172	NIPBL/ASH1L/SMAD4/KDM5B/ESR1/GREB1L/GATA3/WNT5A/TGFB2	9
BP	GO:0140131	positive regulation of lymphocyte chemotaxis	9/3781	19/18723	0.00708591	0.0567976	0.0461172	WNK1/OXSR1/ADAM17/ADAM10/STK39/WNT5A/CCL5/S100A7/CXCL13	9
BP	GO:2000369	regulation of clathrin-dependent endocytosis	9/3781	19/18723	0.00708591	0.0567976	0.0461172	WASL/SCYL2/UBQLN2/PIK3CB/SMAP1/NEU3/BMP2K/DGKD/DNAJC6	9
BP	GO:0001933	negative regulation of protein phosphorylation	88/3781	342/18723	0.00722853	0.0578657	0.0469845	NF1/IPO7/APC/IBTK/SUZ12/SIRT1/SMCR8/SOCS4/LATS1/PRKAR2A/IMPACT/PDPK1/MTOR/TRAF3IP1/GGNBP2/CRKL/PRKAR1A/PAK2/CTDSP2/HIPK3/HMGCR/ATG14/PPP1R15B/AIDA/SNX6/PIK3CB/ABL1/ZNF675/PRKDC/ADAR/PPP2R5D/GSKIP/SOCS5/PSEN1/TSG101/PIBF1/OCLN/CBL/LRP6/SPAG9/IPO5/YWHAG/DNAJC10/CEP85/ZBED3/PTPN13/SPRED2/INCA1/RB1/NNT/GNAQ/DUSP3/SNX25/CTDSPL/PTEN/GPD1L/SORL1/DNAJC3/LDLRAD4/INPP5F/PAQR3/NCAPG2/PTPN1/ENPP1/SPRED1/CDKN…	88
BP	GO:0031333	negative regulation of protein-containing complex assembly	41/3781	141/18723	0.00733134	0.0583357	0.0473661	DDX3X/RAF1/IMPACT/TWF1/EP300/TRAF3IP1/GSK3B/ARFGEF1/CAPZA2/PPM1A/MTPN/DYRK1A/CRBN/AIDA/SSH1/ADD1/EPS8/TMOD3/SPTAN1/TFIP11/BIRC2/SPTBN1/CARMIL1/SSH2/PEX5/SVIP/SORL1/LDLRAD4/JAM3/FKBP4/CRACD/SVIL/MYADM/RDX/STXBP1/SLIT2/TMSB10/FHOD3/SSH3/INPP5J/ADD3	41
BP	GO:0006509	membrane protein ectodomain proteolysis	16/3781	43/18723	0.00736909	0.0583357	0.0473661	ROCK1/DAG1/ADAM17/ADAM10/LRIG2/PSEN1/SPPL2A/SH3D19/NCSTN/SNX9/BACE1/PTPN3/ERAP1/ADAM9/TIMP3/APOE	16
BP	GO:0098927	vesicle-mediated transport between endosomal compartments	16/3781	43/18723	0.00736909	0.0583357	0.0473661	PIK3C3/HOOK1/DNAJC13/LMTK2/EEA1/BECN1/MAPK1/CHMP3/RAB21/KIF16B/SORL1/HOOK3/MYO1D/SNX16/RDX/EMP2	16
BP	GO:0007183	SMAD protein complex assembly	7/3781	13/18723	0.00738392	0.0583357	0.0473661	PPM1A/SMAD4/SMAD2/SMAD1/PARP1/LDLRAD4/SMAD3	7
BP	GO:0018206	peptidyl-methionine modification	7/3781	13/18723	0.00738392	0.0583357	0.0473661	NAA35/NAA30/NAA25/NAA15/METAP2/NAA16/METAP1	7
BP	GO:0033145	positive regulation of intracellular steroid hormone receptor signaling pathway	7/3781	13/18723	0.00738392	0.0583357	0.0473661	KMT2D/PARP1/MED1/YAP1/AR/FOXA1/SRARP	7
BP	GO:0043201	response to leucine	7/3781	13/18723	0.00738392	0.0583357	0.0473661	LARS1/PIK3C3/UBR1/MTOR/UBR2/RPTOR/SESN3	7
BP	GO:0009048	dosage compensation by inactivation of X chromosome	8/3781	16/18723	0.00741939	0.0583357	0.0473661	YTHDC1/HNRNPU/RLIM/EXOSC10/SMCHD1/CDYL/BRCA1/PCGF5	8
BP	GO:0009299	mRNA transcription	8/3781	16/18723	0.00741939	0.0583357	0.0473661	AP3B1/ZBTB1/HIPK3/STAT3/SUPT6H/TFCP2/MED1/SREBF1	8
BP	GO:0033631	cell-cell adhesion mediated by integrin	8/3781	16/18723	0.00741939	0.0583357	0.0473661	WNK1/ITGB1/SWAP70/ADAM9/NPNT/PODXL/CCL5/CXCL13	8
BP	GO:0048311	mitochondrion distribution	8/3781	16/18723	0.00741939	0.0583357	0.0473661	OPA1/MTM1/DNM1L/TRAK1/MEF2A/TRAK2/ARMC1/MAPT	8
BP	GO:0060004	reflex	8/3781	16/18723	0.00741939	0.0583357	0.0473661	USP46/AFG3L2/NPNT/GLRB/SLITRK6/HPN/ASCL1/SLC1A1	8
BP	GO:0061548	ganglion development	8/3781	16/18723	0.00741939	0.0583357	0.0473661	CTNNB1/TULP3/SIX4/FZD3/SEMA3F/UNC5C/ASCL1/SIX1	8
BP	GO:2000001	regulation of DNA damage checkpoint	8/3781	16/18723	0.00741939	0.0583357	0.0473661	FEM1B/ETAA1/CRY1/CUL4A/MAP3K20/RFWD3/WDR76/DDX39B	8
BP	GO:2001032	regulation of double-strand break repair via nonhomologous end joining	12/3781	29/18723	0.00747354	0.0586868	0.0476511	RIF1/ERCC6/POT1/KMT5B/SHLD2/PRKDC/SMCHD1/TFIP11/NSD2/DTX3L/DEK/PARP9	12
BP	GO:0034250	positive regulation of cellular amide metabolic process	46/3781	162/18723	0.00758984	0.0595036	0.0483144	DHX9/SP1/METTL14/DDX3X/LARP4/DHX36/UHMK1/EIF4G2/YTHDF3/IMPACT/DHX29/MTOR/FASTKD2/EIF2AK4/USP16/MAPK1/FASTKD3/ZCCHC4/LARP1/PRKDC/PAIP1/MRPS27/FMR1/FXR1/GUF1/NFE2L2/ROCK2/EIF3C/CPEB3/ITGA2/TENT4B/THBS1/DNAJC3/NGRN/RPS6KB1/SLC2A13/ABCA2/DDX39B/SOX4/TOB1/AGO2/RMND1/ABCG1/NIBAN1/CCL5/ERBB2	46
BP	GO:0140056	organelle localization by membrane tethering	25/3781	77/18723	0.00760645	0.0595036	0.0483144	EXOC4/BLOC1S6/ATP2A2/STXBP3/STX17/ATG14/AHCYL1/CEP290/PDZD8/USO1/RAB10/STX12/SNAP29/NSF/VAPB/ESYT1/ESYT2/RAB3D/UNC13B/SYTL2/RAB3IP/CTBP2/RAB8B/STXBP1/SYT1	25
BP	GO:1901983	regulation of protein acetylation	25/3781	77/18723	0.00760645	0.0595036	0.0483144	SIN3A/CTCF/DDX3X/SIRT1/DIP2B/TAOK1/PAXIP1/GSK3B/SETD5/GLYR1/SMAD4/ZMPSTE24/CEP295/KMT2A/KAT7/RPS6KA5/ARNTL/TADA2B/FAM161A/BRCA1/ARRB1/SOX4/PRKAA1/GATA3/PRKAA2	25
BP	GO:0010762	regulation of fibroblast migration	14/3781	36/18723	0.00763559	0.0596336	0.0484199	APPL1/FER/APPL2/ITGB1/RFFL/PTK2/MACIR/ADIPOR2/BAG4/THBS1/PRKCE/AKAP12/SDC4/DDR2	14
BP	GO:0007093	mitotic cell cycle checkpoint signaling	38/3781	129/18723	0.00764237	0.0596336	0.0484199	GIGYF2/APC/ATF2/RAD17/TAOK1/SDE2/TPR/XPC/ABRAXAS1/WAC/RINT1/TOPBP1/NBN/PRKDC/BRCC3/TAOK3/MRE11/CDK5RAP2/MDC1/MSH2/MAP3K20/ZWILCH/BRCA1/ATM/KNTC1/MDM2/RFWD3/BUB3/NEK11/FOXN3/CCND1/FANCD2/CDKN1B/SOX4/BUB1B/DTL/PLK2/CENPF	38
BP	GO:0099003	vesicle-mediated transport in synapse	55/3781	200/18723	0.00771066	0.0600906	0.048791	PREPL/KIAA1109/ROCK1/USP46/AP3B1/CLCN3/GSK3B/BLOC1S6/ATP2A2/FCHO2/SNAP23/BTBD9/PPP3CB/AP2B1/CTNNB1/RAB3GAP1/SYNJ1/CYFIP1/FMR1/EPS15/DNM1L/CANX/PSEN1/ITSN2/OPHN1/RAP1B/ITSN1/VAMP4/SYNJ2/SNAP29/BTBD8/RAB11A/PCLO/RAB27B/CASK/BACE1/PTEN/UNC13B/CTBP2/FBXL20/STXBP5/RAPGEF4/NAPB/CADPS2/SLC4A8/STXBP1/GRIP1/RIMS4/DNAJC6/AMPH/SYT7/ADCY1/SYT9/STON2/SYT1	55
BP	GO:0009100	glycoprotein metabolic process	98/3781	387/18723	0.00775724	0.0603775	0.0490239	FKTN/POFUT1/GXYLT1/MARCHF6/TRIP11/DPY19L4/OGA/TMTC3/ALG10B/ALG11/ARFGEF1/BMPR2/MAN1A2/ACER2/ATP7A/FAM20B/EDEM3/TET2/UGGT1/CTNNB1/DPY19L3/RXYLT1/EDEM1/BPNT2/MAGT1/UGGT2/STT3B/PSEN1/ALG10/GOLPH3/TRAK1/EXTL2/COG3/GLCE/CSGALNACT2/GANAB/HS2ST1/B3GALNT1/TMTC2/MGAT5/NCSTN/PAWR/NDST1/TRAK2/RNF139/PMM2/MAN2A1/B3GNT2/TET3/MAN2A2/PXYLP1/TMTC4/OGT/GNPTAB/GALNT1/CANT1/BCL2/LARGE1/CHSY1/GFPT1/NPC1/PCSK6/FUT8/C…	98
BP	GO:2000736	regulation of stem cell differentiation	20/3781	58/18723	0.00780145	0.0606452	0.0492413	REST/HNRNPU/ITCH/DHX36/CDK13/KDM3A/NUDT21/ABL1/PRKDC/STAT3/HSPA9/NFE2L2/EIF2AK2/CDK12/N4BP2L2/YAP1/PUS7/ZFP36L2/TGFB2/RBM24	20
BP	GO:0090596	sensory organ morphogenesis	68/3781	256/18723	0.00797743	0.0619353	0.0502888	NIPBL/SEC24B/NF1/SP3/HIPK1/PRKRA/MYO6/TOPORS/INTU/ABI2/PRKCI/MAPK1/PHACTR4/CEP290/WDR19/CTNNB1/FRS2/RPGRIP1L/TUG1/STAT3/NOTCH2/TTC8/GLI3/ZHX2/BBS4/TDRD7/MAN2A1/PLS1/SIX4/TSHZ1/LRIG1/DZANK1/SHROOM2/AHI1/BCL2/THRB/TTC39C/HIPK2/FZD3/TFAP2A/GATA3/FZD6/BCAR3/FBN1/PTPRM/CHD7/WNT5A/STOX1/CITED2/TENM3/WNT9A/COL5A2/FAT1/FGFR2/SLITRK6/COL8A1/SLC9A3R1/NTRK2/SLC44A4/HPN/COL8A2/FGF10/EFEMP1/COL11A1/SLC1A1/SIX…	68
BP	GO:0000041	transition metal ion transport	32/3781	105/18723	0.00801379	0.0620617	0.0503914	SLC30A9/IREB2/LMTK2/SLC30A5/ABCB7/SLC30A6/SLC39A9/ATP7A/SLC39A10/SLC11A2/ATP2C1/SLC30A7/SLC30A1/FLVCR1/CLTC/SLC39A6/PGRMC2/SLC30A4/ATP7B/SLC31A1/FKBP4/TFRC/SLC46A1/SLC39A14/ABCC5/SLC40A1/HFE/CYBRD1/STEAP2/LCN2/SLC1A1/SLC30A8	32
BP	GO:0032231	regulation of actin filament bundle assembly	32/3781	105/18723	0.00801379	0.0620617	0.0503914	CLASP2/ROCK1/ALMS1/MTOR/CLASP1/PAK2/TSC1/ABL1/TJP1/TTC8/ROCK2/CARMIL1/WASF2/PPFIA1/BAG4/PPP1R9A/SMAD3/SWAP70/TGFBR1/PHLDB2/RDX/PIK3R1/RHPN2/FERMT2/SYNPO2/LPAR1/SDC4/CGNL1/MTSS1/TGFB3/EVL/LIMCH1	32
BP	GO:0006486	protein glycosylation	61/3781	226/18723	0.008059	0.0621849	0.0504915	FKTN/POFUT1/GXYLT1/TRIP11/DPY19L4/OGA/TMTC3/ALG10B/ALG11/ARFGEF1/MAN1A2/ACER2/EDEM3/TET2/UGGT1/DPY19L3/RXYLT1/MAGT1/UGGT2/STT3B/PSEN1/ALG10/TRAK1/EXTL2/COG3/B3GALNT1/TMTC2/MGAT5/TRAK2/PMM2/MAN2A1/B3GNT2/TET3/MAN2A2/TMTC4/OGT/GALNT1/LARGE1/GFPT1/NPC1/FUT8/GALNT7/MGAT4A/DPY19L1/ENTPD5/ST8SIA6/POMK/ABCA2/GALNT10/ST3GAL1/ST6GALNAC2/MAN1A1/ST6GAL2/GCNT4/TMTC1/GALNT6/GCNT1/GXYLT2/GALNT16/GALNT5/FUT3	61
BP	GO:0043413	macromolecule glycosylation	61/3781	226/18723	0.008059	0.0621849	0.0504915	FKTN/POFUT1/GXYLT1/TRIP11/DPY19L4/OGA/TMTC3/ALG10B/ALG11/ARFGEF1/MAN1A2/ACER2/EDEM3/TET2/UGGT1/DPY19L3/RXYLT1/MAGT1/UGGT2/STT3B/PSEN1/ALG10/TRAK1/EXTL2/COG3/B3GALNT1/TMTC2/MGAT5/TRAK2/PMM2/MAN2A1/B3GNT2/TET3/MAN2A2/TMTC4/OGT/GALNT1/LARGE1/GFPT1/NPC1/FUT8/GALNT7/MGAT4A/DPY19L1/ENTPD5/ST8SIA6/POMK/ABCA2/GALNT10/ST3GAL1/ST6GALNAC2/MAN1A1/ST6GAL2/GCNT4/TMTC1/GALNT6/GCNT1/GXYLT2/GALNT16/GALNT5/FUT3	61
BP	GO:0010761	fibroblast migration	17/3781	47/18723	0.00805989	0.0621849	0.0504915	APPL1/FER/APPL2/ITGB1/RFFL/PIP5K1A/PTK2/SGPL1/MACIR/ADIPOR2/BAG4/THBS1/PRKCE/ARID5B/AKAP12/SDC4/DDR2	17
BP	GO:0070997	neuron death	92/3781	361/18723	0.00807374	0.0622141	0.0505152	CREB1/REST/LANCL1/ADNP/NF1/XIAP/ATF2/SIRT1/SRPK2/BTBD10/PDPK1/MTOR/GSK3B/RASA1/PRKCI/BCL2L11/AP2B1/BAG5/TSC1/OXR1/SSH1/PIK3CA/SNX6/CTNNB1/TBK1/ABL1/REL/MECP2/KRAS/PSEN1/CPEB4/STAT3/EIF2S1/CBL/LIG4/NMNAT1/USP53/NCSTN/RB1/MSH2/FOXO3/PSMC1/VPS35/MAP2K4/PARP1/TMTC4/SIX4/BACE1/ERBB3/SLC23A2/SORL1/SYNGAP1/GCLC/BCL2/GBE1/GCLM/MYB/THRB/PPT1/HIPK2/HYOU1/WFS1/ARRB1/F2R/UNC5B/TFAP2A/RETREG1/GATA3/STXBP1/MAP…	92
BP	GO:0046824	positive regulation of nucleocytoplasmic transport	21/3781	62/18723	0.00816705	0.0628547	0.0510353	DHX9/CTDSPL2/CPSF6/UBR5/TPR/GSK3B/XPO4/RBM22/MAPK1/MAPK14/EFCAB7/PSEN1/NEDD4/IPO5/GLI3/ECT2/MAVS/MDM2/SMAD3/PIK3R1/CDH1	21
BP	GO:0060491	regulation of cell projection assembly	52/3781	188/18723	0.00832002	0.0639524	0.0519266	APC/CEP97/CCP110/WASL/TWF1/MTOR/NCKAP1/FNBP1L/ABI2/CEP120/ARHGAP35/FER/ATP7A/CEP135/PIK3CA/HTT/CYFIP1/EPS8/FMR1/FXR1/SEPTIN7/ATMIN/OCLN/ATP8B1/SDCCAG8/ACTR2/DYNC2LI1/IFT88/BBS4/AKIRIN1/WASF2/TAPT1/CDKL5/PPP1R9A/BCAS3/ZMYND8/YAP1/IFT140/MNS1/TGFBR1/RDX/PIK3R1/FAM110C/SLIT2/PODXL/ZMYND10/DCDC2/TGFB3/EVL/COBL/NEURL1/CCL19	52
BP	GO:2000045	regulation of G1/S transition of mitotic cell cycle	41/3781	142/18723	0.00833913	0.0640196	0.0519812	GIGYF2/APPL1/DDX3X/APC/INO80/CDC73/ANKRD17/SDE2/DLG1/RBL2/KMT2E/WAC/CTDSP2/LSM11/ADAM17/APPL2/PRKDC/PSME3/ECD/WEE1/CUL4A/RB1/CTDSPL/RPTOR/PKD2/PTEN/ATM/ZNF655/MDM2/RFWD3/BCL2/PKD1/KANK2/CCND1/CDKN1B/RBL1/RDX/SOX4/E2F7/PLK2/FGF10	41
BP	GO:2000573	positive regulation of DNA biosynthetic process	22/3781	66/18723	0.00847411	0.0647868	0.0526041	POT1/TNKS2/XRCC5/ATR/TNKS/MAPK1/GRHL2/CTNNB1/NEK7/NAF1/PTGES3/MAP3K4/RFC5/ATM/CCT2/NVL/HSP90AA1/RFC3/DDX39B/PDGFRB/GREM1/PKIB	22
BP	GO:0048843	negative regulation of axon extension involved in axon guidance	11/3781	26/18723	0.00848099	0.0647868	0.0526041	RYK/SEMA4F/SEMA3C/SEMA5A/SEMA3F/SEMA4B/WNT3/SEMA6D/WNT5A/SEMA3E/SEMA3B	11
BP	GO:0051875	pigment granule localization	11/3781	26/18723	0.00848099	0.0647868	0.0526041	ARL6/BLOC1S6/BBS2/BBS7/RAB11A/BBS4/RAB27B/MYO5A/SHROOM2/MREG/MLPH	11
BP	GO:1904353	regulation of telomere capping	11/3781	26/18723	0.00848099	0.0647868	0.0526041	ERCC4/TNKS2/USP7/SMG6/TNKS/MAPK1/NBN/NEK7/MAP3K4/ATM/PKIB	11
BP	GO:0010976	positive regulation of neuron projection development	46/3781	163/18723	0.00854872	0.0652236	0.0529587	ADNP/CAPRIN1/ATF1/KIDINS220/FBXO38/DHX36/TWF1/EP300/OPA1/MTOR/RRN3/PAFAH1B1/SETX/TMEM106B/ARHGAP35/PRKCI/IQGAP1/TMEM30A/CYFIP1/CBFA2T2/WASHC5/RAPGEF2/DNM1L/SCARB2/ABL2/ACTR2/EEF2K/NFE2L2/NPTN/PPP1R9A/AMIGO1/ENC1/TIAM1/ITGA3/WNT5A/RET/LRP1/TENM3/COBL/EPHA3/APOE/ITGA6/SERPINI1/CNTN1/NTRK2/S100A9	46
BP	GO:0022604	regulation of cell morphogenesis	80/3781	309/18723	0.00857338	0.065331	0.053046	PRPF40A/ZMYM4/CAPRIN1/LARP4/DHX36/ZMYM3/MKLN1/AP1AR/PHIP/ZRANB1/BRWD1/DLG1/OPA1/PAFAH1B1/DAG1/RASA1/CAMSAP1/TBCCD1/ARHGAP35/CRKL/FBXW8/BRWD3/ZMPSTE24/RREB1/EPB41/MACF1/MYO9A/ABL1/PRKDC/MYH10/PDZD8/CYFIP1/EPS8/SHROOM3/RAB21/SEPTIN7/DNM1L/AGO4/CRK/ITSN2/ACTR2/SPAG9/EEF2K/PTK2/FITM2/DOCK1/SH3D19/BCL9L/RHOBTB1/CARMIL1/PARVA/CDC42SE1/CDKL5/FGD6/SLC23A2/FGD4/NEDD4L/PREX1/MYADM/RDX/RHOBTB3/DNMBP/FERMT2/…	80
BP	GO:0030866	cortical actin cytoskeleton organization	15/3781	40/18723	0.00860408	0.0654037	0.053105	ROCK1/AKAP11/PDCD6IP/DLG1/NCKAP1/EPB41/ECT2/ROCK2/PLS1/LLGL1/IKBKB/EPB41L1/RACGAP1/FHOD3/EPB41L2	15
BP	GO:0097352	autophagosome maturation	15/3781	40/18723	0.00860408	0.0654037	0.053105	EPG5/SMCR8/UBQLN1/ATP2A2/RUBCN/STX17/ATG14/CHMP3/FYCO1/TSG101/SNAP29/SNX14/LAMP2/UBQLN4/CALCOCO2	15
BP	GO:0006482	protein demethylation	13/3781	33/18723	0.00883821	0.0667728	0.0542167	KDM3B/KDM5A/KDM6A/KDM3A/KDM5B/PHF2/PHF8/KDM1B/JMJD1C/KDM2A/JARID2/KDM7A/KDM4B	13
BP	GO:0008214	protein dealkylation	13/3781	33/18723	0.00883821	0.0667728	0.0542167	KDM3B/KDM5A/KDM6A/KDM3A/KDM5B/PHF2/PHF8/KDM1B/JMJD1C/KDM2A/JARID2/KDM7A/KDM4B	13
BP	GO:0010165	response to X-ray	13/3781	33/18723	0.00883821	0.0667728	0.0542167	NIPBL/TP53BP1/ERCC6/XRCC5/BRCC3/NUCKS1/LIG4/MSH2/ATM/BRCA2/CCND1/XRRA1/GATA3	13
BP	GO:0045648	positive regulation of erythrocyte differentiation	13/3781	33/18723	0.00883821	0.0667728	0.0542167	ARNT/MAPK14/PRKDC/ACVR1B/SMAP1/STAT3/KAT7/ABCB10/FOXO3/MED1/STAT5B/INHBA/ISG15	13
BP	GO:0061842	microtubule organizing center localization	13/3781	33/18723	0.00883821	0.0667728	0.0542167	DLG1/PAFAH1B1/KIF5B/RANBP2/DYNC1LI2/TBCCD1/AKAP9/NIN/NDE1/PARD3B/SYNE2/ASPM/MISP	13
BP	GO:0045137	development of primary sexual characteristics	61/3781	227/18723	0.00889624	0.0671291	0.054506	ATRX/WDR48/SIRT1/UBE3A/KDM5A/ARID4A/TMF1/CRKL/NCOA4/NRIP1/SMAD4/ZFX/WDR19/BCL2L11/RNF38/CTNNA1/RRM1/FNDC3A/ACVR1B/AGO4/NCOA1/CBL/CSDE1/HSD17B4/SGPL1/MSH2/FOXO3/NUP107/BCL2L2/SIX4/HMGCS1/BCL2/TIPARP/PATZ1/KITLG/STAT5B/DACH1/BRCA2/CCND1/ESR1/TGFBR1/RHOBTB3/ARRB1/ARID5B/GATA3/PGR/SLIT2/AR/BRIP1/INHBA/TLR3/LRP2/PDGFRB/WNT5A/CITED2/NR2F2/TGFB2/ASPM/RARA/SLIT3/BMPR1B	61
BP	GO:0022612	gland morphogenesis	35/3781	118/18723	0.0090763	0.0684043	0.0555414	CUL3/FEM1B/BTBD7/DAG1/KDM5B/FRS2/NOTCH2/BTRC/GLI3/TWSG1/MED1/SEMA3C/BCL2/DDR1/ESR1/XBP1/TBX3/PGR/AR/FOXA1/LAMA5/SULF1/WNT5A/TGFB3/TGFB2/NTN4/FGF1/FGFR2/IGFBP5/SLC9A3R1/TNC/AREG/HPN/TP63/FGF10	35
BP	GO:0021987	cerebral cortex development	34/3781	114/18723	0.00916647	0.0689698	0.0560005	NF1/CELF1/GSK3B/PAFAH1B1/CEP120/CRKL/TSC1/CTNNB1/ZMIZ1/NARS1/BBS2/PSEN1/CRK/NCOA1/SLC38A2/DIXDC1/NDE1/GLI3/BBS4/GART/FBXO45/EFHC1/BTBD3/GNG12/SLIT2/PTPRS/TACC1/LRP1/ASPM/BMERB1/COL3A1/NTRK2/ASCL1/CNTNAP2	34
BP	GO:0006360	transcription by RNA polymerase I	19/3781	55/18723	0.00917365	0.0689698	0.0560005	TAF1/BAZ2A/ERCC6/MTOR/RRN3/UTP15/POLR1A/IPPK/HEATR1/ZMPSTE24/GTF2H1/DHX33/PHF8/TAF1B/TAF1A/EIF2AK3/WDR43/NOL11/ERBB2	19
BP	GO:0097581	lamellipodium organization	28/3781	90/18723	0.00934968	0.0702078	0.0570057	TWF1/MTOR/NCKAP1/ABI2/FER/ATP7A/RREB1/PIK3CA/CYFIP1/SNX2/ITGB1/GOLPH3/OCLN/ACTR2/AKIRIN1/CARMIL1/WASF2/SNX1/SPATA13/VCL/VAV2/VAV3/CDH13/ARHGEF6/PIK3R1/SLIT2/ABLIM1/ABLIM3	28
BP	GO:0045197	establishment or maintenance of epithelial cell apical/basal polarity	16/3781	44/18723	0.00945024	0.0707909	0.0574791	ERBIN/PDCD6IP/DLG1/PRKCI/DLG5/MYO9A/SYNJ2BP/LIN7C/OPHN1/TTC8/PARD3B/MTCL1/WNT5A/FAT1/LIN7A/SLC9A3R1	16
BP	GO:0048806	genitalia development	16/3781	44/18723	0.00945024	0.0707909	0.0574791	NIPBL/PTPN11/CTNNB1/PKD1/ESR1/GREB1L/TBX3/AR/LGR4/DHCR24/CHD7/LRP2/WNT5A/SYCP2/TP63/FGF10	16
BP	GO:0006929	substrate-dependent cell migration	10/3781	23/18723	0.00954319	0.070971	0.0576254	CD2AP/EPB41L5/ANKS1A/OPHN1/SHTN1/ITGA2/STK4/SLIT2/FN1/ITGA11	10
BP	GO:0045943	positive regulation of transcription by RNA polymerase I	10/3781	23/18723	0.00954319	0.070971	0.0576254	MTOR/UTP15/IPPK/HEATR1/DHX33/PHF8/EIF2AK3/WDR43/NOL11/ERBB2	10
BP	GO:0051383	kinetochore organization	10/3781	23/18723	0.00954319	0.070971	0.0576254	SENP6/CENPC/RNF4/SMC2/POGZ/MIS12/SMC4/KNTC1/CENPE/CENPF	10
BP	GO:0051904	pigment granule transport	10/3781	23/18723	0.00954319	0.070971	0.0576254	ARL6/BLOC1S6/BBS2/BBS7/RAB11A/BBS4/RAB27B/MYO5A/MREG/MLPH	10
BP	GO:0060487	lung epithelial cell differentiation	10/3781	23/18723	0.00954319	0.070971	0.0576254	CREB1/GRHL2/SAV1/YAP1/THRB/FOXA1/AGR2/ASCL1/FGF10/SPDEF	10
BP	GO:2000737	negative regulation of stem cell differentiation	10/3781	23/18723	0.00954319	0.070971	0.0576254	REST/HNRNPU/CDK13/STAT3/HSPA9/NFE2L2/CDK12/N4BP2L2/YAP1/ZFP36L2	10
BP	GO:0042593	glucose homeostasis	68/3781	258/18723	0.00958918	0.0712273	0.0578335	SIN3A/SIRT1/PTPN11/RAF1/WDR35/HECTD4/MBD5/OPA1/KIF5B/RAB11FIP2/OSBP/ZNF236/STXBP3/HMGCR/CCDC186/PPP3CB/PIK3CA/APPL2/CRY1/NUCKS1/STAT3/SELENOT/CYB5R4/STXBP4/FOXO3/HK1/ADIPOR2/IRS1/PDK3/PFKM/GCLC/IGF1R/UNC13B/GCLM/INSR/PDK2/CRY2/PRKCE/SLC39A14/WFS1/KLF7/ANO1/HK2/ERN1/PIK3R1/SOX4/XBP1/PPP3CA/LEPR/PRKAA1/ADGRF5/PRKAA2/FOXA1/KCNJ11/TIAM1/GPR27/SYBU/ABCG1/CYBA/LRP1/SESN3/ABCC8/IGFBP5/CAMK2N1/PDK4/BAIAP…	68
BP	GO:0043551	regulation of phosphatidylinositol 3-kinase activity	20/3781	59/18723	0.00960749	0.0712776	0.0578744	PIK3R4/SOCS4/RUBCN/AMBRA1/ATG14/SOCS6/SOCS5/PTK2/SOCS7/VAV2/IRS1/VAV3/PIK3R1/PIK3R3/SOCS1/PDGFRB/TEK/FGFR3/FLT3/CCL19	20
BP	GO:0099504	synaptic vesicle cycle	50/3781	181/18723	0.00975997	0.0723221	0.0587224	PREPL/KIAA1109/ROCK1/AP3B1/CLCN3/GSK3B/BLOC1S6/ATP2A2/FCHO2/SNAP23/BTBD9/PPP3CB/CTNNB1/RAB3GAP1/SYNJ1/CYFIP1/FMR1/DNM1L/CANX/PSEN1/ITSN2/OPHN1/RAP1B/ITSN1/VAMP4/SYNJ2/SNAP29/BTBD8/PCLO/RAB27B/CASK/BACE1/PTEN/UNC13B/CTBP2/FBXL20/STXBP5/RAPGEF4/NAPB/CADPS2/SLC4A8/STXBP1/RIMS4/DNAJC6/AMPH/SYT7/ADCY1/SYT9/STON2/SYT1	50
BP	GO:0062197	cellular response to chemical stress	86/3781	337/18723	0.00979165	0.0724699	0.0588425	REST/LANCL1/SIN3A/DDX3X/ATF2/CHUK/SIRT1/PTPN11/PRKRA/SLC25A24/ADNP2/CHD6/UBQLN1/IMPACT/ERCC6L2/XRCC5/SETX/OXSR1/ATP2A2/BECN1/FER/ATP7A/ARNT/PNPLA8/MAPK1/MAPK8/BAG5/TSC1/OXR1/PIK3CA/CTNNB1/ABL1/CAMKK2/VKORC1L1/CAB39/GSKIP/EIF2S1/PYROXD1/STAU1/PRDX3/EIF2AK3/MAPK9/NFE2L2/PDCD10/ECT2/ERMP1/ARNTL/PAWR/FOXO3/NFE2L1/STK24/CPEB2/PARP1/PKD2/ATM/SLC12A6/MDM2/BCL2/VRK2/DHFR/FUT8/MYB/STK39/TP53INP1/ABCC1/PDK…	86
BP	GO:0051302	regulation of cell division	49/3781	177/18723	0.0100084	0.0738816	0.0599887	PIK3R4/CUL3/SETD2/PRPF40A/PKN2/CCP110/BIRC6/PIK3C3/KIF3B/RBL2/INTU/BECN1/SPAST/CHMP3/ZFYVE26/PKP4/AHCTF1/KLHL9/KIF13A/NCOA3/KIF20B/ECT2/RAB11A/BBS4/MAP9/CAT/EFHC1/PRKCE/RACGAP1/BRCA2/RAB11FIP4/SVIL/CDC14A/PDGFC/INCENP/RBL1/RAB11FIP3/MLLT3/PLK4/E2F7/PDGFD/PLK2/TGFB3/TGFB2/ASPM/FGF1/FGFR2/THBS4/TP63	49
BP	GO:0033120	positive regulation of RNA splicing	14/3781	37/18723	0.0100422	0.0738816	0.0599887	THRAP3/NUP98/SETX/POLR2A/SRSF1/NCBP1/DYRK1A/RBM22/RBMXL1/HNRNPLL/SLC38A2/HSPA8/ERN1/PIK3R1	14
BP	GO:0048009	insulin-like growth factor receptor signaling pathway	14/3781	37/18723	0.0100422	0.0738816	0.0599887	GIGYF2/PHIP/EIF2AK3/IGF2R/IRS1/CRIM1/IGF1R/PIK3R1/AR/MYORG/GHR/IGFBP5/IGFBP2/CILP	14
BP	GO:0051294	establishment of spindle orientation	14/3781	37/18723	0.0100422	0.0738816	0.0599887	FBXW11/UBXN2B/CLASP1/PAFAH1B1/DCTN1/HTT/ITGB1/CDK5RAP2/NDE1/NUMA1/LLGL1/GJA1/MISP/FGF10	14
BP	GO:1904358	positive regulation of telomere maintenance via telomere lengthening	14/3781	37/18723	0.0100422	0.0738816	0.0599887	DHX36/POT1/TNKS2/XRCC5/ATR/TNKS/MAPK1/CTNNB1/NEK7/NAF1/MAP3K4/ATM/CCT2/PKIB	14
BP	GO:0033673	negative regulation of kinase activity	63/3781	237/18723	0.0101674	0.0744628	0.0604606	NF1/IPO7/APC/IBTK/SIRT1/HNRNPU/SMCR8/SOCS4/LATS1/PRKAR2A/WNK1/PDPK1/GGNBP2/RUBCN/PRKAR1A/PAK2/HIPK3/HMGCR/AIDA/SNX6/PIK3CB/ABL1/ZNF675/ADAR/GSKIP/SOCS5/PSEN1/TSG101/CBL/PRDX3/LRP6/PIP4K2C/IPO5/YWHAG/CEP85/INCA1/RB1/GNAQ/DUSP3/PIP4K2B/COX11/PTEN/SORL1/PAQR3/NCAPG2/PPP2R5A/PTPN1/SPRED1/CDKN1B/SH3BP5/HEG1/PTPRT/MAPT/PRKAR2B/MAPK8IP1/PDCD4/NR2F2/DEPTOR/GPRC5A/SRCIN1/APOE/CAMK2N1/PKIB	63
BP	GO:0010569	regulation of double-strand break repair via homologous recombination	17/3781	48/18723	0.0101783	0.0744628	0.0604606	SETD2/TP53BP1/ARID2/WDR48/RIF1/ERCC6/PPP4R2/SHLD2/SMCHD1/ACTR2/KLHL15/SPIDR/PARP1/FIGNL1/HELB/UBQLN4/TIMELESS	17
BP	GO:0048146	positive regulation of fibroblast proliferation	17/3781	48/18723	0.0101783	0.0744628	0.0604606	DHX9/WAPL/PRKDC/ZMIZ1/LIG4/CTC1/MYB/ESR1/BMI1/FOSL2/PDGFC/PDGFD/DDR2/PDGFRB/WNT5A/FN1/FGF10	17
BP	GO:0000132	establishment of mitotic spindle orientation	12/3781	30/18723	0.0102055	0.0744628	0.0604606	FBXW11/UBXN2B/PAFAH1B1/DCTN1/HTT/ITGB1/CDK5RAP2/NDE1/NUMA1/GJA1/MISP/FGF10	12
BP	GO:0046825	regulation of protein export from nucleus	12/3781	30/18723	0.0102055	0.0744628	0.0604606	CTDSPL2/PTPN11/XPO1/UHMK1/TPR/GSK3B/XPO4/RBM22/DNAJC27/BARD1/MDM2/PTPN14	12
BP	GO:0060218	hematopoietic stem cell differentiation	12/3781	30/18723	0.0102055	0.0744628	0.0604606	ITCH/XRCC5/UFL1/CHD2/ABL1/PRKDC/HSPA9/NFE2L2/EIF2AK2/N4BP2L2/PUS7/MLLT3	12
BP	GO:0060603	mammary gland duct morphogenesis	12/3781	30/18723	0.0102055	0.0744628	0.0604606	KDM5B/BTRC/MED1/DDR1/ESR1/TBX3/PGR/AR/WNT5A/FGFR2/AREG/FGF10	12
BP	GO:0009880	embryonic pattern specification	22/3781	67/18723	0.0102617	0.0746964	0.0606502	SMAD5/TASOR/SMAD4/EPB41L5/SMAD2/CTNNB1/FRS2/C2CD3/SMAD1/SMAD3/PCSK6/PGAP1/ERBB4/TBX3/SEMA3F/STIL/CXXC4/TDRD5/WNT5A/COBL/FGFR2/FGF10	22
BP	GO:0061180	mammary gland epithelium development	22/3781	67/18723	0.0102617	0.0746964	0.0606502	LATS1/MAPK1/KDM5B/RREB1/BTRC/MED1/DDR1/ERBB4/BRCA2/CCND1/ESR1/IRF6/TBX3/GATA3/PGR/AR/WNT3/WNT5A/FGFR2/ZNF703/AREG/FGF10	22
BP	GO:0030282	bone mineralization	35/3781	119/18723	0.0104164	0.0757336	0.0614924	NBR1/BMPR2/ZMPSTE24/BCOR/ATP2B1/TXLNG/ACVR2B/ZBTB40/ANO6/BMPR1A/MINPP1/EIF2AK3/ACVR1/BMP2K/KLF10/SMAD3/ENPP1/TUFT1/AXIN2/TFAP2A/LGR4/ADGRV1/DDR2/SGMS2/TGFB3/FGFR2/BMPR1B/GREM1/LOX/OMD/COL1A2/ASPN/FGFR3/GPC3/ISG15	35
BP	GO:0072078	nephron tubule morphogenesis	23/3781	71/18723	0.0104952	0.0762169	0.0618849	DLG1/GZF1/SMAD4/CTNNB1/PBX1/FMN1/GLI3/SIX4/DCHS1/PKD2/AHI1/BCL2/PKD1/NPNT/GREB1L/GATA3/LGR4/LAMA5/WNK4/FGF1/GREM1/GPC3/SIX1	23
BP	GO:0030278	regulation of ossification	34/3781	115/18723	0.0105452	0.0764901	0.0621067	NIPBL/PTPN11/INTU/NBR1/BMPR2/MAPK1/ZMPSTE24/MAPK14/BCOR/ATP2B1/TXLNG/ACVR2B/PBX1/ANO6/BMPR1A/TOB2/ACVR1/BMP2K/SMAD3/BCL2/CHSY1/ENPP1/TFAP2A/ADGRV1/DDR2/SGMS2/WNT5A/TGFB3/TGFB2/BMPR1B/GREM1/OMD/MKX/ISG15	34
BP	GO:0031345	negative regulation of cell projection organization	51/3781	186/18723	0.0105944	0.07666	0.0622446	CEP97/CCP110/UBE3A/DIP2B/THOC2/PAFAH1B1/BAG5/TSC1/DENND5A/CERS2/PTPN9/CBFA2T2/RAPGEF2/RYK/LRIG2/RNF6/PSEN1/ADCY6/ULK2/TRAK2/SEMA4F/PTPRG/PTEN/SEMA3C/MDM2/SYNGAP1/INPP5F/PAQR3/MYLIP/YAP1/FKBP4/SEMA5A/SPART/PPP3CA/SEMA3F/SLIT2/LPAR1/SEMA4B/PTPRS/WNT3/INPP5J/RTN4RL1/SEMA6D/ITGA3/WNT5A/SPOCK1/LRP1/EVL/APOE/SEMA3E/SEMA3B	51
BP	GO:0120032	regulation of plasma membrane bounded cell projection assembly	51/3781	186/18723	0.0105944	0.07666	0.0622446	APC/CEP97/CCP110/WASL/TWF1/MTOR/NCKAP1/FNBP1L/ABI2/CEP120/ARHGAP35/FER/ATP7A/CEP135/PIK3CA/HTT/CYFIP1/EPS8/FMR1/FXR1/SEPTIN7/ATMIN/OCLN/ATP8B1/SDCCAG8/ACTR2/DYNC2LI1/IFT88/BBS4/AKIRIN1/WASF2/TAPT1/CDKL5/PPP1R9A/BCAS3/ZMYND8/YAP1/IFT140/MNS1/TGFBR1/RDX/PIK3R1/SLIT2/PODXL/ZMYND10/DCDC2/TGFB3/EVL/COBL/NEURL1/CCL19	51
BP	GO:0032211	negative regulation of telomere maintenance via telomerase	9/3781	20/18723	0.0106059	0.07666	0.0622446	HNRNPU/POT1/DCP2/EXOSC10/XRN1/TERF1/GNL3L/CTC1/TENT4B	9
BP	GO:0061333	renal tubule morphogenesis	24/3781	75/18723	0.0106748	0.0770678	0.0625758	DLG1/GZF1/SMAD4/CTNNB1/PBX1/FMN1/GLI3/SIX4/DCHS1/PKD2/AHI1/BCL2/PKD1/NPNT/GREB1L/GATA3/LGR4/LAMA5/MTSS1/WNK4/FGF1/GREM1/GPC3/SIX1	24
BP	GO:0007229	integrin-mediated signaling pathway	32/3781	107/18723	0.0107614	0.0774723	0.0629042	CUL3/ERBIN/PTPN11/ZNF304/PHACTR4/CTNNA1/PTPRA/ABL1/ADAM10/ITGB1/PTK2/DOCK1/ITGAV/ITGA2/FUT8/VAV3/DST/ADAM9/SLC2A10/LAMA3/FERMT2/LAMA5/EMP2/ITGB5/ITGA3/FN1/ITGBL1/FYB2/ITGA6/COL3A1/ITGA11/ISG15	32
BP	GO:0031103	axon regeneration	18/3781	52/18723	0.0107957	0.0774723	0.0629042	DAG1/MTR/CTNNA1/CERS2/LRIG2/PTPRF/STK24/PTEN/BCL2/INPP5F/JAM3/DHFR/PTPRS/LAMB2/MAP1B/RTN4RL1/LRP1/TNC	18
BP	GO:0032206	positive regulation of telomere maintenance	18/3781	52/18723	0.0107957	0.0774723	0.0629042	ATRX/DHX36/POT1/TNKS2/XRCC5/ATR/TNKS/MAPK1/NBN/CTNNB1/SLX4/NEK7/NAF1/MRE11/MAP3K4/ATM/CCT2/PKIB	18
BP	GO:0035176	social behavior	18/3781	52/18723	0.0107957	0.0774723	0.0629042	CHD8/MTOR/ATXN1L/VPS13A/MECP2/EIF4EBP2/PCM1/ATXN1/RPTOR/CIC/PTEN/SHANK2/GRPR/CX3CR1/SLC6A4/EN1/OXTR/CNTNAP2	18
BP	GO:0048260	positive regulation of receptor-mediated endocytosis	18/3781	52/18723	0.0107957	0.0774723	0.0629042	HNRNPK/WASL/TBC1D5/SCYL2/HIP1/SYNJ1/FMR1/RAB21/ATAD1/CBL/AHI1/INSR/PPT1/DGKD/ARRB1/HFE/GREM1/CCL19	18
BP	GO:0014068	positive regulation of phosphatidylinositol 3-kinase signaling	25/3781	79/18723	0.010806	0.0774723	0.0629042	SIRT1/UBE3A/BECN1/CBL/NEDD4/PTK2/ERBB3/MAZ/CAT/IGF1R/INSR/ERBB4/PDGFC/HCST/F2R/UNC5B/PDGFD/FGFR1/PDGFRB/FN1/TEK/TGFB2/NTRK2/CCL5/FLT3	25
BP	GO:0048017	inositol lipid-mediated signaling	50/3781	182/18723	0.0108766	0.0778879	0.0632416	PIK3C2A/NF1/EXOC1/SIRT1/UBE3A/PIK3C3/BECN1/PI4KA/PIK3CA/PIK3CB/KBTBD2/PIP5K1A/CBL/NEDD4/PTK2/PTPN13/OGT/FBXL2/ERBB3/PTEN/IRS1/MAZ/CAT/INPP5F/IGF1R/RPS6KB1/INSR/ERBB4/ENTPD5/PDGFC/HCST/PLCD4/PIK3R1/F2R/UNC5B/GATA3/PDGFD/FGFR1/PDGFRB/FN1/TEK/GAB2/PLCL1/TGFB2/SLC9A3R1/NTRK2/CCL5/CA8/FLT3/ERBB2	50
BP	GO:0051492	regulation of stress fiber assembly	28/3781	91/18723	0.0109606	0.0783984	0.0636561	CLASP2/ROCK1/ALMS1/MTOR/CLASP1/PAK2/TSC1/ABL1/TJP1/TTC8/ROCK2/CARMIL1/WASF2/PPFIA1/BAG4/PPP1R9A/SMAD3/TGFBR1/PHLDB2/PIK3R1/RHPN2/FERMT2/LPAR1/SDC4/CGNL1/TGFB3/EVL/LIMCH1	28
BP	GO:0048286	lung alveolus development	15/3781	41/18723	0.0110841	0.0791906	0.0642993	CREB1/RC3H2/BMPR2/MAN1A2/ATP7A/ATXN1L/ASXL1/PTGES3/MAN2A1/PGR/FOXA1/TGFB3/FGFR2/IGFBP5/FGF10	15
BP	GO:0030166	proteoglycan biosynthetic process	19/3781	56/18723	0.0113113	0.0806273	0.0654659	BMPR2/FAM20B/CTNNB1/EXTL2/GLCE/CSGALNACT2/HS2ST1/NDST1/PXYLP1/CANT1/CHSY1/CHST15/UGDH/XYLT1/SLC2A10/DSEL/CHST10/HS6ST3/BMPR1B	19
BP	GO:0051058	negative regulation of small GTPase mediated signal transduction	19/3781	56/18723	0.0113113	0.0806273	0.0654659	CUL3/SCAI/RASA1/ARHGAP35/CD2AP/ITGB1/ARHGAP12/ABL2/TNFAIP1/SYNGAP1/CCDC125/PPP2CB/HEG1/ARHGAP42/SLIT2/CGNL1/ITGA3/TGFB2/FBP1	19
BP	GO:0048545	response to steroid hormone	86/3781	339/18723	0.0114358	0.0814206	0.06611	REST/USP8/ARID1A/CLOCK/SIRT1/HNRNPU/UBE3A/UBR5/LATS1/EP300/STRN3/KMT2D/TMF1/NCOA2/EIF4E/NCOR1/CNOT1/KDM3A/UFL1/NCOA4/BCL2L11/FECH/DDX17/ATP2B1/CRY1/RNF14/RBFOX2/ZMIZ1/UFSP2/RNF6/KRAS/ABHD2/NCOA1/NEDD4/PTGES3/AGL/ARNTL/ATP1A1/FOXO3/PARP1/BRCA1/MED1/THBS1/MDM2/BCL2/PGRMC2/NPC1/ALAD/NCOR2/YAP1/CALCOCO1/CRY2/KANK2/ADAM9/ABCA2/CCND1/ESR1/NR3C1/BMI1/TRERF1/ABCA3/PGR/SLIT2/KLF9/AR/FOXA1/ZFP36L2/EGLN2/GH…	86
BP	GO:0008406	gonad development	59/3781	221/18723	0.0114498	0.0814264	0.0661147	ATRX/WDR48/SIRT1/UBE3A/KDM5A/ARID4A/TMF1/CRKL/NCOA4/NRIP1/SMAD4/ZFX/WDR19/BCL2L11/RNF38/CTNNA1/RRM1/FNDC3A/AGO4/NCOA1/CBL/CSDE1/HSD17B4/SGPL1/MSH2/FOXO3/NUP107/BCL2L2/SIX4/HMGCS1/BCL2/TIPARP/PATZ1/KITLG/STAT5B/BRCA2/CCND1/ESR1/TGFBR1/RHOBTB3/ARRB1/ARID5B/GATA3/PGR/SLIT2/AR/BRIP1/INHBA/TLR3/LRP2/PDGFRB/WNT5A/CITED2/NR2F2/TGFB2/ASPM/RARA/SLIT3/BMPR1B	59
BP	GO:0008334	histone mRNA metabolic process	8/3781	17/18723	0.0115638	0.0816737	0.0663156	DCP2/CPSF2/TENT2/LSM11/EXOSC10/XRN1/TENT4B/ATM	8
BP	GO:0031573	mitotic intra-S DNA damage checkpoint signaling	8/3781	17/18723	0.0115638	0.0816737	0.0663156	ATF2/RAD17/XPC/MRE11/MDC1/MSH2/NEK11/FANCD2	8
BP	GO:0048339	paraxial mesoderm development	8/3781	17/18723	0.0115638	0.0816737	0.0663156	NUP133/EXOC4/EPB41L5/SMAD2/BMPR1A/SMAD3/YAP1/WNT5A	8
BP	GO:0060977	coronary vasculature morphogenesis	8/3781	17/18723	0.0115638	0.0816737	0.0663156	SEC24B/SETD2/ARID2/SPRED1/TGFBR1/LRP2/PDGFRB/TGFBR3	8
BP	GO:1900034	regulation of cellular response to heat	8/3781	17/18723	0.0115638	0.0816737	0.0663156	SIRT1/CREBBP/EP300/MTOR/GSK3B/ATR/ATM/MAPT	8
BP	GO:1903830	magnesium ion transmembrane transport	8/3781	17/18723	0.0115638	0.0816737	0.0663156	ZDHHC17/CNNM4/NIPA2/MAGT1/MMGT1/NIPA1/NIPAL3/SLC41A1	8
BP	GO:1903532	positive regulation of secretion by cell	73/3781	282/18723	0.0116363	0.0820914	0.0666547	CREB1/CLASP2/SNX4/EXOC1/PTPN11/VPS4B/PDCD6IP/CLASP1/KIF5B/TMF1/OSBP/AP1G1/CD2AP/SMAD4/PPP3CB/PPID/RAB3GAP1/MYH10/STAM/DNM1L/TSG101/GOLPH3/SELENOT/RAB2B/ITSN1/TMED10/SYTL4/RAB3D/RAB27B/GLUD1/TM7SF3/PFKM/SLC12A2/UNC13B/GOLPH3L/ILDR1/MYB/STXBP5/PRKCE/RAB8B/ADAM9/MYRIP/GLUL/ABAT/ANO1/CADPS2/MYO18A/SOX4/SLC4A8/STXBP1/GJA1/SDC4/HFE/GPR27/INHBA/SYBU/ABCG1/SYT7/GAB2/TGFB3/LRP1/TGFB2/SYT9/HLA-F/WLS/CAMK2N…	73
BP	GO:0032212	positive regulation of telomere maintenance via telomerase	13/3781	34/18723	0.0117133	0.0821032	0.0666642	POT1/TNKS2/XRCC5/ATR/TNKS/MAPK1/CTNNB1/NEK7/NAF1/MAP3K4/ATM/CCT2/PKIB	13
BP	GO:0048536	spleen development	13/3781	34/18723	0.0117133	0.0821032	0.0666642	RC3H2/ADAM17/BCL2L11/ABL1/PBX1/PRKDC/RC3H1/CTC1/FLVCR1/BCL2/JARID2/CITED2/FGF10	13
BP	GO:2000758	positive regulation of peptidyl-lysine acetylation	13/3781	34/18723	0.0117133	0.0821032	0.0666642	DIP2B/PAXIP1/GLYR1/SMAD4/KAT7/RPS6KA5/TADA2B/BRCA1/ARRB1/SOX4/PRKAA1/GATA3/PRKAA2	13
BP	GO:2000780	negative regulation of double-strand break repair	13/3781	34/18723	0.0117133	0.0821032	0.0666642	TP53BP1/RIF1/TRIP12/UBR5/ERCC6/RNF169/SHLD2/SMCHD1/TFIP11/KLHL15/OTUB2/HELB/UBQLN4	13
BP	GO:0003171	atrioventricular valve development	11/3781	27/18723	0.0117442	0.0821032	0.0666642	BMPR2/SMAD4/BMPR1A/ACVR1/DCHS1/MDM2/MDM4/SOX4/TGFB2/SLIT3/OLFM1	11
BP	GO:0010586	miRNA metabolic process	11/3781	27/18723	0.0117442	0.0821032	0.0666642	DROSHA/RC3H2/TENT2/DDX17/DICER1/RC3H1/TUT7/AGO4/TENT4B/NFKB1/AGO2	11
BP	GO:0035459	vesicle cargo loading	11/3781	27/18723	0.0117442	0.0821032	0.0666642	SEC24B/SEC24C/SEC24A/KIF13A/SEC23B/SEC31A/TMED10/SEC24D/SEC23A/MIA2/MIA3	11
BP	GO:0060512	prostate gland morphogenesis	11/3781	27/18723	0.0117442	0.0821032	0.0666642	FEM1B/FRS2/ESR1/AR/FOXA1/SULF1/WNT5A/FGFR2/TNC/TP63/FGF10	11
BP	GO:0030835	negative regulation of actin filament depolymerization	16/3781	45/18723	0.0119714	0.0831685	0.0675293	TWF1/CAPZA2/MTPN/PIK3CA/ADD1/EPS8/TMOD3/SPTAN1/LIMA1/SPTBN1/CARMIL1/SWAP70/CRACD/SVIL/RDX/ADD3	16
BP	GO:0044088	regulation of vacuole organization	16/3781	45/18723	0.0119714	0.0831685	0.0675293	SMCR8/RAB3GAP2/TBC1D14/PIKFYVE/TMEM106B/UBQLN2/BECN1/TBC1D12/RAB3GAP1/MTM1/SCARB2/IFT88/PIP4K2C/PIP4K2B/SEC22B/ELAPOR1	16
BP	GO:0045216	cell-cell junction organization	54/3781	200/18723	0.0119993	0.0831685	0.0675293	APC/PKN2/HIPK1/ROCK1/PDCD6IP/DLG1/STRN/PRKCI/MPDZ/PAK2/DLG5/GRHL2/MARVELD2/CTNNA1/CTNNB1/PATJ/ADAM10/ADD1/PKP4/PLEKHA7/TJP1/OCLN/DSG2/MTDH/ECT2/ROCK2/VCL/DCHS1/AFDN/SMAD3/JAM3/MPP7/TLN2/IKBKB/PKP2/PARD6B/DSP/TGFBR1/RDX/F2R/HEG1/FERMT2/GJA1/MTSS1/CDH11/CDH1/CTNND2/GRHL1/TGFB3/TGFB2/ABCC8/ZNF703/SVEP1/CNTNAP2	54
BP	GO:0036293	response to decreased oxygen levels	82/3781	322/18723	0.0120505	0.0831685	0.0675293	CREB1/REST/NF1/SIRT1/RAF1/APAF1/CREBBP/UBQLN1/EP300/OPA1/MTOR/HIF1AN/BECN1/ATP7A/ARNT/NPEPPS/SMAD4/ADAM17/TSC1/TM9SF4/SLC11A2/DNM1L/USP19/MECP2/CPEB4/HP1BP3/CBL/TMBIM6/BIRC2/EEF2K/NFE2L2/ROCK2/FOXO3/ITGA2/CPEB2/ITPR1/DDAH1/PTEN/PDK3/THBS1/BNIP3L/MDM2/CAT/SMAD3/BACH1/BCL2/MDM4/ALAD/MYB/ARNT2/PRKCE/ITPR2/HIPK2/EDNRA/HYOU1/CDKN1B/ABAT/HK2/PRKAA1/PMAIP1/POSTN/BRIP1/PLOD2/STC2/EGLN2/STOX1/CYBA/CITED2/…	82
BP	GO:1903051	negative regulation of proteolysis involved in cellular protein catabolic process	21/3781	64/18723	0.0120748	0.0831685	0.0675293	TAF1/MARCHF7/USP7/SMARCC1/RYBP/WAC/BAG5/USP19/PSEN1/SUFU/OPHN1/STYX/USP14/OGT/TLK2/SVIP/USP25/ALAD/HIPK2/MAP1A/HFE	21
BP	GO:0006020	inositol metabolic process	6/3781	11/18723	0.0122057	0.0831685	0.0675293	PPIP5K2/IPPK/MECP2/SLC5A3/IMPA1/PPIP5K1	6
BP	GO:0006086	acetyl-CoA biosynthetic process from pyruvate	6/3781	11/18723	0.0122057	0.0831685	0.0675293	DLAT/PDHX/DLD/PDK3/PDK2/PDK4	6
BP	GO:0031442	positive regulation of mRNA 3'-end processing	6/3781	11/18723	0.0122057	0.0831685	0.0675293	DHX36/CDC73/NCBP1/NUDT21/CPEB3/LEO1	6
BP	GO:0032329	serine transport	6/3781	11/18723	0.0122057	0.0831685	0.0675293	SERINC3/SLC38A2/SERINC5/SFXN1/SFXN2/SLC1A4	6
BP	GO:0033210	leptin-mediated signaling pathway	6/3781	11/18723	0.0122057	0.0831685	0.0675293	SIRT1/BBS2/STAT3/BBS4/UGCG/LEPR	6
BP	GO:0051657	maintenance of organelle location	6/3781	11/18723	0.0122057	0.0831685	0.0675293	PAFAH1B1/TBCCD1/AKAP9/POLR2M/ARHGAP21/ASPM	6
BP	GO:0060742	epithelial cell differentiation involved in prostate gland development	6/3781	11/18723	0.0122057	0.0831685	0.0675293	FEM1B/CTNNB1/AR/FOXA1/FGFR2/TP63	6
BP	GO:0070601	centromeric sister chromatid cohesion	6/3781	11/18723	0.0122057	0.0831685	0.0675293	CTCF/CTNNB1/NAA50/SGO2/AXIN2/BUB1B	6
BP	GO:0071044	histone mRNA catabolic process	6/3781	11/18723	0.0122057	0.0831685	0.0675293	DCP2/TENT2/EXOSC10/XRN1/TENT4B/ATM	6
BP	GO:0098935	dendritic transport	6/3781	11/18723	0.0122057	0.0831685	0.0675293	HNRNPU/KIF3B/KIF5B/PURA/TRAK2/KIF5C	6
BP	GO:2000644	regulation of receptor catabolic process	6/3781	11/18723	0.0122057	0.0831685	0.0675293	ITCH/MYLIP/DTX3L/PTPN1/ABCA2/APOE	6
BP	GO:2000786	positive regulation of autophagosome assembly	6/3781	11/18723	0.0122057	0.0831685	0.0675293	RAB3GAP2/BECN1/RAB3GAP1/PIP4K2C/PIP4K2B/ELAPOR1	6
BP	GO:0007175	negative regulation of epidermal growth factor-activated receptor activity	7/3781	14/18723	0.0122196	0.0831685	0.0675293	SOCS4/SNX6/SOCS5/PSEN1/TSG101/CBL/GPRC5A	7
BP	GO:0010457	centriole-centriole cohesion	7/3781	14/18723	0.0122196	0.0831685	0.0675293	KIF3A/CEP44/CEP68/CEP135/DCTN1/CTNNB1/NIN	7
BP	GO:0033169	histone H3-K9 demethylation	7/3781	14/18723	0.0122196	0.0831685	0.0675293	KDM3B/KDM3A/PHF2/PHF8/JMJD1C/KDM7A/KDM4B	7
BP	GO:0035791	platelet-derived growth factor receptor-beta signaling pathway	7/3781	14/18723	0.0122196	0.0831685	0.0675293	HIP1/ABL1/PTPN12/PTPN1/PDGFRB/LRP1/LOX	7
BP	GO:0043558	regulation of translational initiation in response to stress	7/3781	14/18723	0.0122196	0.0831685	0.0675293	IMPACT/EIF2AK4/PPP1R15B/EIF2S1/EIF2AK3/EIF2AK2/DNAJC3	7
BP	GO:0090308	regulation of DNA methylation-dependent heterochromatin assembly	7/3781	14/18723	0.0122196	0.0831685	0.0675293	TASOR/ZNF304/ATF7IP/SETDB1/MPHOSPH8/RESF1/DNMT1	7
BP	GO:0098787	mRNA cleavage involved in mRNA processing	7/3781	14/18723	0.0122196	0.0831685	0.0675293	CPSF6/CPSF2/NCBP1/NUDT21/CSTF2T/CSTF2/ERN1	7
BP	GO:0035601	protein deacylation	33/3781	112/18723	0.0122518	0.0832961	0.0676328	SMARCAD1/REST/SIN3A/NIPBL/SUDS3/SIRT1/KDM5A/BAZ2A/RCOR1/EP300/MIER1/C6orf89/DYRK1A/MAPK8/MIDEAS/TBL1XR1/ELK4/RCOR3/PER2/ABHD13/LYPLA1/SPRED2/ABHD17B/FRY/TBL1X/NCAPG2/PPT1/SPRED1/TRERF1/PRKAA1/MAPT/PRKAA2/SREBF1	33
BP	GO:0034394	protein localization to cell surface	22/3781	68/18723	0.0123407	0.0836246	0.0678996	AP3B1/GBF1/CTNNB1/TM9SF4/LRIG2/PIGK/GOPC/RAB11A/LEPROT/GGA2/VCL/GPD1L/JAM3/NEDD4L/ERBB4/ABCA2/MAP1A/ASTN2/HFE/EMP2/PTPRK/FGF10	22
BP	GO:0060411	cardiac septum morphogenesis	22/3781	68/18723	0.0123407	0.0836246	0.0678996	BMPR2/SMAD4/BMPR1A/NOTCH2/NSD2/SAV1/PARVA/ACVR1/SEMA3C/MDM2/TGFBR1/SOX4/TBX3/SLIT2/CHD7/LRP2/WNT5A/CITED2/TGFB2/SLIT3/FGFR2/TGFBR3	22
BP	GO:0061912	selective autophagy	22/3781	68/18723	0.0123407	0.0836246	0.0678996	WDFY3/ATG2B/SPTLC1/UBQLN1/HUWE1/USP30/AMBRA1/BECN1/UFL1/ATG14/VPS13D/RB1CC1/HTT/TBK1/VPS13C/ULK2/LGALS8/SPTLC2/ATG16L1/CALCOCO2/RETREG1/HSPB8	22
BP	GO:0007517	muscle organ development	83/3781	327/18723	0.0126067	0.0850448	0.0690527	CREB1/FKTN/SIRT1/MRTFB/TCF12/PTCD2/EP300/ZNF609/DAG1/CCNT2/MTPN/HMGCR/SMAD4/KMT5B/MAPK14/BTBD1/CHD2/CTNNB1/DDX17/COPS2/NR1D2/FXR1/USP19/FLNB/BMPR1A/SFMBT1/BCL9/NLN/MEF2A/ZFHX3/PAXBP1/ARNTL/RB1/AKIRIN1/UTRN/SIX4/SGCB/MED1/EVC/SMAD3/BCL2/LARGE1/PKP2/CD164/HIVEP3/HOMER1/DSP/SVIL/TGFBR1/XBP1/HEG1/PPP3CA/ARID5B/PRKAA1/LAMA2/SGCD/LAMA5/MYORG/ZNF689/ZBTB42/CHD7/LRP2/WNT5A/CITED2/MYLK/COL6A3/NR2F2/TGFB2/…	83
BP	GO:0006310	DNA recombination	78/3781	305/18723	0.012675	0.0850448	0.0690527	SMARCAD1/NIPBL/SETD2/TP53BP1/DCAF1/TOP2B/ARID2/WDR48/RIF1/ERCC4/MSH3/ERCC6/INO80/PPP4R2/PALB2/KPNA1/FANCM/ACTR8/XRCC5/PAXIP1/FAN1/SETX/UBR2/MLH3/RECQL/EXD2/TSN/KMT5B/SHLD2/NBN/THAP9/SMC5/ZFYVE26/RMI1/PRKDC/MCM9/SLX4/WRN/MLH1/INO80D/SMCHD1/LIG3/NUCKS1/RPA1/MRE11/MSH6/ACTR2/REV3L/NDFIP1/SUPT6H/LIG4/RNF168/NSD2/NFRKB/MSH2/ACTL6A/KLHL15/SPIDR/PARP1/BRCA1/FIGNL1/HELB/ATM/RFWD3/SWAP70/UBQLN4/TIMELESS/R…	78
BP	GO:0006305	DNA alkylation	24/3781	76/18723	0.012682	0.0850448	0.0690527	ATRX/CTCF/BAZ2A/PRMT5/KMT2E/ATF7IP/ZMPSTE24/RLF/GRHL2/PIK3CA/KMT2A/MECP2/KDM1B/MPHOSPH8/N6AMT1/MTRR/TET3/PARP1/BRCA1/DNMT1/PPM1D/TDRKH/BMI1/TDRD5	24
BP	GO:0006306	DNA methylation	24/3781	76/18723	0.012682	0.0850448	0.0690527	ATRX/CTCF/BAZ2A/PRMT5/KMT2E/ATF7IP/ZMPSTE24/RLF/GRHL2/PIK3CA/KMT2A/MECP2/KDM1B/MPHOSPH8/N6AMT1/MTRR/TET3/PARP1/BRCA1/DNMT1/PPM1D/TDRKH/BMI1/TDRD5	24
BP	GO:0014855	striated muscle cell proliferation	24/3781	76/18723	0.012682	0.0850448	0.0690527	ARID2/KPNA1/PRKAR1A/MAPK1/MAPK14/VGLL4/BMPR1A/STAT3/SMAD1/PAXBP1/AKIRIN1/SAV1/PTEN/JARID2/YAP1/RUNX1/ERBB4/TGFBR1/GJA1/CITED2/TGFB2/FGFR2/TGFBR3/SIX1	24
BP	GO:0002204	somatic recombination of immunoglobulin genes involved in immune response	17/3781	49/18723	0.0127154	0.0850448	0.0690527	TP53BP1/RIF1/PAXIP1/KMT5B/SHLD2/NBN/MLH1/MSH6/NDFIP1/SUPT6H/LIG4/RNF168/NSD2/MSH2/SWAP70/TFRC/TNFSF13	17
BP	GO:0002208	somatic diversification of immunoglobulins involved in immune response	17/3781	49/18723	0.0127154	0.0850448	0.0690527	TP53BP1/RIF1/PAXIP1/KMT5B/SHLD2/NBN/MLH1/MSH6/NDFIP1/SUPT6H/LIG4/RNF168/NSD2/MSH2/SWAP70/TFRC/TNFSF13	17
BP	GO:0045190	isotype switching	17/3781	49/18723	0.0127154	0.0850448	0.0690527	TP53BP1/RIF1/PAXIP1/KMT5B/SHLD2/NBN/MLH1/MSH6/NDFIP1/SUPT6H/LIG4/RNF168/NSD2/MSH2/SWAP70/TFRC/TNFSF13	17
BP	GO:0045778	positive regulation of ossification	17/3781	49/18723	0.0127154	0.0850448	0.0690527	NIPBL/PTPN11/BMPR2/ATP2B1/ACVR2B/ANO6/BMPR1A/TOB2/ACVR1/SMAD3/TFAP2A/ADGRV1/WNT5A/TGFB3/TGFB2/BMPR1B/ISG15	17
BP	GO:0070849	response to epidermal growth factor	17/3781	49/18723	0.0127154	0.0850448	0.0690527	PTPN11/TPR/PDPK1/BECN1/MAPK1/IQGAP1/SNX6/PTPN12/CBL/DUSP3/BAG4/MED1/STAT5B/ERBB4/ZFP36L2/ERBB2/ASCL1	17
BP	GO:1901799	negative regulation of proteasomal protein catabolic process	17/3781	49/18723	0.0127154	0.0850448	0.0690527	MARCHF7/USP7/SMARCC1/RYBP/WAC/BAG5/USP19/OPHN1/STYX/USP14/OGT/TLK2/SVIP/USP25/ALAD/MAP1A/HFE	17
BP	GO:1990928	response to amino acid starvation	17/3781	49/18723	0.0127154	0.0850448	0.0690527	LARS1/IMPACT/MTOR/EIF2AK4/BECN1/MAPK1/MAPK8/GCN1/LARP1/MIOS/EIF2S1/SLC38A2/EIF2AK3/RRAGB/EIF2AK2/RNF152/SESN3	17
BP	GO:0006405	RNA export from nucleus	26/3781	84/18723	0.012816	0.0854397	0.0693734	DHX9/YTHDC1/SETD2/SMG1/CPSF6/PHAX/NUP133/THOC2/TPR/MCM3AP/SMG6/POM121/NUP160/NCBP1/NUP153/NUP155/FYTTD1/SMG7/TSC1/GLE1/NUP188/SUPT6H/UPF2/NUP107/XPOT/DDX39B	26
BP	GO:0009953	dorsal/ventral pattern formation	26/3781	84/18723	0.012816	0.0854397	0.0693734	ARL13B/INTU/WDR19/AIDA/SMAD2/CTNNB1/TTC21B/DYNC2H1/TBC1D32/BMPR1A/PSEN1/SUFU/GLI3/TCTN1/TULP3/ACVR1/GORAB/LMX1B/FOXA1/CXXC4/WNT3/BMPR1B/GREM1/EN1/PRKACB/ASCL1	26
BP	GO:2000134	negative regulation of G1/S transition of mitotic cell cycle	26/3781	84/18723	0.012816	0.0854397	0.0693734	GIGYF2/APC/CDC73/SDE2/DLG1/RBL2/WAC/CTDSP2/PRKDC/WEE1/RB1/CTDSPL/PKD2/PTEN/ATM/ZNF655/MDM2/RFWD3/BCL2/KANK2/CCND1/CDKN1B/RBL1/SOX4/E2F7/PLK2	26
BP	GO:0008154	actin polymerization or depolymerization	58/3781	218/18723	0.0129779	0.0864258	0.0701741	GMFB/WASL/LATS1/TWF1/AP1AR/RICTOR/DLG1/MTOR/TTC17/ARFGEF1/NCKAP1/CAPZA2/RASA1/ABI2/ARFIP1/ARHGAP35/MTPN/FER/SSH1/PIK3CA/ADD1/CYFIP1/EPS8/TMOD3/JMY/WASHC5/SPTAN1/FMN1/SPIRE1/ACTR2/LIMA1/SPTBN1/SNX9/CARMIL1/WASF2/SSH2/ENAH/BAG4/PPP1R9A/MICAL2/SWAP70/GRB2/PRKCE/CRACD/SEMA5A/PREX1/SVIL/MYADM/RDX/SLIT2/TMSB10/FHOD3/SSH3/IQGAP2/CYFIP2/ADD3/EVL/COBL	58
BP	GO:0000578	embryonic axis specification	14/3781	38/18723	0.0130044	0.0865091	0.0702417	TASOR/SMAD4/EPB41L5/SMAD2/CTNNB1/FRS2/C2CD3/PCSK6/TBX3/STIL/CXXC4/TDRD5/WNT5A/COBL	14
BP	GO:0051047	positive regulation of secretion	79/3781	310/18723	0.0132824	0.0882638	0.0716664	CREB1/CLASP2/SNX4/EXOC1/PTPN11/VPS4B/PDCD6IP/CLASP1/KIF5B/TMF1/OSBP/AP1G1/CD2AP/SMAD4/PPP3CB/PPID/RAB3GAP1/MYH10/STAM/DNM1L/TSG101/GOLPH3/SELENOT/RAB2B/ITSN1/TMED10/SYTL4/RAB3D/ACSL3/RAB27B/GLUD1/TM7SF3/PFKM/SLC12A2/UNC13B/GOLPH3L/ILDR1/MYB/STXBP5/PRKCE/RAB8B/ADAM9/PLA2R1/MYRIP/GLUL/ABAT/ANO1/CADPS2/MYO18A/SOX4/XBP1/SLC4A8/STXBP1/GJA1/SDC4/HFE/GPR27/INHBA/SYBU/ABCG1/CYBA/SYT7/GAB2/TGFB3/LRP1/TGFB…	79
BP	GO:0097193	intrinsic apoptotic signaling pathway	74/3781	288/18723	0.0133032	0.0883072	0.0717016	CUL3/HNRNPK/USP47/BCLAF1/DDX3X/SIRT1/HIPK1/PRKRA/APAF1/MARCHF7/QRICH1/TRIM32/ERCC6/UBQLN1/EP300/UBE2K/OPA1/CUL5/TOPORS/BECN1/TAF9B/NBN/BCL2L11/BAG5/SERINC3/ABL1/PRKDC/JMY/MLH1/DNM1L/GSKIP/CUL2/MSH6/CUL4A/TMBIM6/PLAGL2/EIF2AK3/DNAJC10/NFE2L2/PDCD10/RRM2B/MSH2/STK24/MOAP1/USP28/SKIL/ITPR1/PARP1/BCL2L2/BRCA1/FIGNL1/ATM/MDM2/FNIP2/BCL2/PDK2/PTPN1/HIPK2/HYOU1/WFS1/BRCA2/ERN1/PIK3R1/XBP1/EDA2R/PMAIP1/M…	74
BP	GO:0030859	polarized epithelial cell differentiation	10/3781	24/18723	0.0134488	0.089082	0.0723307	DLG5/MYO9A/RAB10/OPHN1/TTC8/AHI1/WNT5A/FAT1/SLC9A3R1/TP63	10
BP	GO:0061162	establishment of monopolar cell polarity	10/3781	24/18723	0.0134488	0.089082	0.0723307	PRKCI/MYO9A/GBF1/PATJ/OPHN1/TTC8/MAP1B/WNT5A/FAT1/SLC9A3R1	10
BP	GO:0071900	regulation of protein serine/threonine kinase activity	90/3781	359/18723	0.0135268	0.0895027	0.0726723	CCNT1/ALS2/NF1/DDX3X/IPO7/APC/SIRT1/LATS1/PRKAR2A/TAOK1/RICTOR/TRAF6/ETAA1/CCNT2/BMPR2/PRKAR1A/HIPK3/HMGCR/GTF2H1/ADAM17/IQGAP1/AIDA/CCNI/PIK3CB/HTT/ABL1/ZNF675/CCNK/RAPGEF2/CAB39/BMPR1A/DAZAP2/KRAS/MAP3K7/PSEN1/TAOK3/TSG101/CCNG2/AKAP13/LRP6/MAP3K4/IPO5/PDCD10/INCA1/RB1/CDK12/CCNG1/STK4/RPTOR/PKD2/PTEN/THBS1/SORL1/STK3/PAQR3/KITLG/INSR/ATP2B4/PKD1/CCNE2/PTPN1/ADAM9/CCND1/CAB39L/PDGFC/INCENP/CDKN…	90
BP	GO:0051569	regulation of histone H3-K4 methylation	12/3781	31/18723	0.0136494	0.089833	0.0729406	CTR9/PAXIP1/KMT2E/RTF1/SMAD4/BCOR/CTNNB1/KMT2A/BRCA1/DNMT1/MYB/GATA3	12
BP	GO:0060390	regulation of SMAD protein signal transduction	12/3781	31/18723	0.0136494	0.089833	0.0729406	BMPR2/SMAD4/BMPR1A/SPTBN1/PARP1/PBLD/TGFBR1/SLC2A10/TOB1/TGFB3/LRP1/CILP	12
BP	GO:0061099	negative regulation of protein tyrosine kinase activity	12/3781	31/18723	0.0136494	0.089833	0.0729406	IBTK/SOCS4/GGNBP2/SNX6/SOCS5/PSEN1/TSG101/CBL/NCAPG2/SH3BP5/GPRC5A/SRCIN1	12
BP	GO:0071711	basement membrane organization	12/3781	31/18723	0.0136494	0.089833	0.0729406	CLASP2/CLASP1/DAG1/ITGB1/PHLDB1/NID1/PHLDB2/NID2/PXDN/LAMB2/NTN4/HPN	12
BP	GO:2000144	positive regulation of DNA-templated transcription, initiation	12/3781	31/18723	0.0136494	0.089833	0.0729406	CREB1/BCLAF1/CAND1/DHX36/ERCC6/MED14/PAXIP1/SETX/MED13/MED12/MED1/ESR1	12
BP	GO:0002011	morphogenesis of an epithelial sheet	19/3781	57/18723	0.0138267	0.09071	0.0736526	CLASP2/MTOR/CLASP1/DAG1/ARHGAP35/PHACTR4/RREB1/ADAM17/ARHGAP12/LIN7C/NOTCH2/SOS1/PDCD10/PTEN/DDR1/PHLDB2/FERMT2/WNT5A/FLRT3	19
BP	GO:0016447	somatic recombination of immunoglobulin gene segments	19/3781	57/18723	0.0138267	0.09071	0.0736526	TP53BP1/RIF1/MSH3/PAXIP1/KMT5B/SHLD2/NBN/PRKDC/MLH1/MSH6/NDFIP1/SUPT6H/LIG4/RNF168/NSD2/MSH2/SWAP70/TFRC/TNFSF13	19
BP	GO:1902017	regulation of cilium assembly	19/3781	57/18723	0.0138267	0.09071	0.0736526	CEP97/CCP110/CEP120/ARHGAP35/CEP135/HTT/SEPTIN7/ATMIN/SDCCAG8/DYNC2LI1/IFT88/BBS4/TAPT1/CDKL5/YAP1/IFT140/MNS1/ZMYND10/DCDC2	19
BP	GO:0019439	aromatic compound catabolic process	114/3781	467/18723	0.013891	0.0910351	0.0739166	GIGYF2/DHX9/PUM1/TTC37/PUM2/THRAP3/DCP1A/MTREX/METTL14/SMG1/HNRNPR/CNOT6/CELF1/XRN2/ZC3H14/PHAX/HNRNPU/ROCK1/DHX36/YTHDF3/GSPT1/NBAS/TNRC6A/MTOR/PDE12/ETF1/DCP2/DROSHA/CNOT6L/SMG6/RC3H2/FASTKD2/LRPPRC/TENT2/CNOT1/NCBP1/DIS3/MAPK14/FASTKD3/ANGEL2/SMG7/EXOSC10/TET2/LARP1/PAN2/AGO1/CNOT8/PAN3/METTL16/PAIP1/DICER1/XRN1/ZC3HAV1/FMR1/FXR1/MLH1/RC3H1/PNRC2/SECISBP2/NAF1/SMG8/TDG/TUT7/DIS3L/AGO4/AGO3/EDC…	114
BP	GO:0045773	positive regulation of axon extension	15/3781	42/18723	0.0140909	0.0922479	0.0749013	ADNP/EIF4G2/PAFAH1B1/BMPR2/GOLGA4/MACF1/CYFIP1/SHTN1/RAB11A/CDKL5/SEMA5A/MAPT/MAP1B/FN1/LRP1	15
BP	GO:0097191	extrinsic apoptotic signaling pathway	58/3781	219/18723	0.0142598	0.093232	0.0757004	DDX3X/RNF41/BIRC6/HIPK1/ZMYND11/RAF1/FEM1B/PHIP/PDPK1/GSK3B/PAK2/BCL2L11/RB1CC1/EYA3/CTNNA1/CASP8AP2/HTT/PSME3/MADD/SH3RF1/ACVR1B/RFFL/ITGAV/FOXO3/MOAP1/SKIL/STK4/ACVR1/SORT1/BCL2L2/BRCA1/ERBB3/PTEN/THBS1/GCLC/SMAD3/BCL2/STK3/GCLM/KITLG/YAP1/TGFBR1/SIAH2/PIK3R1/UNC5B/AR/PMAIP1/INHBA/TLR3/FGFR1/TIMP3/RET/TGFB2/DEPTOR/BMPR1B/ITGA6/FGFR3/FGF10	58
BP	GO:0040013	negative regulation of locomotion	97/3781	391/18723	0.0142714	0.093232	0.0757004	NF1/ARID2/CLASP2/RNF41/RNF20/WASL/AP1AR/SCAI/CLASP1/DAG1/DLG5/TCAF1/CTNNA1/SYNJ2BP/CERS2/RYK/MECP2/BMPR1A/GNA13/STAT3/CRK/ABHD2/OSBPL8/NFE2L2/PDCD10/MACIR/FOXO3/DUSP3/STK24/LRCH1/SEMA4F/VCL/C5/PTPRG/SRGAP1/ADIPOR2/PTEN/MIA3/SEMA3C/THBS1/AFDN/LDLRAD4/BCL2/STARD13/PATZ1/ZMYND8/CCDC125/MCC/TP53INP1/PRKG1/RAP2C/ATP2B4/CLIC4/SEMA5A/SPRED1/DACH1/SINHCAF/ARRDC3/DNAJA4/PHLDB2/GATA3/C5AR2/SEMA3F/SLIT2/GJA…	97
BP	GO:0030837	negative regulation of actin filament polymerization	21/3781	65/18723	0.0145218	0.0947123	0.0769023	TWF1/ARFGEF1/CAPZA2/MTPN/SSH1/ADD1/EPS8/TMOD3/SPTAN1/SPTBN1/CARMIL1/SSH2/CRACD/SVIL/MYADM/RDX/SLIT2/TMSB10/FHOD3/SSH3/ADD3	21
BP	GO:0009416	response to light stimulus	81/3781	320/18723	0.0145287	0.0947123	0.0769023	TAF1/CREB1/USP47/NF1/MAP4K3/CLOCK/RO60/POLK/SIRT1/ERCC4/DHX36/TRIM32/ERCC6/PRIMPOL/INO80/CREBBP/IMPACT/SDE2/SLC24A1/EP300/MTOR/CUL4B/XPC/ATR/REV1/PIAS1/EIF2AK4/RHBDD1/TENT2/ZBTB1/HMGCR/MAPK8/FBXL17/FECH/CRY1/PPID/UBE4B/FMR1/WRN/NMT1/ITGB1/MECP2/KRAS/DDB1/MSH6/CDS1/EIF2S1/SPRTN/NEDD4/FBXL3/PER2/MAP3K4/CCDC66/NPTN/MSH2/GNAQ/TANC1/USP1/USP28/PARP1/HMGCS1/UVSSA/MDM2/SYNGAP1/CAT/DDHD2/BCL2/POLD3/PER3/…	81
BP	GO:0001678	cellular glucose homeostasis	47/3781	172/18723	0.014584	0.0949726	0.0771136	SIN3A/SIRT1/RAF1/WDR35/OPA1/KIF5B/RAB11FIP2/OSBP/ZNF236/STXBP3/HMGCR/CCDC186/PPP3CB/PIK3CA/NUCKS1/SELENOT/STXBP4/FOXO3/HK1/PDK3/GCLC/IGF1R/UNC13B/GCLM/PRKCE/SLC39A14/KLF7/ANO1/HK2/ERN1/PIK3R1/SOX4/XBP1/PPP3CA/PRKAA1/PRKAA2/KCNJ11/TIAM1/GPR27/SYBU/ABCG1/CYBA/LRP1/ABCC8/CAMK2N1/BAIAP3/ADCY5	47
BP	GO:0006352	DNA-templated transcription, initiation	37/3781	130/18723	0.0148365	0.0964458	0.0783099	TAF1/CREB1/BCLAF1/SMARCA5/GTF3C4/CAND1/BDP1/TFAM/GTF2A1/BAZ2A/DHX36/ERCC6/MED14/PAXIP1/RRN3/SETX/ATF7IP/NCOA6/MED13/MED23/TAF9B/MED12/TAF2/TAF1B/DR1/POLR1F/GTF3C1/GTF2E1/RSF1/TAF6/TFB2M/MED1/MAZ/PPM1D/ESR1/BRF2/H4-16	37
BP	GO:0043588	skin development	68/3781	263/18723	0.0148488	0.0964458	0.0783099	ASH1L/WDR48/LATS1/ROCK1/AP3B1/INTU/ATP7A/SMAD4/ZMPSTE24/GRHL2/CTNNB1/FLNB/ACVR1B/PSEN1/SUFU/TSG101/ZDHHC21/PIP5K1A/SOS1/PTGES3/NCOA3/ROCK2/ITGA2/SAV1/STK4/NUMA1/IFT74/MED1/GORAB/BCL2/YAP1/PKD1/CLIC4/UGCG/ADAM9/DSP/FOSL2/PALLD/IRF6/ASAH1/ARRDC3/FZD3/SLC2A10/LGR4/TNFRSF19/LAMA5/FZD6/INHBA/DHCR24/LTB/ITGA3/WNT5A/CD109/GRHL1/TGFB2/COL5A2/FGFR2/IGFBP5/ITGA6/COL3A1/IL20/COL1A2/TP63/KRT16/CSTA/FGF10/S10…	68
BP	GO:0007589	body fluid secretion	28/3781	93/18723	0.014857	0.0964458	0.0783099	CREB1/WNK1/ATP7A/PRLR/PPAT/NCOA1/COPA/MED1/CELSR2/NCOR2/STK39/PRKCE/STAT5B/DDR1/ERBB4/CCND1/GPAT4/HK2/XBP1/CYBA/WNK4/P2RY2/AGR2/OXTR/KCNN4/NEURL1/FGF10/AQP5	28
BP	GO:0072088	nephron epithelium morphogenesis	23/3781	73/18723	0.0148925	0.0965745	0.0784143	DLG1/GZF1/SMAD4/CTNNB1/PBX1/FMN1/GLI3/SIX4/DCHS1/PKD2/AHI1/BCL2/PKD1/NPNT/GREB1L/GATA3/LGR4/LAMA5/WNK4/FGF1/GREM1/GPC3/SIX1	23
BP	GO:0000380	alternative mRNA splicing, via spliceosome	24/3781	77/18723	0.0149803	0.0967541	0.0785601	DHX9/YTHDC1/REST/THRAP3/CELF1/HNRNPU/CDK13/SLU7/SRSF1/RSRC1/DYRK1A/DDX17/FAM172A/RBM25/RBFOX2/FMR1/FXR1/NSRP1/STRAP/RAVER1/MBNL2/RBM11/RBM24/NOVA1	24
BP	GO:0034198	cellular response to amino acid starvation	16/3781	46/18723	0.0149908	0.0967541	0.0785601	LARS1/IMPACT/MTOR/EIF2AK4/BECN1/MAPK1/MAPK8/GCN1/MIOS/EIF2S1/SLC38A2/EIF2AK3/RRAGB/EIF2AK2/RNF152/SESN3	16
BP	GO:0060976	coronary vasculature development	16/3781	46/18723	0.0149908	0.0967541	0.0785601	SEC24B/SETD2/ARID2/ZBTB14/AP2B1/DCTN5/DYNC2H1/SUFU/NDST1/CNTRL/SPRED1/TGFBR1/LRP2/PDGFRB/TGFBR3/GPC3	16
BP	GO:0098773	skin epidermis development	26/3781	85/18723	0.0150008	0.0967541	0.0785601	AP3B1/INTU/ATP7A/SMAD4/ZMPSTE24/CTNNB1/ACVR1B/ZDHHC21/SOS1/SAV1/NUMA1/GORAB/BCL2/FZD3/LGR4/TNFRSF19/LAMA5/FZD6/INHBA/WNT5A/CD109/TGFB2/FGFR2/IGFBP5/TP63/FGF10	26
BP	GO:0001942	hair follicle development	25/3781	81/18723	0.0150141	0.0967541	0.0785601	INTU/ATP7A/SMAD4/ZMPSTE24/CTNNB1/ACVR1B/ZDHHC21/SOS1/SAV1/NUMA1/GORAB/BCL2/FZD3/LGR4/TNFRSF19/LAMA5/FZD6/INHBA/WNT5A/CD109/TGFB2/FGFR2/IGFBP5/TP63/FGF10	25
BP	GO:0060968	regulation of gene silencing	25/3781	81/18723	0.0150141	0.0967541	0.0785601	DHX9/PUM1/PUM2/TASOR/TPR/ZNF304/ATF7IP/SETDB1/NCOR1/ZMPSTE24/PHF2/DDX6/PHF8/FMR1/ADAR/FXR1/MPHOSPH8/STAT3/TNRC6B/RESF1/DNMT1/NCOR2/ESR1/PPP3CA/AGO2	25
BP	GO:0006084	acetyl-CoA metabolic process	13/3781	35/18723	0.0152608	0.0975107	0.0791745	ACLY/DLAT/PDHX/DLD/ACACA/PDK3/HMGCS1/PDK2/AASS/FASN/NUDT8/ACACB/PDK4	13
BP	GO:0031076	embryonic camera-type eye development	13/3781	35/18723	0.0152608	0.0975107	0.0791745	SP3/HIPK1/PHACTR4/WDR19/FRS2/TULP3/IFT140/HIPK2/TFAP2A/WNT5A/CITED2/RARA/FGF10	13
BP	GO:0070536	protein K63-linked deubiquitination	13/3781	35/18723	0.0152608	0.0975107	0.0791745	USP8/ZRANB1/USP7/ABRAXAS1/OTUD4/USP33/ABRAXAS2/USP16/OTUD7B/BRCC3/OTUB2/USP13/USP25	13
BP	GO:0090181	regulation of cholesterol metabolic process	13/3781	35/18723	0.0152608	0.0975107	0.0791745	MBTPS2/ERLIN1/LPCAT3/MBTPS1/ERLIN2/PRKAA1/FMO5/ABCG1/LDLR/FGF1/APOE/SREBF1/SEC14L2	13
BP	GO:0045056	transcytosis	9/3781	21/18723	0.0152893	0.0975107	0.0791745	USO1/RAB11A/VPS35/CLTC/IGF1R/LRP2/MAL2/LRP1/GP2	9
BP	GO:0048199	vesicle targeting, to, from or within Golgi	9/3781	21/18723	0.0152893	0.0975107	0.0791745	CUL3/GOSR1/AP1AR/KLHL12/PPP6C/GBF1/TMED10/CEP19/WIPI1	9
BP	GO:0048485	sympathetic nervous system development	9/3781	21/18723	0.0152893	0.0975107	0.0791745	NF1/CTNNB1/SOX4/FZD3/GATA3/SEMA3F/TP63/ASCL1/TFAP2B	9
BP	GO:0097062	dendritic spine maintenance	9/3781	21/18723	0.0152893	0.0975107	0.0791745	TANC1/VPS35/ABHD17B/IGF1R/ZMYND8/INSR/HOMER1/ITGA3/APOE	9
BP	GO:0099515	actin filament-based transport	9/3781	21/18723	0.0152893	0.0975107	0.0791745	WASL/MYO6/FNBP1L/MYO5C/MYO5B/SYNE2/MYO5A/MYO1D/MYO1B	9
BP	GO:0150105	protein localization to cell-cell junction	9/3781	21/18723	0.0152893	0.0975107	0.0791745	PAK2/DLG5/TJP1/JAK1/MAPK9/VCL/MPP7/DSP/CGNL1	9
BP	GO:0030323	respiratory tube development	49/3781	181/18723	0.0153077	0.0975272	0.0791879	CREB1/SEC24B/SP3/AP3B1/EP300/DAG1/RC3H2/BMPR2/EIF4E/MAN1A2/ATP7A/ATXN1L/MAPK1/DLG5/GRHL2/SMAD2/CTNNB1/ASXL1/BMPR1A/KRAS/PTGES3/GLI3/MAN2A1/TULP3/SAV1/CELSR1/YAP1/THRB/PKD1/HEG1/ABCA3/PGR/FOXA1/LAMA5/PDGFRB/ITGA3/WNT5A/TGFB3/FGF1/FGFR2/IGFBP5/SREBF1/LOX/AGR2/TNC/GPC3/ASCL1/FGF10/SPDEF	49
BP	GO:0050708	regulation of protein secretion	69/3781	268/18723	0.0156313	0.0993843	0.0806958	REST/EXOC1/CLOCK/PTPN11/PIK3C3/KIF5B/OSBP/ARFIP1/CD2AP/HMGCR/PPP3CB/PPID/MYH10/DNM1L/GOLPH3/RAB11FIP1/PER2/TMED10/SYTL4/STXBP4/ARNTL/GLUD1/TM7SF3/IRS1/CYP51A1/PFKM/SLC12A2/LLGL1/RFX3/UNC13B/GOLPH3L/STXBP5/PRKCE/ADAM9/KLF7/MYRIP/GLUL/CPT1A/ABAT/ANO1/MYO18A/SOX4/F2R/PPP3CA/RAB11FIP3/GJA1/KCNJ11/TIAM1/GPR27/SYBU/ABCG1/SYT7/TGFB3/LRP1/TGFB2/SYT9/SRCIN1/APOE/ABCC8/SREBF1/WLS/CAMK2N1/CCL5/BAIAP3/ADCY5/…	69
BP	GO:0051348	negative regulation of transferase activity	69/3781	268/18723	0.0156313	0.0993843	0.0806958	NF1/IPO7/APC/IBTK/SIRT1/HNRNPU/SMCR8/SOCS4/LATS1/PRKAR2A/POT1/WNK1/PDPK1/GSK3B/GGNBP2/RUBCN/PRKAR1A/PAK2/HIPK3/HMGCR/BAG5/AIDA/SNX6/PIK3CB/ABL1/ZNF675/ADAR/TERF1/GSKIP/SOCS5/PSEN1/TSG101/CBL/PRDX3/LRP6/PIP4K2C/IPO5/YWHAG/CEP85/INCA1/RB1/EIF4A2/GNAQ/DUSP3/PIP4K2B/COX11/PTEN/SORL1/PAQR3/NCAPG2/DTX3L/PPP2R5A/PTPN1/SPRED1/CDKN1B/SH3BP5/HEG1/PTPRT/MAPT/PRKAR2B/MAPK8IP1/PDCD4/NR2F2/DEPTOR/GPRC5A/SRCIN1…	69
BP	GO:0008089	anterograde axonal transport	17/3781	50/18723	0.0157234	0.0997068	0.0809577	KIF3B/AP3B1/AP3M1/KIF3A/KIF5B/BLOC1S6/SPAST/ARL8B/RAB21/TRAK1/KIF1B/TRAK2/RAB27B/AP3M2/MAP1A/KIF5C/SYBU	17
BP	GO:0038093	Fc receptor signaling pathway	17/3781	50/18723	0.0157234	0.0997068	0.0809577	APPL1/TRAF6/FER/MAPK8/APPL2/ABL1/MAP3K7/SOS1/MAPK9/MAP3K1/PTK2/MAP2K4/VAV2/IKBKB/VAV3/PRKCE/YES1	17
BP	GO:0034219	carbohydrate transmembrane transport	34/3781	118/18723	0.0157304	0.0997068	0.0809577	APPL1/PTPN11/ARPP19/C2CD5/PRKCI/STXBP3/MAPK14/TSC1/BRAF/APPL2/OCLN/OSBPL8/RNASEL/CREBL2/MEF2A/NFE2L2/STXBP4/SLC5A3/SORT1/ADIPOR2/IRS1/SLC23A2/TMEM144/INSR/SLC17A5/ENPP1/EDNRA/HK2/PIK3R1/YES1/SLC2A10/SORBS1/SLC1A2/GPC3	34
BP	GO:0030324	lung development	48/3781	177/18723	0.0157474	0.0997118	0.0809617	CREB1/SEC24B/SP3/AP3B1/EP300/DAG1/RC3H2/BMPR2/EIF4E/MAN1A2/ATP7A/ATXN1L/MAPK1/DLG5/GRHL2/SMAD2/CTNNB1/ASXL1/BMPR1A/KRAS/PTGES3/GLI3/MAN2A1/SAV1/CELSR1/YAP1/THRB/PKD1/HEG1/ABCA3/PGR/FOXA1/LAMA5/PDGFRB/ITGA3/WNT5A/TGFB3/FGF1/FGFR2/IGFBP5/SREBF1/LOX/AGR2/TNC/GPC3/ASCL1/FGF10/SPDEF	48
BP	GO:0051894	positive regulation of focal adhesion assembly	11/3781	28/18723	0.0158819	0.100358	0.0814863	PTPN11/ROCK1/EPB41L5/IQGAP1/TSC1/ABL1/FMN1/SMAD3/FERMT2/SDC4/TEK	11
BP	GO:1990776	response to angiotensin	11/3781	28/18723	0.0158819	0.100358	0.0814863	PTPN11/ROCK1/AHCYL1/IQGAP1/NFE2L2/ROCK2/NFKB1/BRIP1/CYBA/AGTR1/CA2	11
BP	GO:0001764	neuron migration	43/3781	156/18723	0.0162283	0.102442	0.0831789	NIPBL/TOP2B/PAFAH1B1/ZNF609/CRKL/USP9X/CTNNB1/SH3RF1/ZMIZ1/RAPGEF2/LRIG2/PSEN1/STAT3/CRK/SDCCAG8/SHTN1/NDE1/PCM1/KIF20B/FBXO45/CDKL5/CELSR1/CELSR2/PRKG1/NAV1/POMK/ASTN2/FZD3/GATA3/LRP12/DCLK1/MAP1B/FGFR1/ITGA3/SPOCK1/DCDC2/NR2F2/NRCAM/ASPM/NR4A2/COL3A1/NTRK2/ASCL1	43
BP	GO:0048259	regulation of receptor-mediated endocytosis	32/3781	110/18723	0.016282	0.102629	0.0833307	HNRNPK/WASL/TBC1D5/MKLN1/USP46/SCYL2/ATXN2/HIP1/UBQLN2/CD2AP/PIK3CB/SYNJ1/FMR1/RAB21/ATAD1/SMAP1/OPHN1/CBL/ITGAV/NEU3/BMP2K/AHI1/INSR/PPT1/ABCA2/DGKD/ARRB1/HFE/DNAJC6/APOC1/GREM1/CCL19	32
BP	GO:0001706	endoderm formation	18/3781	54/18723	0.0163078	0.102629	0.0833307	SETD2/CTR9/CDC73/RTF1/SMAD2/CTNNB1/ITGAV/LEO1/LAMA3/COL12A1/ITGB5/INHBA/FN1/COL5A2/COL8A1/DUSP5/DUSP4/COL11A1	18
BP	GO:0051703	biological process involved in intraspecies interaction between organisms	18/3781	54/18723	0.0163078	0.102629	0.0833307	CHD8/MTOR/ATXN1L/VPS13A/MECP2/EIF4EBP2/PCM1/ATXN1/RPTOR/CIC/PTEN/SHANK2/GRPR/CX3CR1/SLC6A4/EN1/OXTR/CNTNAP2	18
BP	GO:0042157	lipoprotein metabolic process	38/3781	135/18723	0.0163788	0.102972	0.0836085	PIK3C3/RAB3GAP2/PIGN/PPM1A/ZDHHC17/RABL3/PIGO/RAB3GAP1/NMT1/PIGB/ZDHHC21/PIGK/PIGS/ABHD13/ZDHHC20/LYPLA1/ITGAV/PIGM/GOLGA7/PIGG/HHAT/ABHD17B/SVIP/PIGV/ATG16L1/ZDHHC23/PGAP1/PIGW/PPT1/UGCG/ABCA1/GLUL/WIPI1/LDLR/APOC1/ZDHHC2/LRP1/APOE	38
BP	GO:2000785	regulation of autophagosome assembly	14/3781	39/18723	0.0165992	0.104251	0.0846472	SMCR8/RAB3GAP2/TBC1D14/PIKFYVE/UBQLN2/BECN1/TBC1D12/RAB3GAP1/MTM1/IFT88/PIP4K2C/PIP4K2B/SEC22B/ELAPOR1	14
BP	GO:0035904	aorta development	19/3781	58/18723	0.016762	0.105167	0.085391	SEC24B/HECTD1/AP2B1/DCTN5/BMPR1A/SUFU/NDST1/PKD2/CNTRL/SOX4/CHD7/LRP2/PDGFRB/MYLK/LRP1/TGFB2/LOX/SIX1/TFAP2B	19
BP	GO:0051960	regulation of nervous system development	108/3781	443/18723	0.0168758	0.105773	0.0858832	REST/ADNP/NF1/CAPRIN1/DIP2B/DHX36/TRIM32/EIF4G2/XRCC5/DLG1/OPA1/MTOR/PAFAH1B1/PRMT5/DAG1/BMPR2/SPEN/PRKCI/FBXW8/UFL1/GOLGA4/DLG5/MACF1/CTNNA1/CTNNB1/APPL2/CERS2/SYNJ1/DICER1/CYFIP1/RAB21/RAPGEF2/DNM1L/RYK/RNF6/BMPR1A/PSEN1/TRAK1/NIN/ACTR2/DOCK7/SHTN1/PRUNE1/EIF2AK3/LIG4/PER2/EEF2K/PCM1/ULK2/GLI3/RAB11A/IL6ST/ARNTL/NPTN/TRAK2/MAN2A1/SKIL/SEMA4F/CDKL5/PTEN/SEMA3C/SORL1/HOOK3/SYNGAP1/ELAPOR2/CLSTN2/…	108
BP	GO:0060675	ureteric bud morphogenesis	20/3781	62/18723	0.0171025	0.106543	0.0865086	DLG1/GZF1/SMAD4/CTNNB1/PBX1/FMN1/GLI3/SIX4/DCHS1/PKD2/BCL2/NPNT/GREB1L/GATA3/LGR4/LAMA5/FGF1/GREM1/GPC3/SIX1	20
BP	GO:0030073	insulin secretion	52/3781	195/18723	0.0171026	0.106543	0.0865086	REST/CLOCK/PTPN11/RAF1/KIF5B/RAB11FIP2/OSBP/STXBP3/HMGCR/CCDC186/PPP3CB/SMAD2/SNX19/SELENOT/PER2/SYTL4/CYB5R4/STXBP4/ARNTL/PCLO/GLUD1/TM7SF3/IRS1/PFKM/RFX3/PRKCE/RAPGEF4/KLF7/MYRIP/GLUL/CPT1A/ABAT/ANO1/SOX4/PPP3CA/GJA1/KCNJ11/TIAM1/GPR27/SYBU/ABCG1/SYT7/LRP1/SYT9/ABCC8/SREBF1/CAMK2N1/CCL5/BAIAP3/ADCY5/SLC30A8/TFAP2B	52
BP	GO:0045185	maintenance of protein location	28/3781	94/18723	0.0171833	0.106543	0.0865086	HNRNPU/LATS1/ANKRD13C/TWF1/G3BP2/TOPORS/MORC3/VPS13A/VPS13D/VPS13C/SUFU/GOLPH3/YWHAB/GOPC/BBS4/SKP1/TAPT1/BARD1/HK1/PKD2/SORL1/ANK3/PKD1/HK2/CHCHD10/GJA1/TMSB10/FBN1	28
BP	GO:0061326	renal tubule development	28/3781	94/18723	0.0171833	0.106543	0.0865086	DLG1/GZF1/SMAD4/CTNNB1/PBX1/FMN1/NOTCH2/TTC8/GLI3/SIX4/DCHS1/PKD2/AHI1/BCL2/YAP1/PKD1/NPNT/GREB1L/GATA3/LGR4/LAMA5/MTSS1/WNK4/FGF1/GREM1/GPC3/SIX1/TFAP2B	28
BP	GO:0006625	protein targeting to peroxisome	8/3781	18/18723	0.0171883	0.106543	0.0865086	PEX1/PEX12/PEX19/ZFAND6/PEX2/LONP2/PEX5/RAB8B	8
BP	GO:0007549	dosage compensation	8/3781	18/18723	0.0171883	0.106543	0.0865086	YTHDC1/HNRNPU/RLIM/EXOSC10/SMCHD1/CDYL/BRCA1/PCGF5	8
BP	GO:0015693	magnesium ion transport	8/3781	18/18723	0.0171883	0.106543	0.0865086	ZDHHC17/CNNM4/NIPA2/MAGT1/MMGT1/NIPA1/NIPAL3/SLC41A1	8
BP	GO:0036499	PERK-mediated unfolded protein response	8/3781	18/18723	0.0171883	0.106543	0.0865086	QRICH1/PPP1R15B/TMEM33/EIF2S1/EIF2AK3/NFE2L2/PTPN1/AGR2	8
BP	GO:0051382	kinetochore assembly	8/3781	18/18723	0.0171883	0.106543	0.0865086	SENP6/CENPC/RNF4/POGZ/MIS12/KNTC1/CENPE/CENPF	8
BP	GO:0072662	protein localization to peroxisome	8/3781	18/18723	0.0171883	0.106543	0.0865086	PEX1/PEX12/PEX19/ZFAND6/PEX2/LONP2/PEX5/RAB8B	8
BP	GO:0072663	establishment of protein localization to peroxisome	8/3781	18/18723	0.0171883	0.106543	0.0865086	PEX1/PEX12/PEX19/ZFAND6/PEX2/LONP2/PEX5/RAB8B	8
BP	GO:0099175	regulation of postsynapse organization	27/3781	90/18723	0.0173452	0.107408	0.0872111	CAPRIN1/UBE3A/DHX36/OPA1/PAFAH1B1/ABI2/CHMP2B/ADAM10/DNM1L/ACTR2/EEF2K/HSPA8/VPS35/ABHD17B/CDKL5/PTEN/PPP1R9A/TANC2/ZMYND8/PDLIM5/HOMER1/SEMA3F/PTPRS/TIAM1/WNT5A/SRCIN1/APOE	27
BP	GO:0035265	organ growth	48/3781	178/18723	0.0174398	0.107886	0.0875989	ARID2/PTPN11/UBE3A/LATS1/MTOR/PRKAR1A/MAPK1/ZMPSTE24/MAPK14/BCL2L11/VGLL4/SMAD2/BMPR1A/AKAP13/SMAD1/SAV1/MAP2K4/STK4/WWC2/FLVCR1/PTEN/EVC/BCL2/STK3/JARID2/PDLIM5/YAP1/RUNX1/ERBB4/ESR1/TGFBR1/DDX39B/HEG1/LEPR/GJA1/AR/DDR2/PDGFRB/CITED2/TGFB2/STC1/RARA/ACACB/FGFR2/SLC6A4/TGFBR3/FGFR3/FGF10	48
BP	GO:0022406	membrane docking	26/3781	86/18723	0.0174723	0.107924	0.0876299	ROCK1/EXOC4/BLOC1S6/ATP2A2/STXBP3/STX17/ATG14/AHCYL1/CEP290/PDZD8/USO1/RAB10/STX12/SNAP29/NSF/VAPB/ESYT1/ESYT2/RAB3D/UNC13B/SYTL2/RAB3IP/CTBP2/RAB8B/STXBP1/SYT1	26
BP	GO:0010811	positive regulation of cell-substrate adhesion	35/3781	123/18723	0.0174927	0.107924	0.0876299	PTPN11/ROCK1/GSK3B/DAG1/CRKL/RREB1/EPB41L5/IQGAP1/TSC1/ABL1/FMN1/CRK/DOCK1/CARMIL1/STK4/UTRN/SMAD3/RIN2/PRKCE/PREX1/CDH13/NID1/NPNT/MYADM/FERMT2/SDC4/EMP2/ITGA3/FN1/EDIL3/TEK/ECM2/COL8A1/ITGA6/AGR2	35
BP	GO:0060537	muscle tissue development	99/3781	403/18723	0.0174984	0.107924	0.0876299	SMAD5/CREB1/NF1/ARID2/MRTFB/HNRNPU/MAML1/PTCD2/EP300/DLG1/MTOR/CCNT2/MTPN/PRKAR1A/HMGCR/MAPK1/SMAD4/ZMPSTE24/MAPK14/VGLL4/TSC1/CTNNB1/DDX17/FRS2/COPS2/NR1D2/ITGB1/USP19/FLNB/BMPR1A/NOTCH2/BCL9/NLN/AKAP13/MEF2A/DSG2/SMAD1/ARNTL/RB1/AKIRIN1/SAV1/NEBL/MAP2K4/ACVR1/SIX4/PKD2/ACADM/SGCB/PTEN/MED1/SEMA3C/SMAD3/BCL2/TIPARP/JARID2/PDLIM5/YAP1/PKP2/RUNX1/ERBB4/HIVEP3/HOMER1/DSP/SVIL/TGFBR1/DDX39B/HEG1/PPP…	99
BP	GO:0014065	phosphatidylinositol 3-kinase signaling	40/3781	144/18723	0.017527	0.107993	0.0876857	PIK3C2A/NF1/SIRT1/UBE3A/BECN1/PIK3CA/PIK3CB/KBTBD2/PIP5K1A/CBL/NEDD4/PTK2/PTPN13/FBXL2/ERBB3/PTEN/IRS1/MAZ/CAT/IGF1R/INSR/ERBB4/ENTPD5/PDGFC/HCST/PIK3R1/F2R/UNC5B/GATA3/PDGFD/FGFR1/PDGFRB/FN1/TEK/TGFB2/SLC9A3R1/NTRK2/CCL5/FLT3/ERBB2	40
BP	GO:0030041	actin filament polymerization	51/3781	191/18723	0.0176243	0.108484	0.0880847	GMFB/WASL/LATS1/TWF1/AP1AR/RICTOR/DLG1/MTOR/TTC17/ARFGEF1/NCKAP1/CAPZA2/RASA1/ABI2/ARFIP1/MTPN/FER/SSH1/ADD1/CYFIP1/EPS8/TMOD3/JMY/WASHC5/SPTAN1/FMN1/SPIRE1/ACTR2/SPTBN1/SNX9/CARMIL1/WASF2/SSH2/BAG4/PPP1R9A/GRB2/PRKCE/CRACD/PREX1/SVIL/MYADM/RDX/SLIT2/TMSB10/FHOD3/SSH3/IQGAP2/CYFIP2/ADD3/EVL/COBL	51
BP	GO:0048841	regulation of axon extension involved in axon guidance	12/3781	32/18723	0.0179111	0.11003	0.0893398	BMPR2/RYK/SEMA4F/SEMA3C/SEMA5A/SEMA3F/SEMA4B/WNT3/SEMA6D/WNT5A/SEMA3E/SEMA3B	12
BP	GO:0060323	head morphogenesis	12/3781	32/18723	0.0179111	0.11003	0.0893398	NIPBL/PTPN11/EP300/RAB3GAP1/ATP6AP2/SGPL1/FLVCR1/TIPARP/ARID5B/WNT3/TGFB3/CRISPLD1	12
BP	GO:0046916	cellular transition metal ion homeostasis	33/3781	115/18723	0.0182122	0.111769	0.0907517	SLC30A9/IREB2/AP3B1/SLC30A5/ABCB7/SCO1/ATP6V1A/ATP7A/NCOA4/SMAD4/SLC39A10/SLC11A2/SLC30A7/NDFIP1/SLC30A1/FLVCR1/SLC39A6/SLC30A4/ATP7B/SLC31A1/TFRC/SLC46A1/SLC39A14/SLC40A1/HFE/CYBRD1/STEAP2/S100A8/LCN2/TMPRSS6/S100A9/SLC1A1/SLC30A8	33
BP	GO:0043583	ear development	56/3781	213/18723	0.0182453	0.111861	0.0908263	NIPBL/SEC24B/PTPN11/PRKRA/TRIP11/MYO6/OPA1/PAFAH1B1/MAPK1/CEP290/WDR19/BCL2L11/ADAM10/RPGRIP1L/ATP8B1/IFT88/TTC8/GLI3/PLS1/SIX4/TSHZ1/SLC4A7/DCHS1/LRIG1/SHROOM2/AHI1/BCL2/ESRP1/LRP10/MCM2/TTC39C/DDR1/CDKN1B/FZD3/ECE1/TFAP2A/GATA3/SDC4/ADGRV1/FZD6/CHD7/PDGFRB/WNT5A/STOX1/TGFB3/TGFB2/FGFR2/SLITRK6/LIN7A/SLC9A3R1/SLC44A4/HPN/FGF10/COL11A1/SIX1/PVALB	56
BP	GO:0060261	positive regulation of transcription initiation from RNA polymerase II promoter	10/3781	25/18723	0.0184375	0.112704	0.0915109	CREB1/CAND1/DHX36/ERCC6/MED14/PAXIP1/MED13/MED12/MED1/ESR1	10
BP	GO:0061339	establishment or maintenance of monopolar cell polarity	10/3781	25/18723	0.0184375	0.112704	0.0915109	PRKCI/MYO9A/GBF1/PATJ/OPHN1/TTC8/MAP1B/WNT5A/FAT1/SLC9A3R1	10
BP	GO:1904385	cellular response to angiotensin	10/3781	25/18723	0.0184375	0.112704	0.0915109	PTPN11/ROCK1/AHCYL1/NFE2L2/ROCK2/NFKB1/BRIP1/CYBA/AGTR1/CA2	10
BP	GO:0007595	lactation	16/3781	47/18723	0.018568	0.112832	0.0916151	CREB1/ATP7A/PRLR/PPAT/NCOA1/MED1/NCOR2/STAT5B/DDR1/ERBB4/CCND1/GPAT4/HK2/XBP1/OXTR/NEURL1	16
BP	GO:0014911	positive regulation of smooth muscle cell migration	16/3781	47/18723	0.018568	0.112832	0.0916151	ATP7A/IQGAP1/SSH1/CRK/DOCK7/ITGA2/MDM2/BCL2/DOCK4/PDGFD/POSTN/PDGFRB/SEMA6D/LRP1/IGFBP5/CCL5	16
BP	GO:0045646	regulation of erythrocyte differentiation	16/3781	47/18723	0.018568	0.112832	0.0916151	ARNT/MAPK14/PRKDC/RBFOX2/ACVR1B/SMAP1/STAT3/KAT7/HSPA9/ABCB10/FOXO3/MED1/KLF13/STAT5B/INHBA/ISG15	16
BP	GO:0045911	positive regulation of DNA recombination	16/3781	47/18723	0.018568	0.112832	0.0916151	TP53BP1/ARID2/WDR48/RIF1/ERCC6/PAXIP1/KMT5B/SHLD2/MLH1/ACTR2/NSD2/MSH2/PARP1/TIMELESS/TFRC/TNFSF13	16
BP	GO:0048483	autonomic nervous system development	16/3781	47/18723	0.018568	0.112832	0.0916151	NF1/PHACTR4/CTNNB1/EDNRA/SOX4/FZD3/TFAP2A/NAV2/GATA3/SEMA3F/FN1/RET/TP63/ASCL1/SIX1/TFAP2B	16
BP	GO:0061001	regulation of dendritic spine morphogenesis	16/3781	47/18723	0.018568	0.112832	0.0916151	CAPRIN1/UBE3A/DHX36/OPA1/PAFAH1B1/ABI2/ADAM10/DNM1L/ACTR2/EEF2K/PTEN/PPP1R9A/TANC2/PDLIM5/TIAM1/SRCIN1	16
BP	GO:0007569	cell aging	37/3781	132/18723	0.0188624	0.113971	0.0925392	NEK4/SIRT1/OPA1/MTOR/ATR/MORC3/MARCHF5/KAT6A/ZKSCAN3/ZMPSTE24/MAPK14/MAPK8/SMC5/ABL1/PRKDC/WRN/ZMIZ1/BMPR1A/KRAS/MAPK9/CTC1/ARNTL/PAWR/MAP2K4/PTEN/ATM/NUAK1/BCL2/PLA2R1/BRCA2/CDKN1B/RBL1/TBX3/PLK2/CITED2/PDCD4/TP63	37
BP	GO:0034599	cellular response to oxidative stress	73/3781	288/18723	0.0188921	0.113971	0.0925392	REST/LANCL1/SIN3A/ATF2/CHUK/SIRT1/PTPN11/PRKRA/SLC25A24/ADNP2/CHD6/UBQLN1/IMPACT/ERCC6L2/SETX/ATP2A2/BECN1/FER/ATP7A/ARNT/PNPLA8/MAPK1/MAPK8/BAG5/TSC1/OXR1/CTNNB1/ABL1/CAMKK2/VKORC1L1/GSKIP/EIF2S1/PYROXD1/STAU1/PRDX3/MAPK9/NFE2L2/PDCD10/ECT2/ERMP1/ARNTL/PAWR/FOXO3/NFE2L1/STK24/CPEB2/PARP1/PKD2/MDM2/BCL2/VRK2/DHFR/FUT8/MYB/TP53INP1/ABCC1/PDK2/PLA2R1/BRF2/ERN1/RBM11/PRKAA1/MAPT/PRKAA2/NET1/PDGFD/PT…	73
BP	GO:0000018	regulation of DNA recombination	31/3781	107/18723	0.0188932	0.113971	0.0925392	SMARCAD1/SETD2/TP53BP1/ARID2/WDR48/RIF1/MSH3/ERCC6/PPP4R2/KPNA1/PAXIP1/KMT5B/SHLD2/MLH1/SMCHD1/MRE11/MSH6/ACTR2/NDFIP1/SUPT6H/NSD2/MSH2/KLHL15/SPIDR/PARP1/FIGNL1/HELB/UBQLN4/TIMELESS/TFRC/TNFSF13	31
BP	GO:0042303	molting cycle	31/3781	107/18723	0.0188932	0.113971	0.0925392	NIPBL/CLOCK/FARP2/INTU/ATP7A/SMAD4/ZMPSTE24/CTNNB1/ACVR1B/ZDHHC21/SOS1/ARNTL/SAV1/NUMA1/LRIG1/GORAB/BCL2/FZD3/LGR4/TNFRSF19/LAMA5/FZD6/INHBA/WNT5A/CD109/TGFB2/FGFR2/IGFBP5/TP63/KRT16/FGF10	31
BP	GO:0042633	hair cycle	31/3781	107/18723	0.0188932	0.113971	0.0925392	NIPBL/CLOCK/FARP2/INTU/ATP7A/SMAD4/ZMPSTE24/CTNNB1/ACVR1B/ZDHHC21/SOS1/ARNTL/SAV1/NUMA1/LRIG1/GORAB/BCL2/FZD3/LGR4/TNFRSF19/LAMA5/FZD6/INHBA/WNT5A/CD109/TGFB2/FGFR2/IGFBP5/TP63/KRT16/FGF10	31
BP	GO:0007000	nucleolus organization	7/3781	15/18723	0.018975	0.113971	0.0925392	SMARCA5/SIRT1/BAZ2A/POLR1B/PHF2/PHF8/NOLC1	7
BP	GO:0010763	positive regulation of fibroblast migration	7/3781	15/18723	0.018975	0.113971	0.0925392	ITGB1/PTK2/BAG4/THBS1/PRKCE/AKAP12/DDR2	7
BP	GO:0043584	nose development	7/3781	15/18723	0.018975	0.113971	0.0925392	RPGRIP1L/SMCHD1/GLI3/SIX4/CHD7/ASCL1/SIX1	7
BP	GO:0071428	rRNA-containing ribonucleoprotein complex export from nucleus	7/3781	15/18723	0.018975	0.113971	0.0925392	XPO1/NOP9/NMD3/TSC1/LSG1/SDAD1/ABCE1	7
BP	GO:0071599	otic vesicle development	7/3781	15/18723	0.018975	0.113971	0.0925392	CEP290/AHI1/GATA3/STOX1/FGFR2/FGF10/SIX1	7
BP	GO:1904380	endoplasmic reticulum mannose trimming	7/3781	15/18723	0.018975	0.113971	0.0925392	MARCHF6/EDEM3/UGGT1/EDEM1/UGGT2/RNF139/AMFR	7
BP	GO:0022613	ribonucleoprotein complex biogenesis	112/3781	463/18723	0.0189767	0.113971	0.0925392	DHX9/WDR36/YTHDC1/SRFBP1/SCAF11/SF3B1/MTREX/SRSF10/GEMIN5/DDX3X/CELF1/CPSF6/XRN2/ERI2/KRR1/SNRNP200/SRPK2/XPO1/CDC73/DHX29/METTL15/XRCC5/CUL4B/TRMT61B/UTP15/PRMT5/NSUN3/ATR/NOP9/SETX/EFL1/DROSHA/SF3A1/FASTKD2/SLU7/EIF3A/SRSF1/NCBP1/NOL8/DDX18/DDX20/NUDT21/DIS3/HEATR1/PRPF8/CRNKL1/ZCCHC4/EXOSC10/NMD3/TSC1/GTPBP10/DENR/DDX17/AGO1/EIF4B/SHQ1/ESF1/PRKDC/EIF5/UTP20/FCF1/METTL16/DICER1/RBMXL1/ADAR/LSG1…	112
BP	GO:0030307	positive regulation of cell growth	45/3781	166/18723	0.0190123	0.114074	0.092623	USP47/ADNP/DDX3X/ADNP2/TRIM32/INO80/EIF4G2/MTOR/PAFAH1B1/BMPR2/MTPN/NCBP1/TAF9B/GOLGA4/MACF1/ADAM17/CDKN2AIP/ADAM10/CYFIP1/ITSN2/SHTN1/N6AMT1/RAB11A/RPTOR/CDKL5/SLC23A2/BCL2/NEDD4L/SEMA5A/TGFBR1/DDX39B/MAPT/WNT3/MAP1B/CYBA/FN1/LRP1/TGFB2/S100A8/SYT1/SLC44A4/SYT17/HPN/ERBB2/S100A9	45
BP	GO:0007626	locomotory behavior	48/3781	179/18723	0.0192766	0.115436	0.0937289	GIGYF2/PUM1/ALS2/UBE3A/SPG11/CLCN3/MTOR/PAFAH1B1/NCOA2/STRN/NCOR1/ATP7A/CRBN/ZMPSTE24/VPS13A/BTBD9/PPP3CB/TSC1/OXR1/EPS8/UBA6/MECP2/ZFHX3/ARCN1/PTEN/ADAM22/DDHD2/APH1B/INPP5F/NPC1/PRKCE/PPT1/HIPK2/ABCA2/ABAT/ARRDC3/GLRB/NAV2/SELENOP/CHD7/KCND2/APOE/SLITRK6/NR4A2/SLURP1/EN1/ADCY5/SLC1A1	48
BP	GO:1901991	negative regulation of mitotic cell cycle phase transition	48/3781	179/18723	0.0192766	0.115436	0.0937289	GIGYF2/USP47/APC/RAD17/CDC73/TAOK1/SDE2/TPR/DLG1/RBL2/ABRAXAS1/WAC/RINT1/CTDSP2/TOPBP1/NBN/PRKDC/BRCC3/WEE1/TAOK3/MRE11/CDK5RAP2/RB1/CTDSPL/ZWILCH/BRCA1/PKD2/PTEN/ATM/ZNF655/KNTC1/MDM2/RFWD3/BCL2/BUB3/RAD21/FOXN3/KANK2/CCND1/CDKN1B/RBL1/SOX4/E2F7/BUB1B/DTL/ZFP36L2/PLK2/CENPF	48
BP	GO:0050803	regulation of synapse structure or activity	57/3781	218/18723	0.0193481	0.115751	0.0939852	ADNP/CAPRIN1/UBE3A/DHX36/OPA1/PAFAH1B1/SETD5/DAG1/ABI2/DLG5/MAPK14/DCTN1/CHMP2B/ABL1/ADAM10/CYFIP1/DNM1L/ACTR2/NEDD4/ITSN1/EEF2K/HSPA8/FARP1/VPS35/ABHD17B/SIX4/CDKL5/PTEN/PPP1R9A/SYNGAP1/TANC2/ZMYND8/CLSTN2/SEPTIN11/TPBG/PDLIM5/PPT1/AMIGO1/HOMER1/THBS2/SEMA3F/PTPRS/TIAM1/SYBU/AMIGO2/LRRN1/WNT5A/FLRT3/SRCIN1/GPC4/APOE/SLITRK6/NTRK2/OXTR/NEURL1/SIX1/CBLN2	57
BP	GO:0060348	bone development	54/3781	205/18723	0.0194237	0.116092	0.0942614	SMAD5/PTPN11/TRIP11/BBX/MBTPS2/EP300/PAFAH1B1/BMPR2/ZMPSTE24/MAPK14/ASXL1/BPNT2/DYM/NOTCH2/AKAP13/CTC1/SMAD1/SLC10A7/GLI3/NSD2/RAB23/WASF2/TULP3/TAPT1/DCHS1/MED1/CHSY1/FOXN3/NAB1/XYLT1/TRIM45/PDGFC/AXIN2/SH3PXD2B/MMP16/TFAP2A/GJA1/FBN1/SULF1/GHR/CITED2/TEK/TGFB3/STC1/RANBP3L/RARA/LRRC17/FGFR2/BMPR1B/GREM1/LOX/MSX2/FGFR3/CHAD	54
BP	GO:0007031	peroxisome organization	13/3781	36/18723	0.0195708	0.116744	0.0947915	PEX1/ABCD3/DNM1L/PEX12/PEX19/ZFAND6/PEX2/MAVS/LONP2/PEX5/TMEM135/RAB8B/PEX11A	13
BP	GO:0045738	negative regulation of DNA repair	13/3781	36/18723	0.0195708	0.116744	0.0947915	TP53BP1/RIF1/TRIP12/UBR5/ERCC6/RNF169/SHLD2/SMCHD1/TFIP11/KLHL15/OTUB2/HELB/UBQLN4	13
BP	GO:0003179	heart valve morphogenesis	18/3781	55/18723	0.0197784	0.117756	0.0956128	ROCK1/MTOR/BMPR2/SMAD4/BMPR1A/NOTCH2/RB1/ROCK2/ACVR1/DCHS1/MDM2/MDM4/SOX4/GATA3/SLIT2/TGFB2/SLIT3/OLFM1	18
BP	GO:0006414	translational elongation	18/3781	55/18723	0.0197784	0.117756	0.0956128	GFM1/LTN1/NEMF/DNAJC24/EFL1/USP16/SEPSECS/SECISBP2/SECISBP2L/SELENOT/ASCC3/EEF2K/DPH1/CPEB3/CPEB2/HBS1L/SRP9/EEF1A2	18
BP	GO:0072080	nephron tubule development	27/3781	91/18723	0.0200388	0.119191	0.0967782	DLG1/GZF1/SMAD4/CTNNB1/PBX1/FMN1/NOTCH2/GLI3/SIX4/DCHS1/PKD2/AHI1/BCL2/YAP1/PKD1/NPNT/GREB1L/GATA3/LGR4/LAMA5/MTSS1/WNK4/FGF1/GREM1/GPC3/SIX1/TFAP2B	27
BP	GO:0030218	erythrocyte differentiation	34/3781	120/18723	0.0202049	0.119644	0.0971461	SMAD5/SP3/RCOR1/ARID4A/KMT2E/ARNT/UFL1/MAPK14/PTBP3/PRKDC/RBFOX2/SLC11A2/TMOD3/ADAR/ACVR1B/SMAP1/STAT3/KAT7/HSPA9/ABCB10/RB1/FOXO3/FLVCR1/MED1/NCAPG2/KLF13/STAT5B/HIPK2/GATA3/ADGRF5/INHBA/CITED2/TGFBR3/ISG15	34
BP	GO:0048593	camera-type eye morphogenesis	34/3781	120/18723	0.0202049	0.119644	0.0971461	NF1/SP3/HIPK1/TOPORS/ABI2/PHACTR4/CTNNB1/FRS2/RPGRIP1L/NOTCH2/TTC8/GLI3/ZHX2/BBS4/TDRD7/MAN2A1/SHROOM2/AHI1/THRB/HIPK2/TFAP2A/BCAR3/PTPRM/WNT5A/CITED2/TENM3/WNT9A/FAT1/COL8A1/NTRK2/COL8A2/SLC1A1/AQP5/TFAP2B	34
BP	GO:0033182	regulation of histone ubiquitination	6/3781	12/18723	0.0202892	0.119644	0.0971461	CTR9/RNF20/TRIP12/UBR5/RNF40/OTUB2	6
BP	GO:0035112	genitalia morphogenesis	6/3781	12/18723	0.0202892	0.119644	0.0971461	NIPBL/CTNNB1/AR/SYCP2/TP63/FGF10	6
BP	GO:0042762	regulation of sulfur metabolic process	6/3781	12/18723	0.0202892	0.119644	0.0971461	SP1/ABCB7/NFE2L2/PDK3/PDK2/PDK4	6
BP	GO:0046831	regulation of RNA export from nucleus	6/3781	12/18723	0.0202892	0.119644	0.0971461	DHX9/SETD2/CPSF6/TPR/NUP153/SUPT6H	6
BP	GO:0051095	regulation of helicase activity	6/3781	12/18723	0.0202892	0.119644	0.0971461	SIRT1/MSH3/POT1/MSH6/MSH2/MCM2	6
BP	GO:0070816	phosphorylation of RNA polymerase II C-terminal domain	6/3781	12/18723	0.0202892	0.119644	0.0971461	GTF2H3/CDK13/GTF2H1/CCNK/PPIL4/CDK12	6
BP	GO:0090557	establishment of endothelial intestinal barrier	6/3781	12/18723	0.0202892	0.119644	0.0971461	RAPGEF2/TJP1/AFDN/RAP2C/PTPRS/FASN	6
BP	GO:0072171	mesonephric tubule morphogenesis	20/3781	63/18723	0.0204209	0.120078	0.0974978	DLG1/GZF1/SMAD4/CTNNB1/PBX1/FMN1/GLI3/SIX4/DCHS1/PKD2/BCL2/NPNT/GREB1L/GATA3/LGR4/LAMA5/FGF1/GREM1/GPC3/SIX1	20
BP	GO:1902373	negative regulation of mRNA catabolic process	20/3781	63/18723	0.0204209	0.120078	0.0974978	DHX9/THRAP3/HNRNPU/NBAS/MTOR/MAPK14/ANGEL2/LARP1/METTL16/PAIP1/FMR1/SECISBP2/SYNCRIP/TIRAP/TENT4B/NOCT/AXIN2/TOB1/TRAF5/RBM24	20
BP	GO:1904589	regulation of protein import	20/3781	63/18723	0.0204209	0.120078	0.0974978	NUP58/UBR5/TPR/RBM22/MAPK1/MAPK14/EFCAB7/NUP54/PSEN1/SUFU/IPO5/NOLC1/HSPA8/GLI3/ECT2/RAB23/MAVS/SMAD3/PIK3R1/CDH1	20
BP	GO:0050772	positive regulation of axonogenesis	24/3781	79/18723	0.0205608	0.120767	0.0980573	ADNP/EIF4G2/PAFAH1B1/BMPR2/GOLGA4/MACF1/CYFIP1/TRAK1/NIN/SHTN1/RAB11A/SKIL/CDKL5/SEMA5A/AMIGO1/SLIT2/MAPT/TIAM1/PLXNC1/WNT3/MAP1B/FN1/LRP1/NTRK2	24
BP	GO:0016445	somatic diversification of immunoglobulins	21/3781	67/18723	0.0205772	0.120767	0.0980573	TP53BP1/RIF1/PMS2/MSH3/PAXIP1/MCM3AP/KMT5B/SHLD2/NBN/PRKDC/MLH1/MSH6/NDFIP1/SUPT6H/LIG4/RNF168/NSD2/MSH2/SWAP70/TFRC/TNFSF13	21
BP	GO:1903363	negative regulation of cellular protein catabolic process	23/3781	75/18723	0.020635	0.12084	0.0981167	TAF1/MARCHF7/USP7/SMARCC1/RYBP/WAC/BAG5/USP19/RGP1/PSEN1/SUFU/OPHN1/RIC1/STYX/USP14/OGT/TLK2/SVIP/USP25/ALAD/HIPK2/MAP1A/HFE	23
BP	GO:0098732	macromolecule deacylation	33/3781	116/18723	0.0206465	0.12084	0.0981167	SMARCAD1/REST/SIN3A/NIPBL/SUDS3/SIRT1/KDM5A/BAZ2A/RCOR1/EP300/MIER1/C6orf89/DYRK1A/MAPK8/MIDEAS/TBL1XR1/ELK4/RCOR3/PER2/ABHD13/LYPLA1/SPRED2/ABHD17B/FRY/TBL1X/NCAPG2/PPT1/SPRED1/TRERF1/PRKAA1/MAPT/PRKAA2/SREBF1	33
BP	GO:0055123	digestive system development	38/3781	137/18723	0.0206483	0.12084	0.0981167	CHD8/NIPBL/VPS52/CRKL/YIPF6/EPB41L5/WDR19/SMAD2/CTNNB1/CBFA2T2/BBS7/SRP54/GLI3/IL6ST/RB1/SAV1/DCHS1/AHI1/SMAD3/BCL2/YAP1/PKD1/SLC4A2/PDGFC/LGR4/WNT5A/RET/TGFB3/TGFB2/COBL/FGFR2/WLS/AGR2/OXTR/TP63/ASCL1/FGF10/SPDEF	38
BP	GO:0031297	replication fork processing	14/3781	40/18723	0.0209042	0.121991	0.0990511	ATRX/BOD1L1/PRIMPOL/FANCM/ATR/ETAA1/EXD2/WRN/NUCKS1/MRE11/RFWD3/FAM111A/BRCA2/DNA2	14
BP	GO:0045022	early endosome to late endosome transport	14/3781	40/18723	0.0209042	0.121991	0.0990511	PIK3C3/HOOK1/DNAJC13/LMTK2/EEA1/BECN1/MAPK1/CHMP3/RAB21/KIF16B/HOOK3/SNX16/RDX/EMP2	14
BP	GO:2000142	regulation of DNA-templated transcription, initiation	14/3781	40/18723	0.0209042	0.121991	0.0990511	CREB1/BCLAF1/CAND1/DHX36/ERCC6/MED14/PAXIP1/SETX/ATF7IP/MED13/MED12/MED1/PPM1D/ESR1	14
BP	GO:0010592	positive regulation of lamellipodium assembly	11/3781	29/18723	0.0210203	0.122437	0.0994134	MTOR/NCKAP1/ABI2/ATP7A/PIK3CA/CYFIP1/OCLN/ACTR2/AKIRIN1/WASF2/PIK3R1	11
BP	GO:0034067	protein localization to Golgi apparatus	11/3781	29/18723	0.0210203	0.122437	0.0994134	GCC2/RAB33B/VPS13A/VPS13D/GBF1/VPS13C/GOLPH3/TMED10/SORL1/ARL5B/PAQR3	11
BP	GO:0006997	nucleus organization	37/3781	133/18723	0.0211793	0.123247	0.100071	NUP98/SMARCA5/SIRT1/UBXN2B/SRPK2/VPS4B/NUP133/BAZ2A/LEMD3/TPR/PAFAH1B1/TMF1/POLR1B/TOR1AIP1/KDM3A/NUP153/NUP155/SPAST/ZMPSTE24/PHF2/DCTN1/CHMP2B/PHF8/AHCTF1/NEMP1/NUP54/ATXN7/REEP3/NUP205/NDC1/NOLC1/PARP11/USPL1/NUP107/NUMA1/HIPK2/GOLM1	37
BP	GO:0006359	regulation of transcription by RNA polymerase III	9/3781	22/18723	0.0213289	0.12342	0.100212	CHD8/ZNF143/ICE1/DHX36/ICE2/MTOR/RPTOR/BRF2/AR	9
BP	GO:0006379	mRNA cleavage	9/3781	22/18723	0.0213289	0.12342	0.100212	CPSF6/CPSF2/NCBP1/NUDT21/PCF11/CSTF2T/CSTF2/ERN1/AGO2	9
BP	GO:0032727	positive regulation of interferon-alpha production	9/3781	22/18723	0.0213289	0.12342	0.100212	DHX9/SETD2/DDX3X/CHUK/DHX36/TBK1/MAVS/TLR3/DDX58	9
BP	GO:0034755	iron ion transmembrane transport	9/3781	22/18723	0.0213289	0.12342	0.100212	ABCB7/ATP7A/SLC11A2/SLC39A14/ABCC5/SLC40A1/HFE/STEAP2/LCN2	9
BP	GO:0043574	peroxisomal transport	9/3781	22/18723	0.0213289	0.12342	0.100212	PEX1/ABCD3/PEX12/PEX19/ZFAND6/PEX2/LONP2/PEX5/RAB8B	9
BP	GO:2000114	regulation of establishment of cell polarity	9/3781	22/18723	0.0213289	0.12342	0.100212	ROCK1/RICTOR/ARFGEF1/RAP1B/SHTN1/KIF20B/ROCK2/BCAS3/GATA3	9
BP	GO:0060324	face development	15/3781	44/18723	0.0219549	0.126923	0.103056	NIPBL/PTPN11/RAF1/EP300/MAPK1/GRHL2/RAB3GAP1/SGPL1/TIPARP/ARID5B/CHD7/WNT5A/TGFB3/RARA/CRISPLD1	15
BP	GO:2000027	regulation of animal organ morphogenesis	35/3781	125/18723	0.0222527	0.128525	0.104357	SEC24B/BTBD7/MED12/CTNNB1/ABL1/FRS2/RYK/BMPR1A/DAAM1/VANGL1/SIX4/ZNRF3/CELSR1/CELSR2/AHI1/SMURF2/FZD3/MLLT3/GATA3/AR/LGR4/FZD6/SULF1/TIAM1/WNT5A/STOX1/CITED2/NTN4/FGF1/GPC4/GREM1/TNFRSF11B/GPC3/FGF10/SIX1	35
BP	GO:0042149	cellular response to glucose starvation	16/3781	48/18723	0.0227629	0.130982	0.106352	PIK3R4/PIK3C3/IMPACT/BECN1/ATG14/CPEB4/EIF2AK3/NFE2L2/FOXO3/NUAK1/BCL2/XBP1/PRKAA1/PMAIP1/PRKAA2/SESN3	16
BP	GO:0045005	DNA-dependent DNA replication maintenance of fidelity	16/3781	48/18723	0.0227629	0.130982	0.106352	ATRX/BOD1L1/PRIMPOL/FANCM/ATR/ETAA1/EXD2/MCM9/WRN/NUCKS1/MRE11/RFWD3/TIMELESS/FAM111A/BRCA2/DNA2	16
BP	GO:1903053	regulation of extracellular matrix organization	16/3781	48/18723	0.0227629	0.130982	0.106352	CLASP2/CLASP1/DAG1/ABL1/RIC1/RB1/SMAD3/RUNX1/DDR1/PHLDB1/PHLDB2/ANTXR1/SLC2A10/DDR2/FAP/LRP1	16
BP	GO:2000059	negative regulation of ubiquitin-dependent protein catabolic process	16/3781	48/18723	0.0227629	0.130982	0.106352	TAF1/USP7/SMARCC1/RYBP/WAC/BAG5/PSEN1/SUFU/STYX/USP14/OGT/TLK2/SVIP/HIPK2/MAP1A/HFE	16
BP	GO:0048706	embryonic skeletal system development	34/3781	121/18723	0.0227922	0.131028	0.106389	NIPBL/SETD2/SP3/DLG1/WDR19/MED12/GRHL2/SMAD2/CTNNB1/PBX1/MBTD1/KIAA1217/DYNC2I1/GLI3/NDST1/TULP3/TAPT1/SIX4/FLVCR1/SMAD3/IFT140/XYLT1/BMI1/TGFBR1/MMP16/TFAP2A/SLC2A10/SULF1/WNT5A/TGFB3/WNT9A/FGFR2/COL11A1/SIX1	34
BP	GO:0001881	receptor recycling	12/3781	33/18723	0.0230955	0.13228	0.107406	ALS2/ARFGEF2/AP1AR/LMTK2/EPS15/PSEN1/NSF/KIF16B/SORL1/INPP5F/TBC1D16/ECE1	12
BP	GO:0003382	epithelial cell morphogenesis	12/3781	33/18723	0.0230955	0.13228	0.107406	EPB41L5/GRHL2/FLNB/SIPA1L3/ARHGEF26/CLIC4/PALLD/CCDC88C/HEG1/AR/STC1/FAT1	12
BP	GO:0043552	positive regulation of phosphatidylinositol 3-kinase activity	12/3781	33/18723	0.0230955	0.13228	0.107406	PIK3R4/AMBRA1/ATG14/PTK2/VAV2/IRS1/VAV3/PDGFRB/TEK/FGFR3/FLT3/CCL19	12
BP	GO:0060260	regulation of transcription initiation from RNA polymerase II promoter	12/3781	33/18723	0.0230955	0.13228	0.107406	CREB1/CAND1/DHX36/ERCC6/MED14/PAXIP1/ATF7IP/MED13/MED12/MED1/PPM1D/ESR1	12
BP	GO:1902806	regulation of cell cycle G1/S phase transition	45/3781	168/18723	0.0232871	0.133254	0.108197	GIGYF2/TAF1/APPL1/DDX3X/APC/INO80/CDC73/ANKRD17/SDE2/DLG1/RBL2/KMT2E/WAC/CTDSP2/LSM11/ADAM17/APPL2/PRKDC/PSME3/ECD/WEE1/CUL4A/STXBP4/RB1/CTDSPL/RPTOR/PKD2/PTEN/ATM/ZNF655/MDM2/RFWD3/BCL2/ATP2B4/PKD1/KANK2/CCND1/CDKN1B/RBL1/RDX/SOX4/E2F7/PLK2/TCIM/FGF10	45
BP	GO:1903828	negative regulation of cellular protein localization	33/3781	117/18723	0.0233311	0.133324	0.108253	SIN3A/HECTD1/UBXN2B/LATS1/GSK3B/POLR1A/TTBK2/CTNNA1/LMAN1/OTUD7B/LZTFL1/TERF1/SUFU/ERLEC1/LYPLA1/GOPC/ROCK2/RAB23/LEPROT/ABHD17B/BARD1/CLTC/PPFIA1/BAG4/SVIP/NEDD4L/PPP2R5A/MAP1A/ASTN2/MAPT/DCLK1/TMEM98/LRRC15	33
BP	GO:0030514	negative regulation of BMP signaling pathway	17/3781	52/18723	0.023364	0.133324	0.108253	CTDSPL2/LEMD3/TRIM33/UBE2D3/ABL1/SKIL/TWSG1/SORL1/CRIM1/SMURF2/HIPK2/SPART/TOB1/FBN1/LRP2/WNT5A/GREM1	17
BP	GO:0034204	lipid translocation	17/3781	52/18723	0.023364	0.133324	0.108253	TMEM30A/ATP9A/ANO6/ATP8B1/ATP9B/ATP10D/TMEM30B/ABCC1/ABCA1/ABCA2/ATP11C/PLSCR4/ABCA3/ATP8B2/ABCG1/ATP11B/KCNN4	17
BP	GO:2001236	regulation of extrinsic apoptotic signaling pathway	41/3781	151/18723	0.0236576	0.134753	0.109413	DDX3X/BIRC6/ZMYND11/RAF1/FEM1B/PHIP/GSK3B/PAK2/RB1CC1/EYA3/CTNNA1/HTT/PSME3/MADD/SH3RF1/RFFL/ITGAV/SKIL/STK4/ACVR1/BRCA1/PTEN/THBS1/GCLC/BCL2/STK3/GCLM/YAP1/TGFBR1/SIAH2/UNC5B/AR/PMAIP1/INHBA/FGFR1/TIMP3/RET/DEPTOR/BMPR1B/ITGA6/FGF10	41
BP	GO:0002088	lens development in camera-type eye	25/3781	84/18723	0.023658	0.134753	0.109413	HIPK1/DLG1/ABI2/KDM5B/CTNNB1/FRS2/TBC1D32/SPRED2/TDRD7/SKIL/MED1/SHROOM2/SMAD3/HIPK2/SPRED1/NHS/CDKN1B/TGFBR1/GATA3/CRYBG3/BCAR3/WNT5A/CITED2/FAT1/SLITRK6	25
BP	GO:0001658	branching involved in ureteric bud morphogenesis	18/3781	56/18723	0.0237892	0.135375	0.109919	DLG1/GZF1/SMAD4/CTNNB1/PBX1/GLI3/SIX4/DCHS1/PKD2/BCL2/NPNT/GREB1L/LGR4/LAMA5/FGF1/GREM1/GPC3/SIX1	18
BP	GO:0044344	cellular response to fibroblast growth factor stimulus	32/3781	113/18723	0.0238673	0.135695	0.110178	PTPN11/RAB14/DSTYK/SETX/CRKL/KDM5B/CTNNB1/FRS2/CDC5L/SHOC2/KIF16B/NDST1/NPTN/CHURC1/THBS1/GCLC/GCLM/GATA3/SULF1/POSTN/ZFP36L2/FGFR1/WNT5A/FGF1/FLRT3/FGFR2/SHISA2/CCL5/EGR3/FGFR3/FGF10/CXCL13	32
BP	GO:0032272	negative regulation of protein polymerization	24/3781	80/18723	0.0238989	0.135749	0.110223	TWF1/ARFGEF1/CAPZA2/MTPN/DYRK1A/SSH1/ADD1/EPS8/TMOD3/SPTAN1/SPTBN1/CARMIL1/SSH2/FKBP4/CRACD/SVIL/MYADM/RDX/SLIT2/TMSB10/FHOD3/SSH3/INPP5J/ADD3	24
BP	GO:0042306	regulation of protein import into nucleus	19/3781	60/18723	0.0240651	0.136317	0.110684	NUP58/UBR5/TPR/RBM22/MAPK1/MAPK14/EFCAB7/NUP54/PSEN1/SUFU/IPO5/NOLC1/GLI3/ECT2/RAB23/MAVS/SMAD3/PIK3R1/CDH1	19
BP	GO:0051851	modulation by host of symbiont process	19/3781	60/18723	0.0240651	0.136317	0.110684	CCNT1/REST/SP1/YTHDC2/EP300/NAPEPLD/EIF2AK4/CHD1/CCNK/FMR1/NUCKS1/HSPA8/IGF2R/FBXL2/STOM/CX3CR1/APOE/CCL5/HPN	19
BP	GO:0060038	cardiac muscle cell proliferation	19/3781	60/18723	0.0240651	0.136317	0.110684	ARID2/PRKAR1A/MAPK1/MAPK14/VGLL4/BMPR1A/SMAD1/SAV1/PTEN/JARID2/YAP1/RUNX1/ERBB4/TGFBR1/GJA1/CITED2/TGFB2/FGFR2/TGFBR3	19
BP	GO:0005977	glycogen metabolic process	22/3781	72/18723	0.0242098	0.136914	0.111168	MTOR/GSK3B/RB1CC1/PHKA2/EPM2AIP1/PTGES3/PER2/PHKA1/AGL/IL6ST/PPP1R2/PHKB/ACADM/IRS1/PFKM/GBE1/INSR/ENPP1/LEPR/SORBS1/PPP1R3B/PPP1R3C	22
BP	GO:0050771	negative regulation of axonogenesis	20/3781	64/18723	0.0242147	0.136914	0.111168	DIP2B/RYK/RNF6/PSEN1/ULK2/TRAK2/SEMA4F/PTEN/SEMA3C/SYNGAP1/SEMA5A/SPART/SEMA3F/SEMA4B/PTPRS/WNT3/SEMA6D/WNT5A/SEMA3E/SEMA3B	20
BP	GO:0072009	nephron epithelium development	31/3781	109/18723	0.0243983	0.137697	0.111804	DLG1/GZF1/SMAD4/IQGAP1/CTNNB1/ASXL1/PBX1/FMN1/NOTCH2/GLI3/SIX4/DCHS1/PKD2/AHI1/BCL2/YAP1/PKD1/NPNT/GREB1L/GATA3/PODXL/LGR4/LAMA5/LAMB2/MTSS1/WNK4/FGF1/GREM1/GPC3/SIX1/TFAP2B	31
BP	GO:0000729	DNA double-strand break processing	8/3781	19/18723	0.0245355	0.137697	0.111804	SMARCAD1/EXD2/SLX4/MRE11/HELB/RBBP8/DNA2/BRIP1	8
BP	GO:0030050	vesicle transport along actin filament	8/3781	19/18723	0.0245355	0.137697	0.111804	WASL/MYO6/FNBP1L/MYO5C/MYO5B/MYO5A/MYO1D/MYO1B	8
BP	GO:0035313	wound healing, spreading of epidermal cells	8/3781	19/18723	0.0245355	0.137697	0.111804	CLASP2/MTOR/CLASP1/RREB1/ADAM17/PTEN/PHLDB2/FERMT2	8
BP	GO:0036498	IRE1-mediated unfolded protein response	8/3781	19/18723	0.0245355	0.137697	0.111804	UFL1/BCL2L11/TMEM33/VAPB/PTPN1/ERN1/XBP1/AGR2	8
BP	GO:0044827	modulation by host of viral genome replication	8/3781	19/18723	0.0245355	0.137697	0.111804	YTHDC2/EIF2AK4/CCNK/FMR1/NUCKS1/HSPA8/FBXL2/STOM	8
BP	GO:0060039	pericardium development	8/3781	19/18723	0.0245355	0.137697	0.111804	SETD2/SMAD2/RPGRIP1L/SOS1/SMAD3/HEG1/WNT5A/FLRT3	8
BP	GO:0034643	establishment of mitochondrion localization, microtubule-mediated	10/3781	26/18723	0.0246604	0.137697	0.111804	OPA1/RHOT1/LRPPRC/SPAST/TRAK1/TRAK2/ARMCX3/MAPT/SYBU/MAP1B	10
BP	GO:0047497	mitochondrion transport along microtubule	10/3781	26/18723	0.0246604	0.137697	0.111804	OPA1/RHOT1/LRPPRC/SPAST/TRAK1/TRAK2/ARMCX3/MAPT/SYBU/MAP1B	10
BP	GO:0051016	barbed-end actin filament capping	10/3781	26/18723	0.0246604	0.137697	0.111804	TWF1/CAPZA2/MTPN/ADD1/EPS8/CARMIL1/CRACD/SVIL/RDX/ADD3	10
BP	GO:0060037	pharyngeal system development	10/3781	26/18723	0.0246604	0.137697	0.111804	BMPR2/BMPR1A/ACVR1/SIX4/TGFBR1/ECE1/GATA3/ADGRF5/TGFB2/SIX1	10
BP	GO:0097066	response to thyroid hormone	10/3781	26/18723	0.0246604	0.137697	0.111804	BRD8/CAB39/MED1/GCLC/GCLM/THRB/RDX/KLF9/HPN/F7	10
BP	GO:0097205	renal filtration	10/3781	26/18723	0.0246604	0.137697	0.111804	TBC1D8B/F2R/RHPN2/GJA1/ADGRF5/EMP2/SULF1/ITGA3/CYBA/TMEM63C	10
BP	GO:0033363	secretory granule organization	13/3781	37/18723	0.0247321	0.137697	0.111804	CREB1/AP3B1/PAFAH1B1/TMF1/OSBP/SNX19/LYST/ABCA1/KNL1/F2R/ABCG1/BAIAP3/RAB38	13
BP	GO:0071985	multivesicular body sorting pathway	13/3781	37/18723	0.0247321	0.137697	0.111804	VPS4B/RUBCN/CHMP3/CHMP2B/STAM/VPS36/SYTL4/TMEM50B/LYST/VTA1/LEPROT/RAB27B/SORT1	13
BP	GO:0090218	positive regulation of lipid kinase activity	13/3781	37/18723	0.0247321	0.137697	0.111804	PIK3R4/AMBRA1/ATG14/PTK2/VAV2/IRS1/VAV3/PDGFRB/TEK/FGFR3/FLT3/EEF1A2/CCL19	13
BP	GO:1902745	positive regulation of lamellipodium organization	13/3781	37/18723	0.0247321	0.137697	0.111804	MTOR/NCKAP1/ABI2/ATP7A/RREB1/PIK3CA/CYFIP1/OCLN/ACTR2/AKIRIN1/CARMIL1/WASF2/PIK3R1	13
BP	GO:0023061	signal release	111/3781	463/18723	0.0248316	0.138127	0.112153	CREB1/REST/PREPL/SNX4/CLOCK/PTPN11/RAF1/GSK3B/KIF5B/RHOT1/RAB11FIP2/TMF1/BLOC1S6/ATP2A2/OSBP/STXBP3/HMGCR/SMAD4/CCDC186/KDM5B/SNAP23/PPP3CB/SMAD2/SNX19/CRY1/RAB3GAP1/SYNJ1/FMR1/DNM1L/LIN7C/PSEN1/RAP1B/RAB11FIP1/SELENOT/ITSN1/SLC30A1/PER2/SNAP29/SYTL4/CYB5R4/STXBP4/ARNTL/PCLO/GLUD1/CASK/TM7SF3/BACE1/IRS1/PPP1R9A/PFKM/RFX3/UNC13B/ILDR1/MYB/CTBP2/FBXL20/STXBP5/CRY2/PRKCE/PPT1/RAB8B/RAPGEF4/ABCA1/NAP…	111
BP	GO:1901361	organic cyclic compound catabolic process	118/3781	495/18723	0.0249303	0.138551	0.112498	GIGYF2/DHX9/PUM1/TTC37/PUM2/THRAP3/DCP1A/MTREX/METTL14/SMG1/HNRNPR/CNOT6/CELF1/XRN2/ZC3H14/PHAX/HNRNPU/ROCK1/DHX36/YTHDF3/GSPT1/NBAS/TNRC6A/MTOR/PDE12/ETF1/DCP2/DROSHA/CNOT6L/SMG6/RC3H2/FASTKD2/LRPPRC/TENT2/CNOT1/NCBP1/DIS3/MAPK14/FASTKD3/ANGEL2/SMG7/EXOSC10/TET2/LARP1/PAN2/AGO1/CNOT8/PAN3/METTL16/PAIP1/DICER1/XRN1/ZC3HAV1/FMR1/FXR1/MLH1/RC3H1/PNRC2/SECISBP2/NAF1/SMG8/TDG/TUT7/DIS3L/AGO4/AGO3/EDC…	118
BP	GO:0031929	TOR signaling	35/3781	126/18723	0.0249881	0.138748	0.112657	SMG1/SIRT1/LARS1/SMCR8/FNIP1/RICTOR/UBR1/MTOR/UBR2/WAC/TBCK/ZMPSTE24/TSC1/PIK3CA/LARP1/RFFL/GOLPH3/MIOS/LAMTOR3/TTI1/EIF4EBP2/ARNTL/RRAGB/RPTOR/ATM/SIK3/RPS6KB1/SH3BP4/PRKAA1/GATA3/RNF152/GPR137B/PRKAA2/DEPTOR/SESN3	35
BP	GO:0007389	pattern specification process	105/3781	436/18723	0.0252677	0.140175	0.113816	SMAD5/TASOR/MIB1/RNF111/APC/POFUT1/HIPK1/BPTF/KIF3B/PALB2/ARL13B/EP300/ARL6/INTU/BMPR2/CRKL/SMAD4/EPB41L5/WDR19/MED12/AIDA/SMAD2/BCOR/CTNNB1/TTC21B/ACVR2B/PBX1/FRS2/PRKDC/RPGRIP1L/SHROOM3/DYNC2H1/TBC1D32/BMPR1A/PSEN1/SUFU/C2CD3/NOTCH2/DYNC2LI1/BBS7/LRP6/ATP6AP2/CC2D2A/SMAD1/TTC8/GLI3/BBS4/TCTN1/RNF2/TULP3/ACVR1/TSHZ1/DCHS1/PKD2/IFT74/SEMA3C/CELSR2/SYNGAP1/GORAB/AHI1/MICAL2/SMAD3/RFX3/CHSY1/PCSK6/…	105
BP	GO:0048568	embryonic organ development	103/3781	427/18723	0.0253956	0.140707	0.114248	NIPBL/SEC24B/MIB1/SETD2/ARID2/HECTD1/WDR48/SP3/BIRC6/HIPK1/PRKRA/RBBP6/BPTF/VPS52/MYO6/PALB2/ARL13B/DLG1/TEAD1/GGNBP2/TBC1D23/FBXW8/RAD23B/ARNT/MAPK1/PHACTR4/CEP290/WDR19/MED12/GRHL2/SMAD2/CTNNB1/KMT2A/PBX1/FRS2/BMPR1A/PSEN1/SUFU/C2CD3/ZNF568/NOTCH2/UTP25/NCOA1/BBS7/DYNC2I1/CC2D2A/GLI3/BBS4/NDST1/TULP3/PLS1/STK4/ACVR1/SIX4/FLVCR1/TSHZ1/PKD2/MED1/LRIG1/AHI1/MICAL2/SMAD3/STK3/GRB2/KITLG/YAP1/IFT140…	103
BP	GO:0006476	protein deacetylation	29/3781	101/18723	0.025432	0.140707	0.114248	SMARCAD1/REST/SIN3A/NIPBL/SUDS3/SIRT1/KDM5A/BAZ2A/RCOR1/EP300/MIER1/C6orf89/DYRK1A/MAPK8/MIDEAS/TBL1XR1/ELK4/RCOR3/PER2/SPRED2/FRY/TBL1X/NCAPG2/SPRED1/TRERF1/PRKAA1/MAPT/PRKAA2/SREBF1	29
BP	GO:0048024	regulation of mRNA splicing, via spliceosome	29/3781	101/18723	0.025432	0.140707	0.114248	YTHDC1/REST/HNRNPK/THRAP3/SON/SRSF10/NUP98/CELF1/HNRNPU/SRPK2/RBM23/NCBP1/DYRK1A/DDX17/FAM172A/RBM25/METTL16/RBM39/RBFOX2/RBMXL1/FMR1/FXR1/NSRP1/HSPA8/RAVER1/MBNL2/RBM11/RBM24/NOVA1	29
BP	GO:0010038	response to metal ion	91/3781	373/18723	0.0259214	0.143287	0.116343	CREB1/CHUK/ATF1/SLC25A24/ARL13B/WNK1/MTF1/SLC30A5/BECN1/UBE2D3/ATP7A/MAPK1/MAPK8/AHCYL1/IQGAP1/FECH/BRAF/ADD1/SLC11A2/CARF/CPNE3/EIF2S1/NEDD4/SEC31A/EIF2AK3/SLC30A1/LIG4/MAPK9/EEF2K/MEF2A/NFE2L2/ECT2/NCSTN/PARP1/BACE1/ITPR3/PKD2/PTEN/THBS1/MDM2/GCLC/CAT/SLC12A2/BCL2/NPC1/ALAD/NEDD4L/PPP2CB/SLC30A4/ATP7B/GPHN/ANK3/CLIC4/TESMIN/ADAM9/CCND1/HOMER1/CDKN1B/ABAT/PPP3CA/TFAP2A/SLC41A1/PRKAA1/MAPT/PRKAA2…	91
BP	GO:0042307	positive regulation of protein import into nucleus	14/3781	41/18723	0.0259961	0.143443	0.116469	UBR5/TPR/RBM22/MAPK1/MAPK14/EFCAB7/PSEN1/IPO5/GLI3/ECT2/MAVS/SMAD3/PIK3R1/CDH1	14
BP	GO:0071634	regulation of transforming growth factor beta production	14/3781	41/18723	0.0259961	0.143443	0.116469	CREB1/ATF2/CD2AP/SMAD4/BMPR1A/CD46/ATP6AP2/ITGAV/THBS1/SMAD3/MYB/FN1/TGFB2/LUM	14
BP	GO:0050673	epithelial cell proliferation	105/3781	437/18723	0.0268077	0.147789	0.119998	SP1/NF1/WDR48/SUZ12/ATF2/SIRT1/CDC73/BTBD10/RICTOR/DLG1/PDPK1/MTOR/ZNF304/INTU/BMPR2/C6orf89/ATP7A/ARNT/MAPK1/KDM5B/RREB1/ADAM17/CTNNB1/SYNJ2BP/FRS2/PRKDC/AGGF1/PURA/BMPR1A/PSEN1/STAT3/NOTCH2/BTRC/THAP1/PDCD10/STXBP4/NCSTN/RB1/PEX2/SAV1/CASK/NRAS/BCL2L2/RPTOR/SIX4/IFT74/PTEN/MED1/THBS1/SMAD3/YAP1/MCC/LAMC1/SEMA5A/BRCA2/CCND1/CDH13/ESR1/IRF6/CDKN1B/GLUL/TGFBR1/ERN1/XBP1/GATA3/PGR/C5AR2/GJA1/KLF9/A…	105
BP	GO:0035384	thioester biosynthetic process	15/3781	45/18723	0.0269466	0.148027	0.120191	ACLY/DLAT/PDHX/DLD/ACACA/ACSL3/ELOVL5/HACD2/PDK3/PDK2/PPT1/ELOVL2/ELOVL6/ACACB/PDK4	15
BP	GO:0035987	endodermal cell differentiation	15/3781	45/18723	0.0269466	0.148027	0.120191	SETD2/CTR9/CDC73/RTF1/CTNNB1/ITGAV/LEO1/LAMA3/COL12A1/ITGB5/INHBA/FN1/COL5A2/COL8A1/COL11A1	15
BP	GO:0071616	acyl-CoA biosynthetic process	15/3781	45/18723	0.0269466	0.148027	0.120191	ACLY/DLAT/PDHX/DLD/ACACA/ACSL3/ELOVL5/HACD2/PDK3/PDK2/PPT1/ELOVL2/ELOVL6/ACACB/PDK4	15
BP	GO:0085029	extracellular matrix assembly	15/3781	45/18723	0.0269466	0.148027	0.120191	CLASP2/CLASP1/DAG1/ATP7A/THSD4/SMAD3/PHLDB1/PHLDB2/ANTXR1/PXDN/LAMB2/NTN4/LOX/COL1A2/MYH11	15
BP	GO:0007176	regulation of epidermal growth factor-activated receptor activity	11/3781	30/18723	0.0272815	0.149071	0.121039	SOCS4/ADAM17/SNX6/SOCS5/PSEN1/TSG101/CBL/SHC1/GPRC5A/AREG/NEURL1	11
BP	GO:0031571	mitotic G1 DNA damage checkpoint signaling	11/3781	30/18723	0.0272815	0.149071	0.121039	GIGYF2/SDE2/WAC/PRKDC/ATM/MDM2/RFWD3/CCND1/CDKN1B/SOX4/PLK2	11
BP	GO:0036258	multivesicular body assembly	11/3781	30/18723	0.0272815	0.149071	0.121039	VPS4B/STAM2/PDCD6IP/CHMP3/CHMP2B/STAM/TSG101/VPS36/VPS37A/RAB11A/VTA1	11
BP	GO:0044030	regulation of DNA methylation	11/3781	30/18723	0.0272815	0.149071	0.121039	PRMT5/ZMPSTE24/RLF/GRHL2/PIK3CA/KMT2A/MECP2/KDM1B/MPHOSPH8/PARP1/BRCA1	11
BP	GO:0045948	positive regulation of translational initiation	11/3781	30/18723	0.0272815	0.149071	0.121039	DDX3X/UHMK1/YTHDF3/IMPACT/DHX29/MTOR/EIF2AK4/LARP1/DNAJC3/RPS6KB1/CCL5	11
BP	GO:1900101	regulation of endoplasmic reticulum unfolded protein response	11/3781	30/18723	0.0272815	0.149071	0.121039	ATF6/UFL1/BCL2L11/PPP1R15B/TMEM33/PTPN1/WFS1/ERN1/PIK3R1/XBP1/AGR2	11
BP	GO:0014812	muscle cell migration	31/3781	110/18723	0.0275832	0.150454	0.122162	ROCK1/ATP7A/IQGAP1/SSH1/BMPR1A/GNA13/CRK/DOCK7/NFE2L2/AKIRIN1/ITGA2/PARVA/SIX4/SORL1/MDM2/BCL2/PRKG1/DDR1/DOCK4/SLIT2/NET1/PDGFD/POSTN/PDGFRB/SEMA6D/LRP1/IGFBP5/PLAT/THBS4/CCL5/SIX1	31
BP	GO:1904659	glucose transmembrane transport	31/3781	110/18723	0.0275832	0.150454	0.122162	APPL1/PTPN11/ARPP19/C2CD5/PRKCI/STXBP3/MAPK14/TSC1/BRAF/APPL2/OCLN/OSBPL8/RNASEL/CREBL2/MEF2A/NFE2L2/STXBP4/SLC5A3/SORT1/ADIPOR2/IRS1/INSR/ENPP1/EDNRA/HK2/PIK3R1/YES1/SLC2A10/SORBS1/SLC1A2/GPC3	31
BP	GO:0030512	negative regulation of transforming growth factor beta receptor signaling pathway	24/3781	81/18723	0.0276399	0.150492	0.122193	SIRT1/LEMD3/PDPK1/PPM1A/ADAM17/SNX6/MTMR4/BCL9L/SPRED2/STRAP/SNX25/SKIL/PBLD/LDLRAD4/SMURF2/SPRED1/IL17RD/SLC2A10/FBN1/CD109/TGFB3/TGFBR3/ASPN/PEG10	24
BP	GO:0051817	modulation of process of other organism involved in symbiotic interaction	24/3781	81/18723	0.0276399	0.150492	0.122193	CCNT1/REST/SP1/YTHDC2/EP300/DAG1/NAPEPLD/EIF2AK4/CHD1/ANO6/CCNK/FMR1/NUCKS1/VAPB/ULK2/HSPA8/IGF2R/FBXL2/INSR/STOM/CX3CR1/APOE/CCL5/HPN	24
BP	GO:0000377	RNA splicing, via transesterification reactions with bulged adenosine as nucleophile	79/3781	320/18723	0.0277168	0.150492	0.122193	DHX9/DDX46/YTHDC1/REST/HNRNPK/THRAP3/SCAF11/SF3B1/SON/MTREX/SRSF10/METTL14/PRPF40A/GEMIN5/NUP98/PRPF4B/HNRNPR/CELF1/HNRNPU/AQR/SNRNP200/SRPK2/DHX8/DBR1/SNIP1/PRMT5/SETX/SF3A1/CDC40/CDK13/SLU7/RBM41/SRSF1/RBM23/RSRC1/NCBP1/DYRK1A/DDX20/RBM22/PRPF8/CRNKL1/SRRM2/MFAP1/DDX17/FAM172A/RBM25/METTL16/RBM39/PPWD1/RBFOX2/RBMXL1/FMR1/FXR1/CDC5L/SRRM1/TFIP11/WBP11/DDX23/HNRNPF/PRPF4/TGS1/NSRP1/PRPF39/SYNCRIP…	79
BP	GO:0000398	mRNA splicing, via spliceosome	79/3781	320/18723	0.0277168	0.150492	0.122193	DHX9/DDX46/YTHDC1/REST/HNRNPK/THRAP3/SCAF11/SF3B1/SON/MTREX/SRSF10/METTL14/PRPF40A/GEMIN5/NUP98/PRPF4B/HNRNPR/CELF1/HNRNPU/AQR/SNRNP200/SRPK2/DHX8/DBR1/SNIP1/PRMT5/SETX/SF3A1/CDC40/CDK13/SLU7/RBM41/SRSF1/RBM23/RSRC1/NCBP1/DYRK1A/DDX20/RBM22/PRPF8/CRNKL1/SRRM2/MFAP1/DDX17/FAM172A/RBM25/METTL16/RBM39/PPWD1/RBFOX2/RBMXL1/FMR1/FXR1/CDC5L/SRRM1/TFIP11/WBP11/DDX23/HNRNPF/PRPF4/TGS1/NSRP1/PRPF39/SYNCRIP…	79
BP	GO:0070482	response to oxygen levels	85/3781	347/18723	0.0277631	0.150492	0.122193	CREB1/REST/NF1/SIRT1/RAF1/APAF1/CREBBP/UBQLN1/EP300/OPA1/MTOR/HIF1AN/ATP6V1A/BECN1/ATP7A/ARNT/NPEPPS/SMAD4/ADAM17/TSC1/TM9SF4/SLC11A2/DNM1L/USP19/MECP2/CPEB4/HP1BP3/CBL/TMBIM6/BIRC2/EEF2K/CYB5R4/NFE2L2/ROCK2/FOXO3/ITGA2/CPEB2/ITPR1/DDAH1/PTEN/PDK3/THBS1/BNIP3L/MDM2/CAT/SMAD3/BACH1/BCL2/MDM4/ALAD/MYB/ARNT2/PRKCE/ITPR2/HIPK2/EDNRA/HYOU1/CDKN1B/ABAT/HK2/PRKAA1/PMAIP1/POSTN/BRIP1/PLOD2/PDGFRB/STC2/EG…	85
BP	GO:0030540	female genitalia development	7/3781	16/18723	0.0279626	0.150492	0.122193	ESR1/TBX3/CHD7/LRP2/WNT5A/TP63/FGF10	7
BP	GO:0051238	sequestering of metal ion	7/3781	16/18723	0.0279626	0.150492	0.122193	SLC30A7/SLC30A4/S100A8/LCN2/S100A9/S100A7/SLC30A8	7
BP	GO:0060572	morphogenesis of an epithelial bud	7/3781	16/18723	0.0279626	0.150492	0.122193	CTNNB1/AR/SULF1/WNT5A/FGFR2/TP63/FGF10	7
BP	GO:0071391	cellular response to estrogen stimulus	7/3781	16/18723	0.0279626	0.150492	0.122193	NCOA4/TRIM24/MDM2/BCAS3/ESR1/AR/RARA	7
BP	GO:0080009	mRNA methylation	7/3781	16/18723	0.0279626	0.150492	0.122193	METTL14/ZC3H13/CBLL1/TRMT61B/CMTR2/VIRMA/METTL16	7
BP	GO:1901201	regulation of extracellular matrix assembly	7/3781	16/18723	0.0279626	0.150492	0.122193	CLASP2/CLASP1/DAG1/SMAD3/PHLDB1/PHLDB2/ANTXR1	7
BP	GO:1902570	protein localization to nucleolus	7/3781	16/18723	0.0279626	0.150492	0.122193	POLR1A/NOL8/NMD3/WRN/UTP25/NVL/GLUL	7
BP	GO:2000765	regulation of cytoplasmic translation	7/3781	16/18723	0.0279626	0.150492	0.122193	DHX9/DHX36/FMR1/CPEB4/CPEB3/CPEB2/RBM24	7
BP	GO:2001034	positive regulation of double-strand break repair via nonhomologous end joining	7/3781	16/18723	0.0279626	0.150492	0.122193	RIF1/KMT5B/SHLD2/PRKDC/SMCHD1/DTX3L/PARP9	7
BP	GO:0002200	somatic diversification of immune receptors	23/3781	77/18723	0.0279648	0.150492	0.122193	TP53BP1/DCAF1/RIF1/PMS2/MSH3/PAXIP1/MCM3AP/KMT5B/SHLD2/NBN/PRKDC/ADAR/MLH1/MSH6/NDFIP1/SUPT6H/LIG4/RNF168/NSD2/MSH2/SWAP70/TFRC/TNFSF13	23
BP	GO:0048565	digestive tract development	35/3781	127/18723	0.0279797	0.150492	0.122193	CHD8/NIPBL/VPS52/CRKL/YIPF6/EPB41L5/SMAD2/CTNNB1/CBFA2T2/BBS7/GLI3/IL6ST/RB1/SAV1/DCHS1/AHI1/SMAD3/BCL2/YAP1/PKD1/SLC4A2/PDGFC/LGR4/WNT5A/RET/TGFB3/TGFB2/COBL/FGFR2/AGR2/OXTR/TP63/ASCL1/FGF10/SPDEF	35
BP	GO:0006006	glucose metabolic process	51/3781	196/18723	0.028035	0.150657	0.122327	SIRT1/HECTD4/EP300/USP7/MTOR/GSK3B/ARPP19/RANBP2/NCOA2/PPP4R3B/SOGA1/ZMPSTE24/MAPK14/PIK3CA/CRY1/KBTBD2/DDB1/OMA1/NLN/PGM2/EPM2AIP1/PER2/DLAT/WDTC1/OGT/HK1/ACADM/COX11/IRS1/PDK3/PFKM/INSR/PDK2/ENPP1/SLC39A14/CPT1A/HK2/LEPR/PRKAA1/PGM2L1/SORBS1/PMAIP1/KCNJ11/PPP1R3B/SORD/FBP1/PPP1R3C/ACACB/PDK4/TFF3/TFAP2B	51
BP	GO:0043620	regulation of DNA-templated transcription in response to stress	17/3781	53/18723	0.0281026	0.15089	0.122516	SIN3A/BCLAF1/ATF6/INO80/CHD6/IMPACT/MBTPS2/HIF1AN/ARNT/GCN1/TMBIM6/NEDD4/NFE2L2/BACH1/STOX1/CITED2/TCIM	17
BP	GO:0006073	cellular glucan metabolic process	22/3781	73/18723	0.0282291	0.151044	0.122641	MTOR/GSK3B/RB1CC1/PHKA2/EPM2AIP1/PTGES3/PER2/PHKA1/AGL/IL6ST/PPP1R2/PHKB/ACADM/IRS1/PFKM/GBE1/INSR/ENPP1/LEPR/SORBS1/PPP1R3B/PPP1R3C	22
BP	GO:0042058	regulation of epidermal growth factor receptor signaling pathway	22/3781	73/18723	0.0282291	0.151044	0.122641	SOCS4/HIP1/FER/ADAM17/SNX6/PTPN12/SOCS5/PSEN1/TSG101/CBL/SOS1/DUSP3/NEU3/PTPN3/CDH13/DGKD/BCAR3/AFAP1L2/GPRC5A/AGR2/AREG/NEURL1	22
BP	GO:0044042	glucan metabolic process	22/3781	73/18723	0.0282291	0.151044	0.122641	MTOR/GSK3B/RB1CC1/PHKA2/EPM2AIP1/PTGES3/PER2/PHKA1/AGL/IL6ST/PPP1R2/PHKB/ACADM/IRS1/PFKM/GBE1/INSR/ENPP1/LEPR/SORBS1/PPP1R3B/PPP1R3C	22
BP	GO:0070988	demethylation	22/3781	73/18723	0.0282291	0.151044	0.122641	KDM3B/KDM5A/USP7/KDM6A/OTUD4/KDM3A/USP9X/KDM5B/PHF2/TET2/PHF8/KDM1B/TDG/JMJD1C/KDM2A/FTO/TET3/CYP51A1/JARID2/KDM7A/KDM4B/GATA3	22
BP	GO:0006695	cholesterol biosynthetic process	18/3781	57/18723	0.0283873	0.151565	0.123064	MBTPS2/HMGCR/ERLIN1/ACLY/LPCAT3/MBTPS1/ERLIN2/HMGCS1/CYP51A1/SC5D/PRKAA1/PRKAA2/DHCR24/ABCG1/FGF1/APOE/SREBF1/SEC14L2	18
BP	GO:1902653	secondary alcohol biosynthetic process	18/3781	57/18723	0.0283873	0.151565	0.123064	MBTPS2/HMGCR/ERLIN1/ACLY/LPCAT3/MBTPS1/ERLIN2/HMGCS1/CYP51A1/SC5D/PRKAA1/PRKAA2/DHCR24/ABCG1/FGF1/APOE/SREBF1/SEC14L2	18
BP	GO:0006368	transcription elongation from RNA polymerase II promoter	21/3781	69/18723	0.0284201	0.151565	0.123064	SETD2/CTR9/ARID1A/HNRNPU/ZMYND11/SUPT16H/CDC73/EAF1/RTF1/CDK13/ARID1B/CTNNB1/TCERG1/ZMIZ1/SUPT6H/RNF168/WDR43/LEO1/CDK12/SERTAD2/ELP2	21
BP	GO:0030865	cortical cytoskeleton organization	19/3781	61/18723	0.0285188	0.151565	0.123064	ROCK1/AKAP11/PDCD6IP/DLG1/PAFAH1B1/NCKAP1/EPB41/ECT2/RHOBTB1/ROCK2/PLS1/LLGL1/IKBKB/EPB41L1/RACGAP1/RHOBTB3/FHOD3/EPB41L2/RHOB	19
BP	GO:0043966	histone H3 acetylation	19/3781	61/18723	0.0285188	0.151565	0.123064	SIN3A/SIRT1/EP300/BRPF3/MCM3AP/KAT6A/SMAD4/KMT2A/TADA1/DR1/MAP3K7/KAT7/KAT6B/JADE3/MEAF6/BRCA1/JADE2/BRCA2/GATA3	19
BP	GO:0003170	heart valve development	20/3781	65/18723	0.0285226	0.151565	0.123064	HECTD1/ROCK1/ZBTB14/MTOR/BMPR2/SMAD4/BMPR1A/NOTCH2/RB1/ROCK2/ACVR1/DCHS1/MDM2/MDM4/SOX4/GATA3/SLIT2/TGFB2/SLIT3/OLFM1	20
BP	GO:0032507	maintenance of protein location in cell	20/3781	65/18723	0.0285226	0.151565	0.123064	HNRNPU/ANKRD13C/TWF1/TOPORS/MORC3/VPS13A/VPS13D/VPS13C/GOLPH3/BBS4/SKP1/TAPT1/BARD1/HK1/SORL1/ANK3/HK2/CHCHD10/GJA1/TMSB10	20
BP	GO:0043489	RNA stabilization	20/3781	65/18723	0.0285226	0.151565	0.123064	DHX9/THRAP3/PHAX/HNRNPU/DHX36/MTOR/TENT2/MAPK14/ANGEL2/LARP1/METTL16/PAIP1/NAF1/SYNCRIP/TIRAP/TENT4B/NOCT/AXIN2/TRAF5/RBM24	20
BP	GO:0007411	axon guidance	58/3781	227/18723	0.0286983	0.152367	0.123716	KIF5B/DAG1/USP33/BMPR2/ARHGAP35/SMAD4/TRIO/CYFIP1/RYK/NOTCH2/OPHN1/SOS1/PTK2/TTC8/RPS6KA5/GLI3/NPTN/B3GNT2/SEMA4F/ENAH/MYCBP2/NEO1/SEMA3C/SEMA5A/ANOS1/KLF7/PALLD/FZD3/UNC5B/LAMA3/GATA3/KIF5C/SEMA3F/ALCAM/SLIT2/SEMA4B/LAMA2/LAMA5/UNC5C/PTPRM/LAMB2/PLXNC1/WNT3/SEMA6D/WNT5A/RET/CNTN4/LRP1/NRCAM/FLRT3/EPHA3/SLIT3/EMB/BMPR1B/SEMA3E/ERBB2/LAMC2/SEMA3B	58
BP	GO:0003283	atrial septum development	9/3781	23/18723	0.0289055	0.15268	0.12397	BMPR2/NOTCH2/NSD2/ACVR1/MDM2/MDM4/SOX4/WNT5A/TGFB2	9
BP	GO:0016578	histone deubiquitination	9/3781	23/18723	0.0289055	0.15268	0.12397	USP7/USP22/TRRAP/USP16/ASXL1/BRCC3/ATXN7/MYSM1/USP3	9
BP	GO:0042026	protein refolding	9/3781	23/18723	0.0289055	0.15268	0.12397	BAG5/PDCL/HSPA13/HSPA9/ST13/HSPA8/HSP90AA1/DNAJA4/HSPA2	9
BP	GO:0071514	genetic imprinting	9/3781	23/18723	0.0289055	0.15268	0.12397	CTCF/CTR9/ZNF445/ARID4A/PIK3CA/MECP2/KDM1B/BRCA1/PCGF5	9
BP	GO:0071636	positive regulation of transforming growth factor beta production	9/3781	23/18723	0.0289055	0.15268	0.12397	CREB1/ATF2/BMPR1A/CD46/ATP6AP2/THBS1/SMAD3/MYB/LUM	9
BP	GO:0090335	regulation of brown fat cell differentiation	9/3781	23/18723	0.0289055	0.15268	0.12397	SIRT1/HNRNPU/MTOR/NAPEPLD/MAPK14/RREB1/FTO/SOX13/SIX1	9
BP	GO:0006270	DNA replication initiation	12/3781	34/18723	0.029304	0.154208	0.125211	ORC4/ORC2/POLA1/NOC3L/TOPBP1/NBN/PURA/KAT7/ORC3/MCM2/CCNE2/MCM4	12
BP	GO:0007095	mitotic G2 DNA damage checkpoint signaling	12/3781	34/18723	0.029304	0.154208	0.125211	TAOK1/ABRAXAS1/RINT1/TOPBP1/NBN/BRCC3/TAOK3/MRE11/BRCA1/ATM/FOXN3/DTL	12
BP	GO:0016242	negative regulation of macroautophagy	12/3781	34/18723	0.029304	0.154208	0.125211	SMG1/SMCR8/MTOR/USP30/RUBCN/BECN1/TSC1/PIK3CA/MTM1/SEC22B/NPC1/UBQLN4	12
BP	GO:0035137	hindlimb morphogenesis	12/3781	34/18723	0.029304	0.154208	0.125211	CTNNB1/RPGRIP1L/FMN1/BMPR1A/MED1/AFF3/TBX3/WNT3/CHD7/GPC3/TP63/TFAP2B	12
BP	GO:0014706	striated muscle tissue development	93/3781	384/18723	0.0293196	0.154208	0.125211	SMAD5/CREB1/ARID2/MRTFB/HNRNPU/MAML1/PTCD2/EP300/MTOR/CCNT2/MTPN/PRKAR1A/HMGCR/MAPK1/SMAD4/ZMPSTE24/MAPK14/VGLL4/TSC1/CTNNB1/DDX17/FRS2/COPS2/NR1D2/ITGB1/USP19/FLNB/BMPR1A/NOTCH2/BCL9/NLN/AKAP13/MEF2A/DSG2/SMAD1/ARNTL/RB1/AKIRIN1/SAV1/NEBL/MAP2K4/ACVR1/SIX4/ACADM/SGCB/PTEN/MED1/SEMA3C/SMAD3/BCL2/JARID2/PDLIM5/YAP1/PKP2/RUNX1/ERBB4/HIVEP3/HOMER1/DSP/SVIL/TGFBR1/DDX39B/HEG1/PPP3CA/TBX3/PRKAA1/GJA1/…	93
BP	GO:0003158	endothelium development	37/3781	136/18723	0.0295034	0.155043	0.125889	ROCK1/VEZF1/BMPR2/FOXJ2/SMAD4/MARVELD2/CTNNB1/ACVR2B/ADD1/RAPGEF2/TJP1/ZDHHC21/RAP1B/ROCK2/ACVR1/VCL/AFDN/STARD13/IKBKB/RAP2C/ARHGEF26/CLIC4/ZEB1/MYADM/RDX/HEG1/ADAMTS12/GJA1/S1PR3/PTPRS/FASN/NR2F2/STC1/FGF1/RHOB/LCN2/GSTM3	37
BP	GO:0019058	viral life cycle	78/3781	317/18723	0.0306825	0.161054	0.130769	TASOR/TOP2B/DDX3X/PKN2/ITCH/YTHDC2/SRPK2/VPS4B/TRIM32/PDCD6IP/KPNA6/PDE12/PIKFYVE/DAG1/SETDB1/EEA1/EIF2AK4/NUP153/PI4KA/DDX6/CHMP3/ARL8B/LARP1/HACD3/CHMP2B/IDE/PPID/ZC3HAV1/CCNK/FMR1/ADAR/XPR1/EPS15/ITGB1/NUCKS1/SCARB2/MPHOSPH8/TSG101/CD46/DDB1/MID2/STAU1/NEDD4/KPNA3/WWP1/RNASEL/VPS37A/VAPB/HSPA8/ITGAV/ROCK2/VTA1/EIF2AK2/RESF1/ITGA2/MAVS/CNOT7/FBXL2/ATG16L1/BCL2/NPC1/CTBP2/SLC20A2/TFRC/FAM111A/TR…	78
BP	GO:0006858	extracellular transport	13/3781	38/18723	0.0308305	0.161054	0.130769	KATNIP/TSG101/KIF27/STK36/SPA17/RFX3/SPEF2/DNAH5/CFAP43/CABYR/NME5/SLC9A3R1/NEK10	13
BP	GO:0006882	cellular zinc ion homeostasis	13/3781	38/18723	0.0308305	0.161054	0.130769	SLC30A9/AP3B1/SLC30A5/SLC39A10/SLC30A7/SLC30A1/SLC39A6/SLC30A4/SLC39A14/S100A8/S100A9/SLC1A1/SLC30A8	13
BP	GO:0097242	amyloid-beta clearance	13/3781	38/18723	0.0308305	0.161054	0.130769	ROCK1/HMGCR/IDE/RAB11A/CLTC/CYP51A1/IGF1R/INSR/LRP2/LDLR/LRP1/APOE/MARCO	13
BP	GO:0045927	positive regulation of growth	65/3781	259/18723	0.0310117	0.161054	0.130769	CREB1/USP47/NIPBL/ADNP/DDX3X/CELF1/ADNP2/TRIM32/INO80/EIF4G2/MTOR/PAFAH1B1/BMPR2/MTPN/NCBP1/TAF9B/MAPK1/GOLGA4/MAPK14/MACF1/ADAM17/CDKN2AIP/PRKDC/ADAM10/CYFIP1/BMPR1A/ITSN2/SHTN1/N6AMT1/RAB11A/PLS1/RPTOR/CDKL5/SLC23A2/BCL2/NEDD4L/YAP1/INSR/STAT5B/SEMA5A/ERBB4/WFS1/GPAM/TGFBR1/DDX39B/MAPT/WNT3/CHD7/MAP1B/GHR/CYBA/FN1/LRP1/TGFB2/ACACB/S100A8/FGFR2/SYT1/AGR2/SLC44A4/SYT17/TGFBR3/HPN/ERBB2/S100A9	65
BP	GO:0014066	regulation of phosphatidylinositol 3-kinase signaling	31/3781	111/18723	0.0310801	0.161054	0.130769	SIRT1/UBE3A/BECN1/PIP5K1A/CBL/NEDD4/PTK2/PTPN13/FBXL2/ERBB3/PTEN/MAZ/CAT/IGF1R/INSR/ERBB4/ENTPD5/PDGFC/HCST/F2R/UNC5B/PDGFD/FGFR1/PDGFRB/FN1/TEK/TGFB2/SLC9A3R1/NTRK2/CCL5/FLT3	31
BP	GO:0090288	negative regulation of cellular response to growth factor stimulus	31/3781	111/18723	0.0310801	0.161054	0.130769	CTDSPL2/LEMD3/TRIM33/UBE2D3/EPN2/PIK3CB/ABL1/NEDD4/SKIL/CASK/TWSG1/THBS1/SORL1/CRIM1/SMURF2/ATP2B4/PTPN1/HIPK2/SPART/GATA3/TOB1/ADAMTS12/SLIT2/FBN1/SULF1/LRP2/WNT5A/ADGRA2/SHISA2/GREM1/CXCL13	31
BP	GO:0097485	neuron projection guidance	58/3781	228/18723	0.031117	0.161054	0.130769	KIF5B/DAG1/USP33/BMPR2/ARHGAP35/SMAD4/TRIO/CYFIP1/RYK/NOTCH2/OPHN1/SOS1/PTK2/TTC8/RPS6KA5/GLI3/NPTN/B3GNT2/SEMA4F/ENAH/MYCBP2/NEO1/SEMA3C/SEMA5A/ANOS1/KLF7/PALLD/FZD3/UNC5B/LAMA3/GATA3/KIF5C/SEMA3F/ALCAM/SLIT2/SEMA4B/LAMA2/LAMA5/UNC5C/PTPRM/LAMB2/PLXNC1/WNT3/SEMA6D/WNT5A/RET/CNTN4/LRP1/NRCAM/FLRT3/EPHA3/SLIT3/EMB/BMPR1B/SEMA3E/ERBB2/LAMC2/SEMA3B	58
BP	GO:0033865	nucleoside bisphosphate metabolic process	35/3781	128/18723	0.0312422	0.161054	0.130769	PANK3/SUCLA2/FAR1/HMGCR/ACLY/SUCLG2/HSD17B4/FITM2/DLAT/PDHX/DLD/ACACA/ACSL3/ELOVL5/HACD2/PDK3/HMGCS1/BPNT1/MCCC2/PDK2/PPT1/ENPP1/GPAM/GPAT4/AASS/SLC26A1/ELOVL2/ELOVL6/FASN/CROT/SLC26A2/NUDT8/ACOT4/ACACB/PDK4	35
BP	GO:0033875	ribonucleoside bisphosphate metabolic process	35/3781	128/18723	0.0312422	0.161054	0.130769	PANK3/SUCLA2/FAR1/HMGCR/ACLY/SUCLG2/HSD17B4/FITM2/DLAT/PDHX/DLD/ACACA/ACSL3/ELOVL5/HACD2/PDK3/HMGCS1/BPNT1/MCCC2/PDK2/PPT1/ENPP1/GPAM/GPAT4/AASS/SLC26A1/ELOVL2/ELOVL6/FASN/CROT/SLC26A2/NUDT8/ACOT4/ACACB/PDK4	35
BP	GO:0034032	purine nucleoside bisphosphate metabolic process	35/3781	128/18723	0.0312422	0.161054	0.130769	PANK3/SUCLA2/FAR1/HMGCR/ACLY/SUCLG2/HSD17B4/FITM2/DLAT/PDHX/DLD/ACACA/ACSL3/ELOVL5/HACD2/PDK3/HMGCS1/BPNT1/MCCC2/PDK2/PPT1/ENPP1/GPAM/GPAT4/AASS/SLC26A1/ELOVL2/ELOVL6/FASN/CROT/SLC26A2/NUDT8/ACOT4/ACACB/PDK4	35
BP	GO:0048864	stem cell development	25/3781	86/18723	0.0312787	0.161054	0.130769	SETD2/KLHL12/MAPK1/PHACTR4/FAM172A/BMPR1A/MSI2/NOLC1/ACVR1/TAPT1/SEMA4F/SEMA3C/KITLG/SEMA5A/ERBB4/EDNRA/SEMA3F/SEMA4B/LAMA5/SEMA6D/FN1/CITED2/RET/SEMA3E/SEMA3B	25
BP	GO:0003222	ventricular trabecula myocardium morphogenesis	6/3781	13/18723	0.0313509	0.161054	0.130769	BMPR1A/MED1/TGFBR1/HEG1/CHD7/TGFB2	6
BP	GO:0006983	ER overload response	6/3781	13/18723	0.0313509	0.161054	0.130769	GSK3B/BCL2L11/PPP1R15B/EIF2AK3/CCDC47/WFS1	6
BP	GO:0010960	magnesium ion homeostasis	6/3781	13/18723	0.0313509	0.161054	0.130769	TRPM7/CNNM3/CNNM4/ANK3/SLC41A1/TFAP2B	6
BP	GO:0016024	CDP-diacylglycerol biosynthetic process	6/3781	13/18723	0.0313509	0.161054	0.130769	CDS1/CDS2/LCLAT1/AGPAT5/GPAM/GPAT4	6
BP	GO:0016246	RNA interference	6/3781	13/18723	0.0313509	0.161054	0.130769	DHX9/CELF1/PRKRA/DICER1/ADAR/AGO2	6
BP	GO:0031053	primary miRNA processing	6/3781	13/18723	0.0313509	0.161054	0.130769	DDX3X/DROSHA/SMAD2/STAT3/SMAD1/SMAD3	6
BP	GO:0034497	protein localization to phagophore assembly site	6/3781	13/18723	0.0313509	0.161054	0.130769	TRAPPC8/PIK3C3/STX17/ATG9A/ATG16L1/WIPI1	6
BP	GO:0044090	positive regulation of vacuole organization	6/3781	13/18723	0.0313509	0.161054	0.130769	RAB3GAP2/BECN1/RAB3GAP1/PIP4K2C/PIP4K2B/ELAPOR1	6
BP	GO:0044794	positive regulation by host of viral process	6/3781	13/18723	0.0313509	0.161054	0.130769	YTHDC2/NUCKS1/HSPA8/IGF2R/STOM/APOE	6
BP	GO:0051451	myoblast migration	6/3781	13/18723	0.0313509	0.161054	0.130769	ROCK1/AKIRIN1/SIX4/NET1/THBS4/SIX1	6
BP	GO:0070914	UV-damage excision repair	6/3781	13/18723	0.0313509	0.161054	0.130769	SIRT1/INO80/CUL4B/XPC/DDB1/POLD3	6
BP	GO:0072710	response to hydroxyurea	6/3781	13/18723	0.0313509	0.161054	0.130769	ATRX/DDI2/FMR1/KAT7/SPIDR/TIMELESS	6
BP	GO:0098789	pre-mRNA cleavage required for polyadenylation	6/3781	13/18723	0.0313509	0.161054	0.130769	CPSF6/CPSF2/NCBP1/NUDT21/CSTF2T/CSTF2	6
BP	GO:1900044	regulation of protein K63-linked ubiquitination	6/3781	13/18723	0.0313509	0.161054	0.130769	DDX3X/TRIP12/UBR5/BIRC2/OTUB2/SASH1	6
BP	GO:1990403	embryonic brain development	6/3781	13/18723	0.0313509	0.161054	0.130769	TBC1D23/MED12/CTNNB1/CC2D2A/IFT140/EN1	6
BP	GO:0019318	hexose metabolic process	60/3781	237/18723	0.0314913	0.161641	0.131246	POFUT1/SIRT1/HECTD4/EP300/USP7/MTOR/GSK3B/ARPP19/RANBP2/NCOA2/PPP4R3B/SOGA1/ZMPSTE24/MAPK14/FPGT/PIK3CA/CRY1/KBTBD2/DDB1/OMA1/NLN/PGM2/EPM2AIP1/PER2/DLAT/WDTC1/PMM2/MAN2A1/MAN2A2/OGT/HK1/ACADM/COX11/IRS1/PDK3/PFKM/FUT8/MAN2B2/INSR/CHST15/PDK2/ENPP1/SLC39A14/CPT1A/HK2/PFKFB3/LEPR/PRKAA1/PGM2L1/SORBS1/PMAIP1/KCNJ11/PPP1R3B/SORD/FBP1/PPP1R3C/ACACB/PDK4/TFF3/TFAP2B	60
BP	GO:0003002	regionalization	81/3781	331/18723	0.0317186	0.162673	0.132083	TASOR/MIB1/POFUT1/HIPK1/BPTF/PALB2/ARL13B/EP300/INTU/BMPR2/CRKL/SMAD4/EPB41L5/WDR19/MED12/AIDA/SMAD2/CTNNB1/TTC21B/ACVR2B/PBX1/FRS2/PRKDC/RPGRIP1L/DYNC2H1/TBC1D32/BMPR1A/PSEN1/SUFU/NOTCH2/LRP6/ATP6AP2/GLI3/TCTN1/RNF2/TULP3/ACVR1/TSHZ1/SEMA3C/CELSR2/GORAB/AHI1/SMAD3/CHSY1/PCSK6/PGAP1/IFT140/MNS1/HIPK2/LMX1B/BHLHE40/BMI1/TGFBR1/AXIN2/MLLT3/TBX3/SEMA3F/AR/FOXA1/CXXC4/WNT3/TDRD5/LRP2/WNT5A/CITED2/PIF…	81
BP	GO:0032526	response to retinoic acid	30/3781	107/18723	0.0318682	0.163305	0.132597	CREB1/SUZ12/ADNP2/SETX/ACER2/ASXL1/SYNJ1/ABL2/NCOA1/IGF2R/ATM/MYB/YAP1/ABCA1/YES1/GJA1/GDAP1/WNT3/PDGFRB/WNT5A/RET/WNT9A/RARA/EPHA3/FGFR2/SREBF1/IGFBP2/SLC6A4/TNC/ASCL1	30
BP	GO:0010591	regulation of lamellipodium assembly	14/3781	42/18723	0.0319487	0.163581	0.132821	TWF1/MTOR/NCKAP1/ABI2/FER/ATP7A/PIK3CA/CYFIP1/OCLN/ACTR2/AKIRIN1/WASF2/PIK3R1/SLIT2	14
BP	GO:0007254	JNK cascade	44/3781	167/18723	0.0321061	0.164233	0.13335	FKTN/MAP4K3/ATF2/ITCH/ZMYND11/PJA2/ERCC6/TAOK1/PAFAH1B1/TRAF6/CRKL/NCOR1/HIPK3/MAPK8/RB1CC1/AIDA/HACD3/ZNF675/MAGI3/SH3RF1/MAP3K7/TAOK3/MAPK9/TIRAP/DUSP3/MAP3K20/MAP2K4/NFKB1/SMAD3/STK3/IGF1R/PHLPP1/HIPK2/ARHGEF6/EDA2R/CRACR2A/TNFRSF19/TRAF5/TLR3/MAPK8IP1/WNT5A/PDCD4/TNIK/CCL19	44
BP	GO:0008053	mitochondrial fusion	10/3781	27/18723	0.0322581	0.164233	0.13335	HUWE1/OPA1/MIGA1/USP30/MFN1/DNM1L/OMA1/AFG3L2/TFRC/GDAP1	10
BP	GO:0016556	mRNA modification	10/3781	27/18723	0.0322581	0.164233	0.13335	METTL14/TRUB1/ZC3H13/CBLL1/TRMT61B/CMTR2/VIRMA/METTL16/BAG4/PUS7	10
BP	GO:0031954	positive regulation of protein autophosphorylation	10/3781	27/18723	0.0322581	0.164233	0.13335	DDX3X/NBN/IQGAP1/TOM1L1/MRE11/RAP2C/PDGFC/PDGFD/NEK10/GREM1	10
BP	GO:0045830	positive regulation of isotype switching	10/3781	27/18723	0.0322581	0.164233	0.13335	TP53BP1/RIF1/PAXIP1/KMT5B/SHLD2/MLH1/NSD2/MSH2/TFRC/TNFSF13	10
BP	GO:1902914	regulation of protein polyubiquitination	10/3781	27/18723	0.0322581	0.164233	0.13335	DDX3X/XIAP/TRIP12/UBR5/MARCHF7/TRIM44/RNF40/BIRC2/OTUB2/SASH1	10
BP	GO:0017157	regulation of exocytosis	52/3781	202/18723	0.032262	0.164233	0.13335	REST/PREPL/CLASP2/SNX4/VPS4B/PDCD6IP/PDPK1/CLASP1/GSK3B/SEPTIN2/ATP2A2/AP1G1/FER/STXBP3/RAB33B/RAB3GAP1/ATP9A/FMR1/STAM/RAB21/DNM1L/RAB10/TSG101/RAP1B/RAB2B/C12orf4/NSF/SYTL4/RAB3D/PCLO/RAB27B/CASK/BACE1/FBXL20/STXBP5/CPLANE2/RAB8B/RAPGEF4/CADPS2/SLC4A8/STXBP1/SDC4/RIMS4/SYT7/ADCY1/GAB2/SYT9/HLA-F/SYT1/SYT13/SYT17/CACNA1H	52
BP	GO:0042060	wound healing	101/3781	422/18723	0.0323417	0.164503	0.13357	NF1/CLASP2/RAF1/AP3B1/MTOR/CLASP1/ARFGEF1/DAG1/BLOC1S6/C6orf89/ARHGAP35/LNPK/STXBP3/HMGCR/MAPK14/RREB1/MACF1/ADAM17/ARL8B/SMAD2/PIK3CA/LMAN1/PIK3CB/ANO6/HPS5/ITGB1/JMJD1C/OCLN/CRK/NOTCH2/METAP1/PAFAH2/PTK2/SYTL4/NFE2L2/GLI3/PDCD10/MYOF/IL6ST/GNAQ/ITGA2/CASK/VCL/VAV2/ERBB3/ADIPOR2/PTEN/MIA3/THBS1/SMAD3/SLC12A2/YAP1/VAV3/DST/PRKG1/PRKCE/ENPP4/F8/DDR1/DSP/DGKH/DGKE/TGFBR1/ABAT/DGKD/PHLDB2/XBP1/F2R/P…	101
BP	GO:0006383	transcription by RNA polymerase III	15/3781	46/18723	0.0327317	0.165818	0.134637	CHD8/ZNF143/GTF3C3/GTF3C4/RO60/BDP1/ICE1/DHX36/ICE2/MTOR/GTF3C1/SNAPC3/RPTOR/BRF2/AR	15
BP	GO:0050919	negative chemotaxis	15/3781	46/18723	0.0327317	0.165818	0.134637	RYK/ITGAV/SEMA4F/SEMA3C/SEMA5A/SEMA3F/SLIT2/SEMA4B/UNC5C/SEMA6D/WNT5A/FLRT3/SLIT3/SEMA3E/SEMA3B	15
BP	GO:0007040	lysosome organization	22/3781	74/18723	0.0327343	0.165818	0.134637	SPG11/RAB14/HOOK1/AP3B1/MTOR/PIKFYVE/TMEM106B/BECN1/ZKSCAN3/CHMP3/ARL8B/CHMP2B/WASHC5/SCARB2/MBTPS1/ATP6AP2/LYST/GNPTAB/HOOK3/PPT1/ABCA1/SYT7	22
BP	GO:0048332	mesoderm morphogenesis	22/3781	74/18723	0.0327343	0.165818	0.134637	SETD2/EXOC4/BMPR2/PRKAR1A/EPB41L5/SMAD2/ITGB1/BMPR1A/SMAD1/ITGA2/ACVR1/TWSG1/SMAD3/TXNRD1/TBX3/GJA1/INHBA/WNT3/ITGA3/WNT5A/FGFR2/WLS	22
BP	GO:0080171	lytic vacuole organization	22/3781	74/18723	0.0327343	0.165818	0.134637	SPG11/RAB14/HOOK1/AP3B1/MTOR/PIKFYVE/TMEM106B/BECN1/ZKSCAN3/CHMP3/ARL8B/CHMP2B/WASHC5/SCARB2/MBTPS1/ATP6AP2/LYST/GNPTAB/HOOK3/PPT1/ABCA1/SYT7	22
BP	GO:0051235	maintenance of location	80/3781	327/18723	0.0327961	0.165932	0.134729	IBTK/SIRT1/HNRNPU/ASXL2/LATS1/ANKRD13C/TWF1/G3BP2/PDPK1/PAFAH1B1/TOPORS/MORC3/TBCCD1/AKAP9/NRIP1/OSBPL11/VPS13A/VPS13D/ASXL1/HTT/CRY1/ABL1/VPS13C/POLR2M/PSEN1/SUFU/GOLPH3/CDS1/SLC30A7/OSBPL8/YWHAB/CDS2/ZFYVE1/FITM2/GOPC/ITGAV/BBS4/CHERP/FTO/SKP1/ITPR1/TAPT1/BARD1/NFKB1/HK1/ITPR3/PKD2/SORL1/SLC30A4/ATP7B/ANK3/ARHGAP21/CRY2/PRKCE/ITPR2/STAT5B/PKD1/ENPP1/ABCA1/CPT1A/HK2/F2R/CHCHD10/GJA1/TMSB10/FBN1/…	80
BP	GO:0050807	regulation of synapse organization	54/3781	211/18723	0.0328104	0.165932	0.134729	ADNP/CAPRIN1/UBE3A/DHX36/OPA1/PAFAH1B1/SETD5/DAG1/ABI2/DLG5/MAPK14/DCTN1/CHMP2B/ABL1/ADAM10/CYFIP1/DNM1L/ACTR2/NEDD4/ITSN1/EEF2K/HSPA8/FARP1/VPS35/ABHD17B/SIX4/CDKL5/PTEN/PPP1R9A/TANC2/ZMYND8/CLSTN2/SEPTIN11/TPBG/PDLIM5/AMIGO1/HOMER1/THBS2/SEMA3F/PTPRS/TIAM1/AMIGO2/LRRN1/WNT5A/FLRT3/SRCIN1/GPC4/APOE/SLITRK6/NTRK2/OXTR/NEURL1/SIX1/CBLN2	54
BP	GO:0051897	positive regulation of protein kinase B signaling	33/3781	120/18723	0.0330466	0.166637	0.135302	RICTOR/MTOR/ARFGEF1/HIP1/PIK3CA/PIK3CB/ITGB1/OSBPL8/PTK2/MTDH/BAG4/MAZ/THBS1/STK3/IGF1R/HSP90AA1/TPBG/INSR/SEMA5A/TGFBR1/GATA3/FERMT2/FAM110C/MYORG/LRP2/FGFR1/STOX1/TEK/RET/CX3CR1/IGFBP5/F7/CCL19	33
BP	GO:0071774	response to fibroblast growth factor	33/3781	120/18723	0.0330466	0.166637	0.135302	PTPN11/RAB14/DSTYK/SETX/CRKL/KDM5B/CTNNB1/FRS2/CDC5L/SHOC2/KIF16B/NDST1/NPTN/CHURC1/THBS1/GCLC/GCLM/GATA3/SULF1/POSTN/ZFP36L2/FGFR1/WNT5A/FGF1/FLRT3/FGFR2/SHISA2/TNC/CCL5/EGR3/FGFR3/FGF10/CXCL13	33
BP	GO:0071322	cellular response to carbohydrate stimulus	43/3781	163/18723	0.033153	0.166637	0.135302	SIN3A/RAF1/WDR35/OPA1/KIF5B/RAB11FIP2/OSBP/ZNF236/HMGCR/CCDC186/PPP3CB/PIK3CA/SELENOT/STXBP4/FOXO3/MAP2K4/PDK3/GCLC/IGF1R/UNC13B/GCLM/PRKCE/SLC39A14/KLF7/ANO1/ERN1/SOX4/XBP1/PPP3CA/PRKAA1/CALCRL/PRKAA2/KCNJ11/TIAM1/GPR27/SYBU/ABCG1/CYBA/LRP1/COLEC12/CAMK2N1/BAIAP3/ADCY5	43
BP	GO:0051646	mitochondrion localization	16/3781	50/18723	0.0332397	0.166637	0.135302	OPA1/RHOT1/LRPPRC/MFN1/SPAST/MTM1/DNM1L/TRAK1/MEF2A/ZBED3/TRAK2/ARMCX3/ARMC1/MAPT/SYBU/MAP1B	16
BP	GO:0048705	skeletal system morphogenesis	56/3781	220/18723	0.0332854	0.166637	0.135302	NIPBL/SETD2/WDR48/PRKRA/TRIP11/DLG1/BMPR2/ZMPSTE24/RAB33B/MAPK14/WDR19/MED12/GRHL2/SMAD2/CTNNB1/BPNT2/RYK/FMN1/PSEN1/DYNC2I1/GLI3/SGPL1/NDST1/RAB23/TULP3/SIX4/FLVCR1/SMAD3/CHSY1/TIPARP/SPEF2/IFT140/FOXN3/NAB1/PKD1/BMI1/TGFBR1/AXIN2/MMP16/TFAP2A/ARID5B/FGFR1/GHR/CITED2/TEK/TGFB3/STC1/RARA/FGFR2/BMPR1B/GREM1/MSX2/FGFR3/COL11A1/SIX1/CHAD	56
BP	GO:0002562	somatic diversification of immune receptors via germline recombination within a single locus	20/3781	66/18723	0.0333829	0.166637	0.135302	TP53BP1/DCAF1/RIF1/MSH3/PAXIP1/KMT5B/SHLD2/NBN/PRKDC/MLH1/MSH6/NDFIP1/SUPT6H/LIG4/RNF168/NSD2/MSH2/SWAP70/TFRC/TNFSF13	20
BP	GO:0016444	somatic cell DNA recombination	20/3781	66/18723	0.0333829	0.166637	0.135302	TP53BP1/DCAF1/RIF1/MSH3/PAXIP1/KMT5B/SHLD2/NBN/PRKDC/MLH1/MSH6/NDFIP1/SUPT6H/LIG4/RNF168/NSD2/MSH2/SWAP70/TFRC/TNFSF13	20
BP	GO:0046626	regulation of insulin receptor signaling pathway	20/3781	66/18723	0.0333829	0.166637	0.135302	SIRT1/PTPN11/OPA1/NUCKS1/OSBPL8/PIP4K2C/PIP4K2B/OGT/IRS1/SORL1/RPS6KB1/PTPN1/ENPP1/PIK3R1/PRKAA1/SORBS1/VWA2/SOCS1/SESN3/MZB1	20
BP	GO:0008630	intrinsic apoptotic signaling pathway in response to DNA damage	28/3781	99/18723	0.0334406	0.166637	0.135302	HNRNPK/USP47/SIRT1/HIPK1/MARCHF7/TRIM32/ERCC6/EP300/TOPORS/TAF9B/BCL2L11/ABL1/PRKDC/MLH1/MSH6/MSH2/MOAP1/USP28/SKIL/BCL2L2/BRCA1/ATM/FNIP2/BCL2/HIPK2/BRCA2/PIK3R1/TP63	28
BP	GO:0030834	regulation of actin filament depolymerization	17/3781	54/18723	0.0335218	0.166637	0.135302	TWF1/CAPZA2/MTPN/PIK3CA/ADD1/EPS8/TMOD3/SPTAN1/LIMA1/SPTBN1/CARMIL1/SWAP70/CRACD/SEMA5A/SVIL/RDX/ADD3	17
BP	GO:0043647	inositol phosphate metabolic process	17/3781	54/18723	0.0335218	0.166637	0.135302	PPIP5K2/IP6K1/OCRL/IPPK/SYNJ1/BPNT2/MINPP1/SYNJ2/INPP5B/INPP4B/NUDT4/PTEN/IMPA1/BPNT1/IPMK/PPIP5K1/INPP5J	17
BP	GO:0048488	synaptic vesicle endocytosis	19/3781	62/18723	0.0335632	0.166637	0.135302	KIAA1109/ROCK1/FCHO2/BTBD9/PPP3CB/SYNJ1/DNM1L/CANX/ITSN2/OPHN1/ITSN1/VAMP4/SYNJ2/BTBD8/RAB27B/DNAJC6/AMPH/STON2/SYT1	19
BP	GO:0140238	presynaptic endocytosis	19/3781	62/18723	0.0335632	0.166637	0.135302	KIAA1109/ROCK1/FCHO2/BTBD9/PPP3CB/SYNJ1/DNM1L/CANX/ITSN2/OPHN1/ITSN1/VAMP4/SYNJ2/BTBD8/RAB27B/DNAJC6/AMPH/STON2/SYT1	19
BP	GO:0032481	positive regulation of type I interferon production	18/3781	58/18723	0.0336186	0.166637	0.135302	DHX9/SETD2/DDX3X/CHUK/PTPN11/DHX36/TOMM70/G3BP1/DHX33/TBK1/POLR3A/POLR3B/MAVS/HSP90AA1/TLR3/DDX58/OAS3/ISG15	18
BP	GO:0001832	blastocyst growth	8/3781	20/18723	0.0338219	0.166637	0.135302	CTR9/PALB2/RTF1/NBN/COPS2/NCAPG2/BRCA2/GINS4	8
BP	GO:0006346	DNA methylation-dependent heterochromatin assembly	8/3781	20/18723	0.0338219	0.166637	0.135302	TASOR/SIRT1/ZNF304/ATF7IP/SETDB1/MPHOSPH8/RESF1/DNMT1	8
BP	GO:0015919	peroxisomal membrane transport	8/3781	20/18723	0.0338219	0.166637	0.135302	PEX1/ABCD3/PEX12/PEX19/PEX2/LONP2/PEX5/RAB8B	8
BP	GO:0043555	regulation of translation in response to stress	8/3781	20/18723	0.0338219	0.166637	0.135302	DDX3X/IMPACT/EIF2AK4/PPP1R15B/EIF2S1/EIF2AK3/EIF2AK2/DNAJC3	8
BP	GO:0061003	positive regulation of dendritic spine morphogenesis	8/3781	20/18723	0.0338219	0.166637	0.135302	CAPRIN1/DHX36/OPA1/PAFAH1B1/DNM1L/ACTR2/EEF2K/TIAM1	8
BP	GO:1904292	regulation of ERAD pathway	8/3781	20/18723	0.0338219	0.166637	0.135302	UBQLN1/UBQLN2/USP19/NFE2L2/USP14/USP13/SVIP/USP25	8
BP	GO:2000479	regulation of cAMP-dependent protein kinase activity	8/3781	20/18723	0.0338219	0.166637	0.135302	SIRT1/PRKAR2A/PRKAR1A/HTT/RAPGEF2/ATP2B4/PRKAR2B/PKIB	8
BP	GO:0050890	cognition	73/3781	296/18723	0.0339002	0.166637	0.135302	CREB1/NIPBL/ADNP/NF1/UBE3A/PJA2/EP300/MTOR/PAFAH1B1/SETD5/PIAS1/EIF2AK4/ATXN1L/HMGCR/MAPK1/BTBD9/PPP3CB/HTT/PAIP2/CHMP2B/SYNJ1/CYFIP1/SLC11A2/ITGB1/UBA6/MECP2/MAGT1/ATAD1/KRAS/PSEN1/ACTR2/EIF4EBP2/TTC8/NCSTN/BBS4/NPTN/CPEB3/TANC1/ATXN1/ITPR3/CIC/PTEN/SHANK2/DOP1B/SYNGAP1/DDHD2/TPBG/INSR/PPT1/AMFR/ADCY3/POMK/MAP1A/SLC1A4/GRPR/MAPT/CHD7/PRKAR2B/PLK2/ITGA3/LDLR/ADCY1/CX3CR1/APOE/GATM/ABCC8/BTG2/NTRK…	73
BP	GO:0015749	monosaccharide transmembrane transport	32/3781	116/18723	0.0339705	0.166637	0.135302	APPL1/PTPN11/ARPP19/C2CD5/PRKCI/STXBP3/MAPK14/TSC1/BRAF/APPL2/OCLN/OSBPL8/RNASEL/CREBL2/MEF2A/NFE2L2/STXBP4/SLC5A3/SORT1/ADIPOR2/IRS1/SLC23A2/INSR/ENPP1/EDNRA/HK2/PIK3R1/YES1/SLC2A10/SORBS1/SLC1A2/GPC3	32
BP	GO:0000290	deadenylation-dependent decapping of nuclear-transcribed mRNA	5/3781	10/18723	0.0340555	0.166637	0.135302	DCP1A/DCP2/CNOT7/PATL1/NOCT	5
BP	GO:0001672	regulation of chromatin assembly or disassembly	5/3781	10/18723	0.0340555	0.166637	0.135302	SPTY2D1/TLK1/PHF2/PHF8/TLK2	5
BP	GO:0003183	mitral valve morphogenesis	5/3781	10/18723	0.0340555	0.166637	0.135302	BMPR2/BMPR1A/ACVR1/DCHS1/SOX4	5
BP	GO:0006171	cAMP biosynthetic process	5/3781	10/18723	0.0340555	0.166637	0.135302	ADCY6/ADCY9/ADCY3/ADCY1/ADCY5	5
BP	GO:0009950	dorsal/ventral axis specification	5/3781	10/18723	0.0340555	0.166637	0.135302	SMAD2/CTNNB1/BMPR1A/CXXC4/WNT3	5
BP	GO:0010998	regulation of translational initiation by eIF2 alpha phosphorylation	5/3781	10/18723	0.0340555	0.166637	0.135302	EIF2AK4/PPP1R15B/EIF2AK3/EIF2AK2/DNAJC3	5
BP	GO:0042996	regulation of Golgi to plasma membrane protein transport	5/3781	10/18723	0.0340555	0.166637	0.135302	CNST/ATP2C1/LYPLA1/GOPC/ACSL3	5
BP	GO:0045792	negative regulation of cell size	5/3781	10/18723	0.0340555	0.166637	0.135302	MTOR/TSC1/PTEN/RDX/DEPTOR	5
BP	GO:0048340	paraxial mesoderm morphogenesis	5/3781	10/18723	0.0340555	0.166637	0.135302	EXOC4/SMAD2/BMPR1A/SMAD3/WNT5A	5
BP	GO:0060513	prostatic bud formation	5/3781	10/18723	0.0340555	0.166637	0.135302	AR/SULF1/WNT5A/TP63/FGF10	5
BP	GO:0060525	prostate glandular acinus development	5/3781	10/18723	0.0340555	0.166637	0.135302	FRS2/ESR1/FOXA1/FGFR2/TP63	5
BP	GO:0060736	prostate gland growth	5/3781	10/18723	0.0340555	0.166637	0.135302	UBE3A/PTEN/ESR1/AR/FGFR2	5
BP	GO:0090043	regulation of tubulin deacetylation	5/3781	10/18723	0.0340555	0.166637	0.135302	EP300/FRY/PRKAA1/MAPT/PRKAA2	5
BP	GO:0150172	regulation of phosphatidylcholine metabolic process	5/3781	10/18723	0.0340555	0.166637	0.135302	ACSL3/ABCA3/LDLR/APOC1/RAB38	5
BP	GO:1905456	regulation of lymphoid progenitor cell differentiation	5/3781	10/18723	0.0340555	0.166637	0.135302	FNIP1/SOS2/NUDT21/ZBTB1/SOS1	5
BP	GO:1990416	cellular response to brain-derived neurotrophic factor stimulus	5/3781	10/18723	0.0340555	0.166637	0.135302	UBE3A/PDPK1/EEF2K/MAPT/NTRK2	5
BP	GO:1990700	nucleolar chromatin organization	5/3781	10/18723	0.0340555	0.166637	0.135302	SMARCA5/SIRT1/BAZ2A/PHF2/PHF8	5
BP	GO:2000601	positive regulation of Arp2/3 complex-mediated actin nucleation	5/3781	10/18723	0.0340555	0.166637	0.135302	WASL/NCKAP1/ABI2/CYFIP1/WASF2	5
BP	GO:1903321	negative regulation of protein modification by small protein conjugation or removal	27/3781	95/18723	0.0342169	0.167295	0.135836	TAF1/HMG20A/TRIP12/UBR5/MARCHF7/TRIM44/SENP2/MTOR/SPOPL/UFL1/BAG5/PRMT3/CTNNB1/CRY1/ABL1/PSEN1/PIAS3/GNL3L/PER2/OTUB2/OGT/GCLC/DTX3L/PRKCE/ARRB1/SOX4/ISG15	27
BP	GO:1901654	response to ketone	50/3781	194/18723	0.0344908	0.1685	0.136815	SIN3A/USP8/SIRT1/UBE3A/OPA1/NCOA2/EIF4E/NCOA4/FECH/ATP2B1/LARP1/XRN1/CDC5L/GOLPH3/ADCY6/ABHD2/NCOA1/CBL/ROCK2/FOXO3/ACACA/PARP1/THBS1/YAP1/PRKCE/ADCY3/CCND1/NR3C1/BMI1/TRERF1/PRKAA1/SLIT2/KLF9/AR/PRKAA2/KCNJ11/POSTN/CYBA/ADCY1/TGFB3/TGFB2/SLIT3/SREBF1/TNC/TGFBR3/OXTR/ADCY5/MAOB/F7/CCL19	50
BP	GO:0036257	multivesicular body organization	11/3781	31/18723	0.0347792	0.169292	0.137457	VPS4B/STAM2/PDCD6IP/CHMP3/CHMP2B/STAM/TSG101/VPS36/VPS37A/RAB11A/VTA1	11
BP	GO:0044819	mitotic G1/S transition checkpoint signaling	11/3781	31/18723	0.0347792	0.169292	0.137457	GIGYF2/SDE2/WAC/PRKDC/ATM/MDM2/RFWD3/CCND1/CDKN1B/SOX4/PLK2	11
BP	GO:0070723	response to cholesterol	11/3781	31/18723	0.0347792	0.169292	0.137457	DAG1/HMGCR/SMAD2/LRP6/HMGCS1/GRAMD1C/ABCA1/ABCA2/TGFBR1/INHBA/F7	11
BP	GO:0071168	protein localization to chromatin	11/3781	31/18723	0.0347792	0.169292	0.137457	WAPL/NIPBL/TASOR/SETD2/MCM9/VCPIP1/RB1/MSH2/RAD21/ESR1/ESCO2	11
BP	GO:0034101	erythrocyte homeostasis	35/3781	129/18723	0.0347897	0.169292	0.137457	SMAD5/IREB2/SP3/RCOR1/ARID4A/KMT2E/ARNT/UFL1/MAPK14/PTBP3/PRKDC/RBFOX2/SLC11A2/TMOD3/ADAR/ACVR1B/SMAP1/STAT3/KAT7/HSPA9/ABCB10/RB1/FOXO3/FLVCR1/MED1/NCAPG2/KLF13/STAT5B/HIPK2/GATA3/ADGRF5/INHBA/CITED2/TGFBR3/ISG15	35
BP	GO:0048640	negative regulation of developmental growth	31/3781	112/18723	0.0349067	0.169727	0.137811	DIP2B/VGLL4/BBS2/RYK/RAI1/RNF6/SPAG9/ULK2/SAV1/STK4/SEMA4F/WWC2/PTEN/SEMA3C/STK3/JARID2/SEMA5A/SPART/CDKN1B/SEMA3F/GJA1/SEMA4B/PTPRS/WNT3/SEMA6D/WNT5A/CITED2/SLC6A4/FGFR3/SEMA3E/SEMA3B	31
BP	GO:0014033	neural crest cell differentiation	26/3781	91/18723	0.03498	0.16995	0.137992	KLHL12/MAPK1/SMAD4/PHACTR4/FBXL17/FAM172A/BMPR1A/LRP6/NOLC1/ACVR1/TAPT1/SEMA4F/SEMA3C/KITLG/SEMA5A/ERBB4/EDNRA/SEMA3F/SEMA4B/LAMA5/SEMA6D/FN1/CITED2/RET/SEMA3E/SEMA3B	26
BP	GO:0099173	postsynapse organization	44/3781	168/18723	0.0352354	0.171056	0.13889	CAPRIN1/UBE3A/WASL/DHX36/DLG1/OPA1/PAFAH1B1/ABI2/CRKL/SSH1/CHMP2B/ADAM10/DNM1L/OPHN1/ACTR2/EEF2K/HSPA8/TANC1/FARP1/WASF2/VPS35/ABHD17B/NOS1AP/CDKL5/PTEN/PPP1R9A/SYNGAP1/IGF1R/TANC2/ZMYND8/GPHN/PDLIM5/INSR/HOMER1/GLRB/SEMA3F/PTPRS/TIAM1/CTNND2/ITGA3/WNT5A/ZDHHC2/SRCIN1/APOE	44
BP	GO:1903364	positive regulation of cellular protein catabolic process	41/3781	155/18723	0.0353475	0.171466	0.139223	TAF1/CSNK1A1/HECTD1/ZYG11B/SOCS4/ANKIB1/UBQLN1/TMTC3/GSK3B/ARIH1/UBQLN2/RCHY1/PIAS1/FBXW8/VGLL4/FBXL5/RNF14/FMR1/SOCS5/PSEN1/RNF40/BBS7/MAPK9/PTK2/NFE2L2/RNF139/PSMC1/VPS35/USP13/PTEN/MDM2/GCLC/RNF19A/HSP90AA1/ABCA2/RDX/LRP2/PLK2/LDLR/LRP1/APOE	41
BP	GO:0006469	negative regulation of protein kinase activity	54/3781	212/18723	0.0356132	0.172619	0.14016	NF1/IPO7/APC/IBTK/SIRT1/SMCR8/SOCS4/LATS1/PRKAR2A/PDPK1/GGNBP2/PRKAR1A/PAK2/HIPK3/HMGCR/AIDA/SNX6/PIK3CB/ABL1/ZNF675/ADAR/GSKIP/SOCS5/PSEN1/TSG101/CBL/LRP6/IPO5/YWHAG/CEP85/INCA1/RB1/GNAQ/DUSP3/PTEN/SORL1/PAQR3/NCAPG2/PTPN1/SPRED1/CDKN1B/SH3BP5/HEG1/PTPRT/PRKAR2B/MAPK8IP1/PDCD4/NR2F2/DEPTOR/GPRC5A/SRCIN1/APOE/CAMK2N1/PKIB	54
BP	GO:1900182	positive regulation of protein localization to nucleus	25/3781	87/18723	0.0357238	0.17302	0.140484	UBR5/TPR/CD2AP/RBM22/MAPK1/MAPK14/NMD3/EFCAB7/PSEN1/KAT7/EIF2AK3/IPO5/GLI3/ECT2/MAVS/PARP1/CCT2/SMAD3/DTX3L/YAP1/TFRC/PIK3R1/FERMT2/PARP9/CDH1	25
BP	GO:0061448	connective tissue development	63/3781	252/18723	0.0357575	0.173047	0.140507	SMAD5/ATF2/SIRT1/PTPN11/TRIP11/PAXIP1/BMPR2/LNPK/ATP7A/ZMPSTE24/MAPK14/PIK3CA/CTNNB1/SNX19/BPNT2/TRPS1/BMPR1A/MEX3C/EIF2AK3/SMAD1/GLI3/FTO/TAPT1/SPTLC2/EVC/SORL1/SMAD3/PGRMC2/CHSY1/ZNF516/RUNX1/PKD1/SLC39A14/SPART/SLC25A25/KLF7/TGFBR1/ARRDC3/AXIN2/SH3PXD2B/XBP1/ARID5B/ADAMTS12/FOXA1/PDGFD/SULF1/MBOAT2/MATN3/PDGFRB/WNT5A/GHR/STC1/WNT9A/RARA/BMP8B/BMPR1B/GREM1/LOX/FGFR3/LUM/EFEMP1/COL11A1/MKX	63
BP	GO:0000375	RNA splicing, via transesterification reactions	79/3781	324/18723	0.0362028	0.175065	0.142145	DHX9/DDX46/YTHDC1/REST/HNRNPK/THRAP3/SCAF11/SF3B1/SON/MTREX/SRSF10/METTL14/PRPF40A/GEMIN5/NUP98/PRPF4B/HNRNPR/CELF1/HNRNPU/AQR/SNRNP200/SRPK2/DHX8/DBR1/SNIP1/PRMT5/SETX/SF3A1/CDC40/CDK13/SLU7/RBM41/SRSF1/RBM23/RSRC1/NCBP1/DYRK1A/DDX20/RBM22/PRPF8/CRNKL1/SRRM2/MFAP1/DDX17/FAM172A/RBM25/METTL16/RBM39/PPWD1/RBFOX2/RBMXL1/FMR1/FXR1/CDC5L/SRRM1/TFIP11/WBP11/DDX23/HNRNPF/PRPF4/TGS1/NSRP1/PRPF39/SYNCRIP…	79
BP	GO:0055076	transition metal ion homeostasis	37/3781	138/18723	0.0363287	0.175537	0.142528	SLC30A9/IREB2/XIAP/AP3B1/SLC30A5/ABCB7/SCO1/ATP6V1A/ATP7A/NCOA4/SMAD4/BTBD9/SLC39A10/FBXL5/SLC11A2/SLC30A7/NDFIP1/SLC30A1/FLVCR1/NEO1/SLC39A6/SLC30A4/ATP7B/SLC31A1/TFRC/SLC46A1/SLC39A14/SLC40A1/HFE/CYBRD1/STEAP2/S100A8/LCN2/TMPRSS6/S100A9/SLC1A1/SLC30A8	37
BP	GO:0001510	RNA methylation	24/3781	83/18723	0.0364407	0.17576	0.14271	METTL14/ZC3H13/CBLL1/METTL15/THUMPD3/TRMT61B/NSUN3/RNMT/CMTR2/ZCCHC4/TYW3/TRMT10A/TRMT1L/VIRMA/METTL16/ALKBH8/DIMT1/TGS1/LCMT2/TRMT13/WDR6/TFB2M/TARBP1/DALRD3	24
BP	GO:0031397	negative regulation of protein ubiquitination	24/3781	83/18723	0.0364407	0.17576	0.14271	TAF1/TRIP12/UBR5/MARCHF7/TRIM44/SENP2/MTOR/SPOPL/UFL1/BAG5/PRMT3/CRY1/ABL1/PSEN1/GNL3L/PER2/OTUB2/OGT/GCLC/DTX3L/PRKCE/ARRB1/SOX4/ISG15	24
BP	GO:0071333	cellular response to glucose stimulus	40/3781	151/18723	0.0364969	0.17576	0.14271	SIN3A/RAF1/WDR35/OPA1/KIF5B/RAB11FIP2/OSBP/ZNF236/HMGCR/CCDC186/PPP3CB/PIK3CA/SELENOT/STXBP4/FOXO3/PDK3/GCLC/IGF1R/UNC13B/GCLM/PRKCE/SLC39A14/KLF7/ANO1/ERN1/SOX4/XBP1/PPP3CA/PRKAA1/PRKAA2/KCNJ11/TIAM1/GPR27/SYBU/ABCG1/CYBA/LRP1/CAMK2N1/BAIAP3/ADCY5	40
BP	GO:0003351	epithelial cilium movement involved in extracellular fluid movement	12/3781	35/18723	0.0366309	0.17576	0.14271	KATNIP/KIF27/STK36/SPA17/RFX3/SPEF2/DNAH5/CFAP43/CABYR/NME5/SLC9A3R1/NEK10	12
BP	GO:0021955	central nervous system neuron axonogenesis	12/3781	35/18723	0.0366309	0.17576	0.14271	PAFAH1B1/ARHGAP35/NIN/TCTN1/FBXO45/MYCBP2/PTEN/HSP90AA1/SLIT2/DCLK1/CDH11/NR4A2	12
BP	GO:0032435	negative regulation of proteasomal ubiquitin-dependent protein catabolic process	12/3781	35/18723	0.0366309	0.17576	0.14271	USP7/SMARCC1/RYBP/WAC/BAG5/STYX/USP14/OGT/TLK2/SVIP/MAP1A/HFE	12
BP	GO:0034405	response to fluid shear stress	12/3781	35/18723	0.0366309	0.17576	0.14271	SOCS5/NFE2L2/PKD2/PKD1/ABCA1/ADAM9/GJA1/MTSS1/PDGFRB/CITED2/TGFB3/CA2	12
BP	GO:0035633	maintenance of blood-brain barrier	12/3781	35/18723	0.0366309	0.17576	0.14271	ITGB1/TJP1/OCLN/CLDN12/VCL/SLC12A2/JAM3/LAMC1/GJA1/LAMA2/ABCC8/SLC1A1	12
BP	GO:0039694	viral RNA genome replication	12/3781	35/18723	0.0366309	0.17576	0.14271	TASOR/TOP2B/SETDB1/EEA1/PI4KA/FMR1/MPHOSPH8/ROCK2/RESF1/FBXL2/ATG16L1/TOP2A	12
BP	GO:0032006	regulation of TOR signaling	29/3781	104/18723	0.0368071	0.176469	0.143285	SIRT1/LARS1/SMCR8/FNIP1/RICTOR/UBR1/UBR2/WAC/TBCK/ZMPSTE24/TSC1/PIK3CA/RFFL/GOLPH3/MIOS/LAMTOR3/TTI1/ARNTL/RRAGB/RPTOR/ATM/SIK3/SH3BP4/PRKAA1/RNF152/GPR137B/PRKAA2/DEPTOR/SESN3	29
BP	GO:0003206	cardiac chamber morphogenesis	33/3781	121/18723	0.036892	0.176601	0.143393	PTCD2/BMPR2/SMAD4/GRHL2/BMPR1A/NOTCH2/SOS1/NSD2/SAV1/PARVA/ACVR1/MED1/SEMA3C/MDM2/PKP2/DSP/TGFBR1/SOX4/HEG1/TBX3/GATA3/SLIT2/CHD7/LRP2/WNT5A/CITED2/TEK/TGFB2/SLIT3/FGFR2/CPE/TGFBR3/COL11A1	33
BP	GO:0042177	negative regulation of protein catabolic process	33/3781	121/18723	0.036892	0.176601	0.143393	TAF1/ROCK1/MARCHF7/USP7/SMARCC1/RYBP/WAC/HMGCR/BAG5/USP19/LRIG2/RGP1/PSEN1/SUFU/OPHN1/RIC1/AZIN1/STYX/USP14/OGT/MYCBP2/TLK2/PTPN3/CYP51A1/SVIP/USP25/SMAD3/MDM4/ALAD/HIPK2/MAP1A/HFE/TIMP3	33
BP	GO:0006029	proteoglycan metabolic process	23/3781	79/18723	0.0371219	0.177564	0.144175	BMPR2/FAM20B/CTNNB1/BPNT2/EXTL2/GLCE/CSGALNACT2/HS2ST1/NDST1/PXYLP1/CANT1/CHSY1/CHST15/UGDH/XYLT1/SLC2A10/DSEL/ADAMTS12/CHST10/SULF1/HS6ST3/BMPR1B/COL11A1	23
BP	GO:0036465	synaptic vesicle recycling	22/3781	75/18723	0.0377566	0.180461	0.146526	KIAA1109/ROCK1/AP3B1/FCHO2/BTBD9/PPP3CB/SYNJ1/CYFIP1/DNM1L/CANX/ITSN2/OPHN1/ITSN1/VAMP4/SYNJ2/BTBD8/RAB27B/DNAJC6/AMPH/SYT7/STON2/SYT1	22
BP	GO:0032728	positive regulation of interferon-beta production	13/3781	39/18723	0.0379461	0.181087	0.147035	DHX9/DDX3X/PTPN11/TOMM70/TBK1/POLR3A/POLR3B/MAVS/HSP90AA1/TLR3/DDX58/OAS3/ISG15	13
BP	GO:0090224	regulation of spindle organization	13/3781	39/18723	0.0379461	0.181087	0.147035	CEP97/HNRNPU/VPS4B/TPR/SENP6/DYNC1H1/DCTN1/RNF4/CHMP2B/MAP9/NUMA1/CLTC/PKD1	13
BP	GO:0010288	response to lead ion	9/3781	24/18723	0.0381795	0.181779	0.147597	BECN1/ATP7A/FECH/BACE1/CAT/ALAD/PPP2CB/MAPT/QDPR	9
BP	GO:0044321	response to leptin	9/3781	24/18723	0.0381795	0.181779	0.147597	SIRT1/BBS2/STAT3/BBS4/PTEN/UGCG/CCND1/LEPR/LRP2	9
BP	GO:0071577	zinc ion transmembrane transport	9/3781	24/18723	0.0381795	0.181779	0.147597	SLC30A5/SLC30A6/SLC39A10/SLC30A1/SLC39A6/SLC30A4/SLC39A14/SLC1A1/SLC30A8	9
BP	GO:0008344	adult locomotory behavior	21/3781	71/18723	0.0383319	0.182364	0.148072	GIGYF2/PUM1/CLCN3/PAFAH1B1/ZMPSTE24/BTBD9/TSC1/OXR1/EPS8/MECP2/ARCN1/ADAM22/INPP5F/NPC1/PPT1/HIPK2/GLRB/CHD7/SLITRK6/NR4A2/EN1	21
BP	GO:0097305	response to alcohol	63/3781	253/18723	0.0384858	0.182955	0.148552	USP46/DAG1/SETDB1/HMGCR/FECH/SMAD2/CTNNA1/CTNNB1/ATP2B1/LARP1/SETD7/XRN1/EPS8/GOLPH3/STAT3/ADCY6/ACTR2/CBL/LRP6/BIRC2/FOXO3/SPIDR/ACACA/PARP1/BRCA1/ADIPOR2/PTEN/SLC23A2/HMGCS1/MDM2/CAT/ALAD/TP53INP1/GRAMD1C/PRKCE/ITPR2/ABCA1/ADCY3/ABCA2/CCND1/CPT1A/TGFBR1/ABAT/PRKAA1/GATA3/SLIT2/KLF9/PRKAA2/INHBA/CDH1/CYBA/ADCY1/RARA/SLIT3/S100A8/FGFR2/SREBF1/TNC/TGFBR3/ADCY5/MAOB/F7/CCL19	63
BP	GO:0021543	pallium development	44/3781	169/18723	0.0385941	0.183189	0.148741	NF1/CELF1/XRN2/GSK3B/PAFAH1B1/KIF5B/CEP120/CRKL/TENT2/PHLPP2/TSC1/CTNNB1/ZMIZ1/NARS1/BBS2/UBA6/PSEN1/CRK/NCOA1/SLC38A2/DIXDC1/NDE1/GLI3/BBS4/GART/FBXO45/PTEN/EZH1/EFHC1/BTBD3/ATP2B4/GNG12/SLIT2/PTPRS/TACC1/LRP1/ASPM/RARA/BMERB1/BTG2/COL3A1/NTRK2/ASCL1/CNTNAP2	44
BP	GO:0006637	acyl-CoA metabolic process	27/3781	96/18723	0.0387247	0.183189	0.148741	SUCLA2/FAR1/ACLY/SUCLG2/HSD17B4/FITM2/DLAT/PDHX/DLD/ACACA/ACSL3/ELOVL5/HACD2/PDK3/HMGCS1/PDK2/PPT1/GPAM/GPAT4/AASS/ELOVL2/ELOVL6/FASN/NUDT8/ACOT4/ACACB/PDK4	27
BP	GO:0035383	thioester metabolic process	27/3781	96/18723	0.0387247	0.183189	0.148741	SUCLA2/FAR1/ACLY/SUCLG2/HSD17B4/FITM2/DLAT/PDHX/DLD/ACACA/ACSL3/ELOVL5/HACD2/PDK3/HMGCS1/PDK2/PPT1/GPAM/GPAT4/AASS/ELOVL2/ELOVL6/FASN/NUDT8/ACOT4/ACACB/PDK4	27
BP	GO:1901655	cellular response to ketone	27/3781	96/18723	0.0387247	0.183189	0.148741	USP8/SIRT1/EIF4E/NCOA4/FECH/ATP2B1/LARP1/XRN1/CDC5L/GOLPH3/ADCY6/ROCK2/FOXO3/ACACA/PRKCE/ADCY3/NR3C1/BMI1/TRERF1/PRKAA1/KLF9/AR/PRKAA2/POSTN/ADCY1/TNC/ADCY5	27
BP	GO:0001666	response to hypoxia	75/3781	307/18723	0.038786	0.183189	0.148741	CREB1/REST/NF1/SIRT1/RAF1/APAF1/CREBBP/UBQLN1/EP300/OPA1/MTOR/HIF1AN/BECN1/ATP7A/ARNT/NPEPPS/SMAD4/ADAM17/TM9SF4/SLC11A2/DNM1L/USP19/MECP2/HP1BP3/TMBIM6/BIRC2/NFE2L2/ROCK2/FOXO3/ITGA2/CPEB2/ITPR1/DDAH1/PTEN/PDK3/THBS1/BNIP3L/MDM2/CAT/SMAD3/BACH1/BCL2/MDM4/ALAD/MYB/ARNT2/PRKCE/ITPR2/HIPK2/EDNRA/HYOU1/CDKN1B/ABAT/HK2/PRKAA1/PMAIP1/POSTN/BRIP1/PLOD2/STC2/EGLN2/STOX1/CYBA/CITED2/KCND2/TEK/TGFB3/TGFB2…	75
BP	GO:0030517	negative regulation of axon extension	14/3781	43/18723	0.0388313	0.183189	0.148741	DIP2B/RYK/RNF6/SEMA4F/SEMA3C/SEMA5A/SEMA3F/SEMA4B/PTPRS/WNT3/SEMA6D/WNT5A/SEMA3E/SEMA3B	14
BP	GO:0031952	regulation of protein autophosphorylation	14/3781	43/18723	0.0388313	0.183189	0.148741	DDX3X/IMPACT/NBN/IQGAP1/TOM1L1/MRE11/MOB1B/EEF2K/RAP2C/ENPP1/PDGFC/PDGFD/NEK10/GREM1	14
BP	GO:0060443	mammary gland morphogenesis	14/3781	43/18723	0.0388313	0.183189	0.148741	KDM5B/BTRC/GLI3/MED1/DDR1/ESR1/TBX3/PGR/AR/WNT5A/FGFR2/IGFBP5/AREG/FGF10	14
BP	GO:0071604	transforming growth factor beta production	14/3781	43/18723	0.0388313	0.183189	0.148741	CREB1/ATF2/CD2AP/SMAD4/BMPR1A/CD46/ATP6AP2/ITGAV/THBS1/SMAD3/MYB/FN1/TGFB2/LUM	14
BP	GO:1904591	positive regulation of protein import	14/3781	43/18723	0.0388313	0.183189	0.148741	UBR5/TPR/RBM22/MAPK1/MAPK14/EFCAB7/PSEN1/IPO5/GLI3/ECT2/MAVS/SMAD3/PIK3R1/CDH1	14
BP	GO:2000756	regulation of peptidyl-lysine acetylation	19/3781	63/18723	0.0392382	0.184918	0.150146	SIN3A/CTCF/SIRT1/DIP2B/PAXIP1/SETD5/GLYR1/SMAD4/ZMPSTE24/KMT2A/KAT7/RPS6KA5/TADA2B/BRCA1/ARRB1/SOX4/PRKAA1/GATA3/PRKAA2	19
BP	GO:0043618	regulation of transcription from RNA polymerase II promoter in response to stress	15/3781	47/18723	0.0393709	0.184918	0.150146	SIN3A/ATF6/INO80/CHD6/IMPACT/MBTPS2/HIF1AN/ARNT/GCN1/TMBIM6/NEDD4/NFE2L2/BACH1/STOX1/CITED2	15
BP	GO:0035269	protein O-linked mannosylation	7/3781	17/18723	0.0394418	0.184918	0.150146	FKTN/TMTC3/RXYLT1/TMTC2/TMTC4/LARGE1/TMTC1	7
BP	GO:0035729	cellular response to hepatocyte growth factor stimulus	7/3781	17/18723	0.0394418	0.184918	0.150146	CREB1/APPL1/APPL2/MED1/GCLC/GCLM/ADAMTS12	7
BP	GO:0097067	cellular response to thyroid hormone stimulus	7/3781	17/18723	0.0394418	0.184918	0.150146	BRD8/MED1/GCLC/GCLM/THRB/RDX/KLF9	7
BP	GO:1901550	regulation of endothelial cell development	7/3781	17/18723	0.0394418	0.184918	0.150146	ROCK1/ADD1/ZDHHC21/ROCK2/VCL/IKBKB/S1PR3	7
BP	GO:1903140	regulation of establishment of endothelial barrier	7/3781	17/18723	0.0394418	0.184918	0.150146	ROCK1/ADD1/ZDHHC21/ROCK2/VCL/IKBKB/S1PR3	7
BP	GO:2000811	negative regulation of anoikis	7/3781	17/18723	0.0394418	0.184918	0.150146	ZNF304/PIK3CA/ITGB1/PTK2/BCL2/NTRK2/PDK4	7
BP	GO:0006406	mRNA export from nucleus	18/3781	59/18723	0.0395271	0.184918	0.150146	YTHDC1/SETD2/SMG1/NUP133/THOC2/TPR/MCM3AP/SMG6/NUP160/NCBP1/NUP155/FYTTD1/SMG7/GLE1/SUPT6H/UPF2/NUP107/DDX39B	18
BP	GO:0030042	actin filament depolymerization	18/3781	59/18723	0.0395271	0.184918	0.150146	TWF1/CAPZA2/MTPN/PIK3CA/ADD1/EPS8/TMOD3/SPTAN1/LIMA1/SPTBN1/CARMIL1/MICAL2/SWAP70/CRACD/SEMA5A/SVIL/RDX/ADD3	18
BP	GO:0071427	mRNA-containing ribonucleoprotein complex export from nucleus	18/3781	59/18723	0.0395271	0.184918	0.150146	YTHDC1/SETD2/SMG1/NUP133/THOC2/TPR/MCM3AP/SMG6/NUP160/NCBP1/NUP155/FYTTD1/SMG7/GLE1/SUPT6H/UPF2/NUP107/DDX39B	18
BP	GO:0071622	regulation of granulocyte chemotaxis	16/3781	51/18723	0.0396326	0.185272	0.150433	MAPK1/MOSPD2/DNM1L/PTK2/TIRAP/AKIRIN1/THBS1/JAM3/C5AR2/SLIT2/THBS4/CCL5/LBP/S100A7/CXCL17/CCL19	16
BP	GO:0003229	ventricular cardiac muscle tissue development	17/3781	55/18723	0.0396702	0.185307	0.150462	PTCD2/SMAD4/ZMPSTE24/BMPR1A/DSG2/MED1/PKP2/DSP/TGFBR1/HEG1/TBX3/CHD7/LRP2/TGFB2/FGFR2/TGFBR3/COL11A1	17
BP	GO:0007584	response to nutrient	45/3781	174/18723	0.0407931	0.190409	0.154604	APAF1/MTOR/SETDB1/TNKS/BECN1/HMGCR/ATP2B1/HAT1/BCKDHB/NCOA1/HLCS/TRIM24/AGL/NNT/ITGA2/ACSL3/OGT/ADIPOR2/PTEN/MED1/HMGCS1/MDM2/GCLC/CAT/ALAD/GCLM/PDK2/KANK2/TRIM25/ABCA1/CCND1/XBP1/POSTN/BRIP1/GDAP1/MAP1B/STC2/STC1/RARA/IGFBP2/SLC6A4/TNC/TNFRSF11B/ASCL1/F7	45
BP	GO:0006515	protein quality control for misfolded or incompletely synthesized proteins	10/3781	28/18723	0.041356	0.192455	0.156265	CUL3/ZYG11B/FBXL17/UGGT1/YME1L1/UBE2W/UGGT2/OMA1/KLHL15/LONP2	10
BP	GO:0010818	T cell chemotaxis	10/3781	28/18723	0.041356	0.192455	0.156265	WNK1/OXSR1/ADAM17/ADAM10/SLC12A2/STK39/WNT5A/CCL5/S100A7/CXCL13	10
BP	GO:0032607	interferon-alpha production	10/3781	28/18723	0.041356	0.192455	0.156265	DHX9/SETD2/DDX3X/CHUK/DHX36/TBK1/MAVS/PTPRS/TLR3/DDX58	10
BP	GO:0032647	regulation of interferon-alpha production	10/3781	28/18723	0.041356	0.192455	0.156265	DHX9/SETD2/DDX3X/CHUK/DHX36/TBK1/MAVS/PTPRS/TLR3/DDX58	10
BP	GO:0051271	negative regulation of cellular component movement	88/3781	367/18723	0.0414427	0.192713	0.156475	NF1/ARID2/CLASP2/RNF41/RNF20/WASL/AP1AR/SCAI/CLASP1/DAG1/DLG5/TCAF1/CTNNA1/SYNJ2BP/CERS2/MECP2/BMPR1A/GNA13/STAT3/CRK/ABHD2/OSBPL8/NFE2L2/PDCD10/MACIR/FOXO3/DUSP3/STK24/LRCH1/VCL/C5/PTPRG/SRGAP1/ADIPOR2/PTEN/MIA3/THBS1/AFDN/LDLRAD4/BCL2/STARD13/PATZ1/ZMYND8/CCDC125/MCC/TP53INP1/PRKG1/RAP2C/ATP2B4/CLIC4/SPRED1/DACH1/CDKN1B/SINHCAF/DNAJA4/PHLDB2/GATA3/C5AR2/SLIT2/GJA1/PTPRT/SULF1/PTPRM/PTPRK/CDH1/S…	88
BP	GO:0044272	sulfur compound biosynthetic process	39/3781	148/18723	0.0414931	0.192794	0.156541	SP1/MAT2A/MTR/METTL16/ACLY/GLCE/CSGALNACT2/MTRR/SLC10A7/NFE2L2/DLAT/PDHX/NDST1/DLD/MAT2B/ACACA/B3GNT2/ACSL3/ELOVL5/HACD2/PDK3/GCLC/CHSY1/GCLM/CHST15/PDK2/UGDH/PPT1/XYLT1/ST3GAL1/SLC26A1/DSEL/ELOVL2/ELOVL6/SLC1A2/SLC26A2/ACACB/PDK4/SLC1A1	39
BP	GO:0006112	energy reserve metabolic process	24/3781	84/18723	0.0415538	0.192794	0.156541	MTOR/GSK3B/RB1CC1/PHKA2/EPM2AIP1/PTGES3/PER2/PHKA1/AGL/IL6ST/PPP1R2/PHKB/ACADM/IRS1/PFKM/GBE1/GFPT1/INSR/ENPP1/LEPR/SORBS1/ADGRF5/PPP1R3B/PPP1R3C	24
BP	GO:0010921	regulation of phosphatase activity	24/3781	84/18723	0.0415538	0.192794	0.156541	BOD1L1/ROCK1/MTOR/GSK3B/PPP1R12A/SLC39A10/PPP1R15B/PPP6R3/TSC1/HTT/MTMR9/MGAT5/PPP1R2/ROCK2/ITGA2/BAG4/NUAK1/SMAD3/IKBKB/CRY2/PPP1R26/NPNT/PDGFRB/TGFB2	24
BP	GO:0120193	tight junction organization	23/3781	80/18723	0.0424575	0.19684	0.159825	APC/ROCK1/PDCD6IP/DLG1/STRN/MPDZ/PAK2/GRHL2/MARVELD2/PATJ/TJP1/OCLN/MTDH/ECT2/ROCK2/AFDN/MPP7/IKBKB/TGFBR1/GJA1/TGFB3/ABCC8/SVEP1	23
BP	GO:0002262	myeloid cell homeostasis	41/3781	157/18723	0.0426464	0.197567	0.160416	SMAD5/IREB2/SP3/RCOR1/ARID4A/KMT2E/ARNT/UFL1/MAPK14/ADAM17/BCL2L11/PIK3CB/PTBP3/PRKDC/RBFOX2/SLC11A2/TMOD3/ADAR/ACVR1B/SMAP1/STAT3/KAT7/HSPA9/ABCB10/NCSTN/RB1/FOXO3/FLVCR1/MED1/JAM3/KITLG/NCAPG2/KLF13/STAT5B/HIPK2/GATA3/ADGRF5/INHBA/CITED2/TGFBR3/ISG15	41
[truncated: 553 more rows]
