# Supplementary material for: Breast cancer clinical outcomes and tumor immune microenvironment: cross-dialogue of multiple epigenetic modification profiles
Source: Aging (Albany NY). 2024 May 22;16(10):8998–9022. doi: 10.18632/aging.205853 (PMC11164499; doi:10.18632/aging.205853)
Supplement: Supplementary Table 4 [file aging-16-205853-s004.xlsx]

## Sheet: Sheet1
Supplementary Table 4. The details of KEGG analysis.
ID	Description	GeneRatio	BgRatio	pvalue	p.adjust	qvalue	geneID	Count
hsa05168	Herpes simplex virus 1 infection	182/1711	495/8163	4.81606e-17	1.5893e-14	1.27245e-14	ZNF845/ZNF627/CHUK/PTPN11/ZNF12/ZNF81/APAF1/ZNF510/ZNF41/ZNF611/ZNF45/POU2F1/ZNF765/ZNF561/ZFP30/ZNF641/ZNF180/ZNF792/MTOR/RBAK/ZNF543/ZNF304/TRAF6/ZFP90/ZNF780A/ZNF468/ZNF619/HCFC2/ZNF621/SRSF1/ZNF160/EIF2AK4/ZNF430/ZNF347/ZNF624/ZFP14/ZNF136/ZNF181/ZNF234/ZNF420/ZNF808/ZNF317/ZNF585A/ZFP1/ZNF227/TSC1/HCFC1/ZNF320/PIK3CA/ZNF417/ZNF484/PIK3CB/ZNF749/ZNF112/ZNF721/ZNF761/ZNF813/ZNF562/TBK1/ZNF791/…	182
hsa03013	Nucleocytoplasmic transport	47/1711	108/8163	9.06434e-08	1.49562e-05	1.19745e-05	TNPO1/IPO11/IPO8/NUP98/IPO7/PHAX/NUP58/NUP133/XPO1/THOC2/KPNB1/SENP2/KPNA1/TPR/KPNA6/RANBP2/POM121/XPO4/NUP160/NCBP1/NUP153/NUP155/IPO9/NMD3/TMEM33/AHCTF1/GLE1/SRRM1/NUP54/NUP188/TNPO3/NUP50/KPNA3/NUP205/NDC1/IPO5/NUP42/XPO7/UPF2/NUP107/CASC3/NUP210/CSE1L/XPOT/NXT2/DDX39B/EEF1A2	47
hsa04910	Insulin signaling pathway	55/1711	137/8163	2.07028e-07	2.11193e-05	1.69089e-05	RAF1/SOCS4/PRKAR2A/SOS2/PDPK1/MTOR/GSK3B/EIF4E/CRKL/PRKCI/PRKAR1A/EXOC7/MAPK1/MAPK8/TSC1/PIK3CA/PIK3CB/BRAF/KRAS/PHKA2/CRK/CBL/SOS1/MAPK9/PHKA1/PTPRF/ACACA/PRKAB2/NRAS/PHKB/HK1/RPTOR/IRS1/SHC1/GRB2/RPS6KB1/IKBKB/INSR/PTPN1/HK2/PIK3R1/PRKAA1/PIK3R3/SORBS1/PRKAA2/PPP1R3B/FASN/PRKAR2B/SOCS1/FBP1/PPP1R3C/ACACB/SREBF1/CALML5/PRKACB	55
hsa04068	FoxO signaling pathway	53/1711	131/8163	2.55991e-07	2.11193e-05	1.69089e-05	CHUK/SIRT1/RAF1/CREBBP/EP300/USP7/SOS2/PDPK1/RBL2/MAPK1/SMAD4/MAPK14/MAPK8/BCL2L11/PIK3CA/PIK3CB/BRAF/SETD7/KRAS/STAT3/CCNG2/SOS1/MAPK9/NLK/FOXO3/PRKAB2/STK4/NRAS/PTEN/IRS1/ATM/MDM2/CAT/SMAD3/IGF1R/GRB2/IKBKB/INSR/CCND1/HOMER1/CDKN1B/TGFBR1/PIK3R1/PRKAA1/PLK4/PIK3R3/HOMER2/PRKAA2/PLK2/TGFB3/TGFB2/S1PR4/SGK3	53
hsa05220	Chronic myeloid leukemia	35/1711	76/8163	7.79641e-07	4.51001e-05	3.61088e-05	CHUK/POLK/PTPN11/RAF1/SOS2/CRKL/MAPK1/SMAD4/PIK3CA/PIK3CB/BRAF/ABL1/KRAS/CRK/CBL/SOS1/RB1/NRAS/NFKB1/MDM2/SMAD3/SHC1/GRB2/IKBKB/CTBP2/RUNX1/STAT5B/CCND1/CDKN1B/TGFBR1/PIK3R1/PIK3R3/GAB2/TGFB3/TGFB2	35
hsa04120	Ubiquitin mediated proteolysis	55/1711	142/8163	8.20001e-07	4.51001e-05	3.61088e-05	CUL3/CDC23/UBE3B/XIAP/FBXW11/UBE3A/BIRC6/ITCH/TRIP12/UBR5/TRIM32/UBE4A/HUWE1/ANAPC1/UBE2K/CUL5/CUL4B/CDC27/TRAF6/UBE3C/UBE2G1/RCHY1/PIAS1/UBE2D3/FBXW8/HERC2/HERC1/UBE2H/UBE4B/KLHL9/UBA6/UBA3/UBE2W/UBE2E1/TRIM37/DDB1/CUL2/PIAS3/CBL/CUL4A/BTRC/NEDD4/WWP1/BIRC2/UBE2Q2/MAP3K1/RHOBTB1/UBA2/SKP1/BRCA1/MDM2/NEDD4L/SMURF2/FANCL/SOCS1	55
hsa04144	Endocytosis	85/1711	251/8163	9.87976e-07	4.6576e-05	3.72905e-05	USP8/SNX4/RNF41/ZFYVE16/RBSN/ITCH/WASL/VPS4B/STAM2/PDCD6IP/RUFY2/ARFGEF2/ACAP2/ARFGEF1/KIF5B/RAB11FIP2/TRAF6/CAPZA2/EEA1/PRKCI/WASHC4/RABEP1/CHMP3/AP2B1/EPN2/RAB5B/GBF1/SMAD2/GIT2/SNX6/ASAP2/CHMP2B/STAM/WASHC5/SNX2/EPS15/VPS26A/RAB10/TSG101/AGAP1/SMAP1/PIP5K1A/ACTR2/CBL/IQSEC1/RAB11FIP1/VPS36/NEDD4/WWP1/ARF3/VPS37A/ZFYVE9/WIPF2/HSPA8/RAB11A/IGF2R/VTA1/VPS35/SNX1/CLTC/ASAP1/MDM2/SMAD3/IGF1R/NEDD4L…	85
hsa04070	Phosphatidylinositol signaling system	41/1711	97/8163	1.51214e-06	5.70566e-05	4.56817e-05	PIK3C2A/PPIP5K2/PIK3C3/SACM1L/PIKFYVE/MTMR1/IP6K1/OCRL/IPPK/PI4KA/MTMR6/PIK3CA/PIK3CB/SYNJ1/MTM1/BPNT2/PIP5K1A/CDS1/MTMR4/PIP4K2C/SYNJ2/INPP5B/CDS2/PIP4K2B/ITPR1/ITPR3/INPP4B/PI4K2B/PTEN/IMPA1/IPMK/INPP5F/PPIP5K1/ITPR2/DGKH/DGKE/DGKD/PLCD4/PIK3R1/PIK3R3/CALML5	41
hsa04140	Autophagy - animal	54/1711	141/8163	1.55609e-06	5.70566e-05	4.56817e-05	PIK3R4/SMCR8/RAF1/PIK3C3/ATG2B/PDPK1/MTOR/TRAF6/RUBCN/EIF2AK4/AMBRA1/BECN1/STX17/MAPK1/RAB33B/MAPK8/ATG14/ATG9A/RB1CC1/TSC1/PIK3CA/PIK3CB/TBK1/CAMKK2/KRAS/MAP3K7/EIF2S1/EIF2AK3/MTMR4/MAPK9/SNAP29/ULK2/ZFYVE1/RRAGB/SUPT20H/ITPR1/NRAS/RPTOR/LAMP2/PTEN/IRS1/ATG16L1/BCL2/IGF1R/PPP2CB/RPS6KB1/WIPI1/ERN1/PIK3R1/PRKAA1/PIK3R3/PRKAA2/DEPTOR/PRKACB	54
hsa05210	Colorectal cancer	37/1711	86/8163	2.93061e-06	9.671e-05	7.74297e-05	APPL1/APC/POLK/RAF1/MSH3/SOS2/MTOR/GSK3B/MAPK1/SMAD4/MAPK8/BCL2L11/SMAD2/PIK3CA/CTNNB1/PIK3CB/BRAF/MLH1/KRAS/MSH6/SOS1/MAPK9/MSH2/NRAS/SMAD3/BCL2/GRB2/RPS6KB1/CCND1/TGFBR1/AXIN2/PIK3R1/PIK3R3/PMAIP1/TGFB3/TGFB2/AREG	37
hsa05215	Prostate cancer	40/1711	97/8163	4.25578e-06	0.000127673	0.00010222	CREB1/CHUK/RAF1/CREBBP/EP300/SOS2/PDPK1/MTOR/GSK3B/MAPK1/PIK3CA/CTNNB1/PIK3CB/BRAF/KRAS/SOS1/RB1/NRAS/NFKB1/PTEN/MDM2/BCL2/IGF1R/GRB2/HSP90AA1/IKBKB/CCNE2/CCND1/ZEB1/PDGFC/CDKN1B/PIK3R1/PIK3R3/AR/PDGFD/FGFR1/PDGFRB/FGFR2/PLAT/ERBB2	40
hsa04510	Focal adhesion	69/1711	201/8163	6.0714e-06	0.000166964	0.000133677	XIAP/RAF1/ROCK1/SOS2/PDPK1/GSK3B/PPP1R12A/ARHGAP5/ARHGAP35/CRKL/PAK2/MAPK1/MAPK8/PIK3CA/CTNNB1/PIK3CB/BRAF/ITGB1/FLNB/PIP5K1A/CRK/RAP1B/SOS1/BIRC2/MAPK9/PTK2/DOCK1/ITGAV/ROCK2/ITGA2/PARVA/VCL/VAV2/PTEN/THBS1/PPP1R12B/BCL2/SHC1/IGF1R/GRB2/TLN2/LAMC1/VAV3/CCND1/COL4A5/PDGFC/PIK3R1/THBS2/LAMA3/PIK3R3/LAMA2/LAMA5/PDGFD/LAMB2/ITGB5/PDGFRB/ITGA3/FN1/MYLK/COL6A3/ITGA6/COL4A6/THBS4/TNC/COL1A2/ITGA11/ERBB…	69
hsa04810	Regulation of actin cytoskeleton	73/1711	218/8163	9.00584e-06	0.00022861	0.000183034	APC/RAF1/WASL/ROCK1/ARHGEF12/SOS2/PIKFYVE/NCKAP1/PPP1R12A/ABI2/ARHGAP35/CRKL/PAK2/MAPK1/IQGAP1/SSH1/PIK3CA/PIK3CB/BRAF/MYH10/CYFIP1/ITGB1/KRAS/GNA13/PIP5K1A/CRK/ACTR2/SOS1/PIP4K2C/PTK2/DOCK1/ITGAV/ROCK2/ITGA2/WASF2/PIP4K2B/SSH2/NRAS/SPATA13/VCL/ENAH/VAV2/PPP1R12B/VAV3/GNG12/PDGFC/RDX/ARHGEF6/PIK3R1/F2R/PIK3R3/LPAR1/FGD1/PDGFD/TIAM1/ITGB5/SSH3/IQGAP2/CYFIP2/FGFR1/PDGFRB/ITGA3/FN1/MYLK/FGF1/FGFR2/I…	73
hsa05205	Proteoglycans in cancer	69/1711	205/8163	1.29901e-05	0.000306194	0.000245151	PTPN11/RAF1/ROCK1/ARHGEF12/SOS2/PDPK1/MTOR/PPP1R12A/DROSHA/MAPK1/MAPK14/IQGAP1/SMAD2/PIK3CA/GAB1/CTNNB1/PIK3CB/BRAF/EIF4B/FRS2/ITGB1/FLNB/KRAS/STAT3/CBL/SOS1/PTK2/ITGAV/ROCK2/ITGA2/ITPR1/NRAS/ITPR3/VAV2/ERBB3/THBS1/PPP1R12B/MDM2/IGF1R/GRB2/RPS6KB1/VAV3/ANK3/HSPG2/ITPR2/ERBB4/CCND1/ESR1/RDX/PIK3R1/FZD3/PIK3R3/SDC4/FZD6/TIAM1/ITGB5/WNT3/FGFR1/WNT5A/FN1/TIMP3/PDCD4/TGFB2/WNT9A/COL1A2/PRKACB/LUM/GPC3…	69
hsa01521	EGFR tyrosine kinase inhibitor resistance	33/1711	79/8163	2.10498e-05	0.000463095	0.000370771	NF1/RAF1/SOS2/MTOR/GSK3B/EIF4E/MAPK1/BCL2L11/PIK3CA/GAB1/PIK3CB/BRAF/KRAS/STAT3/SOS1/JAK1/FOXO3/NRAS/ERBB3/PTEN/BCL2/SHC1/IGF1R/GRB2/RPS6KB1/PDGFC/PIK3R1/PIK3R3/PDGFD/PDGFRB/FGFR2/FGFR3/ERBB2	33
hsa01522	Endocrine resistance	38/1711	98/8163	3.89537e-05	0.000803421	0.000643249	SP1/RAF1/SOS2/MTOR/NCOR1/MAPK1/MAPK14/MAPK8/PIK3CA/PIK3CB/BRAF/KRAS/NOTCH2/ADCY6/SOS1/NCOA3/MAPK9/PTK2/RB1/NRAS/MED1/MDM2/ADCY9/BCL2/SHC1/IGF1R/GRB2/RPS6KB1/ADCY3/CCND1/ESR1/CDKN1B/PIK3R1/PIK3R3/ADCY1/PRKACB/ERBB2/ADCY5	38
hsa04213	Longevity regulating pathway - multiple species	27/1711	62/8163	4.86458e-05	0.000944301	0.000756043	SIRT1/MTOR/PIK3CA/PIK3CB/KRAS/ADCY6/EIF4EBP2/HSPA8/FOXO3/PRKAB2/NRAS/RPTOR/IRS1/CAT/ADCY9/IGF1R/RPS6KB1/INSR/ADCY3/PIK3R1/PRKAA1/PIK3R3/PRKAA2/ADCY1/PRKACB/ADCY5/HSPA2	27
hsa04340	Hedgehog signaling pathway	25/1711	56/8163	5.57386e-05	0.00102187	0.000818151	CUL3/CSNK1G3/CSNK1A1/CSNK1G1/FBXW11/KIF3A/MOSMO/GSK3B/SPOPL/EFCAB7/CDON/SUFU/BTRC/GLI3/HHAT/EVC/SPOP/BCL2/SMURF2/GRK3/CCND1/ARRB1/LRP2/SCUBE2/PRKACB	25
hsa04550	Signaling pathways regulating pluripotency of stem cells	50/1711	143/8163	6.61364e-05	0.00114868	0.00091968	SMARCAD1/SMAD5/REST/APC/RIF1/RAF1/GSK3B/SETDB1/BMPR2/KAT6A/MAPK1/SMAD4/MAPK14/SMAD2/PIK3CA/CTNNB1/PIK3CB/ACVR2B/ACVR1B/BMPR1A/KRAS/STAT3/JAK1/ZFHX3/SMAD1/IL6ST/SKIL/ACVR1/NRAS/SMAD3/PCGF5/IGF1R/JARID2/GRB2/LIFR/BMI1/AXIN2/PIK3R1/FZD3/TBX3/PIK3R3/FZD6/INHBA/WNT3/FGFR1/WNT5A/WNT9A/FGFR2/BMPR1B/FGFR3	50
hsa04141	Protein processing in endoplasmic reticulum	57/1711	171/8163	9.74909e-05	0.0016086	0.00128791	SEC24B/MARCHF6/ATF6/UBQLN1/SEC24C/MBTPS2/UBXN4/UBQLN2/UBE2G1/MAN1A2/EIF2AK4/UBE2D3/RAD23B/MAPK8/SEC24A/EDEM3/UGGT1/LMAN1/SEL1L/UBE4B/EDEM1/CANX/SEC23B/UGGT2/STT3B/EIF2S1/ERLEC1/MBTPS1/SEC31A/EIF2AK3/GANAB/MAPK9/DNAJC10/SEC24D/HSPA8/NFE2L2/SEC62/SEC23A/EIF2AK2/SKP1/SVIP/DNAJC3/BCL2/TRAM1/UBQLN4/HSP90AA1/TRAM1L1/HSPH1/AMFR/HYOU1/WFS1/ERN1/XBP1/MAN1A1/HSPA4L/ERO1B/HSPA2	57
hsa04520	Adherens junction	29/1711	71/8163	0.000106655	0.00161508	0.0012931	WASL/CREBBP/FARP2/EP300/FER/MAPK1/SMAD4/IQGAP1/CTNNA1/CTNNB1/TJP1/MAP3K7/NLK/PTPRF/SSX2IP/WASF2/VCL/AFDN/SMAD3/IGF1R/INSR/PTPN1/TGFBR1/YES1/SORBS1/PTPRM/FGFR1/CDH1/ERBB2	29
hsa04935	Growth hormone synthesis, secretion and action	43/1711	120/8163	0.000111082	0.00161508	0.0012931	CREB1/ATF2/RAF1/CREBBP/EP300/SOS2/MTOR/GSK3B/CRKL/MAPK1/MAPK14/MAPK8/PIK3CA/PIK3CB/KRAS/STAT3/CRK/ADCY6/SOS1/MAPK9/MAP3K1/PTK2/GNAQ/MAP2K4/ITPR1/NRAS/ITPR3/IRS1/ADCY9/SHC1/GRB2/CACNA1D/ITPR2/STAT5B/ADCY3/PIK3R1/PIK3R3/SOCS1/GHR/ADCY1/PRKACB/ADCY5/SSTR2	43
hsa05213	Endometrial cancer	25/1711	58/8163	0.000112566	0.00161508	0.0012931	APC/POLK/RAF1/SOS2/PDPK1/GSK3B/MAPK1/CTNNA1/PIK3CA/CTNNB1/PIK3CB/BRAF/MLH1/KRAS/SOS1/FOXO3/NRAS/PTEN/GRB2/CCND1/AXIN2/PIK3R1/PIK3R3/CDH1/ERBB2	25
hsa04012	ErbB signaling pathway	33/1711	85/8163	0.000119991	0.00164988	0.00132095	RAF1/SOS2/MTOR/GSK3B/CRKL/PAK2/MAPK1/MAPK8/PIK3CA/GAB1/PIK3CB/BRAF/ABL1/KRAS/ABL2/CRK/CBL/SOS1/MAPK9/PTK2/MAP2K4/NRAS/ERBB3/SHC1/GRB2/RPS6KB1/STAT5B/ERBB4/CDKN1B/PIK3R1/PIK3R3/AREG/ERBB2	33
hsa04152	AMPK signaling pathway	43/1711	121/8163	0.00013799	0.0017535	0.00140392	CREB1/SIRT1/RAB14/PDPK1/MTOR/PPP2R5E/HMGCR/TSC1/PIK3CA/PIK3CB/CAMKK2/PPP2R5D/RAB10/CAB39/MAP3K7/PPP2R2A/EEF2K/FOXO3/ACACA/PRKAB2/RPTOR/ADIPOR2/IRS1/PFKM/IGF1R/PPP2CB/RPS6KB1/INSR/PPP2R5A/CCND1/CAB39L/CPT1A/PIK3R1/PFKFB3/LEPR/PRKAA1/PIK3R3/PRKAA2/FASN/FBP1/ACACB/SREBF1/SCD	43
hsa04211	Longevity regulating pathway	34/1711	89/8163	0.000138155	0.0017535	0.00140392	CREB1/APPL1/ATF2/SIRT1/MTOR/EIF4E/RB1CC1/TSC1/PIK3CA/PIK3CB/CAMKK2/KRAS/ADCY6/FOXO3/PRKAB2/NRAS/NFKB1/RPTOR/ADIPOR2/IRS1/CAT/ADCY9/IGF1R/RPS6KB1/INSR/ADCY3/PIK3R1/PRKAA1/PIK3R3/PRKAA2/ADCY1/SESN3/PRKACB/ADCY5	34
hsa05212	Pancreatic cancer	30/1711	76/8163	0.00017032	0.00208169	0.00166668	CHUK/POLK/RAF1/MTOR/MAPK1/SMAD4/MAPK8/SMAD2/PIK3CA/PIK3CB/BRAF/KRAS/STAT3/JAK1/RALBP1/MAPK9/RB1/NFKB1/SMAD3/RPS6KB1/IKBKB/BRCA2/CCND1/TGFBR1/ARHGEF6/PIK3R1/PIK3R3/TGFB3/TGFB2/ERBB2	30
hsa00562	Inositol phosphate metabolism	29/1711	73/8163	0.000190822	0.00220755	0.00176745	PIK3C2A/PIK3C3/SACM1L/PIKFYVE/MTMR1/OCRL/IPPK/PI4KA/MTMR6/PIK3CA/PIK3CB/SYNJ1/MTM1/PIP5K1A/MINPP1/MTMR4/PIP4K2C/SYNJ2/INPP5B/ALDH6A1/PIP4K2B/INPP4B/PI4K2B/PTEN/IMPA1/IPMK/INPP5F/PLCD4/INPP5J	29
hsa04218	Cellular senescence	52/1711	156/8163	0.000193997	0.00220755	0.00176745	FBXW11/SIRT1/HIPK1/RAF1/TRPM7/MTOR/RBL2/RBBP4/ATR/LIN54/HIPK3/MAPK1/MAPK14/NBN/PPP3CB/TSC1/SMAD2/PIK3CA/PIK3CB/PPID/RAD1/LIN52/KRAS/MRE11/NFATC3/BTRC/RB1/FOXO3/ITPR1/NRAS/NFKB1/ITPR3/PTEN/ATM/MDM2/SMAD3/CACNA1D/ITPR2/CCNE2/HIPK2/LIN9/CCND1/RBL1/TGFBR1/PIK3R1/PPP3CA/PIK3R3/ZFP36L2/TGFB3/TGFB2/HLA-F/CALML5	52
hsa04917	Prolactin signaling pathway	28/1711	70/8163	0.000213393	0.00234732	0.00187935	RAF1/SOCS4/SOS2/GSK3B/MAPK1/MAPK14/MAPK8/PRLR/PIK3CA/PIK3CB/SOCS6/KRAS/SOCS5/STAT3/SOS1/MAPK9/FOXO3/NRAS/NFKB1/SOCS7/SHC1/GRB2/STAT5B/CCND1/ESR1/PIK3R1/PIK3R3/SOCS1	28
hsa03460	Fanconi anemia pathway	23/1711	54/8163	0.000259764	0.00276523	0.00221394	WDR48/POLK/PMS2/ERCC4/PALB2/FANCM/FAN1/ATR/REV1/RMI1/SLX4/MLH1/POLI/RPA1/REV3L/FANCF/USP1/BRCA1/FANCL/FANCI/BRCA2/FANCD2/BRIP1	23
hsa05222	Small cell lung cancer	34/1711	92/8163	0.000289883	0.00298942	0.00239344	XIAP/CHUK/POLK/APAF1/TRAF6/PIK3CA/PIK3CB/ITGB1/BIRC2/PTK2/ITGAV/RB1/ITGA2/NFKB1/PTEN/BCL2/IKBKB/LAMC1/CCNE2/CCND1/COL4A5/CDKN1B/PIK3R1/LAMA3/PIK3R3/LAMA2/LAMA5/TRAF5/LAMB2/ITGA3/FN1/ITGA6/COL4A6/LAMC2	34
hsa04151	PI3K-Akt signaling pathway	101/1711	354/8163	0.000339739	0.00339739	0.00272008	CREB1/PKN2/ATF2/CHUK/RAF1/SOS2/PDPK1/MTOR/RBL2/GSK3B/PPP2R5E/EIF4E/MAPK1/PHLPP2/PRLR/BCL2L11/TSC1/PIK3CA/PIK3CB/EIF4B/PPP2R5D/ITGB1/KRAS/MAGI1/SOS1/PPP2R2A/JAK1/YWHAB/YWHAG/PTK2/ITGAV/FOXO3/ITGA2/NRAS/NFKB1/RPTOR/BRCA1/ERBB3/PTEN/IRS1/THBS1/MDM2/BCL2/IGF1R/GRB2/PPP2CB/RPS6KB1/KITLG/HSP90AA1/IKBKB/MYB/LAMC1/INSR/PHLPP1/CCNE2/PPP2R5A/GNG12/ERBB4/CCND1/COL4A5/PDGFC/CDKN1B/PIK3R1/THBS2/F2R/LAMA3/PRKA…	101
hsa04150	mTOR signaling pathway	51/1711	156/8163	0.000377993	0.00366875	0.00293734	CHUK/RAF1/FNIP1/RICTOR/SOS2/PDPK1/MTOR/GSK3B/EIF4E/ATP6V1A/MAPK1/TSC1/PIK3CA/PIK3CB/BRAF/EIF4B/CLIP1/CAB39/KRAS/MIOS/LAMTOR3/TTI1/LRP6/SOS1/ULK2/ATP6V1C1/RRAGB/NRAS/RPTOR/PTEN/IRS1/LPIN2/FNIP2/IGF1R/GRB2/RPS6KB1/IKBKB/INSR/RPS6KA6/CAB39L/PIK3R1/FZD3/PRKAA1/RNF152/PIK3R3/PRKAA2/FZD6/WNT3/WNT5A/DEPTOR/WNT9A	51
hsa05165	Human papillomavirus infection	95/1711	331/8163	0.000405212	0.00382057	0.00305889	CREB1/CSNK1A1/APC/CHUK/UBE3A/MAML1/RAF1/CREBBP/EP300/DLG1/SOS2/MTOR/RBL2/GSK3B/ATR/UBR4/PPP2R5E/ATP6V1A/PRKCI/MAPK1/TSC1/PIK3CA/CTNNB1/PIK3CB/PATJ/TBK1/NFX1/PPP2R5D/ITGB1/KRAS/PSEN1/MAGI1/NOTCH2/SOS1/PPP2R2A/JAK1/PTK2/ITGAV/ATP6V1C1/RB1/PSMC1/EIF2AK2/ITGA2/NRAS/NFKB1/ATP6V0A1/MAML3/PTEN/ATM/THBS1/MDM2/LLGL1/GRB2/PPP2CB/RPS6KB1/IKBKB/LAMC1/PARD6B/CCNE2/PPP2R5A/CCND1/COL4A5/CDKN1B/RBL1/AXIN2/PIK3R1…	95
hsa04710	Circadian rhythm	16/1711	34/8163	0.000591127	0.00541866	0.00433839	CREB1/CLOCK/FBXW11/CRY1/NR1D2/BTRC/FBXL3/PER2/ARNTL/SKP1/PRKAB2/PER3/CRY2/BHLHE40/PRKAA1/PRKAA2	16
hsa04722	Neurotrophin signaling pathway	40/1711	119/8163	0.000846747	0.00755207	0.00604647	PTPN11/KIDINS220/RAF1/SOS2/PDPK1/PRDM4/GSK3B/TRAF6/CRKL/MAPK1/MAPK14/MAPK8/PIK3CA/GAB1/PIK3CB/BRAF/ABL1/FRS2/KRAS/PSEN1/CRK/RAP1B/SOS1/MAPK9/MAP3K1/RPS6KA5/FOXO3/NRAS/SORT1/NFKB1/IRS1/BCL2/SHC1/GRB2/IKBKB/RPS6KA6/PIK3R1/PIK3R3/NTRK2/CALML5	40
hsa03018	RNA degradation	29/1711	79/8163	0.00089429	0.0077662	0.00621791	TTC37/DCP1A/MTREX/CNOT6/XRN2/DHX36/DCP2/CNOT6L/CNOT4/CNOT1/DIS3/DDX6/EXOSC10/PAN2/CNOT8/PAN3/XRN1/DIS3L/EDC4/HSPA9/TOB2/TENT4B/CNOT7/NUDT16/PATL1/PFKM/TOB1/ENO2/BTG2	29
hsa04350	TGF-beta signaling pathway	33/1711	94/8163	0.00101245	0.00855901	0.00685267	SMAD5/SP1/ZFYVE16/ROCK1/CREBBP/EP300/BMPR2/MAPK1/SMAD4/SMAD2/ACVR2B/ACVR1B/BMPR1A/ZFYVE9/SMAD1/SKP1/ACVR1/NEO1/THSD4/THBS1/SMAD3/PPP2CB/RPS6KB1/SMURF2/RBL1/TGFBR1/FBN1/INHBA/TGFB3/TGFB2/BMP8B/BMPR1B/GREM1	33
hsa05211	Renal cell carcinoma	26/1711	69/8163	0.00103746	0.00855901	0.00685267	PTPN11/RAF1/CREBBP/EP300/SOS2/CRKL/PAK2/ARNT/MAPK1/PIK3CA/GAB1/PIK3CB/BRAF/KRAS/CUL2/CRK/RAP1B/SOS1/NRAS/GRB2/ARNT2/PIK3R1/PIK3R3/EGLN2/TGFB3/TGFB2	26
hsa04930	Type II diabetes mellitus	19/1711	46/8163	0.00136848	0.0110146	0.00881868	SOCS4/MTOR/MAPK1/MAPK8/PIK3CA/PIK3CB/MAPK9/HK1/IRS1/CACNA1D/IKBKB/INSR/PRKCE/HK2/PIK3R1/PIK3R3/KCNJ11/SOCS1/ABCC8	19
hsa05161	Hepatitis B	50/1711	162/8163	0.00180573	0.0141879	0.0113593	CREB1/DDX3X/ATF2/CHUK/RAF1/APAF1/CREBBP/EP300/SOS2/TRAF6/MAPK1/SMAD4/MAPK14/MAPK8/PIK3CA/PIK3CB/BRAF/TBK1/KRAS/MAP3K7/DDB1/STAT3/NFATC3/SOS1/JAK1/YWHAB/MAPK9/MAP3K1/TAB2/TIRAP/RB1/MAVS/MAP2K4/NRAS/NFKB1/SMAD3/BCL2/GRB2/IKBKB/HSPG2/STAT5B/CCNE2/TGFBR1/PIK3R1/PIK3R3/TLR3/TGFB3/DDX58/TGFB2/EGR3	50
hsa04010	MAPK signaling pathway	82/1711	294/8163	0.00242172	0.0185853	0.0148801	NF1/MAP4K3/ATF2/CHUK/RAF1/TAOK1/MAP3K2/SOS2/TRAF6/RASA1/PPM1A/CRKL/PAK2/MAPK1/MAPK14/MAPK8/PPP3CB/BRAF/RAPGEF2/FLNB/KRAS/MAP3K7/TAOK3/CRK/LAMTOR3/NFATC3/RAP1B/ELK4/SOS1/MAP3K4/MAPK9/DUSP16/MAP3K1/TAB2/NLK/HSPA8/RPS6KA5/DUSP3/MAP3K20/MAP2K4/STK4/NRAS/NFKB1/ERBB3/STK3/IGF1R/GRB2/CACNA1D/KITLG/IKBKB/INSR/RPS6KA6/GNG12/ERBB4/CACNA2D1/PDGFC/TGFBR1/ARRB1/PPP3CA/MAPT/CACNA2D2/PDGFD/FGFR1/MAPK8IP1/PDGFRB…	82
hsa01524	Platinum drug resistance	26/1711	73/8163	0.0026482	0.0195789	0.0156756	TOP2B/XIAP/APAF1/MSH3/PDPK1/ATP7A/MAPK1/PIK3CA/PIK3CB/MLH1/MSH6/REV3L/BIRC2/MSH2/BRCA1/ATM/MDM2/BCL2/ATP7B/SLC31A1/PIK3R1/PIK3R3/TOP2A/PMAIP1/GSTM3/ERBB2	26
hsa05226	Gastric cancer	46/1711	149/8163	0.00267836	0.0195789	0.0156756	CSNK1A1/APC/POLK/RAF1/SOS2/MTOR/GSK3B/MAPK1/SMAD4/SMAD2/CTNNA1/PIK3CA/GAB1/CTNNB1/PIK3CB/BRAF/MLH1/KRAS/LRP6/SOS1/RB1/NRAS/SMAD3/BCL2/SHC1/GRB2/RPS6KB1/CCNE2/CCND1/CDKN1B/TGFBR1/AXIN2/PIK3R1/FZD3/PIK3R3/FZD6/WNT3/CDH1/WNT5A/TGFB3/TGFB2/WNT9A/FGF1/FGFR2/ERBB2/FGF10	46
hsa04390	Hippo signaling pathway	48/1711	157/8163	0.00272919	0.0195789	0.0156756	APC/FBXW11/LATS1/DLG1/TEAD1/GSK3B/BMPR2/PRKCI/SMAD4/DLG5/SMAD2/CTNNA1/CTNNB1/PATJ/MOB1A/BMPR1A/MOB1B/BTRC/PPP2R2A/BIRC2/YWHAB/YWHAG/SMAD1/SAV1/FRMD6/SMAD3/LLGL1/STK3/PPP2CB/YAP1/PARD6B/CCND1/TGFBR1/AXIN2/FZD3/AMOT/FZD6/WNT3/CDH1/WNT5A/TGFB3/TGFB2/WNT9A/FGF1/BMP8B/BMPR1B/RASSF6/AREG	48
hsa04110	Cell cycle	40/1711	126/8163	0.00283603	0.0199126	0.0159428	STAG2/CDC23/CREBBP/ORC4/ANAPC1/EP300/STAG1/ORC2/CDC27/RBL2/GSK3B/ATR/SMC3/SMAD4/SMC1A/SMAD2/ABL1/PRKDC/WEE1/YWHAB/YWHAG/TFDP2/RB1/ORC3/SKP1/ATM/MDM2/SMAD3/BUB3/RAD21/MCM2/CCNE2/CCND1/CDC14A/CDKN1B/RBL1/BUB1B/MCM4/TGFB3/TGFB2	40
hsa04071	Sphingolipid signaling pathway	38/1711	119/8163	0.00318402	0.0218902	0.0175261	CERS6/RAF1/ROCK1/SPTLC1/PDPK1/PPP2R5E/ACER2/MAPK1/MAPK14/MAPK8/PIK3CA/PIK3CB/CERS2/PPP2R5D/KRAS/GNA13/PPP2R2A/MAPK9/SGPL1/ROCK2/GNAQ/NRAS/NFKB1/PTEN/SPTLC2/BCL2/PPP2CB/ABCC1/PRKCE/PPP2R5A/ASAH1/PIK3R1/PIK3R3/S1PR3/SGMS2/GAB2/S1PR4/DEGS2	38
hsa04931	Insulin resistance	35/1711	108/8163	0.00346821	0.0230193	0.0184301	CREB1/PTPN11/OGA/PDPK1/MTOR/GSK3B/MAPK8/PIK3CA/PIK3CB/STAT3/MAPK9/PTPRF/PRKAB2/NFKB1/OGT/PTEN/IRS1/GFPT1/RPS6KB1/IKBKB/INSR/PRKCE/PTPN1/RPS6KA6/CPT1A/PIK3R1/PRKAA1/PIK3R3/TBC1D4/PRKAA2/PPP1R3B/SLC27A2/PPP1R3C/ACACB/SREBF1	35
hsa05221	Acute myeloid leukemia	24/1711	67/8163	0.00348777	0.0230193	0.0184301	CHUK/RAF1/SOS2/MTOR/MAPK1/PIK3CA/PIK3CB/BRAF/KRAS/STAT3/SOS1/PER2/NRAS/NFKB1/GRB2/RPS6KB1/IKBKB/RUNX1/STAT5B/CCND1/PIK3R1/PIK3R3/RARA/FLT3	24
hsa03430	Mismatch repair	11/1711	23/8163	0.00364218	0.0235671	0.0188687	RFC1/PMS2/MSH3/MLH3/MLH1/RPA1/MSH6/MSH2/RFC5/POLD3/RFC3	11
hsa05225	Hepatocellular carcinoma	50/1711	168/8163	0.00413494	0.026241	0.0210095	PBRM1/CSNK1A1/ARID2/ARID1A/APC/POLK/SMARCC2/RAF1/SOS2/MTOR/GSK3B/SMARCC1/MAPK1/SMAD4/ARID1B/SMAD2/PIK3CA/GAB1/CTNNB1/PIK3CB/BRAF/KRAS/LRP6/SMARCA2/SOS1/NFE2L2/RB1/ACTL6A/PHF10/NRAS/PTEN/SMAD3/SHC1/IGF1R/GRB2/RPS6KB1/TXNRD1/CCND1/TGFBR1/AXIN2/PIK3R1/FZD3/PIK3R3/FZD6/WNT3/WNT5A/TGFB3/TGFB2/WNT9A/GSTM3	50
hsa04919	Thyroid hormone signaling pathway	38/1711	121/8163	0.00437482	0.0272394	0.0218089	SIN3A/RAF1/CREBBP/MED13L/MED14/EP300/PDPK1/MTOR/GSK3B/NCOA2/ATP2A2/NCOR1/MED13/MAPK1/MED12/PIK3CA/CTNNB1/PIK3CB/KRAS/NOTCH2/NCOA1/NCOA3/ITGAV/ATP1A1/NRAS/MED1/PFKM/MDM2/THRB/CCND1/ESR1/PLCD4/PIK3R1/PIK3R3/TBC1D4/SLC16A2/ATP1B1/PRKACB	38
hsa04360	Axon guidance	53/1711	182/8163	0.00526496	0.0321748	0.0257603	PTPN11/RAF1/ROCK1/ARHGEF12/PDPK1/GSK3B/RASA1/BMPR2/PAK2/MAPK1/PPP3CB/SSH1/PIK3CA/PIK3CB/ABL1/ITGB1/RYK/LRIG2/KRAS/NFATC3/PTK2/ROCK2/SSH2/NRAS/SEMA4F/ENAH/SRGAP1/NEO1/SEMA3C/PARD6B/SEMA5A/PIK3R1/FZD3/UNC5B/PPP3CA/PIK3R3/SEMA3F/SLIT2/SEMA4B/UNC5C/ABLIM1/PLXNC1/SSH3/SEMA6D/WNT5A/LRRC4C/NTN4/ABLIM3/EPHA3/SLIT3/BMPR1B/SEMA3E/SEMA3B	53
hsa05100	Bacterial invasion of epithelial cells	26/1711	77/8163	0.00601569	0.0360941	0.0288983	WASL/SEPTIN2/CRKL/CD2AP/CTNNA1/PIK3CA/GAB1/CTNNB1/PIK3CB/ITGB1/CRK/ACTR2/CBL/PTK2/DOCK1/WASF2/SEPTIN8/VCL/CLTC/SHC1/SEPTIN11/ARHGEF26/PIK3R1/PIK3R3/CDH1/FN1	26
hsa00310	Lysine degradation	22/1711	63/8163	0.00711398	0.0419217	0.0335641	SETD2/ASH1L/NSD1/KMT2D/KMT2E/SETDB1/KMT2C/KMT5B/SETD1B/KMT2A/SETD7/PRDM2/NSD2/DLD/ALDH9A1/NSD3/EZH1/DHTKD1/EHHADH/ALDH3A2/AASS/PLOD2	22
hsa04530	Tight junction	49/1711	169/8163	0.00777043	0.0449867	0.036018	ROCK1/DLG1/PRKCI/MPDZ/MAPK8/MARVELD2/PATJ/MYH10/RAPGEF2/ITGB1/TJP1/MAGI1/OCLN/ACTR2/NEDD4/PPP2R2A/MAPK9/MAP3K1/HSPA4/ROCK2/PRKAB2/AFDN/LLGL1/CGN/JAM3/NEDD4L/PPP2CB/CACNA1D/TUBA1B/RUNX1/PARD6B/RAP2C/PRKCE/RAB8B/CCND1/RDX/AMOTL2/PRKAA1/AMOT/PRKAA2/TIAM1/AMOTL1/CGNL1/SLC9A3R1/MYH14/PRKACB/ERBB2/MYH11/TUBA3D	49
hsa05231	Choline metabolism in cancer	31/1711	98/8163	0.00844864	0.0480699	0.0384866	SP1/RAF1/SOS2/PDPK1/MTOR/MAPK1/MAPK8/TSC1/PIK3CA/PIK3CB/SLC44A1/KRAS/PIP5K1A/SOS1/MAPK9/LYPLA1/WASF2/NRAS/SLC22A5/GRB2/RPS6KB1/DGKH/PDGFC/DGKE/DGKD/PIK3R1/CHPT1/PIK3R3/PDGFD/PDGFRB/SLC44A4	31
hsa00640	Propanoate metabolism	13/1711	32/8163	0.00897442	0.0501959	0.0401888	DBT/SUCLA2/BCKDHB/MMUT/SUCLG2/ALDH6A1/DLD/ACACA/PCCA/EHHADH/ABAT/ACOX3/ACACB	13
hsa05223	Non-small cell lung cancer	24/1711	72/8163	0.00967321	0.0532026	0.042596	POLK/RAF1/SOS2/PDPK1/KIF5B/MAPK1/PIK3CA/PIK3CB/BRAF/KRAS/STAT3/SOS1/RB1/FOXO3/STK4/NRAS/GRB2/STAT5B/CCND1/PIK3R1/KIF5C/PIK3R3/RET/ERBB2	24
hsa05224	Breast cancer	43/1711	147/8163	0.0103039	0.0557425	0.0446295	SP1/CSNK1A1/APC/POLK/RAF1/SOS2/MTOR/GSK3B/MAPK1/PIK3CA/CTNNB1/PIK3CB/BRAF/KRAS/NOTCH2/NCOA1/LRP6/SOS1/NCOA3/RB1/NRAS/BRCA1/PTEN/SHC1/IGF1R/GRB2/RPS6KB1/BRCA2/CCND1/ESR1/AXIN2/PIK3R1/FZD3/PGR/PIK3R3/FZD6/WNT3/FGFR1/WNT5A/WNT9A/FGF1/ERBB2/FGF10	43
hsa04540	Gap junction	28/1711	88/8163	0.010968	0.0583781	0.0467397	RAF1/MAP3K2/SOS2/MAPK1/TJP1/KRAS/ADCY6/SOS1/GNAQ/ITPR1/NRAS/ITPR3/ADCY9/GRB2/TUBA1B/PRKG1/ITPR2/ADCY3/PDGFC/GJA1/LPAR1/PDGFD/GUCY1A2/PDGFRB/ADCY1/PRKACB/ADCY5/TUBA3D	28
hsa03015	mRNA surveillance pathway	30/1711	97/8163	0.0132562	0.0689119	0.0551735	SMG1/CPSF6/PAPOLA/GSPT1/PAPOLG/RNMT/ETF1/SMG6/CPSF2/PPP2R5E/WDR82/NCBP1/NUDT21/SMG7/PCF11/GLE1/CSTF2T/SRRM1/PPP2R5D/RNGTT/CSTF2/MSI2/PPP2R2A/UPF2/HBS1L/CASC3/PPP2CB/NXT2/PPP2R5A/DDX39B	30
hsa04962	Vasopressin-regulated water reabsorption	16/1711	44/8163	0.0133647	0.0689119	0.0551735	CREB1/DCTN4/DYNC1LI2/DYNC1I2/DYNC1H1/DCTN1/RAB5B/DCTN5/DYNC2H1/ADCY6/DYNC2LI1/NSF/RAB11A/ADCY9/ADCY3/PRKACB	16
hsa04915	Estrogen signaling pathway	40/1711	138/8163	0.015198	0.0771591	0.0617765	CREB1/SP1/ATF2/RAF1/SOS2/NCOA2/MAPK1/PIK3CA/PIK3CB/KRAS/ADCY6/NCOA1/SOS1/NCOA3/HSPA8/GNAQ/ITPR1/NRAS/ITPR3/ADCY9/BCL2/SHC1/GRB2/HSP90AA1/FKBP4/ITPR2/ADCY3/ESR1/PIK3R1/PGR/PIK3R3/ADCY1/RARA/KCNJ3/CALML5/PRKACB/ADCY5/KRT16/HSPA2/TFF1	40
hsa05132	Salmonella infection	66/1711	249/8163	0.0196451	0.0982253	0.0786429	PIK3C2A/CHUK/RAF1/WASL/PIK3C3/EXOC5/DCTN4/MYO6/GCC2/KPNA1/TAB3/VPS41/KIF5B/NCKAP1/EXOC4/TRAF6/DYNC1LI2/DYNC1I2/M6PR/DYNC1H1/EXOC7/VPS39/MAPK1/MAPK14/MAPK8/DCTN1/RAB5B/ARL8B/DCTN5/ACBD3/PIK3CA/CTNNB1/PIK3CB/FYCO1/CYFIP1/DYNC2H1/AHNAK/FLNB/SNX18/MAP3K7/ACTR2/DYNC2LI1/KPNA3/DYNLT3/BIRC2/MAPK9/TAB2/TIRAP/ROCK2/SNX9/SKP1/MAP2K4/EXOC2/NFKB1/BCL2/CSE1L/TUBA1B/HSP90AA1/IKBKB/ARHGEF26/KIF5C/PODXL/CYFIP2/R…	66
hsa04512	ECM-receptor interaction	27/1711	88/8163	0.02016	0.0991515	0.0793845	DAG1/ITGB1/ITGAV/ITGA2/THBS1/LAMC1/HSPG2/COL4A5/NPNT/THBS2/LAMA3/SDC4/LAMA2/LAMA5/LAMB2/ITGB5/ITGA3/FN1/COL6A3/ITGA6/COL4A6/THBS4/TNC/COL1A2/ITGA11/LAMC2/CHAD	27
hsa04933	AGE-RAGE signaling pathway in diabetic complications	30/1711	100/8163	0.0204312	0.0991515	0.0793845	MAPK1/SMAD4/MAPK14/MAPK8/SMAD2/PIK3CA/PIK3CB/KRAS/STAT3/MAPK9/NRAS/NFKB1/SMAD3/BCL2/PRKCE/STAT5B/CCND1/COL4A5/CDKN1B/TGFBR1/PLCD4/PIK3R1/PIK3R3/FN1/TGFB3/TGFB2/COL3A1/COL4A6/AGTR1/COL1A2	30
hsa05135	Yersinia infection	39/1711	137/8163	0.0218878	0.104681	0.0838115	PKN2/CHUK/WASL/ROCK1/ARHGEF12/GSK3B/TRAF6/CRKL/MAPK1/MAPK14/MAPK8/PIK3CA/GIT2/PIK3CB/TBK1/ITGB1/MAP3K7/PIP5K1A/CRK/NFATC3/ACTR2/MAPK9/PTK2/TAB2/WIPF2/DOCK1/ROCK2/GNAQ/WASF2/MAP2K4/NFKB1/VAV2/IKBKB/VAV3/RPS6KA6/ARHGEF28/PIK3R1/PIK3R3/FN1	39
hsa05131	Shigellosis	65/1711	247/8163	0.0237811	0.112111	0.0897602	PIK3R4/FBXW11/CHUK/WASL/PIK3C3/ROCK1/TAB3/MTOR/GSK3B/TRAF6/FNBP1L/SEPTIN2/CRKL/BECN1/UBE2D3/MAPK1/MAPK14/MAPK8/ATG14/PIK3CA/PIK3CB/TBK1/PPID/SEPTIN7/ITGB1/MAP3K7/CRK/ACTR2/BTRC/MAPK9/PTK2/TAB2/DOCK1/RPS6KA5/ROCK2/FOXO3/RRAGB/WASF2/SKP1/ITPR1/NFKB1/SEPTIN8/HK1/VCL/RPTOR/ITPR3/ATM/CAST/MDM2/ATG16L1/BCL2/TLN2/RPS6KB1/SEPTIN11/IKBKB/PRKCE/ITPR2/CALCOCO2/HK2/WIPI1/PLCD4/PIK3R1/PIK3R3/TRAF5/CCL5	65
hsa04015	Rap1 signaling pathway	56/1711	210/8163	0.0266473	0.123853	0.0991618	RAF1/FARP2/CRKL/PRKCI/MAPK1/MAPK14/PIK3CA/CTNNB1/PIK3CB/BRAF/MAGI3/RAPGEF2/ITGB1/KRAS/MAGI1/CRK/RAP1B/ADCY6/SIPA1L3/GNAQ/NRAS/ENAH/VAV2/THBS1/AFDN/ADCY9/IGF1R/TLN2/KITLG/RAPGEF5/VAV3/INSR/PARD6B/RAPGEF4/DOCK4/ADCY3/PDGFC/PIK3R1/F2R/SIPA1L2/PIK3R3/LPAR1/PDGFD/TIAM1/FGFR1/PDGFRB/CDH1/TEK/ADCY1/EVL/FGF1/FGFR2/CALML5/FGFR3/ADCY5/FGF10	56
hsa04114	Oocyte meiosis	37/1711	131/8163	0.028185	0.129181	0.103428	CDC23/FBXW11/SLK/ANAPC1/CDC27/SMC3/PPP2R5E/MAPK1/MAPK14/PPP3CB/SMC1A/PPP2R5D/CPEB4/ADCY6/BTRC/YWHAB/YWHAG/CPEB3/CPEB2/SKP1/ITPR1/ITPR3/ADCY9/IGF1R/PPP2CB/ITPR2/CCNE2/PPP2R5A/RPS6KA6/ADCY3/PPP3CA/PGR/AR/ADCY1/CALML5/PRKACB/ADCY5	37
hsa00563	Glycosylphosphatidylinositol (GPI)-anchor biosynthesis	10/1711	26/8163	0.0312755	0.141382	0.113196	PIGN/PIGO/PIGB/PIGK/PIGS/PIGM/PIGG/PIGV/PGAP1/PIGW	10
hsa04960	Aldosterone-regulated sodium reabsorption	13/1711	37/8163	0.0326549	0.145623	0.116592	PDPK1/MAPK1/PIK3CA/PIK3CB/KRAS/ATP1A1/IRS1/NEDD4L/INSR/PIK3R1/PIK3R3/ATP1B1/SCNN1A	13
hsa03440	Homologous recombination	14/1711	41/8163	0.0346885	0.152629	0.122201	PALB2/ABRAXAS1/TOPBP1/NBN/BRCC3/RPA1/MRE11/BARD1/BRCA1/ATM/POLD3/RBBP8/BRCA2/BRIP1	14
hsa05218	Melanoma	22/1711	72/8163	0.0352516	0.153066	0.122551	POLK/RAF1/MAPK1/PIK3CA/PIK3CB/BRAF/KRAS/RB1/NRAS/PTEN/MDM2/IGF1R/CCND1/PDGFC/PIK3R1/PIK3R3/PDGFD/FGFR1/PDGFRB/CDH1/FGF1/FGF10	22
hsa04014	Ras signaling pathway	61/1711	235/8163	0.036118	0.154791	0.123932	NF1/CHUK/RALGAPB/PTPN11/RAF1/RALGAPA1/SOS2/RASA1/PAK2/MAPK1/MAPK8/RAB5B/PIK3CA/GAB1/PIK3CB/TBK1/ABL1/REL/KRAS/ABL2/PLA2G12A/RAP1B/SHOC2/SOS1/RALBP1/MAPK9/EXOC2/STK4/NRAS/NFKB1/AFDN/SYNGAP1/SHC1/IGF1R/GRB2/RALGAPA2/RASAL2/KITLG/IKBKB/RAPGEF5/INSR/GNG12/PDGFC/PIK3R1/PIK3R3/PDGFD/TIAM1/FGFR1/PDGFRB/TEK/GAB2/FGF1/FGFR2/NTRK2/CALML5/PRKACB/FGFR3/FLT3/FGF10/PLA2G2D/PLA2G2A	61
hsa04934	Cushing syndrome	42/1711	155/8163	0.0392179	0.165922	0.132843	CREB1/SP1/USP8/APC/ATF2/RBBP5/GSK3B/KMT2D/ARNT/MAPK1/CTNNB1/BRAF/KMT2A/PBX1/RAP1B/ADCY6/WDR5B/RB1/GNAQ/ITPR1/ITPR3/ADCY9/CACNA1D/ASH2L/ITPR2/CCNE2/ADCY3/CCND1/CDKN1B/NCEH1/AXIN2/FZD3/FZD6/WNT3/WNT5A/LDLR/ADCY1/WNT9A/AGTR1/PRKACB/ADCY5/CACNA1H	42
hsa05163	Human cytomegalovirus infection	58/1711	225/8163	0.0454156	0.189711	0.15189	CREB1/SP1/ATF2/CHUK/RAF1/ROCK1/ARHGEF12/SOS2/MTOR/GSK3B/CRKL/MAPK1/MAPK14/PPP3CB/TSC1/PIK3CA/CTNNB1/PIK3CB/TBK1/KRAS/GNA13/STAT3/CRK/NFATC3/ADCY6/AKAP13/SOS1/JAK1/ARHGEF11/PTK2/ITGAV/RB1/ROCK2/GNAQ/ITPR1/NRAS/NFKB1/ITPR3/MDM2/ADCY9/GRB2/RPS6KB1/IKBKB/ITPR2/GNG12/ADCY3/CCND1/PIK3R1/PPP3CA/PTGER3/PIK3R3/TRAF5/ADCY1/HLA-F/CCL5/CALML5/PRKACB/ADCY5	58
