# Supplementary material for: Breast cancer clinical outcomes and tumor immune microenvironment: cross-dialogue of multiple epigenetic modification profiles
Source: Aging (Albany NY). 2024 May 22;16(10):8998–9022. doi: 10.18632/aging.205853 (PMC11164499; doi:10.18632/aging.205853)
Supplement: Supplementary Table 5 [file aging-16-205853-s005.xlsx]

## Sheet: BRCA_clinical
Supplementary Table 5. The clinical information of breast cancer patients from TCGA database.
	bcr_patient_uuid	patient_id	vital_status	days_to_death	days_to_last_followup	additional_studies	additional_surgery_locoregional_procedure	additional_surgery_metastatic_procedure	age_at_initial_pathologic_diagnosis	anatomic_neoplasm_subdivision-2	anatomic_neoplasm_subdivision-3	anatomic_neoplasm_subdivision-4	anatomic_neoplasm_subdivision-5	anatomic_neoplasm_subdivision	axillary_lymph_node_stage_method_type	axillary_lymph_node_stage_other_method_descriptive_text	b_symptoms	bcr	bcr_canonical_reason-2	bcr_canonical_reason-3	bcr_canonical_reason	bcr_followup_barcode	bcr_followup_uuid	bcr_patient_canonical_status	breast_cancer_surgery_margin_status	breast_carcinoma_estrogen_receptor_status	breast_carcinoma_immunohistochemistry_er_pos_finding_scale	breast_carcinoma_immunohistochemistry_pos_cell_score	breast_carcinoma_immunohistochemistry_progesterone_receptor_pos_finding_scale	breast_carcinoma_primary_surgical_procedure_name	breast_carcinoma_progesterone_receptor_status	breast_carcinoma_surgical_procedure_name	breast_neoplasm_other_surgical_procedure_descriptive_text	clinical_m	clinical_n	clinical_stage	clinical_t	cytokeratin_immunohistochemistry_staining_method_micrometastasis_indicator	day_of_dcc_upload	day_of_form_completion	days_to_additional_surgery_locoregional_procedure	days_to_additional_surgery_metastatic_procedure	days_to_birth	days_to_index	days_to_initial_pathologic_diagnosis	days_to_last_known_alive	days_to_psa	distant_metastasis_present_ind2	drugs
TCGA-5L-AAT0-01A	86c6f993-327f-4525-9983-29c55625593a	aat0	alive	0	1477	NA	NA	NA	42	right lower outer quadrant	NA	NA	NA	right	axillary lymph node dissection alone	NA	NA	nationwide children's hospital	NA	NA	NA	NA	NA	canonical	NA	positive	NA	NA	NA	NA	positive	modified radical mastectomy	NA	NA	NA	NA	NA	no	21	15	NA	NA	-15393	0	0	NA	NA	NA	NA
TCGA-5L-AAT1-01A	16fc3677-0393-4ed1-ad3f-c8355f056369	aat1	alive	0	1471	NA	NA	NA	63	NA	NA	NA	NA	left	other (specify)	level 1 clearance	NA	nationwide children's hospital	NA	NA	NA	NA	NA	canonical	NA	positive	NA	NA	NA	NA	positive	simple mastectomy	NA	NA	NA	NA	NA	no	21	15	NA	NA	-23225	0	0	NA	NA	NA	NA
TCGA-A1-A0SP-01A	a9bb8159-32f0-454c-a946-b3286a52b9d5	a0sp	alive	0	584	NA	NA	NA	40	NA	NA	NA	NA	right	axillary lymph node dissection alone	NA	NA	nationwide children's hospital	NA	NA	NA	NA	NA	canonical	NA	negative	NA	NA	NA	NA	negative	lumpectomy	NA	NA	NA	NA	NA	NA	21	7	NA	NA	-14954	0	0	NA	NA	NA	NA
TCGA-A2-A04V-01A	64f67506-f2df-4f0a-b7be-29b4949e986a	a04v	dead	1920	1920	NA	no	no	39	right	NA	NA	NA	right lower outer quadrant	sentinel node biopsy alone	NA	NA	nationwide children's hospital	NA	NA	NA	tcga-a2-a04v-f10273	8a12f731-0d21-451d-aed9-2677f2356de2	canonical	NA	positive	NA	NA	NA	NA	positive	simple mastectomy	NA	NA	NA	NA	NA	yes	21	18	NA	NA	-14250	0	0	NA	NA	NA	NA
TCGA-A2-A04Y-01A	9ce7ce09-4409-4fa3-9f78-b2b24716f860	a04y	alive	0	1099	NA	NA	NA	53	NA	NA	NA	NA	right upper outer quadrant	sentinel lymph node biopsy plus axillary dissection	NA	NA	nationwide children's hospital	NA	NA	NA	tcga-a2-a04y-f9330	0ce61cba-c744-4182-820c-81c33344dfcd	canonical	NA	positive	NA	NA	NA	NA	positive	simple mastectomy	NA	NA	NA	NA	NA	yes	21	18	NA	NA	-19533	0	0	NA	NA	NA	NA
TCGA-A2-A0CQ-01A	ab34a9a2-d72d-4106-94fb-118844b1b60b	a0cq	alive	0	2695	NA	NA	NA	62	NA	NA	NA	NA	right	sentinel node biopsy alone	NA	NA	nationwide children's hospital	NA	NA	NA	tcga-a2-a0cq-f13723	3276c085-4370-48d5-9ba7-76adde69842d	canonical	negative	positive	NA	NA	NA	lumpectomy	positive	lumpectomy	NA	NA	NA	NA	NA	yes	21	10	NA	NA	-22810	0	0	NA	NA	NA	NA
TCGA-A2-A1G4-01A	e3b555aa-7f0a-49c6-9b13-182c61a144c1	a1g4	alive	0	595	NA	NA	NA	71	NA	NA	NA	NA	right lower outer quadrant	axillary lymph node dissection alone	NA	NA	nationwide children's hospital	NA	NA	NA	tcga-a2-a1g4-f20805	05cf4c23-40fe-4f52-b9e0-3be877bc4f3f	canonical	NA	positive	3 point scale	3+	3 point scale	NA	positive	modified radical mastectomy	NA	NA	NA	NA	NA	no	21	9	NA	NA	-25966	0	0	NA	NA	no	NA
TCGA-A2-A25A-01A	aaea5f9c-b35b-47f8-93cb-bdc7b81844ff	a25a	alive	0	3276	NA	NA	NA	44	NA	NA	NA	NA	left upper inner quadrant	axillary lymph node dissection alone	NA	NA	nationwide children's hospital	NA	NA	NA	tcga-a2-a25a-f30927	23da0430-b849-4d44-91a7-3099f6931b76	canonical	NA	positive	NA	NA	NA	NA	positive	simple mastectomy	NA	NA	NA	NA	NA	yes	21	19	NA	NA	-16084	0	0	NA	NA	no	NA
TCGA-A7-A0CD-01A	09765b0a-94f6-47d2-af56-93368084ac3a	a0cd	alive	0	1165	NA	NA	NA	66	NA	NA	NA	NA	left	sentinel node biopsy alone	NA	NA	nationwide children's hospital	NA	NA	NA	tcga-a7-a0cd-f39827	131c07da-8e6a-44e7-898d-deb2e3d91277	canonical	NA	positive	NA	NA	NA	NA	positive	lumpectomy	NA	NA	NA	NA	NA	no	21	4	NA	NA	-24242	0	0	NA	NA	NA	NA
TCGA-A7-A13G-01A	6cd9baf5-bbe0-4c1e-a87f-c53b3af22890	a13g	alive	0	718	NA	NA	NA	79	NA	NA	NA	NA	left	sentinel node biopsy alone	NA	NA	nationwide children's hospital	NA	NA	ffpe validation	tcga-a7-a13g-f35039	25a9d546-be0a-4f1d-be67-d3d8653307f9	canonical - plus	NA	positive	NA	NA	NA	NA	positive	simple mastectomy	NA	NA	NA	NA	NA	no	21	14	NA	NA	-28969	0	0	NA	NA	no	NA
TCGA-A7-A26E-01A	011b9b2d-ebe5-42bf-9662-d922faccc7a1	a26e	alive	0	954	NA	NA	NA	71	NA	NA	NA	NA	left	sentinel lymph node biopsy plus axillary dissection	NA	NA	nationwide children's hospital	NA	NA	ffpe validation	tcga-a7-a26e-f39792	3eb59670-fb49-4558-a017-3800a97063fb	canonical - plus	NA	positive	3 point scale	NA	3 point scale	NA	positive	simple mastectomy	NA	NA	NA	NA	NA	no	21	1	NA	NA	-26274	0	0	NA	NA	no	NA
TCGA-A7-A26F-01A	3b7b9c1e-a84c-47ed-983c-9e4b00cbf01a	a26f	alive	0	738	NA	NA	NA	55	NA	NA	NA	NA	left	sentinel node biopsy alone	NA	NA	nationwide children's hospital	NA	NA	ffpe validation	tcga-a7-a26f-f38499	29e46924-1fde-481f-bd36-f129490e2fd3	canonical - plus	negative	negative	NA	NA	NA	NA	negative	lumpectomy	NA	NA	NA	NA	NA	no	21	14	NA	NA	-20210	0	0	NA	NA	no	NA
TCGA-A7-A26H-01A	dddd8e2f-e540-418a-b02e-698d18a12c14	a26h	alive	0	724	NA	no	NA	72	NA	NA	NA	NA	left	sentinel lymph node biopsy plus axillary dissection	NA	NA	nationwide children's hospital	NA	NA	NA	tcga-a7-a26h-f39890	5f40a4b3-5b64-42a8-bc00-6dcdcbe7883d	canonical	NA	positive	NA	NA	NA	NA	negative	other	NA	NA	NA	NA	NA	no	21	5	NA	NA	-26423	0	0	NA	NA	no	NA
TCGA-A7-A26I-01A	b2ecbc0f-2c30-4200-8d5e-7b95424bcadb	a26i	alive	0	661	NA	NA	NA	65	NA	NA	NA	NA	left	axillary lymph node dissection alone	NA	NA	nationwide children's hospital	NA	NA	ffpe validation	tcga-a7-a26i-f39791	66a09c74-d0d8-438e-8c18-ec119cb56d3a	canonical - plus	negative	negative	NA	NA	NA	other	negative	lumpectomy	re-excision of superior margin	NA	NA	NA	NA	no	21	1	NA	NA	-23948	0	0	NA	NA	no	NA
TCGA-A7-A2KD-01A	92654f8d-5137-4ffd-aaa3-5ae38eb88226	a2kd	alive	0	679	NA	NA	NA	53	NA	NA	NA	NA	right	no axillary staging	NA	NA	nationwide children's hospital	NA	NA	NA	tcga-a7-a2kd-f39783	0d8a8821-9994-454a-bb39-badc6341a20e	canonical	NA	positive	3 point scale	3+	3 point scale	NA	positive	modified radical mastectomy	NA	NA	NA	NA	NA	no	21	1	NA	NA	-19563	0	0	NA	NA	NA	NA
TCGA-A7-A3J1-01A	8f9ad301-6699-4078-a80d-886e40894af7	a3j1	alive	0	343	NA	NA	NA	63	NA	NA	NA	NA	left	sentinel lymph node biopsy plus axillary dissection	NA	NA	nationwide children's hospital	NA	NA	NA	tcga-a7-a3j1-f36693	b21a2460-afdc-43fe-a22e-a2ddf374a03d	canonical	NA	positive	NA	NA	NA	NA	positive	lumpectomy	NA	NA	NA	NA	NA	NA	21	12	NA	NA	-23209	0	0	NA	NA	no	NA
TCGA-A7-A426-01A	d48e9f25-f083-4f88-a92d-c12d9f765ba6	a426	alive	0	364	NA	NA	NA	50	NA	NA	NA	NA	right	sentinel lymph node biopsy plus axillary dissection	NA	NA	nationwide children's hospital	NA	NA	NA	tcga-a7-a426-f41743	7d3c9088-bc36-4448-a5a3-b00dd0b124f0	canonical	NA	positive	3 point scale	3+	3 point scale	NA	positive	simple mastectomy	NA	NA	NA	NA	NA	yes	21	26	NA	NA	-18296	0	0	NA	NA	NA	NA
TCGA-A7-A5ZX-01A	ba80db4e-d899-4da4-ae49-5263d98e1530	a5zx	alive	0	336	NA	NA	NA	48	NA	NA	NA	NA	left	sentinel lymph node biopsy plus axillary dissection	NA	NA	nationwide children's hospital	NA	NA	germline comparison	tcga-a7-a5zx-f52721	4168828d-e26a-4495-896f-2164a95a9fc2	canonical - plus	NA	positive	3 point scale	NA	3 point scale	NA	positive	other	NA	NA	NA	NA	NA	yes	21	6	NA	NA	-17683	0	0	NA	NA	NA	NA
TCGA-A8-A06T-01A	2c04a2f5-321e-4dea-8e00-268325da65cb	a06t	alive	0	1614	NA	NA	NA	75	NA	NA	NA	NA	left upper outer quadrant	NA	NA	NA	nationwide children's hospital	NA	NA	NA	tcga-a8-a06t-f40816	989e9c4a-0708-4fbe-bc59-efeb8fba5fbb	canonical	NA	positive	NA	NA	NA	NA	positive	other	NA	NA	NA	NA	NA	NA	21	2	NA	NA	-27393	0	0	NA	NA	NA	NA
TCGA-A8-A06U-01A	6bc4c56d-aac5-49a2-9913-9538d06d898f	a06u	dead	883	883	NA	NA	NA	80	NA	NA	NA	NA	right upper outer quadrant	NA	NA	NA	nationwide children's hospital	NA	NA	NA	tcga-a8-a06u-f40817	b73596bb-a8e2-4419-a10a-5fb43a34299b	canonical	NA	positive	NA	NA	NA	NA	positive	other	NA	NA	NA	NA	NA	NA	21	2	NA	NA	-29525	0	0	NA	NA	NA	NA
TCGA-A8-A07E-01A	853456d8-2367-404e-abc9-020fe8bbd209	a07e	alive	0	608	NA	NA	NA	81	NA	NA	NA	NA	left upper outer quadrant	NA	NA	NA	nationwide children's hospital	NA	NA	NA	tcga-a8-a07e-f40825	e36b92b8-aa12-4750-b2dc-517c7abb7c81	canonical	NA	positive	NA	NA	NA	NA	positive	other	NA	NA	NA	NA	NA	NA	21	2	NA	NA	-29800	0	0	NA	NA	NA	NA
TCGA-A8-A084-01A	3dbe99d1-e3b8-4ee2-b6a8-2e2e12c6fbe9	a084	alive	0	458	NA	NA	NA	81	NA	NA	NA	NA	left	NA	NA	NA	nationwide children's hospital	NA	NA	NA	tcga-a8-a084-f40838	f5462e4c-b26a-4a0d-a80c-e8b1595300e0	canonical	NA	positive	NA	NA	NA	NA	negative	other	NA	NA	NA	NA	NA	NA	21	2	NA	NA	-29858	0	0	NA	NA	NA	NA
TCGA-A8-A08F-01A	0a017f15-1c6b-45e7-8d55-e0a71df1b2e8	a08f	alive	0	1004	NA	NA	NA	59	NA	NA	NA	NA	right upper inner quadrant	NA	NA	NA	nationwide children's hospital	NA	NA	NA	tcga-a8-a08f-f40843	6303fb2d-9618-4364-8331-667962f57160	canonical	NA	positive	NA	NA	NA	NA	positive	other	NA	NA	NA	NA	NA	NA	21	2	NA	NA	-21641	0	0	NA	NA	NA	NA
TCGA-A8-A08S-01A	2779fa01-ac93-4e80-a997-3385f72172c3	a08s	alive	0	1004	NA	NA	NA	71	NA	NA	NA	NA	left	NA	NA	NA	nationwide children's hospital	NA	NA	NA	tcga-a8-a08s-f40560	a5d239b1-abc3-4829-a371-345c8e7aa795	canonical	NA	positive	NA	NA	NA	NA	positive	other	NA	NA	NA	NA	NA	NA	21	24	NA	NA	-25994	0	0	NA	NA	NA	NA
TCGA-A8-A091-01A	f39edd06-1016-4e8e-a42e-12f7e699ddc5	a091	alive	0	1004	NA	NA	NA	61	NA	NA	NA	NA	right	NA	NA	NA	nationwide children's hospital	NA	NA	NA	tcga-a8-a091-f40557	5c002ae2-4733-487b-8827-5b108727f910	canonical	NA	positive	NA	NA	NA	NA	negative	other	NA	NA	NA	NA	NA	NA	21	23	NA	NA	-22554	0	0	NA	NA	NA	NA
TCGA-A8-A093-01A	02f5ae33-a563-4ecb-9e33-dfa500a44931	a093	alive	0	546	NA	NA	NA	61	NA	NA	NA	NA	right	NA	NA	NA	nationwide children's hospital	NA	NA	NA	tcga-a8-a093-f40555	376223f3-2a05-4951-b83b-c798ff047dfd	canonical	NA	positive	NA	NA	NA	NA	positive	other	NA	NA	NA	NA	NA	NA	21	23	NA	NA	-22373	0	0	NA	NA	NA	NA
TCGA-A8-A09C-01A	80f3f48a-cc21-415c-b181-c77e7ba1c563	a09c	alive	0	31	NA	NA	NA	69	NA	NA	NA	NA	right	NA	NA	NA	nationwide children's hospital	NA	NA	NA	NA	NA	canonical	NA	positive	NA	NA	NA	NA	positive	other	NA	NA	NA	NA	NA	NA	21	27	NA	NA	-25355	0	0	NA	NA	NA	NA
TCGA-A8-A09E-01A	dfefb76a-ec6b-4cd2-9d45-2e1e4befc7ea	a09e	alive	0	1492	NA	NA	NA	73	NA	NA	NA	NA	left lower outer quadrant	NA	NA	NA	nationwide children's hospital	NA	NA	NA	tcga-a8-a09e-f40334	f6b0c0f3-a72d-419b-8361-645f56b72c5a	canonical	NA	positive	NA	NA	NA	NA	positive	other	NA	NA	NA	NA	NA	NA	21	17	NA	NA	-26724	0	0	NA	NA	NA	NA
TCGA-A8-A09I-01A	1557183c-aedd-4df6-b98a-3654667f7b69	a09i	alive	0	1371	NA	NA	NA	84	NA	NA	NA	NA	right lower outer quadrant	NA	NA	NA	nationwide children's hospital	NA	NA	NA	tcga-a8-a09i-f40333	75a6c6b1-5909-4715-b91f-caaa3cbe8ad0	canonical	NA	positive	NA	NA	NA	NA	positive	other	NA	NA	NA	NA	NA	NA	21	17	NA	NA	-30711	0	0	NA	NA	NA	NA
TCGA-A8-A09K-01A	6f959c92-b79f-4f84-9ee5-d07d3212d52d	a09k	alive	0	912	NA	NA	NA	68	NA	NA	NA	NA	left lower outer quadrant	NA	NA	NA	nationwide children's hospital	NA	NA	NA	tcga-a8-a09k-f40332	094d8dcb-8317-4a5c-8a40-a134add8dbde	canonical	NA	positive	NA	NA	NA	NA	positive	other	NA	NA	NA	NA	NA	NA	21	17	NA	NA	-24960	0	0	NA	NA	NA	NA
TCGA-AC-A3W5-01A	4c313e5b-4dc3-408e-8e92-22427f74743e	a3w5	alive	0	504	NA	NA	NA	65	NA	NA	NA	NA	right	sentinel node biopsy alone	NA	NA	nationwide children's hospital	NA	NA	NA	tcga-ac-a3w5-f56177	cad3f986-fd23-42df-a0e3-b22adae9f1a8	canonical	NA	positive	NA	NA	NA	NA	positive	lumpectomy	NA	NA	NA	NA	NA	yes	21	29	NA	NA	-24029	0	0	NA	NA	NA	NA
TCGA-AC-A3W6-01A	1b4cfad1-e353-4411-97b6-2b7b9309e95e	a3w6	alive	0	602	NA	NA	NA	90	NA	NA	NA	NA	right	sentinel node biopsy alone	NA	NA	nationwide children's hospital	NA	NA	NA	tcga-ac-a3w6-f57046	533c3fb1-7b9b-41b8-8bc4-63c503e2a3ef	canonical	NA	positive	3 point scale	1+	3 point scale	NA	positive	modified radical mastectomy	NA	NA	NA	NA	NA	yes	21	28	NA	NA	-32872	0	0	NA	NA	NA	NA
TCGA-AC-A5EI-01A	01b9f68b-4de4-4374-b4f2-8a0685e18153	a5ei	alive	0	442	NA	NA	NA	88	NA	NA	NA	NA	right upper outer quadrant	sentinel node biopsy alone	NA	NA	nationwide children's hospital	NA	NA	NA	tcga-ac-a5ei-f60184	9ae528aa-45a7-458e-8361-b5b6123ce23d	canonical	NA	positive	NA	NA	NA	NA	positive	simple mastectomy	NA	NA	NA	NA	NA	no	21	31	NA	NA	-32375	0	0	NA	NA	NA	NA
TCGA-AC-A5XS-01A	d9627184-b972-4e00-8c11-b0b946ac357a	a5xs	alive	0	588	NA	NA	NA	74	NA	NA	NA	NA	left upper inner quadrant	sentinel node biopsy alone	NA	NA	nationwide children's hospital	NA	NA	germline comparison	tcga-ac-a5xs-f64108	ba010c17-664a-44b7-acc2-32e13d6552eb	canonical - plus	NA	positive	NA	NA	NA	NA	positive	simple mastectomy	NA	NA	NA	NA	NA	no	21	26	NA	NA	-27160	0	0	NA	NA	NA	NA
TCGA-AC-A62X-01A	5b2a4f11-ca46-4974-9420-59b4820920bf	a62x	alive	0	417	NA	NA	NA	72	NA	NA	NA	NA	left upper inner quadrant	axillary lymph node dissection alone	NA	NA	nationwide children's hospital	NA	NA	NA	tcga-ac-a62x-f64105	197f52a1-868a-492c-8e1b-a887ced07862	canonical	NA	positive	NA	NA	NA	NA	negative	modified radical mastectomy	NA	NA	NA	NA	NA	no	21	26	NA	NA	-26627	0	0	NA	NA	NA	NA
TCGA-AO-A0JI-01A	e17c565c-9857-4df3-a352-903b53093c85	a0ji	alive	0	1528	NA	NA	NA	56	left	NA	NA	NA	left upper outer quadrant	sentinel lymph node biopsy plus axillary dissection	NA	NA	nationwide children's hospital	NA	NA	NA	tcga-ao-a0ji-f19410	ee8f19c6-3bda-4398-96ef-7d72609886e1	canonical	NA	positive	NA	NA	NA	NA	negative	modified radical mastectomy	NA	NA	NA	NA	NA	yes	21	12	NA	NA	-20694	0	0	NA	NA	NA	NA
TCGA-AO-A1KT-01A	1f8f87cb-8a0b-474c-97fb-c71b4fd88d97	a1kt	alive	0	541	NA	NA	NA	78	left	NA	NA	NA	left upper outer quadrant	sentinel node biopsy alone	NA	NA	nationwide children's hospital	NA	NA	NA	tcga-ao-a1kt-f9905	f0b207f5-c16e-4c68-98e9-69d908e9dfb5	canonical	NA	positive	4 point scale	4+	4 point scale	NA	positive	lumpectomy	NA	NA	NA	NA	NA	yes	21	1	NA	NA	-28660	0	0	NA	NA	no	NA
TCGA-AQ-A0Y5-01A	d0b78f3f-a198-437a-ab8c-204345d3b75d	a0y5	dead	172	172	NA	NA	NA	70	NA	NA	NA	NA	right	sentinel lymph node biopsy plus axillary dissection	NA	NA	nationwide children's hospital	NA	NA	NA	tcga-aq-a0y5-f10119	7cb4c161-65d3-44e6-82f7-cdaa2c40d530	canonical	NA	positive	NA	NA	NA	NA	positive	modified radical mastectomy	NA	NA	NA	NA	NA	no	21	7	NA	NA	-25793	0	0	NA	NA	no	NA
TCGA-AQ-A54N-01A	58090433-d8d1-4499-a235-810c3e9d5b74	a54n	alive	0	78	NA	NA	NA	51	NA	NA	NA	NA	left lower inner quadrant	sentinel node biopsy alone	NA	NA	nationwide children's hospital	NA	NA	NA	tcga-aq-a54n-f55736	80219e7c-2608-4b42-b6ec-e9da0d3b6eb5	canonical	NA	negative	NA	NA	NA	NA	negative	lumpectomy	NA	NA	NA	NA	NA	yes	21	14	NA	NA	-18741	0	0	NA	NA	NA	NA
TCGA-AQ-A54O-01A	35ca5e2a-861a-4dd2-a4ce-d294cf080da3	a54o	alive	0	1001	NA	NA	NA	51	NA	NA	NA	NA	right upper outer quadrant	sentinel lymph node biopsy plus axillary dissection	NA	NA	nationwide children's hospital	NA	NA	NA	tcga-aq-a54o-f55731	8b3e15a7-7c5b-4b61-869f-74a0e7751612	canonical	NA	positive	NA	NA	NA	NA	positive	simple mastectomy	NA	NA	NA	NA	NA	yes	21	14	NA	NA	-18694	0	0	NA	NA	NA	NA
TCGA-AQ-A7U7-01A	19015644-9c17-4ae7-a656-0fe8623c04ae	a7u7	dead	584	584	NA	NA	NA	55	NA	NA	NA	NA	left	sentinel lymph node biopsy plus axillary dissection	NA	NA	nationwide children's hospital	NA	NA	NA	tcga-aq-a7u7-f68763	394e58e9-4fb5-4ead-954c-ddb7179f6e8e	canonical	NA	positive	NA	NA	NA	NA	positive	other	NA	NA	NA	NA	NA	yes	21	15	NA	NA	-20239	0	0	NA	NA	NA	NA
TCGA-AR-A1AM-01A	ebd1512a-4865-4193-97b3-f599d555759a	a1am	alive	0	2991	NA	NA	NA	52	NA	NA	NA	NA	right upper outer quadrant	NA	NA	NA	nationwide children's hospital	NA	NA	NA	tcga-ar-a1am-f71733	4eca877e-6675-4be9-9d8e-962797c4e435	canonical	NA	positive	NA	NA	NA	NA	positive	simple mastectomy	NA	NA	NA	NA	NA	NA	21	30	NA	NA	-19123	0	0	NA	NA	NA	NA
TCGA-AR-A1AR-01A	eda6d2d5-4199-4f76-a45b-1d0401b4e54c	a1ar	dead	524	524	NA	NA	NA	50	NA	NA	NA	NA	left lower inner quadrant	axillary lymph node dissection alone	NA	NA	nationwide children's hospital	NA	NA	NA	tcga-ar-a1ar-f21825	9cee3ab5-7f21-46b0-ab2d-b2102dc1113c	canonical	NA	negative	NA	NA	NA	NA	negative	lumpectomy	NA	NA	NA	NA	NA	NA	21	27	NA	NA	-18482	0	0	NA	NA	NA	NA
TCGA-AR-A2LL-01A	70fc011c-0f22-4026-9d72-87351126203a	a2ll	alive	0	2012	NA	NA	NA	70	NA	NA	NA	NA	left	sentinel lymph node biopsy plus axillary dissection	NA	NA	nationwide children's hospital	NA	NA	NA	tcga-ar-a2ll-f49493	a680a628-61d7-4619-a459-87ca6baee1d1	canonical	NA	positive	NA	NA	NA	NA	positive	simple mastectomy	NA	NA	NA	NA	NA	yes	21	2	NA	NA	-25747	0	0	NA	NA	no	NA
TCGA-AR-A2LR-01A	d093173f-08ab-4138-bf3c-399c45a6e163	a2lr	alive	0	1742	NA	NA	NA	49	NA	NA	NA	NA	right	sentinel lymph node biopsy plus axillary dissection	NA	NA	nationwide children's hospital	NA	NA	NA	tcga-ar-a2lr-f71747	e250d902-9f8d-4000-8c72-4dbd74e19452	canonical	NA	negative	NA	NA	NA	NA	negative	simple mastectomy	NA	NA	NA	NA	NA	NA	21	30	NA	NA	-18214	0	0	NA	NA	no	NA
TCGA-AR-A5QM-01A	9c895825-d6f6-4d14-a662-23212200f6e5	a5qm	alive	0	2231	NA	NA	NA	62	NA	NA	NA	NA	left	sentinel lymph node biopsy plus axillary dissection	NA	NA	nationwide children's hospital	NA	NA	NA	tcga-ar-a5qm-f69264	798f4a44-d7b5-4e57-901c-ede79f981be7	canonical	NA	positive	NA	NA	NA	NA	positive	other	NA	NA	NA	NA	NA	NA	21	31	NA	NA	-22780	0	0	NA	NA	NA	NA
TCGA-B6-A0I8-01A	6e6408d6-6c48-4dfc-9f1c-28b7386e87b4	a0i8	dead	749	749	NA	yes	NA	46	right	NA	NA	NA	right upper inner quadrant	no axillary staging	NA	NA	nationwide children's hospital	NA	NA	NA	tcga-b6-a0i8-f12607	939a3148-247e-4863-9e71-a8eb0b343009	canonical	NA	NA	NA	NA	NA	NA	NA	NA	NA	NA	NA	NA	NA	no	21	1	NA	746	-17073	0	0	NA	NA	NA	NA
TCGA-BH-A0B6-01A	fa4e082a-d213-412e-8d91-842a6f4bef12	a0b6	alive	0	2483	NA	NA	NA	47	NA	NA	NA	NA	left upper outer quadrant	NA	NA	NA	nationwide children's hospital	NA	NA	NA	tcga-bh-a0b6-f61943	dbff7e03-09cd-4687-b14c-277d6e8073c5	canonical	NA	positive	NA	NA	NA	NA	positive	other	NA	NA	NA	NA	NA	NA	21	10	NA	NA	-17346	0	0	NA	NA	no	NA
TCGA-BH-A0DO-01A	d3d4d709-ab34-4617-aa8c-51a3d0a3efe6	a0do	alive	0	1644	NA	NA	NA	78	NA	NA	NA	NA	left upper inner quadrant	NA	NA	NA	nationwide children's hospital	case matched methylation control	NA	case matched expression control	tcga-bh-a0do-f63671	609ba6de-5b63-4aba-a085-21880b110253	canonical - plus	NA	positive	NA	NA	NA	NA	positive	simple mastectomy	NA	NA	NA	NA	NA	NA	21	15	NA	NA	-28529	0	0	NA	NA	no	NA
TCGA-BH-A0EA-01A	1f601832-eee3-48fb-acf5-80c4a454f26e	a0ea	dead	991	991	NA	NA	NA	72	NA	NA	NA	NA	left	NA	NA	NA	nationwide children's hospital	NA	NA	NA	tcga-bh-a0ea-f58566	4e9dad81-e003-4ee4-88b8-99136572258c	canonical	NA	positive	NA	NA	NA	NA	positive	other	NA	NA	NA	NA	NA	NA	21	14	NA	NA	-26548	0	0	NA	NA	no	NA
TCGA-BH-A18H-01A	878f975b-94fd-4d69-b7e7-1ed3ac2ee438	a18h	alive	0	652	NA	NA	NA	63	NA	NA	NA	NA	right upper outer quadrant	sentinel lymph node biopsy plus axillary dissection	NA	NA	nationwide children's hospital	NA	NA	NA	tcga-bh-a18h-f59198	975b9460-ca44-4ce3-a700-c1fc9e8c97de	canonical	NA	positive	NA	NA	NA	NA	positive	other	NA	NA	NA	NA	NA	yes	21	2	NA	NA	-23065	0	0	NA	NA	NA	NA
TCGA-BH-A1F5-01A	e663954c-05a8-479a-a623-400c1eb5efc6	a1f5	dead	2712	2712	NA	NA	NA	62	NA	NA	NA	NA	right	NA	NA	NA	nationwide children's hospital	NA	NA	case matched methylation control	NA	NA	canonical - plus	NA	positive	NA	NA	NA	NA	positive	NA	NA	NA	NA	NA	NA	NA	21	7	NA	NA	-22842	0	0	NA	NA	NA	NA
TCGA-BH-A8FY-01A	5f4d16aa-9cc4-4edb-b714-394e2661439a	a8fy	dead	295	295	NA	NA	NA	87	left upper outer quadrant	left lower outer quadrant	NA	NA	left	NA	NA	NA	nationwide children's hospital	NA	NA	NA	NA	NA	canonical	NA	positive	NA	NA	NA	NA	positive	simple mastectomy	NA	NA	NA	NA	NA	NA	21	25	NA	NA	-31932	0	0	NA	NA	NA	NA
TCGA-C8-A1HL-01A	a8a199c9-d781-4e6c-af8c-c85d60c7cd40	a1hl	alive	0	317	NA	NA	NA	38	NA	NA	NA	NA	left	axillary lymph node dissection alone	NA	NA	nationwide children's hospital	NA	NA	NA	tcga-c8-a1hl-f20266	fc4e3c55-61fa-44ef-83ce-5a7beec6b79d	canonical	NA	positive	NA	NA	NA	NA	negative	other	NA	NA	NA	NA	NA	NA	21	9	NA	NA	NA	0	0	NA	NA	no	NA
TCGA-D8-A146-01A	03da7a65-fa2f-42cb-a709-5fe8736f21d3	a146	alive	0	643	NA	NA	NA	57	right	NA	NA	NA	right upper outer quadrant	axillary lymph node dissection alone	NA	NA	nationwide children's hospital	NA	NA	NA	tcga-d8-a146-f20750	33ecae33-7777-48d5-be7f-83396199b0fc	canonical	NA	positive	NA	NA	NA	NA	positive	modified radical mastectomy	NA	NA	NA	NA	NA	no	21	15	NA	NA	-20861	0	0	NA	NA	no	NA
TCGA-E2-A158-01A	a6edb6ca-ae9f-4da7-8ebe-92d83d2987fb	a158	alive	0	450	NA	NA	NA	43	left upper outer quadrant	NA	NA	NA	left upper inner quadrant	sentinel node biopsy alone	NA	NA	nationwide children's hospital	case matched methylation control	germline comparison	case matched expression control	tcga-e2-a158-f18956	24e85cd5-eec3-42fe-a66b-6a8dee474b14	canonical - plus	NA	negative	NA	NA	NA	NA	negative	simple mastectomy	NA	NA	NA	NA	NA	no	21	8	NA	NA	-15903	0	0	NA	NA	no	NA
TCGA-E2-A15O-01A	eafa45a4-2fd1-4fa3-860c-9d52ed382b7d	a15o	alive	0	1545	NA	NA	NA	89	NA	NA	NA	NA	left upper inner quadrant	no axillary staging	NA	NA	nationwide children's hospital	NA	NA	NA	tcga-e2-a15o-f70024	bf01f0ba-cc2c-4473-848a-12b4c360742c	canonical	NA	positive	NA	NA	NA	NA	positive	lumpectomy	NA	NA	NA	NA	NA	no	21	16	NA	NA	-32583	0	0	NA	NA	no	NA
TCGA-E2-A1BC-01A	d8492ebd-3d94-4a4b-8de7-386526691cc2	a1bc	alive	0	501	NA	NA	NA	63	NA	NA	NA	NA	right	sentinel node biopsy alone	NA	NA	nationwide children's hospital	case matched methylation control	germline comparison	case matched expression control	tcga-e2-a1bc-f19427	3d5c68da-26cb-4603-a39e-4bdb247d2704	canonical - plus	NA	positive	3 point scale	NA	3 point scale	NA	positive	simple mastectomy	NA	NA	NA	NA	NA	no	21	8	NA	NA	-23168	0	0	NA	NA	no	NA
TCGA-E2-A1L8-01A	eebad74f-5961-4e91-b0eb-157a2f6f952b	a1l8	alive	0	2240	NA	NA	NA	52	NA	NA	NA	NA	left upper outer quadrant	sentinel lymph node biopsy plus axillary dissection	NA	NA	nationwide children's hospital	NA	NA	NA	tcga-e2-a1l8-f70018	8f1ca815-127e-49be-ab1c-538dc9d42aca	canonical	NA	positive	NA	NA	NA	NA	positive	simple mastectomy	NA	NA	NA	NA	NA	no	21	9	NA	NA	-19187	0	0	NA	NA	no	NA
TCGA-E2-A1LG-01A	ef4cbd38-bc79-4d60-a715-647edd2ebe9e	a1lg	alive	0	1523	NA	NA	NA	50	NA	NA	NA	NA	left upper outer quadrant	axillary lymph node dissection alone	NA	NA	nationwide children's hospital	NA	NA	NA	tcga-e2-a1lg-f70390	f8b62f0a-6f64-498b-826e-51156ed65f81	canonical	NA	negative	NA	NA	NA	NA	negative	modified radical mastectomy	NA	NA	NA	NA	NA	no	21	16	NA	NA	-18492	0	0	NA	NA	no	NA
TCGA-E2-A2P5-01A	f0de67ff-8967-4fce-9c12-0e07193285cd	a2p5	dead	821	821	NA	NA	NA	78	NA	NA	NA	NA	left	axillary lymph node dissection alone	NA	NA	nationwide children's hospital	NA	NA	NA	tcga-e2-a2p5-f68575	76f6e0c5-bd3f-4008-aa91-1e51f54af7df	canonical	NA	positive	NA	NA	NA	NA	positive	modified radical mastectomy	NA	NA	NA	NA	NA	no	21	26	NA	NA	-28621	0	0	NA	NA	no	NA
TCGA-E2-A572-01A	06ef6e83-5583-45b9-a0bd-edea68943083	a572	alive	0	1208	NA	NA	NA	72	NA	NA	NA	NA	left	axillary lymph node dissection alone	NA	NA	nationwide children's hospital	NA	NA	NA	tcga-e2-a572-f65007	1e6255ef-f076-40c9-8a5b-35fc4ff7ca8b	canonical	NA	positive	3 point scale	1+	3 point scale	NA	positive	modified radical mastectomy	NA	NA	NA	NA	NA	yes	21	17	NA	NA	-26399	0	0	NA	NA	NA	NA
TCGA-EW-A1J5-01A	5d8ed961-a012-4b6b-bffb-9468d3953646	a1j5	alive	0	477	NA	NA	NA	59	NA	NA	NA	NA	left	sentinel node biopsy alone	NA	NA	nationwide children's hospital	NA	NA	NA	tcga-ew-a1j5-f21353	b3590ea5-e070-473d-8ccb-be97155ced82	canonical	NA	positive	3 point scale	3+	3 point scale	NA	positive	other	NA	NA	NA	NA	NA	yes	21	6	NA	NA	-21559	0	0	NA	NA	no	NA
TCGA-EW-A1P3-01A	1ff85ada-3cdd-4afb-b311-2c7befb52702	a1p3	alive	0	1611	NA	NA	NA	48	NA	NA	NA	NA	right lower outer quadrant	other (specify)	sn+1 non sentinel node	NA	nationwide children's hospital	NA	NA	NA	tcga-ew-a1p3-f41142	c361f496-f694-4201-844c-066f444499c3	canonical	NA	positive	3 point scale	3+	3 point scale	NA	positive	simple mastectomy	NA	NA	NA	NA	NA	yes	21	12	NA	NA	-17637	0	0	NA	NA	no	NA
TCGA-GM-A2DD-01A	b343bfe0-7c23-4c6a-8c84-9ee39db2ecda	a2dd	alive	0	2282	NA	NA	NA	53	NA	NA	NA	NA	right	sentinel node biopsy alone	NA	NA	nationwide children's hospital	NA	NA	NA	tcga-gm-a2dd-f47070	1ac34321-8651-4f6e-b962-e0e9fc7860ec	canonical	NA	negative	NA	NA	NA	NA	negative	simple mastectomy	NA	NA	NA	NA	NA	yes	21	22	NA	NA	-19415	0	0	NA	NA	no	NA
TCGA-GM-A2DO-01A	5fd37868-4762-4109-9dcf-6fdbab5b645d	a2do	alive	0	2596	NA	NA	NA	54	NA	NA	NA	NA	right upper outer quadrant	sentinel node biopsy alone	NA	NA	nationwide children's hospital	NA	NA	NA	tcga-gm-a2do-f47151	5eab98b3-f7de-4f1b-89a0-346cbba6049e	canonical	NA	positive	NA	NA	NA	NA	positive	lumpectomy	NA	NA	NA	NA	NA	yes	21	22	NA	NA	-19842	0	0	NA	NA	no	NA
TCGA-LD-A74U-01A	38a4e9bd-93e9-432d-a756-3b1055b823bd	a74u	alive	0	402	NA	NA	NA	79	NA	NA	NA	NA	right	axillary lymph node dissection alone	NA	NA	nationwide children's hospital	NA	NA	NA	tcga-ld-a74u-f69186	64202b52-3947-46ff-b25b-9ac52944e2f5	canonical	NA	positive	3 point scale	NA	3 point scale	NA	negative	lumpectomy	NA	NA	NA	NA	NA	NA	21	30	NA	NA	-28981	0	0	NA	NA	NA	NA
TCGA-LL-A440-01A	00b11ca8-8540-4a3d-b602-ec754b00230b	a440	alive	0	759	NA	NA	NA	61	NA	NA	NA	NA	left upper outer quadrant	sentinel node biopsy alone	NA	NA	nationwide children's hospital	NA	NA	NA	tcga-ll-a440-f46387	9524e6ce-345a-422c-963b-8ed916821299	canonical	NA	positive	3 point scale	3+	3 point scale	NA	positive	simple mastectomy	NA	NA	NA	NA	NA	yes	21	7	NA	NA	-22497	0	0	NA	NA	NA	NA
TCGA-LL-A442-01A	3f56d67f-5a9c-4353-9408-e7f60eb6477b	a442	alive	0	889	NA	NA	NA	56	NA	NA	NA	NA	left lower outer quadrant	sentinel node biopsy alone	NA	NA	nationwide children's hospital	NA	NA	NA	tcga-ll-a442-f46384	ab2b5dca-684e-49c8-8594-0a66ad27b2f5	canonical	NA	positive	3 point scale	3+	3 point scale	NA	positive	simple mastectomy	NA	NA	NA	NA	NA	yes	21	7	NA	NA	-20495	0	0	NA	NA	NA	NA
TCGA-LL-A50Y-01A	91da548b-5c64-49c3-a44a-1ef115f53311	a50y	alive	0	762	NA	NA	NA	84	NA	NA	NA	NA	right upper outer quadrant	axillary lymph node dissection alone	NA	NA	nationwide children's hospital	NA	NA	NA	tcga-ll-a50y-f50406	1d4c9ae4-c224-413e-8a94-874fe75f06cf	canonical	NA	positive	3 point scale	2+	3 point scale	NA	positive	modified radical mastectomy	NA	NA	NA	NA	NA	yes	21	23	NA	NA	-30934	0	0	NA	NA	NA	NA
TCGA-LL-A5YP-01A	6d24e675-2fa4-4102-861f-7516650b3049	a5yp	alive	0	450	NA	NA	NA	49	right lower inner quadrant	NA	NA	NA	right	sentinel lymph node biopsy plus axillary dissection	NA	NA	nationwide children's hospital	NA	NA	NA	tcga-ll-a5yp-f59323	447b3e95-78f4-48f2-86f1-c67294c4d37c	canonical	NA	positive	3 point scale	NA	3 point scale	NA	negative	modified radical mastectomy	NA	NA	NA	NA	NA	no	21	8	NA	NA	-18041	0	0	NA	NA	NA	NA
TCGA-LL-A740-01A	aa60fa8d-c374-40e0-af2d-b007701e67e3	a740	alive	0	441	NA	NA	NA	61	NA	NA	NA	NA	right upper outer quadrant	sentinel node biopsy alone	NA	NA	nationwide children's hospital	NA	NA	NA	tcga-ll-a740-f65059	1639524d-0c7a-4f66-8f84-322d2a41c448	canonical	NA	negative	3 point scale	NA	3 point scale	NA	negative	lumpectomy	NA	NA	NA	NA	NA	yes	21	18	NA	NA	-22416	0	0	NA	NA	NA	NA
TCGA-OL-A5RU-01A	b8a44fdf-9cb9-4123-9ab0-4bc198921fee	a5ru	alive	0	1219	NA	NA	NA	63	NA	NA	NA	NA	left upper outer quadrant	sentinel node biopsy alone	NA	NA	nationwide children's hospital	NA	NA	NA	tcga-ol-a5ru-f56569	117af3fa-5687-4518-936e-40cd09bb40e5	canonical	NA	positive	NA	NA	NA	NA	positive	modified radical mastectomy	NA	NA	NA	NA	NA	NA	21	14	NA	NA	-23108	0	0	NA	NA	NA	NA
TCGA-S3-AA12-01A	2bcacfd1-6a45-4b96-9b80-2ad569b1ab45	aa12	alive	0	574	NA	NA	NA	82	left upper inner quadrant	left lower inner quadrant	NA	NA	left	sentinel lymph node biopsy plus axillary dissection	NA	NA	nationwide children's hospital	NA	NA	NA	tcga-s3-aa12-f70442	c4900549-569b-42af-a29a-0c7466a08071	canonical	NA	positive	3 point scale	2+	3 point scale	NA	negative	simple mastectomy	NA	NA	NA	NA	NA	no	21	26	NA	NA	-30101	0	0	NA	NA	NA	NA
TCGA-S3-AA17-01A	49a2fd48-744d-4d88-b9b4-8c778d4f48fd	aa17	alive	0	424	NA	NA	NA	64	right lower outer quadrant	NA	NA	NA	right	sentinel node biopsy alone	NA	NA	nationwide children's hospital	NA	NA	NA	tcga-s3-aa17-f67708	47914404-6847-4d22-91e8-f2ba8618ee3e	canonical	NA	positive	3 point scale	2+	3 point scale	NA	positive	simple mastectomy	NA	NA	NA	NA	NA	yes	21	11	NA	NA	-23642	0	0	NA	NA	NA	NA
TCGA-W8-A86G-01A	90ff48c3-b14b-4a8b-94a1-98c0bab0d27b	a86g	alive	0	347	NA	NA	NA	66	left lower inner quadrant	NA	NA	NA	left	sentinel node biopsy alone	NA	NA	nationwide children's hospital	NA	NA	NA	tcga-w8-a86g-f65574	a38c6d67-17d8-4b82-804f-1ea3a8d16d03	canonical	negative	positive	3 point scale	1+	3 point scale	other	positive	lumpectomy	mastectomy	NA	NA	NA	NA	yes	21	25	NA	NA	-24125	0	0	NA	NA	NA	NA
TCGA-WT-AB41-01A	e7db08a7-b439-4230-8dc4-1b54af4736c4	ab41	alive	0	1611	NA	NA	NA	55	left lower inner quadrant	left lower outer quadrant	NA	NA	left upper outer quadrant	no axillary staging	NA	NA	nationwide children's hospital	NA	NA	NA	tcga-wt-ab41-f66639	bf795d81-b99b-4a0e-9a01-42fdb7f837bd	canonical	NA	positive	3 point scale	1+	3 point scale	NA	positive	modified radical mastectomy	NA	NA	NA	NA	NA	NA	21	21	NA	NA	NA	0	0	NA	NA	NA	NA
TCGA-Z7-A8R5-01A	23f438bd-1dbb-4d46-972f-1e8e74ddbd37	a8r5	alive	0	3287	NA	NA	NA	61	NA	NA	NA	NA	left upper outer quadrant	sentinel lymph node biopsy plus axillary dissection	NA	NA	nationwide children's hospital	NA	NA	NA	tcga-z7-a8r5-f58763	9849e8b7-d2f4-4c6a-b5a4-06d7fb7212b0	canonical	NA	positive	4 point scale	1+	4 point scale	NA	positive	other	NA	NA	NA	NA	NA	yes	21	9	NA	NA	-22280	0	0	NA	NA	NA	NA
TCGA-3C-AAAU-01A	6e7d5ec6-a469-467c-b748-237353c23416	aaau	alive	0	4047	NA	NA	NA	55	NA	NA	NA	NA	left lower outer quadrant	sentinel lymph node biopsy plus axillary dissection	NA	NA	nationwide children's hospital	NA	NA	NA	tcga-3c-aaau-f71341	d7b0bc51-d86f-4554-939e-ea9a24de581d	canonical	NA	positive	NA	NA	NA	NA	positive	modified radical mastectomy	NA	NA	NA	NA	NA	yes	21	24	NA	NA	-20211	0	0	NA	NA	NA	NA
TCGA-3C-AALI-01A	55262fcb-1b01-4480-b322-36570430c917	aali	alive	0	4005	NA	NA	NA	50	NA	NA	NA	NA	right upper outer quadrant	sentinel lymph node biopsy plus axillary dissection	NA	NA	nationwide children's hospital	NA	NA	NA	tcga-3c-aali-f68057	4a52cbb9-665b-420e-8ac4-6a19058f550a	canonical	NA	positive	NA	NA	NA	NA	positive	lumpectomy	NA	NA	NA	NA	NA	NA	21	13	NA	NA	-18538	0	0	NA	NA	NA	NA
TCGA-3C-AALJ-01A	427d0648-3f77-4ffc-b52c-89855426d647	aalj	alive	0	1474	NA	NA	NA	62	NA	NA	NA	NA	right	NA	NA	NA	nationwide children's hospital	NA	NA	NA	tcga-3c-aalj-f71675	ab533ac3-9333-4176-a6e3-e0e03e8a0ffc	canonical	NA	positive	NA	NA	NA	NA	positive	modified radical mastectomy	NA	NA	NA	NA	NA	NA	21	27	NA	NA	-22848	0	0	NA	NA	NA	NA
TCGA-3C-AALK-01A	c31900a4-5dcd-4022-97ac-638e86e889e4	aalk	alive	0	1448	NA	NA	NA	52	NA	NA	NA	NA	right	sentinel node biopsy alone	NA	NA	nationwide children's hospital	NA	NA	NA	tcga-3c-aalk-f71676	9a947236-6ef3-47df-9f4b-e9ac47728f13	canonical	NA	positive	NA	NA	NA	NA	positive	simple mastectomy	NA	NA	NA	NA	NA	yes	21	27	NA	NA	-19074	0	0	NA	NA	NA	NA
TCGA-4H-AAAK-01A	6623fc5e-00be-4476-967a-cbd55f676ea6	aaak	alive	0	348	NA	NA	NA	50	left upper outer quadrant	NA	NA	NA	left	axillary lymph node dissection alone	NA	NA	nationwide children's hospital	NA	NA	NA	tcga-4h-aaak-f67414	2bc6a238-0838-44ab-9dea-7a127ff96bef	canonical	NA	positive	3 point scale	2+	3 point scale	NA	positive	modified radical mastectomy	NA	NA	NA	NA	NA	no	21	13	NA	NA	-18371	0	0	NA	NA	NA	NA
TCGA-5T-A9QA-01A	2fd36838-5a83-433e-ac80-b1f77448e5aa	a9qa	alive	0	303	NA	NA	NA	52	NA	NA	NA	NA	left	no axillary staging	NA	NA	nationwide children's hospital	NA	NA	NA	tcga-5t-a9qa-f66889	5041db15-d0c3-4364-8d32-850cd958c0bb	canonical	NA	positive	3 point scale	NA	NA	NA	negative	NA	NA	NA	NA	NA	NA	no	21	25	NA	NA	-19031	0	0	NA	NA	NA	NA
TCGA-A1-A0SB-01A	0045349c-69d9-4306-a403-c9c1fa836644	a0sb	alive	0	259	NA	NA	NA	70	NA	NA	NA	NA	left	sentinel node biopsy alone	NA	NA	nationwide children's hospital	NA	NA	NA	NA	NA	canonical	NA	positive	NA	NA	NA	NA	negative	lumpectomy	NA	NA	NA	NA	NA	NA	21	30	NA	NA	-25833	0	0	NA	NA	no	NA
TCGA-A1-A0SD-01A	c462e422-eb8d-4daf-9897-2a9c6cbd783a	a0sd	alive	0	437	NA	NA	NA	59	NA	NA	NA	NA	left	sentinel lymph node biopsy plus axillary dissection	NA	NA	nationwide children's hospital	NA	NA	NA	NA	NA	canonical	negative	positive	NA	NA	NA	lumpectomy	positive	lumpectomy	NA	NA	NA	NA	NA	NA	21	7	NA	NA	-21793	0	0	NA	NA	NA	NA
TCGA-A1-A0SE-01A	c397e6c2-ba3a-4f5e-a258-c140611192fe	a0se	alive	0	1321	NA	NA	NA	56	NA	NA	NA	NA	left upper outer quadrant	sentinel lymph node biopsy plus axillary dissection	NA	NA	nationwide children's hospital	NA	NA	NA	NA	NA	canonical	NA	positive	NA	3+	NA	NA	positive	modified radical mastectomy	NA	NA	NA	NA	NA	NA	21	6	NA	NA	-20717	0	0	NA	NA	NA	NA
TCGA-A1-A0SF-01A	4b620966-b4c7-4615-bf58-ca9d3226b9bd	a0sf	alive	0	1463	NA	NA	NA	54	NA	NA	NA	NA	left	sentinel lymph node biopsy plus axillary dissection	NA	NA	nationwide children's hospital	NA	NA	NA	NA	NA	canonical	NA	positive	NA	NA	NA	NA	positive	modified radical mastectomy	NA	NA	NA	NA	NA	NA	21	24	NA	NA	-19731	0	0	NA	NA	no	NA
TCGA-A1-A0SG-01A	0ed9ad26-7fdc-4d75-93f9-d029eee94993	a0sg	alive	0	434	NA	NA	NA	61	NA	NA	NA	NA	right	sentinel lymph node biopsy plus axillary dissection	NA	NA	nationwide children's hospital	NA	NA	NA	NA	NA	canonical	NA	positive	NA	NA	NA	NA	positive	lumpectomy	NA	NA	NA	NA	NA	NA	21	31	NA	NA	-22380	0	0	NA	NA	NA	NA
TCGA-A1-A0SH-01A	a6a863d9-b39d-4965-b47f-79a1bcf3c976	a0sh	alive	0	1437	NA	NA	NA	39	NA	NA	NA	NA	left upper inner quadrant	sentinel node biopsy alone	NA	NA	nationwide children's hospital	NA	NA	NA	NA	NA	canonical	NA	negative	NA	NA	NA	NA	positive	lumpectomy	NA	NA	NA	NA	NA	NA	21	7	NA	NA	-14595	0	0	NA	NA	NA	NA
TCGA-A1-A0SI-01A	16368c32-2118-4fcf-8693-6c89995e49d8	a0si	alive	0	635	NA	NA	NA	52	NA	NA	NA	NA	right	sentinel lymph node biopsy plus axillary dissection	NA	NA	nationwide children's hospital	NA	NA	NA	NA	NA	canonical	NA	positive	NA	NA	NA	NA	positive	lumpectomy	NA	NA	NA	NA	NA	NA	21	30	NA	NA	-19250	0	0	NA	NA	no	NA
TCGA-A1-A0SJ-01A	a2db9dd1-44d5-48b5-817c-a21a85fadb21	a0sj	alive	0	416	NA	NA	NA	39	NA	NA	NA	NA	left	sentinel lymph node biopsy plus axillary dissection	NA	NA	nationwide children's hospital	NA	NA	NA	NA	NA	canonical	NA	positive	NA	NA	NA	NA	positive	modified radical mastectomy	NA	NA	NA	NA	NA	NA	21	6	NA	NA	-14383	0	0	NA	NA	NA	NA
TCGA-A1-A0SK-01A	a5b44d66-c162-46b5-9df2-86305f0385c5	a0sk	dead	967	967	NA	NA	NA	54	NA	NA	NA	NA	right upper outer quadrant	sentinel lymph node biopsy plus axillary dissection	NA	NA	nationwide children's hospital	NA	NA	NA	tcga-a1-a0sk-f15926	5f98c53b-5ee8-444c-9089-1e7ef433117d	canonical	negative	negative	NA	NA	NA	other	negative	lumpectomy	surgical resection	NA	NA	NA	NA	NA	21	7	NA	NA	-20048	0	0	NA	NA	NA	NA
TCGA-A1-A0SM-01A	784de7ac-8424-42eb-83d4-a1bebaa42b97	a0sm	alive	0	242	NA	NA	NA	77	NA	NA	NA	NA	left	sentinel lymph node biopsy plus axillary dissection	NA	NA	nationwide children's hospital	NA	NA	NA	NA	NA	canonical	NA	positive	NA	NA	NA	NA	negative	modified radical mastectomy	NA	NA	NA	NA	NA	NA	21	6	NA	NA	-28198	0	0	NA	NA	NA	NA
TCGA-A1-A0SN-01A	0dc337fa-da8b-42c4-b9a7-fb76d81c161f	a0sn	alive	0	1196	NA	NA	NA	50	NA	NA	NA	NA	left	sentinel lymph node biopsy plus axillary dissection	NA	NA	nationwide children's hospital	NA	NA	NA	NA	NA	canonical	NA	positive	NA	NA	NA	NA	positive	lumpectomy	NA	NA	NA	NA	NA	NA	21	23	NA	NA	-18401	0	0	NA	NA	NA	NA
TCGA-A1-A0SO-01A	6644fd4e-d2fe-4785-a73c-0f36fcc740e2	a0so	alive	0	852	NA	NA	NA	67	NA	NA	NA	NA	right	sentinel lymph node biopsy plus axillary dissection	NA	NA	nationwide children's hospital	NA	NA	NA	NA	NA	canonical	NA	negative	NA	NA	NA	NA	negative	modified radical mastectomy	NA	NA	NA	NA	NA	NA	21	6	NA	NA	-24826	0	0	NA	NA	NA	NA
TCGA-A1-A0SQ-01A	08de63a2-7b76-43c3-80dc-df748b1d81bc	a0sq	alive	0	554	NA	NA	NA	45	NA	NA	NA	NA	left	sentinel lymph node biopsy plus axillary dissection	NA	NA	nationwide children's hospital	NA	NA	NA	NA	NA	canonical	NA	positive	NA	NA	NA	NA	positive	modified radical mastectomy	NA	NA	NA	NA	NA	NA	21	24	NA	NA	-16458	0	0	NA	NA	no	NA
TCGA-A2-A04N-01A	197428f7-bd77-4c5f-8119-87157b5c35b9	a04n	alive	0	4354	NA	NA	NA	66	NA	NA	NA	NA	right	other (specify)	sentinel lymph node biopsy plus non-sentinel lymph node biopsy	NA	nationwide children's hospital	NA	NA	NA	tcga-a2-a04n-f59311	0bce4bb0-63d3-4f46-91b3-622acd436f79	canonical	NA	positive	NA	NA	NA	NA	positive	lumpectomy	NA	NA	NA	NA	NA	yes	21	8	NA	NA	-24155	0	0	NA	NA	NA	NA
TCGA-A2-A04P-01A	ccd4a24b-d8cc-4686-9dee-c98b0c5a8d21	a04p	dead	548	548	NA	no	no	36	NA	NA	NA	NA	left	axillary lymph node dissection alone	NA	NA	nationwide children's hospital	NA	NA	NA	tcga-a2-a04p-f71021	4b4f5fa2-a9fe-49a8-914e-f8256897a51a	canonical	positive	negative	NA	NA	NA	mastectomy nos	negative	lumpectomy	NA	NA	NA	NA	NA	no	21	13	179	NA	-13238	0	0	NA	NA	NA	NA
TCGA-A2-A04Q-01A	b5fba77b-1f50-4e71-95b2-566afba4bdd7	a04q	alive	0	2385	NA	NA	NA	48	right	NA	NA	NA	right upper outer quadrant	other (specify)	sln and non-sln bx	NA	nationwide children's hospital	NA	NA	NA	tcga-a2-a04q-f59314	8c018342-8251-45d4-b7b0-807b5f7bc07b	canonical	NA	negative	NA	NA	NA	NA	negative	simple mastectomy	NA	NA	NA	NA	NA	yes	21	8	NA	NA	-17660	0	0	NA	NA	NA	NA
TCGA-A2-A04R-01A	f3a058b9-fb7f-4098-8f0e-83c2acfa1ed5	a04r	alive	0	3709	NA	NA	NA	36	NA	NA	NA	NA	left upper inner quadrant	sentinel node biopsy alone	NA	NA	nationwide children's hospital	NA	NA	NA	tcga-a2-a04r-f59315	c91d9225-7ad4-4f0c-9851-d37807aa970a	canonical	NA	positive	NA	NA	NA	NA	positive	lumpectomy	NA	NA	NA	NA	NA	yes	21	8	NA	NA	-13483	0	0	NA	NA	NA	NA
TCGA-A2-A04T-01A	b58ad350-5140-4fa8-bc2c-24bca8395f3a	a04t	alive	0	2246	NA	NA	NA	62	NA	NA	NA	NA	left upper inner quadrant	sentinel node biopsy alone	NA	NA	nationwide children's hospital	NA	NA	NA	tcga-a2-a04t-f9343	94203642-8318-4406-9b37-865eb9288015	canonical	NA	negative	NA	NA	NA	NA	negative	lumpectomy	NA	NA	NA	NA	NA	yes	21	17	NA	NA	-22707	0	0	NA	NA	NA	NA
TCGA-A2-A04U-01A	1c3610f7-e0aa-48d7-9a27-0dbaf6e244f9	a04u	alive	0	2654	NA	NA	NA	47	NA	NA	NA	NA	right	sentinel node biopsy alone	NA	NA	nationwide children's hospital	NA	NA	NA	tcga-a2-a04u-f59317	022819fe-3c6c-4ddd-90fd-ebf7bd427042	canonical	NA	negative	NA	NA	NA	NA	negative	simple mastectomy	NA	NA	NA	NA	NA	yes	21	8	NA	NA	-17474	0	0	NA	NA	NA	NA
TCGA-A2-A04W-01A	00807dae-9f4a-4fd1-aac2-82eb11bf2afb	a04w	alive	0	3102	NA	NA	NA	50	NA	NA	NA	NA	right upper outer quadrant	axillary lymph node dissection alone	NA	NA	nationwide children's hospital	NA	NA	NA	tcga-a2-a04w-f59320	b47778fe-e5a6-4e67-86bc-1a39a7c39bfe	canonical	NA	negative	NA	NA	NA	NA	negative	modified radical mastectomy	NA	NA	NA	NA	NA	no	21	8	NA	NA	-18345	0	0	NA	NA	NA	NA
TCGA-A2-A04X-01A	733a2a0f-b37a-4b81-b49e-3c0f30d1eb37	a04x	alive	0	1686	NA	NA	NA	34	NA	NA	NA	NA	left	sentinel node biopsy alone	NA	NA	nationwide children's hospital	NA	NA	NA	tcga-a2-a04x-f9335	ba0997f8-5c6a-44fb-9bc5-b6f5c5dfcfc8	canonical	NA	positive	NA	NA	NA	NA	positive	simple mastectomy	NA	NA	NA	NA	NA	yes	21	18	NA	NA	-12642	0	0	NA	NA	NA	NA
TCGA-A2-A0CK-01A	5aca16ca-4516-4e27-8249-6914029a7ebf	a0ck	alive	0	4159	NA	NA	NA	60	NA	NA	NA	NA	right	sentinel lymph node biopsy plus axillary dissection	NA	NA	nationwide children's hospital	NA	NA	NA	tcga-a2-a0ck-f42396	4ac2c5f2-cf56-492a-b095-c6d9640612e1	canonical	negative	positive	3 point scale	3+	3 point scale	modified radical mastectomy	positive	lumpectomy	NA	NA	NA	NA	NA	no	21	18	NA	NA	-22094	0	0	NA	NA	no	NA
TCGA-A2-A0CL-01A	5c8983f2-9788-4dfa-971c-3ec457b6166e	a0cl	alive	0	3015	NA	NA	NA	37	NA	NA	NA	NA	right lower outer quadrant	axillary lymph node dissection alone	NA	NA	nationwide children's hospital	NA	NA	NA	tcga-a2-a0cl-f59313	ec083639-8177-453d-8451-0bf534de6082	canonical	NA	positive	NA	NA	NA	NA	positive	modified radical mastectomy	NA	NA	NA	NA	NA	no	21	8	NA	NA	-13556	0	0	NA	NA	NA	NA
TCGA-A2-A0CM-01A	eb2dbb4f-66b6-4525-8323-431970f7a64e	a0cm	dead	754	754	NA	no	NA	40	NA	NA	NA	NA	left	sentinel node biopsy alone	NA	NA	nationwide children's hospital	NA	NA	NA	tcga-a2-a0cm-f2013	5609c4a1-d006-4eaf-b197-174caf31d43e	canonical	NA	negative	NA	0	NA	NA	negative	simple mastectomy	NA	NA	NA	NA	NA	yes	21	6	NA	NA	-14969	0	0	NA	NA	NA	NA
TCGA-A2-A0CO-01A	8e54232d-d8bb-4612-8b0e-4feb076a60f9	a0co	dead	3492	3492	NA	NA	NA	85	NA	NA	NA	NA	right	axillary lymph node dissection alone	NA	NA	nationwide children's hospital	NA	NA	NA	tcga-a2-a0co-f42395	d9046e4c-feff-41e2-be64-6931e4173ba9	canonical	NA	positive	3 point scale	2+	3 point scale	NA	positive	modified radical mastectomy	NA	NA	NA	NA	NA	no	21	18	NA	NA	-31404	0	0	NA	NA	no	NA
TCGA-A2-A0CP-01A	fe15c48b-116d-461e-9b40-68514730fd18	a0cp	alive	0	2813	NA	NA	NA	60	NA	NA	NA	NA	right	sentinel node biopsy alone	NA	NA	nationwide children's hospital	NA	NA	NA	tcga-a2-a0cp-f13741	7bf10142-06b6-4d5a-bf38-ae1d5e2468df	canonical	NA	positive	NA	NA	NA	NA	positive	lumpectomy	NA	NA	NA	NA	NA	yes	21	10	NA	NA	-22133	0	0	NA	NA	NA	NA
TCGA-A2-A0CR-01A	4cf0f639-7940-48b6-8ea1-2a3494097cdb	a0cr	alive	0	3283	NA	NA	NA	54	NA	NA	NA	NA	left upper inner quadrant	axillary lymph node dissection alone	NA	NA	nationwide children's hospital	NA	NA	NA	tcga-a2-a0cr-f42400	c3d189cf-d8dd-4b02-9dd3-68cca1f0579f	canonical	NA	positive	3 point scale	3+	3 point scale	NA	positive	modified radical mastectomy	NA	NA	NA	NA	NA	no	21	18	NA	NA	-20075	0	0	NA	NA	no	NA
TCGA-A2-A0CS-01A	d071c16b-7cee-45ed-8ec9-612418143815	a0cs	dead	2348	2348	NA	NA	NA	73	NA	NA	NA	NA	left	axillary lymph node dissection alone	NA	NA	nationwide children's hospital	NA	NA	NA	tcga-a2-a0cs-f59316	b08c8976-e321-45fd-ac53-648fe294b2c1	canonical	NA	positive	NA	NA	NA	NA	positive	modified radical mastectomy	NA	NA	NA	NA	NA	no	21	8	NA	NA	-26817	0	0	NA	NA	NA	NA
TCGA-A2-A0CT-01A	378778d2-b331-4867-a93b-c64028c8b4c7	a0ct	alive	0	2289	NA	NA	NA	71	NA	NA	NA	NA	right upper outer quadrant	sentinel node biopsy alone	NA	NA	nationwide children's hospital	NA	NA	NA	tcga-a2-a0ct-f13730	e5069dec-d655-42b1-81a6-4f008fc9ef78	canonical	NA	positive	NA	0	NA	NA	negative	simple mastectomy	NA	NA	NA	NA	NA	yes	21	9	NA	NA	-25959	0	0	NA	NA	NA	NA
TCGA-A2-A0CU-01A	332423a7-8866-4ee3-b08f-3c8d7c16af80	a0cu	dead	158	158	NA	NA	NA	73	NA	NA	NA	NA	right lower outer quadrant	sentinel node biopsy alone	NA	NA	nationwide children's hospital	NA	NA	NA	tcga-a2-a0cu-f13735	99b03f76-5b6b-4c3c-899f-d63d8fc39c5d	canonical	NA	positive	NA	NA	NA	NA	positive	simple mastectomy	NA	NA	NA	NA	NA	yes	21	10	NA	NA	-26823	0	0	NA	NA	NA	NA
TCGA-A2-A0CV-01A	ad7fcc89-82a3-48aa-8461-581c1a857677	a0cv	alive	0	3011	NA	NA	NA	41	NA	NA	NA	NA	left lower outer quadrant	axillary lymph node dissection alone	NA	NA	nationwide children's hospital	NA	NA	NA	tcga-a2-a0cv-f59321	70efbd77-d291-4618-84f9-617087564f77	canonical	NA	positive	NA	NA	NA	NA	positive	modified radical mastectomy	NA	NA	NA	NA	NA	no	21	8	NA	NA	-15289	0	0	NA	NA	NA	NA
TCGA-A2-A0CW-01A	32efa6e8-6b19-480a-9d04-ace02e93318a	a0cw	alive	0	3283	NA	NA	NA	67	NA	NA	NA	NA	right	sentinel lymph node biopsy plus axillary dissection	NA	NA	nationwide children's hospital	NA	NA	NA	tcga-a2-a0cw-f70690	06e8b614-abd0-4b06-bc35-0fd8fa585c60	canonical	NA	positive	NA	NA	NA	NA	positive	lumpectomy	NA	NA	NA	NA	NA	yes	21	2	NA	NA	-24541	0	0	NA	NA	NA	NA
TCGA-A2-A0CX-01A	c744fc13-3aca-4245-9e24-abd368cc8bef	a0cx	alive	0	1728	NA	NA	NA	52	NA	NA	NA	NA	left	sentinel node biopsy alone	NA	NA	nationwide children's hospital	NA	NA	NA	tcga-a2-a0cx-f13721	2a0b12fb-64f9-49df-acc6-22d1110b827c	canonical	NA	positive	NA	NA	NA	NA	negative	lumpectomy	NA	NA	NA	NA	NA	yes	21	10	NA	NA	-19152	0	0	NA	NA	NA	NA
TCGA-A2-A0CY-01A	757df7b0-4774-4493-98bf-999ded9ac86e	a0cy	alive	0	1673	NA	NA	NA	63	NA	NA	NA	NA	left lower outer quadrant	sentinel lymph node biopsy plus axillary dissection	NA	NA	nationwide children's hospital	NA	NA	NA	tcga-a2-a0cy-f13731	ae7b55f3-f2f1-4fa6-9921-07c9e99f7eeb	canonical	NA	positive	NA	NA	NA	NA	positive	simple mastectomy	NA	NA	NA	NA	NA	yes	21	9	NA	NA	-23229	0	0	NA	NA	NA	NA
TCGA-A2-A0CZ-01A	9f93ea0a-1687-44e0-9e8a-eeb4097d471c	a0cz	alive	0	1616	NA	NA	NA	46	NA	NA	NA	NA	right upper inner quadrant	sentinel node biopsy alone	NA	NA	nationwide children's hospital	NA	NA	NA	tcga-a2-a0cz-f13728	a104937a-eabd-4777-8d6c-1ec71d882f19	canonical	NA	positive	NA	NA	NA	NA	positive	simple mastectomy	NA	NA	NA	NA	NA	yes	21	10	NA	NA	-17026	0	0	NA	NA	NA	NA
TCGA-A2-A0D0-01A	324bcba2-f6a4-45a6-807c-215bdffcca21	a0d0	alive	0	2048	NA	NA	NA	60	NA	NA	NA	NA	left upper outer quadrant	axillary lymph node dissection alone	NA	NA	nationwide children's hospital	NA	NA	NA	tcga-a2-a0d0-f59399	d16c3023-b057-4408-8f50-c78dea6876e1	canonical	NA	negative	NA	0	NA	NA	negative	simple mastectomy	NA	NA	NA	NA	NA	no	21	12	NA	NA	-22115	0	0	NA	NA	NA	NA
TCGA-A2-A0D1-01A	084c6aec-94f7-4090-8f3f-59fa9e89721a	a0d1	alive	0	1051	NA	NA	NA	76	NA	NA	NA	NA	left lower inner quadrant	sentinel node biopsy alone	NA	NA	nationwide children's hospital	NA	NA	NA	tcga-a2-a0d1-f13733	00808159-4015-4b79-b29a-1bbe85bf2cf2	canonical	NA	negative	NA	NA	NA	NA	negative	lumpectomy	NA	NA	NA	NA	NA	yes	21	9	NA	NA	-28084	0	0	NA	NA	NA	NA
TCGA-A2-A0D2-01A	99e32c59-aa73-43fa-88c9-399ddadb2c72	a0d2	alive	0	1027	NA	NA	NA	45	NA	NA	NA	NA	left lower outer quadrant	sentinel node biopsy alone	NA	NA	nationwide children's hospital	NA	NA	NA	tcga-a2-a0d2-f14458	76b9c470-a143-4376-92cb-58317c2c3764	canonical	NA	negative	NA	0	NA	NA	negative	simple mastectomy	NA	NA	NA	NA	NA	yes	21	9	NA	NA	-16623	0	0	NA	NA	NA	NA
TCGA-A2-A0D3-01A	4a16429b-884f-4c95-8683-feeedf0d6a55	a0d3	alive	0	1873	NA	NA	NA	42	NA	NA	NA	NA	left lower outer quadrant	sentinel node biopsy alone	NA	NA	nationwide children's hospital	NA	NA	NA	tcga-a2-a0d3-f59451	a98415cb-b3af-4ef9-a0c2-ee010fc9d9e6	canonical	NA	positive	NA	NA	NA	NA	positive	simple mastectomy	NA	NA	NA	NA	NA	yes	21	13	NA	NA	-15524	0	0	NA	NA	NA	NA
TCGA-A2-A0D4-01A	75113445-d2d6-44a0-866c-c9175e6d214b	a0d4	alive	0	767	NA	NA	NA	37	NA	NA	NA	NA	left	axillary lymph node dissection alone	NA	NA	nationwide children's hospital	NA	NA	NA	tcga-a2-a0d4-f13726	f768a36a-1b8c-45be-9d50-f05e55c3bf24	canonical	NA	positive	NA	NA	NA	NA	positive	lumpectomy	NA	NA	NA	NA	NA	no	21	10	NA	NA	-13805	0	0	NA	NA	NA	NA
TCGA-A2-A0EM-01A	2fdfd287-d13c-4910-9788-73987d45908a	a0em	alive	0	3094	NA	NA	NA	73	NA	NA	NA	NA	right upper inner quadrant	sentinel node biopsy alone	NA	NA	nationwide children's hospital	NA	NA	NA	tcga-a2-a0em-f13714	b2013ac6-e2f9-4125-9f5f-459bae754700	canonical	NA	positive	NA	NA	NA	NA	positive	lumpectomy	NA	NA	NA	NA	NA	yes	21	9	NA	NA	-26845	0	0	NA	NA	NA	NA
TCGA-A2-A0EN-01A	5e670fec-8992-44bf-8657-f7f9a272306b	a0en	alive	0	4088	NA	NA	NA	70	NA	NA	NA	NA	right	sentinel node biopsy alone	NA	NA	nationwide children's hospital	NA	NA	NA	tcga-a2-a0en-f13725	78f26cbf-3ba6-4db3-80c7-c632f90a271b	canonical	NA	positive	NA	NA	NA	NA	positive	lumpectomy	NA	NA	NA	NA	NA	yes	21	10	NA	NA	-25771	0	0	NA	NA	NA	NA
TCGA-A2-A0EO-01A	bf88ddf5-a6d4-498c-bf7f-db9bfabff72d	a0eo	alive	0	2442	NA	NA	NA	54	NA	NA	NA	NA	left	sentinel node biopsy alone	NA	NA	nationwide children's hospital	NA	NA	NA	tcga-a2-a0eo-f13732	934a43f9-9180-48a7-be9d-f50b3e511901	canonical	NA	positive	NA	NA	NA	NA	positive	lumpectomy	NA	NA	NA	NA	NA	yes	21	13	NA	NA	-19880	0	0	NA	NA	NA	NA
TCGA-A2-A0EP-01A	670f5022-5066-48f1-8472-5670129a1e0f	a0ep	alive	0	3603	NA	NA	NA	56	NA	NA	NA	NA	right lower inner quadrant	sentinel node biopsy alone	NA	NA	nationwide children's hospital	NA	NA	NA	tcga-a2-a0ep-f58499	4d539eb8-a316-4209-aa4c-f82a823f47bc	canonical	NA	positive	3 point scale	NA	NA	NA	negative	simple mastectomy	NA	NA	NA	NA	NA	yes	21	11	NA	NA	-20585	0	0	NA	NA	NA	NA
TCGA-A2-A0EQ-01A	2192c1db-4718-4254-ba42-3ae7f30ad5a8	a0eq	alive	0	2426	NA	NA	NA	64	NA	NA	NA	NA	left	other (specify)	sentinel lymph node and non-sentinel lymph node biopsy	NA	nationwide children's hospital	NA	NA	NA	tcga-a2-a0eq-f13720	0d4dc400-90b0-4475-aecb-5547b6ca8bff	canonical	negative	negative	NA	0	NA	lumpectomy	negative	lumpectomy	NA	NA	NA	NA	NA	yes	21	13	NA	NA	-23543	0	0	NA	NA	NA	NA
TCGA-A2-A0ER-01A	7455d832-ad66-40df-85d7-3a7051c4498d	a0er	alive	0	2263	NA	NA	NA	63	NA	NA	NA	NA	right lower inner quadrant	sentinel lymph node biopsy plus axillary dissection	NA	NA	nationwide children's hospital	NA	NA	NA	tcga-a2-a0er-f13719	1d5fc55a-1b4c-4319-89bb-1b2df2c3fe55	canonical	negative	positive	NA	NA	NA	lumpectomy	positive	lumpectomy	NA	NA	NA	NA	NA	yes	21	13	NA	NA	-23021	0	0	NA	NA	NA	NA
TCGA-A2-A0ES-01A	a2934508-3daf-49e2-b14f-ed9b7693f96f	a0es	alive	0	2190	NA	NA	NA	52	NA	NA	NA	NA	left upper outer quadrant	sentinel node biopsy alone	NA	NA	nationwide children's hospital	NA	NA	NA	tcga-a2-a0es-f59395	478ba8b4-7059-4636-9a1a-07f93335c426	canonical	NA	positive	NA	NA	NA	NA	positive	simple mastectomy	NA	NA	NA	NA	NA	yes	21	12	NA	NA	-19160	0	0	NA	NA	NA	NA
TCGA-A2-A0ET-01A	96f23d8a-be0f-4925-ba00-805dc293414c	a0et	alive	0	1066	NA	NA	NA	58	NA	NA	NA	NA	right upper outer quadrant	axillary lymph node dissection alone	NA	NA	nationwide children's hospital	NA	NA	NA	tcga-a2-a0et-f13713	adfe6d4e-59fc-4293-ab60-dc1f69907aee	canonical	NA	positive	NA	NA	NA	NA	positive	lumpectomy	NA	NA	NA	NA	NA	no	21	10	NA	NA	-21464	0	0	NA	NA	NA	NA
TCGA-A2-A0EU-01A	c0427237-b476-4af4-b664-7bd479922ea5	a0eu	alive	0	1043	NA	NA	NA	79	NA	NA	NA	NA	right lower outer quadrant	sentinel node biopsy alone	NA	NA	nationwide children's hospital	NA	NA	NA	tcga-a2-a0eu-f13717	fc478ccd-9561-4f06-81a2-f8ba25c5af85	canonical	negative	positive	NA	NA	NA	lumpectomy	positive	lumpectomy	NA	NA	NA	NA	NA	yes	21	10	NA	NA	-29144	0	0	NA	NA	NA	NA
TCGA-A2-A0EV-01A	7032ec9c-e96b-4642-a7b6-d0aee7a3add2	a0ev	alive	0	968	NA	NA	NA	80	NA	NA	NA	NA	left	sentinel node biopsy alone	NA	NA	nationwide children's hospital	NA	NA	NA	tcga-a2-a0ev-f13712	785b386c-75e3-49aa-a871-a8dd80c39466	canonical	NA	positive	NA	NA	NA	NA	positive	lumpectomy	NA	NA	NA	NA	NA	yes	21	10	NA	NA	-29285	0	0	NA	NA	NA	NA
TCGA-A2-A0EW-01A	8d5fe6e8-d2cc-481f-a6a1-9cb6e7982cde	a0ew	dead	1884	1884	NA	NA	NA	53	NA	NA	NA	NA	right lower outer quadrant	sentinel lymph node biopsy plus axillary dissection	NA	NA	nationwide children's hospital	NA	NA	NA	tcga-a2-a0ew-f59511	195dbe0f-c593-40a4-a0ec-3b0ccbd34de5	canonical	NA	positive	NA	NA	NA	NA	positive	simple mastectomy	NA	NA	NA	NA	NA	yes	21	14	NA	NA	-19413	0	0	NA	NA	NA	NA
TCGA-A2-A0EX-01A	9d8702e1-1a36-4bca-85ab-5f11d58d7953	a0ex	alive	0	752	NA	NA	NA	46	NA	NA	NA	NA	left upper outer quadrant	sentinel node biopsy alone	NA	NA	nationwide children's hospital	NA	NA	NA	tcga-a2-a0ex-f13742	622294e1-0361-4a19-8410-de5e8a4cb231	canonical	negative	positive	NA	NA	NA	mastectomy nos	positive	lumpectomy	NA	NA	NA	NA	NA	yes	21	10	NA	NA	-16858	0	0	NA	NA	NA	NA
TCGA-A2-A0EY-01A	d67cd793-2931-429a-9084-2f3c4c8be7ad	a0ey	alive	0	1925	NA	NA	NA	62	NA	NA	NA	NA	right upper outer quadrant	sentinel lymph node biopsy plus axillary dissection	NA	NA	nationwide children's hospital	NA	NA	NA	tcga-a2-a0ey-f13716	b1ff94bc-9f0b-4998-9ef9-4163baa4f01a	canonical	NA	positive	NA	NA	NA	NA	negative	lumpectomy	NA	NA	NA	NA	NA	yes	21	10	NA	NA	-22872	0	0	NA	NA	NA	NA
TCGA-A2-A0ST-01A	12d31787-e54d-4729-ace8-9141043c92b8	a0st	alive	0	3017	NA	NA	NA	62	NA	NA	NA	NA	right upper outer quadrant	sentinel lymph node biopsy plus axillary dissection	NA	NA	nationwide children's hospital	NA	NA	NA	tcga-a2-a0st-f14035	6e01d82d-ba83-4093-9e7a-387715d2f3a5	canonical	NA	negative	NA	NA	NA	NA	negative	lumpectomy	NA	NA	NA	NA	NA	yes	21	14	NA	NA	-22922	0	0	NA	NA	NA	NA
TCGA-A2-A0SU-01A	c632675e-e8af-43cd-8744-5be3754c1c14	a0su	alive	0	1662	NA	NA	NA	66	NA	NA	NA	NA	left	sentinel node biopsy alone	NA	NA	nationwide children's hospital	NA	NA	NA	tcga-a2-a0su-f13954	95db2cb9-9078-478c-8496-948b59deabe3	canonical	NA	positive	NA	NA	NA	NA	positive	simple mastectomy	NA	NA	NA	NA	NA	yes	21	12	NA	NA	-24219	0	0	NA	NA	NA	NA
TCGA-A2-A0SV-01A	ad01259b-d858-40bc-a6ba-0bb06e996afb	a0sv	dead	825	825	NA	NA	no	63	NA	NA	NA	NA	right	axillary lymph node dissection alone	NA	NA	nationwide children's hospital	NA	NA	NA	tcga-a2-a0sv-f3755	94723553-d507-4fcd-98bb-176f2233f930	canonical	NA	positive	NA	NA	NA	NA	positive	simple mastectomy	NA	NA	NA	NA	NA	no	21	22	NA	NA	-23126	0	0	NA	NA	NA	NA
TCGA-A2-A0SW-01A	991e1427-3c01-423d-abfd-4584302ca72c	a0sw	dead	1365	1365	NA	no	NA	82	NA	NA	NA	NA	right	sentinel lymph node biopsy plus axillary dissection	NA	NA	nationwide children's hospital	NA	NA	NA	tcga-a2-a0sw-f3701	11921c4c-dbdf-41e9-b605-4ff55bb12dde	canonical	NA	positive	NA	NA	NA	NA	negative	lumpectomy	NA	NA	NA	NA	NA	no	21	8	NA	NA	-30085	0	0	NA	NA	NA	NA
TCGA-A2-A0SX-01A	18d35983-ea6a-4b70-a209-9bef37595956	a0sx	alive	0	1534	NA	yes	NA	48	NA	NA	NA	NA	left upper inner quadrant	sentinel node biopsy alone	NA	NA	nationwide children's hospital	NA	NA	NA	tcga-a2-a0sx-f14037	fd49fd62-003e-47c4-82ed-06fdb0e1cf23	canonical	negative	negative	NA	NA	NA	lumpectomy	negative	lumpectomy	NA	NA	NA	NA	NA	yes	21	14	1239	NA	-17774	0	0	NA	NA	NA	NA
TCGA-A2-A0SY-01A	dc696e3c-f448-468f-a576-f4429be0338a	a0sy	alive	0	1347	NA	NA	NA	62	NA	NA	NA	NA	left upper outer quadrant	sentinel lymph node biopsy plus axillary dissection	NA	NA	nationwide children's hospital	NA	NA	NA	tcga-a2-a0sy-f13943	f8198fba-d635-4b1c-82e7-56851120b8b6	canonical	NA	positive	NA	NA	NA	NA	positive	modified radical mastectomy	NA	NA	NA	NA	NA	yes	21	18	NA	NA	-22928	0	0	NA	NA	NA	NA
TCGA-A2-A0T0-01A	95c53f69-0f05-4348-822a-571f3d757001	a0t0	alive	0	533	NA	NA	NA	59	NA	NA	NA	NA	left lower outer quadrant	axillary lymph node dissection alone	NA	NA	nationwide children's hospital	NA	NA	NA	tcga-a2-a0t0-f13944	b0dc7631-8558-431c-b56d-b8c9c74c29f5	canonical	NA	negative	NA	NA	NA	NA	negative	lumpectomy	NA	NA	NA	NA	NA	no	21	18	NA	NA	-21575	0	0	NA	NA	NA	NA
TCGA-A2-A0T1-01A	02bed00f-bef7-4fb7-b243-540354990e45	a0t1	alive	0	521	NA	NA	NA	55	NA	NA	NA	NA	right upper outer quadrant	axillary lymph node dissection alone	NA	NA	nationwide children's hospital	NA	NA	NA	tcga-a2-a0t1-f13946	c7405e45-2c5e-4447-884e-3af0dddf3479	canonical	NA	negative	NA	NA	NA	NA	negative	lumpectomy	NA	NA	NA	NA	NA	no	21	18	NA	NA	-20227	0	0	NA	NA	NA	NA
TCGA-A2-A0T2-01A	128d198e-9b22-427c-90db-3714455f3a17	a0t2	dead	255	255	NA	NA	no	66	NA	NA	NA	NA	right	axillary lymph node dissection alone	NA	NA	nationwide children's hospital	NA	NA	NA	tcga-a2-a0t2-f3706	a366e180-a36c-447c-bdde-931193a02aa4	canonical	NA	negative	NA	NA	NA	NA	negative	modified radical mastectomy	NA	NA	NA	NA	NA	no	21	12	NA	NA	-24235	0	0	NA	NA	NA	NA
TCGA-A2-A0T3-01A	058dcb78-bed1-40c3-a6c2-a0cc40065531	a0t3	alive	0	1516	NA	NA	NA	37	NA	NA	NA	NA	right upper outer quadrant	sentinel lymph node biopsy plus axillary dissection	NA	NA	nationwide children's hospital	NA	NA	NA	tcga-a2-a0t3-f59384	7449e8a7-2b95-489d-ba42-16889ac8e023	canonical	negative	positive	3 point scale	3+	3 point scale	other	positive	lumpectomy	margin resection	NA	NA	NA	NA	yes	21	12	NA	NA	-13680	0	0	NA	NA	no	NA
TCGA-A2-A0T4-01A	b0f8d698-a30e-4d8d-b0a2-a5a01fac8406	a0t4	alive	0	624	NA	NA	NA	62	NA	NA	NA	NA	right upper inner quadrant	other (specify)	sln and non-sln biopsy	NA	nationwide children's hospital	NA	NA	NA	tcga-a2-a0t4-f13948	43b17021-d7a9-468c-8d2b-2554ddebfc47	canonical	NA	positive	NA	2+	NA	NA	positive	simple mastectomy	NA	NA	NA	NA	NA	yes	21	12	NA	NA	-22849	0	0	NA	NA	NA	NA
TCGA-A2-A0T5-01A	36d77496-99f8-4911-ba7c-89fae32662aa	a0t5	alive	0	531	NA	NA	NA	39	NA	NA	NA	NA	left	sentinel node biopsy alone	NA	NA	nationwide children's hospital	NA	NA	NA	tcga-a2-a0t5-f13949	ff9e318b-6811-4218-a62f-2d57aa48a597	canonical	NA	positive	NA	NA	NA	NA	positive	simple mastectomy	NA	NA	NA	NA	NA	yes	21	12	NA	NA	-14503	0	0	NA	NA	NA	NA
TCGA-A2-A0T6-01A	08306ede-e74b-4be9-b768-7fd98647b6ac	a0t6	alive	0	575	NA	NA	NA	50	NA	NA	NA	NA	left	sentinel node biopsy alone	NA	NA	nationwide children's hospital	NA	NA	NA	tcga-a2-a0t6-f13950	2b2337ec-2a4f-453e-8ee6-aa03bc570460	canonical	NA	positive	NA	3+	NA	NA	positive	simple mastectomy	NA	NA	NA	NA	NA	yes	21	12	NA	NA	-18334	0	0	NA	NA	NA	NA
TCGA-A2-A0T7-01A	43d5632e-7272-4aad-9496-7f5a99671223	a0t7	alive	0	631	NA	NA	NA	51	NA	NA	NA	NA	right upper inner quadrant	sentinel node biopsy alone	NA	NA	nationwide children's hospital	NA	NA	NA	tcga-a2-a0t7-f13953	add4998e-ec7f-4b93-8d24-3920ccc4fe34	canonical	negative	positive	NA	2+	NA	other	positive	modified radical mastectomy	skin excision	NA	NA	NA	NA	yes	21	12	NA	NA	-18756	0	0	NA	NA	NA	NA
TCGA-A2-A0YC-01A	a1872011-b928-4189-ac02-e87506c20bca	a0yc	alive	0	990	NA	yes	NA	59	NA	NA	NA	NA	right upper inner quadrant	other (specify)	sentinel lymph node biopsy x 2 and 1 non-sentinel lymph node biopsy	NA	nationwide children's hospital	NA	NA	NA	tcga-a2-a0yc-f15845	c96ebf68-77b8-4d7e-b54f-b4acda34e1bb	canonical	NA	positive	NA	NA	NA	NA	positive	lumpectomy	NA	NA	NA	NA	NA	yes	21	30	NA	756	-21685	0	0	NA	NA	NA	NA
TCGA-A2-A0YD-01A	2c6adb12-380d-4710-a7e6-93d5a0e53289	a0yd	alive	0	769	NA	NA	NA	63	NA	NA	NA	NA	left upper outer quadrant	sentinel node biopsy alone	NA	NA	nationwide children's hospital	NA	NA	NA	tcga-a2-a0yd-f15770	d23505e4-45da-42d1-808a-ca517e53553f	canonical	NA	positive	NA	NA	NA	NA	positive	simple mastectomy	NA	NA	NA	NA	NA	yes	21	30	NA	NA	-23021	0	0	NA	NA	NA	NA
TCGA-A2-A0YE-01A	84a88e8d-1e65-4b88-aae6-bf4c7a7e4c33	a0ye	alive	0	554	NA	NA	NA	48	NA	NA	NA	NA	right upper outer quadrant	sentinel lymph node biopsy plus axillary dissection	NA	NA	nationwide children's hospital	NA	NA	NA	tcga-a2-a0ye-f15771	7d263191-4081-4dd8-9e46-6d37d7714745	canonical	NA	negative	NA	NA	NA	NA	negative	lumpectomy	NA	NA	NA	NA	NA	no	21	30	NA	NA	-17727	0	0	NA	NA	NA	NA
TCGA-A2-A0YF-01A	ae8c77fe-e6c8-44d5-8265-4a38c637bbef	a0yf	alive	0	1535	NA	NA	NA	67	NA	NA	NA	NA	right	sentinel node biopsy alone	NA	NA	nationwide children's hospital	NA	NA	NA	tcga-a2-a0yf-f59385	aee7a858-e746-4b8d-85f5-75d4f0f185f9	canonical	NA	positive	NA	0	NA	NA	negative	simple mastectomy	NA	NA	NA	NA	NA	yes	21	12	NA	NA	-24660	0	0	NA	NA	NA	NA
TCGA-A2-A0YG-01A	c0892598-1f7b-4f23-9cd8-731f797753d5	a0yg	alive	0	666	NA	NA	NA	63	NA	NA	NA	NA	left upper outer quadrant	axillary lymph node dissection alone	NA	NA	nationwide children's hospital	NA	NA	NA	tcga-a2-a0yg-f16753	ae70b861-9d94-44e5-8818-90aa283fd9c6	canonical	NA	positive	NA	2+	NA	NA	positive	lumpectomy	NA	NA	NA	NA	NA	no	21	16	NA	NA	-23058	0	0	NA	NA	NA	NA
TCGA-A2-A0YH-01A	298d33da-15af-48cb-b30f-eaf54e7baa43	a0yh	alive	0	659	NA	NA	NA	53	NA	NA	NA	NA	left lower outer quadrant	axillary lymph node dissection alone	NA	NA	nationwide children's hospital	NA	NA	NA	tcga-a2-a0yh-f16752	72d0ffe4-4fe3-4846-a658-e195ae00fae0	canonical	NA	positive	NA	3+	NA	NA	positive	lumpectomy	NA	NA	NA	NA	NA	no	21	16	NA	NA	-19596	0	0	NA	NA	NA	NA
TCGA-A2-A0YI-01A	72cd1b17-d349-4551-83f7-3062ce9db865	a0yi	alive	0	1505	NA	NA	NA	62	NA	NA	NA	NA	right upper outer quadrant	other (specify)	sentinel lymph node biopsy and one non-sentinel lymph node biopsy	NA	nationwide children's hospital	NA	NA	NA	tcga-a2-a0yi-f59386	c56bf853-8f73-44a9-8701-42ccafa4d028	canonical	NA	positive	NA	2+	NA	NA	positive	lumpectomy	NA	NA	NA	NA	NA	yes	21	12	NA	NA	-22961	0	0	NA	NA	NA	NA
TCGA-A2-A0YJ-01A	796b593f-5886-4a27-bf94-7ea8df325e1a	a0yj	alive	0	566	NA	yes	NA	39	NA	NA	NA	NA	left	axillary lymph node dissection alone	NA	NA	nationwide children's hospital	NA	NA	NA	tcga-a2-a0yj-f16756	717318e8-d1b6-4d8d-8ffc-bba23e110c17	canonical	NA	positive	NA	0	NA	NA	negative	modified radical mastectomy	NA	NA	NA	NA	NA	no	21	16	NA	559	-14448	0	0	NA	NA	NA	NA
TCGA-A2-A0YK-01A	8f34cb4c-5798-47a0-89a1-f0ee26a8ae93	a0yk	alive	0	588	NA	NA	NA	61	left upper outer quadrant	left lower inner quadrant	left lower outer quadrant	NA	left upper inner quadrant	sentinel node biopsy alone	NA	NA	nationwide children's hospital	NA	NA	NA	tcga-a2-a0yk-f16750	5352b4de-d0f2-4460-a22f-4d82a51444fe	canonical	NA	positive	NA	NA	NA	NA	negative	simple mastectomy	NA	NA	NA	NA	NA	yes	21	16	NA	NA	-22625	0	0	NA	NA	NA	NA
TCGA-A2-A0YL-01A	b205c89f-af62-4186-acad-ed23d243fa98	a0yl	alive	0	1474	NA	NA	NA	48	left upper outer quadrant	left lower inner quadrant	left lower outer quadrant	NA	left upper inner quadrant	sentinel lymph node biopsy plus axillary dissection	NA	NA	nationwide children's hospital	NA	NA	NA	tcga-a2-a0yl-f59387	1dad0270-fd03-455c-9a03-28c55a7dc2b7	canonical	NA	positive	NA	3+	NA	NA	positive	simple mastectomy	NA	NA	NA	NA	NA	yes	21	12	NA	NA	-17702	0	0	NA	NA	NA	NA
TCGA-A2-A0YM-01A	5cbf0aea-ebb4-4005-bdd5-14ef2dc6826c	a0ym	alive	0	965	NA	NA	NA	67	NA	NA	NA	NA	left upper outer quadrant	other (specify)	sentinel lymph node biopsy and non-sentinel lymph node biopsy	NA	nationwide children's hospital	NA	NA	NA	tcga-a2-a0ym-f15767	5a91256b-618e-4365-9de5-864fdfc51ee4	canonical	NA	negative	NA	NA	NA	NA	negative	lumpectomy	NA	NA	NA	NA	NA	yes	21	30	NA	NA	-24831	0	0	NA	NA	NA	NA
TCGA-A2-A0YT-01A	14b95463-2108-4921-afc2-e29eef52b18f	a0yt	dead	723	723	NA	NA	NA	56	NA	NA	NA	NA	left upper outer quadrant	axillary lymph node dissection alone	NA	NA	nationwide children's hospital	NA	NA	NA	tcga-a2-a0yt-f15768	11090cd1-89d2-476b-bc1f-aa586743c2a8	canonical	NA	positive	NA	NA	NA	NA	negative	modified radical mastectomy	NA	NA	NA	NA	NA	no	21	30	NA	NA	-20482	0	0	NA	NA	NA	NA
TCGA-A2-A1FV-01A	cd0c96a4-6414-4efb-879b-7408b62ed5b6	a1fv	alive	0	714	NA	NA	NA	74	NA	NA	NA	NA	left	sentinel node biopsy alone	NA	NA	nationwide children's hospital	NA	NA	NA	tcga-a2-a1fv-f20238	ac3fec50-cc82-40e1-968f-65b1b6619c0d	canonical	NA	positive	NA	NA	NA	NA	positive	simple mastectomy	NA	NA	NA	NA	NA	yes	21	9	NA	NA	-27287	0	0	NA	NA	no	NA
TCGA-A2-A1FW-01A	54883111-d475-4515-ba3f-fece8a71e79e	a1fw	alive	0	528	NA	NA	NA	62	NA	NA	NA	NA	right upper outer quadrant	sentinel lymph node biopsy plus axillary dissection	NA	NA	nationwide children's hospital	NA	NA	NA	tcga-a2-a1fw-f20810	45fa1d4f-ecd9-4962-8d88-c93effafbcd2	canonical	NA	positive	NA	NA	NA	NA	negative	modified radical mastectomy	NA	NA	NA	NA	NA	no	21	12	NA	NA	-22779	0	0	NA	NA	no	NA
TCGA-A2-A1FX-01A	ac6d3ba9-f84f-4657-aa85-4d66fb7c09da	a1fx	alive	0	1847	NA	NA	NA	61	NA	NA	NA	NA	right upper outer quadrant	sentinel lymph node biopsy plus axillary dissection	NA	NA	nationwide children's hospital	NA	NA	NA	tcga-a2-a1fx-f59654	90a36b66-1105-46f9-ab5d-538c89e715e1	canonical	negative	positive	NA	NA	NA	mastectomy nos	positive	lumpectomy	NA	NA	NA	NA	NA	no	21	19	NA	NA	-22344	0	0	NA	NA	no	NA
TCGA-A2-A1FZ-01A	805bfe39-3695-43c2-93e4-d66d0559b89f	a1fz	alive	0	683	NA	NA	NA	63	NA	NA	NA	NA	right	sentinel node biopsy alone	NA	NA	nationwide children's hospital	NA	NA	NA	tcga-a2-a1fz-f20803	6fb6d566-9b81-4637-9760-6071e917078b	canonical	NA	positive	3 point scale	3+	3 point scale	NA	positive	simple mastectomy	NA	NA	NA	NA	NA	yes	21	9	NA	NA	-23055	0	0	NA	NA	no	NA
TCGA-A2-A1G0-01A	2e538802-2a31-4774-89a8-c6e4381a887d	a1g0	alive	0	616	NA	NA	NA	49	NA	NA	NA	NA	left upper inner quadrant	sentinel lymph node biopsy plus axillary dissection	NA	NA	nationwide children's hospital	NA	NA	NA	tcga-a2-a1g0-f20802	99faefea-9bbb-42e0-b43e-9020702db5f9	canonical	NA	positive	3 point scale	3+	3 point scale	NA	positive	simple mastectomy	NA	NA	NA	NA	NA	no	21	9	NA	NA	-18002	0	0	NA	NA	no	NA
TCGA-A2-A1G1-01A	75b5529b-565a-4eba-918a-910b2f441d32	a1g1	alive	0	584	NA	NA	NA	85	NA	NA	NA	NA	right upper outer quadrant	sentinel lymph node biopsy plus axillary dissection	NA	NA	nationwide children's hospital	NA	NA	NA	tcga-a2-a1g1-f20808	bf8abe0a-8961-4ec0-9687-21f465824bf8	canonical	NA	negative	NA	NA	NA	NA	negative	lumpectomy	NA	NA	NA	NA	NA	no	21	12	NA	NA	-31223	0	0	NA	NA	no	NA
TCGA-A2-A1G6-01A	295cf595-4a29-46a3-a0c5-e5f08f947031	a1g6	alive	0	501	NA	NA	NA	50	NA	NA	NA	NA	right	axillary lymph node dissection alone	NA	NA	nationwide children's hospital	NA	NA	NA	tcga-a2-a1g6-f20947	3427fd70-83b5-4a78-a617-838013915e15	canonical	NA	negative	NA	NA	NA	NA	negative	modified radical mastectomy	NA	NA	NA	NA	NA	no	21	9	NA	NA	-18514	0	0	NA	NA	no	NA
TCGA-A2-A259-01A	3fc3755d-a3f8-4e2c-813f-ff124f2a75c1	a259	alive	0	1596	NA	NA	NA	70	NA	NA	NA	NA	left	sentinel node biopsy alone	NA	NA	nationwide children's hospital	NA	NA	NA	tcga-a2-a259-f31034	91f2a594-2323-476b-9fe1-3be4b7a05efb	canonical	NA	positive	3 point scale	NA	3 point scale	NA	positive	lumpectomy	NA	NA	NA	NA	NA	yes	21	23	NA	NA	-25666	0	0	NA	NA	no	NA
TCGA-A2-A25B-01A	eadf8482-e60e-4307-adb7-d5c3b9fa6cae	a25b	alive	0	1291	NA	NA	NA	39	NA	NA	NA	NA	left upper outer quadrant	sentinel lymph node biopsy plus axillary dissection	NA	NA	nationwide children's hospital	NA	NA	NA	tcga-a2-a25b-f70679	81c18afe-bea7-4d08-875b-339ffea2e95d	canonical	NA	positive	NA	NA	NA	NA	positive	simple mastectomy	NA	NA	NA	NA	NA	no	21	2	NA	NA	-14454	0	0	NA	NA	no	NA
TCGA-A2-A25C-01A	7aedb46a-48ec-4e0e-8baa-c9ea4c4a7cf1	a25c	alive	0	523	NA	NA	NA	50	NA	NA	NA	NA	left lower outer quadrant	sentinel lymph node biopsy plus axillary dissection	NA	NA	nationwide children's hospital	NA	NA	NA	tcga-a2-a25c-f31282	423be0bb-3129-452b-8f97-bceeb2820ab4	canonical	NA	positive	3 point scale	2+	3 point scale	NA	positive	simple mastectomy	NA	NA	NA	NA	NA	no	21	17	NA	NA	-18508	0	0	NA	NA	no	NA
TCGA-A2-A25D-01A	3b963d72-ba5c-467b-83c9-fbdb462510a3	a25d	alive	0	552	NA	NA	NA	90	NA	NA	NA	NA	right upper outer quadrant	axillary lymph node dissection alone	NA	NA	nationwide children's hospital	NA	NA	NA	tcga-a2-a25d-f30931	41b3dc6f-0aef-40ae-966c-285fc8f9d38e	canonical	NA	positive	NA	NA	NA	NA	negative	lumpectomy	NA	NA	NA	NA	NA	no	21	19	NA	NA	-32872	0	0	NA	NA	no	NA
TCGA-A2-A25E-01A	ba89cb4f-cd63-47b1-9550-76fdaff89f2e	a25e	alive	0	3204	NA	NA	NA	34	NA	NA	NA	NA	left upper outer quadrant	axillary lymph node dissection alone	NA	NA	nationwide children's hospital	NA	NA	NA	tcga-a2-a25e-f44982	6aaa3968-f33a-48e5-afbe-404bf56b0f02	canonical	NA	positive	NA	NA	NA	NA	positive	modified radical mastectomy	NA	NA	NA	NA	NA	no	21	2	NA	NA	-12601	0	0	NA	NA	no	NA
TCGA-A2-A25F-01A	c836951b-3ffb-4e20-8504-0eccb7d50dd4	a25f	alive	0	322	NA	NA	NA	66	NA	NA	NA	NA	right upper outer quadrant	sentinel node biopsy alone	NA	NA	nationwide children's hospital	NA	NA	NA	tcga-a2-a25f-f31197	83bfba11-0da8-4a8e-8851-25f1414d2f33	canonical	NA	negative	NA	NA	NA	NA	positive	lumpectomy	NA	NA	NA	NA	NA	yes	21	23	NA	NA	-24319	0	0	NA	NA	no	NA
TCGA-A2-A3KC-01A	2d29a4ac-98e7-4663-9dd6-5681bc32ac2e	a3kc	alive	0	1102	NA	NA	NA	55	NA	NA	NA	NA	right lower outer quadrant	sentinel lymph node biopsy plus axillary dissection	NA	NA	nationwide children's hospital	NA	NA	NA	tcga-a2-a3kc-f59210	471ed8f4-04bc-465a-a8e7-c1d948b5cbaa	canonical	NA	positive	3 point scale	3+	3 point scale	NA	positive	simple mastectomy	NA	NA	NA	NA	NA	no	21	5	NA	NA	-20401	0	0	NA	NA	no	NA
TCGA-A2-A3KD-01A	bb026999-0aab-4232-96d7-2c93b6c9691d	a3kd	alive	0	1206	NA	NA	NA	47	NA	NA	NA	NA	right upper outer quadrant	sentinel lymph node biopsy plus axillary dissection	NA	NA	nationwide children's hospital	NA	NA	NA	tcga-a2-a3kd-f37343	f2e6f4bd-fa19-43b2-bfcd-124fe5bff06b	canonical	close	positive	3 point scale	NA	3 point scale	mastectomy nos	positive	lumpectomy	NA	NA	NA	NA	NA	yes	21	3	NA	NA	-17372	0	0	NA	NA	no	NA
TCGA-A2-A3XS-01A	a78b04b4-2380-4803-963e-e4e633cd69ab	a3xs	dead	1032	1032	NA	no	NA	62	NA	NA	NA	NA	left upper outer quadrant	sentinel lymph node biopsy plus axillary dissection	NA	NA	nationwide children's hospital	NA	NA	NA	tcga-a2-a3xs-f34446	5bbb886f-91e0-431d-a6dc-e1bb89e95022	canonical	negative	negative	NA	NA	NA	mastectomy nos	negative	lumpectomy	NA	NA	NA	NA	NA	yes	21	15	NA	NA	-23000	0	0	NA	NA	yes	NA
TCGA-A2-A3XT-01A	c72cb184-462d-4009-9cdb-848782ff8a76	a3xt	alive	0	2770	NA	NA	NA	45	NA	NA	NA	NA	left	other (specify)	fna plus axillary lymph node dissection	NA	nationwide children's hospital	NA	NA	NA	tcga-a2-a3xt-f55841	60ea646b-4b74-49e4-8493-ae2da1af4bfa	canonical	NA	negative	NA	NA	NA	NA	negative	modified radical mastectomy	NA	NA	NA	NA	NA	no	21	16	NA	NA	-16649	0	0	NA	NA	NA	NA
TCGA-A2-A3XU-01A	a8e7d8a4-bbf0-496b-b387-8e014cfdcea6	a3xu	dead	912	912	NA	NA	NA	35	NA	NA	NA	NA	left	sentinel lymph node biopsy plus axillary dissection	NA	NA	nationwide children's hospital	NA	NA	NA	tcga-a2-a3xu-f34704	71cbe6d1-7840-4a7c-ab59-ccdf29432ffa	canonical	NA	negative	NA	NA	NA	NA	negative	lumpectomy	NA	NA	NA	NA	NA	no	21	30	NA	NA	-13046	0	0	NA	NA	NA	NA
TCGA-A2-A3XV-01A	189e1f27-7738-413a-a4d4-97d41d592a13	a3xv	alive	0	996	NA	NA	NA	46	NA	NA	NA	NA	right	sentinel node biopsy alone	NA	NA	nationwide children's hospital	NA	NA	NA	tcga-a2-a3xv-f59117	057e80f7-f449-4e70-8571-4d0d06a94c23	canonical	NA	positive	3 point scale	NA	NA	NA	negative	lumpectomy	NA	NA	NA	NA	NA	yes	21	1	NA	NA	-16971	0	0	NA	NA	NA	NA
TCGA-A2-A3XW-01A	c02699b5-580a-4d55-971e-f4692b2cce57	a3xw	alive	0	1712	NA	NA	NA	42	NA	NA	NA	NA	right	sentinel lymph node biopsy plus axillary dissection	NA	NA	nationwide children's hospital	NA	NA	NA	tcga-a2-a3xw-f55843	0965c5d1-3e7f-4325-8355-e437aa49db2b	canonical	NA	positive	3 point scale	NA	NA	NA	negative	simple mastectomy	NA	NA	NA	NA	NA	yes	21	16	NA	NA	-15670	0	0	NA	NA	no	NA
TCGA-A2-A3XX-01A	53886143-c1c6-40e9-88e6-e4e5e0271fc8	a3xx	dead	1439	1439	NA	NA	NA	49	NA	NA	NA	NA	left lower outer quadrant	sentinel node biopsy alone	NA	NA	nationwide children's hospital	NA	NA	NA	tcga-a2-a3xx-f43310	f765b888-581a-4fc9-804a-2fd66f290af9	canonical	NA	negative	NA	NA	NA	NA	negative	simple mastectomy	NA	NA	NA	NA	NA	yes	21	16	NA	NA	-17981	0	0	NA	NA	no	NA
TCGA-A2-A3XY-01A	deba32e4-0e68-4711-941b-3b63bd965afb	a3xy	dead	1093	1093	NA	NA	NA	49	NA	NA	NA	NA	left upper outer quadrant	axillary lymph node dissection alone	NA	NA	nationwide children's hospital	NA	NA	NA	tcga-a2-a3xy-f55836	9c95f754-39ee-4f59-af2d-7f215716d933	canonical	NA	negative	NA	NA	NA	NA	negative	modified radical mastectomy	NA	NA	NA	NA	NA	no	21	16	NA	NA	-18059	0	0	NA	NA	no	NA
TCGA-A2-A3XZ-01A	fe7f74b8-20f4-4471-91dc-4cca8c68e5c0	a3xz	alive	0	1532	NA	NA	NA	46	left upper outer quadrant	NA	NA	NA	left upper inner quadrant	sentinel node biopsy alone	NA	NA	nationwide children's hospital	NA	NA	NA	tcga-a2-a3xz-f58924	16a1fc59-6b05-472b-a7f8-427b5324c1a5	canonical	NA	negative	NA	NA	NA	NA	negative	simple mastectomy	NA	NA	NA	NA	NA	yes	21	28	NA	NA	-16978	0	0	NA	NA	NA	NA
TCGA-A2-A3Y0-01A	174850b4-5ec2-462b-a890-89bd1716b3c2	a3y0	alive	0	1546	NA	NA	NA	57	NA	NA	NA	NA	left upper outer quadrant	axillary lymph node dissection alone	NA	NA	nationwide children's hospital	NA	NA	NA	tcga-a2-a3y0-f59118	1ef24dd9-1163-4d9e-9c00-f0fd9bb65b89	canonical	NA	positive	3 point scale	NA	NA	NA	negative	modified radical mastectomy	NA	NA	NA	NA	NA	no	21	1	NA	NA	-21024	0	0	NA	NA	NA	NA
TCGA-A2-A4RW-01A	0d146997-cfdc-4587-888c-e876fc455c80	a4rw	alive	0	222	NA	NA	NA	49	right upper outer quadrant	NA	NA	NA	right	axillary lymph node dissection alone	NA	NA	nationwide children's hospital	NA	NA	NA	tcga-a2-a4rw-f59123	33b06046-3374-42de-8585-2c4e3130e18b	canonical	NA	positive	3 point scale	3+	3 point scale	NA	positive	modified radical mastectomy	NA	NA	NA	NA	NA	no	21	1	NA	NA	-18060	0	0	NA	NA	NA	NA
TCGA-A2-A4RX-01A	d111c4ab-b39a-4a7c-8d8e-cb342bc10627	a4rx	alive	0	742	NA	NA	NA	67	NA	NA	NA	NA	right lower outer quadrant	sentinel node biopsy alone	NA	NA	nationwide children's hospital	NA	NA	NA	tcga-a2-a4rx-f58491	95b990f4-b105-40dd-a286-0fc1aeb007fe	canonical	NA	positive	3 point scale	2+	3 point scale	NA	positive	simple mastectomy	NA	NA	NA	NA	NA	yes	21	11	NA	NA	-24779	0	0	NA	NA	NA	NA
TCGA-A2-A4RY-01A	5a53ec47-e63f-44a2-8078-87659544fb04	a4ry	alive	0	648	NA	NA	NA	46	NA	NA	NA	NA	right	axillary lymph node dissection alone	NA	NA	nationwide children's hospital	NA	NA	NA	tcga-a2-a4ry-f59208	d3984b99-34df-4ebe-b92b-eadbb216ca0b	canonical	NA	positive	3 point scale	3+	3 point scale	NA	positive	modified radical mastectomy	NA	NA	NA	NA	NA	no	21	5	NA	NA	-17157	0	0	NA	NA	NA	NA
TCGA-A2-A4S0-01A	a53dd490-e0ba-419a-90c6-b905e241a8e5	a4s0	alive	0	706	NA	NA	NA	77	NA	NA	NA	NA	right upper outer quadrant	sentinel node biopsy alone	NA	NA	nationwide children's hospital	NA	NA	NA	tcga-a2-a4s0-f59120	ce1841d4-c855-440f-8bad-e62cf9ee60a7	canonical	NA	positive	3 point scale	2+	3 point scale	NA	positive	simple mastectomy	NA	NA	NA	NA	NA	yes	21	1	NA	NA	-28416	0	0	NA	NA	NA	NA
TCGA-A2-A4S1-01A	843c8f16-5e59-40d4-9ecc-8a75375156f6	a4s1	alive	0	820	NA	NA	NA	66	NA	NA	NA	NA	right upper outer quadrant	sentinel node biopsy alone	NA	NA	nationwide children's hospital	NA	NA	NA	tcga-a2-a4s1-f58925	67a3f1e4-5375-4437-89bd-6ef2eb2bcdcc	canonical	NA	positive	3 point scale	NA	NA	NA	negative	lumpectomy	NA	NA	NA	NA	NA	yes	21	28	NA	NA	-24353	0	0	NA	NA	NA	NA
TCGA-A2-A4S2-01A	9ddc014d-9a8b-407b-845f-452a73f08e5e	a4s2	alive	0	643	NA	NA	NA	62	NA	NA	NA	NA	right	axillary lymph node dissection alone	NA	NA	nationwide children's hospital	NA	NA	NA	tcga-a2-a4s2-f59085	89751129-f1b3-48e2-9375-c334b436639b	canonical	NA	positive	3 point scale	2+	3 point scale	NA	positive	modified radical mastectomy	NA	NA	NA	NA	NA	no	21	30	NA	NA	-22936	0	0	NA	NA	NA	NA
TCGA-A2-A4S3-01A	418c11e8-2670-48d5-bbf5-95b46bff1201	a4s3	alive	0	666	NA	NA	NA	59	NA	NA	NA	NA	left upper outer quadrant	axillary lymph node dissection alone	NA	NA	nationwide children's hospital	NA	NA	NA	tcga-a2-a4s3-f59128	06c49930-b182-44ea-8b71-8fcf2306dd46	canonical	NA	positive	NA	NA	NA	NA	positive	modified radical mastectomy	NA	NA	NA	NA	NA	no	21	1	NA	NA	-21762	0	0	NA	NA	NA	NA
TCGA-A7-A0CE-01A	9d95a65b-e41d-4f93-92d4-99dce29ff40d	a0ce	alive	0	1074	NA	NA	NA	57	NA	NA	NA	NA	left	sentinel lymph node biopsy plus axillary dissection	NA	NA	nationwide children's hospital	case matched methylation control	germline comparison	case matched expression control	tcga-a7-a0ce-f39153	eaec135d-263e-4230-97df-bfeb960b4161	canonical - plus	NA	negative	NA	NA	NA	NA	negative	lumpectomy	NA	NA	NA	NA	NA	yes	21	14	NA	NA	-20863	0	0	NA	NA	NA	NA
TCGA-A7-A0CG-01A	67eef990-5ff4-45d1-843d-d22d7848f130	a0cg	alive	0	1043	NA	NA	NA	78	right	NA	NA	NA	right upper outer quadrant	sentinel lymph node biopsy plus axillary dissection	NA	NA	nationwide children's hospital	NA	NA	NA	tcga-a7-a0cg-f39202	1a0edc84-2e6a-4f64-80e3-f86e7f597e1a	canonical	NA	positive	NA	NA	NA	NA	negative	lumpectomy	NA	NA	NA	NA	NA	yes	21	15	NA	NA	-28596	0	0	NA	NA	NA	NA
TCGA-A7-A0CH-01A	9de678e5-67ed-4453-a98b-7ac351d5d0f1	a0ch	alive	0	1079	NA	NA	NA	79	left	NA	NA	NA	left upper outer quadrant	sentinel node biopsy alone	NA	NA	nationwide children's hospital	case matched methylation control	germline comparison	case matched expression control	tcga-a7-a0ch-f39148	70682038-c827-4f58-a9dc-8433bfce1cf6	canonical - plus	NA	NA	NA	NA	NA	NA	NA	simple mastectomy	NA	NA	NA	NA	NA	yes	21	14	NA	NA	-29104	0	0	NA	NA	NA	NA
TCGA-A7-A0CJ-01A	d69e59a8-b10b-46f5-b859-b6c178d90506	a0cj	alive	0	931	NA	NA	NA	57	NA	NA	NA	NA	left	sentinel lymph node biopsy plus axillary dissection	NA	NA	nationwide children's hospital	NA	NA	NA	tcga-a7-a0cj-f39740	50209fc0-82c7-48de-8cd9-0f33e8125b0e	canonical	NA	positive	NA	NA	NA	other	positive	lumpectomy	re-excision of the inferior margin	NA	NA	NA	NA	yes	21	31	NA	NA	-21014	0	0	NA	NA	NA	NA
TCGA-A7-A0D9-01A	17baef7c-d97d-4b98-ab53-503ef856523d	a0d9	alive	0	1139	NA	NA	NA	37	left	NA	NA	NA	left upper outer quadrant	axillary lymph node dissection alone	NA	NA	nationwide children's hospital	case matched methylation control	germline comparison	case matched expression control	tcga-a7-a0d9-f39771	5570a0d0-8b4a-4607-b2af-33d1b4a7eaf9	canonical - plus	NA	positive	NA	NA	NA	NA	negative	simple mastectomy	NA	NA	NA	NA	NA	yes	21	1	NA	NA	-13836	0	0	NA	NA	NA	NA
TCGA-A7-A0DA-01A	3afa1e93-1df8-4e4c-aaa4-557463f4bb77	a0da	alive	0	1085	NA	NA	NA	62	NA	NA	NA	NA	left lower outer quadrant	sentinel lymph node biopsy plus axillary dissection	NA	NA	nationwide children's hospital	NA	NA	NA	tcga-a7-a0da-f38487	492f04da-fbf7-48d8-99a9-9f4490e79f21	canonical	NA	negative	NA	NA	NA	NA	negative	lumpectomy	NA	NA	NA	NA	NA	NA	21	14	NA	NA	-22708	0	0	NA	NA	NA	NA
TCGA-A7-A0DB-01A	f130f376-5801-40f9-975d-a7e2f7b5670d	a0db	alive	0	1007	NA	NA	NA	56	NA	NA	NA	NA	right	sentinel lymph node biopsy plus axillary dissection	NA	NA	nationwide children's hospital	NA	NA	ffpe validation	tcga-a7-a0db-f38479	675a6559-de14-437a-a6d4-3f931cbcedc7	canonical - plus	NA	positive	NA	NA	NA	NA	positive	simple mastectomy	NA	NA	NA	NA	NA	yes	21	14	NA	NA	-20570	0	0	NA	NA	NA	NA
TCGA-A7-A0DC-01A	cb9f5e50-f49d-4899-8895-9367afcc1015	a0dc	alive	0	906	NA	NA	NA	63	right	NA	NA	NA	right upper outer quadrant	sentinel lymph node biopsy plus axillary dissection	NA	NA	nationwide children's hospital	NA	NA	ffpe validation	tcga-a7-a0dc-f40607	7d70ecb9-709e-4531-b63d-60b752aa7d2a	canonical - plus	NA	positive	NA	NA	NA	NA	negative	simple mastectomy	NA	NA	NA	NA	NA	yes	21	25	NA	NA	-23294	0	0	NA	NA	NA	NA
TCGA-A7-A13D-01A	8785012f-f73e-4d68-87cf-1d804af32782	a13d	alive	0	965	NA	NA	NA	46	NA	NA	NA	NA	right upper outer quadrant	sentinel node biopsy alone	NA	NA	nationwide children's hospital	NA	NA	ffpe validation	tcga-a7-a13d-f39794	6e464627-70af-44be-8ccd-1aa8d584b152	canonical - plus	negative	negative	NA	NA	NA	lumpectomy	positive	lumpectomy	NA	NA	NA	NA	NA	no	21	1	NA	NA	-17070	0	0	NA	NA	NA	NA
TCGA-A7-A13E-01A	8c7e74e0-71ef-49b8-9217-94b8ef740ef9	a13e	dead	614	614	NA	no	NA	62	NA	NA	NA	NA	left upper outer quadrant	sentinel lymph node biopsy plus axillary dissection	NA	NA	nationwide children's hospital	NA	NA	ffpe validation	tcga-a7-a13e-f30405	10f815af-1701-4e90-a5b7-c9a30984bf5e	canonical - plus	NA	positive	NA	NA	NA	NA	negative	lumpectomy	NA	NA	NA	NA	NA	no	21	9	NA	NA	-22690	0	0	NA	NA	NA	NA
TCGA-A7-A13F-01A	2cf68894-168b-458b-af4f-53cad72989a8	a13f	alive	0	765	NA	NA	NA	44	NA	NA	NA	NA	right upper outer quadrant	sentinel lymph node biopsy plus axillary dissection	NA	NA	nationwide children's hospital	case matched methylation control	germline comparison	case matched expression control	tcga-a7-a13f-f39779	c0c53386-68e4-4d29-abf4-1c85462ae7dd	canonical - plus	NA	positive	NA	NA	NA	NA	positive	modified radical mastectomy	NA	NA	NA	NA	NA	no	21	1	NA	NA	-16363	0	0	NA	NA	NA	NA
TCGA-A7-A13H-01A	2e243f0e-9d7d-4cb0-9678-70607f90430a	a13h	alive	0	899	NA	NA	NA	61	NA	NA	NA	NA	right	sentinel lymph node biopsy plus axillary dissection	NA	NA	nationwide children's hospital	NA	NA	NA	tcga-a7-a13h-f41651	c8f6ba58-704d-4f09-8511-4ea0a2c9b96a	canonical	NA	positive	NA	NA	NA	NA	positive	simple mastectomy	NA	NA	NA	NA	NA	yes	21	25	NA	NA	-22643	0	0	NA	NA	no	NA
TCGA-A7-A26G-01A	5ed024e8-d05e-4c65-9441-eda9930ccc82	a26g	alive	0	722	NA	NA	NA	50	NA	NA	NA	NA	right	sentinel lymph node biopsy plus axillary dissection	NA	NA	nationwide children's hospital	NA	NA	NA	tcga-a7-a26g-f39047	1c41020e-8c83-4c5d-8cb2-6926012e4ed9	canonical	NA	negative	NA	NA	NA	NA	negative	other	NA	NA	NA	NA	NA	no	21	9	NA	NA	-18362	0	0	NA	NA	no	NA
TCGA-A7-A26J-01A	6cb6f179-defd-4661-af0a-c353b74c0c49	a26j	alive	0	627	NA	NA	NA	49	NA	NA	NA	NA	left	sentinel lymph node biopsy plus axillary dissection	NA	NA	nationwide children's hospital	NA	NA	ffpe validation	tcga-a7-a26j-f39793	33485a24-db2a-469d-bf9a-d0b33df4a20e	canonical - plus	NA	positive	3 point scale	NA	3 point scale	NA	positive	simple mastectomy	NA	NA	NA	NA	NA	no	21	1	NA	NA	-17930	0	0	NA	NA	no	NA
TCGA-A7-A3IY-01A	6b4e0262-f589-4532-b578-9f2d76c19d90	a3iy	alive	0	345	NA	NA	NA	71	NA	NA	NA	NA	right upper outer quadrant	sentinel node biopsy alone	NA	NA	nationwide children's hospital	NA	NA	NA	tcga-a7-a3iy-f33856	bc3680df-06d0-4445-9db2-63b4ec299c1c	canonical	negative	positive	NA	NA	NA	lumpectomy	positive	lumpectomy	NA	NA	NA	NA	NA	no	21	20	NA	NA	-26042	0	0	NA	NA	no	NA
TCGA-A7-A3IZ-01A	15ff4b02-bb69-4d24-8a07-b82f428e428d	a3iz	alive	0	322	NA	NA	NA	62	NA	NA	NA	NA	right	sentinel lymph node biopsy plus axillary dissection	NA	NA	nationwide children's hospital	NA	NA	NA	tcga-a7-a3iz-f34491	69577ec0-0532-4a9c-bcba-5a79e096d13b	canonical	negative	positive	NA	NA	NA	other	negative	lumpectomy	reexcision	NA	NA	NA	NA	yes	21	16	NA	NA	-22997	0	0	NA	NA	no	NA
TCGA-A7-A3J0-01A	da70cf7e-0e61-4c72-b4c5-c408569d11b8	a3j0	alive	0	313	NA	NA	NA	62	NA	NA	NA	NA	right	sentinel node biopsy alone	NA	NA	nationwide children's hospital	NA	NA	NA	tcga-a7-a3j0-f35965	b63f8878-c317-4d4a-8da0-9a3b4acefea4	canonical	NA	positive	NA	NA	NA	NA	positive	lumpectomy	NA	NA	NA	NA	NA	no	21	12	NA	NA	-22672	0	0	NA	NA	no	NA
TCGA-A7-A3RF-01A	7451af3c-acc0-4d79-8429-6b8be96911d8	a3rf	alive	0	408	NA	NA	NA	79	NA	NA	NA	NA	left upper outer quadrant	sentinel node biopsy alone	NA	NA	nationwide children's hospital	NA	NA	NA	tcga-a7-a3rf-f40413	ac15b3b7-ebcc-4ccb-9491-7d2ba72cf137	canonical	negative	positive	NA	NA	NA	other	positive	lumpectomy	left breast reexcision	NA	NA	NA	NA	no	21	19	NA	NA	-29184	0	0	NA	NA	NA	NA
TCGA-A7-A425-01A	a8f5c479-8685-4e2d-bb60-63f1cc651083	a425	alive	0	447	NA	NA	NA	70	NA	NA	NA	NA	right	sentinel lymph node biopsy plus axillary dissection	NA	NA	nationwide children's hospital	NA	NA	NA	tcga-a7-a425-f41648	8ee1daaf-2efe-4ca4-b494-4674a8ac9c79	canonical	NA	positive	3 point scale	2+	3 point scale	NA	positive	modified radical mastectomy	NA	NA	NA	NA	NA	yes	21	25	NA	NA	-25678	0	0	NA	NA	NA	NA
TCGA-A7-A4SA-01A	a2efe7e1-aca3-440f-825f-ed621edca69f	a4sa	alive	0	454	NA	NA	NA	40	NA	NA	NA	NA	left lower outer quadrant	sentinel lymph node biopsy plus axillary dissection	NA	NA	nationwide children's hospital	NA	NA	germline comparison	tcga-a7-a4sa-f49560	8ee2b4a8-14ad-4a21-9746-83d9a7f27f14	canonical - plus	NA	positive	3 point scale	NA	NA	NA	negative	simple mastectomy	NA	NA	NA	NA	NA	yes	21	3	NA	NA	-14906	0	0	NA	NA	NA	NA
TCGA-A7-A4SB-01A	a947a945-4721-45cc-bc45-13b8ea41c10e	a4sb	alive	0	418	NA	NA	NA	56	NA	NA	NA	NA	right upper outer quadrant	sentinel node biopsy alone	NA	NA	nationwide children's hospital	NA	NA	NA	tcga-a7-a4sb-f49625	df6ee235-5417-41d0-a77b-0237fc3ec31b	canonical	negative	positive	3 point scale	NA	3 point scale	other	positive	lumpectomy	right breast reexcision	NA	NA	NA	NA	yes	21	4	NA	NA	-20539	0	0	NA	NA	NA	NA
TCGA-A7-A4SC-01A	ec0ab947-9341-4fff-bda4-fdfb9434d508	a4sc	alive	0	446	NA	NA	NA	62	NA	NA	NA	NA	right upper outer quadrant	NA	NA	NA	nationwide children's hospital	NA	NA	germline comparison	tcga-a7-a4sc-f49714	e86bb295-deb8-4683-9676-d7244dfa8e00	canonical - plus	NA	positive	NA	NA	NA	NA	negative	simple mastectomy	NA	NA	NA	NA	NA	yes	21	8	NA	NA	-23008	0	0	NA	NA	NA	NA
TCGA-A7-A4SD-01A	8c09f413-e938-4f2e-a414-84f0e7fcfe41	a4sd	alive	0	441	NA	NA	NA	52	NA	NA	NA	NA	right	sentinel node biopsy alone	NA	NA	nationwide children's hospital	NA	NA	germline comparison	tcga-a7-a4sd-f52732	ddad5580-4821-46f0-9f96-9c8f4615a7df	canonical - plus	NA	negative	NA	NA	NA	NA	negative	simple mastectomy	NA	NA	NA	NA	NA	yes	21	5	NA	NA	-19131	0	0	NA	NA	NA	NA
TCGA-A7-A4SE-01A	dbf6f981-15cc-40ad-91ac-a66360405fbd	a4se	alive	0	644	NA	NA	NA	54	NA	NA	NA	NA	left	sentinel node biopsy alone	NA	NA	nationwide children's hospital	NA	NA	germline comparison	tcga-a7-a4se-f50162	ea17641d-048d-48c9-8c6f-24d1888e0196	canonical - plus	NA	negative	NA	NA	NA	NA	negative	lumpectomy	NA	NA	NA	NA	NA	yes	21	16	NA	NA	-20080	0	0	NA	NA	NA	NA
TCGA-A7-A4SF-01A	d81594d9-dd6a-45c3-8bad-61960611d78d	a4sf	alive	0	545	NA	NA	NA	54	NA	NA	NA	NA	right	sentinel node biopsy alone	NA	NA	nationwide children's hospital	NA	NA	NA	tcga-a7-a4sf-f49721	fbc837b9-2100-498a-9bb9-baefe1f2eeb5	canonical	positive	positive	3 point scale	NA	NA	other	negative	lumpectomy	right breast reexcision	NA	NA	NA	NA	yes	21	9	NA	NA	-19985	0	0	NA	NA	NA	NA
TCGA-A7-A56D-01A	f062cbd0-2426-40ac-a4be-e74ac61fa2a7	a56d	alive	0	448	NA	NA	NA	84	NA	NA	NA	NA	left lower inner quadrant	sentinel lymph node biopsy plus axillary dissection	NA	NA	nationwide children's hospital	NA	NA	germline comparison	tcga-a7-a56d-f50426	eef11dee-7878-4235-9b8c-e0f6b2bce27a	canonical - plus	NA	positive	3 point scale	1+	3 point scale	NA	positive	lumpectomy	NA	NA	NA	NA	NA	yes	21	23	NA	NA	-30783	0	0	NA	NA	NA	NA
TCGA-A7-A5ZV-01A	0ec70e40-07df-461d-8ff9-351240a0d454	a5zv	alive	0	368	NA	NA	NA	62	NA	NA	NA	NA	left	sentinel node biopsy alone	NA	NA	nationwide children's hospital	NA	NA	NA	tcga-a7-a5zv-f51143	135338be-7c95-4141-af1a-a7515a8e065d	canonical	NA	negative	NA	NA	NA	NA	negative	lumpectomy	NA	NA	NA	NA	NA	no	21	8	NA	NA	-22966	0	0	NA	NA	NA	NA
TCGA-A7-A5ZW-01A	523e24a2-51b9-4658-be2f-42e5fccebb17	a5zw	alive	0	326	NA	NA	NA	47	NA	NA	NA	NA	right upper outer quadrant	sentinel node biopsy alone	NA	NA	nationwide children's hospital	NA	NA	NA	tcga-a7-a5zw-f51509	99c27bed-2bf4-4438-bff1-18a08c754731	canonical	NA	positive	3 point scale	NA	3 point scale	NA	positive	lumpectomy	NA	NA	NA	NA	NA	no	21	19	NA	NA	-17529	0	0	NA	NA	NA	NA
TCGA-A7-A6VV-01A	57af5c72-0d60-4a6b-b1b4-ec6dab90f80f	a6vv	alive	0	313	NA	NA	NA	51	NA	NA	NA	NA	right	sentinel lymph node biopsy plus axillary dissection	NA	NA	nationwide children's hospital	NA	NA	NA	tcga-a7-a6vv-f57249	2a10e9c7-16b5-4cdc-8548-d21b927922ee	canonical	NA	negative	NA	NA	NA	NA	negative	modified radical mastectomy	NA	NA	NA	NA	NA	no	21	6	NA	NA	-18695	0	0	NA	NA	NA	NA
TCGA-A7-A6VW-01A	98e709e7-e195-4b37-9537-f6081affb609	a6vw	alive	0	285	NA	NA	NA	48	NA	NA	NA	NA	left	sentinel node biopsy alone	NA	NA	nationwide children's hospital	NA	NA	NA	tcga-a7-a6vw-f57227	4e6b8fb6-bafc-4287-bc6a-ab3ba00294c9	canonical	NA	negative	NA	NA	NA	NA	negative	lumpectomy	NA	NA	NA	NA	NA	no	21	6	NA	NA	-17539	0	0	NA	NA	NA	NA
TCGA-A7-A6VX-01A	7eea2b6e-771f-44c0-9350-38f45c8dbe87	a6vx	alive	0	317	NA	NA	NA	68	left upper outer quadrant	NA	NA	NA	left	sentinel node biopsy alone	NA	NA	nationwide children's hospital	NA	NA	NA	tcga-a7-a6vx-f57518	447123bc-55e4-401f-9f3e-452e63faed88	canonical	NA	positive	NA	NA	NA	NA	positive	lumpectomy	NA	NA	NA	NA	NA	no	21	13	NA	NA	-25066	0	0	NA	NA	NA	NA
TCGA-A7-A6VY-01A	e8ea576b-eb16-44f7-b241-daefc1375388	a6vy	alive	0	266	NA	NA	NA	48	right upper outer quadrant	NA	NA	NA	right	sentinel lymph node biopsy plus axillary dissection	NA	NA	nationwide children's hospital	NA	NA	NA	tcga-a7-a6vy-f57257	11d83905-3096-497d-a947-096697d1cd40	canonical	NA	negative	NA	NA	NA	NA	negative	lumpectomy	NA	NA	NA	NA	NA	no	21	6	NA	NA	-17640	0	0	NA	NA	NA	NA
TCGA-A8-A06N-01A	3a711140-1b89-4611-9992-3861e3d0e01a	a06n	alive	0	0	NA	NA	NA	66	NA	NA	NA	NA	left	NA	NA	NA	nationwide children's hospital	NA	NA	NA	NA	NA	canonical	NA	positive	NA	NA	NA	NA	negative	other	NA	NA	NA	NA	NA	NA	21	27	NA	NA	-24288	0	0	NA	NA	NA	NA
TCGA-A8-A06O-01A	69054195-9e93-49e5-b820-69b0091cc2d4	a06o	alive	0	396	NA	NA	NA	60	NA	NA	NA	NA	left	NA	NA	NA	nationwide children's hospital	NA	NA	NA	tcga-a8-a06o-f40806	9aaac44e-7751-40c8-84b7-d95b4899babf	canonical	NA	positive	NA	NA	NA	NA	positive	other	NA	NA	NA	NA	NA	NA	21	1	NA	NA	-22157	0	0	NA	NA	NA	NA
TCGA-A8-A06P-01A	5f90d955-bbb0-4b44-a5ac-ba6fda9ca0fb	a06p	alive	0	396	NA	NA	NA	63	NA	NA	NA	NA	right	NA	NA	NA	nationwide children's hospital	NA	NA	NA	tcga-a8-a06p-f40814	f2c11286-6956-4c14-9c00-ee235cf900a8	canonical	NA	positive	NA	NA	NA	NA	positive	other	NA	NA	NA	NA	NA	NA	21	2	NA	NA	-23011	0	0	NA	NA	NA	NA
TCGA-A8-A06Q-01A	281f70c5-876f-44b3-84fb-f2302f85e74c	a06q	alive	0	31	NA	NA	NA	63	NA	NA	NA	NA	left upper outer quadrant	NA	NA	NA	nationwide children's hospital	NA	NA	NA	NA	NA	canonical	NA	positive	NA	NA	NA	NA	positive	other	NA	NA	NA	NA	NA	NA	21	27	NA	NA	-23164	0	0	NA	NA	NA	NA
TCGA-A8-A06R-01A	f3ba71f9-25f3-4784-bf2d-3aa522a0cba8	a06r	alive	0	547	NA	NA	NA	69	NA	NA	NA	NA	right upper outer quadrant	NA	NA	NA	nationwide children's hospital	NA	NA	NA	tcga-a8-a06r-f40815	ab298bd7-3ca2-44b2-8fa0-1db436a3375f	canonical	NA	positive	NA	NA	NA	NA	negative	other	NA	NA	NA	NA	NA	NA	21	2	NA	NA	-25477	0	0	NA	NA	NA	NA
TCGA-A8-A06X-01A	70931617-b3df-4a12-8e3f-2b2307602f48	a06x	dead	943	943	NA	NA	NA	77	NA	NA	NA	NA	right upper outer quadrant	NA	NA	NA	nationwide children's hospital	NA	NA	NA	tcga-a8-a06x-f40818	1791687b-a509-4ca3-b10e-4edb80b779b6	canonical	NA	positive	NA	NA	NA	NA	negative	other	NA	NA	NA	NA	NA	NA	21	2	NA	NA	-28338	0	0	NA	NA	NA	NA
TCGA-A8-A06Y-01A	515b1400-e896-4f2a-81bd-70895441a0bd	a06y	alive	0	791	NA	NA	NA	66	NA	NA	NA	NA	left upper outer quadrant	NA	NA	NA	nationwide children's hospital	NA	NA	NA	tcga-a8-a06y-f40819	caefee71-9247-4aad-80da-82865d83ac02	canonical	NA	positive	NA	NA	NA	NA	positive	other	NA	NA	NA	NA	NA	NA	21	2	NA	NA	-24442	0	0	NA	NA	NA	NA
TCGA-A8-A06Z-01A	2399caeb-ead2-4003-af38-809db4ac2e2b	a06z	alive	0	31	NA	NA	NA	84	NA	NA	NA	NA	right upper outer quadrant	NA	NA	NA	nationwide children's hospital	NA	NA	NA	NA	NA	canonical	NA	positive	NA	NA	NA	NA	positive	other	NA	NA	NA	NA	NA	NA	21	27	NA	NA	-30984	0	0	NA	NA	NA	NA
TCGA-A8-A075-01A	7861a5f2-8910-4bcb-9c34-f79c5acd6e21	a075	alive	0	518	NA	NA	NA	42	NA	NA	NA	NA	left upper outer quadrant	NA	NA	NA	nationwide children's hospital	NA	NA	NA	tcga-a8-a075-f40820	030338fd-a8b6-40fa-b40c-d31ecb4b3cd2	canonical	NA	positive	NA	NA	NA	NA	positive	other	NA	NA	NA	NA	NA	NA	21	2	NA	NA	-15369	0	0	NA	NA	NA	NA
TCGA-A8-A076-01A	23dabeef-8e3c-44bc-9a12-a9522d17be5c	a076	alive	0	1642	NA	NA	NA	66	NA	NA	NA	NA	left upper outer quadrant	NA	NA	NA	nationwide children's hospital	NA	NA	NA	tcga-a8-a076-f40821	af505fdd-767f-4c9c-8bb2-2c2eb76fc975	canonical	NA	positive	NA	NA	NA	NA	positive	other	NA	NA	NA	NA	NA	NA	21	2	NA	NA	-24230	0	0	NA	NA	NA	NA
TCGA-A8-A079-01A	31c31cce-1b4d-4f12-922f-84f389403170	a079	alive	0	274	NA	NA	NA	69	NA	NA	NA	NA	left upper outer quadrant	NA	NA	NA	nationwide children's hospital	NA	NA	NA	tcga-a8-a079-f40822	5aff0910-3b7d-408f-a464-c3e105392a8c	canonical	NA	positive	NA	NA	NA	NA	positive	other	NA	NA	NA	NA	NA	NA	21	2	NA	NA	-25294	0	0	NA	NA	NA	NA
TCGA-A8-A07B-01A	b43e41af-1d82-4b5f-b8f1-add0510e6b86	a07b	alive	0	1308	NA	NA	NA	69	NA	NA	NA	NA	left lower outer quadrant	NA	NA	NA	nationwide children's hospital	NA	NA	NA	tcga-a8-a07b-f40823	4265c9da-22b4-4682-a01b-71d9e453cb98	canonical	NA	positive	NA	NA	NA	NA	positive	other	NA	NA	NA	NA	NA	NA	21	2	NA	NA	-25475	0	0	NA	NA	NA	NA
TCGA-A8-A07C-01A	b6633c36-7ce4-4b69-9bf6-30b64d46c66f	a07c	alive	0	1034	NA	NA	NA	57	NA	NA	NA	NA	right upper outer quadrant	NA	NA	NA	nationwide children's hospital	NA	NA	NA	tcga-a8-a07c-f40824	8090bedb-f551-48c4-81e1-f2bc695f9981	canonical	NA	negative	NA	NA	NA	NA	negative	other	NA	NA	NA	NA	NA	NA	21	2	NA	NA	-20820	0	0	NA	NA	NA	NA
TCGA-A8-A07F-01A	5d688049-f271-40ef-813a-d37240ffe21c	a07f	alive	0	577	NA	NA	NA	65	NA	NA	NA	NA	left upper outer quadrant	NA	NA	NA	nationwide children's hospital	NA	NA	NA	tcga-a8-a07f-f40826	820eefc0-3a02-4112-a50a-cc0abd447d83	canonical	NA	positive	NA	NA	NA	NA	positive	other	NA	NA	NA	NA	NA	NA	21	2	NA	NA	-23742	0	0	NA	NA	NA	NA
TCGA-A8-A07G-01A	8cf8b620-7ab6-4b6e-84bc-ff5a83f381fa	a07g	alive	0	577	NA	NA	NA	65	NA	NA	NA	NA	right upper outer quadrant	NA	NA	NA	nationwide children's hospital	NA	NA	NA	tcga-a8-a07g-f40827	11cba9e4-00d9-4227-964c-1681dbe988ed	canonical	NA	positive	NA	NA	NA	NA	positive	other	NA	NA	NA	NA	NA	NA	21	2	NA	NA	-23926	0	0	NA	NA	NA	NA
TCGA-A8-A07I-01A	566792ae-f853-4a47-856d-f02cdcfcb18a	a07i	alive	0	426	NA	NA	NA	69	NA	NA	NA	NA	left upper outer quadrant	NA	NA	NA	nationwide children's hospital	NA	NA	NA	tcga-a8-a07i-f40828	339036c6-8d30-466f-9cdd-9f7f28402c81	canonical	NA	positive	NA	NA	NA	NA	negative	other	NA	NA	NA	NA	NA	NA	21	2	NA	NA	-25263	0	0	NA	NA	NA	NA
TCGA-A8-A07J-01A	316625b8-a217-4829-90d1-dfd9cb7e4bc3	a07j	alive	0	365	NA	NA	NA	35	NA	NA	NA	NA	right upper outer quadrant	NA	NA	NA	nationwide children's hospital	NA	NA	NA	tcga-a8-a07j-f40829	17b903ff-a6d0-49cc-a697-c524de70e422	canonical	NA	positive	NA	NA	NA	NA	positive	other	NA	NA	NA	NA	NA	NA	21	2	NA	NA	-12965	0	0	NA	NA	NA	NA
TCGA-A8-A07L-01A	e89a9deb-6321-4e61-b412-b4993d4277dd	a07l	alive	0	975	NA	NA	NA	58	NA	NA	NA	NA	right upper outer quadrant	NA	NA	NA	nationwide children's hospital	NA	NA	NA	tcga-a8-a07l-f40830	e992c9f9-bf33-4063-a892-5ecd2958b1e6	canonical	NA	positive	NA	NA	NA	NA	positive	other	NA	NA	NA	NA	NA	NA	21	2	NA	NA	-21428	0	0	NA	NA	NA	NA
TCGA-A8-A07O-01A	cf9db1af-17f0-490e-8139-142bd704763a	a07o	alive	0	304	NA	NA	NA	51	NA	NA	NA	NA	right upper outer quadrant	NA	NA	NA	nationwide children's hospital	NA	NA	NA	tcga-a8-a07o-f40831	a8fc8b58-bd10-40c0-bee5-e0da7f4431c4	canonical	NA	negative	NA	NA	NA	NA	negative	other	NA	NA	NA	NA	NA	NA	21	2	NA	NA	-18870	0	0	NA	NA	NA	NA
TCGA-A8-A07P-01A	8cccf160-93e9-48a5-9b8b-54aa50153142	a07p	alive	0	334	NA	NA	NA	68	NA	NA	NA	NA	left upper outer quadrant	NA	NA	NA	nationwide children's hospital	NA	NA	NA	tcga-a8-a07p-f40832	b5b63f7a-129b-4bda-9d97-8f173a9a02da	canonical	NA	positive	NA	NA	NA	NA	positive	other	NA	NA	NA	NA	NA	NA	21	2	NA	NA	-24929	0	0	NA	NA	NA	NA
TCGA-A8-A07R-01A	72e486b8-a866-4916-b2e4-8b4bb5dcd92d	a07r	alive	0	273	NA	NA	NA	80	NA	NA	NA	NA	left upper outer quadrant	NA	NA	NA	nationwide children's hospital	NA	NA	NA	NA	NA	canonical	NA	negative	NA	NA	NA	NA	negative	other	NA	NA	NA	NA	NA	NA	21	11	NA	NA	-29251	0	0	NA	NA	NA	NA
TCGA-A8-A07S-01A	a20fa2c4-a502-47e3-bfaa-2ec4cce3a859	a07s	alive	0	243	NA	NA	NA	73	NA	NA	NA	NA	left upper outer quadrant	NA	NA	NA	nationwide children's hospital	NA	NA	NA	tcga-a8-a07s-f40833	78b6ad18-7dc4-47a4-908e-5490dae3a3b9	canonical	NA	positive	NA	NA	NA	NA	negative	other	NA	NA	NA	NA	NA	NA	21	2	NA	NA	-26998	0	0	NA	NA	NA	NA
TCGA-A8-A07U-01A	59bf0ce4-715a-4017-bccb-c59916e78324	a07u	alive	0	760	NA	NA	NA	66	NA	NA	NA	NA	right upper outer quadrant	NA	NA	NA	nationwide children's hospital	NA	NA	NA	tcga-a8-a07u-f40834	144df477-24e5-4990-931f-2038b033ab05	canonical	NA	negative	NA	NA	NA	NA	positive	other	NA	NA	NA	NA	NA	NA	21	2	NA	NA	-24411	0	0	NA	NA	NA	NA
TCGA-A8-A07W-01A	01263518-5f7c-49dc-8d7e-84b0c03a6a63	a07w	alive	0	304	NA	NA	NA	76	NA	NA	NA	NA	left upper outer quadrant	NA	NA	NA	nationwide children's hospital	NA	NA	NA	tcga-a8-a07w-f40835	4e5b10a4-29a2-4ab4-a3d4-1654295e7fdb	canonical	NA	positive	NA	NA	NA	NA	positive	other	NA	NA	NA	NA	NA	NA	21	2	NA	NA	-27942	0	0	NA	NA	NA	NA
TCGA-A8-A07Z-01A	a272171b-44f5-47a5-89be-7520413c01ad	a07z	alive	0	1371	NA	NA	NA	85	NA	NA	NA	NA	left	NA	NA	NA	nationwide children's hospital	NA	NA	NA	tcga-a8-a07z-f40836	517efc98-3027-495d-88b5-d50994a0f178	canonical	NA	positive	NA	NA	NA	NA	positive	other	NA	NA	NA	NA	NA	NA	21	2	NA	NA	-31351	0	0	NA	NA	NA	NA
TCGA-A8-A081-01A	9d876f05-5080-4c4e-9bf5-45f631d381e5	a081	alive	0	0	NA	NA	NA	80	NA	NA	NA	NA	right	NA	NA	NA	nationwide children's hospital	NA	NA	NA	NA	NA	canonical	NA	positive	NA	NA	NA	NA	positive	other	NA	NA	NA	NA	NA	NA	21	27	NA	NA	-29555	0	0	NA	NA	NA	NA
TCGA-A8-A082-01A	5e4187c9-98f8-4bdb-a8da-6a914e96f47a	a082	alive	0	549	NA	NA	NA	58	NA	NA	NA	NA	right	NA	NA	NA	nationwide children's hospital	NA	NA	NA	tcga-a8-a082-f40837	94671af3-7174-4e0b-9b56-33ffe891b86f	canonical	NA	positive	NA	NA	NA	NA	positive	other	NA	NA	NA	NA	NA	NA	21	2	NA	NA	-21338	0	0	NA	NA	NA	NA
TCGA-A8-A083-01A	afb9418e-91eb-4db1-aacf-12bd946c9ba0	a083	alive	0	0	NA	NA	NA	67	NA	NA	NA	NA	left	NA	NA	NA	nationwide children's hospital	NA	NA	NA	NA	NA	canonical	NA	positive	NA	NA	NA	NA	positive	other	NA	NA	NA	NA	NA	NA	21	27	NA	NA	-24746	0	0	NA	NA	NA	NA
TCGA-A8-A085-01A	3c08aabd-d5b5-4bbe-857c-38a7527b2163	a085	alive	0	1124	NA	NA	NA	44	NA	NA	NA	NA	left	NA	NA	NA	nationwide children's hospital	NA	NA	NA	tcga-a8-a085-f40839	9130cb27-2e3c-4e79-b685-4c2367adfd41	canonical	NA	positive	NA	NA	NA	NA	positive	other	NA	NA	NA	NA	NA	NA	21	2	NA	NA	-16377	0	0	NA	NA	NA	NA
TCGA-A8-A086-01A	f9eb88f7-9293-46bf-ace4-a746e4ff80dc	a086	alive	0	396	NA	NA	NA	59	NA	NA	NA	NA	right	NA	NA	NA	nationwide children's hospital	NA	NA	NA	tcga-a8-a086-f40840	eb8f9f5c-fc49-4db0-95b6-f2fc583de891	canonical	NA	positive	NA	NA	NA	NA	positive	other	NA	NA	NA	NA	NA	NA	21	2	NA	NA	-21731	0	0	NA	NA	NA	NA
TCGA-A8-A08A-01A	7fe4670d-4626-459d-869b-ab15f478c6a7	a08a	alive	0	30	NA	NA	NA	89	NA	NA	NA	NA	left upper inner quadrant	NA	NA	NA	nationwide children's hospital	NA	NA	NA	NA	NA	canonical	NA	positive	NA	NA	NA	NA	positive	other	NA	NA	NA	NA	NA	NA	21	27	NA	NA	-32750	0	0	NA	NA	NA	NA
TCGA-A8-A08B-01A	d8d7a6c2-6427-4f47-968c-6c3affba4617	a08b	alive	0	1156	NA	NA	NA	52	NA	NA	NA	NA	right upper inner quadrant	NA	NA	NA	nationwide children's hospital	NA	NA	NA	tcga-a8-a08b-f40841	b37e2409-548d-421a-a840-34803c923738	canonical	NA	positive	NA	NA	NA	NA	negative	other	NA	NA	NA	NA	NA	NA	21	2	NA	NA	-19114	0	0	NA	NA	NA	NA
TCGA-A8-A08C-01A	78e1da41-127c-4e9c-aaaa-77a0d94c31d0	a08c	alive	0	881	NA	NA	NA	65	NA	NA	NA	NA	left upper inner quadrant	NA	NA	NA	nationwide children's hospital	NA	NA	NA	tcga-a8-a08c-f40842	ee8a8bcf-c75e-4e24-9da3-1cd8dfa9b713	canonical	NA	positive	NA	NA	NA	NA	positive	other	NA	NA	NA	NA	NA	NA	21	2	NA	NA	-24017	0	0	NA	NA	NA	NA
TCGA-A8-A08G-01A	719082cc-1ebe-4a51-a659-85a59db1d77d	a08g	alive	0	607	NA	NA	NA	41	NA	NA	NA	NA	left upper inner quadrant	NA	NA	NA	nationwide children's hospital	NA	NA	NA	tcga-a8-a08g-f40844	2e2652a5-951a-4b3b-af47-55ec819c68f2	canonical	NA	positive	NA	NA	NA	NA	positive	other	NA	NA	NA	NA	NA	NA	21	2	NA	NA	-14976	0	0	NA	NA	NA	NA
TCGA-A8-A08H-01A	db8d38ab-cc61-49ee-863d-40060112f2af	a08h	alive	0	0	NA	NA	NA	66	NA	NA	NA	NA	left upper inner quadrant	NA	NA	NA	nationwide children's hospital	NA	NA	NA	NA	NA	canonical	NA	positive	NA	NA	NA	NA	positive	other	NA	NA	NA	NA	NA	NA	21	27	NA	NA	-24137	0	0	NA	NA	NA	NA
TCGA-A8-A08I-01A	7acf33e7-c386-45fd-8c9a-469600378687	a08i	alive	0	365	NA	NA	NA	53	NA	NA	NA	NA	right upper inner quadrant	NA	NA	NA	nationwide children's hospital	NA	NA	NA	tcga-a8-a08i-f40845	98d30323-480e-40b0-825c-3ea0c137401c	canonical	NA	positive	NA	NA	NA	NA	positive	other	NA	NA	NA	NA	NA	NA	21	2	NA	NA	-19389	0	0	NA	NA	NA	NA
TCGA-A8-A08J-01A	68177e92-4784-45d9-af14-4ce0c00eae74	a08j	dead	1127	1127	NA	NA	NA	52	NA	NA	NA	NA	right	NA	NA	NA	nationwide children's hospital	NA	NA	NA	tcga-a8-a08j-f40846	511a5351-b4ec-4b3f-8f4e-00afd1613ed1	canonical	NA	positive	NA	NA	NA	NA	negative	other	NA	NA	NA	NA	NA	NA	21	2	NA	NA	-19266	0	0	NA	NA	NA	NA
TCGA-A8-A08L-01A	8bd68696-5eeb-46d7-9dc6-c39c849029a4	a08l	dead	304	304	NA	NA	NA	89	NA	NA	NA	NA	left	NA	NA	NA	nationwide children's hospital	NA	NA	NA	tcga-a8-a08l-f40847	621db5e5-f1f5-43b1-8d8c-45a3e8c58eec	canonical	NA	positive	NA	NA	NA	NA	negative	other	NA	NA	NA	NA	NA	NA	21	2	NA	NA	-32842	0	0	NA	NA	NA	NA
TCGA-A8-A08O-01A	5f5964a8-8e07-4620-98f0-93d162dbc31e	a08o	alive	0	943	NA	NA	NA	45	NA	NA	NA	NA	right	NA	NA	NA	nationwide children's hospital	NA	NA	NA	tcga-a8-a08o-f40848	a5b49570-aa8e-44e1-9b60-ef845affdc60	canonical	NA	positive	NA	NA	NA	NA	positive	other	NA	NA	NA	NA	NA	NA	21	2	NA	NA	-16681	0	0	NA	NA	NA	NA
TCGA-A8-A08P-01A	f947d67f-4aa2-4eb9-977e-21a5ae563613	a08p	alive	0	943	NA	NA	NA	70	NA	NA	NA	NA	right	NA	NA	NA	nationwide children's hospital	NA	NA	NA	tcga-a8-a08p-f40561	5ac6be92-4c93-419d-a6b8-65c8b218b5d4	canonical	NA	positive	NA	NA	NA	NA	positive	other	NA	NA	NA	NA	NA	NA	21	24	NA	NA	-25598	0	0	NA	NA	NA	NA
TCGA-A8-A08R-01A	6412854a-f874-469e-9d1f-8bd3ae5bd41d	a08r	alive	0	30	NA	NA	NA	52	NA	NA	NA	NA	left	NA	NA	NA	nationwide children's hospital	NA	NA	NA	NA	NA	canonical	NA	negative	NA	NA	NA	NA	negative	other	NA	NA	NA	NA	NA	NA	21	27	NA	NA	-19298	0	0	NA	NA	NA	NA
TCGA-A8-A08T-01A	32bc7cc4-d185-4594-bbee-4b96410be512	a08t	dead	3409	3409	NA	NA	NA	64	NA	NA	NA	NA	right	NA	NA	NA	nationwide children's hospital	NA	NA	NA	tcga-a8-a08t-f40559	643ed7a2-6ea2-4e09-a96e-6c6d54cfbef0	canonical	NA	positive	NA	NA	NA	NA	positive	other	NA	NA	NA	NA	NA	NA	21	24	NA	NA	-23560	0	0	NA	NA	NA	NA
TCGA-A8-A08X-01A	f5539207-6534-4edc-a5a5-7666b5d16ba4	a08x	alive	0	1308	NA	NA	NA	43	NA	NA	NA	NA	left	NA	NA	NA	nationwide children's hospital	NA	NA	NA	tcga-a8-a08x-f40558	84ae03e2-883c-4c00-840d-acbade8ecee0	canonical	NA	negative	NA	NA	NA	NA	negative	other	NA	NA	NA	NA	NA	NA	21	24	NA	NA	-15705	0	0	NA	NA	NA	NA
TCGA-A8-A08Z-01A	d7808cbc-4b8c-467b-b2c3-f48d05b9ecab	a08z	alive	0	1217	NA	NA	NA	76	NA	NA	NA	NA	left	NA	NA	NA	nationwide children's hospital	NA	NA	NA	NA	NA	canonical	NA	positive	NA	NA	NA	NA	positive	other	NA	NA	NA	NA	NA	NA	21	27	NA	NA	-28003	0	0	NA	NA	NA	NA
TCGA-A8-A090-01A	f4b69043-4a67-48e3-a4d1-72a21ae2d175	a090	alive	0	0	NA	NA	NA	74	NA	NA	NA	NA	right	NA	NA	NA	nationwide children's hospital	NA	NA	NA	NA	NA	canonical	NA	positive	NA	NA	NA	NA	positive	other	NA	NA	NA	NA	NA	NA	21	27	NA	NA	-27121	0	0	NA	NA	NA	NA
TCGA-A8-A092-01A	38a8b734-9acc-42f9-b5b7-e51b0dfc6504	a092	alive	0	942	NA	NA	NA	48	NA	NA	NA	NA	left	NA	NA	NA	nationwide children's hospital	NA	NA	NA	tcga-a8-a092-f40556	08bbc200-9e93-4fc1-8382-1cbf2310477f	canonical	NA	positive	NA	NA	NA	NA	positive	other	NA	NA	NA	NA	NA	NA	21	23	NA	NA	-17807	0	0	NA	NA	NA	NA
TCGA-A8-A094-01A	993103b1-e5a1-4c33-8629-be53ebc41d64	a094	alive	0	0	NA	NA	NA	75	NA	NA	NA	NA	left	NA	NA	NA	nationwide children's hospital	NA	NA	NA	NA	NA	canonical	NA	positive	NA	NA	NA	NA	negative	other	NA	NA	NA	NA	NA	NA	21	27	NA	NA	-27729	0	0	NA	NA	NA	NA
TCGA-A8-A095-01A	29df128d-ace2-40cf-88ee-3f6f2170f159	a095	alive	0	1277	NA	NA	NA	45	NA	NA	NA	NA	left	NA	NA	NA	nationwide children's hospital	NA	NA	NA	tcga-a8-a095-f40554	6cce328f-29a6-4589-b6c4-32fbe8eba27e	canonical	NA	positive	NA	NA	NA	NA	positive	other	NA	NA	NA	NA	NA	NA	21	23	NA	NA	-16742	0	0	NA	NA	NA	NA
TCGA-A8-A096-01A	d7cac141-9269-4733-83ce-e1bc0b503254	a096	alive	0	0	NA	NA	NA	73	NA	NA	NA	NA	right	NA	NA	NA	nationwide children's hospital	NA	NA	NA	NA	NA	canonical	NA	positive	NA	NA	NA	NA	positive	other	NA	NA	NA	NA	NA	NA	21	27	NA	NA	-26723	0	0	NA	NA	NA	NA
TCGA-A8-A097-01A	dcfd0b1d-5707-44a6-b225-5e8f7cea5ca1	a097	alive	0	365	NA	NA	NA	65	NA	NA	NA	NA	left	NA	NA	NA	nationwide children's hospital	NA	NA	NA	tcga-a8-a097-f40553	e01ada75-ea29-473e-8f48-7e4b21f2d04c	canonical	NA	positive	NA	NA	NA	NA	positive	other	NA	NA	NA	NA	NA	NA	21	23	NA	NA	-23741	0	0	NA	NA	NA	NA
TCGA-A8-A099-01A	e98b69bc-766a-485f-b5e8-9166b8d457b3	a099	alive	0	304	NA	NA	NA	76	NA	NA	NA	NA	right	NA	NA	NA	nationwide children's hospital	NA	NA	NA	tcga-a8-a099-f40552	b6f0ccab-a857-4381-8721-9d235581ada6	canonical	NA	positive	NA	NA	NA	NA	positive	other	NA	NA	NA	NA	NA	NA	21	23	NA	NA	-28063	0	0	NA	NA	NA	NA
TCGA-A8-A09A-01A	b205bba0-1870-4458-9088-8817e20389fe	a09a	alive	0	304	NA	NA	NA	40	NA	NA	NA	NA	left	NA	NA	NA	nationwide children's hospital	NA	NA	NA	tcga-a8-a09a-f40551	6d20ef32-98f7-497a-b6e9-a40607ff1ff7	canonical	NA	positive	NA	NA	NA	NA	positive	other	NA	NA	NA	NA	NA	NA	21	23	NA	NA	-14883	0	0	NA	NA	NA	NA
TCGA-A8-A09B-01A	3828b534-908e-4953-a3fb-07d01cf49c7d	a09b	alive	0	365	NA	NA	NA	58	NA	NA	NA	NA	left	NA	NA	NA	nationwide children's hospital	NA	NA	NA	tcga-a8-a09b-f40550	67b93484-7627-4eb4-82e5-189b57d36ac1	canonical	NA	positive	NA	NA	NA	NA	positive	other	NA	NA	NA	NA	NA	NA	21	23	NA	NA	-21520	0	0	NA	NA	NA	NA
TCGA-A8-A09D-01A	36449392-de76-4ee9-bc09-627a07e18727	a09d	alive	0	1522	NA	NA	NA	47	NA	NA	NA	NA	right lower outer quadrant	NA	NA	NA	nationwide children's hospital	NA	NA	NA	tcga-a8-a09d-f40549	a2b31f29-0e1f-4f7f-b705-1b6f0312a9f4	canonical	NA	positive	NA	NA	NA	NA	positive	other	NA	NA	NA	NA	NA	NA	21	23	NA	NA	-17440	0	0	NA	NA	NA	NA
TCGA-A8-A09G-01A	3927f736-3b5c-48c8-9d9e-83669ec44770	a09g	alive	0	0	NA	NA	NA	79	NA	NA	NA	NA	right lower outer quadrant	NA	NA	NA	nationwide children's hospital	NA	NA	NA	NA	NA	canonical	NA	positive	NA	NA	NA	NA	negative	other	NA	NA	NA	NA	NA	NA	21	27	NA	NA	-29006	0	0	NA	NA	NA	NA
TCGA-A8-A09M-01A	626b4ff0-2188-4a14-aac8-6703c624917f	a09m	alive	0	1006	NA	NA	NA	75	NA	NA	NA	NA	right lower outer quadrant	NA	NA	NA	nationwide children's hospital	NA	NA	NA	tcga-a8-a09m-f40331	6b25050a-f752-4fed-a111-e3d271b3bd15	canonical	NA	positive	NA	NA	NA	NA	positive	other	NA	NA	NA	NA	NA	NA	21	17	NA	NA	-27455	0	0	NA	NA	NA	NA
TCGA-A8-A09N-01A	33919e92-4ea9-47e5-a6f4-36e51845d50f	a09n	alive	0	31	NA	NA	NA	57	NA	NA	NA	NA	right lower outer quadrant	NA	NA	NA	nationwide children's hospital	NA	NA	NA	NA	NA	canonical	NA	positive	NA	NA	NA	NA	positive	other	NA	NA	NA	NA	NA	NA	21	27	NA	NA	-21002	0	0	NA	NA	NA	NA
TCGA-A8-A09Q-01A	09c2bc35-c21f-4aa4-ac30-0d8db02ad811	a09q	alive	0	761	NA	NA	NA	83	NA	NA	NA	NA	left lower inner quadrant	NA	NA	NA	nationwide children's hospital	NA	NA	NA	tcga-a8-a09q-f41022	4b42d5b1-911a-4c69-9e7e-c9578a82ab6b	canonical	NA	positive	NA	NA	NA	NA	positive	other	NA	NA	NA	NA	NA	NA	21	10	NA	NA	-30528	0	0	NA	NA	NA	NA
TCGA-A8-A09R-01A	cb0a2055-2168-4454-8755-47dd613db36f	a09r	alive	0	273	NA	NA	NA	82	NA	NA	NA	NA	left lower inner quadrant	NA	NA	NA	nationwide children's hospital	NA	NA	NA	tcga-a8-a09r-f40330	d44cd2fc-8e35-4fe5-94b7-1cf7c6bc3741	canonical	NA	positive	NA	NA	NA	NA	positive	other	NA	NA	NA	NA	NA	NA	21	17	NA	NA	-30196	0	0	NA	NA	NA	NA
TCGA-A8-A09T-01A	0adf59c6-581a-475d-a2f4-40aa40060b5b	a09t	alive	0	579	NA	NA	NA	68	NA	NA	NA	NA	left	NA	NA	NA	nationwide children's hospital	NA	NA	NA	tcga-a8-a09t-f40329	c0db6775-bc42-4631-9aad-006977242b0e	canonical	NA	positive	NA	NA	NA	NA	positive	other	NA	NA	NA	NA	NA	NA	21	17	NA	NA	-25110	0	0	NA	NA	NA	NA
TCGA-A8-A09V-01A	cc348a26-ee11-47a4-8b51-de922967e175	a09v	alive	0	457	NA	NA	NA	51	NA	NA	NA	NA	right upper inner quadrant	NA	NA	NA	nationwide children's hospital	NA	NA	NA	tcga-a8-a09v-f40328	0021ab34-8c5f-451e-8b64-df949cb50034	canonical	NA	positive	NA	NA	NA	NA	positive	other	NA	NA	NA	NA	NA	NA	21	17	NA	NA	-18628	0	0	NA	NA	NA	NA
TCGA-A8-A09W-01A	452672e8-b6d9-45b5-bb02-e88e03e2dd66	a09w	alive	0	30	NA	NA	NA	70	NA	NA	NA	NA	right upper inner quadrant	NA	NA	NA	nationwide children's hospital	NA	NA	NA	NA	NA	canonical	NA	positive	NA	NA	NA	NA	positive	other	NA	NA	NA	NA	NA	NA	21	27	NA	NA	-25659	0	0	NA	NA	NA	NA
TCGA-A8-A09X-01A	27b05b15-a44b-45ed-a6e3-e7d1ca488ea9	a09x	dead	426	426	NA	NA	NA	62	NA	NA	NA	NA	left upper inner quadrant	NA	NA	NA	nationwide children's hospital	NA	NA	NA	NA	NA	canonical	NA	negative	NA	NA	NA	NA	negative	other	NA	NA	NA	NA	NA	NA	21	27	NA	NA	-22858	0	0	NA	NA	NA	NA
TCGA-A8-A09Z-01A	81e7a3d3-be70-4834-8018-4d2cc077a4e6	a09z	alive	0	0	NA	NA	NA	83	NA	NA	NA	NA	right	NA	NA	NA	nationwide children's hospital	NA	NA	NA	NA	NA	canonical	NA	positive	NA	NA	NA	NA	negative	other	NA	NA	NA	NA	NA	NA	21	27	NA	NA	-30590	0	0	NA	NA	NA	NA
TCGA-A8-A0A1-01A	3efa245d-177d-4ef9-94f7-f554c54e345e	a0a1	alive	0	365	NA	NA	NA	84	NA	NA	NA	NA	right	NA	NA	NA	nationwide children's hospital	NA	NA	NA	NA	NA	canonical	NA	positive	NA	NA	NA	NA	positive	other	NA	NA	NA	NA	NA	NA	21	6	NA	NA	-30742	0	0	NA	NA	NA	NA
TCGA-A8-A0A2-01A	34d5a193-85e5-4399-8a9b-e92858eafdfe	a0a2	alive	0	579	NA	NA	NA	66	NA	NA	NA	NA	right lower outer quadrant	NA	NA	NA	nationwide children's hospital	NA	NA	NA	NA	NA	canonical	NA	positive	NA	NA	NA	NA	positive	other	NA	NA	NA	NA	NA	NA	21	11	NA	NA	-24380	0	0	NA	NA	NA	NA
TCGA-A8-A0A4-01A	2cb8c866-9296-4c70-a3ea-f9a9b707895c	a0a4	alive	0	396	NA	NA	NA	73	NA	NA	NA	NA	left	NA	NA	NA	nationwide children's hospital	NA	NA	NA	tcga-a8-a0a4-f40326	be77f294-fae5-4040-a6ea-671c8915b7f9	canonical	NA	positive	NA	NA	NA	NA	positive	other	NA	NA	NA	NA	NA	NA	21	16	NA	NA	-26693	0	0	NA	NA	NA	NA
TCGA-A8-A0A6-01A	4b0d295c-e185-4b52-9752-178e5bc1d47d	a0a6	alive	0	640	NA	NA	NA	64	NA	NA	NA	NA	left upper outer quadrant	NA	NA	NA	nationwide children's hospital	NA	NA	NA	tcga-a8-a0a6-f40325	63860c23-6640-45e1-b9c8-1e420148833d	canonical	NA	positive	NA	NA	NA	NA	positive	other	NA	NA	NA	NA	NA	NA	21	16	NA	NA	-23404	0	0	NA	NA	NA	NA
TCGA-A8-A0A7-01A	995fdab7-7284-4d33-befa-ec22aa7c6479	a0a7	alive	0	30	NA	NA	NA	57	NA	NA	NA	NA	right upper outer quadrant	NA	NA	NA	nationwide children's hospital	NA	NA	NA	NA	NA	canonical	NA	negative	NA	NA	NA	NA	negative	other	NA	NA	NA	NA	NA	NA	21	27	NA	NA	-20940	0	0	NA	NA	NA	NA
TCGA-A8-A0A9-01A	7b605fb6-d077-401e-b870-b87ddf505f82	a0a9	alive	0	822	NA	NA	NA	80	NA	NA	NA	NA	left upper outer quadrant	NA	NA	NA	nationwide children's hospital	NA	NA	NA	tcga-a8-a0a9-f40323	2268a2c4-38e4-4eaa-ae4d-4454ed86bb07	canonical	NA	positive	NA	NA	NA	NA	positive	other	NA	NA	NA	NA	NA	NA	21	16	NA	NA	-29370	0	0	NA	NA	NA	NA
TCGA-A8-A0AB-01A	22eaba28-be67-4730-9846-860bc1fca29a	a0ab	alive	0	518	NA	NA	NA	54	NA	NA	NA	NA	left upper outer quadrant	NA	NA	NA	nationwide children's hospital	NA	NA	NA	tcga-a8-a0ab-f40322	8a60e4e1-747f-4974-9159-ca9beaa7e445	canonical	NA	positive	NA	NA	NA	NA	positive	other	NA	NA	NA	NA	NA	NA	21	16	NA	NA	-19814	0	0	NA	NA	NA	NA
TCGA-A8-A0AD-01A	af5453a9-cf1f-40de-aec4-0e0710908fb7	a0ad	alive	0	1157	NA	NA	NA	83	NA	NA	NA	NA	right upper outer quadrant	NA	NA	NA	nationwide children's hospital	NA	NA	NA	tcga-a8-a0ad-f40321	aa110d07-3b8d-423a-8609-0393506bec0a	canonical	NA	positive	NA	NA	NA	NA	positive	other	NA	NA	NA	NA	NA	NA	21	16	NA	NA	-30407	0	0	NA	NA	NA	NA
TCGA-AC-A23C-01A	dfd0b7ba-c7d3-498e-b455-346301865452	a23c	alive	0	585	NA	NA	NA	62	NA	NA	NA	NA	left	NA	NA	NA	nationwide children's hospital	NA	NA	NA	tcga-ac-a23c-f43235	37e3974f-7a96-4cfc-b4df-d9c320c34423	canonical	NA	positive	NA	NA	NA	NA	positive	modified radical mastectomy	NA	NA	NA	NA	NA	NA	21	15	NA	NA	-22751	0	0	NA	NA	no	NA
TCGA-AC-A23E-01A	e7bae6e7-f779-449d-92b9-66996041e00d	a23e	alive	0	698	NA	NA	NA	50	NA	NA	NA	NA	right	sentinel node biopsy alone	NA	NA	nationwide children's hospital	NA	NA	NA	tcga-ac-a23e-f43240	6b8cd25f-d9f0-46c3-aa28-66d68a889f91	canonical	NA	positive	NA	NA	NA	NA	positive	modified radical mastectomy	NA	NA	NA	NA	NA	NA	21	15	NA	NA	-18500	0	0	NA	NA	no	NA
TCGA-AC-A23G-01A	a721dac6-0126-476c-b2d4-2dbf7406454b	a23g	alive	0	2248	NA	NA	NA	76	NA	NA	NA	NA	right upper inner quadrant	NA	NA	NA	nationwide children's hospital	NA	NA	NA	tcga-ac-a23g-f43241	cbabbd3d-7093-4cb3-9f87-a561f537c731	canonical	NA	positive	NA	NA	NA	NA	positive	other	NA	NA	NA	NA	NA	NA	21	15	NA	NA	-27934	0	0	NA	NA	no	NA
TCGA-AC-A23H-01A	7dcf550c-90ce-4f63-aecd-0e46897e2a3e	a23h	dead	174	174	NA	NA	NA	90	right lower inner quadrant	NA	NA	NA	right upper inner quadrant	NA	NA	NA	nationwide children's hospital	case matched methylation control	NA	case matched expression control	tcga-ac-a23h-f45572	9e725427-00de-4c87-adee-5b6a3ec1902c	canonical - plus	NA	positive	NA	NA	NA	NA	negative	simple mastectomy	NA	NA	NA	NA	NA	NA	21	17	NA	NA	-32873	0	0	NA	NA	no	NA
TCGA-AC-A2B8-01A	6e126b73-d3e8-4641-a128-306f3b313e40	a2b8	alive	0	677	NA	NA	NA	84	NA	NA	NA	NA	right	axillary lymph node dissection alone	NA	NA	nationwide children's hospital	NA	NA	NA	tcga-ac-a2b8-f43210	e01d57eb-5162-4bce-8ac8-d37ddbe74b3c	canonical	NA	positive	NA	NA	NA	NA	positive	simple mastectomy	NA	NA	NA	NA	NA	NA	21	15	NA	NA	-31003	0	0	NA	NA	no	NA
TCGA-AC-A2BK-01A	6fa2a667-9c36-4526-8a58-1975e863a806	a2bk	alive	0	2222	NA	NA	NA	78	NA	NA	NA	NA	left upper outer quadrant	axillary lymph node dissection alone	NA	NA	nationwide children's hospital	NA	NA	NA	tcga-ac-a2bk-f43987	256ce2cd-be4c-49cd-8395-1a4991708d69	canonical	NA	negative	NA	NA	NA	NA	negative	modified radical mastectomy	NA	NA	NA	NA	NA	no	21	10	NA	NA	-28625	0	0	NA	NA	no	NA
TCGA-AC-A2BM-01A	8159ff7b-89f4-411a-9b9c-491f1cb3eb34	a2bm	alive	0	3022	NA	NA	NA	41	NA	NA	NA	NA	left upper inner quadrant	sentinel lymph node biopsy plus axillary dissection	NA	NA	nationwide children's hospital	NA	NA	NA	tcga-ac-a2bm-f66202	dd44274c-674f-4906-827e-1411f9f99094	canonical	NA	positive	NA	NA	NA	NA	positive	modified radical mastectomy	NA	NA	NA	NA	NA	yes	21	3	NA	NA	-15212	0	0	NA	NA	no	NA
TCGA-AC-A2FB-01A	02bbb632-0f7f-439d-b8f0-c86a06237424	a2fb	alive	0	1234	NA	NA	NA	65	NA	NA	NA	NA	left upper inner quadrant	sentinel node biopsy alone	NA	NA	nationwide children's hospital	case matched methylation control	NA	case matched expression control	tcga-ac-a2fb-f45574	64865afc-b952-4d29-aea3-bf902b430461	canonical - plus	NA	positive	3 point scale	3+	3 point scale	NA	positive	simple mastectomy	NA	NA	NA	NA	NA	no	21	17	NA	NA	-23851	0	0	NA	NA	no	NA
TCGA-AC-A2FE-01A	f6eebd4b-b63a-4a9c-92d3-0d954a8a6655	a2fe	dead	2636	2636	NA	NA	NA	62	NA	NA	NA	NA	right upper outer quadrant	sentinel lymph node biopsy plus axillary dissection	NA	NA	nationwide children's hospital	NA	NA	NA	tcga-ac-a2fe-f47725	19ec4e99-4ad7-41c8-a15c-7b826c486a39	canonical	NA	positive	NA	NA	NA	NA	positive	modified radical mastectomy	NA	NA	NA	NA	NA	no	21	28	NA	NA	-22746	0	0	NA	NA	NA	NA
TCGA-AC-A2FF-01A	3ca67cd0-81da-4f68-a9fa-f1a8c013c28d	a2ff	alive	0	2759	NA	NA	NA	40	NA	NA	NA	NA	right	sentinel lymph node biopsy plus axillary dissection	NA	NA	nationwide children's hospital	case matched methylation control	NA	case matched expression control	tcga-ac-a2ff-f58655	44be030f-e207-4d98-80c9-f9f658c96ae7	canonical - plus	NA	positive	NA	NA	NA	NA	positive	lumpectomy	NA	NA	NA	NA	NA	yes	21	17	NA	NA	NA	0	0	NA	NA	no	NA
TCGA-AC-A2FG-01A	39cda4c9-e1c8-44c2-bab7-f5849c12f879	a2fg	alive	0	1853	NA	NA	NA	79	NA	NA	NA	NA	left upper outer quadrant	sentinel lymph node biopsy plus axillary dissection	NA	NA	nationwide children's hospital	NA	NA	case matched methylation control	tcga-ac-a2fg-f43221	06360a31-72be-4b48-bc93-870ceb0e9bed	canonical - plus	NA	positive	NA	NA	NA	NA	negative	modified radical mastectomy	NA	NA	NA	NA	NA	yes	21	15	NA	NA	-29211	0	0	NA	NA	no	NA
TCGA-AC-A2FK-01A	79126e88-9cf8-45ff-bf91-a98da3b304d7	a2fk	alive	0	2650	NA	NA	NA	45	NA	NA	NA	NA	left upper outer quadrant	NA	NA	NA	nationwide children's hospital	NA	NA	NA	tcga-ac-a2fk-f66196	dd3ab466-3c36-42bb-8f4a-e288ed7c6078	canonical	NA	positive	NA	NA	NA	NA	positive	modified radical mastectomy	NA	NA	NA	NA	NA	NA	21	3	NA	NA	-16627	0	0	NA	NA	no	NA
TCGA-AC-A2FM-01A	b6b1dc9a-91f4-4b0a-afd5-62c9a90c0d5e	a2fm	dead	792	792	NA	NA	NA	87	NA	NA	NA	NA	right upper inner quadrant	sentinel node biopsy alone	NA	NA	nationwide children's hospital	case matched methylation control	NA	case matched expression control	tcga-ac-a2fm-f43237	b54c9682-b927-4790-a081-623844557f09	canonical - plus	NA	NA	NA	NA	NA	NA	NA	modified radical mastectomy	NA	NA	NA	NA	NA	yes	21	15	NA	NA	-31805	0	0	NA	NA	yes	NA
TCGA-AC-A2FO-01A	f5d4c2d3-cc69-4b38-8551-0917e3622a68	a2fo	alive	0	2255	NA	NA	NA	65	NA	NA	NA	NA	left upper outer quadrant	other (specify)	sentinel lymph node plus level i and level ii lymph nodes	NA	nationwide children's hospital	NA	NA	NA	tcga-ac-a2fo-f43223	ef71a0d0-16ab-45a4-a42d-625afef971b8	canonical	NA	positive	NA	NA	NA	NA	negative	simple mastectomy	NA	NA	NA	NA	NA	no	21	15	NA	NA	-23928	0	0	NA	NA	no	NA
TCGA-AC-A2QH-01A	67c5f371-3fa9-47c5-8b15-c2dd9acc8519	a2qh	alive	0	1005	NA	NA	NA	58	NA	NA	NA	NA	right upper outer quadrant	axillary lymph node dissection alone	NA	NA	nationwide children's hospital	NA	NA	ffpe validation	tcga-ac-a2qh-f64100	91e76ef9-3b27-4249-8f36-04c648deaa31	canonical - plus	NA	negative	NA	NA	NA	NA	negative	modified radical mastectomy	NA	NA	NA	NA	NA	yes	21	26	NA	NA	-21488	0	0	NA	NA	no	NA
TCGA-AC-A2QI-01A	c57835be-77ab-4cf5-9b23-62c11a7b2eaf	a2qi	alive	0	588	NA	NA	NA	76	NA	NA	NA	NA	right	sentinel node biopsy alone	NA	NA	nationwide children's hospital	NA	NA	NA	tcga-ac-a2qi-f57047	6aa0381b-1a09-4e7e-a968-8065c44eb313	canonical	NA	positive	NA	NA	NA	NA	negative	other	NA	NA	NA	NA	NA	NA	21	28	NA	NA	-27865	0	0	NA	NA	no	NA
TCGA-AC-A2QJ-01A	d9fd2724-7db0-4af3-ac14-217bdfa5203f	a2qj	dead	446	446	NA	NA	NA	48	left lower outer quadrant	NA	NA	NA	left upper outer quadrant	other (specify)	sentinel lymph node and axillary lymph node biopsy	NA	nationwide children's hospital	NA	NA	NA	tcga-ac-a2qj-f44021	3a8d4436-79f0-4371-8e16-9abb1ec95eca	canonical	NA	negative	NA	NA	NA	NA	negative	other	NA	NA	NA	NA	NA	no	21	28	NA	NA	-17569	0	0	NA	NA	no	NA
TCGA-AC-A3BB-01A	048549cf-d0a5-4743-a0a1-2004f7cc2b08	a3bb	alive	0	987	NA	NA	NA	46	NA	NA	NA	NA	right upper outer quadrant	axillary lymph node dissection alone	NA	NA	nationwide children's hospital	NA	NA	NA	tcga-ac-a3bb-f58953	4140d0ae-c992-47b8-bb8c-23a0f298c461	canonical	NA	positive	NA	NA	NA	NA	positive	modified radical mastectomy	NA	NA	NA	NA	NA	NA	21	29	NA	NA	-16983	0	0	NA	NA	no	NA
TCGA-AC-A3EH-01A	fac173a8-1613-4bd4-87ba-83a2cfe8a37d	a3eh	dead	197	197	NA	NA	NA	79	NA	NA	NA	NA	right	axillary lymph node dissection alone	NA	NA	nationwide children's hospital	NA	NA	NA	tcga-ac-a3eh-f65834	040824b3-8139-4984-8578-00c653c57223	canonical	NA	positive	NA	NA	NA	NA	negative	modified radical mastectomy	NA	NA	NA	NA	NA	no	21	30	NA	NA	-29014	0	0	NA	NA	NA	NA
TCGA-AC-A3HN-01A	e37ae674-a107-4eb3-94d8-b86b0035a9f7	a3hn	alive	0	496	NA	NA	NA	87	NA	NA	NA	NA	left upper inner quadrant	sentinel node biopsy alone	NA	NA	nationwide children's hospital	NA	NA	NA	tcga-ac-a3hn-f65835	3b8f9ab2-2433-441b-b393-4247e781e2f3	canonical	NA	positive	3 point scale	1+	3 point scale	NA	positive	simple mastectomy	NA	NA	NA	NA	NA	yes	21	30	NA	NA	-32061	0	0	NA	NA	no	NA
TCGA-AC-A3OD-01A	f2622cdb-ac92-42b3-a1ca-67e133c3dd4a	a3od	alive	0	451	NA	NA	NA	68	NA	NA	NA	NA	left	sentinel lymph node biopsy plus axillary dissection	NA	NA	nationwide children's hospital	NA	NA	ffpe validation	tcga-ac-a3od-f45582	1c298e20-d286-4a08-9193-1ab7f91cc8bd	canonical - plus	NA	positive	NA	NA	NA	NA	positive	modified radical mastectomy	NA	NA	NA	NA	NA	yes	21	17	NA	NA	-25186	0	0	NA	NA	no	NA
TCGA-AC-A3QP-01A	6f4c8d30-47fb-47df-9eb7-4e5881e3711e	a3qp	alive	0	675	NA	NA	NA	79	NA	NA	NA	NA	right	sentinel node biopsy alone	NA	NA	nationwide children's hospital	NA	NA	NA	tcga-ac-a3qp-f56161	c88a67c7-bd93-497b-9c15-0c721bde4168	canonical	NA	positive	NA	NA	NA	NA	positive	lumpectomy	NA	NA	NA	NA	NA	NA	21	29	NA	NA	-29113	0	0	NA	NA	no	NA
TCGA-AC-A3QQ-01A	95cef916-5545-455b-920c-773a54fc7676	a3qq	alive	0	734	NA	NA	NA	54	NA	NA	NA	NA	right	sentinel node biopsy alone	NA	NA	nationwide children's hospital	NA	NA	ffpe validation	tcga-ac-a3qq-f66024	fc62b467-765c-4836-b773-c315de7a3049	canonical - plus	NA	positive	3 point scale	3+	3 point scale	NA	positive	other	NA	NA	NA	NA	NA	yes	21	1	NA	NA	-19723	0	0	NA	NA	NA	NA
TCGA-AC-A3TM-01A	67c73260-a242-4bba-87c5-d2302556dff7	a3tm	alive	0	762	NA	NA	NA	50	NA	NA	NA	NA	right	sentinel node biopsy alone	NA	NA	nationwide children's hospital	NA	NA	NA	tcga-ac-a3tm-f60193	56c9b648-1452-4ac4-bd75-e1ef3f85a933	canonical	NA	positive	NA	NA	NA	NA	positive	simple mastectomy	NA	NA	NA	NA	NA	yes	21	31	NA	NA	-18535	0	0	NA	NA	no	NA
TCGA-AC-A3TN-01A	81b70c58-4a12-448c-a594-2ade44f6a0ae	a3tn	alive	0	456	NA	NA	NA	75	NA	NA	NA	NA	right	sentinel lymph node biopsy plus axillary dissection	NA	NA	nationwide children's hospital	NA	NA	NA	tcga-ac-a3tn-f60190	df2e666e-e3d8-430f-8006-49177fda1884	canonical	NA	positive	NA	NA	NA	NA	positive	simple mastectomy	NA	NA	NA	NA	NA	NA	21	31	NA	NA	-27421	0	0	NA	NA	no	NA
TCGA-AC-A3W7-01A	2481a671-760b-428c-968d-42e25fd42ac5	a3w7	alive	0	471	NA	NA	NA	66	NA	NA	NA	NA	right upper outer quadrant	sentinel node biopsy alone	NA	NA	nationwide children's hospital	NA	NA	NA	tcga-ac-a3w7-f57847	51e87969-0929-4751-8663-2fb10328655b	canonical	NA	positive	NA	NA	NA	NA	negative	simple mastectomy	NA	NA	NA	NA	NA	no	21	27	NA	NA	-24327	0	0	NA	NA	NA	NA
TCGA-AC-A3YI-01A	a45d296e-efc0-479e-b2f6-bad834668cdf	a3yi	alive	0	707	NA	NA	NA	74	NA	NA	NA	NA	right	sentinel lymph node biopsy plus axillary dissection	NA	NA	nationwide children's hospital	NA	NA	NA	tcga-ac-a3yi-f61513	7ca1e88a-71ba-41ea-9d4f-88daf4fdbf8d	canonical	NA	positive	NA	NA	NA	NA	positive	lumpectomy	NA	NA	NA	NA	NA	no	21	30	NA	NA	-27143	0	0	NA	NA	NA	NA
TCGA-AC-A3YJ-01A	86cf879e-3b40-44dd-aaa7-6f49f54a15d9	a3yj	alive	0	754	NA	NA	NA	66	NA	NA	NA	NA	right	sentinel node biopsy alone	NA	NA	nationwide children's hospital	NA	NA	NA	tcga-ac-a3yj-f60187	f91129e1-94ba-4771-b7fa-4f07ca7cb24b	canonical	NA	positive	NA	NA	NA	NA	positive	modified radical mastectomy	NA	NA	NA	NA	NA	yes	21	31	NA	NA	-24439	0	0	NA	NA	NA	NA
TCGA-AC-A4ZE-01A	0cf0d67c-2f7f-42a6-94f3-407d0ec46c88	a4ze	alive	0	890	NA	NA	NA	63	NA	NA	NA	NA	right lower outer quadrant	sentinel node biopsy alone	NA	NA	nationwide children's hospital	NA	NA	NA	tcga-ac-a4ze-f72379	93befc77-d0bc-4528-a5d1-3774d3341331	canonical	NA	positive	NA	NA	NA	NA	positive	simple mastectomy	NA	NA	NA	NA	NA	no	21	9	NA	NA	-23284	0	0	NA	NA	NA	NA
TCGA-AC-A5EH-01A	d13fb44b-291b-4ea4-920c-142daa8d1989	a5eh	alive	0	511	NA	NA	NA	76	NA	NA	NA	NA	left upper outer quadrant	axillary lymph node dissection alone	NA	NA	nationwide children's hospital	NA	NA	NA	tcga-ac-a5eh-f60185	0bf107a0-50a7-481b-957d-e8f1c0a4d8f2	canonical	NA	positive	NA	NA	NA	NA	negative	modified radical mastectomy	NA	NA	NA	NA	NA	no	21	31	NA	NA	-27964	0	0	NA	NA	NA	NA
TCGA-AC-A5XU-01A	97677fd7-8523-48c5-a8ce-614fd4010551	a5xu	alive	0	455	NA	NA	NA	74	NA	NA	NA	NA	left upper outer quadrant	sentinel node biopsy alone	NA	NA	nationwide children's hospital	NA	NA	NA	tcga-ac-a5xu-f60181	8f4ef134-a173-4b96-bcbc-ee7249039a4e	canonical	NA	positive	NA	NA	NA	NA	positive	lumpectomy	NA	NA	NA	NA	NA	NA	21	31	NA	NA	-27191	0	0	NA	NA	NA	NA
TCGA-AC-A62V-01A	d5f2b85a-94a9-4168-bbe8-149ec71342b0	a62v	dead	348	348	NA	NA	NA	58	NA	NA	NA	NA	right lower outer quadrant	axillary lymph node dissection alone	NA	NA	nationwide children's hospital	NA	NA	NA	tcga-ac-a62v-f60177	cb4e105e-d21e-4f43-a860-f45aeead0e9a	canonical	NA	positive	NA	NA	NA	NA	positive	modified radical mastectomy	NA	NA	NA	NA	NA	no	21	31	NA	NA	-21389	0	0	NA	NA	NA	NA
TCGA-AC-A62Y-01A	05af737d-89aa-49b6-97b2-28b8ac8bd2cf	a62y	alive	0	530	NA	NA	NA	79	NA	NA	NA	NA	right	sentinel node biopsy alone	NA	NA	nationwide children's hospital	NA	NA	NA	tcga-ac-a62y-f65833	566b4f48-ea89-45eb-b57f-28d307b98c2c	canonical	NA	positive	3 point scale	NA	3 point scale	NA	positive	modified radical mastectomy	NA	NA	NA	NA	NA	no	21	30	NA	NA	-28876	0	0	NA	NA	NA	NA
TCGA-AC-A6IV-01A	8e11c5ec-c15a-48d4-85ac-b7b08a9ed827	a6iv	alive	0	568	NA	NA	NA	47	NA	NA	NA	NA	right	sentinel node biopsy alone	NA	NA	nationwide children's hospital	NA	NA	NA	tcga-ac-a6iv-f66023	41fe4d10-71f7-4a3d-99b6-8759a24b835a	canonical	NA	positive	NA	NA	NA	NA	positive	modified radical mastectomy	NA	NA	NA	NA	NA	yes	21	1	NA	NA	-17521	0	0	NA	NA	NA	NA
TCGA-AC-A6IW-01A	8183f0fb-2303-4d7b-bccd-55e5031fc7df	a6iw	alive	0	413	NA	NA	NA	73	NA	NA	NA	NA	left upper outer quadrant	sentinel node biopsy alone	NA	NA	nationwide children's hospital	NA	NA	NA	tcga-ac-a6iw-f64106	a62988ae-f527-4dab-b4f0-f6fd96dc156f	canonical	NA	negative	NA	NA	NA	NA	negative	simple mastectomy	NA	NA	NA	NA	NA	yes	21	26	NA	NA	-26896	0	0	NA	NA	NA	NA
TCGA-AC-A6IX-01A	7486a2b3-b09f-4e9c-9864-8b51b58d9fb3	a6ix	alive	0	373	NA	NA	NA	49	NA	NA	NA	NA	left upper outer quadrant	axillary lymph node dissection alone	NA	NA	nationwide children's hospital	NA	NA	primary tumor and metastatic tumor(s)	tcga-ac-a6ix-f66025	23a43b78-ce3e-4306-96bb-f26bdc52fb61	canonical - plus	NA	positive	NA	NA	NA	NA	positive	modified radical mastectomy	NA	NA	NA	NA	NA	no	21	1	NA	NA	-17969	0	0	NA	NA	NA	NA
TCGA-AC-A6NO-01A	8d9b50d1-139b-4447-ae9c-e54764d9e2a7	a6no	alive	0	51	NA	NA	NA	43	NA	NA	NA	NA	right	axillary lymph node dissection alone	NA	NA	nationwide children's hospital	NA	NA	NA	NA	NA	canonical	NA	positive	NA	NA	NA	NA	positive	modified radical mastectomy	NA	NA	NA	NA	NA	no	21	10	NA	NA	-15996	0	0	NA	NA	NA	NA
TCGA-AC-A7VB-01A	56230e4a-29ca-4f37-a0f9-730dbdfb6fa2	a7vb	alive	0	250	NA	NA	NA	51	NA	NA	NA	NA	right lower outer quadrant	sentinel lymph node biopsy plus axillary dissection	NA	NA	nationwide children's hospital	NA	NA	NA	tcga-ac-a7vb-f66026	1b155b86-984d-4c0b-995c-f687fda6901e	canonical	NA	positive	NA	NA	NA	NA	negative	modified radical mastectomy	NA	NA	NA	NA	NA	no	21	1	NA	NA	-18806	0	0	NA	NA	NA	NA
TCGA-AC-A7VC-01A	2b36853f-34d3-47c5-ba6a-e5a93233d2b1	a7vc	alive	0	1	NA	NA	NA	56	NA	NA	NA	NA	left	sentinel node biopsy alone	NA	NA	nationwide children's hospital	NA	NA	NA	NA	NA	canonical	NA	negative	NA	NA	NA	NA	negative	simple mastectomy	NA	NA	NA	NA	NA	yes	21	29	NA	NA	-20479	0	0	NA	NA	NA	NA
TCGA-AC-A8OP-01A	b9c6c069-2a2b-4cc7-a398-dc45c132d979	a8op	alive	0	614	NA	NA	NA	72	NA	NA	NA	NA	right lower inner quadrant	sentinel node biopsy alone	NA	NA	nationwide children's hospital	NA	NA	NA	tcga-ac-a8op-f66027	051ed97e-b012-42ef-bd2d-25af9ee444f3	canonical	NA	positive	NA	NA	NA	NA	positive	simple mastectomy	NA	NA	NA	NA	NA	yes	21	1	NA	NA	-26550	0	0	NA	NA	NA	NA
TCGA-AC-A8OQ-01A	dfaabd03-2d40-4422-b210-caf112ff4229	a8oq	alive	0	34	NA	NA	NA	72	NA	NA	NA	NA	right upper outer quadrant	sentinel node biopsy alone	NA	NA	nationwide children's hospital	NA	NA	NA	NA	NA	canonical	NA	negative	NA	NA	NA	NA	negative	lumpectomy	NA	NA	NA	NA	NA	no	21	26	NA	NA	-26535	0	0	NA	NA	NA	NA
TCGA-AC-A8OR-01A	8cd1ba0b-ead9-4661-a796-6c9dbf1c42cd	a8or	alive	0	40	NA	NA	NA	75	NA	NA	NA	NA	left	sentinel node biopsy alone	NA	NA	nationwide children's hospital	NA	NA	NA	NA	NA	canonical	NA	positive	NA	NA	NA	NA	positive	simple mastectomy	NA	NA	NA	NA	NA	yes	21	26	NA	NA	-27605	0	0	NA	NA	NA	NA
TCGA-AC-A8OS-01A	d5e655fe-3fbc-47b0-ba23-1d1dd01d591c	a8os	alive	0	70	NA	NA	NA	71	NA	NA	NA	NA	right upper outer quadrant	sentinel node biopsy alone	NA	NA	nationwide children's hospital	NA	NA	NA	NA	NA	canonical	NA	positive	NA	NA	NA	NA	positive	simple mastectomy	NA	NA	NA	NA	NA	yes	21	26	NA	NA	-26248	0	0	NA	NA	NA	NA
TCGA-AN-A03X-01A	88cd6ccc-70f7-436e-a99c-039b9d31e335	a03x	alive	0	10	NA	NA	NA	74	NA	NA	NA	NA	left upper outer quadrant	no axillary staging	NA	NA	nationwide children's hospital	NA	NA	NA	tcga-an-a03x-f68976	469f1acf-b8fd-4f11-9fe1-d2dba8d25947	canonical	NA	positive	NA	NA	NA	NA	positive	modified radical mastectomy	NA	NA	NA	NA	NA	no	21	24	NA	NA	-27163	0	0	NA	NA	NA	NA
TCGA-AN-A03Y-01A	a991644b-3ee6-4cda-acf0-e37de48a49fc	a03y	alive	0	10	NA	NA	NA	66	NA	NA	NA	NA	left upper outer quadrant	no axillary staging	NA	NA	nationwide children's hospital	NA	NA	NA	tcga-an-a03y-f68977	53ffc456-27b7-427b-9e7b-e89905dc80e9	canonical	NA	positive	NA	NA	NA	NA	positive	modified radical mastectomy	NA	NA	NA	NA	NA	no	21	24	NA	NA	-24232	0	0	NA	NA	NA	NA
TCGA-AN-A041-01A	316e021c-5175-4ab3-bdb6-2bf9683f657a	a041	alive	0	7	NA	NA	NA	29	NA	NA	NA	NA	left upper outer quadrant	NA	NA	NA	nationwide children's hospital	NA	NA	NA	tcga-an-a041-f68971	d69b074b-6c93-4843-b205-6d3254728c90	canonical	NA	positive	NA	NA	NA	NA	negative	NA	NA	NA	NA	NA	NA	NA	21	24	NA	NA	-10812	0	0	NA	NA	no	NA
TCGA-AN-A046-01A	dcd5860c-7e3a-44f3-a732-fe92fe3fe300	a046	alive	0	10	NA	NA	NA	68	NA	NA	NA	NA	right lower inner quadrant	no axillary staging	NA	NA	nationwide children's hospital	NA	NA	NA	tcga-an-a046-f68972	f3d0b69a-e347-4523-9c79-5a50fae60bb6	canonical	NA	positive	NA	NA	NA	NA	positive	modified radical mastectomy	NA	NA	NA	NA	NA	no	21	24	NA	NA	-25158	0	0	NA	NA	NA	NA
TCGA-AN-A049-01A	2e1e3bf0-1708-4b65-936c-48b89eb8966a	a049	alive	0	19	NA	NA	NA	62	NA	NA	NA	NA	left upper outer quadrant	no axillary staging	NA	NA	nationwide children's hospital	NA	NA	NA	tcga-an-a049-f68978	fe2ac366-da1d-44c8-acf7-b1703e8dafc4	canonical	NA	positive	NA	2+	NA	modified radical mastectomy	positive	simple mastectomy	NA	NA	NA	NA	NA	no	21	24	NA	NA	-22710	0	0	NA	NA	NA	NA
TCGA-AN-A04A-01A	e5aae05a-478e-4a55-a27c-12b2b4be302a	a04a	alive	0	90	NA	NA	NA	36	left lower outer quadrant	NA	NA	NA	left lower inner quadrant	no axillary staging	NA	NA	nationwide children's hospital	NA	NA	NA	tcga-an-a04a-f68973	7c41e6f7-07dd-4dfa-8ebb-82c1546e7788	canonical	NA	positive	NA	1+	NA	modified radical mastectomy	positive	simple mastectomy	NA	NA	NA	NA	NA	no	21	24	NA	NA	-13445	0	0	NA	NA	NA	NA
TCGA-AN-A04C-01A	66072c06-f251-4f0b-b6ae-12b407c52cc6	a04c	alive	0	54	NA	NA	NA	51	NA	NA	NA	NA	left upper outer quadrant	axillary lymph node dissection alone	NA	NA	nationwide children's hospital	NA	NA	NA	tcga-an-a04c-f68974	6e0ab9fc-6cd3-4762-ad22-cca478e6c580	canonical	NA	negative	NA	0	NA	modified radical mastectomy	negative	simple mastectomy	NA	NA	NA	NA	NA	no	21	24	NA	NA	-18851	0	0	NA	NA	NA	NA
TCGA-AN-A04D-01A	49717f75-0f2d-4e1c-9a12-f1cd7877b80a	a04d	alive	0	52	NA	NA	NA	58	NA	NA	NA	NA	left upper outer quadrant	no axillary staging	NA	NA	nationwide children's hospital	NA	NA	NA	tcga-an-a04d-f68975	ee0071b8-0c20-431b-8150-16603c61d46f	canonical	NA	negative	NA	0	NA	modified radical mastectomy	negative	simple mastectomy	NA	NA	NA	NA	NA	no	21	24	NA	NA	-21426	0	0	NA	NA	NA	NA
TCGA-AN-A0AJ-01A	9646160a-f1f9-437b-8c7d-efb0b57bfb97	a0aj	alive	0	303	NA	NA	NA	79	NA	NA	NA	NA	left upper outer quadrant	axillary lymph node dissection alone	NA	NA	nationwide children's hospital	NA	NA	NA	tcga-an-a0aj-f68941	f68bda17-ace3-4591-b611-ec8c99fdbd17	canonical	NA	positive	NA	2+	NA	NA	positive	modified radical mastectomy	NA	NA	NA	NA	NA	no	21	23	NA	NA	-29131	0	0	NA	NA	NA	NA
TCGA-AN-A0AK-01A	9e894662-b718-40f8-8899-b5e036cfbd76	a0ak	alive	0	224	NA	NA	NA	76	NA	NA	NA	NA	left upper outer quadrant	axillary lymph node dissection alone	NA	NA	nationwide children's hospital	NA	NA	NA	tcga-an-a0ak-f68942	62a33b4d-8305-4a17-85e8-832c43a07ed5	canonical	NA	positive	NA	0	NA	NA	negative	modified radical mastectomy	NA	NA	NA	NA	NA	no	21	23	NA	NA	-27977	0	0	NA	NA	NA	NA
TCGA-AN-A0AL-01A	3e9f93c0-aa79-4b4c-bd6c-b3325912362a	a0al	alive	0	227	NA	NA	NA	41	NA	NA	NA	NA	left lower outer quadrant	axillary lymph node dissection alone	NA	NA	nationwide children's hospital	NA	NA	NA	tcga-an-a0al-f68944	02c99963-3c0b-4888-bd6f-f1c920e08720	canonical	NA	negative	NA	0	NA	NA	negative	modified radical mastectomy	NA	NA	NA	NA	NA	no	21	23	NA	NA	-15286	0	0	NA	NA	NA	NA
TCGA-AN-A0AM-01A	00a2d166-78c9-4687-a195-3d6315c27574	a0am	alive	0	5	NA	NA	NA	56	NA	NA	NA	NA	left upper outer quadrant	no axillary staging	NA	NA	nationwide children's hospital	NA	NA	NA	tcga-an-a0am-f68945	ccd98b71-7fc0-4fb5-9595-b9e2959a20f0	canonical	NA	positive	NA	NA	NA	NA	negative	modified radical mastectomy	NA	NA	NA	NA	NA	no	21	23	NA	NA	-20713	0	0	NA	NA	NA	NA
TCGA-AN-A0AR-01A	ebc460c2-df88-4dc0-a2c0-aca8072b75ad	a0ar	alive	0	10	NA	NA	NA	55	NA	NA	NA	NA	right upper inner quadrant	no axillary staging	NA	NA	nationwide children's hospital	NA	NA	NA	tcga-an-a0ar-f68946	07fe1a95-d842-4df8-9eaa-36d34c7989dd	canonical	NA	negative	NA	0	NA	NA	negative	modified radical mastectomy	NA	NA	NA	NA	NA	no	21	23	NA	NA	-20152	0	0	NA	NA	NA	NA
TCGA-AN-A0AS-01A	7c2a8440-0206-4039-8474-8d62f6c7de0c	a0as	alive	0	10	NA	NA	NA	70	NA	NA	NA	NA	left upper outer quadrant	no axillary staging	NA	NA	nationwide children's hospital	NA	NA	NA	tcga-an-a0as-f68947	6da8757d-7d76-4a0b-b31f-24a36d38e1f8	canonical	NA	positive	NA	0	NA	NA	negative	modified radical mastectomy	NA	NA	NA	NA	NA	no	21	23	NA	NA	-25658	0	0	NA	NA	NA	NA
TCGA-AN-A0AT-01A	05506f4c-e701-4a9d-ae06-97f066aade43	a0at	alive	0	10	NA	NA	NA	62	NA	NA	NA	NA	right upper inner quadrant	no axillary staging	NA	NA	nationwide children's hospital	NA	NA	NA	tcga-an-a0at-f68948	6e5c0241-d8be-4db8-8893-0e939cced8f6	canonical	NA	negative	NA	NA	NA	NA	negative	modified radical mastectomy	NA	NA	NA	NA	NA	no	21	23	NA	NA	-22798	0	0	NA	NA	NA	NA
TCGA-AN-A0FD-01A	c6086936-7544-4da0-8c0c-114166848483	a0fd	alive	0	196	NA	NA	NA	71	NA	NA	NA	NA	left upper outer quadrant	axillary lymph node dissection alone	NA	NA	nationwide children's hospital	NA	NA	NA	tcga-an-a0fd-f68949	9fb2953c-eb8b-42e6-af03-f9ef349ada40	canonical	NA	positive	NA	1+	NA	NA	positive	modified radical mastectomy	NA	NA	NA	NA	NA	no	21	23	NA	NA	-26007	0	0	NA	NA	NA	NA
TCGA-AN-A0FF-01A	d5cab7f5-e4f1-40ee-a0c8-4c8004c1c9a0	a0ff	alive	0	172	NA	NA	NA	32	NA	NA	NA	NA	left upper outer quadrant	axillary lymph node dissection alone	NA	NA	nationwide children's hospital	NA	NA	NA	tcga-an-a0ff-f68943	9b3d0eee-f464-4e46-b81d-a11ed9a05517	canonical	NA	positive	NA	3+	NA	NA	positive	modified radical mastectomy	NA	NA	NA	NA	NA	no	21	23	NA	NA	-11929	0	0	NA	NA	NA	NA
TCGA-AN-A0FJ-01A	546248b0-22a0-4b70-a437-76fb0a238a0d	a0fj	alive	0	242	NA	NA	NA	59	NA	NA	NA	NA	left upper outer quadrant	axillary lymph node dissection alone	NA	NA	nationwide children's hospital	NA	NA	NA	tcga-an-a0fj-f68950	6a061e72-8985-4c17-ab5a-bae6f2aaeb10	canonical	NA	positive	NA	0	NA	NA	negative	modified radical mastectomy	NA	NA	NA	NA	NA	no	21	23	NA	NA	-21910	0	0	NA	NA	NA	NA
TCGA-AN-A0FK-01A	2f4cbedf-ed7e-45a2-bf34-f1d1e696bdde	a0fk	alive	0	213	NA	NA	NA	88	NA	NA	NA	NA	right lower outer quadrant	axillary lymph node dissection alone	NA	NA	nationwide children's hospital	NA	NA	NA	tcga-an-a0fk-f68951	f72119d9-67b0-4548-b682-73e6069e2d9a	canonical	NA	positive	NA	3+	NA	NA	positive	modified radical mastectomy	NA	NA	NA	NA	NA	no	21	23	NA	NA	-32462	0	0	NA	NA	NA	NA
TCGA-AN-A0FL-01A	baf1207d-7d1a-4cad-ba58-62c26be2415e	a0fl	alive	0	231	NA	NA	NA	62	NA	NA	NA	NA	left upper inner quadrant	axillary lymph node dissection alone	NA	NA	nationwide children's hospital	NA	NA	NA	tcga-an-a0fl-f68952	240e4926-540a-4b61-a6ce-1a9793228a2b	canonical	NA	negative	NA	1+	NA	NA	negative	modified radical mastectomy	NA	NA	NA	NA	NA	no	21	23	NA	NA	-22805	0	0	NA	NA	NA	NA
TCGA-AN-A0FN-01A	c2a742fe-3e8b-4210-85a6-7191a1123609	a0fn	alive	0	218	NA	NA	NA	61	NA	NA	NA	NA	right lower outer quadrant	axillary lymph node dissection alone	NA	NA	nationwide children's hospital	NA	NA	NA	tcga-an-a0fn-f68953	16502f77-c804-49d7-99f6-20f92037d659	canonical	NA	positive	NA	1+	NA	NA	positive	modified radical mastectomy	NA	NA	NA	NA	NA	no	21	23	NA	NA	-22629	0	0	NA	NA	NA	NA
TCGA-AN-A0FS-01A	10c9be1e-2cc0-45e4-8d2c-c013ea63ef05	a0fs	alive	0	210	NA	NA	NA	55	NA	NA	NA	NA	right lower outer quadrant	axillary lymph node dissection alone	NA	NA	nationwide children's hospital	NA	NA	NA	tcga-an-a0fs-f68954	80a52799-160b-4844-83fc-f6d6f06e60c4	canonical	NA	positive	NA	0	NA	NA	negative	modified radical mastectomy	NA	NA	NA	NA	NA	no	21	23	NA	NA	-20352	0	0	NA	NA	NA	NA
TCGA-AN-A0FT-01A	baf5e81f-2322-41ec-9053-b9559a7993bc	a0ft	alive	0	214	NA	NA	NA	63	NA	NA	NA	NA	right lower outer quadrant	axillary lymph node dissection alone	NA	NA	nationwide children's hospital	NA	NA	NA	tcga-an-a0ft-f68964	a4de618b-9df9-4c32-89ba-4c48d4e00dee	canonical	NA	positive	NA	3+	NA	NA	positive	modified radical mastectomy	NA	NA	NA	NA	NA	no	21	24	NA	NA	-23300	0	0	NA	NA	NA	NA
TCGA-AN-A0FV-01A	2e8e70f2-c781-44c2-8f12-1f8c2f536aa3	a0fv	alive	0	10	NA	NA	NA	58	NA	NA	NA	NA	right upper outer quadrant	no axillary staging	NA	NA	nationwide children's hospital	NA	NA	NA	tcga-an-a0fv-f68965	b6fdcfd2-3073-48ef-8c35-a799915d4467	canonical	NA	negative	NA	NA	NA	NA	negative	modified radical mastectomy	NA	NA	NA	NA	NA	no	21	24	NA	NA	-21479	0	0	NA	NA	NA	NA
TCGA-AN-A0FW-01A	e112b452-8850-4353-bfed-0dbdc243290b	a0fw	alive	0	11	NA	NA	NA	67	NA	NA	NA	NA	left upper outer quadrant	no axillary staging	NA	NA	nationwide children's hospital	NA	NA	NA	tcga-an-a0fw-f68966	09ae2056-27e8-4b1d-b3ba-67034b18cfec	canonical	NA	positive	NA	NA	NA	NA	indeterminate	modified radical mastectomy	NA	NA	NA	NA	NA	no	21	24	NA	NA	-24692	0	0	NA	NA	NA	NA
TCGA-AN-A0FX-01A	13b860c3-8048-4dc9-9eb0-7480bc660837	a0fx	alive	0	10	NA	NA	NA	52	NA	NA	NA	NA	left upper outer quadrant	no axillary staging	NA	NA	nationwide children's hospital	NA	NA	NA	tcga-an-a0fx-f68967	29111d0e-e852-4132-98d1-efdeb235f4f6	canonical	NA	negative	NA	NA	NA	NA	negative	modified radical mastectomy	NA	NA	NA	NA	NA	no	21	24	NA	NA	-19309	0	0	NA	NA	NA	NA
TCGA-AN-A0FY-01A	de75d0b9-0f47-4732-8df5-05c350cfcd32	a0fy	alive	0	10	NA	NA	NA	55	NA	NA	NA	NA	left upper outer quadrant	no axillary staging	NA	NA	nationwide children's hospital	NA	NA	NA	tcga-an-a0fy-f68968	b6587f06-c3d0-4336-8b60-9dfac3c4898a	canonical	NA	positive	NA	NA	NA	NA	positive	modified radical mastectomy	NA	NA	NA	NA	NA	no	21	24	NA	NA	-20347	0	0	NA	NA	NA	NA
TCGA-AN-A0FZ-01A	8240c4ae-f878-4882-aa07-7857c7ac52cf	a0fz	alive	0	10	NA	NA	NA	45	NA	NA	NA	NA	left upper outer quadrant	no axillary staging	NA	NA	nationwide children's hospital	NA	NA	NA	tcga-an-a0fz-f68969	5e7ac543-2d63-4f9a-95a9-9f1aa3c5b8a0	canonical	NA	positive	NA	NA	NA	NA	negative	modified radical mastectomy	NA	NA	NA	NA	NA	no	21	24	NA	NA	-16533	0	0	NA	NA	NA	NA
TCGA-AN-A0G0-01A	96312510-c126-485d-8109-ed81844a1dc3	a0g0	alive	0	16	NA	NA	NA	56	NA	NA	NA	NA	right upper inner quadrant	no axillary staging	NA	NA	nationwide children's hospital	NA	NA	NA	tcga-an-a0g0-f68970	15a83d83-b3d3-45e7-8262-3e6cdc4b1c5d	canonical	NA	negative	NA	NA	NA	NA	negative	modified radical mastectomy	NA	NA	NA	NA	NA	no	21	24	NA	NA	-20504	0	0	NA	NA	NA	NA
TCGA-AN-A0XL-01A	4649dee3-b668-44cd-ab97-3834de3ef8f8	a0xl	alive	0	163	NA	NA	NA	61	NA	NA	NA	NA	left upper outer quadrant	NA	NA	NA	nationwide children's hospital	NA	NA	NA	tcga-an-a0xl-f68955	3060f448-5814-4cf8-b2cf-ab1b70f1098b	canonical	NA	positive	NA	NA	NA	NA	positive	NA	NA	NA	NA	NA	NA	NA	21	23	NA	NA	-22341	0	0	NA	NA	no	NA
TCGA-AN-A0XN-01A	4e3699da-4367-4a43-9d66-a117d3ad460d	a0xn	alive	0	10	NA	NA	NA	68	NA	NA	NA	NA	right upper inner quadrant	NA	NA	NA	nationwide children's hospital	NA	NA	NA	tcga-an-a0xn-f68956	00af090c-547a-493b-9220-2fef43822fd0	canonical	NA	negative	NA	NA	NA	NA	positive	NA	NA	NA	NA	NA	NA	NA	21	23	NA	NA	-25029	0	0	NA	NA	no	NA
TCGA-AN-A0XO-01A	195b6731-6ae6-416e-a345-0eb8874a0ca2	a0xo	alive	0	375	NA	NA	NA	59	NA	NA	NA	NA	left upper outer quadrant	NA	NA	NA	nationwide children's hospital	NA	NA	NA	tcga-an-a0xo-f68957	24def0f1-801a-49b6-b800-68003374231a	canonical	NA	positive	NA	NA	NA	NA	negative	NA	NA	NA	NA	NA	NA	NA	21	23	NA	NA	-21640	0	0	NA	NA	no	NA
TCGA-AN-A0XP-01A	cf0e7e4e-b857-4db5-9ae2-551a899f77be	a0xp	alive	0	9	NA	NA	NA	69	NA	NA	NA	NA	right upper inner quadrant	NA	NA	NA	nationwide children's hospital	NA	NA	NA	tcga-an-a0xp-f68958	158ce98d-2791-4e1c-ac57-0a24bd75beb7	canonical	NA	positive	NA	NA	NA	NA	positive	NA	NA	NA	NA	NA	NA	NA	21	23	NA	NA	-25305	0	0	NA	NA	no	NA
TCGA-AN-A0XR-01A	f51af6db-2655-47fb-9ffc-83a503a728ea	a0xr	alive	0	10	NA	NA	NA	55	NA	NA	NA	NA	left upper outer quadrant	NA	NA	NA	nationwide children's hospital	NA	NA	NA	tcga-an-a0xr-f56951	b7a4a241-84fc-4828-8cea-3ba465fdf1ca	canonical	NA	positive	NA	NA	NA	NA	negative	NA	NA	NA	NA	NA	NA	NA	21	23	NA	NA	-20381	0	0	NA	NA	no	NA
TCGA-AN-A0XS-01A	95e949d3-b1f3-46c6-9451-8fe92c99e4cf	a0xs	alive	0	10	NA	NA	NA	63	NA	NA	NA	NA	left upper outer quadrant	NA	NA	NA	nationwide children's hospital	NA	NA	NA	tcga-an-a0xs-f68959	81bf97a6-7c9e-480b-a317-746e9a86cdb8	canonical	NA	negative	NA	NA	NA	NA	positive	NA	NA	NA	NA	NA	NA	NA	21	23	NA	NA	-23358	0	0	NA	NA	no	NA
TCGA-AN-A0XT-01A	3e25056d-d137-49f5-abaa-f68509426600	a0xt	alive	0	10	NA	NA	NA	54	NA	NA	NA	NA	left upper outer quadrant	NA	NA	NA	nationwide children's hospital	NA	NA	NA	tcga-an-a0xt-f68960	837b572d-29d8-4983-8304-068372bd90dc	canonical	NA	positive	NA	NA	NA	NA	negative	NA	NA	NA	NA	NA	NA	NA	21	23	NA	NA	-19794	0	0	NA	NA	no	NA
TCGA-AN-A0XU-01A	a1da9db1-db11-4f4d-a249-c738db81b87e	a0xu	alive	0	10	NA	NA	NA	54	NA	NA	NA	NA	left upper outer quadrant	NA	NA	NA	nationwide children's hospital	NA	NA	NA	tcga-an-a0xu-f68961	4194e7b2-a2e1-4d92-80f0-394939fbcd04	canonical	NA	negative	NA	NA	NA	NA	negative	NA	NA	NA	NA	NA	NA	NA	21	23	NA	NA	-20052	0	0	NA	NA	no	NA
TCGA-AN-A0XV-01A	ac18b3a3-8d52-4e35-8625-673171a7fd92	a0xv	alive	0	162	NA	NA	NA	67	NA	NA	NA	NA	right upper outer quadrant	axillary lymph node dissection alone	NA	NA	nationwide children's hospital	NA	NA	NA	tcga-an-a0xv-f68962	0db9cdf6-70f8-4923-af76-d187338fb3ae	canonical	NA	positive	NA	1+	3 point scale	NA	positive	NA	NA	NA	NA	NA	NA	no	21	23	NA	NA	-24779	0	0	NA	NA	no	NA
TCGA-AN-A0XW-01A	39de7761-e762-4811-b95c-8216b79ae06b	a0xw	alive	0	170	NA	NA	NA	36	NA	NA	NA	NA	left upper outer quadrant	sentinel node biopsy alone	NA	NA	nationwide children's hospital	NA	NA	NA	tcga-an-a0xw-f68963	038da5d7-b5dc-4b04-9b85-82c2912ae73a	canonical	NA	positive	3 point scale	3+	3 point scale	NA	positive	NA	NA	NA	NA	NA	NA	no	21	23	NA	NA	-13208	0	0	NA	NA	no	NA
TCGA-AO-A03L-01A	1174f6e4-ffbe-4e59-a000-8d861c968369	a03l	alive	0	2442	NA	NA	NA	34	right upper outer quadrant	right lower inner quadrant	right lower outer quadrant	right	right upper inner quadrant	sentinel lymph node biopsy plus axillary dissection	NA	NA	nationwide children's hospital	NA	NA	NA	tcga-ao-a03l-f19390	cc654247-3426-49b3-b47e-c503b40f898c	canonical	NA	positive	NA	2+	NA	NA	positive	modified radical mastectomy	NA	NA	NA	NA	NA	no	21	12	NA	NA	-12443	0	0	NA	NA	NA	NA
TCGA-AO-A03M-01A	095c7985-3842-494f-b591-706ad1cd2133	a03m	alive	0	1866	NA	NA	NA	29	left	NA	NA	NA	left upper outer quadrant	sentinel node biopsy alone	NA	NA	nationwide children's hospital	NA	NA	NA	tcga-ao-a03m-f30186	62767797-1ceb-468b-a320-fb552f1b6627	canonical	NA	positive	NA	3+	NA	NA	positive	simple mastectomy	NA	NA	NA	NA	NA	yes	21	4	NA	NA	-10616	0	0	NA	NA	NA	NA
TCGA-AO-A03N-01A	9435447e-d65f-408b-863b-6576b1d652dd	a03n	alive	0	2031	NA	no	NA	59	left upper outer quadrant	left	NA	NA	left upper inner quadrant	sentinel lymph node biopsy plus axillary dissection	NA	NA	nationwide children's hospital	NA	NA	NA	tcga-ao-a03n-f20915	117be088-a51c-4e7f-b00b-919ff76f2596	canonical	NA	positive	NA	1+	NA	NA	positive	modified radical mastectomy	NA	NA	NA	NA	NA	no	21	24	NA	NA	-21816	0	0	NA	NA	NA	NA
TCGA-AO-A03O-01A	1111fb30-46ce-4722-98da-ec9ba2323d90	a03o	dead	2483	2483	NA	NA	NA	69	right	NA	NA	NA	right upper outer quadrant	sentinel lymph node biopsy plus axillary dissection	NA	NA	nationwide children's hospital	NA	NA	NA	tcga-ao-a03o-f3141	740a6308-84e3-4231-995d-82d7d5a34c86	canonical	NA	positive	NA	NA	NA	NA	positive	modified radical mastectomy	NA	NA	NA	NA	NA	yes	21	19	NA	NA	-25362	0	0	NA	NA	NA	NA
TCGA-AO-A03P-01A	2d4c778c-7f77-4f0a-8261-2086accf15fd	a03p	dead	2911	2911	NA	no	NA	54	right	NA	NA	NA	right upper outer quadrant	sentinel lymph node biopsy plus axillary dissection	NA	NA	nationwide children's hospital	NA	NA	NA	tcga-ao-a03p-f15452	46278b90-e76b-4b39-b3c0-42d6ac1cf690	canonical	NA	positive	NA	2+	NA	NA	positive	lumpectomy	NA	NA	NA	NA	NA	yes	21	22	NA	1922	-19724	0	0	2576	NA	NA	NA
TCGA-AO-A03R-01A	2e82e576-3095-4aee-9853-65f676647c34	a03r	alive	0	2091	NA	NA	NA	57	left upper outer quadrant	left	NA	NA	left upper inner quadrant	sentinel lymph node biopsy plus axillary dissection	NA	NA	nationwide children's hospital	NA	NA	NA	tcga-ao-a03r-f15469	bcd222ca-5847-43c0-8bea-028a0e76fa81	canonical	NA	positive	NA	2+	NA	NA	positive	modified radical mastectomy	NA	NA	NA	NA	NA	no	21	22	NA	NA	-20930	0	0	NA	NA	NA	NA
TCGA-AO-A03T-01A	dd6b64a8-d546-4fd1-bbbd-ac9703791cae	a03t	alive	0	2124	NA	NA	NA	42	left	NA	NA	NA	left upper outer quadrant	sentinel lymph node biopsy plus axillary dissection	NA	NA	nationwide children's hospital	NA	NA	NA	tcga-ao-a03t-f43476	7bfcb10d-e59d-4d33-92a0-b27e4be856c9	canonical	NA	positive	NA	2+	NA	NA	positive	modified radical mastectomy	NA	NA	NA	NA	NA	no	21	22	NA	NA	-15540	0	0	NA	NA	NA	NA
TCGA-AO-A03U-01A	0685edd2-ce1c-4e0e-8dda-393139af4223	a03u	dead	1793	1793	NA	no	NA	31	left upper outer quadrant	left lower inner quadrant	left lower outer quadrant	left	left upper inner quadrant	sentinel node biopsy alone	NA	NA	nationwide children's hospital	NA	NA	NA	tcga-ao-a03u-f20907	2cbbff6d-770d-4735-95b5-35acf9b4a070	canonical	NA	negative	NA	NA	NA	NA	negative	simple mastectomy	NA	NA	NA	NA	NA	yes	21	24	NA	NA	-11354	0	0	NA	NA	NA	NA
TCGA-AO-A03V-01A	a6cb373a-1604-4e25-bd81-da6c3e4f06ee	a03v	alive	0	1351	NA	NA	NA	41	left	NA	NA	NA	left upper inner quadrant	sentinel node biopsy alone	NA	NA	nationwide children's hospital	NA	NA	NA	tcga-ao-a03v-f20912	db9d76bf-adfa-4518-adec-b8fe3e187699	canonical	NA	positive	NA	2+	NA	NA	positive	simple mastectomy	NA	NA	NA	NA	NA	yes	21	24	NA	NA	-15284	0	0	NA	NA	NA	NA
TCGA-AO-A0J2-01A	d2f2560c-ec80-4fea-9474-c47a2e85ea95	a0j2	alive	0	997	NA	NA	NA	41	left	NA	NA	NA	left lower inner quadrant	sentinel node biopsy alone	NA	NA	nationwide children's hospital	NA	NA	NA	tcga-ao-a0j2-f15481	04b90c44-b6f4-4f85-a233-052b0c12c62b	canonical	NA	negative	NA	NA	NA	NA	negative	simple mastectomy	NA	NA	NA	NA	NA	yes	21	22	NA	NA	-15324	0	0	NA	NA	NA	NA
TCGA-AO-A0J3-01A	39cde586-df95-435f-b9a6-73b0c0ee5e92	a0j3	alive	0	651	NA	NA	NA	67	right upper outer quadrant	right lower inner quadrant	right lower outer quadrant	right	right upper inner quadrant	axillary lymph node dissection alone	NA	NA	nationwide children's hospital	NA	NA	NA	tcga-ao-a0j3-f15477	9f50dc63-8f33-4824-9078-b96b2188703d	canonical	NA	positive	NA	4+	NA	NA	positive	modified radical mastectomy	NA	NA	NA	NA	NA	yes	21	22	NA	NA	-24519	0	0	NA	NA	NA	NA
TCGA-AO-A0J4-01A	a9b7d7fe-be31-4f71-afee-c1bfdf511888	a0j4	alive	0	1587	NA	NA	NA	41	left	NA	NA	NA	left upper outer quadrant	sentinel node biopsy alone	NA	NA	nationwide children's hospital	NA	NA	NA	tcga-ao-a0j4-f15478	303d8ef0-9002-4b68-8e12-c5c5c5119275	canonical	NA	negative	NA	NA	NA	NA	negative	lumpectomy	NA	NA	NA	NA	NA	yes	21	22	NA	NA	-15052	0	0	NA	NA	NA	NA
TCGA-AO-A0J5-01A	c1442467-d618-435f-8792-b1a18f696f1a	a0j5	dead	792	792	NA	NA	NA	48	right upper outer quadrant	right lower inner quadrant	right lower outer quadrant	right	right upper inner quadrant	axillary lymph node dissection alone	NA	NA	nationwide children's hospital	NA	NA	NA	tcga-ao-a0j5-f19407	9c35625c-89d6-48ba-ae91-2b8411b85217	canonical	NA	positive	NA	NA	NA	NA	negative	modified radical mastectomy	NA	NA	NA	NA	NA	no	21	12	NA	NA	-17815	0	0	735	NA	NA	NA
TCGA-AO-A0J6-01A	e9f4f373-37a5-48ad-a1a0-b0d47820111a	a0j6	alive	0	1140	NA	NA	NA	61	left	NA	NA	NA	left upper outer quadrant	sentinel node biopsy alone	NA	NA	nationwide children's hospital	NA	NA	NA	tcga-ao-a0j6-f15479	970d7d07-69a6-4bf8-a92e-04769bb10b85	canonical	NA	negative	NA	NA	NA	NA	negative	lumpectomy	NA	NA	NA	NA	NA	yes	21	22	NA	NA	-22462	0	0	NA	NA	NA	NA
TCGA-AO-A0J7-01A	9536bec0-dae0-4d63-a1b3-956741835243	a0j7	alive	0	618	NA	NA	NA	71	left lower inner quadrant	left	NA	NA	left upper inner quadrant	sentinel lymph node biopsy plus axillary dissection	NA	NA	nationwide children's hospital	NA	NA	NA	tcga-ao-a0j7-f15480	39b5539a-e3e4-4585-9081-d1fdc294262f	canonical	NA	positive	NA	NA	NA	NA	positive	modified radical mastectomy	NA	NA	NA	NA	NA	no	21	22	NA	NA	-26281	0	0	NA	NA	NA	NA
TCGA-AO-A0J8-01A	02bf5203-f9cd-4c5a-97b4-e5584dc22325	a0j8	alive	0	680	NA	NA	NA	61	right	NA	NA	NA	right upper outer quadrant	sentinel node biopsy alone	NA	NA	nationwide children's hospital	NA	NA	NA	tcga-ao-a0j8-f15482	7f5ba75d-9eb6-4bd5-ac2e-101d65fbeb78	canonical	NA	positive	NA	3+	NA	NA	positive	lumpectomy	NA	NA	NA	NA	NA	yes	21	22	NA	NA	-22284	0	0	NA	NA	NA	NA
TCGA-AO-A0J9-01A	a4903de8-6cf5-4541-8ec7-065beace8b44	a0j9	alive	0	1613	NA	yes	NA	61	right upper outer quadrant	right	NA	NA	right upper inner quadrant	sentinel lymph node biopsy plus axillary dissection	NA	NA	nationwide children's hospital	NA	NA	NA	tcga-ao-a0j9-f15483	fc513014-fcb4-4f42-89f0-37a2db946ee9	canonical	negative	positive	NA	4+	NA	mastectomy nos	positive	lumpectomy	NA	NA	NA	NA	NA	no	21	22	NA	1066	-22642	0	0	NA	NA	NA	NA
TCGA-AO-A0JA-01A	86b7b206-8e69-432d-acc9-bccce710955e	a0ja	alive	0	655	NA	no	NA	36	right lower inner quadrant	right	NA	NA	right upper inner quadrant	sentinel lymph node biopsy plus axillary dissection	NA	NA	nationwide children's hospital	NA	NA	NA	tcga-ao-a0ja-f15484	de973a94-d71d-421f-9511-557735c21273	canonical	NA	positive	NA	1+	NA	NA	positive	modified radical mastectomy	NA	NA	NA	NA	NA	no	21	22	NA	143	-13307	0	0	NA	NA	NA	NA
TCGA-AO-A0JB-01A	3ea9412b-429e-4dcf-90cd-c53be06885a1	a0jb	alive	0	1542	NA	NA	NA	50	left upper outer quadrant	left lower outer quadrant	left	NA	left upper inner quadrant	axillary lymph node dissection alone	NA	NA	nationwide children's hospital	NA	NA	NA	tcga-ao-a0jb-f15485	4e6d473b-dbdc-4ab0-b7ca-6c8e595dcb23	canonical	NA	positive	NA	2+	NA	NA	positive	modified radical mastectomy	NA	NA	NA	NA	NA	no	21	22	NA	NA	-18561	0	0	NA	NA	NA	NA
TCGA-AO-A0JC-01A	03565036-b6d3-432f-8d9a-7099818e0788	a0jc	alive	0	1547	NA	NA	NA	64	right lower outer quadrant	right	NA	NA	right upper outer quadrant	sentinel lymph node biopsy plus axillary dissection	NA	NA	nationwide children's hospital	NA	NA	NA	tcga-ao-a0jc-f15486	a1e5be94-918a-4e6b-97dc-9c8be85726a8	canonical	NA	positive	NA	3+	NA	NA	positive	modified radical mastectomy	NA	NA	NA	NA	NA	yes	21	22	NA	NA	-23404	0	0	NA	NA	NA	NA
TCGA-AO-A0JD-01A	0a229f95-0ea1-4d63-953e-74f5ec2f3028	a0jd	alive	0	2190	NA	NA	NA	59	left	NA	NA	NA	left upper outer quadrant	sentinel lymph node biopsy plus axillary dissection	NA	NA	nationwide children's hospital	NA	NA	NA	tcga-ao-a0jd-f15487	a1246d11-43bb-492b-ae6e-fdb6790a8599	canonical	NA	positive	NA	2+	NA	NA	positive	modified radical mastectomy	NA	NA	NA	NA	NA	no	21	22	NA	NA	-21831	0	0	NA	NA	NA	NA
TCGA-AO-A0JE-01A	36fe6152-f61e-4948-9ccc-23ac01a9d77d	a0je	alive	0	2335	NA	NA	NA	53	right	NA	NA	NA	right lower outer quadrant	sentinel lymph node biopsy plus axillary dissection	NA	NA	nationwide children's hospital	NA	NA	NA	tcga-ao-a0je-f15488	975b8c53-2e18-4dbb-9a34-2dcca4680406	canonical	NA	negative	NA	NA	NA	NA	negative	lumpectomy	NA	NA	NA	NA	NA	no	21	22	NA	NA	-19516	0	0	NA	NA	NA	NA
TCGA-AO-A0JF-01A	f357fe19-5359-4662-8ce9-aa996132283b	a0jf	alive	0	1980	NA	NA	NA	68	left	NA	NA	NA	left upper outer quadrant	sentinel lymph node biopsy plus axillary dissection	NA	NA	nationwide children's hospital	NA	NA	NA	tcga-ao-a0jf-f72115	704fb623-3791-4e9d-8194-3c9b34439c3b	canonical	NA	positive	NA	2+	NA	NA	positive	lumpectomy	NA	NA	NA	NA	NA	no	21	15	NA	NA	-24923	0	0	NA	NA	NA	NA
TCGA-AO-A0JG-01A	58959e88-54e2-4558-9664-2effda7403dc	a0jg	alive	0	798	NA	NA	NA	49	right	NA	NA	NA	right lower outer quadrant	axillary lymph node dissection alone	NA	NA	nationwide children's hospital	NA	NA	NA	tcga-ao-a0jg-f15492	b37c0a82-e26c-40e9-ac60-492996cd6e5e	canonical	NA	positive	NA	3+	NA	NA	positive	modified radical mastectomy	NA	NA	NA	NA	NA	no	21	22	NA	NA	-18021	0	0	NA	NA	NA	NA
TCGA-AO-A0JJ-01A	bef7b135-a727-45e8-850a-cc4cd56c49aa	a0jj	alive	0	1887	NA	NA	NA	54	left	NA	NA	NA	left upper outer quadrant	sentinel lymph node biopsy plus axillary dissection	NA	NA	nationwide children's hospital	NA	NA	NA	tcga-ao-a0jj-f15493	0466f12c-73ba-4b3a-9794-698974812cf6	canonical	NA	positive	NA	3+	NA	NA	positive	modified radical mastectomy	NA	NA	NA	NA	NA	no	21	22	NA	NA	-19758	0	0	NA	NA	NA	NA
TCGA-AO-A0JL-01A	d5d8e76e-2f2a-49bc-ba0a-d51283611b16	a0jl	alive	0	1683	NA	NA	NA	59	left lower outer quadrant	left	NA	NA	left upper outer quadrant	axillary lymph node dissection alone	NA	NA	nationwide children's hospital	NA	NA	NA	tcga-ao-a0jl-f15495	2da970a3-1c67-4ae5-bac4-13fde30bd4d0	canonical	NA	negative	NA	NA	NA	NA	negative	modified radical mastectomy	NA	NA	NA	NA	NA	no	21	22	NA	NA	-21895	0	0	NA	NA	NA	NA
TCGA-AO-A0JM-01A	44bec761-b603-49c0-8634-f6bfe0319bb1	a0jm	alive	0	2184	NA	NA	NA	40	right lower outer quadrant	right	NA	NA	right lower inner quadrant	sentinel lymph node biopsy plus axillary dissection	NA	NA	nationwide children's hospital	NA	NA	NA	tcga-ao-a0jm-f15496	3a5ab256-1c98-41b7-a84a-3bfb46668518	canonical	NA	positive	NA	1+	NA	NA	positive	modified radical mastectomy	NA	NA	NA	NA	NA	no	21	22	NA	NA	-14653	0	0	NA	NA	NA	NA
TCGA-AO-A124-01A	b094e8b2-8ece-4b36-8025-18073a8b873c	a124	alive	0	3506	NA	NA	NA	38	NA	NA	NA	NA	left	sentinel lymph node biopsy plus axillary dissection	NA	NA	nationwide children's hospital	NA	NA	NA	tcga-ao-a124-f19395	4c248c62-b6c3-4222-aa49-af4679bd9264	canonical	NA	negative	NA	NA	NA	NA	negative	modified radical mastectomy	NA	NA	NA	NA	NA	yes	21	12	NA	NA	-14174	0	0	NA	NA	NA	NA
TCGA-AO-A125-01A	8577ffcb-242e-40e2-98d4-2831d952be34	a125	alive	0	3456	NA	NA	NA	72	left upper outer quadrant	left	NA	NA	left upper inner quadrant	sentinel node biopsy alone	NA	NA	nationwide children's hospital	NA	NA	NA	tcga-ao-a125-f19398	eb7a61a5-3724-4055-9588-907d177d46e0	canonical	NA	positive	NA	4+	NA	NA	positive	simple mastectomy	NA	NA	NA	NA	NA	yes	21	12	NA	NA	-26466	0	0	NA	NA	NA	NA
TCGA-AO-A126-01A	cc0902fd-a2fc-4327-929e-d4219e32e1d7	a126	alive	0	3307	NA	yes	no	39	right	NA	NA	NA	right upper inner quadrant	sentinel node biopsy alone	NA	NA	nationwide children's hospital	NA	NA	NA	tcga-ao-a126-f19402	07d7ba23-00a6-491e-a381-1b93bb686c33	canonical	NA	positive	NA	2+	NA	NA	positive	simple mastectomy	NA	NA	NA	NA	NA	yes	21	12	295	295	-14264	0	0	NA	NA	NA	NA
TCGA-AO-A128-01A	016caf42-4e19-4444-ab5d-6cf1e76c4afa	a128	alive	0	3248	NA	NA	NA	61	right	NA	NA	NA	right lower outer quadrant	sentinel node biopsy alone	NA	NA	nationwide children's hospital	NA	NA	NA	tcga-ao-a128-f19405	caaf9eff-2a56-4182-a1f0-115aa2cddaed	canonical	NA	negative	NA	NA	NA	NA	negative	lumpectomy	NA	NA	NA	NA	NA	yes	21	12	NA	NA	-22340	0	0	NA	NA	NA	NA
TCGA-AO-A129-01A	c70ee5e1-4703-4996-bb5c-f4cca0fb53ba	a129	alive	0	3286	NA	NA	NA	29	left	NA	NA	NA	left lower outer quadrant	axillary lymph node dissection alone	NA	NA	nationwide children's hospital	NA	NA	NA	tcga-ao-a129-f19415	c40939d7-1f54-4652-beef-94586a5f9051	canonical	NA	negative	NA	NA	NA	NA	negative	modified radical mastectomy	NA	NA	NA	NA	NA	no	21	12	NA	NA	-10898	0	0	NA	NA	NA	NA
TCGA-AO-A12A-01A	99927651-34be-4795-893a-128d8a1fdb30	a12a	alive	0	3112	NA	NA	NA	47	right	NA	NA	NA	right upper outer quadrant	sentinel lymph node biopsy plus axillary dissection	NA	NA	nationwide children's hospital	NA	NA	NA	tcga-ao-a12a-f19418	bfc6614a-a948-450e-aff8-2973c401cdf9	canonical	NA	positive	NA	4+	NA	NA	positive	modified radical mastectomy	NA	NA	NA	NA	NA	yes	21	12	NA	NA	-17420	0	0	NA	NA	NA	NA
TCGA-AO-A12B-01A	f6ed684f-ee7a-496c-80d5-6eacd494d16a	a12b	alive	0	2989	NA	NA	NA	63	right lower inner quadrant	right	NA	NA	right upper inner quadrant	sentinel node biopsy alone	NA	NA	nationwide children's hospital	NA	NA	NA	tcga-ao-a12b-f43473	3fa3f48a-1dc7-49b7-ba5c-07ab14d891f2	canonical	NA	positive	NA	4+	NA	NA	positive	simple mastectomy	NA	NA	NA	NA	NA	yes	21	22	NA	NA	-23150	0	0	NA	NA	NA	NA
TCGA-AO-A12C-01A	71626753-cc34-4731-abc0-ae188b0964e7	a12c	alive	0	2372	NA	NA	NA	42	left	NA	NA	NA	left upper outer quadrant	sentinel lymph node biopsy plus axillary dissection	NA	NA	nationwide children's hospital	NA	NA	NA	tcga-ao-a12c-f19425	c6079795-077b-4961-8c09-c9faf4b8c1a2	canonical	negative	positive	NA	2+	NA	modified radical mastectomy	positive	lumpectomy	NA	NA	NA	NA	NA	no	21	12	NA	NA	-15469	0	0	NA	NA	NA	NA
TCGA-AO-A12D-01A	2fe854b4-bac9-4801-9a1c-ee99388e8082	a12d	alive	0	2515	NA	NA	NA	43	left	NA	NA	NA	left upper outer quadrant	sentinel lymph node biopsy plus axillary dissection	NA	NA	nationwide children's hospital	NA	NA	NA	tcga-ao-a12d-f43438	497d877b-0253-4505-92fd-bd836d1444f6	canonical	NA	negative	NA	NA	NA	NA	negative	modified radical mastectomy	NA	NA	NA	NA	NA	yes	21	21	NA	NA	-15774	0	0	NA	NA	NA	NA
TCGA-AO-A12E-01A	2cbeadff-a8a3-4787-9d4e-f6b74c3ab5d9	a12e	alive	0	2142	NA	NA	NA	51	right lower outer quadrant	right	NA	NA	right lower inner quadrant	axillary lymph node dissection alone	NA	NA	nationwide children's hospital	NA	NA	NA	tcga-ao-a12e-f19431	1ca8ff89-a5c5-4d7a-b043-f371a82cea7c	canonical	NA	positive	NA	2+	NA	NA	positive	modified radical mastectomy	NA	NA	NA	NA	NA	yes	21	12	NA	NA	-18721	0	0	NA	NA	NA	NA
TCGA-AO-A12F-01A	495f9eda-b9be-4eef-bae1-766a4bfbd68e	a12f	alive	0	1842	NA	NA	NA	36	right	NA	NA	NA	right upper outer quadrant	sentinel node biopsy alone	NA	NA	nationwide children's hospital	NA	NA	NA	tcga-ao-a12f-f19434	20f415f8-aac1-42cf-b61f-f8035ead23b8	canonical	NA	negative	NA	NA	NA	NA	negative	simple mastectomy	NA	NA	NA	NA	NA	yes	21	12	NA	NA	-13409	0	0	NA	NA	NA	NA
TCGA-AO-A12G-01A	58c56d4b-3f85-4aad-a779-5f9e1791677d	a12g	alive	0	1639	NA	NA	NA	75	right	NA	NA	NA	right upper outer quadrant	sentinel node biopsy alone	NA	NA	nationwide children's hospital	NA	NA	NA	tcga-ao-a12g-f19448	7e5b69f5-8504-4c78-8405-ac9d2989c122	canonical	NA	positive	NA	2+	NA	NA	positive	simple mastectomy	NA	NA	NA	NA	NA	yes	21	16	NA	NA	-27705	0	0	NA	NA	NA	NA
TCGA-AO-A12H-01A	b5b99291-507e-4b68-a039-9a0f571f55df	a12h	alive	0	1234	NA	NA	NA	69	right	NA	NA	NA	right upper outer quadrant	sentinel node biopsy alone	NA	NA	nationwide children's hospital	NA	NA	NA	tcga-ao-a12h-f19451	1f5d7f28-3872-40b5-bd20-1e1e6418630d	canonical	NA	positive	NA	2+	NA	NA	positive	simple mastectomy	NA	NA	NA	NA	NA	yes	21	12	NA	NA	-25515	0	0	NA	NA	NA	NA
TCGA-AO-A1KO-01A	c25898b4-eb33-42f4-bf3f-bf532a929e7d	a1ko	alive	0	622	NA	NA	NA	46	left lower outer quadrant	left	NA	NA	left upper outer quadrant	sentinel lymph node biopsy plus axillary dissection	NA	NA	nationwide children's hospital	NA	NA	NA	tcga-ao-a1ko-f20630	345f758b-4506-48dc-87a7-25b67862b7dc	canonical	NA	positive	4 point scale	4+	4 point scale	NA	positive	simple mastectomy	NA	NA	NA	NA	NA	yes	21	20	NA	NA	-16817	0	0	NA	NA	no	NA
TCGA-AO-A1KP-01A	3aaabc62-f5a4-4025-9b29-5adf82c86c84	a1kp	alive	0	2953	NA	NA	NA	77	left lower outer quadrant	left	NA	NA	left lower inner quadrant	sentinel lymph node biopsy plus axillary dissection	NA	NA	nationwide children's hospital	NA	NA	NA	tcga-ao-a1kp-f21774	57be50c2-0db3-4688-8591-106b44818ca6	canonical	NA	positive	4 point scale	4+	4 point scale	NA	positive	simple mastectomy	NA	NA	NA	NA	NA	yes	21	20	NA	NA	-28247	0	0	NA	NA	no	NA
TCGA-AO-A1KQ-01A	d2219a3f-4c55-4dee-9b08-c6f330dd1acf	a1kq	alive	0	1882	NA	NA	NA	84	left upper outer quadrant	left lower inner quadrant	left	NA	left upper inner quadrant	sentinel lymph node biopsy plus axillary dissection	NA	NA	nationwide children's hospital	NA	NA	NA	tcga-ao-a1kq-f21775	db04403e-1473-4bbc-b665-0103f9db2608	canonical	NA	positive	4 point scale	3+	4 point scale	NA	positive	modified radical mastectomy	NA	NA	NA	NA	NA	no	21	20	NA	NA	-30859	0	0	NA	NA	no	NA
TCGA-AO-A1KR-01A	b7f74ae1-6f58-447c-be50-a7666eb19d9a	a1kr	alive	0	2513	NA	NA	NA	51	NA	NA	NA	NA	right upper inner quadrant	sentinel node biopsy alone	NA	NA	nationwide children's hospital	NA	NA	NA	tcga-ao-a1kr-f21768	72013907-4371-4723-af90-55c5bc120d64	canonical	NA	negative	4 point scale	NA	3 point scale	NA	negative	simple mastectomy	NA	NA	NA	NA	NA	yes	21	21	NA	NA	-18900	0	0	NA	NA	no	NA
TCGA-AO-A1KS-01A	bb8d42d3-ad65-4d88-ae1d-f9aadfc7962d	a1ks	alive	0	350	NA	NA	NA	69	left lower outer quadrant	left	NA	NA	left lower inner quadrant	sentinel node biopsy alone	NA	NA	nationwide children's hospital	NA	NA	NA	tcga-ao-a1ks-f21777	507bcf20-7ba4-4c69-9d6f-41883512fad1	canonical	NA	positive	4 point scale	2+	4 point scale	NA	positive	lumpectomy	NA	NA	NA	NA	NA	yes	21	20	NA	NA	-25230	0	0	NA	NA	no	NA
TCGA-AQ-A04H-01A	83f943c7-3975-4b4f-985d-9c057741793b	a04h	alive	0	754	NA	NA	NA	61	NA	NA	NA	NA	left lower inner quadrant	axillary lymph node dissection alone	NA	NA	nationwide children's hospital	NA	NA	NA	tcga-aq-a04h-f35322	e5147793-faa6-44c5-be7e-d11656cd8119	canonical	NA	positive	NA	NA	NA	NA	positive	modified radical mastectomy	NA	NA	NA	NA	NA	no	21	24	NA	NA	-22539	0	0	NA	NA	NA	NA
TCGA-AQ-A04J-01A	9938ce5c-e74e-446e-a932-f096f85cc3b1	a04j	alive	0	819	NA	NA	NA	45	NA	NA	NA	NA	right upper outer quadrant	axillary lymph node dissection alone	NA	NA	nationwide children's hospital	NA	NA	NA	tcga-aq-a04j-f21740	09fc391f-4113-4c17-8bda-25158626688e	canonical	NA	negative	NA	0	NA	NA	negative	simple mastectomy	NA	NA	NA	NA	NA	no	21	20	NA	NA	-16615	0	0	NA	NA	NA	NA
TCGA-AQ-A04L-01A	78582fbc-dcc7-48ae-9f95-5271c9bc5b72	a04l	alive	0	3957	NA	NA	NA	48	NA	NA	NA	NA	right	sentinel node biopsy alone	NA	NA	nationwide children's hospital	NA	NA	NA	tcga-aq-a04l-f35324	34c3837d-dc46-481c-b853-6e2bd80c7466	canonical	NA	positive	NA	NA	NA	NA	negative	modified radical mastectomy	NA	NA	NA	NA	NA	no	21	24	NA	NA	-17759	0	0	NA	NA	NA	NA
TCGA-AQ-A1H2-01A	4d120899-9a80-4736-b097-285e9e261bcb	a1h2	alive	0	475	NA	NA	NA	84	NA	NA	NA	NA	right upper outer quadrant	axillary lymph node dissection alone	NA	NA	nationwide children's hospital	NA	NA	NA	tcga-aq-a1h2-f19896	ba3554e9-f416-4973-b66a-513126bbbb98	canonical	NA	positive	NA	NA	NA	NA	positive	modified radical mastectomy	NA	NA	NA	NA	NA	no	21	3	NA	NA	-30958	0	0	NA	NA	no	NA
TCGA-AQ-A1H3-01A	82ec33dd-e783-4c74-9a87-797a699e11df	a1h3	alive	0	989	NA	NA	NA	49	NA	NA	NA	NA	right upper outer quadrant	sentinel lymph node biopsy plus axillary dissection	NA	NA	nationwide children's hospital	NA	NA	NA	tcga-aq-a1h3-f50661	98a7ede4-cb1f-4a84-ad74-e1f4c96abf53	canonical	NA	positive	NA	NA	NA	NA	positive	modified radical mastectomy	NA	NA	NA	NA	NA	no	21	28	NA	NA	-18177	0	0	NA	NA	no	NA
TCGA-AR-A0TP-01A	ab89bb2e-da84-4116-a8cd-49aad7bbfd4d	a0tp	alive	0	4275	NA	NA	NA	43	NA	NA	NA	NA	left upper inner quadrant	sentinel lymph node biopsy plus axillary dissection	NA	NA	nationwide children's hospital	NA	NA	NA	tcga-ar-a0tp-f71715	557ae19d-df36-4f96-ac06-278afcd2b451	canonical	NA	positive	NA	NA	NA	NA	negative	other	NA	NA	NA	NA	NA	yes	21	30	NA	NA	-15812	0	0	NA	NA	NA	NA
TCGA-AR-A0TQ-01A	5dc1bee9-c44d-4fdc-9ae5-83426c4d6880	a0tq	alive	0	2991	NA	NA	NA	27	NA	NA	NA	NA	right upper outer quadrant	axillary lymph node dissection alone	NA	NA	nationwide children's hospital	NA	NA	NA	tcga-ar-a0tq-f71717	1fc3693e-328c-44d8-af78-067700617492	canonical	NA	positive	NA	NA	NA	NA	negative	simple mastectomy	NA	NA	NA	NA	NA	no	21	30	NA	NA	-9873	0	0	NA	NA	NA	NA
TCGA-AR-A0TR-01A	d1703dbd-5c93-4cf2-a4d1-0d90640882bd	a0tr	dead	160	160	NA	NA	NA	68	NA	NA	NA	NA	left	sentinel lymph node biopsy plus axillary dissection	NA	NA	nationwide children's hospital	NA	NA	NA	tcga-ar-a0tr-f18771	c7428c57-68c1-4574-81ba-167aaa258024	canonical	NA	positive	NA	NA	NA	NA	positive	modified radical mastectomy	NA	NA	NA	NA	NA	no	21	12	NA	NA	-25190	0	0	NA	NA	NA	NA
TCGA-AR-A0TS-01A	972447aa-4332-47e7-bddd-2eb699dbb664	a0ts	alive	0	2558	NA	NA	NA	46	NA	NA	NA	NA	right	sentinel lymph node biopsy plus axillary dissection	NA	NA	nationwide children's hospital	NA	NA	NA	tcga-ar-a0ts-f71730	94425f1e-c3c6-4ef7-b1cd-aa1fbaf14fbe	canonical	NA	negative	NA	0	NA	NA	negative	lumpectomy	NA	NA	NA	NA	NA	yes	21	30	NA	NA	-17141	0	0	NA	NA	NA	NA
TCGA-AR-A0TT-01A	13ca97a1-75bb-4a49-b8c3-181e5b2c9e86	a0tt	alive	0	3316	NA	NA	NA	53	NA	NA	NA	NA	right upper outer quadrant	sentinel lymph node biopsy plus axillary dissection	NA	NA	nationwide children's hospital	NA	NA	NA	tcga-ar-a0tt-f71737	f362532a-12f9-4fc6-99ed-e2aa217cb5c1	canonical	NA	positive	NA	0	NA	NA	negative	other	NA	NA	NA	NA	NA	NA	21	30	NA	NA	-19679	0	0	NA	NA	NA	NA
TCGA-AR-A0TU-01A	dfe6db17-cf45-488e-bd3c-b8433d7343ca	a0tu	alive	0	709	NA	NA	NA	35	NA	NA	NA	NA	right lower outer quadrant	sentinel lymph node biopsy plus axillary dissection	NA	NA	nationwide children's hospital	NA	NA	NA	tcga-ar-a0tu-f71735	3bbb4daf-8684-4ae4-a54b-691a404d0a5d	canonical	NA	negative	NA	0	NA	NA	negative	simple mastectomy	NA	NA	NA	NA	NA	yes	21	30	NA	NA	-13039	0	0	NA	NA	NA	NA
TCGA-AR-A0TV-01A	6439621e-da61-4723-91cc-c5d87d0a4abc	a0tv	alive	0	2288	NA	NA	NA	66	NA	NA	NA	NA	left upper outer quadrant	sentinel lymph node biopsy plus axillary dissection	NA	NA	nationwide children's hospital	NA	NA	NA	tcga-ar-a0tv-f71734	7ede43d9-4f69-47cc-86a2-583c68ecc646	canonical	NA	positive	NA	NA	NA	NA	positive	simple mastectomy	NA	NA	NA	NA	NA	yes	21	30	NA	NA	-24279	0	0	NA	NA	NA	NA
TCGA-AR-A0TW-01A	8da3d6cf-381b-4d1b-93fa-41fd9d2b2e66	a0tw	alive	0	3009	NA	NA	NA	50	right lower outer quadrant	NA	NA	NA	right upper outer quadrant	NA	NA	NA	nationwide children's hospital	NA	NA	NA	tcga-ar-a0tw-f49464	879d832d-c3f4-45c1-bae3-73fe8d28964b	canonical	NA	positive	NA	NA	NA	NA	positive	modified radical mastectomy	NA	NA	NA	NA	NA	NA	21	2	NA	NA	-18263	0	0	NA	NA	NA	NA
TCGA-AR-A0TX-01A	c364e81c-eb1e-4870-ab37-9c661f5f2e3d	a0tx	alive	0	1972	NA	NA	NA	64	NA	NA	NA	NA	left upper outer quadrant	axillary lymph node dissection alone	NA	NA	nationwide children's hospital	NA	NA	NA	tcga-ar-a0tx-f63939	25a1db00-f68e-4bab-bffd-b8ff97587207	canonical	NA	positive	NA	NA	NA	NA	positive	other	NA	NA	NA	NA	NA	no	21	21	NA	NA	-23653	0	0	NA	NA	NA	NA
TCGA-AR-A0TY-01A	da1c58a7-c6bd-47d9-95c2-8d2ac70e20e4	a0ty	dead	1699	1699	NA	NA	NA	54	NA	NA	NA	NA	right upper outer quadrant	sentinel lymph node biopsy plus axillary dissection	NA	NA	nationwide children's hospital	NA	NA	NA	tcga-ar-a0ty-f18561	78c812fe-1e96-434a-aa4b-15bf524153a4	canonical	NA	positive	NA	0	NA	NA	negative	simple mastectomy	NA	NA	NA	NA	NA	yes	21	15	NA	NA	-19836	0	0	NA	NA	NA	NA
TCGA-AR-A0TZ-01A	c7c34fd9-3021-45b7-b6ff-30b4196585a8	a0tz	dead	3262	3262	NA	NA	NA	43	NA	NA	NA	NA	left upper outer quadrant	NA	NA	NA	nationwide children's hospital	NA	NA	NA	tcga-ar-a0tz-f49471	07a8c3d6-9b1a-42f7-8ad6-b5fd24a8cf52	canonical	NA	positive	NA	NA	NA	NA	positive	modified radical mastectomy	NA	NA	NA	NA	NA	NA	21	2	NA	NA	-15720	0	0	NA	NA	NA	NA
TCGA-AR-A0U0-01A	e3c336f5-c32f-4c5d-81fb-e2408ae145b2	a0u0	alive	0	1988	NA	NA	NA	73	NA	NA	NA	NA	left lower inner quadrant	sentinel lymph node biopsy plus axillary dissection	NA	NA	nationwide children's hospital	NA	NA	NA	tcga-ar-a0u0-f65068	795958ad-2e03-4480-b9e3-2edf04451128	canonical	NA	negative	NA	0	NA	NA	negative	simple mastectomy	NA	NA	NA	NA	NA	yes	21	18	NA	NA	-26993	0	0	NA	NA	NA	NA
TCGA-AR-A0U1-01A	17d9e646-6ab3-40b3-a0bc-2c834d3c3213	a0u1	alive	0	4052	NA	NA	NA	36	NA	NA	NA	NA	left upper outer quadrant	sentinel lymph node biopsy plus axillary dissection	NA	NA	nationwide children's hospital	NA	NA	NA	tcga-ar-a0u1-f71729	055e3024-866f-4e2a-ba13-31e14c4dec7f	canonical	NA	negative	NA	0	NA	NA	negative	other	NA	NA	NA	NA	NA	no	21	30	NA	NA	-13467	0	0	NA	NA	NA	NA
TCGA-AR-A0U2-01A	9ad603dc-3fd0-44f5-ae4e-64eeb1ae8d6d	a0u2	dead	2551	2551	NA	NA	NA	47	NA	NA	NA	NA	left lower outer quadrant	axillary lymph node dissection alone	NA	NA	nationwide children's hospital	NA	NA	NA	tcga-ar-a0u2-f18483	c7f93bf3-479c-4ce3-ac96-debdbe56649c	canonical	negative	positive	NA	NA	NA	NA	positive	modified radical mastectomy	NA	NA	NA	NA	NA	no	21	15	NA	NA	-17390	0	0	NA	NA	NA	NA
TCGA-AR-A0U3-01A	c5f00132-1c6b-4337-af6f-596c652665cc	a0u3	alive	0	4080	NA	NA	NA	59	left upper outer quadrant	NA	NA	NA	left upper inner quadrant	sentinel lymph node biopsy plus axillary dissection	NA	NA	nationwide children's hospital	NA	NA	NA	tcga-ar-a0u3-f71712	679643aa-e34b-4b54-b79a-c34eccf1dd86	canonical	NA	positive	NA	NA	NA	NA	positive	other	NA	NA	NA	NA	NA	no	21	30	NA	NA	-21755	0	0	NA	NA	NA	NA
TCGA-AR-A0U4-01A	71f97b63-c970-44ee-98c2-e02e663d5a40	a0u4	alive	0	3261	NA	NA	NA	54	NA	NA	NA	NA	left upper outer quadrant	sentinel lymph node biopsy plus axillary dissection	NA	NA	nationwide children's hospital	NA	NA	NA	tcga-ar-a0u4-f71739	2e6cb219-767b-4d70-8ed4-ca0032345759	canonical	NA	negative	NA	0	NA	NA	negative	simple mastectomy	NA	NA	NA	NA	NA	no	21	30	NA	NA	-19729	0	0	NA	NA	NA	NA
TCGA-AR-A1AH-01A	a6e11b30-3ae8-4dd1-b04c-a730c6a79746	a1ah	alive	0	3807	NA	NA	NA	51	NA	NA	NA	NA	right upper inner quadrant	axillary lymph node dissection alone	NA	NA	nationwide children's hospital	NA	NA	NA	tcga-ar-a1ah-f69267	39f31d97-dbef-45b5-bf5a-73b8859724b9	canonical	NA	positive	NA	NA	NA	NA	negative	other	NA	NA	NA	NA	NA	NA	21	31	NA	NA	-18991	0	0	NA	NA	NA	NA
TCGA-AR-A1AI-01A	9848307d-1bd5-40c1-b655-a33297aaf74f	a1ai	alive	0	3296	NA	NA	NA	47	NA	NA	NA	NA	left upper outer quadrant	sentinel lymph node biopsy plus axillary dissection	NA	NA	nationwide children's hospital	NA	NA	NA	tcga-ar-a1ai-f69268	133635bc-06cc-4ddd-a045-698c61beb38c	canonical	NA	negative	NA	NA	NA	NA	negative	simple mastectomy	NA	NA	NA	NA	NA	yes	21	31	NA	NA	-17229	0	0	NA	NA	NA	NA
TCGA-AR-A1AJ-01A	23e7a78a-1d56-4ad1-9bb4-72ec0178aff2	a1aj	alive	0	3072	NA	NA	NA	83	NA	NA	NA	NA	right	sentinel lymph node biopsy plus axillary dissection	NA	NA	nationwide children's hospital	NA	NA	NA	tcga-ar-a1aj-f69269	e2c23026-41e4-4841-8697-7cccd8c1e45b	canonical	NA	positive	NA	NA	NA	NA	negative	other	NA	NA	NA	NA	NA	yes	21	31	NA	NA	-30489	0	0	NA	NA	NA	NA
TCGA-AR-A1AK-01A	94b03e1d-50ec-4680-bffd-7086d1536ff2	a1ak	alive	0	3159	NA	NA	NA	70	NA	NA	NA	NA	right	sentinel lymph node biopsy plus axillary dissection	NA	NA	nationwide children's hospital	NA	NA	NA	tcga-ar-a1ak-f69271	4d10493e-351e-498f-a607-d7e32c755d8a	canonical	NA	positive	NA	NA	NA	NA	positive	simple mastectomy	NA	NA	NA	NA	NA	yes	21	31	NA	NA	-25825	0	0	NA	NA	NA	NA
TCGA-AR-A1AL-01A	1f99e4d4-4e8b-4cc1-a129-227a2a82780e	a1al	alive	0	2971	NA	NA	NA	60	left upper outer quadrant	NA	NA	NA	left upper inner quadrant	sentinel lymph node biopsy plus axillary dissection	NA	NA	nationwide children's hospital	NA	NA	NA	tcga-ar-a1al-f69272	578e2fc1-a2d0-4e95-9683-5ca06ad1313d	canonical	NA	positive	NA	NA	NA	NA	positive	simple mastectomy	NA	NA	NA	NA	NA	yes	21	31	NA	NA	-22023	0	0	NA	NA	NA	NA
TCGA-AR-A1AN-01A	43029932-feb0-4658-97fa-645c1e775009	a1an	alive	0	2920	NA	NA	NA	46	NA	NA	NA	NA	right upper outer quadrant	sentinel lymph node biopsy plus axillary dissection	NA	NA	nationwide children's hospital	NA	NA	NA	tcga-ar-a1an-f69273	d4512f43-4a80-4ead-93cf-973446aa72ba	canonical	NA	positive	NA	NA	NA	NA	positive	other	NA	NA	NA	NA	NA	yes	21	31	NA	NA	-16974	0	0	NA	NA	NA	NA
TCGA-AR-A1AO-01A	623befd6-0ca4-4a6c-9cf5-d9385c3b718f	a1ao	alive	0	2618	NA	NA	NA	47	NA	NA	NA	NA	left upper inner quadrant	sentinel lymph node biopsy plus axillary dissection	NA	NA	nationwide children's hospital	NA	NA	NA	tcga-ar-a1ao-f69274	c5985991-91b3-4b10-bff1-93daccad48f5	canonical	NA	positive	NA	NA	NA	NA	negative	other	NA	NA	NA	NA	NA	yes	21	31	NA	NA	-17332	0	0	NA	NA	NA	NA
TCGA-AR-A1AP-01A	9495f029-9882-4c9b-a557-b3aec9e91698	a1ap	alive	0	2856	NA	NA	NA	80	NA	NA	NA	NA	left upper outer quadrant	sentinel lymph node biopsy plus axillary dissection	NA	NA	nationwide children's hospital	NA	NA	NA	tcga-ar-a1ap-f69275	7f6ffb16-466b-42bb-bfb6-05059b1c63f7	canonical	negative	positive	NA	NA	NA	mastectomy nos	positive	other	NA	NA	NA	NA	NA	yes	21	31	NA	NA	-29406	0	0	NA	NA	NA	NA
TCGA-AR-A1AQ-01A	98e0b4de-52fc-4945-9bf5-11e29368f939	a1aq	alive	0	3021	NA	NA	NA	49	right upper outer quadrant	NA	NA	NA	right upper inner quadrant	sentinel lymph node biopsy plus axillary dissection	NA	NA	nationwide children's hospital	NA	NA	NA	tcga-ar-a1aq-f69276	a25be870-3a72-431a-a4a5-2b9c5fdad5ba	canonical	NA	negative	NA	NA	NA	NA	negative	other	NA	NA	NA	NA	NA	yes	21	31	NA	NA	-18109	0	0	NA	NA	NA	NA
TCGA-AR-A1AS-01A	7d681cc6-689d-41c8-9e84-e13733089ec9	a1as	alive	0	1150	NA	NA	NA	54	NA	NA	NA	NA	left upper inner quadrant	axillary lymph node dissection alone	NA	NA	nationwide children's hospital	NA	NA	NA	tcga-ar-a1as-f49470	86521e70-553e-442a-bb81-f0e66aefae1b	canonical	NA	positive	NA	NA	NA	NA	positive	other	NA	NA	NA	NA	NA	NA	21	2	NA	NA	-20028	0	0	NA	NA	NA	NA
TCGA-AR-A1AT-01A	4d26dada-5eb7-4d4e-8eb8-f5465c5c3428	a1at	dead	1272	1272	NA	NA	NA	62	NA	NA	NA	NA	left upper outer quadrant	sentinel lymph node biopsy plus axillary dissection	NA	NA	nationwide children's hospital	NA	NA	NA	tcga-ar-a1at-f22148	d7b56de8-a5e4-4524-80b2-c2260f0a0054	canonical	NA	positive	NA	NA	NA	NA	positive	other	NA	NA	NA	NA	NA	yes	21	1	NA	NA	-22942	0	0	NA	NA	NA	NA
TCGA-AR-A1AU-01A	36220587-1c1c-4f92-b177-3b2155e7e273	a1au	alive	0	2868	NA	NA	NA	39	right upper outer quadrant	NA	NA	NA	right upper inner quadrant	sentinel lymph node biopsy plus axillary dissection	NA	NA	nationwide children's hospital	NA	NA	NA	tcga-ar-a1au-f71744	ca3498db-9604-4bde-90a0-b890e45357a9	canonical	NA	positive	NA	NA	NA	NA	positive	other	NA	NA	NA	NA	NA	NA	21	30	NA	NA	-14564	0	0	NA	NA	NA	NA
TCGA-AR-A1AV-01A	daf62b56-6dd2-4ab7-adaa-f296bb86a0a5	a1av	alive	0	1864	NA	NA	NA	68	NA	NA	NA	NA	left	axillary lymph node dissection alone	NA	NA	nationwide children's hospital	NA	NA	NA	tcga-ar-a1av-f49475	12ee7c6d-9ba2-461a-bd10-888fcefe23b5	canonical	NA	positive	NA	NA	NA	NA	positive	modified radical mastectomy	NA	NA	NA	NA	NA	NA	21	2	NA	NA	-24875	0	0	NA	NA	NA	NA
TCGA-AR-A1AW-01A	a12fd22a-7f84-4b6e-b6d8-012e38eb73d7	a1aw	alive	0	2632	NA	NA	NA	65	NA	NA	NA	NA	left upper inner quadrant	sentinel lymph node biopsy plus axillary dissection	NA	NA	nationwide children's hospital	NA	NA	NA	tcga-ar-a1aw-f71714	96d8ca37-5732-42d2-9984-18cad787048f	canonical	NA	positive	NA	NA	NA	NA	positive	lumpectomy	NA	NA	NA	NA	NA	yes	21	30	NA	NA	-23855	0	0	NA	NA	NA	NA
TCGA-AR-A1AX-01A	f72c1d69-da35-459f-8542-59bfd6c09c23	a1ax	alive	0	2629	NA	NA	NA	64	left upper outer quadrant	NA	NA	NA	left upper inner quadrant	sentinel lymph node biopsy plus axillary dissection	NA	NA	nationwide children's hospital	NA	NA	NA	tcga-ar-a1ax-f71720	1a4724bc-bf17-4be0-b7a2-9bd4e3960306	canonical	NA	positive	NA	NA	NA	NA	positive	other	NA	NA	NA	NA	NA	yes	21	30	NA	NA	-23507	0	0	NA	NA	NA	NA
TCGA-AR-A1AY-01A	5fd9552a-c742-4388-940d-295d1107ae00	a1ay	alive	0	1026	NA	NA	NA	65	NA	NA	NA	NA	left upper outer quadrant	sentinel lymph node biopsy plus axillary dissection	NA	NA	nationwide children's hospital	NA	NA	NA	tcga-ar-a1ay-f49482	e5648a84-5439-451b-a1fb-234da91b8f76	canonical	NA	negative	NA	NA	NA	NA	negative	other	NA	NA	NA	NA	NA	yes	21	2	NA	NA	-23927	0	0	NA	NA	NA	NA
TCGA-AR-A24H-01A	6f89509c-f802-482e-b4da-94553aa76fe9	a24h	alive	0	4894	NA	NA	NA	65	right lower outer quadrant	NA	NA	NA	right lower inner quadrant	sentinel lymph node biopsy plus axillary dissection	NA	NA	nationwide children's hospital	NA	NA	NA	tcga-ar-a24h-f65797	7bba9594-4a67-4a39-9664-d97928d1413f	canonical	NA	positive	NA	NA	NA	NA	positive	other	NA	NA	NA	NA	NA	NA	21	30	NA	NA	-24046	0	0	NA	NA	NA	NA
TCGA-AR-A24K-01A	599c3701-df7a-4a75-a347-fa9b510dd242	a24k	alive	0	1548	NA	NA	NA	46	NA	NA	NA	NA	left upper outer quadrant	sentinel lymph node biopsy plus axillary dissection	NA	NA	nationwide children's hospital	NA	NA	NA	tcga-ar-a24k-f49485	4d12da3e-be3e-4324-a4d9-7006e014ca9e	canonical	NA	positive	NA	NA	NA	NA	positive	other	NA	NA	NA	NA	NA	yes	21	2	NA	NA	-16961	0	0	NA	NA	NA	NA
TCGA-AR-A24L-01A	de646f6a-6d50-4be2-b3cd-f17554b234df	a24l	dead	2866	2866	NA	NA	NA	26	NA	NA	NA	NA	right	sentinel lymph node biopsy plus axillary dissection	NA	NA	nationwide children's hospital	NA	NA	NA	tcga-ar-a24l-f49488	98a5dd07-6036-40e1-ae50-9958b67de1ef	canonical	NA	positive	NA	NA	NA	NA	positive	other	NA	NA	NA	NA	NA	NA	21	2	NA	NA	-9706	0	0	NA	NA	NA	NA
TCGA-AR-A24M-01A	aa30ac3d-4216-45dd-a314-1ae192fafcb2	a24m	alive	0	3660	NA	NA	NA	38	NA	NA	NA	NA	left upper outer quadrant	sentinel lymph node biopsy plus axillary dissection	NA	NA	nationwide children's hospital	NA	NA	NA	tcga-ar-a24m-f71732	d6cb81e1-ae9d-4a1c-8e40-6e68f4b6936b	canonical	NA	positive	NA	NA	NA	NA	positive	other	NA	NA	NA	NA	NA	NA	21	30	NA	NA	-14119	0	0	NA	NA	NA	NA
TCGA-AR-A24N-01A	30047d32-0833-4aca-98d1-3b9ab7122863	a24n	alive	0	3035	NA	NA	NA	54	NA	NA	NA	NA	left upper inner quadrant	sentinel lymph node biopsy plus axillary dissection	NA	NA	nationwide children's hospital	NA	NA	NA	tcga-ar-a24n-f71723	5a3c20c7-dc2f-4027-8996-da5a07981e0e	canonical	NA	positive	NA	NA	NA	NA	positive	simple mastectomy	NA	NA	NA	NA	NA	yes	21	30	NA	NA	-19989	0	0	NA	NA	NA	NA
TCGA-AR-A24O-01A	125b0a9a-6cbe-4207-9178-e7ff03487e87	a24o	alive	0	3607	NA	NA	NA	43	NA	NA	NA	NA	left	NA	NA	NA	nationwide children's hospital	NA	NA	NA	tcga-ar-a24o-f71713	e72f8fee-ed75-4bd3-9257-cc47c1d1bd62	canonical	negative	positive	NA	NA	NA	mastectomy nos	positive	modified radical mastectomy	NA	NA	NA	NA	NA	NA	21	30	NA	NA	-15977	0	0	NA	NA	NA	NA
TCGA-AR-A24P-01A	d1fd8ed2-be13-4272-b31e-df86911db3b1	a24p	alive	0	84	NA	NA	NA	47	NA	NA	NA	NA	left upper outer quadrant	sentinel lymph node biopsy plus axillary dissection	NA	NA	nationwide children's hospital	NA	NA	NA	tcga-ar-a24p-f31403	fd010a17-3fac-4dbb-bd62-a3a5c0361049	canonical	NA	positive	NA	NA	NA	NA	positive	other	NA	NA	NA	NA	NA	yes	21	2	NA	NA	-17490	0	0	NA	NA	NA	NA
TCGA-AR-A24Q-01A	28e9048a-e540-42de-a1f4-4ef894fccc4c	a24q	alive	0	3172	NA	NA	NA	49	NA	NA	NA	NA	left upper inner quadrant	sentinel lymph node biopsy plus axillary dissection	NA	NA	nationwide children's hospital	NA	NA	NA	tcga-ar-a24q-f65802	4516b9c5-d979-4a2d-837c-5e9079faad42	canonical	NA	positive	NA	NA	NA	NA	negative	simple mastectomy	NA	NA	NA	NA	NA	NA	21	30	NA	NA	-18084	0	0	NA	NA	NA	NA
TCGA-AR-A24R-01A	db62d9c7-8343-4771-84fc-146d2e307bb8	a24r	alive	0	3430	NA	NA	NA	45	right upper outer quadrant	NA	NA	NA	right upper inner quadrant	sentinel lymph node biopsy plus axillary dissection	NA	NA	nationwide children's hospital	NA	NA	NA	tcga-ar-a24r-f71731	20cd927d-ea75-4b4e-9695-06932a02a418	canonical	NA	positive	NA	NA	NA	NA	positive	other	NA	NA	NA	NA	NA	NA	21	30	NA	NA	-16642	0	0	NA	NA	NA	NA
TCGA-AR-A24S-01A	074e8b06-3929-4896-9263-3b80ad6a355b	a24s	alive	0	2976	NA	NA	NA	61	NA	NA	NA	NA	right lower outer quadrant	sentinel lymph node biopsy plus axillary dissection	NA	NA	nationwide children's hospital	NA	NA	NA	tcga-ar-a24s-f31496	c02a0731-b37f-4a25-87c8-c4bae202d900	canonical	NA	positive	NA	NA	NA	NA	positive	other	NA	NA	NA	NA	NA	yes	21	4	NA	NA	-22587	0	0	NA	NA	NA	NA
TCGA-AR-A24T-01A	9e3de467-fb0d-4021-89f8-b34968a7c7bc	a24t	alive	0	3202	NA	NA	NA	46	NA	NA	NA	NA	right upper outer quadrant	sentinel lymph node biopsy plus axillary dissection	NA	NA	nationwide children's hospital	NA	NA	NA	tcga-ar-a24t-f71728	37fe3d8f-859f-4a8d-9aa3-443c80674854	canonical	NA	positive	NA	NA	NA	NA	positive	simple mastectomy	NA	NA	NA	NA	NA	NA	21	30	NA	NA	-17135	0	0	NA	NA	NA	NA
TCGA-AR-A24U-01A	241fffc8-4250-4cfa-b2e7-e68c33ae07dc	a24u	alive	0	3128	NA	NA	NA	47	left lower outer quadrant	NA	NA	NA	left upper outer quadrant	sentinel lymph node biopsy plus axillary dissection	NA	NA	nationwide children's hospital	NA	NA	NA	tcga-ar-a24u-f71738	59a7e2d3-3110-4843-96b2-af1e57b018d9	canonical	negative	negative	NA	NA	NA	mastectomy nos	negative	simple mastectomy	NA	NA	NA	NA	NA	NA	21	30	NA	NA	-17523	0	0	NA	NA	NA	NA
TCGA-AR-A24V-01A	3cb06c7a-f2a8-448b-91a8-dd201bbf2ddd	a24v	alive	0	3203	NA	NA	NA	52	NA	NA	NA	NA	right upper outer quadrant	sentinel lymph node biopsy plus axillary dissection	NA	NA	nationwide children's hospital	NA	NA	NA	tcga-ar-a24v-f71740	5447afa3-8009-4d99-80f1-bd69e437431f	canonical	NA	positive	NA	NA	NA	NA	positive	other	NA	NA	NA	NA	NA	yes	21	30	NA	NA	-19027	0	0	NA	NA	NA	NA
TCGA-AR-A24W-01A	67526f5a-3a30-45b2-aeab-2b21a855063e	a24w	alive	0	1550	NA	NA	NA	55	NA	NA	NA	NA	right lower inner quadrant	sentinel lymph node biopsy plus axillary dissection	NA	NA	nationwide children's hospital	NA	NA	NA	tcga-ar-a24w-f49476	7b6e8320-51fe-49bf-a68a-6ab693d91dd2	canonical	NA	positive	NA	NA	NA	NA	positive	other	NA	NA	NA	NA	NA	NA	21	2	NA	NA	-20123	0	0	NA	NA	NA	NA
TCGA-AR-A24X-01A	491d5ebb-e9ab-4b17-acb8-630ff9fef0f2	a24x	alive	0	3004	NA	NA	NA	52	NA	NA	NA	NA	right upper inner quadrant	sentinel lymph node biopsy plus axillary dissection	NA	NA	nationwide children's hospital	NA	NA	NA	tcga-ar-a24x-f71741	d8fb489c-76df-4d1d-9d2a-3db704f0e1e3	canonical	NA	positive	NA	NA	NA	NA	positive	simple mastectomy	NA	NA	NA	NA	NA	yes	21	30	NA	NA	-19030	0	0	NA	NA	NA	NA
TCGA-AR-A24Z-01A	9fefbe7c-f66a-4940-843e-285cb7b392c1	a24z	alive	0	3001	NA	NA	NA	57	NA	NA	NA	NA	left upper outer quadrant	sentinel lymph node biopsy plus axillary dissection	NA	NA	nationwide children's hospital	NA	NA	NA	tcga-ar-a24z-f71743	4f1b7892-51a0-4396-8b71-2847ee22cbef	canonical	NA	positive	NA	NA	NA	NA	positive	other	NA	NA	NA	NA	NA	yes	21	30	NA	NA	-20900	0	0	NA	NA	NA	NA
TCGA-AR-A250-01A	a0963e93-b63e-4de2-86c1-81302e271d3e	a250	alive	0	2707	NA	NA	NA	58	NA	NA	NA	NA	left upper outer quadrant	sentinel lymph node biopsy plus axillary dissection	NA	NA	nationwide children's hospital	NA	NA	NA	tcga-ar-a250-f65794	34c8a220-2c5d-4707-85ef-7585564fb291	canonical	negative	positive	NA	NA	NA	mastectomy nos	negative	other	NA	NA	NA	NA	NA	NA	21	30	NA	NA	-21309	0	0	NA	NA	NA	NA
TCGA-AR-A251-01A	8c51bbcb-7c8d-47ad-9193-70ca157c6900	a251	alive	0	3030	NA	NA	NA	51	NA	NA	NA	NA	left upper outer quadrant	sentinel lymph node biopsy plus axillary dissection	NA	NA	nationwide children's hospital	NA	NA	NA	tcga-ar-a251-f71716	093c1d48-92bc-4598-a3ee-b841a4259944	canonical	negative	positive	NA	NA	NA	mastectomy nos	negative	other	NA	NA	NA	NA	NA	NA	21	30	NA	NA	-18771	0	0	NA	NA	NA	NA
TCGA-AR-A252-01A	4d0fec97-e024-4608-a0cc-426a3decc7b1	a252	alive	0	2838	NA	NA	NA	50	left lower outer quadrant	NA	NA	NA	left upper outer quadrant	sentinel lymph node biopsy plus axillary dissection	NA	NA	nationwide children's hospital	NA	NA	NA	tcga-ar-a252-f71727	52a82191-71d1-4e9a-ab5f-7f3869722cd1	canonical	NA	positive	NA	NA	NA	NA	positive	other	NA	NA	NA	NA	NA	yes	21	30	NA	NA	-18611	0	0	NA	NA	NA	NA
TCGA-AR-A254-01A	6014a582-d22e-46e1-9000-c8e2fbad7acf	a254	alive	0	2605	NA	NA	NA	50	left lower inner quadrant	NA	NA	NA	left upper inner quadrant	sentinel lymph node biopsy plus axillary dissection	NA	NA	nationwide children's hospital	NA	NA	NA	tcga-ar-a254-f71726	5caa4b0a-9f82-4a99-ad51-4df0011ecd25	canonical	NA	positive	NA	NA	NA	NA	positive	other	NA	NA	NA	NA	NA	NA	21	30	NA	NA	-18270	0	0	NA	NA	NA	NA
TCGA-AR-A255-01A	e8f3cc64-5e15-4f4d-b73e-5c9b250a664c	a255	alive	0	2161	NA	NA	NA	62	NA	NA	NA	NA	right lower inner quadrant	sentinel lymph node biopsy plus axillary dissection	NA	NA	nationwide children's hospital	NA	NA	NA	tcga-ar-a255-f71745	457f26ce-cd5a-44a1-9c9c-13af3302b6bc	canonical	NA	positive	NA	NA	NA	NA	positive	other	NA	NA	NA	NA	NA	yes	21	30	NA	NA	-22809	0	0	NA	NA	NA	NA
TCGA-AR-A256-01A	d3d545b3-457f-4389-821f-704cb24aff7f	a256	dead	2854	2854	NA	NA	NA	45	NA	NA	NA	NA	right lower inner quadrant	sentinel lymph node biopsy plus axillary dissection	NA	NA	nationwide children's hospital	NA	NA	NA	tcga-ar-a256-f31923	abdb80d8-bc00-469d-9827-36679803f8ef	canonical	NA	negative	NA	NA	NA	NA	negative	other	NA	NA	NA	NA	NA	yes	21	11	NA	NA	-16642	0	0	NA	NA	NA	NA
TCGA-AR-A2LE-01A	e3fcbf94-d3ef-4a37-aa45-5297f96af9eb	a2le	alive	0	5062	NA	NA	NA	69	NA	NA	NA	NA	right	sentinel node biopsy alone	NA	NA	nationwide children's hospital	NA	NA	NA	tcga-ar-a2le-f71711	efeb125e-2f60-48bb-9a7b-cfb8a1e7f38f	canonical	NA	positive	NA	NA	NA	NA	negative	other	NA	NA	NA	NA	NA	yes	21	30	NA	NA	-25499	0	0	NA	NA	no	NA
TCGA-AR-A2LH-01A	376ffe63-efd7-42af-90e1-261255b28bb7	a2lh	dead	616	616	NA	NA	NA	55	NA	NA	NA	NA	right upper outer quadrant	sentinel lymph node biopsy plus axillary dissection	NA	NA	nationwide children's hospital	NA	NA	NA	tcga-ar-a2lh-f35165	0f86b9cc-d89a-47b8-a9d1-60ea8626db04	canonical	NA	negative	NA	NA	NA	NA	negative	modified radical mastectomy	NA	NA	NA	NA	NA	NA	21	6	NA	NA	-20288	0	0	NA	NA	yes	NA
TCGA-AR-A2LJ-01A	738e1acc-1f0c-4a96-9c8a-222727ef5af8	a2lj	alive	0	2632	NA	NA	NA	40	NA	NA	NA	NA	left	sentinel lymph node biopsy plus axillary dissection	NA	NA	nationwide children's hospital	NA	NA	NA	tcga-ar-a2lj-f71721	3502778e-0bfa-4cee-a207-74d9cae57f6a	canonical	NA	positive	NA	NA	NA	NA	positive	other	NA	NA	NA	NA	NA	yes	21	30	NA	NA	-14723	0	0	NA	NA	no	NA
TCGA-AR-A2LK-01A	1b703058-e596-45bc-80fe-8b98d545c2e2	a2lk	dead	1649	1649	NA	NA	NA	62	right lower outer quadrant	NA	NA	NA	right upper outer quadrant	sentinel lymph node biopsy plus axillary dissection	NA	NA	nationwide children's hospital	NA	NA	NA	tcga-ar-a2lk-f35203	01404def-ed7d-4186-9dc8-5fe8c812821b	canonical	negative	positive	NA	NA	NA	mastectomy nos	positive	other	NA	NA	NA	NA	NA	NA	21	6	NA	NA	-22800	0	0	NA	NA	no	NA
TCGA-AR-A2LM-01A	0bf6e772-1aa1-4f54-9a50-c1414e2f22f3	a2lm	alive	0	1935	NA	NA	NA	49	NA	NA	NA	NA	right	sentinel lymph node biopsy plus axillary dissection	NA	NA	nationwide children's hospital	NA	NA	NA	tcga-ar-a2lm-f71746	7e511158-49bc-41a4-b9b7-0a7639bed9d7	canonical	NA	positive	NA	NA	NA	NA	positive	simple mastectomy	NA	NA	NA	NA	NA	yes	21	30	NA	NA	-18053	0	0	NA	NA	no	NA
TCGA-AR-A2LN-01A	a076f135-be82-40fa-8516-285ed355c965	a2ln	alive	0	1161	NA	NA	NA	65	NA	NA	NA	NA	right upper outer quadrant	sentinel lymph node biopsy plus axillary dissection	NA	NA	nationwide children's hospital	NA	NA	NA	tcga-ar-a2ln-f49496	e7d8079a-0ac5-4d0d-8b52-2ff1367c2892	canonical	NA	positive	NA	NA	NA	NA	positive	other	NA	NA	NA	NA	NA	NA	21	2	NA	NA	-23992	0	0	NA	NA	no	NA
TCGA-AR-A2LO-01A	ad0fa961-c085-4f38-b3db-5fc0cbf6b64f	a2lo	alive	0	1198	NA	NA	NA	46	NA	NA	NA	NA	left lower outer quadrant	sentinel lymph node biopsy plus axillary dissection	NA	NA	nationwide children's hospital	NA	NA	NA	tcga-ar-a2lo-f49498	7d5de440-fd86-4c8d-b599-f4aeb2820aa4	canonical	NA	positive	NA	NA	NA	NA	positive	simple mastectomy	NA	NA	NA	NA	NA	NA	21	2	NA	NA	-17080	0	0	NA	NA	no	NA
TCGA-AR-A2LQ-01A	4229e432-6ac5-49d2-b58a-e8713ddb79bd	a2lq	alive	0	1233	NA	NA	NA	59	right upper outer quadrant	NA	NA	NA	right upper inner quadrant	sentinel lymph node biopsy plus axillary dissection	NA	NA	nationwide children's hospital	NA	NA	NA	tcga-ar-a2lq-f49500	1ed84a46-2dbf-4319-a235-9d33d7dce14f	canonical	NA	positive	NA	NA	NA	NA	positive	simple mastectomy	NA	NA	NA	NA	NA	NA	21	2	NA	NA	-21865	0	0	NA	NA	no	NA
TCGA-AR-A5QN-01A	077506ea-8f11-405d-bb8e-3c9924fe54d0	a5qn	alive	0	1013	NA	NA	NA	68	NA	NA	NA	NA	left	axillary lymph node dissection alone	NA	NA	nationwide children's hospital	NA	NA	NA	tcga-ar-a5qn-f69265	1b86cee2-9c01-4e9f-8083-a7e49604b86c	canonical	NA	positive	NA	NA	NA	NA	positive	modified radical mastectomy	NA	NA	NA	NA	NA	NA	21	31	NA	NA	-25089	0	0	NA	NA	NA	NA
TCGA-AR-A5QP-01A	3c275152-d04b-440c-9621-2fc05ea977b6	a5qp	alive	0	1185	NA	NA	NA	54	NA	NA	NA	NA	left	sentinel lymph node biopsy plus axillary dissection	NA	NA	nationwide children's hospital	NA	NA	NA	tcga-ar-a5qp-f69266	e98992f8-020a-46a2-a019-dc50f9c178c3	canonical	NA	positive	NA	NA	NA	NA	positive	lumpectomy	NA	NA	NA	NA	NA	NA	21	31	NA	NA	-19805	0	0	NA	NA	NA	NA
TCGA-AR-A5QQ-01A	3af31fcf-ad0c-4fd9-a8e3-10f9176b5e9d	a5qq	dead	322	322	NA	NA	NA	68	NA	NA	NA	NA	right	axillary lymph node dissection alone	NA	NA	nationwide children's hospital	NA	NA	NA	tcga-ar-a5qq-f42734	8318bd8e-9128-4a44-ab63-98e5a2459230	canonical	NA	negative	NA	NA	NA	NA	negative	modified radical mastectomy	NA	NA	NA	NA	NA	NA	21	10	NA	NA	-24841	0	0	NA	NA	NA	NA
TCGA-B6-A0I1-01A	5dd423e8-feaa-4568-a750-500948c41d6c	a0i1	dead	2361	2361	NA	NA	NA	73	NA	NA	NA	NA	left upper outer quadrant	axillary lymph node dissection alone	NA	NA	nationwide children's hospital	NA	NA	NA	tcga-b6-a0i1-f38909	31cba550-5941-49db-b716-73f9f87ba3e9	canonical	NA	negative	NA	NA	NA	NA	negative	modified radical mastectomy	NA	NA	NA	NA	NA	no	21	3	NA	NA	-26902	0	0	NA	NA	NA	NA
TCGA-B6-A0I2-01A	328dfcb0-b5ae-43f2-bc87-dad0ab3df9e7	a0i2	alive	0	4361	NA	NA	NA	45	left	NA	NA	NA	left upper outer quadrant	axillary lymph node dissection alone	NA	NA	nationwide children's hospital	NA	NA	NA	tcga-b6-a0i2-f12630	57fe226b-27f7-407b-81e0-eb90a79dc9db	canonical	NA	NA	NA	NA	NA	NA	NA	NA	NA	NA	NA	NA	NA	no	21	2	NA	NA	-16702	0	0	NA	NA	NA	NA
TCGA-B6-A0I5-01A	1a18974d-967c-4727-b42e-12ae7be66589	a0i5	alive	0	8556	NA	NA	NA	49	NA	NA	NA	NA	right lower inner quadrant	axillary lymph node dissection alone	NA	NA	nationwide children's hospital	NA	NA	NA	tcga-b6-a0i5-f71505	d037df28-a91c-4f37-9dae-68f9cb4a367e	canonical	NA	positive	NA	NA	NA	NA	positive	other	NA	NA	NA	NA	NA	no	21	26	NA	NA	-18038	0	0	NA	NA	NA	NA
TCGA-B6-A0I6-01A	045c13ef-3db7-4adf-b0a3-23338f0479f3	a0i6	dead	991	991	NA	no	NA	49	left	NA	NA	NA	left upper outer quadrant	axillary lymph node dissection alone	NA	NA	nationwide children's hospital	NA	NA	NA	tcga-b6-a0i6-f12605	dca585a3-16b1-4a99-9c5a-aeb6183e3c9e	canonical	NA	negative	NA	NA	NA	NA	negative	modified radical mastectomy	NA	NA	NA	NA	NA	no	21	1	NA	NA	-18014	0	0	NA	NA	NA	NA
TCGA-B6-A0I9-01A	44954053-0b93-4577-a436-42777e442300	a0i9	dead	362	362	NA	NA	NA	62	left	NA	NA	NA	left lower outer quadrant	no axillary staging	NA	NA	nationwide children's hospital	NA	NA	NA	tcga-b6-a0i9-f12609	a410adee-b8aa-4e7f-bd5e-134e99d6bfee	canonical	NA	indeterminate	NA	NA	NA	NA	positive	NA	NA	NA	NA	NA	NA	no	21	1	NA	NA	-22798	0	0	NA	NA	NA	NA
TCGA-B6-A0IA-01A	0807435a-e75e-4e04-8e45-ed0cd49a841a	a0ia	alive	0	8391	NA	NA	NA	51	NA	NA	NA	NA	right	axillary lymph node dissection alone	NA	NA	nationwide children's hospital	NA	NA	NA	tcga-b6-a0ia-f71513	0f55e065-c77c-4851-8f2e-1e223af5ce7c	canonical	NA	positive	NA	NA	NA	NA	positive	other	NA	NA	NA	NA	NA	no	21	26	NA	NA	-18748	0	0	NA	NA	NA	NA
TCGA-B6-A0IB-01A	157ec9e0-ca6e-4da1-9233-f976cf0db433	a0ib	dead	3941	3941	NA	no	NA	64	right	NA	NA	NA	right upper inner quadrant	axillary lymph node dissection alone	NA	NA	nationwide children's hospital	NA	NA	NA	tcga-b6-a0ib-f12612	b3ce5bb9-a83f-46d9-b1b3-71711115fff4	canonical	NA	positive	NA	NA	NA	NA	positive	modified radical mastectomy	NA	NA	NA	NA	NA	no	21	1	NA	NA	-23646	0	0	NA	NA	NA	NA
TCGA-B6-A0IC-01A	b804f7ae-da8f-4414-be11-f880f1859160	a0ic	dead	1542	1542	NA	NA	NA	90	NA	NA	NA	NA	right	no axillary staging	NA	NA	nationwide children's hospital	NA	NA	NA	tcga-b6-a0ic-f12613	cf95fd2e-c76a-41eb-9f33-ebe7067b8203	canonical	NA	positive	NA	NA	NA	NA	positive	other	NA	NA	NA	NA	NA	no	21	1	NA	NA	-32872	0	0	NA	NA	NA	NA
TCGA-B6-A0IE-01A	3f834fa7-6d7b-4b85-98c0-5c55d55b6c95	a0ie	dead	1993	1993	NA	no	NA	38	left	NA	NA	NA	left upper outer quadrant	axillary lymph node dissection alone	NA	NA	nationwide children's hospital	NA	NA	NA	tcga-b6-a0ie-f12614	9b0d40dc-3c41-4873-8c8e-9b8d06a6ec6e	canonical	negative	negative	NA	NA	NA	NA	negative	other	NA	NA	NA	NA	NA	no	21	1	NA	NA	-13982	0	0	NA	NA	NA	NA
TCGA-B6-A0IG-01A	34ab0cb8-bf19-4cbb-b4eb-3c45ee5aa60b	a0ig	dead	4456	4456	NA	NA	NA	50	NA	NA	NA	NA	left	axillary lymph node dissection alone	NA	NA	nationwide children's hospital	NA	NA	NA	tcga-b6-a0ig-f12616	8fd670ac-8e65-4365-8f5f-b23f906ed929	canonical	NA	positive	NA	NA	NA	NA	positive	modified radical mastectomy	NA	NA	NA	NA	NA	no	21	2	NA	NA	-18433	0	0	NA	NA	NA	NA
TCGA-B6-A0IH-01A	2476dda9-da2a-4242-9642-b92b8b9b1c79	a0ih	dead	3418	3418	NA	NA	NA	81	left	NA	NA	NA	left upper outer quadrant	axillary lymph node dissection alone	NA	NA	nationwide children's hospital	NA	NA	NA	tcga-b6-a0ih-f12617	a5fe44d8-efb4-473a-b201-4e3502c030d9	canonical	negative	positive	NA	NA	NA	modified radical mastectomy	positive	other	NA	NA	NA	NA	NA	no	21	2	NA	NA	-29907	0	0	NA	NA	NA	NA
TCGA-B6-A0IJ-01A	2c86c3ea-d926-4d39-a5ae-39ece4774287	a0ij	alive	0	7106	NA	NA	NA	42	right	NA	NA	NA	right upper outer quadrant	axillary lymph node dissection alone	NA	NA	nationwide children's hospital	NA	NA	NA	tcga-b6-a0ij-f71500	118f133d-5c79-473c-b86b-7cf50eebcfb2	canonical	NA	positive	NA	NA	NA	NA	positive	modified radical mastectomy	NA	NA	NA	NA	NA	no	21	26	NA	NA	-15625	0	0	NA	NA	NA	NA
TCGA-B6-A0IK-01A	0491063c-14a7-4104-8002-1459126332f3	a0ik	dead	571	571	NA	yes	NA	63	NA	NA	NA	NA	left	NA	NA	NA	nationwide children's hospital	NA	NA	NA	tcga-b6-a0ik-f12621	5c061f46-f69e-458a-a125-056c62d4e583	canonical	negative	negative	NA	NA	NA	modified radical mastectomy	negative	lumpectomy	NA	NA	NA	NA	NA	no	21	2	NA	489	-23150	0	0	NA	NA	NA	NA
TCGA-B6-A0IM-01A	5a4b7098-1f6a-49e9-b364-29d6d34f5bd5	a0im	dead	3873	3873	NA	NA	NA	75	right	NA	NA	NA	right upper outer quadrant	axillary lymph node dissection alone	NA	NA	nationwide children's hospital	NA	NA	NA	tcga-b6-a0im-f12623	2bd40a19-71a1-4898-94da-8efd7fc2f2a2	canonical	negative	positive	NA	NA	NA	modified radical mastectomy	positive	lumpectomy	NA	NA	NA	NA	NA	no	21	2	NA	NA	-27557	0	0	NA	NA	NA	NA
TCGA-B6-A0IN-01A	16a8d916-ad46-4690-b1a5-3b2b323f4336	a0in	dead	2573	2573	NA	no	NA	45	right	NA	NA	NA	right upper outer quadrant	no axillary staging	NA	NA	nationwide children's hospital	NA	NA	NA	tcga-b6-a0in-f12625	b47c325b-7239-402e-8708-8c6de45e6459	canonical	negative	positive	NA	NA	NA	modified radical mastectomy	negative	other	NA	NA	NA	NA	NA	no	21	2	NA	NA	-16705	0	0	NA	NA	NA	NA
TCGA-B6-A0IO-01A	04af44fc-c487-4005-b3cb-cb64815824a2	a0io	alive	0	5042	NA	NA	NA	66	NA	NA	NA	NA	left	axillary lymph node dissection alone	NA	NA	nationwide children's hospital	NA	NA	NA	tcga-b6-a0io-f71503	e3ba117d-59d6-449b-9ac8-88becdb2682a	canonical	NA	positive	NA	NA	NA	NA	indeterminate	modified radical mastectomy	NA	NA	NA	NA	NA	no	21	26	NA	NA	-24322	0	0	NA	NA	NA	NA
TCGA-B6-A0IP-01A	1402082d-25c9-4148-8a1e-f58450b706bb	a0ip	dead	3926	3926	NA	NA	NA	74	NA	NA	NA	NA	left upper outer quadrant	axillary lymph node dissection alone	NA	NA	nationwide children's hospital	NA	NA	NA	tcga-b6-a0ip-f71501	6c5adb8c-ac1e-4330-b52d-bd8a8a9b567b	canonical	NA	positive	NA	NA	NA	NA	positive	modified radical mastectomy	NA	NA	NA	NA	NA	no	21	26	NA	NA	-27047	0	0	NA	NA	NA	NA
TCGA-B6-A0IQ-01A	01eef340-598c-4205-a990-cec190ac2ca5	a0iq	alive	0	4285	NA	NA	NA	40	left	NA	NA	NA	left upper outer quadrant	axillary lymph node dissection alone	NA	NA	nationwide children's hospital	NA	NA	NA	tcga-b6-a0iq-f12629	8d04efd2-bfda-4f6b-aca2-e86c4b2b9b74	canonical	NA	negative	NA	NA	NA	NA	negative	modified radical mastectomy	NA	NA	NA	NA	NA	no	21	2	NA	NA	-14669	0	0	NA	NA	NA	NA
TCGA-B6-A0RE-01A	08da7c4c-3067-4bcf-9d7a-78566df72e69	a0re	alive	0	7777	NA	NA	NA	61	right	NA	NA	NA	right upper outer quadrant	axillary lymph node dissection alone	NA	NA	nationwide children's hospital	NA	NA	NA	tcga-b6-a0re-f71507	68a0a63c-7d7b-433d-aa9f-84e7f9365ea8	canonical	NA	negative	NA	NA	NA	NA	negative	modified radical mastectomy	NA	NA	NA	NA	NA	no	21	26	NA	NA	-22449	0	0	NA	NA	NA	NA
TCGA-B6-A0RG-01A	9b13927c-7357-44fd-8385-92ae6a656b7d	a0rg	alive	0	2082	NA	NA	NA	26	NA	NA	NA	NA	left	axillary lymph node dissection alone	NA	NA	nationwide children's hospital	NA	NA	NA	tcga-b6-a0rg-f13793	81c89d48-283c-43b0-97ae-f30bb640272d	canonical	NA	negative	NA	NA	NA	NA	negative	lumpectomy	NA	NA	NA	NA	NA	no	21	12	NA	NA	-9840	0	0	NA	NA	NA	NA
TCGA-B6-A0RH-01A	c3148e68-1739-4334-abda-1dcbc2166846	a0rh	dead	6456	6456	NA	yes	NA	51	NA	NA	NA	NA	left lower inner quadrant	axillary lymph node dissection alone	NA	NA	nationwide children's hospital	NA	NA	NA	tcga-b6-a0rh-f71512	8ad42059-f3db-4b45-b375-f6321ba31ccf	canonical	negative	positive	NA	NA	NA	NA	positive	modified radical mastectomy	NA	NA	NA	NA	NA	no	21	26	NA	2268	-18759	0	0	NA	NA	NA	NA
TCGA-B6-A0RI-01A	bfd55808-dddd-44c3-97d7-41600497b992	a0ri	alive	0	7126	NA	yes	NA	44	right	NA	NA	NA	right upper outer quadrant	axillary lymph node dissection alone	NA	NA	nationwide children's hospital	NA	NA	NA	tcga-b6-a0ri-f13795	654d049a-8513-4069-b954-cf23980c432e	canonical	NA	positive	NA	NA	NA	NA	positive	modified radical mastectomy	NA	NA	NA	NA	NA	no	21	12	NA	1100	-16138	0	0	NA	NA	NA	NA
TCGA-B6-A0RL-01A	5562455d-bbb8-46eb-a510-e8c6e1e26789	a0rl	dead	2469	2469	NA	NA	NA	60	NA	NA	NA	NA	left	axillary lymph node dissection alone	NA	NA	nationwide children's hospital	NA	NA	NA	tcga-b6-a0rl-f13796	b2545806-ef62-435d-8c96-4be1afc4178e	canonical	NA	positive	NA	NA	NA	NA	positive	modified radical mastectomy	NA	NA	NA	NA	NA	no	21	12	NA	NA	-22238	0	0	NA	NA	NA	NA
TCGA-B6-A0RM-01A	151f3677-6854-4265-9126-d92c646c67ae	a0rm	dead	2373	2373	NA	NA	NA	57	NA	NA	NA	NA	left	no axillary staging	NA	NA	nationwide children's hospital	NA	NA	NA	tcga-b6-a0rm-f13797	fae88c3c-4ae1-4274-b83f-edf870d50e59	canonical	NA	positive	NA	NA	NA	NA	positive	NA	NA	NA	NA	NA	NA	no	21	12	NA	NA	-21047	0	0	NA	NA	NA	NA
TCGA-B6-A0RN-01A	2199b7a1-bd47-4bb5-b36a-a3e291e3e259	a0rn	alive	0	8008	NA	NA	NA	60	right	NA	NA	NA	right upper inner quadrant	axillary lymph node dissection alone	NA	NA	nationwide children's hospital	NA	NA	NA	tcga-b6-a0rn-f71514	268e69d6-e783-4413-9fc9-6d584e476cf4	canonical	NA	negative	NA	NA	NA	NA	negative	modified radical mastectomy	NA	NA	NA	NA	NA	no	21	26	NA	NA	-22077	0	0	NA	NA	NA	NA
TCGA-B6-A0RO-01A	0b172e29-6166-4863-803d-a0a010887c11	a0ro	alive	0	4929	NA	NA	NA	71	NA	NA	NA	NA	right	axillary lymph node dissection alone	NA	NA	nationwide children's hospital	NA	NA	NA	tcga-b6-a0ro-f13799	9a962820-d315-4506-9994-96c7c5a52c5f	canonical	NA	positive	NA	NA	NA	NA	positive	modified radical mastectomy	NA	NA	NA	NA	NA	no	21	12	NA	NA	-26269	0	0	NA	NA	NA	NA
TCGA-B6-A0RP-01A	451e1a67-47e6-4738-99d7-fb7771ef61a3	a0rp	dead	3126	3126	NA	no	NA	73	left	NA	NA	NA	left upper outer quadrant	axillary lymph node dissection alone	NA	NA	nationwide children's hospital	NA	NA	NA	tcga-b6-a0rp-f13786	3a57f47c-7fc0-48b0-9f95-b5c63cec73be	canonical	negative	positive	NA	NA	NA	modified radical mastectomy	positive	lumpectomy	NA	NA	NA	NA	NA	no	21	12	NA	NA	-26941	0	0	NA	NA	NA	NA
TCGA-B6-A0RQ-01A	caa9b533-24b4-4ecd-9159-c165de049f6a	a0rq	dead	4267	4267	NA	NA	NA	68	right	NA	NA	NA	right upper outer quadrant	axillary lymph node dissection alone	NA	NA	nationwide children's hospital	NA	NA	NA	tcga-b6-a0rq-f13787	a826efb1-9ff7-48d1-9c56-36e5a2747ca7	canonical	negative	positive	NA	NA	NA	NA	positive	other	NA	NA	NA	NA	NA	no	21	12	NA	NA	-25010	0	0	NA	NA	NA	NA
TCGA-B6-A0RS-01A	9416ff9b-6f29-4554-b04d-b537a3ae3969	a0rs	dead	3063	3063	NA	yes	NA	38	left	NA	NA	NA	left lower inner quadrant	axillary lymph node dissection alone	NA	NA	nationwide children's hospital	NA	NA	NA	tcga-b6-a0rs-f13788	3b180a84-15de-49bc-8e60-e6e97cd0ee18	canonical	NA	negative	NA	NA	NA	NA	negative	modified radical mastectomy	NA	NA	NA	NA	NA	no	21	12	NA	2041	-14134	0	0	NA	NA	NA	NA
TCGA-B6-A0RT-01A	4bf50455-9ab7-4521-a791-089f66d3b877	a0rt	alive	0	2721	NA	NA	NA	39	right	NA	NA	NA	right upper outer quadrant	axillary lymph node dissection alone	NA	NA	nationwide children's hospital	NA	NA	NA	tcga-b6-a0rt-f13789	1e4f30e1-0f1a-4fd6-a858-b54d79689792	canonical	NA	negative	NA	NA	NA	NA	negative	modified radical mastectomy	NA	NA	NA	NA	NA	no	21	12	NA	NA	-14374	0	0	NA	NA	NA	NA
TCGA-B6-A0RU-01A	6956473b-92e5-4069-a26b-b48e280e76f2	a0ru	alive	0	8605	NA	yes	NA	40	NA	NA	NA	NA	right	axillary lymph node dissection alone	NA	NA	nationwide children's hospital	NA	NA	NA	tcga-b6-a0ru-f71565	c76b35d5-c269-4642-994f-7458c733f814	canonical	NA	negative	NA	NA	NA	NA	negative	other	NA	NA	NA	NA	NA	no	21	26	NA	3076	-14920	0	0	NA	NA	NA	NA
TCGA-B6-A0RV-01A	cd3faa15-743c-476f-ab0d-f205b14126b6	a0rv	alive	0	5156	NA	NA	NA	42	NA	NA	NA	NA	right	axillary lymph node dissection alone	NA	NA	nationwide children's hospital	NA	NA	NA	tcga-b6-a0rv-f13791	2950ee46-b267-4898-9adf-b5b140cad0a8	canonical	NA	positive	NA	NA	NA	NA	positive	modified radical mastectomy	NA	NA	NA	NA	NA	no	21	12	NA	NA	-15507	0	0	NA	NA	NA	NA
TCGA-B6-A0WS-01A	197741de-a098-4f04-bb37-8ea8b3bb39bc	a0ws	dead	2965	2965	NA	NA	NA	58	left	NA	NA	NA	left upper outer quadrant	no axillary staging	NA	NA	nationwide children's hospital	NA	NA	NA	tcga-b6-a0ws-f15707	2e7292cb-c5a8-4e31-b7bc-7029b5951134	canonical	NA	positive	NA	NA	NA	NA	positive	lumpectomy	NA	NA	NA	NA	NA	no	21	29	NA	NA	-21230	0	0	NA	NA	NA	NA
TCGA-B6-A0WT-01A	d7195183-9fe4-4b17-bcfd-9367d2e539ce	a0wt	alive	0	5739	NA	yes	NA	61	left	NA	NA	NA	left lower inner quadrant	axillary lymph node dissection alone	NA	NA	nationwide children's hospital	NA	NA	NA	tcga-b6-a0wt-f15728	7b8507dd-57be-4892-89f5-ce354094972f	canonical	NA	positive	NA	NA	NA	NA	positive	modified radical mastectomy	NA	NA	NA	NA	NA	no	21	29	NA	3862	-22362	0	0	NA	NA	NA	NA
TCGA-B6-A0WV-01A	7588a286-6935-424a-bc5f-92e24c83eb37	a0wv	dead	2417	2417	NA	NA	NA	67	NA	NA	NA	NA	right	axillary lymph node dissection alone	NA	NA	nationwide children's hospital	NA	NA	NA	tcga-b6-a0wv-f15732	19ea87a8-6263-4ab4-99a7-f46f9369f416	canonical	NA	positive	NA	NA	NA	NA	positive	modified radical mastectomy	NA	NA	NA	NA	NA	no	21	29	NA	NA	-24803	0	0	NA	NA	NA	NA
TCGA-B6-A0WW-01A	f02931f8-d72a-481d-b532-8b141dab115f	a0ww	dead	558	558	NA	no	NA	58	right	NA	NA	NA	right upper inner quadrant	axillary lymph node dissection alone	NA	NA	nationwide children's hospital	NA	NA	NA	tcga-b6-a0ww-f15734	8cbc2a93-dcb9-4aef-9c63-54316907c361	canonical	NA	positive	NA	NA	NA	NA	positive	modified radical mastectomy	NA	NA	NA	NA	NA	no	21	29	NA	NA	-21479	0	0	NA	NA	NA	NA
TCGA-B6-A0WX-01A	a482fc4c-ff1d-46a0-a968-7df06422cc4b	a0wx	dead	639	639	NA	no	NA	40	NA	NA	NA	NA	left	axillary lymph node dissection alone	NA	NA	nationwide children's hospital	NA	NA	NA	tcga-b6-a0wx-f15729	ba8b9efe-3133-40b3-9336-0cd5c63b5d0a	canonical	NA	negative	NA	NA	NA	NA	negative	modified radical mastectomy	NA	NA	NA	NA	NA	no	21	29	NA	NA	-14784	0	0	NA	NA	NA	NA
TCGA-B6-A0WY-01A	f475d460-75cd-4fe9-aa54-c90be12b4ef8	a0wy	dead	3461	3461	NA	no	NA	40	left	NA	NA	NA	left lower inner quadrant	axillary lymph node dissection alone	NA	NA	nationwide children's hospital	NA	NA	NA	tcga-b6-a0wy-f15730	3547c7d8-047e-4255-9e3b-662b6e1cbcb9	canonical	NA	positive	NA	NA	NA	NA	negative	lumpectomy	NA	NA	NA	NA	NA	no	21	29	NA	NA	-14778	0	0	NA	NA	NA	NA
TCGA-B6-A0WZ-01A	08740d7f-5a5e-4dfa-bd48-7fbf228a7a28	a0wz	alive	0	6292	NA	NA	NA	50	right	NA	NA	NA	right upper inner quadrant	axillary lymph node dissection alone	NA	NA	nationwide children's hospital	NA	NA	NA	tcga-b6-a0wz-f71575	b36349b9-27d9-4343-9447-a347465484a3	canonical	NA	positive	NA	NA	NA	NA	positive	other	NA	NA	NA	NA	NA	no	21	30	NA	NA	-18584	0	0	NA	NA	NA	NA
TCGA-B6-A0X0-01A	1e68e760-a4cf-4100-bf9c-e50fa8d126f6	a0x0	dead	3945	3945	NA	NA	NA	54	right	NA	NA	NA	right upper outer quadrant	axillary lymph node dissection alone	NA	NA	nationwide children's hospital	NA	NA	NA	tcga-b6-a0x0-f15710	b50dbb7c-6050-4e27-9fe2-3d444cd297a0	canonical	NA	positive	NA	NA	NA	NA	positive	modified radical mastectomy	NA	NA	NA	NA	NA	no	21	29	NA	NA	-19802	0	0	NA	NA	NA	NA
TCGA-B6-A0X1-01A	178b2c48-c07d-422e-ae17-8bcfd996ad51	a0x1	dead	7455	7455	NA	no	NA	48	NA	NA	NA	NA	left	axillary lymph node dissection alone	NA	NA	nationwide children's hospital	NA	NA	NA	tcga-b6-a0x1-f71498	b774767e-92cc-4bd1-a7ee-6615fe09c623	canonical	NA	negative	NA	NA	NA	NA	negative	other	NA	NA	NA	NA	NA	no	21	26	NA	NA	-17624	0	0	NA	NA	NA	NA
TCGA-B6-A0X4-01A	4e42fdc5-2a8b-49e9-87ef-6db7a6692d08	a0x4	dead	860	860	NA	no	NA	62	NA	NA	NA	NA	left	axillary lymph node dissection alone	NA	NA	nationwide children's hospital	NA	NA	NA	tcga-b6-a0x4-f15723	29fcf3a8-ac74-45df-8a7f-9b4eabace410	canonical	NA	positive	NA	NA	NA	NA	positive	modified radical mastectomy	NA	NA	NA	NA	NA	no	21	29	NA	NA	-22688	0	0	NA	NA	NA	NA
TCGA-B6-A0X5-01A	4e6edfe6-adcb-4c12-8ff4-38a79f5887e8	a0x5	dead	2097	2097	NA	no	NA	61	NA	NA	NA	NA	left	axillary lymph node dissection alone	NA	NA	nationwide children's hospital	NA	NA	NA	tcga-b6-a0x5-f15726	51d5c754-2ad5-4c88-9d30-fb526027e827	canonical	NA	positive	NA	NA	NA	NA	positive	modified radical mastectomy	NA	NA	NA	NA	NA	no	21	29	NA	NA	-22380	0	0	NA	NA	NA	NA
TCGA-B6-A0X7-01A	5b9a5cd2-5ec8-48a0-b9f2-da9bede0b089	a0x7	dead	1781	1781	NA	yes	NA	62	NA	NA	NA	NA	right	no axillary staging	NA	NA	nationwide children's hospital	NA	NA	NA	tcga-b6-a0x7-f15714	407d3bee-e689-48d3-bd64-8c07564e2ad9	canonical	NA	positive	NA	NA	NA	NA	positive	NA	NA	NA	NA	NA	NA	no	21	29	NA	1104	-22723	0	0	NA	NA	NA	NA
TCGA-B6-A1KC-01A	1502c7d7-1535-4e56-9f34-30623acd50d5	a1kc	alive	0	1326	NA	NA	NA	67	NA	NA	NA	NA	right lower outer quadrant	sentinel node biopsy alone	NA	NA	nationwide children's hospital	NA	NA	NA	tcga-b6-a1kc-f15740	c4ffd639-1d13-4e8e-80dc-b8d3730d3f2f	canonical	NA	positive	NA	NA	NA	NA	negative	lumpectomy	NA	NA	NA	NA	NA	no	21	29	NA	NA	-24791	0	0	NA	NA	no	NA
TCGA-B6-A1KF-01A	f30eb65f-fb44-4062-ac39-a38d072f655f	a1kf	alive	0	3088	NA	NA	NA	68	NA	NA	NA	NA	right lower outer quadrant	axillary lymph node dissection alone	NA	NA	nationwide children's hospital	NA	NA	NA	tcga-b6-a1kf-f15739	61e927f2-f19e-4ba3-8df6-318c8bb8e3a5	canonical	NA	negative	NA	NA	NA	NA	negative	other	NA	NA	NA	NA	NA	no	21	29	NA	NA	-24891	0	0	NA	NA	no	NA
TCGA-B6-A1KI-01A	1dafdd64-527d-4d46-bbdf-7a97774f881b	a1ki	alive	0	2236	NA	NA	NA	63	NA	NA	NA	NA	right upper inner quadrant	sentinel node biopsy alone	NA	NA	nationwide children's hospital	NA	NA	NA	tcga-b6-a1ki-f15737	59d24e41-b9fe-49f2-8b2c-08589b98f220	canonical	NA	positive	NA	NA	NA	NA	positive	other	NA	NA	NA	NA	NA	no	21	29	NA	NA	-23031	0	0	NA	NA	no	NA
TCGA-B6-A1KN-01A	271404de-24e8-43f6-806b-fb510c1124c4	a1kn	alive	0	4233	NA	NA	NA	57	NA	NA	NA	NA	right upper inner quadrant	axillary lymph node dissection alone	NA	NA	nationwide children's hospital	NA	NA	NA	tcga-b6-a1kn-f15738	9c9ed6d8-b891-45c3-affc-98008f6956bb	canonical	NA	negative	NA	NA	NA	NA	negative	modified radical mastectomy	NA	NA	NA	NA	NA	no	21	29	NA	NA	-21183	0	0	NA	NA	no	NA
TCGA-B6-A2IU-01A	9857be0c-aeca-4a43-90b1-0535bd08e086	a2iu	alive	0	5176	NA	NA	NA	62	NA	NA	NA	NA	right	axillary lymph node dissection alone	NA	NA	nationwide children's hospital	NA	NA	NA	tcga-b6-a2iu-f38907	63102408-1829-4144-8ce6-018fa7240b97	canonical	NA	positive	NA	NA	NA	NA	positive	modified radical mastectomy	NA	NA	NA	NA	NA	no	21	3	NA	NA	-22905	0	0	NA	NA	NA	NA
TCGA-B6-A3ZX-01A	9434687a-197c-4959-b6b8-9c05f1dd7f53	a3zx	dead	1152	1152	NA	NA	NA	50	NA	NA	NA	NA	left upper inner quadrant	axillary lymph node dissection alone	NA	NA	nationwide children's hospital	NA	NA	NA	tcga-b6-a3zx-f59573	2242bb2f-c23e-4005-94ca-3e9f32043c1c	canonical	negative	negative	4 point scale	1+	4 point scale	lumpectomy	negative	lumpectomy	NA	NA	NA	NA	NA	no	21	3	NA	NA	-18434	0	0	NA	NA	NA	NA
TCGA-B6-A400-01A	d9a1c06f-7b50-46b0-878e-89e8c31863ae	a400	alive	0	215	NA	NA	NA	43	NA	NA	NA	NA	left upper outer quadrant	sentinel lymph node biopsy plus axillary dissection	NA	NA	nationwide children's hospital	NA	NA	NA	tcga-b6-a400-f59655	59780d28-66a6-427c-9e17-691b40c10281	canonical	NA	negative	4 point scale	1+	4 point scale	NA	negative	lumpectomy	NA	NA	NA	NA	NA	no	21	3	NA	NA	-16022	0	0	NA	NA	NA	NA
TCGA-B6-A401-01A	48ff0420-0f19-4e9d-a75d-6c54949a461a	a401	alive	0	2596	NA	NA	NA	47	NA	NA	NA	NA	left upper outer quadrant	sentinel lymph node biopsy plus axillary dissection	NA	NA	nationwide children's hospital	NA	NA	NA	tcga-b6-a401-f59658	598c5ff1-2d6f-4041-98a3-d52614bac4f3	canonical	NA	positive	4 point scale	3+	4 point scale	NA	positive	lumpectomy	NA	NA	NA	NA	NA	no	21	3	NA	NA	-17438	0	0	NA	NA	NA	NA
TCGA-B6-A402-01A	75b3fe55-1a63-426e-867e-2ef52f54778d	a402	alive	0	2281	NA	NA	NA	47	NA	NA	NA	NA	right lower outer quadrant	sentinel node biopsy alone	NA	NA	nationwide children's hospital	NA	NA	NA	tcga-b6-a402-f60751	65f37e9f-5fde-4d4d-bbc9-2698b4b4f03c	canonical	NA	negative	4 point scale	1+	4 point scale	NA	negative	lumpectomy	NA	NA	NA	NA	NA	yes	21	8	NA	NA	-17314	0	0	NA	NA	NA	NA
TCGA-B6-A408-01A	9964f447-92ad-4d1e-af20-11cf84fab7b0	a408	alive	0	2072	NA	NA	NA	55	NA	NA	NA	NA	left	axillary lymph node dissection alone	NA	NA	nationwide children's hospital	NA	NA	NA	tcga-b6-a408-f59666	3c48974e-14e5-44bf-b964-c5e7c18ff99f	canonical	NA	positive	4 point scale	3+	4 point scale	NA	positive	simple mastectomy	NA	NA	NA	NA	NA	no	21	3	NA	NA	-20102	0	0	NA	NA	NA	NA
TCGA-B6-A409-01A	5362cbc4-cd28-4afd-a8ac-1a4c2c33cad2	a409	dead	573	573	NA	NA	NA	44	NA	NA	NA	NA	right upper outer quadrant	sentinel lymph node biopsy plus axillary dissection	NA	NA	nationwide children's hospital	NA	NA	NA	NA	NA	canonical	NA	negative	4 point scale	1+	4 point scale	NA	negative	simple mastectomy	NA	NA	NA	NA	NA	no	21	11	NA	NA	-16178	0	0	NA	NA	NA	NA
TCGA-B6-A40B-01A	8539e15f-ba40-4219-aaeb-08d0ab101311	a40b	alive	0	3152	NA	NA	NA	76	NA	NA	NA	NA	left upper outer quadrant	sentinel node biopsy alone	NA	NA	nationwide children's hospital	NA	NA	NA	tcga-b6-a40b-f59661	b9d049e2-d4b2-495f-a644-3e44e9c01d0c	canonical	NA	positive	4 point scale	3+	4 point scale	NA	positive	lumpectomy	NA	NA	NA	NA	NA	yes	21	3	NA	NA	-27811	0	0	NA	NA	NA	NA
TCGA-B6-A40C-01A	fd0b1b8b-1a76-480a-b61c-d176e4e02c6b	a40c	alive	0	2164	NA	NA	NA	51	NA	NA	NA	NA	left upper outer quadrant	sentinel node biopsy alone	NA	NA	nationwide children's hospital	NA	NA	NA	tcga-b6-a40c-f59660	3c1ba7e3-2f4e-4fe3-b558-91284b51cc4e	canonical	NA	positive	4 point scale	3+	4 point scale	NA	positive	simple mastectomy	NA	NA	NA	NA	NA	yes	21	3	NA	NA	-18852	0	0	NA	NA	NA	NA
TCGA-BH-A0AU-01A	360d1d6d-cf3e-4c78-b36f-ef5e3160aa6b	a0au	alive	0	1914	NA	NA	NA	45	NA	NA	NA	NA	left upper inner quadrant	NA	NA	NA	nationwide children's hospital	case matched methylation control	NA	case matched expression control	tcga-bh-a0au-f60769	a74198de-7ecf-4cbe-a42f-c8bb8acfd761	canonical - plus	NA	positive	NA	NA	NA	NA	positive	other	NA	NA	NA	NA	NA	NA	21	16	NA	NA	-16688	0	0	NA	NA	no	NA
TCGA-BH-A0AV-01A	790ff5db-b7f3-4946-aaed-305f66b1dd6a	a0av	alive	0	1820	NA	NA	NA	52	NA	NA	NA	NA	left upper inner quadrant	NA	NA	NA	nationwide children's hospital	NA	NA	NA	tcga-bh-a0av-f59174	f2f9895e-1f5d-4a27-9394-24906331e464	canonical	NA	negative	NA	NA	NA	NA	negative	other	NA	NA	NA	NA	NA	NA	21	2	NA	NA	-19314	0	0	NA	NA	no	NA
TCGA-BH-A0AW-01A	c5891c7a-fd24-4891-8f51-373967e4a6dd	a0aw	alive	0	622	NA	NA	NA	56	left upper outer quadrant	left	NA	NA	left upper inner quadrant	axillary lymph node dissection alone	NA	NA	nationwide children's hospital	NA	NA	NA	tcga-bh-a0aw-f15445	179764c8-b58c-4ff9-9ab7-830d6a91def9	canonical	NA	positive	NA	NA	NA	NA	negative	lumpectomy	NA	NA	NA	NA	NA	no	21	3	NA	NA	-20468	0	0	NA	NA	NA	NA
TCGA-BH-A0AY-01A	93ed6066-b567-4e1c-ab81-23370f9d3452	a0ay	alive	0	777	NA	NA	NA	62	left	NA	NA	NA	left lower outer quadrant	sentinel node biopsy alone	NA	NA	nationwide children's hospital	case matched methylation control	germline comparison	case matched expression control	tcga-bh-a0ay-f15456	a54faa28-ce61-4e7a-a5c4-2cc9ffe880ca	canonical - plus	NA	positive	NA	NA	NA	NA	positive	simple mastectomy	NA	NA	NA	NA	NA	no	21	3	NA	NA	-22703	0	0	NA	NA	NA	NA
TCGA-BH-A0AZ-01A	518f231c-f5f9-4a39-a97b-7fd5666d3e50	a0az	alive	0	1919	NA	NA	NA	47	NA	NA	NA	NA	right	NA	NA	NA	nationwide children's hospital	case matched methylation control	NA	case matched expression control	tcga-bh-a0az-f58602	40b2ddd4-6b7c-471e-ad6f-4fcf39c6e504	canonical - plus	NA	positive	NA	NA	NA	NA	positive	other	NA	NA	NA	NA	NA	NA	21	15	NA	NA	-17465	0	0	NA	NA	no	NA
TCGA-BH-A0B0-01A	66af34ea-f471-4092-aff6-9ac9a5b75b11	a0b0	alive	0	2477	NA	NA	NA	56	NA	NA	NA	NA	left upper outer quadrant	NA	NA	NA	nationwide children's hospital	NA	NA	NA	tcga-bh-a0b0-f59204	8dfe37f5-c1f5-45c1-bce9-70a5209079f1	canonical	NA	positive	NA	NA	NA	NA	positive	other	NA	NA	NA	NA	NA	NA	21	2	NA	NA	-20776	0	0	NA	NA	no	NA
TCGA-BH-A0B1-01A	b4e4fea2-b802-4a86-923e-3fcbd3c708fe	a0b1	alive	0	1148	NA	NA	NA	66	right	NA	NA	NA	right upper outer quadrant	sentinel lymph node biopsy plus axillary dissection	NA	NA	nationwide children's hospital	NA	NA	NA	tcga-bh-a0b1-f15429	555cc286-5677-4a66-8fd4-e7b131d2e99b	canonical	NA	positive	NA	3+	NA	NA	positive	modified radical mastectomy	NA	NA	NA	NA	NA	no	21	3	NA	NA	-24315	0	0	NA	NA	NA	NA
TCGA-BH-A0B3-01A	18eb4dfc-556f-4bf3-a411-4780209ed1e0	a0b3	alive	0	1203	NA	NA	NA	53	right upper outer quadrant	right	NA	NA	right upper inner quadrant	sentinel lymph node biopsy plus axillary dissection	NA	NA	nationwide children's hospital	case matched methylation control	germline comparison	case matched expression control	tcga-bh-a0b3-f15418	493b0584-faa6-475f-97f9-cfe0524df460	canonical - plus	NA	negative	NA	0	NA	NA	negative	other	NA	NA	NA	NA	NA	no	21	3	NA	NA	-19479	0	0	NA	NA	NA	NA
TCGA-BH-A0B4-01A	c710f4ab-fbd9-42ed-95d4-4e6d51207f38	a0b4	alive	0	1191	NA	NA	NA	65	NA	NA	NA	NA	left	axillary lymph node dissection alone	NA	NA	nationwide children's hospital	NA	NA	NA	tcga-bh-a0b4-f15435	ae2d2c86-0f6f-4cd9-9d52-361a471b6676	canonical	NA	positive	NA	3+	NA	NA	positive	modified radical mastectomy	NA	NA	NA	NA	NA	no	21	4	NA	NA	-23980	0	0	NA	NA	NA	NA
TCGA-BH-A0B5-01A	9da462b0-93c2-4305-89f6-7199a30399a7	a0b5	alive	0	2136	NA	NA	NA	40	NA	NA	NA	NA	left	NA	NA	NA	nationwide children's hospital	NA	NA	case matched expression control	tcga-bh-a0b5-f59182	994e9dc9-8cdf-461e-a2db-c42a64512ae8	canonical - plus	NA	positive	NA	NA	NA	NA	positive	modified radical mastectomy	NA	NA	NA	NA	NA	NA	21	2	NA	NA	-14920	0	0	NA	NA	no	NA
TCGA-BH-A0B7-01A	214a4507-d974-4b3e-8525-7408fccc6a0f	a0b7	alive	0	2559	NA	NA	NA	42	NA	NA	NA	NA	right	NA	NA	NA	nationwide children's hospital	case matched methylation control	germline comparison	case matched expression control	tcga-bh-a0b7-f58717	9c4412c3-9117-491d-9b4e-9579762e7ef3	canonical - plus	NA	positive	NA	NA	NA	NA	positive	other	NA	NA	NA	NA	NA	NA	21	22	NA	NA	-15593	0	0	NA	NA	no	NA
TCGA-BH-A0B8-01A	d3a75976-67d3-40fa-9f6f-cf2a3d7b773c	a0b8	alive	0	1569	NA	NA	NA	64	right	NA	NA	NA	right upper inner quadrant	sentinel node biopsy alone	NA	NA	nationwide children's hospital	case matched methylation control	germline comparison	case matched expression control	tcga-bh-a0b8-f15442	2cc2206f-9b64-41bb-a290-4ac1379c77b6	canonical - plus	NA	positive	NA	3+	NA	NA	positive	lumpectomy	NA	NA	NA	NA	NA	no	21	3	NA	NA	-23380	0	0	NA	NA	NA	NA
TCGA-BH-A0B9-01A	5a57dc25-d252-4b22-b192-4de630d7002f	a0b9	alive	0	1572	NA	NA	NA	44	right lower outer quadrant	right	NA	NA	right lower inner quadrant	sentinel node biopsy alone	NA	NA	nationwide children's hospital	NA	NA	NA	tcga-bh-a0b9-f15438	2c430bc9-3919-471b-b6f0-ee5346626686	canonical	NA	negative	NA	0	NA	NA	negative	other	NA	NA	NA	NA	NA	no	21	4	NA	NA	-16310	0	0	NA	NA	NA	NA
TCGA-BH-A0BA-01A	49dc3e68-6206-4f16-969f-a758cc7be8ed	a0ba	alive	0	1132	NA	NA	NA	51	left upper outer quadrant	left lower inner quadrant	left lower outer quadrant	left	left upper inner quadrant	sentinel lymph node biopsy plus axillary dissection	NA	NA	nationwide children's hospital	case matched methylation control	germline comparison	case matched expression control	tcga-bh-a0ba-f15461	a7c13a2b-d403-4a9e-aa4c-8206cdd41509	canonical - plus	NA	positive	NA	1+	NA	NA	positive	modified radical mastectomy	NA	NA	NA	NA	NA	no	21	4	NA	NA	-18839	0	0	NA	NA	NA	NA
TCGA-BH-A0BC-01A	327a2395-85c8-42e1-9638-8e037a1723ed	a0bc	alive	0	974	NA	NA	NA	60	right upper outer quadrant	right	NA	NA	right upper inner quadrant	sentinel lymph node biopsy plus axillary dissection	NA	NA	nationwide children's hospital	case matched methylation control	germline comparison	case matched expression control	tcga-bh-a0bc-f4487	4825c6ea-f0a2-4f0c-9bf7-abe3f09863b9	canonical - plus	NA	positive	NA	1+	NA	NA	positive	other	NA	NA	NA	NA	NA	no	21	4	NA	NA	-21949	0	0	NA	NA	NA	NA
TCGA-BH-A0BD-01A	b379bfb8-284e-4300-8325-85cfd6809cb8	a0bd	alive	0	554	NA	NA	NA	47	left upper outer quadrant	left	NA	NA	left upper inner quadrant	sentinel lymph node biopsy plus axillary dissection	NA	NA	nationwide children's hospital	NA	NA	NA	tcga-bh-a0bd-f15423	e292a040-7f71-48f6-83e4-1d0bf934ef28	canonical	NA	positive	NA	NA	NA	NA	positive	other	NA	NA	NA	NA	NA	no	21	4	NA	NA	-17275	0	0	NA	NA	NA	NA
TCGA-BH-A0BF-01A	e6b79d7a-ed6b-459a-b040-d142616e7ab4	a0bf	dead	1324	1324	NA	NA	NA	56	NA	NA	NA	NA	right upper outer quadrant	NA	NA	NA	nationwide children's hospital	NA	NA	case matched methylation control	tcga-bh-a0bf-f59142	f0af0bd4-a367-46f9-8059-cbdfb34be1b8	canonical - plus	NA	positive	NA	NA	NA	NA	positive	other	NA	NA	NA	NA	NA	NA	21	1	NA	NA	-20691	0	0	NA	NA	no	NA
TCGA-BH-A0BG-01A	4f608829-ffc4-4527-886e-6bc764ab29f5	a0bg	alive	0	1871	NA	NA	NA	73	NA	NA	NA	NA	left lower outer quadrant	NA	NA	NA	nationwide children's hospital	NA	NA	NA	tcga-bh-a0bg-f58615	c970540d-f1a7-425c-bef1-2ad70cd6ad13	canonical	NA	negative	NA	NA	NA	NA	negative	other	NA	NA	NA	NA	NA	NA	21	16	NA	NA	-26988	0	0	NA	NA	no	NA
TCGA-BH-A0BJ-01A	d6f911b5-e895-43f8-8f86-0ac2f1bc6fae	a0bj	alive	0	660	NA	NA	NA	41	left	NA	NA	NA	left upper outer quadrant	sentinel lymph node biopsy plus axillary dissection	NA	NA	nationwide children's hospital	case matched methylation control	germline comparison	case matched expression control	tcga-bh-a0bj-f4480	75a342f3-7d6d-42f8-961d-523d0100abe8	canonical - plus	NA	positive	NA	3+	NA	NA	positive	other	NA	NA	NA	NA	NA	no	21	15	NA	NA	-15027	0	0	NA	NA	NA	NA
TCGA-BH-A0BL-01A	92b5de82-0221-4df1-8094-80f40c0bb4fa	a0bl	alive	0	2278	NA	NA	NA	35	NA	NA	NA	NA	right upper outer quadrant	NA	NA	NA	nationwide children's hospital	germline comparison	NA	case matched methylation control	tcga-bh-a0bl-f59189	3f9a600b-3723-4f22-9943-afdbe30523c5	canonical - plus	NA	negative	NA	NA	NA	NA	negative	other	NA	NA	NA	NA	NA	NA	21	2	NA	NA	-12841	0	0	NA	NA	no	NA
TCGA-BH-A0BM-01A	c2aeee6c-ba10-4cf9-b560-c739580f7bf3	a0bm	alive	0	1876	NA	NA	NA	54	right upper outer quadrant	right	NA	NA	right upper inner quadrant	sentinel lymph node biopsy plus axillary dissection	NA	NA	nationwide children's hospital	case matched methylation control	germline comparison	case matched expression control	tcga-bh-a0bm-f34064	23464adf-8e8e-4359-aa9a-0d6c5e3a3bbd	canonical - plus	NA	positive	NA	0	NA	NA	negative	lumpectomy	NA	NA	NA	NA	NA	no	21	29	NA	NA	-20049	0	0	NA	NA	NA	NA
TCGA-BH-A0BO-01A	26573441-eedb-4364-966c-e7f803deef19	a0bo	alive	0	2197	NA	NA	NA	54	NA	NA	NA	NA	left upper inner quadrant	NA	NA	NA	nationwide children's hospital	germline comparison	NA	case matched methylation control	tcga-bh-a0bo-f61949	9bc4bd65-416a-4031-aa01-5c1baa89dd04	canonical - plus	NA	positive	NA	NA	NA	NA	positive	other	NA	NA	NA	NA	NA	NA	21	10	NA	NA	-19767	0	0	NA	NA	no	NA
TCGA-BH-A0BP-01A	f251cb6c-d18e-4691-9c82-24ed1ac0abf9	a0bp	dead	2296	2296	NA	NA	NA	76	NA	NA	NA	NA	left upper outer quadrant	NA	NA	NA	nationwide children's hospital	NA	NA	NA	tcga-bh-a0bp-f59122	a6c7e31c-28d6-4762-ac61-52999f2dfb05	canonical	NA	positive	NA	NA	NA	NA	positive	other	NA	NA	NA	NA	NA	NA	21	1	NA	NA	-27917	0	0	NA	NA	no	NA
TCGA-BH-A0BQ-01A	b3bb8fd6-ee54-4813-b042-2bbe70115382	a0bq	alive	0	2255	NA	NA	NA	39	NA	NA	NA	NA	left	NA	NA	NA	nationwide children's hospital	case matched methylation control	germline comparison	case matched expression control	tcga-bh-a0bq-f58695	25cf786d-560f-4c04-a050-a7c323a6d649	canonical - plus	NA	positive	NA	NA	NA	NA	positive	other	NA	NA	NA	NA	NA	NA	21	22	NA	NA	-14494	0	0	NA	NA	no	NA
TCGA-BH-A0BR-01A	3ecb0147-276d-486c-9af0-ce437c24ba83	a0br	alive	0	2330	NA	NA	NA	59	NA	NA	NA	NA	left lower inner quadrant	NA	NA	NA	nationwide children's hospital	NA	NA	NA	tcga-bh-a0br-f61951	9ba76e22-268f-4181-8b35-a67dc8d99efc	canonical	NA	positive	NA	NA	NA	NA	positive	other	NA	NA	NA	NA	NA	NA	21	10	NA	NA	-21622	0	0	NA	NA	no	NA
TCGA-BH-A0BS-01A	2b22db1d-54a1-4b9e-a86e-a174cf51d95c	a0bs	alive	0	2612	NA	NA	NA	55	NA	NA	NA	NA	left	NA	NA	NA	nationwide children's hospital	case matched methylation control	NA	case matched expression control	tcga-bh-a0bs-f61955	7d2bc44d-7ed6-4b0d-84b9-31e38397201f	canonical - plus	NA	positive	NA	NA	NA	NA	positive	simple mastectomy	NA	NA	NA	NA	NA	NA	21	7	NA	NA	-20374	0	0	NA	NA	no	NA
TCGA-BH-A0BT-01A	a32cb96a-78bf-456e-a6ab-2d47b2c67ad4	a0bt	alive	0	2365	NA	NA	NA	56	NA	NA	NA	NA	right upper inner quadrant	NA	NA	NA	nationwide children's hospital	case matched methylation control	NA	case matched expression control	tcga-bh-a0bt-f59143	539edb85-18ff-4d9f-b1c5-f1c962551945	canonical - plus	NA	positive	NA	NA	NA	NA	positive	other	NA	NA	NA	NA	NA	NA	21	1	NA	NA	-20625	0	0	NA	NA	no	NA
TCGA-BH-A0BV-01A	87f03d04-e651-4a6e-aea6-1c946aa46202	a0bv	alive	0	1519	NA	NA	NA	78	right	NA	NA	NA	right upper inner quadrant	sentinel lymph node biopsy plus axillary dissection	NA	NA	nationwide children's hospital	case matched methylation control	germline comparison	case matched expression control	tcga-bh-a0bv-f4513	3ab769bd-c3c1-422b-a9fd-f72e00fb2d37	canonical - plus	NA	positive	NA	2+	NA	NA	positive	modified radical mastectomy	NA	NA	NA	NA	NA	no	21	16	NA	NA	-28699	0	0	NA	NA	NA	NA
TCGA-BH-A0BW-01A	5d1d00c6-fcae-479e-ae1e-de76efd41d98	a0bw	alive	0	2371	NA	NA	NA	71	NA	NA	NA	NA	left lower outer quadrant	NA	NA	NA	nationwide children's hospital	case matched methylation control	germline comparison	case matched expression control	tcga-bh-a0bw-f59127	b292c3c3-6cce-4db3-b3e2-b262836d0f7d	canonical - plus	NA	negative	NA	NA	NA	NA	negative	other	NA	NA	NA	NA	NA	NA	21	1	NA	NA	-25974	0	0	NA	NA	no	NA
TCGA-BH-A0BZ-01A	4a032bad-e726-48f2-8f39-e3acc109cc91	a0bz	alive	0	2255	NA	NA	NA	59	NA	NA	NA	NA	left	NA	NA	NA	nationwide children's hospital	case matched methylation control	NA	case matched expression control	tcga-bh-a0bz-f58683	5a5736db-ea1e-47c5-8cdb-335a2a0274ad	canonical - plus	NA	positive	NA	NA	NA	NA	positive	modified radical mastectomy	NA	NA	NA	NA	NA	NA	21	21	NA	NA	-21856	0	0	NA	NA	no	NA
TCGA-BH-A0C0-01A	7875018b-91dc-4ab1-83b0-ee3883e2816e	a0c0	alive	0	1270	NA	NA	NA	62	left	NA	NA	NA	left upper outer quadrant	axillary lymph node dissection alone	NA	NA	nationwide children's hospital	case matched methylation control	germline comparison	case matched expression control	tcga-bh-a0c0-f4518	c4a30038-2c06-4bbc-b071-677aeb2dd359	canonical - plus	NA	positive	NA	NA	NA	NA	positive	other	NA	NA	NA	NA	NA	no	21	16	NA	NA	-23006	0	0	NA	NA	NA	NA
TCGA-BH-A0C1-01A	d10a4887-373b-4726-a61d-126f950e4a06	a0c1	dead	1411	1411	NA	NA	NA	61	NA	NA	NA	NA	right	NA	NA	NA	nationwide children's hospital	NA	NA	NA	tcga-bh-a0c1-f63399	cd476a7d-ddd8-4815-98a8-9f82f7f0d480	canonical	NA	positive	NA	NA	NA	NA	positive	modified radical mastectomy	NA	NA	NA	NA	NA	NA	21	7	NA	NA	-22377	0	0	NA	NA	yes	NA
TCGA-BH-A0C3-01A	7bcf6d42-eb8f-4aa2-825b-38671d4f9e3a	a0c3	alive	0	2709	NA	NA	NA	47	NA	NA	NA	NA	left	NA	NA	NA	nationwide children's hospital	case matched methylation control	NA	case matched expression control	tcga-bh-a0c3-f63533	823d487f-fd80-4797-a129-c63fdf8002bc	canonical - plus	NA	positive	NA	NA	NA	NA	negative	other	NA	NA	NA	NA	NA	NA	21	12	NA	NA	-17221	0	0	NA	NA	no	NA
TCGA-BH-A0C7-01A	e1119732-3e97-4259-bc69-dc4269d9496d	a0c7	alive	0	2767	NA	NA	NA	48	NA	NA	NA	NA	left	NA	NA	NA	nationwide children's hospital	NA	NA	NA	tcga-bh-a0c7-f59178	de59e19c-c2b2-44a8-a313-696dfcdb91ee	canonical	NA	positive	NA	NA	NA	NA	negative	simple mastectomy	NA	NA	NA	NA	NA	NA	21	2	NA	NA	-17871	0	0	NA	NA	no	NA
TCGA-BH-A0DD-01A	dba9beec-5e51-48c0-9229-0ee286a02a1a	a0dd	alive	0	2486	NA	NA	NA	58	NA	NA	NA	NA	right	NA	NA	NA	nationwide children's hospital	NA	NA	case matched expression control	tcga-bh-a0dd-f60386	125c6661-a8f1-4d50-8e0b-28dd4ec98880	canonical - plus	NA	positive	NA	NA	NA	NA	positive	modified radical mastectomy	NA	NA	NA	NA	NA	NA	21	9	NA	NA	-21386	0	0	NA	NA	no	NA
TCGA-BH-A0DE-01A	7f0bbba1-9bc3-45db-bdda-eb3319bb15d2	a0de	alive	0	2372	NA	NA	NA	62	NA	NA	NA	NA	left upper outer quadrant	NA	NA	NA	nationwide children's hospital	germline comparison	NA	case matched methylation control	tcga-bh-a0de-f63543	bc05d1fa-6912-499b-8634-5b1eba26c03a	canonical - plus	NA	positive	NA	NA	NA	NA	positive	other	NA	NA	NA	NA	NA	NA	21	12	NA	NA	-22656	0	0	NA	NA	no	NA
TCGA-BH-A0DG-01A	0bc5744c-5fa3-45bb-87d0-70a02068b392	a0dg	alive	0	2041	NA	NA	NA	30	NA	NA	NA	NA	right upper outer quadrant	NA	NA	NA	nationwide children's hospital	case matched methylation control	NA	case matched expression control	tcga-bh-a0dg-f63658	8c3a54ae-5bd9-4011-ace6-99d5a1d02fe2	canonical - plus	NA	positive	NA	NA	NA	NA	negative	other	NA	NA	NA	NA	NA	NA	21	14	NA	NA	-11204	0	0	NA	NA	no	NA
TCGA-BH-A0DH-01A	491b6364-1223-474f-816f-e248c8c841e2	a0dh	alive	0	1156	NA	NA	NA	63	left	NA	NA	NA	left upper outer quadrant	axillary lymph node dissection alone	NA	NA	nationwide children's hospital	case matched methylation control	germline comparison	case matched expression control	tcga-bh-a0dh-f4529	03118ccf-5575-4cb5-840e-2de55aa5f8fa	canonical - plus	negative	positive	NA	3+	NA	mastectomy nos	positive	other	NA	NA	NA	NA	NA	no	21	16	NA	NA	-23366	0	0	NA	NA	NA	NA
TCGA-BH-A0DI-01A	27ba717a-5cd8-440a-9345-4ae086f6efca	a0di	alive	0	912	NA	NA	NA	63	NA	NA	NA	NA	right	NA	NA	NA	nationwide children's hospital	NA	NA	case matched methylation control	tcga-bh-a0di-f58698	31ad28da-0e4b-4f0d-95bf-e74be74d8070	canonical - plus	NA	positive	NA	NA	NA	NA	positive	modified radical mastectomy	NA	NA	NA	NA	NA	NA	21	22	NA	NA	-23327	0	0	NA	NA	no	NA
TCGA-BH-A0DK-01A	f2bbfa9d-9a9d-4f46-9fde-378e4c44e2ad	a0dk	alive	0	423	NA	NA	NA	49	left	NA	NA	NA	left upper outer quadrant	sentinel node biopsy alone	NA	NA	nationwide children's hospital	case matched methylation control	germline comparison	case matched expression control	tcga-bh-a0dk-f4532	00ada7fd-4cec-4d7c-a86a-bafe4b35fee2	canonical - plus	NA	positive	NA	NA	NA	NA	positive	simple mastectomy	NA	NA	NA	NA	NA	no	21	16	NA	NA	-18237	0	0	NA	NA	NA	NA
TCGA-BH-A0DL-01A	ba39bfbc-5cac-4f6c-b55c-4eee3466ee93	a0dl	alive	0	2381	NA	NA	NA	64	NA	NA	NA	NA	left	NA	NA	NA	nationwide children's hospital	case matched methylation control	germline comparison	case matched expression control	tcga-bh-a0dl-f60389	68e48067-ebc1-4a4c-90f4-73945b7413ad	canonical - plus	NA	positive	NA	NA	NA	NA	negative	other	NA	NA	NA	NA	NA	NA	21	9	NA	NA	-23628	0	0	NA	NA	no	NA
TCGA-BH-A0DP-01A	14267783-5624-4fe5-ba81-9d67f1017474	a0dp	alive	0	476	NA	NA	NA	60	NA	NA	NA	NA	right	sentinel node biopsy alone	NA	NA	nationwide children's hospital	case matched methylation control	germline comparison	case matched expression control	tcga-bh-a0dp-f4538	76e54c1c-f786-46ba-8c0f-d377a4642890	canonical - plus	NA	positive	NA	3+	NA	NA	positive	simple mastectomy	NA	NA	NA	NA	NA	no	21	16	NA	NA	-22199	0	0	NA	NA	NA	NA
TCGA-BH-A0DQ-01A	a851ca14-7bbf-455b-a054-ec03979a4247	a0dq	alive	0	98	NA	NA	NA	42	right	NA	NA	NA	right upper inner quadrant	sentinel lymph node biopsy plus axillary dissection	NA	NA	nationwide children's hospital	case matched methylation control	germline comparison	case matched expression control	tcga-bh-a0dq-f4560	cdba9234-ac86-44d5-a25d-cdfa2e27f36d	canonical - plus	NA	positive	NA	1+	NA	NA	positive	other	NA	NA	NA	NA	NA	no	21	16	NA	NA	-15533	0	0	NA	NA	NA	NA
TCGA-BH-A0DS-01A	fb57c598-b45b-478a-9d34-ca1f050d5b7c	a0ds	alive	0	78	NA	NA	NA	71	right lower inner quadrant	right	NA	NA	right upper inner quadrant	sentinel lymph node biopsy plus axillary dissection	NA	NA	nationwide children's hospital	NA	NA	NA	tcga-bh-a0ds-f4573	2a2365b3-1f58-4bef-b339-62ec3e2df7e0	canonical	NA	positive	NA	2+	NA	NA	positive	other	NA	NA	NA	NA	NA	no	21	16	NA	NA	-25944	0	0	NA	NA	NA	NA
TCGA-BH-A0DT-01A	74f31744-0aed-4633-beec-4e203315f0b7	a0dt	alive	0	2403	NA	NA	NA	41	NA	NA	NA	NA	right	NA	NA	NA	nationwide children's hospital	case matched methylation control	NA	case matched expression control	tcga-bh-a0dt-f59149	547ccd51-6c97-4c0b-9a88-08154fbb4c87	canonical - plus	NA	positive	NA	NA	NA	NA	positive	other	NA	NA	NA	NA	NA	NA	21	1	NA	NA	-15078	0	0	NA	NA	no	NA
TCGA-BH-A0DV-01A	96b9c7db-1be1-4b60-b47c-26b654c3d64c	a0dv	alive	0	2064	NA	NA	NA	54	left lower inner quadrant	left lower outer quadrant	left	NA	left upper inner quadrant	NA	NA	NA	nationwide children's hospital	case matched methylation control	NA	case matched expression control	tcga-bh-a0dv-f63672	39c1b260-0c00-4d1c-93d1-6f57ab835dd1	canonical - plus	NA	positive	NA	NA	NA	NA	positive	modified radical mastectomy	NA	NA	NA	NA	NA	NA	21	15	NA	NA	-19781	0	0	NA	NA	no	NA
TCGA-BH-A0DX-01A	035cb359-eac3-484a-9e88-3ddc739440a3	a0dx	alive	0	2156	NA	NA	NA	62	NA	NA	NA	NA	left upper inner quadrant	NA	NA	NA	nationwide children's hospital	NA	NA	NA	tcga-bh-a0dx-f59135	982b9831-0bbc-4677-99eb-6a34b28d422c	canonical	NA	positive	NA	NA	NA	NA	positive	other	NA	NA	NA	NA	NA	NA	21	1	NA	NA	-22833	0	0	NA	NA	no	NA
TCGA-BH-A0DZ-01A	478eb8aa-50b8-4ce5-98e4-d518ede4b174	a0dz	alive	0	495	NA	NA	NA	43	right upper outer quadrant	right lower inner quadrant	right lower outer quadrant	right	right upper inner quadrant	sentinel lymph node biopsy plus axillary dissection	NA	NA	nationwide children's hospital	case matched methylation control	germline comparison	case matched expression control	tcga-bh-a0dz-f4588	f7218f8f-0d41-4b86-b276-c020ca69412e	canonical - plus	NA	positive	NA	2+	NA	NA	positive	simple mastectomy	NA	NA	NA	NA	NA	no	21	16	NA	NA	-15980	0	0	NA	NA	NA	NA
TCGA-BH-A0E0-01A	20e8106b-1290-4735-abe4-7621e08e3dc8	a0e0	alive	0	134	NA	NA	NA	38	left lower outer quadrant	left	NA	NA	left upper outer quadrant	axillary lymph node dissection alone	NA	NA	nationwide children's hospital	case matched methylation control	germline comparison	case matched expression control	tcga-bh-a0e0-f4603	8ea495c0-4adc-49a9-9235-6d360cb615e2	canonical - plus	NA	negative	NA	0	NA	NA	negative	modified radical mastectomy	NA	NA	NA	NA	NA	no	21	16	NA	NA	-14175	0	0	NA	NA	NA	NA
TCGA-BH-A0E1-01A	606fbc6a-b41b-441d-9401-51e54912bf5e	a0e1	alive	0	477	NA	NA	NA	52	left	NA	NA	NA	left upper inner quadrant	sentinel lymph node biopsy plus axillary dissection	NA	NA	nationwide children's hospital	case matched methylation control	germline comparison	case matched expression control	tcga-bh-a0e1-f4631	cfd1b195-8dd2-421f-b5ec-e88e05b12781	canonical - plus	NA	positive	NA	3+	NA	NA	positive	simple mastectomy	NA	NA	NA	NA	NA	no	21	16	NA	NA	-19192	0	0	NA	NA	NA	NA
TCGA-BH-A0E2-01A	8ace3b8c-f23e-48a9-a137-9e046bd9549b	a0e2	alive	0	435	NA	NA	NA	49	right	NA	NA	NA	right upper inner quadrant	axillary lymph node dissection alone	NA	NA	nationwide children's hospital	NA	NA	NA	tcga-bh-a0e2-f4639	dd8c6d58-8e0a-47a6-beb4-fa08bbc73cf3	canonical	NA	positive	NA	1+	NA	NA	positive	modified radical mastectomy	NA	NA	NA	NA	NA	no	21	16	NA	NA	-18152	0	0	NA	NA	NA	NA
TCGA-BH-A0E6-01A	6c0066e3-96df-4870-bcd3-98cda64082e9	a0e6	alive	0	293	NA	NA	NA	69	left upper outer quadrant	left	NA	NA	left upper inner quadrant	sentinel node biopsy alone	NA	NA	nationwide children's hospital	NA	NA	NA	tcga-bh-a0e6-f4650	57382918-996b-4452-a6ec-6520c9719e12	canonical	NA	negative	NA	0	NA	NA	negative	other	NA	NA	NA	NA	NA	no	21	16	NA	NA	-25408	0	0	NA	NA	NA	NA
TCGA-BH-A0E7-01A	d3b9d925-ae04-4721-8bfc-50b41225bc74	a0e7	alive	0	1363	NA	no	no	79	left	NA	NA	NA	left upper outer quadrant	axillary lymph node dissection alone	NA	NA	nationwide children's hospital	NA	NA	NA	tcga-bh-a0e7-f4656	c4793cfe-2b14-4704-bec5-5e9961e516cd	canonical	NA	positive	NA	3+	NA	NA	positive	other	NA	NA	NA	NA	NA	no	21	16	NA	NA	-29115	0	0	NA	NA	NA	NA
TCGA-BH-A0E9-01A	76ace6aa-0505-442c-978a-f889cf2d44bb	a0e9	alive	0	2489	NA	NA	NA	53	NA	NA	NA	NA	right	NA	NA	NA	nationwide children's hospital	NA	NA	NA	tcga-bh-a0e9-f59107	265b9809-54d2-4df5-8db0-4d44667b3a1e	canonical	NA	positive	NA	NA	NA	NA	positive	modified radical mastectomy	NA	NA	NA	NA	NA	NA	21	1	NA	NA	-19415	0	0	NA	NA	no	NA
TCGA-BH-A0EB-01A	ec6930e5-2d83-435a-9a57-a2c5c22caf02	a0eb	alive	0	745	NA	no	no	69	right	NA	NA	NA	right lower inner quadrant	sentinel lymph node biopsy plus axillary dissection	NA	NA	nationwide children's hospital	NA	NA	NA	tcga-bh-a0eb-f4662	9563674b-70fe-4a30-9db9-85cca3d7bcb6	canonical	NA	positive	NA	3+	NA	NA	positive	other	NA	NA	NA	NA	NA	no	21	16	NA	NA	-25259	0	0	NA	NA	NA	NA
TCGA-BH-A0EE-01A	ca76c6fc-ff30-4833-884d-3a94fe53ff17	a0ee	alive	0	943	NA	no	no	68	right	NA	NA	NA	right upper inner quadrant	sentinel node biopsy alone	NA	NA	nationwide children's hospital	NA	NA	NA	tcga-bh-a0ee-f4674	6f1c8397-cc8c-47da-8266-62801060b148	canonical	NA	negative	NA	0	NA	NA	negative	simple mastectomy	NA	NA	NA	NA	NA	no	21	16	NA	NA	-24850	0	0	NA	NA	NA	NA
TCGA-BH-A0EI-01A	22b35927-1c3f-4f98-ba42-deafc56b677a	a0ei	alive	0	1926	NA	NA	NA	51	NA	NA	NA	NA	right	NA	NA	NA	nationwide children's hospital	NA	NA	NA	tcga-bh-a0ei-f59115	e894dc0c-ae6e-4101-a406-2a464420b984	canonical	NA	positive	NA	NA	NA	NA	positive	other	NA	NA	NA	NA	NA	NA	21	1	NA	NA	-18741	0	0	NA	NA	no	NA
TCGA-BH-A0GY-01A	7d9d3522-ec3b-4efe-8c8e-c0e675276ef5	a0gy	alive	0	923	NA	no	no	67	left	NA	NA	NA	left lower outer quadrant	sentinel lymph node biopsy plus axillary dissection	NA	NA	nationwide children's hospital	NA	NA	NA	tcga-bh-a0gy-f4695	426fca35-2c66-49f8-8a54-d246d2d79d53	canonical	NA	positive	NA	3+	NA	NA	positive	other	NA	NA	NA	NA	NA	no	21	16	NA	NA	-24493	0	0	NA	NA	NA	NA
TCGA-BH-A0GZ-01A	27dfb9d4-3a2c-44bc-9acf-8f638d3f3004	a0gz	alive	0	328	NA	no	no	62	left	NA	NA	NA	left upper inner quadrant	sentinel lymph node biopsy plus axillary dissection	NA	NA	nationwide children's hospital	NA	NA	NA	tcga-bh-a0gz-f4697	6b3fe8b6-3e78-48c6-8ce0-77effd2f5df5	canonical	negative	positive	NA	3+	NA	NA	positive	other	NA	NA	NA	NA	NA	no	21	16	NA	NA	-22714	0	0	NA	NA	NA	NA
TCGA-BH-A0H0-01A	96457ebf-ae88-41f4-97e5-cdc3163418aa	a0h0	alive	0	461	NA	NA	NA	69	right	NA	NA	NA	right upper outer quadrant	sentinel node biopsy alone	NA	NA	nationwide children's hospital	NA	NA	NA	tcga-bh-a0h0-f4704	f6601ba3-50ac-41e2-b50d-cc6128a123b6	canonical	NA	positive	NA	2+	NA	NA	positive	other	NA	NA	NA	NA	NA	no	21	16	NA	NA	-25223	0	0	NA	NA	NA	NA
TCGA-BH-A0H3-01A	6cdc0d53-f813-4101-81e5-9bee68270536	a0h3	alive	0	1928	NA	NA	NA	46	NA	NA	NA	NA	left upper outer quadrant	NA	NA	NA	nationwide children's hospital	NA	NA	NA	tcga-bh-a0h3-f58599	22cc69f7-3445-4524-a216-80f457933e1a	canonical	NA	positive	NA	NA	NA	NA	positive	other	NA	NA	NA	NA	NA	NA	21	15	NA	NA	-17152	0	0	NA	NA	no	NA
TCGA-BH-A0H5-01A	cab38ea8-4555-413c-b81e-4621aac4ef85	a0h5	alive	0	1620	NA	NA	NA	45	NA	NA	NA	NA	right upper outer quadrant	NA	NA	NA	nationwide children's hospital	case matched methylation control	germline comparison	case matched expression control	tcga-bh-a0h5-f58727	6c579d1f-0a86-4bc6-9c10-e56a23cde9fb	canonical - plus	NA	positive	NA	NA	NA	NA	positive	other	NA	NA	NA	NA	NA	NA	21	22	NA	NA	-16719	0	0	NA	NA	no	NA
TCGA-BH-A0H6-01A	aeb6a3a6-b57a-4c53-90e6-e833777dd2a1	a0h6	alive	0	747	NA	NA	NA	82	right upper outer quadrant	right	NA	NA	right upper inner quadrant	no axillary staging	NA	NA	nationwide children's hospital	NA	NA	NA	tcga-bh-a0h6-f4711	529564a6-8e4a-4b86-a79c-43009e0ab551	canonical	NA	positive	NA	3+	NA	NA	positive	other	NA	NA	NA	NA	NA	no	21	16	NA	NA	-30125	0	0	NA	NA	NA	NA
TCGA-BH-A0H7-01A	2021ed1f-dc75-4701-b8b8-1386466e4802	a0h7	alive	0	702	NA	NA	NA	65	right upper outer quadrant	right lower inner quadrant	right lower outer quadrant	right	right upper inner quadrant	axillary lymph node dissection alone	NA	NA	nationwide children's hospital	case matched methylation control	germline comparison	case matched expression control	tcga-bh-a0h7-f4737	a652b449-0747-4a34-b758-a6e67a1000f6	canonical - plus	NA	positive	NA	2+	NA	NA	positive	modified radical mastectomy	NA	NA	NA	NA	NA	no	21	16	NA	NA	-23972	0	0	NA	NA	NA	NA
TCGA-BH-A0H9-01A	0f64edec-0f1f-4025-8a53-75f9534f7828	a0h9	alive	0	1247	NA	NA	NA	69	right	NA	NA	NA	right upper outer quadrant	sentinel node biopsy alone	NA	NA	nationwide children's hospital	case matched methylation control	germline comparison	case matched expression control	tcga-bh-a0h9-f4703	f47167af-0722-4448-88dc-80918df82e28	canonical - plus	NA	positive	NA	1+	NA	NA	positive	other	NA	NA	NA	NA	NA	no	21	16	NA	NA	-25289	0	0	NA	NA	NA	NA
TCGA-BH-A0HA-01A	e666081b-caaf-4e8b-9446-807be71201a5	a0ha	alive	0	1611	NA	NA	NA	31	NA	NA	NA	NA	right	NA	NA	NA	nationwide children's hospital	case matched methylation control	NA	case matched expression control	tcga-bh-a0ha-f43320	3bfd818a-cf1f-4459-9b36-7cad9d475d5b	canonical - plus	NA	positive	NA	NA	NA	NA	positive	other	NA	NA	NA	NA	NA	NA	21	17	NA	NA	-11379	0	0	NA	NA	no	NA
TCGA-BH-A0HB-01A	0c1023c0-d2ce-4940-8047-7642f1dc3965	a0hb	alive	0	806	NA	NA	NA	55	right	NA	NA	NA	right upper outer quadrant	sentinel node biopsy alone	NA	NA	nationwide children's hospital	NA	NA	NA	tcga-bh-a0hb-f4718	557df182-2e69-4738-aaff-52d3be340928	canonical	NA	positive	NA	1+	NA	NA	positive	other	NA	NA	NA	NA	NA	no	21	16	NA	NA	-20448	0	0	NA	NA	NA	NA
TCGA-BH-A0HF-01A	17ca61a2-607a-45ff-88fa-ef72e80bf891	a0hf	alive	0	727	NA	NA	NA	77	right	NA	NA	NA	right upper outer quadrant	sentinel node biopsy alone	NA	NA	nationwide children's hospital	NA	NA	NA	tcga-bh-a0hf-f4734	61bfa455-749f-42a0-9883-8ecfc203b71b	canonical	NA	positive	NA	1+	NA	NA	positive	other	NA	NA	NA	NA	NA	no	21	16	NA	NA	-28233	0	0	NA	NA	NA	NA
TCGA-BH-A0HI-01A	e0375a8b-a135-4103-a59d-39063fcf4a6f	a0hi	alive	0	620	NA	NA	NA	78	right lower inner quadrant	right	NA	NA	right upper inner quadrant	sentinel node biopsy alone	NA	NA	nationwide children's hospital	NA	NA	NA	tcga-bh-a0hi-f4756	0729b5ee-c7f0-4f0a-9f04-4a7e417515fc	canonical	NA	positive	NA	1+	NA	NA	positive	other	NA	NA	NA	NA	NA	yes	21	16	NA	NA	-28644	0	0	NA	NA	NA	NA
TCGA-BH-A0HK-01A	24334ac1-28a3-4b61-b590-3f51e375b247	a0hk	alive	0	178	NA	NA	NA	81	right	NA	NA	NA	right upper inner quadrant	axillary lymph node dissection alone	NA	NA	nationwide children's hospital	case matched methylation control	germline comparison	case matched expression control	tcga-bh-a0hk-f4758	f754a354-2afa-4e66-8b81-540a812e244c	canonical - plus	NA	positive	NA	0	NA	NA	negative	modified radical mastectomy	NA	NA	NA	NA	NA	no	21	16	NA	NA	-29751	0	0	NA	NA	NA	NA
TCGA-BH-A0HL-01A	602083f0-18d9-48b6-a529-31e165c54b37	a0hl	alive	0	72	NA	NA	NA	56	right lower outer quadrant	right	NA	NA	right lower inner quadrant	sentinel lymph node biopsy plus axillary dissection	NA	NA	nationwide children's hospital	NA	NA	NA	tcga-bh-a0hl-f4792	ae1f5d23-cbc5-4bc8-9b75-9ec9624a5e34	canonical	NA	positive	NA	3+	NA	NA	positive	modified radical mastectomy	NA	NA	NA	NA	NA	no	21	16	NA	NA	-20804	0	0	NA	NA	NA	NA
TCGA-BH-A0HN-01A	a68a3361-48b4-4bd0-999d-b4cc3d43eb4a	a0hn	alive	0	516	NA	NA	NA	67	left upper outer quadrant	left	NA	NA	left upper inner quadrant	sentinel node biopsy alone	NA	NA	nationwide children's hospital	NA	NA	NA	tcga-bh-a0hn-f4811	979c6837-237a-4101-b902-fbdc71c7c474	canonical	negative	positive	NA	3+	NA	mastectomy nos	positive	other	NA	NA	NA	NA	NA	no	21	16	NA	NA	-24731	0	0	NA	NA	NA	NA
TCGA-BH-A0HO-01A	8332806e-f547-4aae-89af-6d5bec831fd2	a0ho	alive	0	76	NA	NA	NA	48	right	NA	NA	NA	right upper outer quadrant	sentinel lymph node biopsy plus axillary dissection	NA	NA	nationwide children's hospital	NA	NA	NA	tcga-bh-a0ho-f4771	58e9756a-3f14-478e-8cf9-bffb29089102	canonical	NA	positive	NA	3+	NA	NA	positive	other	NA	NA	NA	NA	NA	yes	21	16	NA	NA	-17710	0	0	NA	NA	NA	NA
TCGA-BH-A0HP-01A	fcef8cb5-fb2c-4bfb-82cd-6b9f3145182c	a0hp	alive	0	414	NA	NA	NA	65	left upper outer quadrant	left lower inner quadrant	left lower outer quadrant	left	left upper inner quadrant	axillary lymph node dissection alone	NA	NA	nationwide children's hospital	NA	NA	NA	tcga-bh-a0hp-f4784	dd04d583-3871-4317-908d-8edd22a879b7	canonical	NA	positive	NA	0	NA	NA	negative	modified radical mastectomy	NA	NA	NA	NA	NA	no	21	16	NA	NA	-23883	0	0	NA	NA	NA	NA
TCGA-BH-A0HQ-01A	f31c21b6-0f7f-435b-9e24-97c909755c36	a0hq	alive	0	1121	NA	NA	NA	56	left	NA	NA	NA	left upper outer quadrant	sentinel node biopsy alone	NA	NA	nationwide children's hospital	NA	NA	NA	tcga-bh-a0hq-f4795	3116f5da-e215-4e25-808d-988778a6b552	canonical	NA	positive	NA	3+	NA	NA	positive	other	NA	NA	NA	NA	NA	yes	21	16	NA	NA	-20719	0	0	NA	NA	NA	NA
TCGA-BH-A0HU-01A	dc657ca8-98e8-4ec4-a513-1b848be0e85d	a0hu	alive	0	392	NA	NA	NA	52	right	NA	NA	NA	right upper outer quadrant	sentinel node biopsy alone	NA	NA	nationwide children's hospital	NA	NA	NA	tcga-bh-a0hu-f4813	40f5f2c3-261e-4b28-acd9-b4999afb0205	canonical	NA	positive	NA	2+	NA	NA	positive	other	NA	NA	NA	NA	NA	no	21	16	NA	NA	-19216	0	0	NA	NA	NA	NA
TCGA-BH-A0HW-01A	29fdc464-f216-4828-b456-829f71436e27	a0hw	alive	0	1561	NA	NA	NA	62	left lower outer quadrant	left	NA	NA	left lower inner quadrant	sentinel node biopsy alone	NA	NA	nationwide children's hospital	NA	NA	NA	tcga-bh-a0hw-f4827	d8ad2e6a-f00c-40b6-a939-5fd2230faba9	canonical	NA	positive	NA	0	NA	NA	negative	other	NA	NA	NA	NA	NA	no	21	16	NA	NA	-22962	0	0	NA	NA	NA	NA
TCGA-BH-A0HX-01A	3b01d064-8c00-4972-9f07-407eac8e7534	a0hx	alive	0	829	NA	NA	NA	54	left upper outer quadrant	left lower inner quadrant	left lower outer quadrant	left	left upper inner quadrant	sentinel lymph node biopsy plus axillary dissection	NA	NA	nationwide children's hospital	NA	NA	NA	tcga-bh-a0hx-f4838	477758cf-349a-441f-b63c-93c9677d3415	canonical	NA	positive	NA	3+	NA	NA	positive	simple mastectomy	NA	NA	NA	NA	NA	yes	21	16	NA	NA	-19900	0	0	NA	NA	NA	NA
TCGA-BH-A0HY-01A	844ad251-3ee4-42f6-ad00-59a7a1670eea	a0hy	alive	0	1545	NA	NA	NA	60	NA	NA	NA	NA	left	NA	NA	NA	nationwide children's hospital	NA	NA	NA	tcga-bh-a0hy-f43316	42f0e658-c564-4bfe-bc03-51bba0021726	canonical	NA	positive	NA	NA	NA	NA	negative	other	NA	NA	NA	NA	NA	NA	21	16	NA	NA	-22179	0	0	NA	NA	no	NA
TCGA-BH-A0RX-01A	e828455d-4680-41b2-8a1c-1582e3790d62	a0rx	alive	0	170	NA	NA	NA	59	left	NA	NA	NA	left upper outer quadrant	sentinel node biopsy alone	NA	NA	nationwide children's hospital	NA	NA	NA	tcga-bh-a0rx-f4875	4cfeecd1-12bc-496c-9b8e-2e006f072a1e	canonical	NA	negative	NA	0	NA	NA	negative	other	NA	NA	NA	NA	NA	no	21	16	NA	NA	-21857	0	0	NA	NA	NA	NA
TCGA-BH-A0W3-01A	3c612e12-6de8-44fa-a095-805c45474821	a0w3	alive	0	728	NA	NA	NA	58	NA	NA	NA	NA	left upper inner quadrant	NA	NA	NA	nationwide children's hospital	NA	NA	NA	tcga-bh-a0w3-f34065	0c4daf8c-f0ca-4e03-9f35-21e17062eceb	canonical	NA	positive	NA	NA	NA	NA	positive	other	NA	NA	NA	NA	NA	NA	21	29	NA	NA	-21369	0	0	NA	NA	NA	NA
TCGA-BH-A0W4-01A	0772cdbe-8b0d-452b-8df1-bd70d1306363	a0w4	alive	0	759	NA	NA	NA	46	NA	NA	NA	NA	left upper outer quadrant	NA	NA	NA	nationwide children's hospital	NA	NA	NA	tcga-bh-a0w4-f34069	a10ffd93-e9c3-4083-a4e6-f61d9e83e9c9	canonical	NA	positive	NA	NA	NA	NA	positive	other	NA	NA	NA	NA	NA	NA	21	29	NA	NA	-16911	0	0	NA	NA	NA	NA
TCGA-BH-A0W5-01A	da9c10ea-c13f-4d88-8b94-a0cbc106d036	a0w5	alive	0	1288	NA	NA	NA	77	NA	NA	NA	NA	left	sentinel lymph node biopsy plus axillary dissection	NA	NA	nationwide children's hospital	NA	NA	NA	tcga-bh-a0w5-f34070	82d27fd8-ed77-4388-9c3f-711edcef3a4d	canonical	NA	positive	NA	NA	NA	NA	positive	other	NA	NA	NA	NA	NA	NA	21	29	NA	NA	-28304	0	0	NA	NA	NA	NA
TCGA-BH-A0W7-01A	9f80649b-a249-4fb5-97ad-059a30e13fea	a0w7	alive	0	1363	NA	NA	NA	49	NA	NA	NA	NA	left upper outer quadrant	sentinel node biopsy alone	NA	NA	nationwide children's hospital	NA	NA	NA	tcga-bh-a0w7-f34073	f6b25172-02c5-489e-9061-b951ee902cb0	canonical	NA	positive	NA	NA	NA	NA	positive	other	NA	NA	NA	NA	NA	NA	21	29	NA	NA	-17996	0	0	NA	NA	NA	NA
TCGA-BH-A0WA-01A	786e8dbe-442e-4551-87b3-b4c333b04dd4	a0wa	alive	0	701	NA	NA	NA	82	NA	NA	NA	NA	right upper outer quadrant	axillary lymph node dissection alone	NA	NA	nationwide children's hospital	NA	NA	NA	tcga-bh-a0wa-f34068	b26aa90b-6d51-4807-902f-8e6b2e695140	canonical	NA	negative	NA	NA	NA	NA	negative	other	NA	NA	NA	NA	NA	NA	21	29	NA	NA	-30025	0	0	NA	NA	NA	NA
TCGA-BH-A18F-01A	bfd49783-1767-469b-9d79-7822301c5efc	a18f	alive	0	1001	NA	NA	NA	50	NA	NA	NA	NA	right lower outer quadrant	sentinel node biopsy alone	NA	NA	nationwide children's hospital	NA	NA	case matched methylation control	tcga-bh-a18f-f59193	092e4639-8456-481d-8df3-0c60e99cdcb5	canonical - plus	NA	positive	3 point scale	3+	3 point scale	NA	positive	other	NA	NA	NA	NA	NA	NA	21	2	NA	NA	-18594	0	0	NA	NA	NA	NA
TCGA-BH-A18G-01A	747083ff-0703-431b-aad4-f2adff739516	a18g	alive	0	149	NA	NA	NA	81	NA	NA	NA	NA	right	sentinel lymph node biopsy plus axillary dissection	NA	NA	nationwide children's hospital	NA	NA	NA	tcga-bh-a18g-f64216	112ba8bf-77d2-4e83-aafe-9fabf7ec76ca	canonical	NA	negative	NA	NA	NA	NA	negative	other	NA	NA	NA	NA	NA	NA	21	27	NA	NA	-29820	0	0	NA	NA	NA	NA
TCGA-BH-A18I-01A	9c1ceb7d-6fed-4c2f-a89a-bf3c5b15ca58	a18i	alive	0	1093	NA	NA	NA	53	NA	NA	NA	NA	left upper outer quadrant	sentinel node biopsy alone	NA	NA	nationwide children's hospital	NA	NA	NA	tcga-bh-a18i-f58710	fdfeec48-b8f2-49ee-b102-ccf1754e0818	canonical	negative	positive	NA	NA	NA	modified radical mastectomy	positive	other	NA	NA	NA	NA	NA	NA	21	22	NA	NA	-19489	0	0	NA	NA	NA	NA
TCGA-BH-A18J-01A	cc074b7f-d3b2-4880-902e-bf10e667b665	a18j	dead	612	612	NA	NA	NA	56	NA	NA	NA	NA	right	NA	NA	NA	nationwide children's hospital	case matched methylation control	NA	case matched expression control	NA	NA	canonical - plus	NA	positive	NA	NA	NA	NA	positive	modified radical mastectomy	NA	NA	NA	NA	NA	NA	21	8	NA	NA	-20678	0	0	NA	NA	yes	NA
TCGA-BH-A18K-01A	50619f8c-10aa-464a-a227-90a7aa6ffd43	a18k	dead	2763	2763	NA	NA	NA	46	NA	NA	NA	NA	left lower inner quadrant	sentinel lymph node biopsy plus axillary dissection	NA	NA	nationwide children's hospital	case matched methylation control	NA	case matched expression control	NA	NA	canonical - plus	NA	positive	NA	NA	NA	NA	positive	other	NA	NA	NA	NA	NA	NA	21	9	NA	NA	-16824	0	0	NA	NA	no	NA
TCGA-BH-A18L-01A	9ddc3e7b-8b54-4a83-8335-8053940f56c1	a18l	dead	811	811	NA	NA	NA	50	NA	NA	NA	NA	left upper outer quadrant	sentinel node biopsy alone	NA	NA	nationwide children's hospital	case matched methylation control	NA	case matched expression control	NA	NA	canonical - plus	NA	positive	NA	NA	NA	NA	positive	other	NA	NA	NA	NA	NA	NA	21	9	NA	NA	-18519	0	0	NA	NA	no	NA
TCGA-BH-A18M-01A	f63722c1-a0bb-4bf9-8a10-1d76a8e1a0ba	a18m	dead	2207	2207	NA	NA	NA	39	NA	NA	NA	NA	left upper inner quadrant	NA	NA	NA	nationwide children's hospital	case matched methylation control	NA	case matched expression control	NA	NA	canonical - plus	NA	positive	NA	NA	NA	NA	positive	modified radical mastectomy	NA	NA	NA	NA	NA	NA	21	15	NA	NA	-14532	0	0	NA	NA	no	NA
TCGA-BH-A18N-01A	665dd3d3-779c-4abd-b5d7-13342340451d	a18n	dead	1148	1148	NA	NA	NA	88	NA	NA	NA	NA	left	axillary lymph node dissection alone	NA	NA	nationwide children's hospital	case matched methylation control	NA	case matched expression control	tcga-bh-a18n-f59153	2f3d622e-63f7-4090-9d6f-974aa4a2ccab	canonical - plus	NA	positive	NA	NA	NA	NA	positive	modified radical mastectomy	NA	NA	NA	NA	NA	NA	21	1	NA	NA	-32404	0	0	NA	NA	no	NA
TCGA-BH-A18P-01A	557cb0a3-6f1b-4faf-8296-0a15c24158f9	a18p	dead	921	921	NA	NA	NA	60	NA	NA	NA	NA	left lower inner quadrant	sentinel node biopsy alone	NA	NA	nationwide children's hospital	case matched methylation control	NA	case matched expression control	NA	NA	canonical - plus	NA	positive	NA	NA	NA	NA	negative	simple mastectomy	NA	NA	NA	NA	NA	NA	21	22	NA	NA	-22222	0	0	NA	NA	NA	NA
TCGA-BH-A18Q-01A	db4bc6aa-2e7d-4bcb-8519-a455f624d33b	a18q	dead	1692	1692	NA	NA	NA	56	NA	NA	NA	NA	left	axillary lymph node dissection alone	NA	NA	nationwide children's hospital	case matched methylation control	NA	case matched expression control	NA	NA	canonical - plus	NA	negative	NA	NA	NA	NA	negative	modified radical mastectomy	NA	NA	NA	NA	NA	NA	21	24	NA	NA	-20675	0	0	NA	NA	NA	NA
TCGA-BH-A18R-01A	f6e1ec78-5ad9-4879-9b7e-262d17b166ad	a18r	dead	1142	1142	NA	NA	NA	50	NA	NA	NA	NA	right upper outer quadrant	NA	NA	NA	nationwide children's hospital	case matched methylation control	NA	case matched expression control	NA	NA	canonical - plus	NA	indeterminate	NA	NA	NA	NA	negative	modified radical mastectomy	NA	NA	NA	NA	NA	NA	21	3	NA	NA	-18524	0	0	NA	NA	no	NA
TCGA-BH-A18S-01A	433427a1-bacf-4381-91ba-5fec8a0953f9	a18s	dead	2009	2009	NA	NA	NA	79	NA	NA	NA	NA	right lower inner quadrant	sentinel node biopsy alone	NA	NA	nationwide children's hospital	case matched methylation control	NA	case matched expression control	NA	NA	canonical - plus	NA	positive	NA	NA	NA	NA	positive	other	NA	NA	NA	NA	NA	NA	21	2	NA	NA	-28974	0	0	NA	NA	NA	NA
TCGA-BH-A18T-01A	30ec8b1f-28c4-4f46-8a1b-a8d51e558c7d	a18t	dead	224	224	NA	NA	NA	70	NA	NA	NA	NA	right upper outer quadrant	sentinel node biopsy alone	NA	NA	nationwide children's hospital	NA	NA	NA	NA	NA	canonical	NA	negative	NA	NA	NA	NA	negative	other	NA	NA	NA	NA	NA	NA	21	2	NA	NA	-25674	0	0	NA	NA	NA	NA
TCGA-BH-A18U-01A	233b02f3-c4f0-4a67-9db5-e68d5cdaccb6	a18u	dead	1563	1563	NA	NA	NA	72	NA	NA	NA	NA	left	sentinel lymph node biopsy plus axillary dissection	NA	NA	nationwide children's hospital	case matched methylation control	NA	case matched expression control	NA	NA	canonical - plus	NA	positive	NA	NA	NA	NA	positive	other	NA	NA	NA	NA	NA	NA	21	2	NA	NA	-26426	0	0	NA	NA	NA	NA
TCGA-BH-A18V-01A	6b960b58-28e1-41c6-bd6e-7e669c6aa4ef	a18v	dead	1556	1556	NA	NA	NA	48	NA	NA	NA	NA	right	axillary lymph node dissection alone	NA	NA	nationwide children's hospital	NA	NA	primary tumor and metastatic tumor(s)	NA	NA	canonical - plus	NA	negative	NA	NA	NA	NA	negative	other	NA	NA	NA	NA	NA	NA	21	2	NA	NA	-17682	0	0	NA	NA	yes	NA
TCGA-BH-A1EN-01A	858652b8-c4c2-41d8-be32-fdc88e1a7bb0	a1en	dead	2127	2127	NA	NA	NA	78	NA	NA	NA	NA	right	NA	NA	NA	nationwide children's hospital	case matched methylation control	NA	case matched expression control	NA	NA	canonical - plus	NA	negative	NA	NA	NA	NA	negative	other	NA	NA	NA	NA	NA	NA	21	3	NA	NA	-28724	0	0	NA	NA	no	NA
TCGA-BH-A1EO-01A	4510295e-8aa7-4ef1-b2b7-91cc902f8200	a1eo	dead	2798	2798	NA	NA	NA	68	NA	NA	NA	NA	right	NA	NA	NA	nationwide children's hospital	case matched methylation control	NA	case matched expression control	NA	NA	canonical - plus	NA	positive	NA	NA	NA	NA	positive	other	NA	NA	NA	NA	NA	NA	21	6	NA	NA	-25136	0	0	NA	NA	no	NA
TCGA-BH-A1ES-01A	51ccbf1b-7cae-44ba-991a-11eda8b8c404	a1es	dead	3462	3462	NA	NA	NA	35	NA	NA	NA	NA	right upper inner quadrant	NA	NA	NA	nationwide children's hospital	NA	NA	primary tumor and metastatic tumor(s)	NA	NA	canonical - plus	NA	positive	NA	NA	NA	NA	positive	other	NA	NA	NA	NA	NA	NA	21	6	NA	NA	-13138	0	0	NA	NA	no	NA
TCGA-BH-A1ET-01A	8986a141-eae7-4157-b695-02cc6fc3b071	a1et	dead	2520	2520	NA	NA	NA	55	NA	NA	NA	NA	left	NA	NA	NA	nationwide children's hospital	case matched methylation control	NA	case matched expression control	NA	NA	canonical - plus	NA	positive	NA	NA	NA	NA	positive	other	NA	NA	NA	NA	NA	NA	21	7	NA	NA	-20425	0	0	NA	NA	NA	NA
TCGA-BH-A1EU-01A	a1093598-d3a8-4ffe-83fc-bc7d1faff7e5	a1eu	dead	1286	1286	NA	NA	NA	83	NA	NA	NA	NA	right	NA	NA	NA	nationwide children's hospital	case matched methylation control	NA	case matched expression control	NA	NA	canonical - plus	NA	positive	NA	NA	NA	NA	positive	NA	NA	NA	NA	NA	NA	NA	21	7	NA	NA	-30339	0	0	NA	NA	NA	NA
TCGA-BH-A1EV-01A	417dea5f-f68e-4dab-940e-43ae8c67e5e6	a1ev	dead	365	365	NA	NA	NA	45	NA	NA	NA	NA	left	NA	NA	NA	nationwide children's hospital	case matched methylation control	NA	case matched expression control	tcga-bh-a1ev-f59154	6934f0ba-fa6d-4451-9935-e84f316dc61a	canonical - plus	NA	positive	NA	NA	NA	NA	positive	modified radical mastectomy	NA	NA	NA	NA	NA	NA	21	1	NA	NA	-16504	0	0	NA	NA	NA	NA
TCGA-BH-A1EW-01A	9d166970-07c8-4ca3-9cfa-ed0049df9ecc	a1ew	dead	1694	1694	NA	NA	NA	38	NA	NA	NA	NA	left upper outer quadrant	NA	NA	NA	nationwide children's hospital	case matched methylation control	NA	case matched expression control	NA	NA	canonical - plus	NA	negative	NA	NA	NA	NA	negative	other	NA	NA	NA	NA	NA	NA	21	7	NA	NA	-14090	0	0	NA	NA	NA	NA
TCGA-BH-A1EX-01A	7b892055-c59d-4550-8688-ad039790af3d	a1ex	dead	1508	1508	NA	NA	NA	67	NA	NA	NA	NA	right lower inner quadrant	NA	NA	NA	nationwide children's hospital	NA	NA	NA	NA	NA	canonical	NA	positive	NA	NA	NA	NA	positive	other	NA	NA	NA	NA	NA	NA	21	7	NA	NA	-24544	0	0	NA	NA	NA	NA
TCGA-BH-A1EY-01A	0741b5db-4405-42ba-b63a-c6ee4f341480	a1ey	dead	538	538	NA	NA	NA	79	NA	NA	NA	NA	left upper outer quadrant	NA	NA	NA	nationwide children's hospital	NA	NA	case matched methylation control	tcga-bh-a1ey-f59173	4ad593dc-bd2c-44d2-a851-a2b13659db85	canonical - plus	NA	positive	NA	NA	NA	NA	positive	modified radical mastectomy	NA	NA	NA	NA	NA	NA	21	2	NA	NA	-28940	0	0	NA	NA	NA	NA
TCGA-BH-A1F0-01A	21ef1730-e5a7-47ce-b419-d000bb59ae15	a1f0	dead	785	785	NA	NA	NA	80	NA	NA	NA	NA	left	NA	NA	NA	nationwide children's hospital	case matched methylation control	NA	case matched expression control	NA	NA	canonical - plus	NA	negative	NA	NA	NA	NA	indeterminate	modified radical mastectomy	NA	NA	NA	NA	NA	NA	21	7	NA	NA	-29335	0	0	NA	NA	NA	NA
TCGA-BH-A1F2-01A	6a2972e3-cca9-47e5-aac0-b770f2399eeb	a1f2	dead	959	959	NA	NA	NA	53	NA	NA	NA	NA	left	NA	NA	NA	nationwide children's hospital	case matched methylation control	NA	case matched expression control	NA	NA	canonical - plus	NA	positive	NA	NA	NA	NA	positive	modified radical mastectomy	NA	NA	NA	NA	NA	NA	21	7	NA	NA	-19701	0	0	NA	NA	NA	NA
TCGA-BH-A1F6-01A	ad18820b-a804-49c0-ba8a-86c09fa6bce2	a1f6	dead	2965	2965	NA	NA	NA	51	NA	NA	NA	NA	left	NA	NA	NA	nationwide children's hospital	case matched methylation control	NA	case matched expression control	NA	NA	canonical - plus	NA	negative	NA	NA	NA	NA	negative	modified radical mastectomy	NA	NA	NA	NA	NA	NA	21	7	NA	NA	-18691	0	0	NA	NA	NA	NA
TCGA-BH-A1F8-01A	ee554215-bea2-4268-aaf9-784e68cdb969	a1f8	dead	763	763	NA	NA	NA	90	NA	NA	NA	NA	left	NA	NA	NA	nationwide children's hospital	case matched methylation control	NA	case matched expression control	NA	NA	canonical - plus	NA	positive	NA	NA	NA	NA	positive	modified radical mastectomy	NA	NA	NA	NA	NA	NA	21	7	NA	NA	-32871	0	0	NA	NA	NA	NA
TCGA-BH-A1FB-01A	ecab16bc-28d5-4c3a-8735-3c785bd047c4	a1fb	dead	3669	3669	NA	NA	NA	60	NA	NA	NA	NA	right	NA	NA	NA	nationwide children's hospital	case matched methylation control	NA	case matched expression control	NA	NA	canonical - plus	NA	positive	NA	NA	NA	NA	positive	NA	NA	NA	NA	NA	NA	NA	21	7	NA	NA	-21933	0	0	NA	NA	NA	NA
TCGA-BH-A1FC-01A	b97bf89a-7a85-4eef-ae7e-f787aead1f0a	a1fc	dead	3472	3472	NA	NA	NA	78	NA	NA	NA	NA	right upper outer quadrant	NA	NA	NA	nationwide children's hospital	case matched methylation control	NA	case matched expression control	NA	NA	canonical - plus	NA	negative	NA	NA	NA	NA	negative	other	NA	NA	NA	NA	NA	NA	21	8	NA	NA	-28706	0	0	NA	NA	NA	NA
TCGA-BH-A1FD-01A	3c8b5af9-c34d-43c2-b8c9-39ea11e44fa6	a1fd	dead	1009	1009	NA	NA	NA	68	NA	NA	NA	NA	left	NA	NA	NA	nationwide children's hospital	case matched methylation control	NA	case matched expression control	NA	NA	canonical - plus	NA	positive	NA	NA	NA	NA	positive	NA	NA	NA	NA	NA	NA	NA	21	8	NA	NA	-24940	0	0	NA	NA	NA	NA
TCGA-BH-A1FE-01A	4aa68586-6331-4795-b40c-859386640df6	a1fe	dead	2273	2273	NA	NA	NA	31	NA	NA	NA	NA	left	NA	NA	NA	nationwide children's hospital	NA	NA	primary tumor and metastatic tumor(s)	NA	NA	canonical - plus	NA	positive	NA	NA	NA	NA	positive	modified radical mastectomy	NA	NA	NA	NA	NA	NA	21	8	NA	NA	-11650	0	0	NA	NA	NA	NA
TCGA-BH-A1FG-01A	d4e7426c-9739-4585-9114-e564b13c7c02	a1fg	dead	3736	3736	NA	NA	NA	88	NA	NA	NA	NA	left	NA	NA	NA	nationwide children's hospital	case matched methylation control	NA	case matched expression control	NA	NA	canonical - plus	NA	positive	NA	NA	NA	NA	positive	other	NA	NA	NA	NA	NA	NA	21	8	NA	NA	-32295	0	0	NA	NA	NA	NA
TCGA-BH-A1FH-01A	1783cac1-253a-40af-a9ac-48dfb20e1ab8	a1fh	dead	1034	1034	NA	NA	NA	47	NA	NA	NA	NA	left upper outer quadrant	NA	NA	NA	nationwide children's hospital	case matched methylation control	NA	case matched expression control	NA	NA	canonical - plus	NA	positive	NA	NA	NA	NA	negative	modified radical mastectomy	NA	NA	NA	NA	NA	NA	21	8	NA	NA	-17172	0	0	NA	NA	yes	NA
TCGA-BH-A1FJ-01A	f6581eee-61b9-43d4-ab0d-ce5ce3ba1c74	a1fj	dead	1927	1927	NA	NA	NA	66	NA	NA	NA	NA	right upper outer quadrant	NA	NA	NA	nationwide children's hospital	case matched methylation control	NA	case matched expression control	NA	NA	canonical - plus	NA	negative	NA	NA	NA	NA	positive	modified radical mastectomy	NA	NA	NA	NA	NA	NA	21	8	NA	NA	-24262	0	0	NA	NA	NA	NA
TCGA-BH-A1FL-01A	14d1d84e-99e1-41ad-8892-3b4da3d4f948	a1fl	dead	1673	1673	NA	NA	NA	69	NA	NA	NA	NA	left upper outer quadrant	NA	NA	NA	nationwide children's hospital	NA	NA	NA	NA	NA	canonical	NA	positive	NA	NA	NA	NA	positive	other	NA	NA	NA	NA	NA	NA	21	8	NA	NA	-25558	0	0	NA	NA	NA	NA
TCGA-BH-A1FM-01A	7eb18190-5a41-4637-9783-f81bbde499e4	a1fm	dead	1388	1388	NA	NA	NA	44	NA	NA	NA	NA	right upper outer quadrant	NA	NA	NA	nationwide children's hospital	case matched methylation control	NA	case matched expression control	NA	NA	canonical - plus	NA	positive	NA	NA	NA	NA	negative	modified radical mastectomy	NA	NA	NA	NA	NA	NA	21	8	NA	NA	-16289	0	0	NA	NA	NA	NA
TCGA-BH-A1FN-01A	6dd0dd7b-62ff-4fd1-a99a-b265f1a91dca	a1fn	dead	2192	2192	NA	NA	NA	34	NA	NA	NA	NA	right upper outer quadrant	NA	NA	NA	nationwide children's hospital	case matched methylation control	NA	case matched expression control	NA	NA	canonical - plus	NA	positive	NA	NA	NA	NA	positive	other	NA	NA	NA	NA	NA	NA	21	8	NA	NA	-12525	0	0	NA	NA	NA	NA
TCGA-BH-A1FR-01A	bf3b1481-ae31-4406-b084-b6cc1d7163e3	a1fr	dead	1642	1642	NA	NA	NA	73	NA	NA	NA	NA	right upper inner quadrant	NA	NA	NA	nationwide children's hospital	case matched methylation control	NA	case matched expression control	NA	NA	canonical - plus	NA	positive	NA	NA	NA	NA	positive	other	NA	NA	NA	NA	NA	NA	21	8	NA	NA	-26684	0	0	NA	NA	NA	NA
TCGA-BH-A1FU-01A	c348a9b3-c901-4384-a222-144387bac0c5	a1fu	dead	1688	1688	NA	NA	NA	44	NA	NA	NA	NA	right upper outer quadrant	NA	NA	NA	nationwide children's hospital	case matched methylation control	NA	case matched expression control	NA	NA	canonical - plus	NA	negative	NA	NA	NA	NA	negative	modified radical mastectomy	NA	NA	NA	NA	NA	NA	21	8	NA	NA	-16174	0	0	NA	NA	NA	NA
TCGA-BH-A201-01A	3bf81a9f-abb4-4495-a514-fd3865e13a03	a201	alive	0	856	NA	NA	NA	64	NA	NA	NA	NA	left	NA	NA	NA	nationwide children's hospital	NA	NA	NA	tcga-bh-a201-f64222	d0597150-e8c6-47dc-a8b9-bd013573e573	canonical	NA	positive	NA	NA	NA	NA	positive	other	NA	NA	NA	NA	NA	NA	21	27	NA	NA	-23423	0	0	NA	NA	NA	NA
TCGA-BH-A202-01A	e7a00d67-2c26-4d1f-bd17-35f659e88bc1	a202	alive	0	795	NA	NA	NA	60	NA	NA	NA	NA	left	NA	NA	NA	nationwide children's hospital	NA	NA	NA	tcga-bh-a202-f64226	32acc3f7-b74b-4080-8297-329edc6a00d5	canonical	NA	positive	NA	NA	NA	NA	positive	other	NA	NA	NA	NA	NA	NA	21	27	NA	NA	-22052	0	0	NA	NA	NA	NA
TCGA-BH-A203-01A	b3264748-947a-43aa-b227-b294fbcc8447	a203	dead	1174	1174	NA	NA	NA	78	NA	NA	NA	NA	right	NA	NA	NA	nationwide children's hospital	case matched methylation control	NA	case matched expression control	NA	NA	canonical - plus	NA	NA	NA	NA	NA	NA	NA	lumpectomy	NA	NA	NA	NA	NA	NA	21	8	NA	NA	-28609	0	0	NA	NA	NA	NA
TCGA-BH-A204-01A	05135396-df5c-49db-b34e-f4add5b65a2b	a204	dead	2534	2534	NA	NA	NA	80	NA	NA	NA	NA	left	NA	NA	NA	nationwide children's hospital	case matched methylation control	NA	case matched expression control	NA	NA	canonical - plus	NA	NA	NA	NA	NA	NA	NA	modified radical mastectomy	NA	NA	NA	NA	NA	NA	21	8	NA	NA	-29529	0	0	NA	NA	NA	NA
TCGA-BH-A208-01A	ddcbdac6-9e43-4146-a611-d033125eba14	a208	dead	1759	1759	NA	NA	NA	48	NA	NA	NA	NA	left	NA	NA	NA	nationwide children's hospital	case matched methylation control	NA	case matched expression control	NA	NA	canonical - plus	NA	NA	NA	NA	NA	NA	NA	lumpectomy	NA	NA	NA	NA	NA	NA	21	8	NA	NA	-17715	0	0	NA	NA	NA	NA
TCGA-BH-A209-01A	5258294f-ef5b-4091-9183-6bcc545d54b2	a209	dead	3959	3959	NA	NA	NA	77	NA	NA	NA	NA	left upper outer quadrant	NA	NA	NA	nationwide children's hospital	case matched methylation control	NA	case matched expression control	NA	NA	canonical - plus	NA	positive	NA	NA	NA	NA	positive	lumpectomy	NA	NA	NA	NA	NA	NA	21	8	NA	NA	-28403	0	0	NA	NA	NA	NA
TCGA-BH-A28O-01A	84b7ccf2-8ab3-4b21-96de-800d231bc072	a28o	alive	0	1120	NA	NA	NA	50	NA	NA	NA	NA	right lower outer quadrant	sentinel node biopsy alone	NA	NA	nationwide children's hospital	NA	NA	NA	tcga-bh-a28o-f64237	78078e02-494d-4954-ba84-31674011235a	canonical	NA	positive	NA	NA	NA	NA	positive	other	NA	NA	NA	NA	NA	no	21	27	NA	NA	-18501	0	0	NA	NA	no	NA
TCGA-BH-A28Q-01A	32861b48-83f5-43a3-bb54-45215ad2c5d6	a28q	alive	0	1119	NA	NA	NA	46	NA	NA	NA	NA	right	NA	NA	NA	nationwide children's hospital	NA	NA	NA	tcga-bh-a28q-f64272	5b9a0c32-1b0d-45aa-bd92-c67cd68d5dd6	canonical	NA	positive	NA	NA	NA	NA	positive	modified radical mastectomy	NA	NA	NA	NA	NA	NA	21	28	NA	NA	-16882	0	0	NA	NA	NA	NA
TCGA-BH-A2L8-01A	bac4b268-c781-4408-96d8-43a48fec7418	a2l8	alive	0	612	NA	NA	NA	45	NA	NA	NA	NA	right upper outer quadrant	sentinel node biopsy alone	NA	NA	nationwide children's hospital	NA	NA	NA	tcga-bh-a2l8-f39616	c86acd7b-afea-462d-bda8-0a6980460d1e	canonical	NA	positive	NA	NA	NA	NA	positive	other	NA	NA	NA	NA	NA	no	21	28	NA	NA	-16658	0	0	NA	NA	no	NA
TCGA-BH-A42T-01A	10c829ec-fd66-49c4-8afe-ad3ae567372c	a42t	dead	320	320	NA	NA	NA	75	NA	NA	NA	NA	left	sentinel node biopsy alone	NA	NA	nationwide children's hospital	NA	NA	NA	tcga-bh-a42t-f61922	94a68c9f-6ae9-4265-8fb9-c05bc75d0b91	canonical	NA	positive	NA	NA	NA	NA	positive	simple mastectomy	NA	NA	NA	NA	NA	NA	21	10	NA	NA	-27731	0	0	NA	NA	NA	NA
TCGA-BH-A42U-01A	2dc1cec9-925a-417f-9e21-3c2143e711b4	a42u	alive	0	3364	NA	NA	NA	80	NA	NA	NA	NA	right	NA	NA	NA	nationwide children's hospital	NA	NA	NA	tcga-bh-a42u-f61923	19515634-4b7a-46fc-8ffd-c9c2eb15c93a	canonical	NA	negative	NA	NA	NA	NA	negative	simple mastectomy	NA	NA	NA	NA	NA	NA	21	10	NA	NA	-29330	0	0	NA	NA	NA	NA
TCGA-BH-A42V-01A	57cf380d-ab52-467f-b9ae-740b2f84c820	a42v	alive	0	635	NA	NA	NA	41	NA	NA	NA	NA	left lower outer quadrant	sentinel node biopsy alone	NA	NA	nationwide children's hospital	NA	NA	NA	tcga-bh-a42v-f61941	2027c9e7-9c37-444b-a786-938efdd802e6	canonical	negative	positive	NA	NA	NA	other	positive	modified radical mastectomy	reexcision of segmental mastectomy	NA	NA	NA	NA	NA	21	10	NA	NA	-15158	0	0	NA	NA	NA	NA
TCGA-BH-A5IZ-01A	a8a33ba9-0976-4e19-b0e9-fa5ba4d4eaa8	a5iz	alive	0	567	NA	NA	NA	51	NA	NA	NA	NA	left	NA	NA	NA	nationwide children's hospital	NA	NA	germline comparison	tcga-bh-a5iz-f63663	faadba23-9d4f-4ac4-adb7-5e0f9cc3ff01	canonical - plus	NA	positive	NA	NA	NA	NA	negative	lumpectomy	NA	NA	NA	NA	NA	NA	21	14	NA	NA	-18927	0	0	NA	NA	NA	NA
TCGA-BH-A5J0-01A	db55d9d9-dd56-4ca9-b1f1-0d929697b280	a5j0	alive	0	715	NA	NA	NA	63	NA	NA	NA	NA	left	NA	NA	NA	nationwide children's hospital	NA	NA	NA	tcga-bh-a5j0-f63664	10b16acd-2e32-4414-99e9-3838d5692cfb	canonical	NA	positive	NA	NA	NA	NA	positive	simple mastectomy	NA	NA	NA	NA	NA	NA	21	14	NA	NA	-23072	0	0	NA	NA	NA	NA
TCGA-BH-A6R8-01A	91b09291-5944-4691-a0d8-7d1ccc649b9b	a6r8	alive	0	293	NA	NA	NA	46	NA	NA	NA	NA	left	NA	NA	NA	nationwide children's hospital	NA	NA	NA	tcga-bh-a6r8-f63677	df7231e8-9032-4f1e-88ae-b322de8edcfd	canonical	NA	positive	NA	NA	NA	NA	positive	lumpectomy	NA	NA	NA	NA	NA	NA	21	15	NA	NA	-16829	0	0	NA	NA	NA	NA
TCGA-BH-A6R9-01A	43cc074d-b85a-4b0b-8feb-833094ffc565	a6r9	alive	0	160	NA	NA	NA	61	NA	NA	NA	NA	left	NA	NA	NA	nationwide children's hospital	NA	NA	NA	tcga-bh-a6r9-f63678	d2af96b0-8735-4ae4-9821-e64b25949d6e	canonical	NA	negative	NA	NA	NA	NA	positive	modified radical mastectomy	NA	NA	NA	NA	NA	NA	21	15	NA	NA	-22325	0	0	NA	NA	NA	NA
TCGA-BH-A8FZ-01A	1cc30842-4a5b-4f07-b36f-5b84ceaa5662	a8fz	alive	0	574	NA	NA	NA	58	NA	NA	NA	NA	left	NA	NA	NA	nationwide children's hospital	NA	NA	NA	tcga-bh-a8fz-f63679	11e8283a-157a-43a1-8db4-8f21080d28c5	canonical	NA	positive	NA	NA	NA	NA	positive	simple mastectomy	NA	NA	NA	NA	NA	NA	21	27	NA	NA	-21343	0	0	NA	NA	NA	NA
TCGA-BH-A8G0-01A	59d60247-e549-4326-a672-50b05c13a291	a8g0	alive	0	662	NA	NA	NA	54	NA	NA	NA	NA	left	NA	NA	NA	nationwide children's hospital	NA	NA	NA	tcga-bh-a8g0-f64200	10da390e-2291-419b-8b1d-56cd9274e316	canonical	NA	positive	NA	NA	NA	NA	positive	simple mastectomy	NA	NA	NA	NA	NA	NA	21	27	NA	NA	-19975	0	0	NA	NA	NA	NA
TCGA-BH-AB28-01A	09d6e904-7184-4788-8a19-04f8c46cb13f	ab28	alive	0	287	NA	NA	NA	53	NA	NA	NA	NA	left	NA	NA	NA	nationwide children's hospital	NA	NA	germline comparison	tcga-bh-ab28-f64209	6cb9d593-9190-4c31-968a-c9d75bc2480d	canonical - plus	NA	positive	NA	NA	NA	NA	positive	modified radical mastectomy	NA	NA	NA	NA	NA	NA	21	25	NA	NA	-19570	0	0	NA	NA	NA	NA
TCGA-C8-A12K-01A	6b923e30-2ddc-407f-91b1-c202f1373fbb	a12k	alive	0	0	NA	NA	NA	80	NA	NA	NA	NA	right upper inner quadrant	other (specify)	pateys surgery	NA	nationwide children's hospital	NA	NA	NA	NA	NA	canonical	NA	NA	NA	NA	NA	NA	NA	other	NA	NA	NA	NA	NA	no	21	12	NA	NA	-29463	0	0	NA	NA	NA	NA
TCGA-C8-A12L-01A	441919eb-8c9f-478c-bda3-8de4f8295e8a	a12l	alive	0	363	NA	NA	NA	67	NA	NA	NA	NA	right	axillary lymph node dissection alone	NA	NA	nationwide children's hospital	NA	NA	NA	tcga-c8-a12l-f20258	9a790e77-b373-41e6-98dd-4520857bb46f	canonical	NA	negative	NA	NA	NA	NA	negative	other	NA	NA	NA	NA	NA	NA	21	9	NA	NA	-24710	0	0	NA	NA	NA	NA
TCGA-C8-A12M-01A	dd0f8e5a-383d-4f03-bb71-0e115d4e442c	a12m	alive	0	358	NA	NA	NA	70	NA	NA	NA	NA	left	axillary lymph node dissection alone	NA	NA	nationwide children's hospital	NA	NA	NA	tcga-c8-a12m-f19093	24695606-56f0-47db-9b5e-afbc4c80292d	canonical	NA	positive	NA	NA	NA	NA	negative	other	NA	NA	NA	NA	NA	NA	21	2	NA	NA	-25811	0	0	NA	NA	NA	NA
TCGA-C8-A12N-01A	b8a615f9-d19b-4b09-8ec8-0674e5c648cd	a12n	alive	0	358	NA	NA	NA	58	NA	NA	NA	NA	right	axillary lymph node dissection alone	NA	NA	nationwide children's hospital	NA	NA	NA	tcga-c8-a12n-f20264	96df27e9-d48d-4a01-8961-1cffc6b18408	canonical	NA	positive	NA	NA	NA	NA	positive	other	NA	NA	NA	NA	NA	NA	21	9	NA	NA	-21428	0	0	NA	NA	NA	NA
TCGA-C8-A12O-01A	83f26720-007c-42c9-a7de-7484bf8afa89	a12o	alive	0	385	NA	NA	NA	50	NA	NA	NA	NA	left	axillary lymph node dissection alone	NA	NA	nationwide children's hospital	NA	NA	NA	tcga-c8-a12o-f20261	0ff852b6-07ca-4e22-8b58-a6ec5d9bc503	canonical	NA	positive	NA	NA	NA	NA	positive	other	NA	NA	NA	NA	NA	NA	21	9	NA	NA	-18506	0	0	NA	NA	NA	NA
TCGA-C8-A12P-01A	abdc76db-f85e-4337-a57e-6d098789da03	a12p	alive	0	358	NA	NA	NA	55	NA	NA	NA	NA	left	NA	NA	NA	nationwide children's hospital	NA	NA	NA	tcga-c8-a12p-f20267	e314b6fe-d28b-4608-b290-cc684f3a2b1a	canonical	NA	negative	NA	NA	NA	NA	negative	other	NA	NA	NA	NA	NA	NA	21	9	NA	NA	-20332	0	0	NA	NA	NA	NA
TCGA-C8-A12Q-01A	a824b3bd-34d5-4cc1-a92f-f9d6ac0f1814	a12q	dead	385	385	NA	no	NA	78	NA	NA	NA	NA	left	axillary lymph node dissection alone	NA	NA	nationwide children's hospital	NA	NA	NA	tcga-c8-a12q-f20253	84d2bf2f-915f-41a5-8b6e-de88c2a7a96b	canonical	NA	negative	NA	NA	NA	NA	negative	other	NA	NA	NA	NA	NA	NA	21	9	NA	NA	-28733	0	0	NA	NA	NA	NA
TCGA-C8-A12T-01A	71229981-97c2-4ae1-a130-fe5de336b37d	a12t	alive	0	0	NA	NA	NA	43	NA	NA	NA	NA	left	axillary lymph node dissection alone	NA	NA	nationwide children's hospital	NA	NA	NA	NA	NA	canonical	NA	positive	NA	NA	NA	NA	positive	other	NA	NA	NA	NA	NA	no	21	11	NA	NA	NA	0	0	NA	NA	no	NA
TCGA-C8-A12U-01A	97b5f490-1cd9-4833-b903-5f4c6e45670d	a12u	alive	0	385	NA	NA	NA	46	NA	NA	NA	NA	right	axillary lymph node dissection alone	NA	NA	nationwide children's hospital	NA	NA	NA	tcga-c8-a12u-f20249	06835152-b8ac-4fe9-a8e6-873e5b07fd48	canonical	NA	positive	NA	NA	NA	NA	positive	other	NA	NA	NA	NA	NA	NA	21	9	NA	NA	-17045	0	0	NA	NA	no	NA
TCGA-C8-A12V-01A	7e1673f8-5758-4963-8804-d5e39f06205b	a12v	alive	0	385	NA	NA	NA	55	NA	NA	NA	NA	right	axillary lymph node dissection alone	NA	NA	nationwide children's hospital	NA	NA	NA	tcga-c8-a12v-f19095	12e9d7f7-a7a6-4e0f-b152-ce708d83ba6c	canonical	NA	negative	NA	NA	NA	NA	negative	other	NA	NA	NA	NA	NA	NA	21	2	NA	NA	-20346	0	0	NA	NA	no	NA
TCGA-C8-A12W-01A	6adca853-1b09-47ff-814c-47b732a76d96	a12w	alive	0	385	NA	NA	NA	49	NA	NA	NA	NA	left	axillary lymph node dissection alone	NA	NA	nationwide children's hospital	NA	NA	NA	tcga-c8-a12w-f20244	8d4153e6-1d54-4375-9ddb-e9811157ba3e	canonical	NA	positive	NA	NA	NA	NA	positive	other	NA	NA	NA	NA	NA	NA	21	9	NA	NA	-18140	0	0	NA	NA	NA	NA
TCGA-C8-A12X-01A	65cde5d5-1efc-4e30-b1bd-a93598794f2c	a12x	alive	0	385	NA	NA	NA	62	NA	NA	NA	NA	left	axillary lymph node dissection alone	NA	NA	nationwide children's hospital	NA	NA	NA	tcga-c8-a12x-f19102	72134208-f31f-470b-845a-66954265b46d	canonical	NA	positive	NA	NA	NA	NA	positive	other	NA	NA	NA	NA	NA	NA	21	2	NA	NA	-22889	0	0	NA	NA	no	NA
TCGA-C8-A12Y-01A	298a1710-deb4-4064-a0f2-da32d43aa217	a12y	alive	0	1476	NA	NA	NA	44	NA	NA	NA	NA	left	axillary lymph node dissection alone	NA	NA	nationwide children's hospital	NA	NA	NA	tcga-c8-a12y-f70839	beee8436-461c-4f8e-b7fc-6960b548af37	canonical	NA	NA	NA	NA	NA	NA	NA	other	NA	NA	NA	NA	NA	NA	21	9	NA	NA	NA	0	0	NA	NA	no	NA
TCGA-C8-A12Z-01A	42621dfa-abfd-4c7d-8bc5-a02a09d1c2b4	a12z	alive	0	382	NA	NA	NA	45	NA	NA	NA	NA	right	axillary lymph node dissection alone	NA	NA	nationwide children's hospital	NA	NA	NA	tcga-c8-a12z-f70810	cfb88891-da2a-4058-b2a7-44a8a2e2afde	canonical	negative	negative	NA	NA	NA	NA	negative	other	NA	NA	NA	NA	NA	NA	21	9	NA	NA	-16508	0	0	NA	NA	no	NA
TCGA-C8-A130-01A	8cf54607-01ce-42b0-9bd9-8627edd9f3b7	a130	alive	0	370	NA	NA	NA	52	NA	NA	NA	NA	left	axillary lymph node dissection alone	NA	NA	nationwide children's hospital	NA	NA	NA	tcga-c8-a130-f70814	aca661fa-1bc0-459d-89d8-025d8d39e976	canonical	NA	positive	NA	NA	NA	NA	positive	other	NA	NA	NA	NA	NA	NA	21	9	NA	NA	-19117	0	0	NA	NA	no	NA
TCGA-C8-A131-01A	c49e3b18-fd88-48f4-8b01-300692ceb367	a131	alive	0	411	NA	NA	NA	82	NA	NA	NA	NA	left	axillary lymph node dissection alone	NA	NA	nationwide children's hospital	NA	NA	NA	tcga-c8-a131-f70827	fd18de54-343a-43e7-9ea3-010208d98744	canonical	NA	negative	NA	NA	NA	NA	negative	other	NA	NA	NA	NA	NA	NA	21	9	NA	NA	-29966	0	0	NA	NA	no	NA
TCGA-C8-A132-01A	89e867de-d30e-4bfc-a453-0a76309dabd5	a132	alive	0	383	NA	NA	NA	56	NA	NA	NA	NA	left	axillary lymph node dissection alone	NA	NA	nationwide children's hospital	NA	NA	NA	tcga-c8-a132-f70826	9bdf73d9-8363-4f50-92ec-41537b282632	canonical	NA	positive	NA	NA	NA	NA	positive	other	NA	NA	NA	NA	NA	NA	21	9	NA	NA	-20471	0	0	NA	NA	no	NA
TCGA-C8-A133-01A	b8b6cebc-26dc-43ae-a94a-20da6018f7ae	a133	alive	0	0	NA	NA	NA	65	NA	NA	NA	NA	right	axillary lymph node dissection alone	NA	NA	nationwide children's hospital	NA	NA	NA	NA	NA	canonical	NA	positive	NA	NA	NA	NA	positive	modified radical mastectomy	NA	NA	NA	NA	NA	NA	21	15	NA	NA	-23922	0	0	NA	NA	NA	NA
TCGA-C8-A134-01A	f1692f4b-ce1b-4fc5-ac55-1022ecae0d1e	a134	alive	0	383	NA	NA	NA	52	NA	NA	NA	NA	left	axillary lymph node dissection alone	NA	NA	nationwide children's hospital	NA	NA	NA	tcga-c8-a134-f70822	13f00b89-54ab-41da-bbd2-02c3d6521ccb	canonical	NA	negative	NA	NA	NA	NA	negative	other	NA	NA	NA	NA	NA	NA	21	9	NA	NA	-19010	0	0	NA	NA	NA	NA
TCGA-C8-A135-01A	33cea538-4c3f-470a-972d-257c43241ab4	a135	alive	0	393	NA	NA	NA	64	NA	NA	NA	NA	left	axillary lymph node dissection alone	NA	NA	nationwide children's hospital	NA	NA	NA	tcga-c8-a135-f70817	2713e11e-2440-4519-9a50-b0e7f2c3b23e	canonical	NA	negative	NA	NA	NA	NA	negative	modified radical mastectomy	NA	NA	NA	NA	NA	NA	21	9	NA	NA	-23667	0	0	NA	NA	no	NA
TCGA-C8-A137-01A	03ab1e9f-4918-404d-b178-3a4fd929c5e8	a137	alive	0	379	NA	NA	NA	34	NA	NA	NA	NA	left	axillary lymph node dissection alone	NA	NA	nationwide children's hospital	NA	NA	NA	tcga-c8-a137-f70815	3319b260-e0f5-4aba-9676-da21e0bdf2cb	canonical	NA	negative	NA	NA	NA	NA	negative	modified radical mastectomy	NA	NA	NA	NA	NA	NA	21	9	NA	NA	-12729	0	0	NA	NA	no	NA
TCGA-C8-A138-01A	b6c286c6-2755-419b-87d3-59c7feda9653	a138	alive	0	380	NA	NA	NA	54	NA	NA	NA	NA	left	axillary lymph node dissection alone	NA	NA	nationwide children's hospital	NA	NA	NA	tcga-c8-a138-f71893	ca8159bd-20c6-4347-8d27-78773527103d	canonical	NA	positive	NA	NA	NA	NA	negative	modified radical mastectomy	NA	NA	NA	NA	NA	NA	21	31	NA	NA	-20053	0	0	NA	NA	no	NA
TCGA-C8-A1HE-01A	b26d41cd-393b-4cd4-8925-a9488f7de576	a1he	alive	0	375	NA	NA	NA	59	NA	NA	NA	NA	right	axillary lymph node dissection alone	NA	NA	nationwide children's hospital	NA	NA	NA	tcga-c8-a1he-f20269	16cb3317-31c3-4e95-9b3b-0ebe48fff665	canonical	NA	positive	NA	NA	NA	NA	positive	other	NA	NA	NA	NA	NA	no	21	9	NA	NA	NA	0	0	NA	NA	no	NA
TCGA-C8-A1HF-01A	a2453bcb-90f2-4505-949d-a89cf4bfc9b8	a1hf	alive	0	332	NA	NA	NA	48	NA	NA	NA	NA	left	axillary lymph node dissection alone	NA	NA	nationwide children's hospital	NA	NA	NA	tcga-c8-a1hf-f19092	437a6d3e-663b-42b1-840d-510bf0ca88b9	canonical	NA	negative	NA	NA	NA	NA	positive	other	NA	NA	NA	NA	NA	no	21	2	NA	NA	NA	0	0	NA	NA	no	NA
TCGA-C8-A1HG-01A	0c23c380-363c-474d-b64c-b47f612a8225	a1hg	alive	0	345	NA	NA	NA	50	NA	NA	NA	NA	right	axillary lymph node dissection alone	NA	NA	nationwide children's hospital	NA	NA	NA	tcga-c8-a1hg-f19096	e5b2d364-8b39-452f-9930-e30da170b55f	canonical	NA	positive	NA	NA	NA	NA	positive	other	NA	NA	NA	NA	NA	no	21	2	NA	NA	NA	0	0	NA	NA	no	NA
TCGA-C8-A1HI-01A	444374f8-9282-439c-af00-0f828edcbff3	a1hi	alive	0	343	NA	NA	NA	40	NA	NA	NA	NA	right	axillary lymph node dissection alone	NA	NA	nationwide children's hospital	NA	NA	NA	tcga-c8-a1hi-f19099	41b909ba-c457-4643-9821-7881f6ea6087	canonical	NA	positive	NA	NA	NA	NA	positive	other	NA	NA	NA	NA	NA	NA	21	2	NA	NA	NA	0	0	NA	NA	no	NA
TCGA-C8-A1HJ-01A	a855c228-a263-44df-87a0-cbc32187e3f5	a1hj	alive	0	5	NA	NA	NA	53	NA	NA	NA	NA	right	axillary lymph node dissection alone	NA	NA	nationwide children's hospital	NA	NA	NA	NA	NA	canonical	NA	negative	NA	NA	NA	NA	negative	other	NA	NA	NA	NA	NA	NA	21	1	NA	NA	-19629	0	0	NA	NA	no	NA
TCGA-C8-A1HK-01A	52c35691-efca-42f5-a03e-02c9f872275c	a1hk	alive	0	366	NA	NA	NA	53	NA	NA	NA	NA	right	axillary lymph node dissection alone	NA	NA	nationwide children's hospital	NA	NA	NA	tcga-c8-a1hk-f19100	a1ca0508-80be-4ca1-a509-e54f50deb1a9	canonical	NA	negative	NA	NA	NA	NA	negative	other	NA	NA	NA	NA	NA	NA	21	2	NA	NA	NA	0	0	NA	NA	no	NA
TCGA-C8-A1HM-01A	8b525ec6-d24b-49d4-bfcb-b354de4dae7c	a1hm	alive	0	375	NA	NA	NA	74	NA	NA	NA	NA	left	axillary lymph node dissection alone	NA	NA	nationwide children's hospital	NA	NA	NA	tcga-c8-a1hm-f70806	6f012bb5-7730-453f-96b2-c41eef03f8bc	canonical	NA	positive	NA	NA	NA	NA	positive	modified radical mastectomy	NA	NA	NA	NA	NA	NA	21	9	NA	NA	-27063	0	0	NA	NA	no	NA
TCGA-C8-A1HN-01A	86a18ae0-dfb1-49c3-b5c4-67ec331d6e40	a1hn	alive	0	394	NA	NA	NA	56	NA	NA	NA	NA	left	axillary lymph node dissection alone	NA	NA	nationwide children's hospital	NA	NA	NA	tcga-c8-a1hn-f71885	60e148cb-fb45-4819-918f-bd620d94710e	canonical	NA	positive	NA	NA	NA	NA	positive	modified radical mastectomy	NA	NA	NA	NA	NA	NA	21	31	NA	NA	-20712	0	0	NA	NA	no	NA
TCGA-C8-A1HO-01A	b3354b72-2637-4edc-9a95-e55801d3ac13	a1ho	alive	0	375	NA	NA	NA	34	NA	NA	NA	NA	left upper inner quadrant	NA	NA	NA	nationwide children's hospital	NA	NA	NA	tcga-c8-a1ho-f70802	d4532637-af57-4952-9398-e0de374dd889	canonical	NA	positive	NA	NA	NA	NA	positive	NA	NA	NA	NA	NA	NA	NA	21	9	NA	NA	-12715	0	0	NA	NA	NA	NA
TCGA-C8-A26V-01A	89414e79-7f89-42d9-8228-101b5bf2f31f	a26v	alive	0	616	NA	NA	NA	47	NA	NA	NA	NA	right	NA	NA	NA	nationwide children's hospital	NA	NA	NA	tcga-c8-a26v-f70799	505acefd-f363-4529-b80d-839879624df1	canonical	NA	positive	NA	NA	NA	NA	positive	modified radical mastectomy	NA	NA	NA	NA	NA	NA	21	9	NA	NA	-17468	0	0	NA	NA	NA	NA
TCGA-C8-A26W-01A	ff0f875f-113a-4c0f-8c0a-4259cd496e6d	a26w	alive	0	381	NA	NA	NA	58	NA	NA	NA	NA	left upper outer quadrant	NA	NA	NA	nationwide children's hospital	NA	NA	NA	tcga-c8-a26w-f70796	0471d048-fe29-4b0c-ac3b-79c58867b410	canonical	NA	positive	NA	NA	NA	NA	positive	modified radical mastectomy	NA	NA	NA	NA	NA	NA	21	9	NA	NA	-21391	0	0	NA	NA	NA	NA
TCGA-C8-A26X-01A	70ab4f23-23c4-409f-a5cc-18a010c3a24e	a26x	alive	0	376	NA	NA	NA	58	NA	NA	NA	NA	right upper outer quadrant	NA	NA	NA	nationwide children's hospital	NA	NA	NA	tcga-c8-a26x-f70792	521990dd-93ce-4a11-abed-112046f3a659	canonical	NA	negative	NA	NA	NA	NA	negative	modified radical mastectomy	NA	NA	NA	NA	NA	NA	21	9	NA	NA	-21463	0	0	NA	NA	NA	NA
TCGA-C8-A26Y-01A	4d51159f-ab2f-40e3-a363-847c3654431e	a26y	alive	0	394	NA	NA	NA	90	NA	NA	NA	NA	left upper outer quadrant	NA	NA	NA	nationwide children's hospital	NA	NA	NA	tcga-c8-a26y-f70791	d698e40f-5055-4df2-962d-c3be9150cbe3	canonical	NA	negative	NA	NA	NA	NA	negative	modified radical mastectomy	NA	NA	NA	NA	NA	NA	21	9	NA	NA	-32872	0	0	NA	NA	NA	NA
TCGA-C8-A26Z-01A	dc11b1c7-1f00-4813-b4b5-ecf776b2eb37	a26z	alive	0	470	NA	NA	NA	59	NA	NA	NA	NA	right upper inner quadrant	NA	NA	NA	nationwide children's hospital	NA	NA	NA	tcga-c8-a26z-f70835	ea721df8-5ad0-46f3-a433-3cef5c43af19	canonical	NA	positive	NA	NA	NA	NA	positive	other	NA	NA	NA	NA	NA	NA	21	9	NA	NA	NA	0	0	NA	NA	no	NA
TCGA-C8-A273-01A	5a5f0f48-2b13-4e78-b130-901b85d9a7f3	a273	alive	0	513	NA	NA	NA	29	NA	NA	NA	NA	right upper inner quadrant	axillary lymph node dissection alone	NA	NA	nationwide children's hospital	NA	NA	NA	tcga-c8-a273-f70833	e0ea316b-ab47-4a36-8c89-6941291c208b	canonical	NA	positive	NA	NA	NA	NA	positive	other	NA	NA	NA	NA	NA	NA	21	9	NA	NA	NA	0	0	NA	NA	NA	NA
TCGA-C8-A274-01A	dbcad60f-86c7-41e3-b0ae-baa39c9f83dd	a274	alive	0	508	NA	NA	NA	63	NA	NA	NA	NA	right	NA	NA	NA	nationwide children's hospital	NA	NA	NA	tcga-c8-a274-f70831	52dc036e-216b-4745-acb0-5ea2953bcf96	canonical	NA	positive	NA	NA	NA	NA	positive	other	NA	NA	NA	NA	NA	NA	21	9	NA	NA	-23337	0	0	NA	NA	NA	NA
TCGA-C8-A275-01A	ce887e90-0660-4f44-a3a4-b3b894cb7eda	a275	alive	0	1	NA	NA	NA	56	NA	NA	NA	NA	left upper outer quadrant	NA	NA	NA	nationwide children's hospital	NA	NA	NA	NA	NA	canonical	NA	NA	NA	NA	NA	NA	NA	other	NA	NA	NA	NA	NA	NA	21	21	NA	NA	-20774	0	0	NA	NA	NA	NA
TCGA-C8-A278-01A	65077db7-dd59-4362-9d28-d5a9154e9be0	a278	alive	0	297	NA	NA	NA	61	NA	NA	NA	NA	left	NA	NA	NA	nationwide children's hospital	NA	NA	NA	tcga-c8-a278-f20278	c06e117f-44a5-4cd4-8b4b-0149099dece2	canonical	NA	negative	NA	NA	NA	NA	negative	other	NA	NA	NA	NA	NA	NA	21	9	NA	NA	-22598	0	0	NA	NA	NA	NA
TCGA-C8-A27A-01A	3b1f7e48-216d-47de-ba79-db350f52bff0	a27a	alive	0	747	NA	NA	NA	48	NA	NA	NA	NA	right upper outer quadrant	NA	NA	NA	nationwide children's hospital	NA	NA	NA	tcga-c8-a27a-f70786	ed1a7238-3d18-4031-891c-4db84e6dcb36	canonical	NA	positive	NA	NA	NA	NA	positive	modified radical mastectomy	NA	NA	NA	NA	NA	NA	21	9	NA	NA	-17779	0	0	NA	NA	NA	NA
TCGA-C8-A27B-01A	f0d8a1fe-e313-44f1-99cc-b965cbeeff0e	a27b	alive	0	439	NA	NA	NA	48	NA	NA	NA	NA	left	NA	NA	NA	nationwide children's hospital	NA	NA	NA	tcga-c8-a27b-f70781	034e528f-aa4b-4323-b33b-521853e5e8e5	canonical	NA	negative	NA	NA	NA	NA	negative	modified radical mastectomy	NA	NA	NA	NA	NA	NA	21	9	NA	NA	-17763	0	0	NA	NA	NA	NA
TCGA-C8-A3M7-01A	959ff069-8a49-4c9b-85c2-5291cac0acff	a3m7	dead	1034	1034	NA	NA	NA	60	NA	NA	NA	NA	left upper inner quadrant	axillary lymph node dissection alone	NA	NA	nationwide children's hospital	NA	NA	NA	tcga-c8-a3m7-f70838	bfe6a7ff-9238-485c-836e-9be96855ef6d	canonical	NA	negative	NA	NA	NA	NA	negative	modified radical mastectomy	NA	NA	NA	NA	NA	no	21	9	NA	NA	-22096	0	0	NA	NA	no	NA
TCGA-C8-A3M8-01A	c1e704d6-a33b-4891-90bd-992b0040c075	a3m8	alive	0	394	NA	NA	NA	68	NA	NA	NA	NA	right upper outer quadrant	axillary lymph node dissection alone	NA	NA	nationwide children's hospital	NA	NA	NA	tcga-c8-a3m8-f70779	36ba9aa0-fb67-44c6-8e4e-e8bdb8c92db5	canonical	NA	positive	NA	NA	NA	NA	positive	modified radical mastectomy	NA	NA	NA	NA	NA	no	21	9	NA	NA	-24877	0	0	NA	NA	no	NA
TCGA-C8-A8HP-01A	8db69f1d-72e2-40ba-ad8a-cf228499840d	a8hp	alive	0	396	NA	NA	NA	59	NA	NA	NA	NA	left upper outer quadrant	axillary lymph node dissection alone	NA	NA	nationwide children's hospital	NA	NA	NA	tcga-c8-a8hp-f69610	91ff3abd-e5cd-49e0-bde9-3d9971e451a6	canonical	NA	negative	NA	NA	NA	NA	negative	modified radical mastectomy	NA	NA	NA	NA	NA	NA	21	15	NA	NA	-21613	0	0	NA	NA	NA	NA
TCGA-C8-A8HQ-01A	6951fe6a-d7d1-4f41-85af-76655b5d1f62	a8hq	alive	0	380	NA	NA	NA	53	NA	NA	NA	NA	left	axillary lymph node dissection alone	NA	NA	nationwide children's hospital	NA	NA	NA	tcga-c8-a8hq-f69879	4243ce27-cd57-4d7a-b76b-03869d2a4945	canonical	NA	positive	NA	NA	NA	NA	positive	modified radical mastectomy	NA	NA	NA	NA	NA	no	21	22	NA	NA	-19432	0	0	NA	NA	NA	NA
TCGA-C8-A8HR-01A	dcb68327-1537-4ca6-81de-3910d0663cb8	a8hr	alive	0	408	NA	NA	NA	49	NA	NA	NA	NA	right	axillary lymph node dissection alone	NA	NA	nationwide children's hospital	NA	NA	NA	tcga-c8-a8hr-f69796	33528c47-968b-492e-b86c-31dc1d52f0ed	canonical	NA	NA	NA	NA	NA	NA	NA	modified radical mastectomy	NA	NA	NA	NA	NA	no	21	20	NA	NA	-17921	0	0	NA	NA	NA	NA
TCGA-C8-A9FZ-01A	726c6892-0dce-4869-a7a7-cc44c26fe843	a9fz	alive	0	592	NA	NA	NA	49	NA	NA	NA	NA	left	axillary lymph node dissection alone	NA	NA	nationwide children's hospital	NA	NA	NA	tcga-c8-a9fz-f69966	48655eeb-7e9f-4726-9820-88fff609a953	canonical	NA	NA	NA	NA	NA	NA	NA	modified radical mastectomy	NA	NA	NA	NA	NA	no	21	23	NA	NA	-18038	0	0	NA	NA	NA	NA
TCGA-D8-A13Y-01A	17f275c1-a0d4-487d-8f02-ea279584b4cd	a13y	alive	0	1728	NA	NA	NA	52	NA	NA	NA	NA	right upper outer quadrant	axillary lymph node dissection alone	NA	NA	nationwide children's hospital	NA	NA	NA	tcga-d8-a13y-f72210	f83fc2bb-608a-4335-94f9-3607fe7d1296	canonical	NA	positive	NA	NA	NA	NA	positive	modified radical mastectomy	NA	NA	NA	NA	NA	no	21	29	NA	NA	-19028	0	0	NA	NA	NA	NA
TCGA-D8-A13Z-01A	5a17dcd9-5ced-4a69-8069-23c7fd0649d1	a13z	alive	0	635	NA	NA	NA	51	NA	NA	NA	NA	right lower outer quadrant	axillary lymph node dissection alone	NA	NA	nationwide children's hospital	NA	NA	NA	tcga-d8-a13z-f20731	444554b2-937f-4327-a7cc-e6a2b5bdc2b7	canonical	NA	negative	NA	NA	NA	NA	negative	modified radical mastectomy	NA	NA	NA	NA	NA	NA	21	14	NA	NA	-18942	0	0	NA	NA	NA	NA
TCGA-D8-A140-01A	2585edbd-3488-4100-a4ab-a161252a31ee	a140	alive	0	403	NA	NA	NA	62	left	NA	NA	NA	left upper outer quadrant	axillary lymph node dissection alone	NA	NA	nationwide children's hospital	NA	NA	NA	tcga-d8-a140-f13808	39f74cef-2c48-4800-b82a-92dcba81257c	canonical	NA	positive	NA	NA	NA	NA	positive	modified radical mastectomy	NA	NA	NA	NA	NA	no	21	20	NA	NA	-22900	0	0	NA	NA	NA	NA
TCGA-D8-A141-01A	42f6f503-4cf6-4a8e-b5fe-b44bccf6b38b	a141	alive	0	626	NA	NA	NA	40	NA	NA	NA	NA	right	axillary lymph node dissection alone	NA	NA	nationwide children's hospital	NA	NA	NA	tcga-d8-a141-f20734	3a9c552d-4eb1-455f-a421-e364643e5041	canonical	NA	positive	NA	NA	NA	NA	positive	modified radical mastectomy	NA	NA	NA	NA	NA	NA	21	14	NA	NA	-14626	0	0	NA	NA	NA	NA
TCGA-D8-A142-01A	ccb22ecc-6e18-44b8-ad48-6ab51314b16e	a142	alive	0	425	NA	NA	NA	74	left	NA	NA	NA	left lower outer quadrant	axillary lymph node dissection alone	NA	NA	nationwide children's hospital	NA	NA	NA	tcga-d8-a142-f13813	955192a4-d534-42d7-8a51-67d7446f1ae1	canonical	NA	negative	NA	NA	NA	NA	negative	modified radical mastectomy	NA	NA	NA	NA	NA	no	21	20	NA	NA	-27313	0	0	NA	NA	NA	NA
TCGA-D8-A143-01A	1c40b84e-a0e3-429f-a48c-21566cf881c0	a143	alive	0	431	NA	NA	NA	51	NA	NA	NA	NA	left lower inner quadrant	axillary lymph node dissection alone	NA	NA	nationwide children's hospital	NA	NA	NA	tcga-d8-a143-f13817	a3f360db-0bef-4cc5-8175-d859a234af9e	canonical	NA	negative	NA	NA	NA	NA	negative	modified radical mastectomy	NA	NA	NA	NA	NA	no	21	4	NA	NA	-18984	0	0	NA	NA	NA	NA
TCGA-D8-A145-01A	4958c36f-1dc7-4f14-9dec-36e14107dbe3	a145	alive	0	410	NA	NA	NA	80	right	NA	NA	NA	right upper inner quadrant	sentinel lymph node biopsy plus axillary dissection	NA	NA	nationwide children's hospital	NA	NA	NA	tcga-d8-a145-f13811	b69a91ee-1ba2-4163-a64d-36753abd9880	canonical	NA	positive	NA	NA	NA	NA	positive	simple mastectomy	NA	NA	NA	NA	NA	no	21	4	NA	NA	-29280	0	0	NA	NA	NA	NA
TCGA-D8-A147-01A	fc18d029-9be2-4fa0-9aef-6d647dc55f0b	a147	alive	0	584	NA	NA	NA	45	NA	NA	NA	NA	right lower outer quadrant	sentinel node biopsy alone	NA	NA	nationwide children's hospital	NA	NA	NA	tcga-d8-a147-f20737	6b778912-ac2e-4c50-a3f5-4d28049be764	canonical	NA	negative	NA	NA	NA	NA	negative	lumpectomy	NA	NA	NA	NA	NA	NA	21	14	NA	NA	-16736	0	0	NA	NA	NA	NA
TCGA-D8-A1J8-01A	62d70067-ff77-4f95-8b69-f537abaf74ce	a1j8	alive	0	431	NA	NA	NA	77	NA	NA	NA	NA	right upper outer quadrant	axillary lymph node dissection alone	NA	NA	nationwide children's hospital	NA	NA	NA	tcga-d8-a1j8-f14040	ee01e96e-58a8-4b56-ae04-e66483766188	canonical	NA	positive	NA	NA	NA	NA	positive	modified radical mastectomy	NA	NA	NA	NA	NA	NA	21	18	NA	NA	-28444	0	0	NA	NA	NA	NA
TCGA-D8-A1J9-01A	d5e9a403-88ce-40fc-bb85-80cf3f8ff6bc	a1j9	alive	0	532	NA	NA	NA	48	NA	NA	NA	NA	left upper outer quadrant	axillary lymph node dissection alone	NA	NA	nationwide children's hospital	NA	NA	NA	tcga-d8-a1j9-f20944	9648dfd3-bff5-4cc5-be38-c1d57fefe0d7	canonical	NA	positive	NA	NA	NA	NA	negative	modified radical mastectomy	NA	NA	NA	NA	NA	NA	21	19	NA	NA	-17879	0	0	NA	NA	NA	NA
TCGA-D8-A1JA-01A	9ced0c70-c46c-4f98-8f48-840defe4b8b1	a1ja	alive	0	502	NA	no	NA	60	NA	NA	NA	NA	left upper outer quadrant	no axillary staging	NA	NA	nationwide children's hospital	NA	NA	NA	tcga-d8-a1ja-f20941	2c26170e-b4e3-428e-a2f1-d91b478e0568	canonical	NA	negative	NA	NA	NA	NA	negative	modified radical mastectomy	NA	NA	NA	NA	NA	no	21	19	NA	NA	-21918	0	0	NA	NA	NA	NA
TCGA-D8-A1JB-01A	dd96a9c7-899c-47cd-a0f9-b149ed07a5d6	a1jb	alive	0	1688	NA	NA	NA	54	NA	NA	NA	NA	right upper outer quadrant	axillary lymph node dissection alone	NA	NA	nationwide children's hospital	NA	NA	NA	tcga-d8-a1jb-f72209	8a90816f-786c-42bc-a9d7-81292956ce90	canonical	NA	positive	NA	NA	NA	NA	positive	modified radical mastectomy	NA	NA	NA	NA	NA	no	21	29	NA	NA	-19822	0	0	NA	NA	NA	NA
TCGA-D8-A1JC-01A	02e6f999-24f2-4ad2-9b92-df3ee2b082e5	a1jc	alive	0	480	NA	NA	NA	59	NA	NA	NA	NA	left upper outer quadrant	axillary lymph node dissection alone	NA	NA	nationwide children's hospital	NA	NA	NA	tcga-d8-a1jc-f20847	6e9db5ef-a97b-4101-b6fb-344c19f675d5	canonical	NA	positive	NA	NA	NA	NA	positive	modified radical mastectomy	NA	NA	NA	NA	NA	no	21	19	NA	NA	-21898	0	0	NA	NA	NA	NA
TCGA-D8-A1JD-01A	530ad151-703d-4638-851f-0b5111ff318b	a1jd	alive	0	552	NA	NA	NA	41	NA	NA	NA	NA	left upper outer quadrant	axillary lymph node dissection alone	NA	NA	nationwide children's hospital	NA	NA	NA	tcga-d8-a1jd-f20844	d3efee22-d62c-42f4-b23c-e08897b69a53	canonical	NA	positive	NA	NA	NA	NA	positive	modified radical mastectomy	NA	NA	NA	NA	NA	NA	21	19	NA	NA	-15166	0	0	NA	NA	NA	NA
TCGA-D8-A1JE-01A	115bc72c-116f-40c1-be9b-e3dd7650efae	a1je	alive	0	575	NA	NA	NA	62	NA	NA	NA	NA	left upper outer quadrant	axillary lymph node dissection alone	NA	NA	nationwide children's hospital	NA	NA	NA	tcga-d8-a1je-f20759	5a7761ff-5f3f-43f6-93d6-de3358891478	canonical	NA	positive	NA	NA	NA	NA	positive	modified radical mastectomy	NA	NA	NA	NA	NA	no	21	8	NA	NA	-22683	0	0	NA	NA	NA	NA
TCGA-D8-A1JF-01A	dcd5e079-813a-4c1a-b320-0931468d2bbc	a1jf	alive	0	366	NA	NA	NA	79	NA	NA	NA	NA	left upper outer quadrant	axillary lymph node dissection alone	NA	NA	nationwide children's hospital	NA	NA	NA	tcga-d8-a1jf-f14058	b68084f0-7e58-4822-841c-eef1c187a504	canonical	NA	negative	NA	NA	NA	NA	negative	modified radical mastectomy	NA	NA	NA	NA	NA	no	21	18	NA	NA	-29199	0	0	NA	NA	NA	NA
TCGA-D8-A1JG-01A	7f2a63e6-64d5-4be1-9814-e8416fc9e688	a1jg	alive	0	1612	NA	NA	NA	62	NA	NA	NA	NA	right upper outer quadrant	sentinel node biopsy alone	NA	NA	nationwide children's hospital	NA	NA	NA	tcga-d8-a1jg-f72208	43a0e4b3-430e-4554-9982-a15a1c5df509	canonical	NA	negative	NA	NA	NA	NA	negative	lumpectomy	NA	NA	NA	NA	NA	no	21	29	NA	NA	-22878	0	0	NA	NA	NA	NA
TCGA-D8-A1JH-01A	4d1bf9e6-5837-4aed-b568-92f014ed5a4b	a1jh	alive	0	426	NA	NA	NA	56	NA	NA	NA	NA	right lower outer quadrant	axillary lymph node dissection alone	NA	NA	nationwide children's hospital	NA	NA	NA	tcga-d8-a1jh-f14055	27d2c49e-febc-47d6-8410-8912f0ce7977	canonical	NA	positive	NA	NA	NA	NA	positive	modified radical mastectomy	NA	NA	NA	NA	NA	NA	21	18	NA	NA	-20497	0	0	NA	NA	NA	NA
TCGA-D8-A1JI-01A	baf2afc8-f16c-488f-947c-efc9083c6bef	a1ji	alive	0	577	NA	NA	NA	54	NA	NA	NA	NA	right upper outer quadrant	axillary lymph node dissection alone	NA	NA	nationwide children's hospital	NA	NA	NA	tcga-d8-a1ji-f20757	64833fd0-e1b5-4773-8638-1e41d0b9b4f0	canonical	NA	positive	NA	NA	NA	NA	positive	modified radical mastectomy	NA	NA	NA	NA	NA	no	21	19	NA	NA	-20072	0	0	NA	NA	NA	NA
TCGA-D8-A1JJ-01A	f7ab565c-83b5-4988-b9be-8a46f65dca8c	a1jj	alive	0	611	NA	NA	NA	54	NA	NA	NA	NA	right upper inner quadrant	sentinel node biopsy alone	NA	NA	nationwide children's hospital	NA	NA	NA	tcga-d8-a1jj-f20754	2586900a-76a7-44d0-9d02-828df5f321cd	canonical	NA	positive	NA	NA	NA	NA	positive	other	NA	NA	NA	NA	NA	NA	21	19	NA	NA	-19966	0	0	NA	NA	NA	NA
TCGA-D8-A1JK-01A	56203436-8634-4fd0-96b5-ba6be9d87857	a1jk	alive	0	612	NA	NA	NA	90	left upper outer quadrant	NA	NA	NA	left upper inner quadrant	axillary lymph node dissection alone	NA	NA	nationwide children's hospital	NA	NA	NA	tcga-d8-a1jk-f20751	e9360a7b-562c-479b-8705-03d745ca6930	canonical	NA	negative	NA	NA	NA	NA	positive	modified radical mastectomy	NA	NA	NA	NA	NA	NA	21	19	NA	NA	-32872	0	0	NA	NA	NA	NA
TCGA-D8-A1JL-01A	aa4244a8-0454-4247-a1c3-357fd51746fa	a1jl	alive	0	611	NA	NA	NA	72	NA	NA	NA	NA	left lower inner quadrant	axillary lymph node dissection alone	NA	NA	nationwide children's hospital	NA	NA	NA	tcga-d8-a1jl-f20747	dca53598-a604-4c2e-bc24-67a6ad8b8d49	canonical	NA	negative	NA	NA	NA	NA	negative	modified radical mastectomy	NA	NA	NA	NA	NA	NA	21	15	NA	NA	-26484	0	0	NA	NA	NA	NA
TCGA-D8-A1JM-01A	3e775c99-ceda-4246-8d6f-0f58ca5097c8	a1jm	alive	0	590	NA	NA	NA	59	NA	NA	NA	NA	right upper outer quadrant	axillary lymph node dissection alone	NA	NA	nationwide children's hospital	NA	NA	NA	tcga-d8-a1jm-f20742	f44ea1fb-71b0-4586-9da1-f4c78a24f0e4	canonical	NA	positive	NA	NA	NA	NA	negative	modified radical mastectomy	NA	NA	NA	NA	NA	NA	21	15	NA	NA	-21602	0	0	NA	NA	NA	NA
TCGA-D8-A1JN-01A	28911b97-42bf-4189-9961-522fc0aeebc6	a1jn	alive	0	620	NA	NA	NA	80	NA	NA	NA	NA	left	axillary lymph node dissection alone	NA	NA	nationwide children's hospital	NA	NA	NA	tcga-d8-a1jn-f20745	8392d4c7-1892-4b0d-873c-049a73a24ff4	canonical	NA	positive	NA	NA	NA	NA	positive	modified radical mastectomy	NA	NA	NA	NA	NA	NA	21	15	NA	NA	-29331	0	0	NA	NA	NA	NA
TCGA-D8-A1JP-01A	752f4773-5a12-4485-a1f6-896e148ddf4d	a1jp	alive	0	639	NA	NA	NA	73	NA	NA	NA	NA	left upper inner quadrant	sentinel node biopsy alone	NA	NA	nationwide children's hospital	NA	NA	NA	tcga-d8-a1jp-f20740	f5a697e5-7254-4e78-99d2-2c0d8f8c5549	canonical	negative	positive	NA	NA	NA	mastectomy nos	positive	lumpectomy	NA	NA	NA	NA	NA	NA	21	15	NA	NA	-26862	0	0	NA	NA	NA	NA
TCGA-D8-A1JS-01A	0d03055c-186b-418a-b614-e2035757bc3b	a1js	alive	0	371	NA	NA	NA	77	NA	NA	NA	NA	right upper outer quadrant	axillary lymph node dissection alone	NA	NA	nationwide children's hospital	NA	NA	NA	tcga-d8-a1js-f14051	07528aae-783f-405c-92d4-ae19620d76cb	canonical	NA	positive	NA	NA	NA	NA	positive	lumpectomy	NA	NA	NA	NA	NA	no	21	18	NA	NA	-28178	0	0	NA	NA	NA	NA
TCGA-D8-A1JT-01A	cd781589-3820-45a2-906b-8d60cd02f3ef	a1jt	alive	0	405	NA	NA	NA	70	NA	NA	NA	NA	left lower outer quadrant	axillary lymph node dissection alone	NA	NA	nationwide children's hospital	NA	NA	NA	tcga-d8-a1jt-f14048	61dfe752-c583-4674-9552-f736f4d0d0e5	canonical	NA	positive	NA	NA	NA	NA	positive	modified radical mastectomy	NA	NA	NA	NA	NA	no	21	18	NA	NA	-25677	0	0	NA	NA	NA	NA
TCGA-D8-A1JU-01A	af2a8e2f-2ae1-48bc-bba5-0e2c077c4e48	a1ju	alive	0	447	NA	NA	NA	51	NA	NA	NA	NA	left upper outer quadrant	sentinel node biopsy alone	NA	NA	nationwide children's hospital	NA	NA	NA	tcga-d8-a1ju-f14045	b6d244ec-4151-4ff5-bdcf-0c2e6d22101a	canonical	NA	positive	NA	NA	NA	NA	positive	simple mastectomy	NA	NA	NA	NA	NA	NA	21	18	NA	NA	-18733	0	0	NA	NA	NA	NA
TCGA-D8-A1X5-01A	eb93df3d-9e25-4e4c-9a5d-350f296e5acf	a1x5	alive	0	565	NA	NA	NA	81	right lower inner quadrant	right lower outer quadrant	NA	NA	right upper outer quadrant	axillary lymph node dissection alone	NA	NA	nationwide children's hospital	NA	NA	NA	tcga-d8-a1x5-f29934	eb83dace-75ee-47c9-a706-ed4628ebac90	canonical	NA	positive	NA	NA	NA	NA	positive	modified radical mastectomy	NA	NA	NA	NA	NA	NA	21	30	NA	NA	-29734	0	0	NA	NA	no	NA
TCGA-D8-A1X6-01A	42e47f3a-dff7-41e4-8f84-146d97e8ab72	a1x6	alive	0	541	NA	NA	NA	80	left upper outer quadrant	NA	NA	NA	left upper inner quadrant	axillary lymph node dissection alone	NA	NA	nationwide children's hospital	NA	NA	NA	tcga-d8-a1x6-f29980	98f6bfff-5de5-4ebe-a1e8-b4c971c5155c	canonical	NA	positive	NA	NA	NA	NA	positive	modified radical mastectomy	NA	NA	NA	NA	NA	NA	21	31	NA	NA	-29256	0	0	NA	NA	no	NA
TCGA-D8-A1X7-01A	cdab777e-62de-4d51-92af-b6eb089c111f	a1x7	alive	0	509	NA	NA	NA	40	NA	NA	NA	NA	right upper outer quadrant	axillary lymph node dissection alone	NA	NA	nationwide children's hospital	NA	NA	NA	tcga-d8-a1x7-f29985	dbb236ca-aac6-48bd-b702-95ba93ebe283	canonical	NA	positive	NA	NA	NA	NA	positive	simple mastectomy	NA	NA	NA	NA	NA	NA	21	31	NA	NA	-14858	0	0	NA	NA	no	NA
TCGA-D8-A1X8-01A	8624354c-af25-423c-9c71-48a5dd821097	a1x8	alive	0	783	NA	NA	NA	62	NA	NA	NA	NA	left lower outer quadrant	axillary lymph node dissection alone	NA	NA	nationwide children's hospital	NA	NA	NA	tcga-d8-a1x8-f29428	516f8a4d-f178-4835-bf60-28271ef03221	canonical	NA	positive	NA	2+	4 point scale	NA	indeterminate	modified radical mastectomy	NA	NA	NA	NA	NA	no	21	19	NA	NA	-22995	0	0	NA	NA	no	NA
TCGA-D8-A1X9-01A	34a74805-300c-4773-ab59-2085fcc2e6cc	a1x9	alive	0	727	NA	NA	NA	66	NA	NA	NA	NA	left lower outer quadrant	axillary lymph node dissection alone	NA	NA	nationwide children's hospital	NA	NA	NA	tcga-d8-a1x9-f29431	7dfb15f7-f9d2-4987-8254-9c11c8ead28e	canonical	NA	positive	NA	NA	NA	NA	positive	modified radical mastectomy	NA	NA	NA	NA	NA	no	21	19	NA	NA	-24417	0	0	NA	NA	no	NA
TCGA-D8-A1XA-01A	739cb132-51e9-41be-8064-311a13da0d74	a1xa	alive	0	839	NA	NA	NA	64	NA	NA	NA	NA	left upper outer quadrant	sentinel node biopsy alone	NA	NA	nationwide children's hospital	NA	NA	NA	tcga-d8-a1xa-f29434	23f14c5f-a612-4176-9b70-83c685679f1e	canonical	NA	positive	NA	NA	NA	NA	positive	lumpectomy	NA	NA	NA	NA	NA	no	21	3	NA	NA	-23387	0	0	NA	NA	no	NA
TCGA-D8-A1XB-01A	d2694b09-7844-4496-865c-5d3d8cd03330	a1xb	alive	0	552	NA	NA	NA	62	NA	NA	NA	NA	right upper outer quadrant	axillary lymph node dissection alone	NA	NA	nationwide children's hospital	NA	NA	NA	tcga-d8-a1xb-f29436	d58ee9e5-c9d2-46a5-b0d5-4de2a638de07	canonical	NA	positive	NA	NA	NA	NA	positive	modified radical mastectomy	NA	NA	NA	NA	NA	no	21	19	NA	NA	-22976	0	0	NA	NA	no	NA
TCGA-D8-A1XC-01A	ee14e049-b891-4dda-a730-8ce99bd93baf	a1xc	dead	377	377	NA	no	NA	85	NA	NA	NA	NA	right upper inner quadrant	axillary lymph node dissection alone	NA	NA	nationwide children's hospital	NA	NA	NA	tcga-d8-a1xc-f29439	27296384-e750-4a9e-9214-f7d9e9040b5b	canonical	NA	positive	NA	NA	NA	NA	positive	modified radical mastectomy	NA	NA	NA	NA	NA	no	21	26	NA	NA	-31220	0	0	NA	NA	no	NA
TCGA-D8-A1XD-01A	c4699748-f01d-4b30-9c74-1ca77fb84ac1	a1xd	alive	0	522	NA	NA	NA	36	NA	NA	NA	NA	left upper outer quadrant	axillary lymph node dissection alone	NA	NA	nationwide children's hospital	NA	NA	NA	tcga-d8-a1xd-f29440	ca295fc1-24c4-40f5-af2f-af0b56ce9b37	canonical	NA	positive	NA	NA	NA	NA	positive	modified radical mastectomy	NA	NA	NA	NA	NA	no	21	19	NA	NA	-13510	0	0	NA	NA	no	NA
TCGA-D8-A1XF-01A	6f6afd31-b5dd-48ab-b18f-6390ba18a5f0	a1xf	alive	0	463	NA	NA	NA	45	NA	NA	NA	NA	left upper outer quadrant	axillary lymph node dissection alone	NA	NA	nationwide children's hospital	NA	NA	NA	tcga-d8-a1xf-f29442	f9dfa106-1dbd-4eb8-9586-df8d2300fb35	canonical	NA	positive	NA	NA	NA	NA	positive	modified radical mastectomy	NA	NA	NA	NA	NA	no	21	19	NA	NA	-16787	0	0	NA	NA	no	NA
TCGA-D8-A1XG-01A	de531604-bd1a-49df-96c2-6de3ae703f1d	a1xg	alive	0	448	NA	NA	NA	86	NA	NA	NA	NA	right upper inner quadrant	axillary lymph node dissection alone	NA	NA	nationwide children's hospital	NA	NA	NA	tcga-d8-a1xg-f29444	f26cfc15-575e-4e12-b7a9-b4319f986ff9	canonical	NA	positive	NA	NA	NA	NA	negative	modified radical mastectomy	NA	NA	NA	NA	NA	yes	21	26	NA	NA	-31748	0	0	NA	NA	no	NA
TCGA-D8-A1XJ-01A	cc510968-fe52-4109-a79f-74f216b48c78	a1xj	alive	0	664	NA	NA	NA	76	left lower outer quadrant	NA	NA	NA	left upper outer quadrant	axillary lymph node dissection alone	NA	NA	nationwide children's hospital	NA	NA	NA	tcga-d8-a1xj-f30111	113c903f-41e1-4d93-b084-a99aaed7a32d	canonical	NA	positive	NA	NA	NA	NA	positive	modified radical mastectomy	NA	NA	NA	NA	NA	NA	21	2	NA	NA	-27967	0	0	NA	NA	no	NA
TCGA-D8-A1XK-01A	97943d87-fed7-4f14-a0a7-c5bfee64c392	a1xk	alive	0	441	NA	NA	NA	55	NA	NA	NA	NA	left lower inner quadrant	axillary lymph node dissection alone	NA	NA	nationwide children's hospital	NA	NA	NA	tcga-d8-a1xk-f30074	6e9797e4-9661-4bdd-9f1e-1ec2d1db381b	canonical	NA	negative	NA	NA	NA	NA	negative	modified radical mastectomy	NA	NA	NA	NA	NA	NA	21	4	NA	NA	-20092	0	0	NA	NA	no	NA
TCGA-D8-A1XL-01A	2b19a6b4-7a17-4452-b4aa-6fc18adc0c3c	a1xl	alive	0	606	NA	NA	NA	34	NA	NA	NA	NA	left upper outer quadrant	axillary lymph node dissection alone	NA	NA	nationwide children's hospital	NA	NA	NA	tcga-d8-a1xl-f29990	a52fc449-f807-4d82-ab8e-cdcf9b2484d4	canonical	NA	positive	NA	NA	NA	NA	positive	lumpectomy	NA	NA	NA	NA	NA	NA	21	31	NA	NA	-12668	0	0	NA	NA	no	NA
TCGA-D8-A1XM-01A	92529232-8504-4541-b7e2-4df8f497c413	a1xm	alive	0	538	NA	NA	NA	57	NA	NA	NA	NA	right upper inner quadrant	sentinel node biopsy alone	NA	NA	nationwide children's hospital	NA	NA	NA	tcga-d8-a1xm-f29445	581291c6-5f3c-4477-a478-0a083b71fc3a	canonical	NA	positive	NA	NA	NA	NA	positive	lumpectomy	NA	NA	NA	NA	NA	no	21	19	NA	NA	-21056	0	0	NA	NA	no	NA
TCGA-D8-A1XO-01A	6a186809-3422-41d0-83d2-867145830936	a1xo	alive	0	1682	NA	NA	NA	56	NA	NA	NA	NA	left lower outer quadrant	axillary lymph node dissection alone	NA	NA	nationwide children's hospital	NA	NA	NA	tcga-d8-a1xo-f72206	a139305d-b569-4f6f-b37f-3134fd222946	canonical	NA	positive	NA	NA	NA	NA	positive	modified radical mastectomy	NA	NA	NA	NA	NA	no	21	29	NA	NA	-20606	0	0	NA	NA	no	NA
TCGA-D8-A1XQ-01A	3886b4fb-ba22-4a50-b11a-a6893951f170	a1xq	alive	0	499	NA	NA	NA	69	NA	NA	NA	NA	right upper outer quadrant	axillary lymph node dissection alone	NA	NA	nationwide children's hospital	NA	NA	NA	tcga-d8-a1xq-f29449	e3365afc-09f9-4524-a456-5208c249283d	canonical	NA	negative	NA	NA	NA	NA	negative	modified radical mastectomy	NA	NA	NA	NA	NA	no	21	26	NA	NA	-25345	0	0	NA	NA	no	NA
TCGA-D8-A1XR-01A	70f34c5c-3671-44c8-9469-99f9786efec1	a1xr	alive	0	482	NA	NA	NA	56	NA	NA	NA	NA	right upper outer quadrant	axillary lymph node dissection alone	NA	NA	nationwide children's hospital	NA	NA	NA	tcga-d8-a1xr-f29451	1b14ab2d-aa4f-4bf6-9ae3-88dd7ef231a1	canonical	NA	positive	NA	NA	NA	NA	positive	modified radical mastectomy	NA	NA	NA	NA	NA	no	21	6	NA	NA	-20488	0	0	NA	NA	no	NA
TCGA-D8-A1XS-01A	1026e0bf-5640-4fa5-b65f-4f11e8e76b18	a1xs	alive	0	496	NA	NA	NA	48	NA	NA	NA	NA	left upper outer quadrant	axillary lymph node dissection alone	NA	NA	nationwide children's hospital	NA	NA	NA	tcga-d8-a1xs-f12133	49faf5ee-952c-4cbb-a2ef-e2e972f20185	canonical	NA	positive	NA	NA	NA	NA	positive	modified radical mastectomy	NA	NA	NA	NA	NA	no	21	19	NA	NA	-17708	0	0	NA	NA	no	NA
TCGA-D8-A1XT-01A	64975923-d032-4182-8565-59fc37127d8d	a1xt	alive	0	506	NA	NA	NA	61	NA	NA	NA	NA	right upper outer quadrant	axillary lymph node dissection alone	NA	NA	nationwide children's hospital	NA	NA	NA	tcga-d8-a1xt-f29454	1dbb325b-97fd-4160-a1db-1849297b9592	canonical	NA	negative	NA	NA	NA	NA	negative	modified radical mastectomy	NA	NA	NA	NA	NA	no	21	26	NA	NA	-22448	0	0	NA	NA	no	NA
TCGA-D8-A1XU-01A	332148f5-f070-4c20-8eb1-4d8c0673aa52	a1xu	alive	0	395	NA	NA	NA	56	NA	NA	NA	NA	left upper outer quadrant	sentinel node biopsy alone	NA	NA	nationwide children's hospital	NA	NA	NA	tcga-d8-a1xu-f29456	6f200e00-aaab-4ed7-a6a8-c21c9b30cf9e	canonical	negative	positive	NA	NA	NA	NA	positive	modified radical mastectomy	NA	NA	NA	NA	NA	no	21	26	NA	NA	-20715	0	0	NA	NA	no	NA
TCGA-D8-A1XV-01A	87b85935-a058-44ad-8fb6-8511130eaffe	a1xv	alive	0	461	NA	NA	NA	84	NA	NA	NA	NA	right lower inner quadrant	sentinel node biopsy alone	NA	NA	nationwide children's hospital	NA	NA	NA	tcga-d8-a1xv-f29457	a788378c-1ef4-49a8-b595-22c22a19823d	canonical	NA	positive	NA	NA	NA	NA	positive	modified radical mastectomy	NA	NA	NA	NA	NA	no	21	19	NA	NA	-30830	0	0	NA	NA	no	NA
TCGA-D8-A1XW-01A	887b9e5b-99db-44ac-9c30-c0dc6877b41c	a1xw	alive	0	1309	NA	NA	NA	53	NA	NA	NA	NA	left upper inner quadrant	sentinel lymph node biopsy plus axillary dissection	NA	NA	nationwide children's hospital	NA	NA	NA	tcga-d8-a1xw-f72205	46ca0608-ffca-4eec-aa1e-7739adcad4c2	canonical	NA	negative	NA	NA	NA	NA	positive	modified radical mastectomy	NA	NA	NA	NA	NA	no	21	29	NA	NA	-19478	0	0	NA	NA	no	NA
TCGA-D8-A1XY-01A	0130d616-885e-4a6c-9d03-2f17dd692a05	a1xy	alive	0	503	NA	NA	NA	74	NA	NA	NA	NA	left upper outer quadrant	axillary lymph node dissection alone	NA	NA	nationwide children's hospital	NA	NA	NA	tcga-d8-a1xy-f29994	85c03fe0-c6f1-4428-a4d2-749634fc006d	canonical	NA	positive	NA	NA	NA	NA	positive	simple mastectomy	NA	NA	NA	NA	NA	NA	21	31	NA	NA	-27106	0	0	NA	NA	no	NA
TCGA-D8-A1XZ-01A	2c90d5e3-ac8c-4c86-a06f-42ccc064eb49	a1xz	alive	0	466	NA	NA	NA	81	NA	NA	NA	NA	right lower inner quadrant	axillary lymph node dissection alone	NA	NA	nationwide children's hospital	NA	NA	NA	tcga-d8-a1xz-f30077	5898e4e8-0e20-482d-bf42-11b375146742	canonical	NA	positive	NA	NA	NA	NA	negative	modified radical mastectomy	NA	NA	NA	NA	NA	NA	21	2	NA	NA	-29916	0	0	NA	NA	no	NA
TCGA-D8-A1Y0-01A	ced2c048-b047-43ff-b0e7-cd7ad480850c	a1y0	alive	0	472	NA	NA	NA	65	NA	NA	NA	NA	left	axillary lymph node dissection alone	NA	NA	nationwide children's hospital	NA	NA	NA	tcga-d8-a1y0-f30080	a1cf1328-c069-4c74-80c9-4c569f082dc1	canonical	NA	positive	NA	NA	NA	NA	positive	modified radical mastectomy	NA	NA	NA	NA	NA	NA	21	2	NA	NA	-24083	0	0	NA	NA	no	NA
TCGA-D8-A1Y1-01A	38a631a1-6875-4216-a335-ee93c90a86d6	a1y1	dead	302	302	NA	NA	NA	80	left upper outer quadrant	NA	NA	NA	left upper inner quadrant	axillary lymph node dissection alone	NA	NA	nationwide children's hospital	NA	NA	NA	tcga-d8-a1y1-f30084	b147e8c4-f15b-4d80-98d2-281316f91ce1	canonical	NA	positive	NA	NA	NA	NA	positive	modified radical mastectomy	NA	NA	NA	NA	NA	NA	21	2	NA	NA	-29474	0	0	NA	NA	no	NA
TCGA-D8-A1Y2-01A	c7d7a770-23c0-4310-ab48-1f6152dc2849	a1y2	alive	0	433	NA	NA	NA	71	NA	NA	NA	NA	right lower outer quadrant	axillary lymph node dissection alone	NA	NA	nationwide children's hospital	NA	NA	NA	tcga-d8-a1y2-f30086	960bda3c-dbb7-4271-aebe-9c28bf0353a4	canonical	NA	positive	NA	NA	NA	NA	positive	modified radical mastectomy	NA	NA	NA	NA	NA	NA	21	2	NA	NA	-26021	0	0	NA	NA	no	NA
TCGA-D8-A1Y3-01A	632984bd-dc81-42b6-b024-476cfd0bb2ae	a1y3	alive	0	430	NA	NA	NA	61	NA	NA	NA	NA	right upper outer quadrant	axillary lymph node dissection alone	NA	NA	nationwide children's hospital	NA	NA	NA	tcga-d8-a1y3-f30088	796131a4-3877-4190-8790-8a92db48e978	canonical	NA	positive	NA	NA	NA	NA	positive	modified radical mastectomy	NA	NA	NA	NA	NA	NA	21	2	NA	NA	-22317	0	0	NA	NA	no	NA
TCGA-D8-A27E-01A	680f23a9-fcce-493e-b908-27c1ad202e4c	a27e	alive	0	530	NA	NA	NA	66	NA	NA	NA	NA	left upper inner quadrant	sentinel node biopsy alone	NA	NA	nationwide children's hospital	NA	NA	NA	tcga-d8-a27e-f30112	ab1218c8-cf64-40a3-80a9-654b1a5a0bd3	canonical	NA	positive	NA	NA	NA	NA	positive	NA	NA	NA	NA	NA	NA	no	21	2	NA	NA	-24315	0	0	NA	NA	no	NA
TCGA-D8-A27F-01A	1549dc64-3dab-43fc-96e9-b07d520957e1	a27f	alive	0	488	NA	NA	NA	40	NA	NA	NA	NA	right upper outer quadrant	axillary lymph node dissection alone	NA	NA	nationwide children's hospital	NA	NA	NA	tcga-d8-a27f-f29515	57370d31-378d-4228-9daa-39a366a418b6	canonical	NA	negative	NA	NA	NA	NA	negative	modified radical mastectomy	NA	NA	NA	NA	NA	no	21	21	NA	NA	-14731	0	0	NA	NA	no	NA
TCGA-D8-A27G-01A	6f6e7356-3521-4674-8eec-ad01340d4b8e	a27g	alive	0	409	NA	NA	NA	75	NA	NA	NA	NA	left lower outer quadrant	axillary lymph node dissection alone	NA	NA	nationwide children's hospital	NA	NA	NA	tcga-d8-a27g-f29519	370a2ac1-5396-4903-bd8b-07f1f32b4725	canonical	NA	positive	NA	NA	NA	NA	positive	modified radical mastectomy	NA	NA	NA	NA	NA	no	21	21	NA	NA	-27521	0	0	NA	NA	no	NA
TCGA-D8-A27H-01A	0dca98b0-f43e-45b6-9a02-00092c78678c	a27h	alive	0	397	NA	NA	NA	72	NA	NA	NA	NA	right upper outer quadrant	no axillary staging	NA	NA	nationwide children's hospital	NA	NA	NA	tcga-d8-a27h-f29536	24d385c9-d517-47c8-90b6-128c9b86c4ab	canonical	NA	negative	NA	NA	NA	NA	negative	modified radical mastectomy	NA	NA	NA	NA	NA	no	21	22	NA	NA	-26588	0	0	NA	NA	no	NA
TCGA-D8-A27I-01A	9c55032f-4db7-4026-ae83-8d060dd8e3fe	a27i	alive	0	439	NA	NA	NA	58	NA	NA	NA	NA	right upper outer quadrant	axillary lymph node dissection alone	NA	NA	nationwide children's hospital	NA	NA	NA	tcga-d8-a27i-f29521	174b98dc-4e11-40ca-a49e-0ea85c0029e0	canonical	NA	positive	NA	NA	NA	NA	positive	modified radical mastectomy	NA	NA	NA	NA	NA	no	21	21	NA	NA	-21327	0	0	NA	NA	no	NA
TCGA-D8-A27K-01A	7f97971b-2818-4e4b-9c9e-7c0246f9484c	a27k	alive	0	1461	NA	NA	NA	47	NA	NA	NA	NA	left upper inner quadrant	axillary lymph node dissection alone	NA	NA	nationwide children's hospital	NA	NA	NA	tcga-d8-a27k-f72201	a434782b-9e68-4cab-9dc0-41af7599933f	canonical	NA	positive	NA	NA	NA	NA	positive	modified radical mastectomy	NA	NA	NA	NA	NA	no	21	29	NA	NA	-17426	0	0	NA	NA	no	NA
TCGA-D8-A27L-01A	6020d1b4-ee20-4cc9-82a3-340b5e3122f1	a27l	alive	0	499	NA	NA	NA	49	NA	NA	NA	NA	right upper inner quadrant	sentinel lymph node biopsy plus axillary dissection	NA	NA	nationwide children's hospital	NA	NA	NA	tcga-d8-a27l-f29590	f7c1db5b-81ce-49d1-89ae-3c672eae8635	canonical	NA	positive	NA	NA	NA	NA	positive	modified radical mastectomy	NA	NA	NA	NA	NA	no	21	26	NA	NA	-18025	0	0	NA	NA	no	NA
TCGA-D8-A27M-01A	ae65baeb-6b78-492a-8c63-bb7e93e83dc2	a27m	alive	0	410	NA	NA	NA	59	NA	NA	NA	NA	left upper outer quadrant	sentinel node biopsy alone	NA	NA	nationwide children's hospital	NA	NA	NA	tcga-d8-a27m-f29592	f7028889-8575-484f-8c51-2f75da0740bc	canonical	NA	negative	NA	NA	NA	NA	negative	modified radical mastectomy	NA	NA	NA	NA	NA	no	21	26	NA	NA	-21910	0	0	NA	NA	no	NA
TCGA-D8-A27N-01A	d5be2ab3-f748-480d-954b-385cf01b4c81	a27n	alive	0	519	NA	NA	NA	36	NA	NA	NA	NA	right upper outer quadrant	axillary lymph node dissection alone	NA	NA	nationwide children's hospital	NA	NA	NA	tcga-d8-a27n-f29594	3121479e-1aae-4f1e-98ca-0ed26bdcc3cf	canonical	NA	positive	NA	NA	NA	NA	positive	modified radical mastectomy	NA	NA	NA	NA	NA	no	21	26	NA	NA	-13243	0	0	NA	NA	no	NA
TCGA-D8-A27P-01A	c54d5507-bba5-4a1e-8885-3c3b1eed13c1	a27p	alive	0	49	NA	NA	NA	64	NA	NA	NA	NA	right upper inner quadrant	sentinel node biopsy alone	NA	NA	nationwide children's hospital	NA	NA	NA	tcga-d8-a27p-f29596	0a7ebf73-2279-485b-af1c-e49cdb81922f	canonical	NA	positive	NA	NA	NA	NA	positive	modified radical mastectomy	NA	NA	NA	NA	NA	no	21	26	NA	NA	-23576	0	0	NA	NA	no	NA
TCGA-D8-A27R-01A	0b23b5fe-6c7e-4297-bc55-f93fcb830ac4	a27r	alive	0	307	NA	NA	NA	41	NA	NA	NA	NA	right upper outer quadrant	axillary lymph node dissection alone	NA	NA	nationwide children's hospital	NA	NA	NA	tcga-d8-a27r-f29701	129d0e3e-3420-4e29-8434-91ecc7a3e6c3	canonical	NA	positive	NA	NA	NA	NA	positive	modified radical mastectomy	NA	NA	NA	NA	NA	no	21	28	NA	NA	-15122	0	0	NA	NA	no	NA
TCGA-D8-A27T-01A	27c1c094-690b-4973-8900-a797ad88f98c	a27t	alive	0	398	NA	NA	NA	53	right lower outer quadrant	NA	NA	NA	right upper outer quadrant	sentinel lymph node biopsy plus axillary dissection	NA	NA	nationwide children's hospital	NA	NA	NA	tcga-d8-a27t-f30096	2b56379d-571e-4b7b-b40d-9720573c8983	canonical	NA	positive	NA	NA	NA	NA	positive	simple mastectomy	NA	NA	NA	NA	NA	no	21	2	NA	NA	-19591	0	0	NA	NA	no	NA
TCGA-D8-A27V-01A	ad6d26ab-6568-40db-bfb0-394d40e801cf	a27v	alive	0	381	NA	NA	NA	62	right lower outer quadrant	NA	NA	NA	right upper outer quadrant	sentinel node biopsy alone	NA	NA	nationwide children's hospital	NA	NA	NA	tcga-d8-a27v-f30105	e413e78a-b9cb-4d48-8ca1-3f5c41e8e3b0	canonical	NA	positive	NA	NA	NA	NA	positive	simple mastectomy	NA	NA	NA	NA	NA	no	21	29	NA	NA	-22958	0	0	NA	NA	no	NA
TCGA-D8-A27W-01A	bfa3dbc0-361c-400e-8c10-0aca7049fce9	a27w	alive	0	373	NA	NA	NA	55	NA	NA	NA	NA	right	axillary lymph node dissection alone	NA	NA	nationwide children's hospital	NA	NA	NA	tcga-d8-a27w-f30107	12e2db12-f8a5-49d9-a51c-012731462de5	canonical	NA	positive	NA	NA	NA	NA	positive	modified radical mastectomy	NA	NA	NA	NA	NA	no	21	2	NA	NA	-20173	0	0	NA	NA	no	NA
TCGA-D8-A3Z5-01A	77e25ae8-82ec-4dea-8e62-1176f27e47ba	a3z5	alive	0	1015	NA	NA	NA	54	NA	NA	NA	NA	right	other (specify)	mastectomy with tlnd	NA	nationwide children's hospital	NA	NA	NA	tcga-d8-a3z5-f57869	fbae89fd-f5b0-4393-928b-00c4dad6776e	canonical	NA	positive	NA	NA	NA	NA	positive	simple mastectomy	NA	NA	NA	NA	NA	no	21	28	NA	NA	-19846	0	0	NA	NA	no	NA
TCGA-D8-A3Z6-01A	a6e5f869-1182-4f81-b4bb-cf55261c8f3f	a3z6	alive	0	563	NA	NA	NA	56	NA	NA	NA	NA	left	other (specify)	mastectomy with tlnd	NA	nationwide children's hospital	NA	NA	NA	tcga-d8-a3z6-f51367	9dd39b06-7d2b-4656-9c5f-90aaa50d3a64	canonical	NA	positive	NA	NA	NA	NA	positive	modified radical mastectomy	NA	NA	NA	NA	NA	no	21	18	NA	NA	-20629	0	0	NA	NA	no	NA
TCGA-D8-A4Z1-01A	80419545-4e5d-4baf-8948-f84589b5ef3e	a4z1	alive	0	659	NA	NA	NA	68	right upper inner quadrant	NA	NA	NA	right	no axillary staging	NA	NA	nationwide children's hospital	NA	NA	NA	tcga-d8-a4z1-f58485	00555ac3-b1c1-4712-a6cd-9fdf98f9d2b3	canonical	NA	positive	NA	NA	NA	NA	positive	simple mastectomy	NA	NA	NA	NA	NA	no	21	11	NA	NA	-25097	0	0	NA	NA	NA	NA
TCGA-D8-A73U-01A	96f02be7-f2df-483c-8968-a5bd2d887206	a73u	alive	0	492	NA	NA	NA	88	NA	NA	NA	NA	left upper outer quadrant	sentinel lymph node biopsy plus axillary dissection	NA	NA	nationwide children's hospital	NA	NA	NA	tcga-d8-a73u-f57871	66fb6cc5-35c7-47cf-9fb4-63e3db488520	canonical	NA	positive	NA	NA	NA	NA	positive	simple mastectomy	NA	NA	NA	NA	NA	no	21	28	NA	NA	-32208	0	0	NA	NA	NA	NA
TCGA-D8-A73W-01A	ea8dbc7a-54c6-469c-865e-f49d00b0223d	a73w	dead	385	385	NA	NA	NA	79	NA	NA	NA	NA	right upper outer quadrant	axillary lymph node dissection alone	NA	NA	nationwide children's hospital	NA	NA	NA	tcga-d8-a73w-f72197	8cd03de3-d51f-4514-b1a4-cc559a84b5c3	canonical	NA	positive	NA	NA	NA	NA	negative	simple mastectomy	NA	NA	NA	NA	NA	no	21	29	NA	NA	-29125	0	0	NA	NA	NA	NA
TCGA-D8-A73X-01A	1be375fe-5ae5-4e75-a729-69f86a661d9a	a73x	alive	0	767	NA	NA	NA	53	NA	NA	NA	NA	left upper outer quadrant	sentinel node biopsy alone	NA	NA	nationwide children's hospital	NA	NA	NA	tcga-d8-a73x-f72193	a7b1b400-8e75-4de4-ac2c-60d227a635e6	canonical	NA	positive	NA	NA	NA	NA	positive	simple mastectomy	NA	NA	NA	NA	NA	no	21	29	NA	NA	-19607	0	0	NA	NA	NA	NA
TCGA-E2-A105-01A	b0bcb829-cee0-4247-bb75-093a5bea89ee	a105	alive	0	1308	NA	NA	NA	79	NA	NA	NA	NA	left upper inner quadrant	sentinel node biopsy alone	NA	NA	nationwide children's hospital	NA	NA	NA	tcga-e2-a105-f17431	98cf51c1-3d09-49b5-a0f2-bd06db419082	canonical	NA	positive	NA	NA	NA	NA	positive	lumpectomy	NA	NA	NA	NA	NA	no	21	9	NA	NA	-28855	0	0	NA	NA	NA	NA
TCGA-E2-A106-01A	87e09544-eddb-473b-8617-212407ce644e	a106	alive	0	2541	NA	NA	NA	34	NA	NA	NA	NA	right upper outer quadrant	sentinel lymph node biopsy plus axillary dissection	NA	NA	nationwide children's hospital	NA	NA	NA	tcga-e2-a106-f70397	86e020fa-8617-4bfb-855c-06da3c5ecfd9	canonical	negative	positive	NA	NA	NA	other	positive	simple mastectomy	inner-upper margin re-excision	NA	NA	NA	NA	no	21	17	NA	NA	-12528	0	0	NA	NA	NA	NA
TCGA-E2-A107-01A	eff2360e-399a-4167-ab2b-798e27bef739	a107	alive	0	1047	NA	NA	NA	54	NA	NA	NA	NA	right upper inner quadrant	sentinel lymph node biopsy plus axillary dissection	NA	NA	nationwide children's hospital	NA	NA	NA	tcga-e2-a107-f17173	c7d2518b-f2de-4b90-93b3-ea2f681e4044	canonical	NA	positive	NA	NA	NA	NA	negative	simple mastectomy	NA	NA	NA	NA	NA	no	21	28	NA	NA	-20065	0	0	NA	NA	NA	NA
TCGA-E2-A108-01A	4f04bd10-9902-4a23-b15d-4f4409d79499	a108	alive	0	837	NA	NA	NA	64	NA	NA	NA	NA	right upper outer quadrant	NA	NA	NA	nationwide children's hospital	NA	NA	NA	tcga-e2-a108-f17423	a33b2d82-e56a-4069-9f2e-d9eed8eeafba	canonical	NA	positive	NA	NA	NA	NA	positive	lumpectomy	NA	NA	NA	NA	NA	NA	21	28	NA	NA	-23530	0	0	NA	NA	NA	NA
TCGA-E2-A109-01A	f0787165-6f58-4d67-b510-928eea2c4882	a109	alive	0	1417	NA	NA	NA	64	NA	NA	NA	NA	right upper outer quadrant	sentinel node biopsy alone	NA	NA	nationwide children's hospital	NA	NA	NA	tcga-e2-a109-f17418	52dadcdc-5f66-4c71-8d5f-3bce69f19291	canonical	NA	positive	NA	NA	NA	NA	negative	simple mastectomy	NA	NA	NA	NA	NA	no	21	9	NA	NA	-23521	0	0	NA	NA	NA	NA
TCGA-E2-A10A-01A	4da7abaf-ac7a-41c0-8033-5780a398545c	a10a	alive	0	1229	NA	no	NA	41	NA	NA	NA	NA	left upper outer quadrant	sentinel node biopsy alone	NA	NA	nationwide children's hospital	NA	NA	NA	tcga-e2-a10a-f17522	80443d13-7053-4dee-ab14-7199df35b8fd	canonical	NA	positive	NA	NA	NA	NA	positive	simple mastectomy	NA	NA	NA	NA	NA	no	21	12	NA	NA	-15085	0	0	NA	NA	NA	NA
TCGA-E2-A10B-01A	f801aeed-dc43-49d7-a319-84c8851979d9	a10b	alive	0	1141	NA	yes	NA	67	NA	NA	NA	NA	left lower outer quadrant	sentinel lymph node biopsy plus axillary dissection	NA	NA	nationwide children's hospital	NA	NA	NA	tcga-e2-a10b-f17370	276dd2fd-d528-42ef-a703-fd3cc598295e	canonical	NA	positive	NA	NA	NA	NA	positive	lumpectomy	NA	NA	NA	NA	NA	no	21	19	NA	195	-24577	0	0	NA	NA	NA	NA
TCGA-E2-A10C-01A	9ac44381-5d43-4f63-aa3f-7703bfc923c9	a10c	alive	0	1220	NA	NA	NA	54	NA	NA	NA	NA	left upper outer quadrant	sentinel lymph node biopsy plus axillary dissection	NA	NA	nationwide children's hospital	NA	NA	NA	tcga-e2-a10c-f17357	19e548df-f99c-484b-84c4-c93e7fa746c6	canonical	NA	positive	NA	NA	NA	NA	positive	lumpectomy	NA	NA	NA	NA	NA	no	21	26	NA	NA	-19849	0	0	NA	NA	NA	NA
TCGA-E2-A10E-01A	dc15a8ae-991e-421c-bc70-70e94f79dd17	a10e	alive	0	865	NA	NA	NA	64	NA	NA	NA	NA	left	sentinel lymph node biopsy plus axillary dissection	NA	NA	nationwide children's hospital	NA	NA	NA	tcga-e2-a10e-f17248	b250e415-a582-4263-a230-f81b31f7f5f5	canonical	NA	positive	NA	NA	NA	NA	positive	simple mastectomy	NA	NA	NA	NA	NA	no	21	26	NA	NA	-23684	0	0	NA	NA	NA	NA
TCGA-E2-A10F-01A	8e159b50-8136-42d4-b9c7-d579a74e4931	a10f	alive	0	878	NA	NA	NA	47	NA	NA	NA	NA	left upper outer quadrant	sentinel node biopsy alone	NA	NA	nationwide children's hospital	NA	NA	NA	tcga-e2-a10f-f17187	30af5ac3-356d-445f-ab37-b36be75ae6eb	canonical	NA	positive	NA	NA	NA	NA	positive	lumpectomy	NA	NA	NA	NA	NA	no	21	27	NA	NA	-17257	0	0	NA	NA	NA	NA
TCGA-E2-A14N-01A	752ad011-79e0-494f-9868-98bf6feb28f8	a14n	alive	0	1434	NA	NA	NA	37	NA	NA	NA	NA	right upper inner quadrant	sentinel lymph node biopsy plus axillary dissection	NA	NA	nationwide children's hospital	NA	NA	NA	tcga-e2-a14n-f19154	374da424-b865-46d4-a433-f702c840cf36	canonical	NA	negative	NA	NA	NA	NA	negative	simple mastectomy	NA	NA	NA	NA	NA	no	21	17	NA	NA	-13743	0	0	NA	NA	no	NA
TCGA-E2-A14O-01A	fb356957-f620-4d99-b675-1355a1d9f932	a14o	alive	0	1359	NA	NA	NA	76	NA	NA	NA	NA	left upper outer quadrant	sentinel lymph node biopsy plus axillary dissection	NA	NA	nationwide children's hospital	NA	NA	NA	tcga-e2-a14o-f18521	d8933de8-a517-4142-9c1d-e9cb01f4932f	canonical	NA	positive	NA	NA	NA	NA	positive	modified radical mastectomy	NA	NA	NA	NA	NA	no	21	19	NA	NA	-27837	0	0	NA	NA	no	NA
TCGA-E2-A14P-01A	e4fc0909-f284-4471-866d-d8967b6adcbc	a14p	alive	0	1246	NA	NA	NA	79	NA	NA	NA	NA	right upper outer quadrant	axillary lymph node dissection alone	NA	NA	nationwide children's hospital	NA	NA	NA	tcga-e2-a14p-f18846	28693aec-5f7f-45b2-bea4-2250e4909dbe	canonical	NA	negative	NA	NA	NA	NA	negative	lumpectomy	NA	NA	NA	NA	NA	no	21	20	NA	NA	-28923	0	0	NA	NA	no	NA
TCGA-E2-A14Q-01A	303a1d77-a37a-4966-a4a4-9981d99ba1b4	a14q	alive	0	1163	NA	NA	NA	50	NA	NA	NA	NA	left upper outer quadrant	sentinel lymph node biopsy plus axillary dissection	NA	NA	nationwide children's hospital	NA	NA	NA	tcga-e2-a14q-f18800	d5d37217-a5a0-4f1e-a521-f1e6125491b4	canonical	NA	positive	NA	NA	NA	NA	positive	lumpectomy	NA	NA	NA	NA	NA	no	21	20	NA	NA	-18507	0	0	NA	NA	no	NA
TCGA-E2-A14R-01A	4fba3deb-db94-44b5-a0f2-a575d270779e	a14r	alive	0	1174	NA	yes	NA	62	NA	NA	NA	NA	left	sentinel lymph node biopsy plus axillary dissection	NA	NA	nationwide children's hospital	NA	NA	NA	tcga-e2-a14r-f18838	818079a8-a928-4ac6-9779-e8a587d960db	canonical	NA	negative	NA	NA	NA	NA	negative	lumpectomy	NA	NA	NA	NA	NA	no	21	24	NA	971	-22686	0	0	NA	NA	no	NA
TCGA-E2-A14S-01A	c2b104ee-f914-4e79-9e1b-56bf88157472	a14s	alive	0	1009	NA	NA	NA	65	NA	NA	NA	NA	left lower outer quadrant	sentinel node biopsy alone	NA	NA	nationwide children's hospital	NA	NA	NA	tcga-e2-a14s-f18831	ba1a9fea-bc27-4cf3-95a9-65e53b46b582	canonical	NA	positive	NA	NA	NA	NA	positive	lumpectomy	NA	NA	NA	NA	NA	no	21	3	NA	NA	-23878	0	0	NA	NA	no	NA
TCGA-E2-A14T-01A	e0929c47-cff3-4518-a188-8764af01073a	a14t	alive	0	2311	NA	NA	NA	52	NA	NA	NA	NA	left upper inner quadrant	sentinel node biopsy alone	NA	NA	nationwide children's hospital	NA	NA	NA	tcga-e2-a14t-f70396	a5c92857-abed-45d2-8326-e7a5dfa71b1f	canonical	NA	positive	NA	NA	NA	NA	positive	simple mastectomy	NA	NA	NA	NA	NA	no	21	17	NA	NA	-19237	0	0	NA	NA	no	NA
TCGA-E2-A14U-01A	23b7aaea-1119-4b10-aa1a-0ae255d2f2a6	a14u	alive	0	1318	NA	NA	NA	74	NA	NA	NA	NA	right upper outer quadrant	other (specify)	sentinel lymph node dissection	NA	nationwide children's hospital	NA	NA	NA	tcga-e2-a14u-f33622	573201b2-5807-4344-a976-9996b93eae55	canonical	NA	positive	NA	NA	NA	NA	positive	lumpectomy	NA	NA	NA	NA	NA	no	21	11	NA	NA	-27389	0	0	NA	NA	no	NA
TCGA-E2-A14V-01A	3144f1fb-4342-4079-bfe8-940da4bfd88e	a14v	alive	0	1042	NA	NA	NA	53	NA	NA	NA	NA	left lower inner quadrant	sentinel lymph node biopsy plus axillary dissection	NA	NA	nationwide children's hospital	NA	NA	NA	tcga-e2-a14v-f18870	ffa983cc-57d9-4557-b5bb-bcd3d09cb1ce	canonical	NA	positive	3 point scale	NA	3 point scale	NA	positive	lumpectomy	NA	NA	NA	NA	NA	no	21	4	NA	NA	-19643	0	0	NA	NA	no	NA
TCGA-E2-A14W-01A	eadb0562-2165-4adb-ad58-018e73f82780	a14w	alive	0	974	NA	NA	NA	78	NA	NA	NA	NA	left upper outer quadrant	sentinel node biopsy alone	NA	NA	nationwide children's hospital	NA	NA	NA	tcga-e2-a14w-f18803	76297030-41ed-487b-b704-02c9e748ccc0	canonical	NA	positive	3 point scale	NA	3 point scale	NA	positive	simple mastectomy	NA	NA	NA	NA	NA	no	21	4	NA	NA	-28664	0	0	NA	NA	no	NA
TCGA-E2-A14X-01A	60df7543-6da5-4c75-943b-5800c1e08234	a14x	alive	0	972	NA	NA	NA	55	NA	NA	NA	NA	right upper outer quadrant	sentinel lymph node biopsy plus axillary dissection	NA	NA	nationwide children's hospital	NA	NA	NA	tcga-e2-a14x-f18857	02df16e7-ce1f-4746-952c-b32f958ef48b	canonical	NA	negative	NA	NA	NA	NA	negative	lumpectomy	NA	NA	NA	NA	NA	no	21	4	NA	NA	-20105	0	0	NA	NA	no	NA
TCGA-E2-A14Y-01A	a0576d44-9add-429b-9eeb-f7b234b7385f	a14y	alive	0	2109	NA	NA	NA	35	NA	NA	NA	NA	right	sentinel node biopsy alone	NA	NA	nationwide children's hospital	germline comparison	NA	case matched methylation control	tcga-e2-a14y-f70401	69dd5ac7-10eb-49c5-b9c9-cce7b1f28459	canonical - plus	NA	positive	NA	NA	NA	NA	positive	simple mastectomy	NA	NA	NA	NA	NA	no	21	17	NA	NA	-13004	0	0	NA	NA	no	NA
TCGA-E2-A14Z-01A	d7ce6b79-f7c0-481e-9dbd-6273f01c9786	a14z	dead	563	563	NA	no	NA	64	NA	NA	NA	NA	left upper outer quadrant	sentinel node biopsy alone	NA	NA	nationwide children's hospital	NA	NA	NA	tcga-e2-a14z-f18792	38e35f76-597f-4510-8395-8a019391ee04	canonical	NA	positive	NA	NA	NA	NA	positive	lumpectomy	NA	NA	NA	NA	NA	no	21	28	NA	NA	-23682	0	0	NA	NA	no	NA
TCGA-E2-A150-01A	4ac693e9-10f3-46b3-9d46-df3af7b0d259	a150	alive	0	1935	NA	NA	NA	48	NA	NA	NA	NA	left upper outer quadrant	sentinel node biopsy alone	NA	NA	nationwide children's hospital	NA	NA	NA	tcga-e2-a150-f71066	f53af7a3-7480-40a2-99d1-87493c41a28f	canonical	NA	negative	NA	NA	NA	NA	negative	lumpectomy	NA	NA	NA	NA	NA	no	21	18	NA	NA	-17580	0	0	NA	NA	no	NA
TCGA-E2-A152-01A	a8015490-9740-45c9-8bd2-eb6d1beefc2e	a152	alive	0	2128	NA	no	NA	56	NA	NA	NA	NA	right upper inner quadrant	sentinel node biopsy alone	NA	NA	nationwide children's hospital	NA	NA	NA	tcga-e2-a152-f72471	f8357f98-0281-4fe8-9b0b-288221e20b2d	canonical	NA	positive	NA	NA	NA	NA	negative	lumpectomy	NA	NA	NA	NA	NA	no	21	23	NA	NA	-20705	0	0	NA	NA	no	NA
TCGA-E2-A153-01A	be9bf36a-12e1-4386-addf-1686dc8b49de	a153	alive	0	707	NA	NA	NA	51	NA	NA	NA	NA	left	sentinel lymph node biopsy plus axillary dissection	NA	NA	nationwide children's hospital	case matched methylation control	germline comparison	case matched expression control	tcga-e2-a153-f18945	3d500678-49cd-4335-9a43-ac504de9e2b6	canonical - plus	NA	positive	NA	NA	NA	NA	positive	modified radical mastectomy	NA	NA	NA	NA	NA	no	21	8	NA	NA	-18875	0	0	NA	NA	no	NA
TCGA-E2-A154-01A	24e39609-9645-43e5-960b-db5446eaea65	a154	alive	0	591	NA	NA	NA	68	NA	NA	NA	NA	left upper outer quadrant	sentinel node biopsy alone	NA	NA	nationwide children's hospital	NA	NA	NA	tcga-e2-a154-f18940	640b6b5f-8868-48c5-bb54-8bcad1124002	canonical	NA	positive	3 point scale	NA	3 point scale	NA	positive	lumpectomy	NA	NA	NA	NA	NA	no	21	8	NA	NA	-24999	0	0	NA	NA	no	NA
TCGA-E2-A155-01A	01f50abf-fc15-446e-9d07-edeecc545a32	a155	alive	0	640	NA	NA	NA	58	left lower inner quadrant	NA	NA	NA	left upper inner quadrant	axillary lymph node dissection alone	NA	NA	nationwide children's hospital	NA	NA	NA	tcga-e2-a155-f18942	35a9196f-3e2c-44fe-822f-32fb066756a0	canonical	NA	positive	NA	NA	NA	NA	negative	modified radical mastectomy	NA	NA	NA	NA	NA	no	21	8	NA	NA	-21348	0	0	NA	NA	no	NA
TCGA-E2-A156-01A	f05d314c-5ec5-4e2a-b785-9a702716f111	a156	alive	0	726	NA	NA	NA	61	NA	NA	NA	NA	left	sentinel node biopsy alone	NA	NA	nationwide children's hospital	NA	NA	NA	tcga-e2-a156-f18786	9e28761c-ebc4-40ab-9207-41291c7d40e8	canonical	NA	positive	NA	NA	NA	NA	positive	lumpectomy	NA	NA	NA	NA	NA	no	21	8	NA	NA	-22422	0	0	NA	NA	no	NA
TCGA-E2-A159-01A	d7308344-5bab-4073-bb4f-4d8cd8d7bd17	a159	alive	0	762	NA	NA	NA	50	NA	NA	NA	NA	left lower outer quadrant	sentinel node biopsy alone	NA	NA	nationwide children's hospital	NA	NA	NA	tcga-e2-a159-f19115	0c4fdb82-9ef8-4d7e-9a24-4b151317f7f1	canonical	NA	negative	NA	NA	NA	NA	negative	lumpectomy	NA	NA	NA	NA	NA	no	21	8	NA	NA	-18621	0	0	NA	NA	no	NA
TCGA-E2-A15A-01A	73ccc949-01b7-48d3-a7c4-c4bcd261672a	a15a	alive	0	710	NA	NA	NA	45	NA	NA	NA	NA	left	sentinel lymph node biopsy plus axillary dissection	NA	NA	nationwide children's hospital	NA	NA	primary tumor and metastatic tumor(s)	tcga-e2-a15a-f18926	89f6bf10-db74-4bb3-b5dc-b8c065538cdb	canonical - plus	NA	positive	NA	NA	NA	NA	positive	simple mastectomy	NA	NA	NA	NA	NA	no	21	10	NA	NA	-16750	0	0	NA	NA	no	NA
TCGA-E2-A15C-01A	da840a22-8d30-4682-bbd0-8fa87bd40528	a15c	alive	0	694	NA	NA	NA	61	NA	NA	NA	NA	right lower outer quadrant	sentinel node biopsy alone	NA	NA	nationwide children's hospital	NA	NA	NA	tcga-e2-a15c-f18935	c22968bc-ce2c-417d-b613-7801b0f89a52	canonical	NA	positive	NA	NA	NA	NA	positive	lumpectomy	NA	NA	NA	NA	NA	no	21	9	NA	NA	-22583	0	0	NA	NA	no	NA
TCGA-E2-A15D-01A	c85f080a-1075-41df-959f-1b514a11b3c4	a15d	alive	0	526	NA	NA	NA	47	NA	NA	NA	NA	right	sentinel node biopsy alone	NA	NA	nationwide children's hospital	NA	NA	NA	tcga-e2-a15d-f18783	3c9904fc-1b91-4fbd-b16d-f2fbbae64a14	canonical	NA	positive	NA	NA	NA	NA	positive	lumpectomy	NA	NA	NA	NA	NA	no	21	9	NA	NA	-17224	0	0	NA	NA	no	NA
TCGA-E2-A15E-01A	0a2a3529-f645-4967-9a58-89ee20b8bb62	a15e	alive	0	630	NA	NA	NA	40	NA	NA	NA	NA	left	sentinel lymph node biopsy plus axillary dissection	NA	NA	nationwide children's hospital	NA	NA	primary tumor and metastatic tumor(s)	tcga-e2-a15e-f18919	d9946a73-a046-481d-a377-e617a25bb8fb	canonical - plus	NA	positive	NA	NA	NA	NA	positive	lumpectomy	NA	NA	NA	NA	NA	no	21	9	NA	NA	-14894	0	0	NA	NA	no	NA
TCGA-E2-A15F-01A	ec77a23d-84f5-47e4-bf2a-fa1c03baf3db	a15f	alive	0	658	NA	NA	NA	64	NA	NA	NA	NA	left upper outer quadrant	sentinel node biopsy alone	NA	NA	nationwide children's hospital	NA	NA	NA	tcga-e2-a15f-f18906	b97a662c-1e3b-4e86-a42a-e23819047d85	canonical	NA	positive	3 point scale	3+	3 point scale	NA	positive	lumpectomy	NA	NA	NA	NA	NA	no	21	10	NA	NA	-23660	0	0	NA	NA	no	NA
TCGA-E2-A15G-01A	271e8024-a008-4bf0-9f6e-177f60096b1b	a15g	alive	0	554	NA	NA	NA	76	NA	NA	NA	NA	left upper outer quadrant	sentinel node biopsy alone	NA	NA	nationwide children's hospital	NA	NA	NA	tcga-e2-a15g-f18901	119a323c-cf89-4041-add3-34af96d44cee	canonical	NA	positive	NA	NA	NA	NA	positive	lumpectomy	NA	NA	NA	NA	NA	no	21	14	NA	NA	-28013	0	0	NA	NA	no	NA
TCGA-E2-A15H-01A	5580b21a-2cdb-4777-ad79-6e06654144f5	a15h	alive	0	393	NA	NA	NA	38	NA	NA	NA	NA	right upper outer quadrant	sentinel node biopsy alone	NA	NA	nationwide children's hospital	NA	NA	NA	tcga-e2-a15h-f18916	4d718a1d-4604-4750-ac77-52e35846b82e	canonical	NA	positive	NA	NA	NA	NA	positive	lumpectomy	NA	NA	NA	NA	NA	no	21	14	NA	NA	-13985	0	0	NA	NA	no	NA
TCGA-E2-A15I-01A	64089c20-939f-48b4-ae8b-904ad0597145	a15i	alive	0	1692	NA	NA	NA	44	left lower outer quadrant	NA	NA	NA	left upper outer quadrant	sentinel node biopsy alone	NA	NA	nationwide children's hospital	case matched methylation control	germline comparison	case matched expression control	tcga-e2-a15i-f70023	6fdf2ba1-9d26-4621-a9b4-d4cd25811db6	canonical - plus	NA	positive	3 point scale	NA	3 point scale	NA	positive	simple mastectomy	NA	NA	NA	NA	NA	no	21	9	NA	NA	-16163	0	0	NA	NA	no	NA
TCGA-E2-A15J-01A	1fef9454-b3e8-4d9d-a9aa-aa1f1a32b80c	a15j	alive	0	1640	NA	NA	NA	51	NA	NA	NA	NA	left upper outer quadrant	sentinel node biopsy alone	NA	NA	nationwide children's hospital	NA	NA	NA	tcga-e2-a15j-f70020	ea54e7e2-d8ff-48c4-8b88-f15c664136df	canonical	NA	positive	NA	NA	NA	NA	positive	simple mastectomy	NA	NA	NA	NA	NA	no	21	9	NA	NA	-18771	0	0	NA	NA	no	NA
TCGA-E2-A15K-01A	17c1d42c-cb84-4655-a4cd-b54bae17ecaf	a15k	alive	0	275	NA	NA	NA	58	NA	NA	NA	NA	right upper outer quadrant	axillary lymph node dissection alone	NA	NA	nationwide children's hospital	NA	NA	primary tumor and metastatic tumor(s)	tcga-e2-a15k-f18869	0c192618-60f0-4ed8-b0ba-0873916821ee	canonical - plus	NA	positive	NA	NA	NA	NA	positive	lumpectomy	NA	NA	NA	NA	NA	no	21	15	NA	NA	-21514	0	0	NA	NA	no	NA
TCGA-E2-A15L-01A	37242f5a-25ae-4b1f-9ce6-09ce1dc92539	a15l	alive	0	626	NA	NA	NA	65	NA	NA	NA	NA	right	sentinel node biopsy alone	NA	NA	nationwide children's hospital	germline comparison	NA	case matched methylation control	tcga-e2-a15l-f18885	ca37a855-fa95-4fbe-a554-b8424df1544f	canonical - plus	NA	positive	NA	NA	NA	NA	positive	simple mastectomy	NA	NA	NA	NA	NA	no	21	15	NA	NA	-23845	0	0	NA	NA	no	NA
TCGA-E2-A15M-01A	59be60a3-e0f6-4d63-b98c-574ef92428c4	a15m	dead	336	336	NA	NA	NA	66	NA	NA	NA	NA	right lower outer quadrant	sentinel node biopsy alone	NA	NA	nationwide children's hospital	case matched methylation control	germline comparison	case matched expression control	tcga-e2-a15m-f18852	65d32d89-b105-414f-a57d-98cfb36f9863	canonical - plus	NA	positive	NA	NA	NA	NA	positive	lumpectomy	NA	NA	NA	NA	NA	no	21	15	NA	NA	-24266	0	0	NA	NA	no	NA
TCGA-E2-A15P-01A	a1674d7b-787a-45c4-bf16-1b7d0efce207	a15p	alive	0	595	NA	NA	NA	61	NA	NA	NA	NA	right upper outer quadrant	sentinel node biopsy alone	NA	NA	nationwide children's hospital	NA	NA	NA	tcga-e2-a15p-f19144	ff988b0b-a019-44fd-8cb3-0def979a82d9	canonical	NA	positive	NA	NA	NA	NA	positive	lumpectomy	NA	NA	NA	NA	NA	no	21	16	NA	NA	-22524	0	0	NA	NA	no	NA
TCGA-E2-A15R-01A	33b7bf50-53f4-4839-aa83-9665f85671d8	a15r	alive	0	1732	NA	NA	NA	64	NA	NA	NA	NA	right upper outer quadrant	sentinel node biopsy alone	NA	NA	nationwide children's hospital	NA	NA	NA	tcga-e2-a15r-f70011	942e79ff-f95b-4d03-a700-778f79c4083a	canonical	NA	positive	NA	NA	NA	NA	positive	lumpectomy	NA	NA	NA	NA	NA	no	21	9	NA	NA	-23570	0	0	NA	NA	no	NA
TCGA-E2-A15S-01A	0f7ab21b-1fd0-45e0-9a47-17c4691eb84f	a15s	alive	0	428	NA	NA	NA	34	left upper outer quadrant	NA	NA	NA	left upper inner quadrant	sentinel lymph node biopsy plus axillary dissection	NA	NA	nationwide children's hospital	NA	NA	NA	tcga-e2-a15s-f19135	e148f43c-c230-4941-9b16-bf0b9d4c9af4	canonical	NA	positive	NA	NA	NA	NA	negative	simple mastectomy	NA	NA	NA	NA	NA	no	21	16	NA	NA	-12671	0	0	NA	NA	no	NA
TCGA-E2-A15T-01A	e68ebfd4-3688-4caa-9e38-7764f9258c30	a15t	alive	0	1563	NA	NA	NA	65	NA	NA	NA	NA	left upper outer quadrant	sentinel node biopsy alone	NA	NA	nationwide children's hospital	NA	NA	NA	tcga-e2-a15t-f70019	686df890-b124-45ee-95db-3848ab3f3b73	canonical	NA	positive	NA	NA	NA	NA	positive	simple mastectomy	NA	NA	NA	NA	NA	no	21	9	NA	NA	-24054	0	0	NA	NA	no	NA
TCGA-E2-A1AZ-01A	89128dba-403f-4a96-bb3b-23ed0d5e2147	a1az	alive	0	2329	NA	NA	NA	63	NA	NA	NA	NA	left upper inner quadrant	sentinel node biopsy alone	NA	NA	nationwide children's hospital	NA	NA	NA	tcga-e2-a1az-f19462	63961b20-f6ae-45fa-b444-3430f85e6cbf	canonical	NA	negative	3 point scale	NA	3 point scale	NA	negative	lumpectomy	NA	NA	NA	NA	NA	no	21	6	NA	NA	-23230	0	0	NA	NA	no	NA
TCGA-E2-A1B0-01A	996bd3f0-d767-4eff-9c82-99fcb5a3006a	a1b0	alive	0	1631	NA	NA	NA	50	NA	NA	NA	NA	left upper outer quadrant	sentinel lymph node biopsy plus axillary dissection	NA	NA	nationwide children's hospital	NA	NA	NA	tcga-e2-a1b0-f19460	14d44caa-26dc-4b41-b2a0-dc4a8a58bed3	canonical	NA	negative	NA	NA	NA	NA	negative	modified radical mastectomy	NA	NA	NA	NA	NA	no	21	7	NA	NA	-18346	0	0	NA	NA	no	NA
TCGA-E2-A1B1-01A	8a0ef221-8070-43fc-9d98-def90abe4871	a1b1	alive	0	2653	NA	NA	NA	45	NA	NA	NA	NA	left upper outer quadrant	sentinel node biopsy alone	NA	NA	nationwide children's hospital	NA	NA	NA	tcga-e2-a1b1-f70009	87d15560-4ae5-45ad-b931-54de2e14c301	canonical	NA	positive	NA	NA	NA	NA	positive	lumpectomy	NA	NA	NA	NA	NA	no	21	9	NA	NA	-16603	0	0	NA	NA	no	NA
TCGA-E2-A1B4-01A	dbb2da92-99dd-400c-bc05-e87d7273656c	a1b4	dead	1004	1004	NA	NA	NA	74	NA	NA	NA	NA	left upper inner quadrant	sentinel node biopsy alone	NA	NA	nationwide children's hospital	NA	NA	NA	tcga-e2-a1b4-f19443	c0578c7e-fcf4-4943-8d39-e0350cdf44d3	canonical	NA	positive	NA	NA	NA	NA	positive	lumpectomy	NA	NA	NA	NA	NA	no	21	8	NA	NA	-27241	0	0	NA	NA	no	NA
TCGA-E2-A1B5-01A	7241b3d4-31ee-4fd2-a4a5-35a9d5f37d6a	a1b5	alive	0	984	NA	NA	NA	46	NA	NA	NA	NA	left	sentinel node biopsy alone	NA	NA	nationwide children's hospital	germline comparison	NA	case matched methylation control	tcga-e2-a1b5-f19393	c39fb1af-80f5-4372-b7a6-02c6e902d4db	canonical - plus	NA	positive	NA	NA	NA	NA	positive	lumpectomy	NA	NA	NA	NA	NA	no	21	8	NA	NA	-17039	0	0	NA	NA	no	NA
TCGA-E2-A1B6-01A	e0b1bcd2-1139-44b9-98b3-67bcf92bcc39	a1b6	alive	0	867	NA	NA	NA	44	NA	NA	NA	NA	left	sentinel node biopsy alone	NA	NA	nationwide children's hospital	NA	NA	NA	tcga-e2-a1b6-f19389	52c7e9e7-e0fb-4221-b4af-7edf9586e0d6	canonical	NA	negative	NA	NA	NA	NA	negative	simple mastectomy	NA	NA	NA	NA	NA	no	21	8	NA	NA	-16370	0	0	NA	NA	no	NA
TCGA-E2-A1BD-01A	0e1d0d46-7a7b-4538-95dd-b9fc20a15aec	a1bd	alive	0	1133	NA	NA	NA	53	NA	NA	NA	NA	right upper outer quadrant	sentinel node biopsy alone	NA	NA	nationwide children's hospital	NA	NA	NA	tcga-e2-a1bd-f70021	c93ab29a-00fc-49ac-89dc-ac44ed0a1f59	canonical	NA	positive	NA	NA	NA	NA	positive	lumpectomy	NA	NA	NA	NA	NA	no	21	9	NA	NA	-19627	0	0	NA	NA	no	NA
TCGA-E2-A1IE-01A	2d0d7ff4-7866-4ae1-9cf1-a3c7f4cbe48d	a1ie	alive	0	2362	NA	NA	NA	61	NA	NA	NA	NA	right	sentinel node biopsy alone	NA	NA	nationwide children's hospital	NA	NA	NA	tcga-e2-a1ie-f70297	2d1b9c9b-b501-4643-91f8-fbf1d4b0a90c	canonical	NA	positive	NA	NA	NA	NA	positive	lumpectomy	NA	NA	NA	NA	NA	no	21	16	NA	NA	-22510	0	0	NA	NA	no	NA
TCGA-E2-A1IF-01A	718db047-9f32-48c4-98c9-515218441bca	a1if	alive	0	1138	NA	NA	NA	74	NA	NA	NA	NA	left upper outer quadrant	sentinel node biopsy alone	NA	NA	nationwide children's hospital	NA	NA	case matched methylation control	tcga-e2-a1if-f19962	ce3cd2d3-5b39-4490-bd37-8ea5028464db	canonical - plus	NA	positive	NA	NA	NA	NA	positive	lumpectomy	NA	NA	NA	NA	NA	no	21	21	NA	NA	-27341	0	0	NA	NA	no	NA
TCGA-E2-A1IG-01A	bc0bc70f-c6cf-4dbc-9dc3-8b7bc5f381a4	a1ig	alive	0	2140	NA	NA	NA	45	NA	NA	NA	NA	right upper inner quadrant	sentinel node biopsy alone	NA	NA	nationwide children's hospital	NA	NA	case matched expression control	tcga-e2-a1ig-f70394	f362de95-e046-4400-8d1c-27c92bca588a	canonical - plus	NA	positive	3 point scale	NA	3 point scale	NA	positive	simple mastectomy	NA	NA	NA	NA	NA	no	21	16	NA	NA	-16757	0	0	NA	NA	no	NA
TCGA-E2-A1IH-01A	ec0155ab-1b14-498d-8fa9-9f63e3ccb990	a1ih	alive	0	1026	NA	NA	NA	80	NA	NA	NA	NA	right upper inner quadrant	sentinel node biopsy alone	NA	NA	nationwide children's hospital	NA	NA	NA	tcga-e2-a1ih-f19960	65e9b5ed-cc0c-41f6-8985-1a9d0ef1712d	canonical	NA	positive	NA	NA	NA	NA	positive	lumpectomy	NA	NA	NA	NA	NA	no	21	21	NA	NA	-29444	0	0	NA	NA	no	NA
TCGA-E2-A1II-01A	0fe1419e-a005-407c-8ae7-15c4c1579539	a1ii	alive	0	1025	NA	NA	NA	51	NA	NA	NA	NA	left	sentinel node biopsy alone	NA	NA	nationwide children's hospital	NA	NA	case matched methylation control	tcga-e2-a1ii-f19954	27975fd4-6ae6-4cf8-b70d-97a5d77f33f1	canonical - plus	NA	negative	NA	NA	NA	NA	positive	lumpectomy	NA	NA	NA	NA	NA	no	21	21	NA	NA	-18788	0	0	NA	NA	no	NA
TCGA-E2-A1IJ-01A	b09643c2-ded5-4346-b3c5-90a48f88a02e	a1ij	alive	0	865	NA	NA	NA	57	NA	NA	NA	NA	right upper outer quadrant	sentinel node biopsy alone	NA	NA	nationwide children's hospital	NA	NA	NA	tcga-e2-a1ij-f19950	410fb9de-fa2f-41b4-9c9a-584e963ea019	canonical	NA	positive	3 point scale	NA	3 point scale	NA	positive	lumpectomy	NA	NA	NA	NA	NA	no	21	21	NA	NA	-20956	0	0	NA	NA	no	NA
TCGA-E2-A1IK-01A	becedbfd-b2aa-4dde-b7f4-29e6f59ec32c	a1ik	alive	0	1800	NA	NA	NA	71	NA	NA	NA	NA	left	sentinel node biopsy alone	NA	NA	nationwide children's hospital	NA	NA	NA	tcga-e2-a1ik-f70395	c706ab33-cd90-495b-ad28-271551db85a8	canonical	NA	positive	NA	NA	NA	NA	positive	lumpectomy	NA	NA	NA	NA	NA	no	21	17	NA	NA	-26052	0	0	NA	NA	no	NA
TCGA-E2-A1IL-01A	b63391a0-73f8-4544-9e94-f6529245ca2a	a1il	alive	0	118	NA	NA	NA	78	NA	NA	NA	NA	left upper outer quadrant	sentinel node biopsy alone	NA	NA	nationwide children's hospital	NA	NA	NA	tcga-e2-a1il-f20276	7e6edbfe-0e8f-4123-97ea-7557145a44c4	canonical	NA	positive	NA	NA	NA	NA	positive	lumpectomy	NA	NA	NA	NA	NA	no	21	3	NA	NA	-28495	0	0	NA	NA	no	NA
TCGA-E2-A1IN-01A	f43d622f-eed5-4933-adc6-ae9ad1e33028	a1in	alive	0	675	NA	NA	NA	60	NA	NA	NA	NA	right	sentinel node biopsy alone	NA	NA	nationwide children's hospital	NA	NA	NA	tcga-e2-a1in-f20323	14834e52-b0e0-43d7-b13b-32a3d0d390e3	canonical	NA	positive	NA	NA	NA	NA	positive	lumpectomy	NA	NA	NA	NA	NA	no	21	4	NA	NA	-22199	0	0	NA	NA	no	NA
TCGA-E2-A1IO-01A	71fc8941-4cfb-47ea-a533-873d38f8c95c	a1io	alive	0	1855	NA	NA	NA	37	NA	NA	NA	NA	right	sentinel node biopsy alone	NA	NA	nationwide children's hospital	NA	NA	case matched methylation control	tcga-e2-a1io-f70391	e33c2350-fcfd-48b6-9444-e29e22bb64dd	canonical - plus	NA	positive	3 point scale	NA	3 point scale	NA	positive	lumpectomy	NA	NA	NA	NA	NA	no	21	16	NA	NA	-13671	0	0	NA	NA	no	NA
TCGA-E2-A1IU-01A	001cef41-ff86-4d3f-a140-a647ac4b10a1	a1iu	alive	0	337	NA	NA	NA	60	NA	NA	NA	NA	right upper outer quadrant	sentinel node biopsy alone	NA	NA	nationwide children's hospital	NA	NA	NA	tcga-e2-a1iu-f19974	24cbf8d6-4b40-4569-a40f-f3c906beea9d	canonical	NA	positive	NA	NA	NA	NA	positive	simple mastectomy	NA	NA	NA	NA	NA	no	21	4	NA	NA	-22279	0	0	NA	NA	no	NA
TCGA-E2-A1L6-01A	2e32f31f-9817-4935-b259-96c59936ee33	a1l6	alive	0	1648	NA	NA	NA	44	NA	NA	NA	NA	left upper outer quadrant	sentinel lymph node biopsy plus axillary dissection	NA	NA	nationwide children's hospital	NA	NA	NA	tcga-e2-a1l6-f20570	78110a92-e50f-46a7-a227-abedc2f39edc	canonical	NA	positive	NA	NA	NA	NA	positive	simple mastectomy	NA	NA	NA	NA	NA	no	21	10	NA	NA	-16403	0	0	NA	NA	no	NA
TCGA-E2-A1L7-01A	791c5768-f0f5-4ab6-86eb-998e5c4b49e3	a1l7	alive	0	1836	NA	NA	NA	40	NA	NA	NA	NA	right upper outer quadrant	axillary lymph node dissection alone	NA	NA	nationwide children's hospital	case matched methylation control	NA	case matched expression control	tcga-e2-a1l7-f70298	0e0a1363-5109-4cb5-b655-fcbcef191361	canonical - plus	NA	negative	NA	NA	NA	NA	negative	modified radical mastectomy	NA	NA	NA	NA	NA	no	21	16	NA	NA	-14854	0	0	NA	NA	no	NA
TCGA-E2-A1L9-01A	5ea18514-51ad-4844-abea-15e82f0b10c9	a1l9	alive	0	598	NA	NA	NA	40	NA	NA	NA	NA	right	sentinel node biopsy alone	NA	NA	nationwide children's hospital	NA	NA	NA	tcga-e2-a1l9-f20597	1d1eb5b9-2c8b-47f3-bbd6-e02a269be683	canonical	NA	positive	3 point scale	NA	3 point scale	NA	positive	lumpectomy	NA	NA	NA	NA	NA	no	21	11	NA	NA	-14868	0	0	NA	NA	no	NA
TCGA-E2-A1LA-01A	ce9e0309-9756-42d2-ae94-d91264a79498	a1la	alive	0	748	NA	NA	NA	59	NA	NA	NA	NA	right upper inner quadrant	sentinel lymph node biopsy plus axillary dissection	NA	NA	nationwide children's hospital	NA	NA	NA	tcga-e2-a1la-f20586	1e00479e-f37f-4bc0-8819-1ee4a5496823	canonical	NA	positive	NA	NA	NA	NA	positive	simple mastectomy	NA	NA	NA	NA	NA	no	21	12	NA	NA	-21773	0	0	NA	NA	no	NA
TCGA-E2-A1LB-01A	fa176764-a76f-44c7-b97a-cd6d21e052be	a1lb	alive	0	2306	NA	NA	NA	41	NA	NA	NA	NA	right upper outer quadrant	axillary lymph node dissection alone	NA	NA	nationwide children's hospital	case matched methylation control	NA	case matched expression control	tcga-e2-a1lb-f70015	f04d0fa3-92dd-4833-8390-dd3333635e69	canonical - plus	NA	negative	NA	NA	NA	NA	negative	lumpectomy	NA	NA	NA	NA	NA	no	21	9	NA	NA	-15283	0	0	NA	NA	no	NA
TCGA-E2-A1LE-01A	7317e605-93ba-49a9-8743-20613b02767a	a1le	dead	879	879	NA	no	NA	71	right lower inner quadrant	NA	NA	NA	right upper inner quadrant	sentinel lymph node biopsy plus axillary dissection	NA	NA	nationwide children's hospital	NA	NA	NA	tcga-e2-a1le-f20657	4ab0b560-c397-4945-a69b-2dc2a6437160	canonical	NA	negative	NA	NA	NA	NA	negative	simple mastectomy	NA	NA	NA	NA	NA	no	21	18	NA	NA	-26239	0	0	NA	NA	no	NA
TCGA-E2-A1LH-01A	d8ecba6a-9fff-4993-a799-9a8d2aea524e	a1lh	alive	0	3247	NA	NA	NA	59	NA	NA	NA	NA	right	sentinel node biopsy alone	NA	NA	nationwide children's hospital	case matched methylation control	NA	case matched expression control	tcga-e2-a1lh-f20649	29497476-76a6-4d7c-9478-fba0801fdfdf	canonical - plus	NA	negative	3 point scale	NA	3 point scale	NA	negative	lumpectomy	NA	NA	NA	NA	NA	no	21	12	NA	NA	-21628	0	0	NA	NA	no	NA
TCGA-E2-A1LI-01A	3558dec7-eae3-4a41-a217-266c6a4535fb	a1li	alive	0	3121	NA	NA	NA	57	NA	NA	NA	NA	left upper outer quadrant	sentinel node biopsy alone	NA	NA	nationwide children's hospital	NA	NA	case matched methylation control	tcga-e2-a1li-f20623	8bae43ac-77bb-4ac6-9756-c0a746b794dc	canonical - plus	NA	negative	3 point scale	NA	3 point scale	NA	negative	lumpectomy	NA	NA	NA	NA	NA	no	21	12	NA	NA	-21064	0	0	NA	NA	no	NA
TCGA-E2-A1LK-01A	1d27253f-b036-44e7-a04d-8da5bbf57419	a1lk	dead	266	266	NA	yes	NA	84	left lower outer quadrant	NA	NA	NA	left upper outer quadrant	axillary lymph node dissection alone	NA	NA	nationwide children's hospital	NA	NA	NA	tcga-e2-a1lk-f20620	84091637-deee-4309-9aae-75a596e9218d	canonical	NA	negative	NA	NA	NA	NA	negative	modified radical mastectomy	NA	NA	NA	NA	NA	no	21	12	NA	200	-30757	0	0	NA	NA	no	NA
TCGA-E2-A1LL-01A	2a84997d-ccee-4f46-bea2-752534f26416	a1ll	alive	0	1309	NA	no	NA	73	NA	NA	NA	NA	left upper outer quadrant	axillary lymph node dissection alone	NA	NA	nationwide children's hospital	NA	NA	NA	tcga-e2-a1ll-f20616	a4e4c69d-7d3f-41e4-af0a-681e4603326e	canonical	NA	negative	NA	NA	NA	NA	negative	simple mastectomy	NA	NA	NA	NA	NA	no	21	17	NA	NA	-27028	0	0	NA	NA	no	NA
TCGA-E2-A1LS-01A	91a2f2af-e4b1-4a0b-ab20-6a36ce63c533	a1ls	alive	0	1604	NA	NA	NA	46	NA	NA	NA	NA	right lower outer quadrant	sentinel node biopsy alone	NA	NA	nationwide children's hospital	case matched methylation control	NA	case matched expression control	tcga-e2-a1ls-f70016	d73a246d-93ce-4e3c-8364-a243efa91c86	canonical - plus	NA	negative	NA	NA	NA	NA	negative	simple mastectomy	NA	NA	NA	NA	NA	no	21	9	NA	NA	-16887	0	0	NA	NA	no	NA
TCGA-E2-A2P6-01A	f83b866b-0b2e-4bba-9367-be6dccf56232	a2p6	alive	0	1051	NA	NA	NA	77	NA	NA	NA	NA	left upper outer quadrant	sentinel node biopsy alone	NA	NA	nationwide children's hospital	NA	NA	NA	tcga-e2-a2p6-f68574	51e462d5-d07f-4e42-a9e8-4171deee1ae1	canonical	negative	positive	NA	NA	NA	modified radical mastectomy	positive	lumpectomy	NA	NA	NA	NA	NA	no	21	26	NA	NA	-28411	0	0	NA	NA	no	NA
TCGA-E2-A3DX-01A	31427699-e27a-4035-8925-6d8d6900d097	a3dx	alive	0	1325	NA	NA	NA	43	NA	NA	NA	NA	right	axillary lymph node dissection alone	NA	NA	nationwide children's hospital	NA	NA	NA	tcga-e2-a3dx-f70017	0009b079-7981-4e93-beda-673a97ff1137	canonical	NA	positive	NA	NA	NA	NA	positive	modified radical mastectomy	NA	NA	NA	NA	NA	no	21	9	NA	NA	-15969	0	0	NA	NA	no	NA
TCGA-E2-A56Z-01A	45c3975c-d333-4237-93f7-e12dc2451c38	a56z	alive	0	252	NA	NA	NA	69	NA	NA	NA	NA	right	sentinel lymph node biopsy plus axillary dissection	NA	NA	nationwide children's hospital	NA	NA	NA	tcga-e2-a56z-f67584	8efc436c-c4be-4adf-8b69-b4055ee66553	canonical	NA	positive	NA	NA	NA	NA	positive	lumpectomy	NA	NA	NA	NA	NA	no	21	6	NA	NA	-25282	0	0	NA	NA	NA	NA
TCGA-E2-A570-01A	cdd8c046-fd97-482a-a11f-2217b321c4d1	a570	alive	0	931	NA	NA	NA	47	NA	NA	NA	NA	right lower inner quadrant	sentinel node biopsy alone	NA	NA	nationwide children's hospital	NA	NA	NA	tcga-e2-a570-f61335	d033e907-a771-48e7-ac23-e1dc385c5cd1	canonical	NA	positive	NA	NA	NA	NA	positive	simple mastectomy	NA	NA	NA	NA	NA	no	21	27	NA	NA	-17456	0	0	NA	NA	NA	NA
TCGA-E2-A573-01A	6429c443-8ac3-407f-bb9c-66420b904bbf	a573	alive	0	1062	NA	NA	NA	48	NA	NA	NA	NA	right upper outer quadrant	sentinel node biopsy alone	NA	NA	nationwide children's hospital	NA	NA	NA	tcga-e2-a573-f61338	e2709df2-6524-4677-b518-338714e12666	canonical	NA	negative	NA	NA	NA	NA	negative	other	NA	NA	NA	NA	NA	no	21	27	NA	NA	-17689	0	0	NA	NA	NA	NA
TCGA-E2-A574-01A	029ce650-5e5a-4100-8596-cd94300e7ef5	a574	alive	0	1179	NA	NA	NA	44	NA	NA	NA	NA	left	sentinel node biopsy alone	NA	NA	nationwide children's hospital	NA	NA	NA	tcga-e2-a574-f70296	f674155c-12d0-46ea-bd0c-3a5ac675c845	canonical	NA	negative	NA	NA	NA	NA	negative	lumpectomy	NA	NA	NA	NA	NA	no	21	9	NA	NA	-16195	0	0	NA	NA	NA	NA
TCGA-E2-A576-01A	f04dca9e-409b-4300-b11d-12243e5d361d	a576	alive	0	1043	NA	NA	NA	69	NA	NA	NA	NA	left upper outer quadrant	sentinel node biopsy alone	NA	NA	nationwide children's hospital	NA	NA	NA	tcga-e2-a576-f67575	6fd3acad-834b-4de2-bd60-a40c43793beb	canonical	NA	positive	NA	NA	NA	NA	positive	lumpectomy	NA	NA	NA	NA	NA	yes	21	6	NA	NA	-25350	0	0	NA	NA	NA	NA
TCGA-E2-A9RU-01A	6f18f96e-c0c9-4cc4-9fb2-cba8949d5402	a9ru	alive	0	538	NA	NA	NA	90	NA	NA	NA	NA	right lower outer quadrant	axillary lymph node dissection alone	NA	NA	nationwide children's hospital	NA	NA	NA	tcga-e2-a9ru-f70313	bf7d4093-2a5d-4a9b-a257-7303fd2dd6e5	canonical	NA	positive	NA	NA	NA	NA	negative	lumpectomy	NA	NA	NA	NA	NA	yes	21	9	NA	NA	-32873	0	0	NA	NA	NA	NA
TCGA-E9-A1N3-01A	03c143e0-d8a1-4d60-a4a3-df0501fc6b6e	a1n3	alive	0	1059	NA	NA	NA	70	NA	NA	NA	NA	right upper inner quadrant	axillary lymph node dissection alone	NA	NA	nationwide children's hospital	NA	NA	NA	tcga-e9-a1n3-f62627	51209566-a8d1-4ec8-8974-323532a10aab	canonical	NA	NA	NA	NA	NA	NA	NA	modified radical mastectomy	NA	NA	NA	NA	NA	no	21	22	NA	NA	-25714	0	0	NA	NA	no	NA
TCGA-E9-A1N4-01A	69a68fbc-e43d-4652-85ee-693211bded47	a1n4	alive	0	1000	NA	NA	NA	41	NA	NA	NA	NA	left upper inner quadrant	axillary lymph node dissection alone	NA	NA	nationwide children's hospital	case matched methylation control	NA	case matched expression control	tcga-e9-a1n4-f39767	7a3c4560-6d33-44a1-bc57-e835dfec288c	canonical - plus	NA	positive	NA	NA	NA	NA	positive	NA	NA	NA	NA	NA	NA	no	21	1	NA	NA	-15055	0	0	NA	NA	no	NA
TCGA-E9-A1N5-01A	f954de05-1b44-4087-8933-6cc72d81028d	a1n5	alive	0	1120	NA	NA	NA	45	NA	NA	NA	NA	left upper outer quadrant	axillary lymph node dissection alone	NA	NA	nationwide children's hospital	case matched methylation control	NA	case matched expression control	tcga-e9-a1n5-f39765	b4847252-8efc-42e5-a862-992780803ad3	canonical - plus	NA	positive	NA	NA	NA	NA	positive	NA	NA	NA	NA	NA	NA	no	21	1	NA	NA	-16736	0	0	NA	NA	no	NA
TCGA-E9-A1N6-01A	955d4263-61f7-42e8-8a6e-772a0d6c209d	a1n6	dead	678	678	NA	NA	NA	52	NA	NA	NA	NA	left upper outer quadrant	axillary lymph node dissection alone	NA	NA	nationwide children's hospital	case matched methylation control	NA	case matched expression control	tcga-e9-a1n6-f63536	d6c11d26-4fa8-426c-b4fc-9a280f1ed8d3	canonical - plus	NA	positive	NA	NA	NA	NA	positive	NA	NA	NA	NA	NA	NA	no	21	12	NA	NA	-19327	0	0	NA	NA	no	NA
TCGA-E9-A1N8-01A	ac075bc0-1b59-4557-beea-541694faee03	a1n8	alive	0	1039	NA	NA	NA	48	NA	NA	NA	NA	right upper outer quadrant	axillary lymph node dissection alone	NA	NA	nationwide children's hospital	NA	NA	case matched methylation control	tcga-e9-a1n8-f53518	f4d07d12-e2e7-45aa-a24f-d15d9a955df7	canonical - plus	NA	negative	NA	NA	NA	NA	NA	NA	NA	NA	NA	NA	NA	no	21	12	NA	NA	-17652	0	0	NA	NA	no	NA
TCGA-E9-A1N9-01A	994ca1f5-ad10-44ec-aa21-71fc2940653b	a1n9	alive	0	1101	NA	NA	NA	58	NA	NA	NA	NA	right lower outer quadrant	axillary lymph node dissection alone	NA	NA	nationwide children's hospital	case matched methylation control	NA	case matched expression control	tcga-e9-a1n9-f58373	07eb2a9c-a934-44a1-9fd2-c1580160c002	canonical - plus	NA	negative	NA	NA	NA	NA	positive	NA	NA	NA	NA	NA	NA	yes	21	8	NA	NA	-21228	0	0	NA	NA	no	NA
TCGA-E9-A1NA-01A	af577366-0258-49e7-b6af-e70056c081a4	a1na	alive	0	1112	NA	NA	NA	58	NA	NA	NA	NA	left lower outer quadrant	axillary lymph node dissection alone	NA	NA	nationwide children's hospital	case matched methylation control	NA	case matched expression control	tcga-e9-a1na-f39782	7d959c11-6f61-40a8-b8e3-a80f62dfe74a	canonical - plus	NA	positive	NA	NA	NA	NA	positive	NA	NA	NA	NA	NA	NA	yes	21	1	NA	NA	-21397	0	0	NA	NA	no	NA
TCGA-E9-A1NC-01A	e74aea7c-ca14-49df-b5cf-dacb839ac27a	a1nc	alive	0	1203	NA	NA	NA	61	NA	NA	NA	NA	right upper inner quadrant	axillary lymph node dissection alone	NA	NA	nationwide children's hospital	NA	NA	NA	tcga-e9-a1nc-f40639	9d94e73f-c799-4d60-8226-7deebda60156	canonical	NA	negative	NA	NA	NA	NA	positive	NA	NA	NA	NA	NA	NA	yes	21	26	NA	NA	-22355	0	0	NA	NA	no	NA
TCGA-E9-A1ND-01A	f06f09f3-8133-4a92-ac86-fbe64295e0d8	a1nd	alive	0	1266	NA	NA	NA	75	NA	NA	NA	NA	left upper outer quadrant	axillary lymph node dissection alone	NA	NA	nationwide children's hospital	case matched methylation control	NA	case matched expression control	tcga-e9-a1nd-f62586	20d9d392-e622-4e6b-9d2d-1d2616a9f585	canonical - plus	NA	negative	NA	NA	NA	NA	negative	NA	NA	NA	NA	NA	NA	yes	21	21	NA	NA	-27400	0	0	NA	NA	no	NA
TCGA-E9-A1NE-01A	3d676bba-154b-4d22-ab59-d4d4da051b94	a1ne	alive	0	1088	NA	NA	NA	28	NA	NA	NA	NA	right lower outer quadrant	axillary lymph node dissection alone	NA	NA	nationwide children's hospital	NA	NA	case matched methylation control	tcga-e9-a1ne-f39781	8a04abc1-6244-42ed-b3a7-4bf655854f46	canonical - plus	NA	positive	NA	NA	NA	NA	positive	NA	NA	NA	NA	NA	NA	yes	21	1	NA	NA	-10564	0	0	NA	NA	no	NA
TCGA-E9-A1NF-01A	a8b1f6e7-2bcf-460d-b1c6-1792a9801119	a1nf	dead	1072	1072	NA	no	NA	60	NA	NA	NA	NA	right upper outer quadrant	axillary lymph node dissection alone	NA	NA	nationwide children's hospital	case matched methylation control	NA	case matched expression control	tcga-e9-a1nf-f39778	bf1adce9-14bb-4f7d-9b8d-dc8a5e3d824f	canonical - plus	NA	positive	NA	NA	NA	NA	positive	NA	NA	NA	NA	NA	NA	yes	21	1	NA	NA	-21981	0	0	NA	NA	no	NA
TCGA-E9-A1NG-01A	659b0170-e914-45ff-aa55-fcb8d3dc7b8a	a1ng	dead	786	786	NA	NA	NA	62	NA	NA	NA	NA	right upper outer quadrant	axillary lymph node dissection alone	NA	NA	nationwide children's hospital	case matched methylation control	NA	case matched expression control	tcga-e9-a1ng-f39774	b3eeee00-5b8e-436f-80fe-7412c969bf0c	canonical - plus	NA	positive	NA	NA	NA	NA	positive	NA	NA	NA	NA	NA	NA	yes	21	1	NA	NA	-22896	0	0	NA	NA	no	NA
TCGA-E9-A1NH-01A	b2aac45b-2073-4c7a-adb9-769a4fdcc111	a1nh	alive	0	576	NA	NA	NA	71	NA	NA	NA	NA	left upper inner quadrant	axillary lymph node dissection alone	NA	NA	nationwide children's hospital	NA	NA	case matched methylation control	tcga-e9-a1nh-f35049	6610dd91-ca89-400b-83f5-1b08aeadaf1a	canonical - plus	NA	positive	NA	NA	NA	NA	positive	modified radical mastectomy	NA	NA	NA	NA	NA	yes	21	14	NA	NA	-26221	0	0	NA	NA	no	NA
TCGA-E9-A1NI-01A	c65b835a-2d38-4250-a173-0780d2c2cf58	a1ni	alive	0	300	NA	NA	NA	51	NA	NA	NA	NA	left upper outer quadrant	axillary lymph node dissection alone	NA	NA	nationwide children's hospital	NA	NA	NA	tcga-e9-a1ni-f52056	4876bc0d-f943-41b2-8ee0-faf3d05a3fce	canonical	NA	positive	NA	NA	NA	NA	positive	NA	NA	NA	NA	NA	NA	yes	21	27	NA	NA	-18985	0	0	NA	NA	no	NA
TCGA-E9-A1QZ-01A	b6b932ce-6856-4d94-9e6c-16dfbe51906f	a1qz	alive	0	755	NA	NA	NA	61	NA	NA	NA	NA	left lower inner quadrant	axillary lymph node dissection alone	NA	NA	nationwide children's hospital	NA	NA	NA	tcga-e9-a1qz-f66270	e97cfb3d-31e0-4aed-82c6-c775cf5282fe	canonical	NA	NA	NA	NA	NA	NA	NA	NA	NA	NA	NA	NA	NA	NA	21	7	NA	NA	-22397	0	0	NA	NA	no	NA
TCGA-E9-A1R0-01A	f2da1d3f-f226-4c99-a97e-9b26f67d7a5d	a1r0	alive	0	860	NA	NA	NA	58	NA	NA	NA	NA	left upper outer quadrant	axillary lymph node dissection alone	NA	NA	nationwide children's hospital	NA	NA	NA	tcga-e9-a1r0-f41214	ad367cf1-62c6-4796-ab47-569755fe6836	canonical	NA	NA	NA	NA	NA	NA	NA	NA	NA	NA	NA	NA	NA	NA	21	13	NA	NA	-21394	0	0	NA	NA	no	NA
TCGA-E9-A1R2-01A	8631969d-4ac6-4fe1-9db3-d47db604494a	a1r2	alive	0	1063	NA	NA	NA	51	NA	NA	NA	NA	left upper outer quadrant	axillary lymph node dissection alone	NA	NA	nationwide children's hospital	NA	NA	NA	tcga-e9-a1r2-f57941	62efcdc5-4570-4b6f-a920-8fe3f82173cf	canonical	NA	positive	NA	NA	NA	NA	negative	lumpectomy	NA	NA	NA	NA	NA	no	21	31	NA	NA	-18936	0	0	NA	NA	no	NA
TCGA-E9-A1R3-01A	4922cddc-575c-4b8a-8245-ce5f6876760c	a1r3	alive	0	78	NA	NA	NA	70	NA	NA	NA	NA	right upper outer quadrant	axillary lymph node dissection alone	NA	NA	nationwide children's hospital	NA	NA	NA	tcga-e9-a1r3-f48697	cc3c4599-3b2a-41f5-b233-ddcd72dfc819	canonical	NA	NA	NA	NA	NA	NA	NA	modified radical mastectomy	NA	NA	NA	NA	NA	no	21	19	NA	NA	-25693	0	0	NA	NA	no	NA
TCGA-E9-A1R4-01A	b7a4df9a-4e25-4550-9c10-338ca1921c2f	a1r4	alive	0	186	NA	NA	NA	66	NA	NA	NA	NA	left upper outer quadrant	axillary lymph node dissection alone	NA	NA	nationwide children's hospital	NA	NA	NA	tcga-e9-a1r4-f48699	f48bbdba-2e52-4977-b5c5-4644216dd354	canonical	NA	NA	NA	NA	NA	NA	NA	NA	NA	NA	NA	NA	NA	no	21	19	NA	NA	-24181	0	0	NA	NA	no	NA
TCGA-E9-A1R5-01A	23c21dea-3713-408f-ba56-f7c586e9f206	a1r5	alive	0	92	NA	NA	NA	63	NA	NA	NA	NA	right upper outer quadrant	axillary lymph node dissection alone	NA	NA	nationwide children's hospital	NA	NA	NA	tcga-e9-a1r5-f48700	05a3a194-c053-42e5-bc72-38c2c5bfdd8d	canonical	NA	NA	NA	NA	NA	NA	NA	lumpectomy	NA	NA	NA	NA	NA	no	21	19	NA	NA	-23116	0	0	NA	NA	no	NA
TCGA-E9-A1R6-01A	4842bac3-abaa-4900-871f-f2c3ba6457f5	a1r6	alive	0	339	NA	NA	NA	63	NA	NA	NA	NA	right upper outer quadrant	axillary lymph node dissection alone	NA	NA	nationwide children's hospital	NA	NA	NA	tcga-e9-a1r6-f39520	60a76a6c-e151-40d3-8d86-79f68c50f4e4	canonical	NA	NA	NA	NA	NA	NA	NA	lumpectomy	NA	NA	NA	NA	NA	no	21	24	NA	NA	-23347	0	0	NA	NA	no	NA
TCGA-E9-A1R7-01A	2680da86-c977-4611-b75f-df015283c023	a1r7	alive	0	1467	NA	NA	NA	64	NA	NA	NA	NA	right upper outer quadrant	axillary lymph node dissection alone	NA	NA	nationwide children's hospital	case matched methylation control	NA	case matched expression control	tcga-e9-a1r7-f71424	aa507418-ebde-4faf-95fb-60332fe04d0e	canonical - plus	NA	NA	NA	NA	NA	NA	NA	lumpectomy	NA	NA	NA	NA	NA	no	21	25	NA	NA	-23397	0	0	NA	NA	no	NA
TCGA-E9-A1RA-01A	4b4e4ea8-6eb9-49ad-b880-c5065fe6517f	a1ra	alive	0	1369	NA	NA	NA	48	NA	NA	NA	NA	left upper outer quadrant	axillary lymph node dissection alone	NA	NA	nationwide children's hospital	NA	NA	NA	tcga-e9-a1ra-f68493	b963b3a4-e4b3-449d-a222-a537a95f05e9	canonical	NA	NA	NA	NA	NA	NA	NA	NA	NA	NA	NA	NA	NA	no	21	20	NA	NA	-17699	0	0	NA	NA	no	NA
TCGA-E9-A1RB-01A	94b95984-b2fb-4e42-8887-45e7086c3179	a1rb	dead	976	976	NA	NA	NA	40	NA	NA	NA	NA	left upper inner quadrant	axillary lymph node dissection alone	NA	NA	nationwide children's hospital	case matched methylation control	NA	case matched expression control	tcga-e9-a1rb-f39530	eee00a97-63ce-4a0a-a552-0f2f2d98ccc8	canonical - plus	NA	NA	NA	NA	NA	NA	NA	modified radical mastectomy	NA	NA	NA	NA	NA	no	21	24	NA	NA	-14755	0	0	NA	NA	no	NA
TCGA-E9-A1RC-01A	5cdae21d-eee5-478f-932a-0f51fcf5f031	a1rc	alive	0	1224	NA	NA	NA	56	NA	NA	NA	NA	right upper outer quadrant	axillary lymph node dissection alone	NA	NA	nationwide children's hospital	case matched methylation control	NA	case matched expression control	tcga-e9-a1rc-f48701	0590580d-9303-4488-aa52-6c6fa55009ef	canonical - plus	NA	NA	NA	NA	NA	NA	NA	modified radical mastectomy	NA	NA	NA	NA	NA	no	21	19	NA	NA	-20795	0	0	NA	NA	no	NA
TCGA-E9-A1RD-01A	5fe3c51f-65e2-4da6-8924-a6fae17c022d	a1rd	alive	0	34	NA	NA	NA	67	NA	NA	NA	NA	right lower inner quadrant	axillary lymph node dissection alone	NA	NA	nationwide children's hospital	case matched methylation control	NA	case matched expression control	tcga-e9-a1rd-f48702	8873b70a-8c47-4f12-bc51-d40e6bea4bee	canonical - plus	NA	NA	NA	NA	NA	NA	NA	modified radical mastectomy	NA	NA	NA	NA	NA	no	21	19	NA	NA	-24719	0	0	NA	NA	no	NA
TCGA-E9-A1RE-01A	24046547-d038-4616-b190-52ac93f4965f	a1re	alive	0	1419	NA	NA	NA	74	NA	NA	NA	NA	left upper outer quadrant	axillary lymph node dissection alone	NA	NA	nationwide children's hospital	NA	NA	NA	tcga-e9-a1re-f68732	4c8d48a2-1c70-473f-8aed-c5d3c3385e26	canonical	NA	NA	NA	NA	NA	NA	NA	modified radical mastectomy	NA	NA	NA	NA	NA	no	21	12	NA	NA	-27392	0	0	NA	NA	no	NA
TCGA-E9-A1RF-01A	c694615c-b1c6-499c-8058-995633ebf948	a1rf	alive	0	200	NA	NA	NA	68	NA	NA	NA	NA	left upper outer quadrant	axillary lymph node dissection alone	NA	NA	nationwide children's hospital	case matched methylation control	NA	case matched expression control	tcga-e9-a1rf-f48703	35166afc-aac8-4f95-931d-11660e40ddcf	canonical - plus	NA	NA	NA	NA	NA	NA	NA	modified radical mastectomy	NA	NA	NA	NA	NA	no	21	19	NA	NA	-25119	0	0	NA	NA	no	NA
TCGA-E9-A1RG-01A	8744733a-7b46-43aa-bdef-64876816adbb	a1rg	alive	0	647	NA	NA	NA	62	NA	NA	NA	NA	right upper outer quadrant	axillary lymph node dissection alone	NA	NA	nationwide children's hospital	NA	NA	NA	tcga-e9-a1rg-f39534	8af68d77-e97c-4ea0-9609-fe1bc59c0186	canonical	NA	NA	NA	NA	NA	NA	NA	lumpectomy	NA	NA	NA	NA	NA	no	21	24	NA	NA	-22788	0	0	NA	NA	no	NA
TCGA-E9-A1RH-01A	408cb583-6dc3-4698-8bd2-e284042bd5ef	a1rh	alive	0	1417	NA	NA	NA	63	NA	NA	NA	NA	right lower outer quadrant	axillary lymph node dissection alone	NA	NA	nationwide children's hospital	case matched methylation control	NA	case matched expression control	tcga-e9-a1rh-f70141	02098c42-1fa6-4f5d-a72c-06e338b58c37	canonical - plus	NA	NA	NA	NA	NA	NA	NA	lumpectomy	NA	NA	NA	NA	NA	no	21	28	NA	NA	-23224	0	0	NA	NA	no	NA
TCGA-E9-A1RI-01A	dd3bfb26-b534-4917-9c4d-9fe7b6477762	a1ri	alive	0	1449	NA	NA	NA	43	NA	NA	NA	NA	left upper outer quadrant	axillary lymph node dissection alone	NA	NA	nationwide children's hospital	case matched methylation control	NA	case matched expression control	tcga-e9-a1ri-f70144	a958bb89-b31b-4120-984e-f4d5e8beadeb	canonical - plus	NA	NA	NA	NA	NA	NA	NA	modified radical mastectomy	NA	NA	NA	NA	NA	no	21	28	NA	NA	-15942	0	0	NA	NA	no	NA
TCGA-E9-A226-01A	dd67408e-46ba-4573-9415-d4814e9f84de	a226	dead	1048	1048	NA	NA	NA	45	NA	NA	NA	NA	left lower inner quadrant	axillary lymph node dissection alone	NA	NA	nationwide children's hospital	NA	NA	NA	tcga-e9-a226-f70682	efb0aaea-6db2-48ed-ab3f-020003e15d87	canonical	NA	NA	NA	NA	NA	NA	NA	modified radical mastectomy	NA	NA	NA	NA	NA	no	21	2	NA	NA	-16511	0	0	NA	NA	no	NA
TCGA-E9-A227-01A	89a8da07-4487-47c6-8d3c-442a87e4f632	a227	alive	0	975	NA	NA	NA	42	NA	NA	NA	NA	left upper outer quadrant	sentinel lymph node biopsy plus axillary dissection	NA	NA	nationwide children's hospital	NA	NA	NA	tcga-e9-a227-f58571	21bbe5d6-57a3-4d50-927b-d6c087dcdaaa	canonical	negative	positive	NA	4+	NA	other	positive	lumpectomy	re-excision of original lumpectomy site	NA	NA	NA	NA	no	21	29	NA	NA	-15602	0	0	NA	NA	no	NA
TCGA-E9-A228-01A	b95eef8a-205f-4cf8-9d3c-ae51d406e1e0	a228	alive	0	1285	NA	NA	NA	58	NA	NA	NA	NA	right lower inner quadrant	axillary lymph node dissection alone	NA	NA	nationwide children's hospital	NA	NA	NA	tcga-e9-a228-f65804	9b040232-d621-4b8b-9e8a-b5499d08a9b4	canonical	NA	NA	NA	NA	NA	NA	NA	NA	NA	NA	NA	NA	NA	NA	21	30	NA	NA	-21294	0	0	NA	NA	no	NA
TCGA-E9-A229-01A	cea9d8f9-e18c-4947-a461-5f712e3c1e6d	a229	alive	0	1148	NA	NA	NA	37	NA	NA	NA	NA	right lower inner quadrant	axillary lymph node dissection alone	NA	NA	nationwide children's hospital	NA	NA	NA	tcga-e9-a229-f65803	f2689d1c-f153-4432-93f5-54d768688bb2	canonical	NA	NA	NA	NA	NA	NA	NA	NA	NA	NA	NA	NA	NA	NA	21	30	NA	NA	-13817	0	0	NA	NA	no	NA
TCGA-E9-A22A-01A	4aacbc42-5ac5-4339-b9fa-c6e812084837	a22a	alive	0	1189	NA	NA	NA	74	NA	NA	NA	NA	right lower outer quadrant	axillary lymph node dissection alone	NA	NA	nationwide children's hospital	NA	NA	NA	tcga-e9-a22a-f39785	0a926351-9b94-4d55-9d38-4eb8cbcbb2d3	canonical	NA	positive	NA	NA	NA	NA	negative	NA	NA	NA	NA	NA	NA	yes	21	1	NA	NA	-27288	0	0	NA	NA	no	NA
TCGA-E9-A22B-01A	b956df1b-bc77-4bdb-a5bd-5dda7b4c8da7	a22b	alive	0	1167	NA	NA	NA	71	NA	NA	NA	NA	right upper outer quadrant	axillary lymph node dissection alone	NA	NA	nationwide children's hospital	NA	NA	NA	tcga-e9-a22b-f64425	6867212e-a944-4228-844e-00d426464e1f	canonical	NA	positive	NA	NA	NA	NA	negative	NA	NA	NA	NA	NA	NA	yes	21	2	NA	NA	-26278	0	0	NA	NA	no	NA
TCGA-E9-A22D-01A	cf0a3f38-5850-44e1-8574-808bd37d84a3	a22d	alive	0	1248	NA	NA	NA	38	NA	NA	NA	NA	right upper outer quadrant	axillary lymph node dissection alone	NA	NA	nationwide children's hospital	NA	NA	NA	tcga-e9-a22d-f39787	708bfbe6-3708-4a7e-a6ba-1afc6260f3ec	canonical	NA	positive	NA	NA	NA	NA	positive	modified radical mastectomy	NA	NA	NA	NA	NA	yes	21	1	NA	NA	-14115	0	0	NA	NA	NA	NA
TCGA-E9-A22E-01A	64d4dfae-8d91-464b-adc3-80ba7caf54ae	a22e	alive	0	1269	NA	NA	NA	56	NA	NA	NA	NA	right upper inner quadrant	axillary lymph node dissection alone	NA	NA	nationwide children's hospital	NA	NA	NA	tcga-e9-a22e-f63565	0d065b9c-234c-4a64-8bdb-604298451d32	canonical	NA	positive	NA	NA	NA	NA	positive	NA	NA	NA	NA	NA	NA	yes	21	13	NA	NA	-20574	0	0	NA	NA	no	NA
TCGA-E9-A22G-01A	56033839-35d5-4d72-8b8c-400cb345263d	a22g	alive	0	1239	NA	NA	NA	47	NA	NA	NA	NA	left upper outer quadrant	axillary lymph node dissection alone	NA	NA	nationwide children's hospital	NA	NA	NA	tcga-e9-a22g-f62594	b265de44-b99c-489d-bd86-d6ae6272402e	canonical	NA	negative	NA	NA	NA	NA	negative	NA	NA	NA	NA	NA	NA	yes	21	21	NA	NA	-17300	0	0	NA	NA	no	NA
TCGA-E9-A22H-01A	161917b8-88ad-407b-ade6-d6b98478b359	a22h	alive	0	1232	NA	NA	NA	42	NA	NA	NA	NA	left upper outer quadrant	axillary lymph node dissection alone	NA	NA	nationwide children's hospital	NA	NA	NA	tcga-e9-a22h-f63224	7bf83619-d8be-48d5-a1f5-a812d36024b4	canonical	NA	positive	NA	NA	NA	NA	positive	modified radical mastectomy	NA	NA	NA	NA	NA	yes	21	4	NA	NA	-15504	0	0	NA	NA	no	NA
TCGA-E9-A243-01A	d4a1ecdc-399c-4f82-aa7a-68a0c82ded3f	a243	alive	0	612	NA	yes	NA	52	NA	NA	NA	NA	right upper inner quadrant	axillary lymph node dissection alone	NA	NA	nationwide children's hospital	NA	NA	NA	tcga-e9-a243-f56656	92cede74-3dbc-4157-911c-633ba5edb140	canonical	NA	NA	NA	NA	NA	NA	NA	lumpectomy	NA	NA	NA	NA	NA	no	21	18	NA	305	-19035	0	0	NA	NA	no	NA
TCGA-E9-A244-01A	a4c59287-1ad5-46a5-8040-e591e6ce064f	a244	alive	0	21	NA	NA	NA	54	NA	NA	NA	NA	left upper outer quadrant	axillary lymph node dissection alone	NA	NA	nationwide children's hospital	NA	NA	NA	tcga-e9-a244-f31164	39f4e7e2-641b-4d72-8e4c-8066aad6a679	canonical	NA	NA	NA	NA	NA	NA	NA	lumpectomy	NA	NA	NA	NA	NA	no	21	24	NA	NA	-19778	0	0	NA	NA	no	NA
TCGA-E9-A245-01A	8218119a-f68b-4ea7-9ee4-5e2edc2ae342	a245	dead	0	0	NA	NA	NA	47	NA	NA	NA	NA	left upper outer quadrant	axillary lymph node dissection alone	NA	NA	nationwide children's hospital	NA	NA	NA	tcga-e9-a245-f31169	74ac779b-f5f6-466e-8318-6c6459c1609d	canonical	NA	NA	NA	NA	NA	NA	NA	lumpectomy	NA	NA	NA	NA	NA	no	21	24	NA	NA	-17363	0	0	NA	NA	no	NA
TCGA-E9-A247-01A	636b0a90-c8c2-4ad6-a77d-6cd428a826d1	a247	alive	0	1186	NA	NA	NA	59	NA	NA	NA	NA	left upper inner quadrant	axillary lymph node dissection alone	NA	NA	nationwide children's hospital	NA	NA	NA	tcga-e9-a247-f61874	8455b922-8fe0-4fb7-9dfb-3798fa5b1cb0	canonical	NA	NA	NA	NA	NA	NA	NA	NA	NA	NA	NA	NA	NA	NA	21	23	NA	NA	-21562	0	0	NA	NA	no	NA
TCGA-E9-A248-01A	539bbbed-43fb-4fef-9c67-6406f58b186a	a248	alive	0	59	NA	NA	NA	51	NA	NA	NA	NA	right upper outer quadrant	axillary lymph node dissection alone	NA	NA	nationwide children's hospital	NA	NA	NA	tcga-e9-a248-f31211	a4604d3e-8204-4714-8fd3-27cd2cd423d1	canonical	NA	NA	NA	NA	NA	NA	NA	lumpectomy	NA	NA	NA	NA	NA	no	21	25	NA	NA	-18684	0	0	NA	NA	no	NA
TCGA-E9-A249-01A	fb3607eb-858e-4ecd-8477-95140658c6d2	a249	alive	0	217	NA	NA	NA	45	NA	NA	NA	NA	left upper outer quadrant	axillary lymph node dissection alone	NA	NA	nationwide children's hospital	NA	NA	NA	tcga-e9-a249-f49108	7e07dc42-0f43-488d-9ed8-eba590b0b5fc	canonical	NA	NA	NA	NA	NA	NA	NA	lumpectomy	NA	NA	NA	NA	NA	no	21	25	NA	NA	-16689	0	0	NA	NA	no	NA
TCGA-E9-A24A-01A	9f3cc92b-fa22-478e-a2e4-6b4c8afb93d6	a24a	alive	0	747	NA	NA	NA	69	NA	NA	NA	NA	right upper outer quadrant	axillary lymph node dissection alone	NA	NA	nationwide children's hospital	NA	NA	NA	tcga-e9-a24a-f39541	ce71b1a0-db97-48a0-913f-05cd15eed1c9	canonical	NA	NA	NA	NA	NA	NA	NA	NA	NA	NA	NA	NA	NA	no	21	24	NA	NA	-25370	0	0	NA	NA	no	NA
TCGA-E9-A295-01A	fec0da58-1047-44d2-b6d1-c18cceed43dc	a295	alive	0	375	NA	NA	NA	71	NA	NA	NA	NA	right lower outer quadrant	axillary lymph node dissection alone	NA	NA	nationwide children's hospital	NA	NA	NA	tcga-e9-a295-f35355	3dda0b38-4114-4bcd-8eb4-4d82877cc1fc	canonical	NA	positive	NA	NA	NA	NA	positive	modified radical mastectomy	NA	NA	NA	NA	NA	yes	21	25	NA	NA	-25957	0	0	NA	NA	NA	NA
TCGA-E9-A2JS-01A	4a831893-f4ca-4357-a756-b5e954e35dd7	a2js	dead	904	904	NA	no	NA	72	NA	NA	NA	NA	left upper outer quadrant	axillary lymph node dissection alone	NA	NA	nationwide children's hospital	NA	NA	NA	tcga-e9-a2js-f40293	2f028700-8717-47ee-b60e-f0d73a04c1b2	canonical	NA	NA	NA	NA	NA	NA	NA	lumpectomy	NA	NA	NA	NA	NA	no	21	15	NA	NA	-26407	0	0	NA	NA	NA	NA
TCGA-E9-A2JT-01A	b35fbe19-0e6d-427e-b9be-ee3527b5fca6	a2jt	alive	0	288	NA	NA	NA	63	NA	NA	NA	NA	left upper outer quadrant	axillary lymph node dissection alone	NA	NA	nationwide children's hospital	NA	NA	NA	tcga-e9-a2jt-f40292	1b8bfe3c-efd6-44ec-83e7-d91ca4678c10	canonical	NA	NA	NA	NA	NA	NA	NA	lumpectomy	NA	NA	NA	NA	NA	no	21	15	NA	NA	-23318	0	0	NA	NA	NA	NA
TCGA-E9-A3HO-01A	807b62ed-d3f7-4211-83be-754386ff2c96	a3ho	alive	0	1158	NA	NA	NA	49	NA	NA	NA	NA	left upper outer quadrant	axillary lymph node dissection alone	NA	NA	nationwide children's hospital	NA	NA	NA	tcga-e9-a3ho-f61875	a4391dde-1085-446a-9a5d-93492906ad7d	canonical	NA	NA	NA	NA	NA	NA	NA	modified radical mastectomy	NA	NA	NA	NA	NA	no	21	9	NA	NA	-18046	0	0	NA	NA	no	NA
TCGA-E9-A3Q9-01A	e36e985d-2c44-4e14-854a-7dbca4bb0304	a3q9	alive	0	1001	NA	NA	NA	78	NA	NA	NA	NA	right lower inner quadrant	axillary lymph node dissection alone	NA	NA	nationwide children's hospital	NA	NA	NA	tcga-e9-a3q9-f59741	0902fc35-0aaf-4110-9f64-887922b8b914	canonical	NA	positive	NA	NA	NA	NA	positive	NA	NA	NA	NA	NA	NA	yes	21	20	NA	NA	-28715	0	0	NA	NA	no	NA
TCGA-E9-A3QA-01A	f3cb557d-23e4-4fd1-81ca-db1a3f56d56e	a3qa	alive	0	918	NA	NA	NA	33	NA	NA	NA	NA	left lower inner quadrant	axillary lymph node dissection alone	NA	NA	nationwide children's hospital	NA	NA	NA	tcga-e9-a3qa-f66100	32054674-b4a7-45c1-af24-7707709ad516	canonical	NA	NA	NA	NA	NA	NA	NA	NA	NA	NA	NA	NA	NA	NA	21	2	NA	NA	-12142	0	0	NA	NA	no	NA
TCGA-E9-A3X8-01A	95873e61-afdb-496c-9f77-3f9beb008cda	a3x8	alive	0	926	NA	NA	NA	48	NA	NA	NA	NA	left upper outer quadrant	axillary lymph node dissection alone	NA	NA	nationwide children's hospital	NA	NA	NA	tcga-e9-a3x8-f59742	21fb9bf8-1169-4200-8092-32fbe1250bc1	canonical	NA	positive	NA	NA	NA	NA	positive	modified radical mastectomy	NA	NA	NA	NA	NA	yes	21	20	NA	NA	-17588	0	0	NA	NA	no	NA
TCGA-E9-A54X-01A	3dbc8d60-3a97-47b2-91d0-c18fb46b4365	a54x	alive	0	727	NA	NA	NA	85	left upper outer quadrant	NA	NA	NA	left	axillary lymph node dissection alone	NA	NA	nationwide children's hospital	NA	NA	NA	tcga-e9-a54x-f66449	af2ffffe-faf6-48ec-893a-15c569e3387a	canonical	NA	positive	NA	3+	NA	NA	positive	lumpectomy	NA	NA	NA	NA	NA	no	21	15	NA	NA	-31173	0	0	NA	NA	NA	NA
TCGA-E9-A54Y-01A	182c4bdf-2c58-4303-b034-459da86b9d90	a54y	alive	0	725	NA	NA	NA	63	NA	NA	NA	NA	right	axillary lymph node dissection alone	NA	NA	nationwide children's hospital	NA	NA	NA	tcga-e9-a54y-f66450	70266a12-6442-418f-be85-e9c3979f2cab	canonical	NA	positive	NA	3+	NA	NA	positive	modified radical mastectomy	NA	NA	NA	NA	NA	no	21	15	NA	NA	-23057	0	0	NA	NA	NA	NA
TCGA-E9-A5FK-01A	b304302a-f2b9-4cd7-ab14-c21edf7778ea	a5fk	alive	0	812	NA	NA	NA	60	NA	NA	NA	NA	right upper outer quadrant	axillary lymph node dissection alone	NA	NA	nationwide children's hospital	NA	NA	NA	tcga-e9-a5fk-f70209	e5ba687c-99e5-4d48-bad2-53a5eff74bd1	canonical	NA	positive	3 point scale	3+	3 point scale	NA	positive	modified radical mastectomy	NA	NA	NA	NA	NA	no	21	30	NA	NA	-22199	0	0	NA	NA	NA	NA
TCGA-E9-A5FL-01A	e3935ce4-64d3-4a66-ba11-d308b844b410	a5fl	alive	0	24	NA	NA	NA	65	NA	NA	NA	NA	right upper outer quadrant	axillary lymph node dissection alone	NA	NA	nationwide children's hospital	NA	NA	NA	tcga-e9-a5fl-f56061	20890005-de58-433a-9ddf-39c1f4a0fddf	canonical	NA	negative	NA	NA	NA	NA	negative	modified radical mastectomy	NA	NA	NA	NA	NA	no	21	24	NA	NA	-24053	0	0	NA	NA	NA	NA
TCGA-E9-A5UO-01A	ed2617c3-5d3b-4688-9283-0f8a10e0b10d	a5uo	alive	0	785	NA	NA	NA	41	NA	NA	NA	NA	right upper outer quadrant	axillary lymph node dissection alone	NA	NA	nationwide children's hospital	NA	NA	NA	tcga-e9-a5uo-f70210	30b02abc-cc95-48d0-985f-42dac16cac58	canonical	NA	NA	NA	NA	NA	NA	NA	other	NA	NA	NA	NA	NA	no	21	30	NA	NA	-15050	0	0	NA	NA	NA	NA
TCGA-E9-A5UP-01A	a412b374-4d25-491f-b76f-ddaa989acf59	a5up	alive	0	803	NA	NA	NA	63	NA	NA	NA	NA	left upper outer quadrant	axillary lymph node dissection alone	NA	NA	nationwide children's hospital	NA	NA	NA	tcga-e9-a5up-f71525	95fb53e8-8b32-4656-9b5c-1384676e9bff	canonical	NA	NA	NA	NA	NA	NA	NA	NA	NA	NA	NA	NA	NA	no	21	26	NA	NA	-23371	0	0	NA	NA	NA	NA
TCGA-E9-A6HE-01A	7e9c8d3c-790c-46ad-8f31-b557b7c26f69	a6he	alive	0	847	NA	NA	NA	45	NA	NA	NA	NA	right	sentinel lymph node biopsy plus axillary dissection	NA	NA	nationwide children's hospital	NA	NA	NA	tcga-e9-a6he-f70947	e4603d87-4400-4911-84c6-3a4d5f0371dc	canonical	NA	positive	NA	NA	NA	NA	positive	simple mastectomy	NA	NA	NA	NA	NA	no	21	10	NA	NA	-16697	0	0	NA	NA	NA	NA
TCGA-EW-A1IW-01A	5e2cbc56-97f9-4b94-ade2-a3f739bcc7be	a1iw	alive	0	371	NA	NA	NA	80	right lower outer quadrant	NA	NA	NA	right lower inner quadrant	sentinel lymph node biopsy plus axillary dissection	NA	NA	nationwide children's hospital	NA	NA	NA	tcga-ew-a1iw-f21380	f2b8499e-0a1a-45da-86ea-531d38617555	canonical	NA	positive	3 point scale	3+	3 point scale	NA	positive	other	NA	NA	NA	NA	NA	yes	21	6	NA	NA	-29529	0	0	NA	NA	no	NA
TCGA-EW-A1IX-01A	e8614b7d-132e-4b4e-b1ae-df8bb4f2d4d4	a1ix	alive	0	1208	NA	NA	NA	48	NA	NA	NA	NA	right upper outer quadrant	sentinel lymph node biopsy plus axillary dissection	NA	NA	nationwide children's hospital	NA	NA	NA	tcga-ew-a1ix-f21542	0aced877-3f0e-4050-a7e1-6ccfe9aebea3	canonical	NA	positive	3 point scale	3+	3 point scale	NA	positive	other	NA	NA	NA	NA	NA	yes	21	6	NA	NA	-17597	0	0	NA	NA	no	NA
TCGA-EW-A1IY-01A	5ff12cbe-a3e0-4ce6-8452-12b984a1baaf	a1iy	alive	0	258	NA	NA	NA	38	NA	NA	NA	NA	right upper inner quadrant	other (specify)	sentinel ln and one non sentinel ln	NA	nationwide children's hospital	NA	NA	NA	tcga-ew-a1iy-f29084	147f2cd8-48e7-43bc-901d-a96966a4abc2	canonical	NA	positive	3 point scale	3+	3 point scale	NA	positive	lumpectomy	NA	NA	NA	NA	NA	yes	21	5	NA	NA	-14122	0	0	NA	NA	no	NA
TCGA-EW-A1IZ-01A	c0f88fc5-56b0-4255-bbd1-9a21ced8b37b	a1iz	alive	0	554	NA	NA	NA	53	NA	NA	NA	NA	left lower outer quadrant	axillary lymph node dissection alone	NA	NA	nationwide children's hospital	NA	NA	NA	tcga-ew-a1iz-f21543	78fcd753-17e1-4043-8a55-b3db082e3a80	canonical	NA	positive	3 point scale	3+	3 point scale	NA	positive	modified radical mastectomy	NA	NA	NA	NA	NA	no	21	6	NA	NA	-19706	0	0	NA	NA	no	NA
TCGA-EW-A1J1-01A	ed6cef77-1bd9-4e3b-b576-550a91e4253a	a1j1	alive	0	575	NA	NA	NA	38	NA	NA	NA	NA	right upper inner quadrant	sentinel lymph node biopsy plus axillary dissection	NA	NA	nationwide children's hospital	NA	NA	NA	tcga-ew-a1j1-f21181	8786a7ff-0211-4148-99e6-b23f288119ff	canonical	NA	positive	3 point scale	3+	3 point scale	NA	positive	lumpectomy	NA	NA	NA	NA	NA	yes	21	3	NA	NA	-14122	0	0	NA	NA	no	NA
TCGA-EW-A1J2-01A	a381275f-8858-4793-a8a2-0ca9db7274c8	a1j2	alive	0	403	NA	NA	NA	50	NA	NA	NA	NA	right lower inner quadrant	sentinel lymph node biopsy plus axillary dissection	NA	NA	nationwide children's hospital	NA	NA	NA	tcga-ew-a1j2-f21544	d0492c5f-c48f-4ff0-92f1-074003210dfe	canonical	NA	positive	3 point scale	3+	3 point scale	NA	positive	other	NA	NA	NA	NA	NA	yes	21	6	NA	NA	-18558	0	0	NA	NA	no	NA
TCGA-EW-A1J3-01A	bb1de798-0c02-437e-b539-33cb556d3993	a1j3	alive	0	504	NA	NA	NA	61	NA	NA	NA	NA	left lower outer quadrant	sentinel node biopsy alone	NA	NA	nationwide children's hospital	NA	NA	NA	tcga-ew-a1j3-f21351	54fffa80-83d5-486f-9a9c-5d2f9b13221f	canonical	NA	positive	3 point scale	3+	3 point scale	NA	positive	other	NA	NA	NA	NA	NA	yes	21	6	NA	NA	-22332	0	0	NA	NA	no	NA
TCGA-EW-A1J6-01A	87281a89-91d2-44f7-9f80-668567ad5c72	a1j6	alive	0	875	NA	NA	NA	70	NA	NA	NA	NA	right upper inner quadrant	sentinel node biopsy alone	NA	NA	nationwide children's hospital	NA	NA	NA	tcga-ew-a1j6-f21347	8d84d7f5-c455-4390-bcc6-c33048e6cc19	canonical	NA	positive	3 point scale	3+	3 point scale	NA	positive	lumpectomy	NA	NA	NA	NA	NA	yes	21	6	NA	NA	-25830	0	0	NA	NA	no	NA
TCGA-EW-A1OV-01A	ac68d219-5670-4ddd-8df6-8aa7ad59e5c7	a1ov	alive	0	789	NA	NA	NA	56	NA	NA	NA	NA	right lower outer quadrant	sentinel node biopsy alone	NA	NA	nationwide children's hospital	NA	NA	NA	tcga-ew-a1ov-f29119	803f6927-592d-459c-ac6d-dbeb52ca6344	canonical	negative	negative	3 point scale	NA	3 point scale	modified radical mastectomy	negative	lumpectomy	NA	NA	NA	NA	NA	yes	21	8	NA	NA	-20764	0	0	NA	NA	no	NA
TCGA-EW-A1OW-01A	f55dd73d-8c36-440b-84e5-9aae53107775	a1ow	alive	0	694	NA	NA	NA	58	NA	NA	NA	NA	left upper outer quadrant	sentinel node biopsy alone	NA	NA	nationwide children's hospital	NA	NA	NA	tcga-ew-a1ow-f29117	7c5b80f1-bf04-41cb-8b91-725221a42bf0	canonical	NA	negative	3 point scale	NA	3 point scale	NA	negative	lumpectomy	NA	NA	NA	NA	NA	yes	21	8	NA	NA	-21465	0	0	NA	NA	no	NA
TCGA-EW-A1OX-01A	5fc7ff35-d3f7-4687-8759-3542bd58e988	a1ox	alive	0	911	NA	NA	NA	43	NA	NA	NA	NA	right upper inner quadrant	other (specify)	sentinel + non sentinel	NA	nationwide children's hospital	NA	NA	NA	tcga-ew-a1ox-f29099	2d559e4d-6b08-44df-ab6d-fc122319ce7e	canonical	NA	positive	3 point scale	3+	3 point scale	NA	positive	lumpectomy	NA	NA	NA	NA	NA	yes	21	8	NA	NA	-15837	0	0	NA	NA	no	NA
TCGA-EW-A1OY-01A	53ff5893-7d5e-4bcb-be9c-665fa34b7824	a1oy	alive	0	908	NA	NA	NA	63	NA	NA	NA	NA	left	sentinel node biopsy alone	NA	NA	nationwide children's hospital	NA	NA	NA	tcga-ew-a1oy-f30950	26fd0127-ad2f-4fab-b570-b297e9cc4efd	canonical	NA	positive	3 point scale	3+	3 point scale	NA	positive	lumpectomy	NA	NA	NA	NA	NA	yes	21	23	NA	NA	-23266	0	0	NA	NA	no	NA
TCGA-EW-A1OZ-01A	8f912a40-3251-4e1f-ae65-1f93d71f9881	a1oz	alive	0	1229	NA	NA	NA	56	NA	NA	NA	NA	left upper outer quadrant	sentinel node biopsy alone	NA	NA	nationwide children's hospital	NA	NA	NA	tcga-ew-a1oz-f29098	652d6657-335d-47dd-b917-8793b786c736	canonical	NA	positive	3 point scale	NA	3 point scale	NA	negative	other	NA	NA	NA	NA	NA	yes	21	8	NA	NA	-20664	0	0	NA	NA	no	NA
TCGA-EW-A1P0-01A	81e32f39-3aa0-468b-87ed-dd2eb6165ddf	a1p0	alive	0	1251	NA	yes	NA	55	NA	NA	NA	NA	left upper outer quadrant	axillary lymph node dissection alone	NA	NA	nationwide children's hospital	NA	NA	NA	tcga-ew-a1p0-f29105	14e24f35-f5dd-4ce1-b35a-7e14ed9bffbb	canonical	NA	positive	3 point scale	NA	3 point scale	NA	negative	modified radical mastectomy	NA	NA	NA	NA	NA	no	21	8	NA	1105	-20107	0	0	NA	NA	yes	NA
TCGA-EW-A1P1-01A	f2e28af9-c40e-41c4-9e82-205cca38f26a	a1p1	alive	0	1210	NA	yes	NA	68	NA	NA	NA	NA	right upper outer quadrant	sentinel lymph node biopsy plus axillary dissection	NA	NA	nationwide children's hospital	NA	NA	NA	tcga-ew-a1p1-f29115	1b13e198-7074-4211-9f1f-edbd860d6f76	canonical	NA	negative	3 point scale	NA	3 point scale	NA	negative	lumpectomy	NA	NA	NA	NA	NA	no	21	8	NA	1200	-24923	0	0	NA	NA	yes	NA
TCGA-EW-A1P4-01A	521e2140-ae5b-456f-8699-97398d009687	a1p4	alive	0	907	NA	NA	NA	43	NA	NA	NA	NA	left upper outer quadrant	sentinel node biopsy alone	NA	NA	nationwide children's hospital	NA	NA	NA	tcga-ew-a1p4-f29684	45eab7c6-bfbf-48ec-b18c-19642b61c70e	canonical	NA	negative	3 point scale	NA	3 point scale	NA	negative	simple mastectomy	NA	NA	NA	NA	NA	yes	21	26	NA	NA	-15989	0	0	NA	NA	no	NA
TCGA-EW-A1P5-01A	53d0af48-d7ea-42c9-8695-c614b89b415b	a1p5	alive	0	703	NA	NA	NA	77	NA	NA	NA	NA	right upper outer quadrant	sentinel lymph node biopsy plus axillary dissection	NA	NA	nationwide children's hospital	NA	NA	NA	tcga-ew-a1p5-f32249	8e77875e-e696-4ae3-86e6-544e806a0dd8	canonical	NA	positive	3 point scale	3+	3 point scale	NA	positive	modified radical mastectomy	NA	NA	NA	NA	NA	yes	21	15	NA	NA	-28177	0	0	NA	NA	no	NA
TCGA-EW-A1P6-01A	ee5744c0-a8dc-43f2-abdd-0b5529a3e9fb	a1p6	alive	0	562	NA	NA	NA	64	NA	NA	NA	NA	right upper outer quadrant	sentinel lymph node biopsy plus axillary dissection	NA	NA	nationwide children's hospital	NA	NA	NA	tcga-ew-a1p6-f29114	7a4439f1-4c6d-474e-b2dd-55e519d70aea	canonical	NA	positive	3 point scale	3+	3 point scale	NA	positive	lumpectomy	NA	NA	NA	NA	NA	yes	21	8	NA	NA	-23485	0	0	NA	NA	no	NA
TCGA-EW-A1P7-01A	01674b2c-5cf2-478f-84a1-f69c39f47bd4	a1p7	alive	0	915	NA	yes	NA	59	NA	NA	NA	NA	right upper outer quadrant	sentinel node biopsy alone	NA	NA	nationwide children's hospital	NA	NA	NA	tcga-ew-a1p7-f29118	19e7f481-84a1-4837-b990-b4172de0dbd5	canonical	NA	negative	3 point scale	NA	3 point scale	NA	negative	lumpectomy	NA	NA	NA	NA	NA	yes	21	8	NA	793	-21750	0	0	NA	NA	no	NA
TCGA-EW-A1P8-01A	359f12f9-5c41-48a4-85bc-fd7e307bf7d8	a1p8	dead	239	239	NA	no	NA	58	NA	NA	NA	NA	left upper outer quadrant	sentinel lymph node biopsy plus axillary dissection	NA	NA	nationwide children's hospital	NA	NA	NA	tcga-ew-a1p8-f29121	8f96b637-28ef-44cb-901f-20ea615880c7	canonical	NA	negative	3 point scale	NA	3 point scale	NA	negative	lumpectomy	NA	NA	NA	NA	NA	no	21	8	NA	NA	-21501	0	0	NA	NA	yes	NA
TCGA-EW-A1PA-01A	4cfef7f9-f1ee-401c-a2a3-c225d4adc3b6	a1pa	alive	0	575	NA	NA	NA	59	NA	NA	NA	NA	left upper outer quadrant	axillary lymph node dissection alone	NA	NA	nationwide children's hospital	NA	NA	NA	tcga-ew-a1pa-f30937	e558b7bc-59d7-435c-8ada-7b2b8b280fbe	canonical	NA	positive	3 point scale	3+	3 point scale	NA	positive	lumpectomy	NA	NA	NA	NA	NA	no	21	8	NA	NA	-21837	0	0	NA	NA	no	NA
TCGA-EW-A1PB-01A	88db1340-e4bf-451a-87c0-6e9168296f5e	a1pb	alive	0	608	NA	NA	NA	70	NA	NA	NA	NA	right upper outer quadrant	axillary lymph node dissection alone	NA	NA	nationwide children's hospital	NA	NA	NA	tcga-ew-a1pb-f29107	3aaf57da-e30c-45a6-b7dd-53cc5ea84417	canonical	NA	negative	3 point scale	NA	3 point scale	NA	negative	simple mastectomy	NA	NA	NA	NA	NA	no	21	8	NA	NA	-25770	0	0	NA	NA	NA	NA
TCGA-EW-A1PC-01A	f45210d3-9e66-4f5e-bef1-5ee5547cc893	a1pc	alive	0	187	NA	NA	NA	66	NA	NA	NA	NA	left	sentinel node biopsy alone	NA	NA	nationwide children's hospital	NA	NA	NA	tcga-ew-a1pc-f29681	a626e120-7532-413f-8810-e8ea00f76b76	canonical	NA	positive	3 point scale	3+	3 point scale	NA	positive	modified radical mastectomy	NA	NA	NA	NA	NA	yes	21	26	NA	NA	-24434	0	0	NA	NA	no	NA
TCGA-EW-A1PD-01A	4dfc233b-ed03-4825-8089-e04cdee99996	a1pd	alive	0	424	NA	NA	NA	61	NA	NA	NA	NA	right	sentinel lymph node biopsy plus axillary dissection	NA	NA	nationwide children's hospital	NA	NA	NA	tcga-ew-a1pd-f29106	aeb2d7f0-8756-4de0-9278-64f6193b5284	canonical	NA	positive	3 point scale	3+	3 point scale	NA	positive	modified radical mastectomy	NA	NA	NA	NA	NA	no	21	8	NA	NA	-22536	0	0	NA	NA	no	NA
TCGA-EW-A1PE-01A	f3b86c02-09a5-4e97-aa7a-86f13f7cda4b	a1pe	alive	0	320	NA	NA	NA	56	NA	NA	NA	NA	left upper outer quadrant	axillary lymph node dissection alone	NA	NA	nationwide children's hospital	NA	NA	NA	tcga-ew-a1pe-f29108	24f4f0ff-7280-401c-aa8d-816162986d9b	canonical	NA	positive	3 point scale	3+	3 point scale	NA	positive	lumpectomy	NA	NA	NA	NA	NA	no	21	8	NA	NA	-20694	0	0	NA	NA	no	NA
TCGA-EW-A1PF-01A	848773a3-2f4a-4186-ab3f-de667129accf	a1pf	alive	0	439	NA	NA	NA	50	NA	NA	NA	NA	right upper outer quadrant	other (specify)	sentinel + 2 non-sentinel ln	NA	nationwide children's hospital	NA	NA	NA	tcga-ew-a1pf-f29109	9341abc2-15c0-4c5d-b764-bb4f2e925c0f	canonical	NA	positive	3 point scale	3+	3 point scale	NA	positive	other	NA	NA	NA	NA	NA	yes	21	8	NA	NA	-18384	0	0	NA	NA	no	NA
TCGA-EW-A1PG-01A	da286247-e8bb-4941-a2af-2453fe61cd02	a1pg	alive	0	1051	NA	NA	NA	53	left lower outer quadrant	NA	NA	NA	left lower inner quadrant	sentinel lymph node biopsy plus axillary dissection	NA	NA	nationwide children's hospital	NA	NA	NA	tcga-ew-a1pg-f29103	8ba6c3bb-bf54-4173-8fd5-bd3a864ea6ec	canonical	NA	positive	3 point scale	3+	3 point scale	NA	positive	modified radical mastectomy	NA	NA	NA	NA	NA	yes	21	8	NA	NA	-19464	0	0	NA	NA	no	NA
TCGA-EW-A1PH-01A	4da999a0-ef41-4a0b-b1d1-446b39cc855a	a1ph	alive	0	607	NA	NA	NA	52	NA	NA	NA	NA	right upper outer quadrant	sentinel lymph node biopsy plus axillary dissection	NA	NA	nationwide children's hospital	NA	NA	NA	tcga-ew-a1ph-f41145	1d45f7e0-49ff-4fe9-ab11-639270b50baf	canonical	NA	negative	3 point scale	NA	3 point scale	NA	negative	lumpectomy	NA	NA	NA	NA	NA	yes	21	12	NA	NA	-19073	0	0	NA	NA	no	NA
TCGA-EW-A2FR-01A	af97e043-88cb-4f99-8f8b-9bcbcccdf842	a2fr	alive	0	1673	NA	NA	NA	59	NA	NA	NA	NA	right upper outer quadrant	axillary lymph node dissection alone	NA	NA	nationwide children's hospital	NA	NA	NA	tcga-ew-a2fr-f42056	7816276a-1574-408c-b73b-519c7de42d56	canonical	NA	negative	3 point scale	1+	3 point scale	NA	negative	lumpectomy	NA	NA	NA	NA	NA	no	21	10	NA	NA	-21628	0	0	NA	NA	no	NA
TCGA-EW-A2FS-01A	d34471a1-b367-4f8a-b35a-c5901c4f5503	a2fs	alive	0	1604	NA	NA	NA	41	NA	NA	NA	NA	left upper outer quadrant	sentinel node biopsy alone	NA	NA	nationwide children's hospital	NA	NA	NA	tcga-ew-a2fs-f42061	07000f6b-f69e-4b6b-ab76-a744bb203540	canonical	NA	positive	3 point scale	1+	3 point scale	NA	negative	lumpectomy	NA	NA	NA	NA	NA	yes	21	10	NA	NA	-15302	0	0	NA	NA	no	NA
TCGA-EW-A2FV-01A	f45aa0b2-f3de-4db5-9730-e5c6c4e2ed3a	a2fv	alive	0	788	NA	NA	NA	39	NA	NA	NA	NA	left upper inner quadrant	axillary lymph node dissection alone	NA	NA	nationwide children's hospital	NA	NA	NA	tcga-ew-a2fv-f42065	54f63442-7ae5-4512-b4d8-853d2f27707a	canonical	negative	positive	3 point scale	3+	3 point scale	NA	positive	modified radical mastectomy	NA	NA	NA	NA	NA	no	21	10	NA	NA	-14316	0	0	NA	NA	no	NA
TCGA-EW-A2FW-01A	e6f527a2-38eb-457e-bb39-3c5b9c0bcbec	a2fw	alive	0	672	NA	NA	NA	52	NA	NA	NA	NA	right upper outer quadrant	sentinel node biopsy alone	NA	NA	nationwide children's hospital	NA	NA	NA	tcga-ew-a2fw-f42062	15c65211-a67d-4438-ba46-7de122db17fb	canonical	NA	positive	3 point scale	3+	3 point scale	NA	positive	lumpectomy	NA	NA	NA	NA	NA	yes	21	10	NA	NA	-19085	0	0	NA	NA	no	NA
TCGA-EW-A3E8-01A	c0b7b798-3383-4a45-a455-9eca5810739e	a3e8	alive	0	1035	NA	NA	NA	60	left upper outer quadrant	NA	NA	NA	left	sentinel lymph node biopsy plus axillary dissection	NA	NA	nationwide children's hospital	NA	NA	NA	tcga-ew-a3e8-f57617	71b7d2cc-2481-4609-94cb-593371e7ee7d	canonical	NA	positive	NA	NA	NA	NA	negative	simple mastectomy	NA	NA	NA	NA	NA	NA	21	18	NA	NA	-21922	0	0	NA	NA	NA	NA
TCGA-EW-A3U0-01A	d9dc3b59-613d-469e-8b4f-6c5a557eb26a	a3u0	alive	0	532	NA	NA	NA	61	NA	NA	NA	NA	left	sentinel lymph node biopsy plus axillary dissection	NA	NA	nationwide children's hospital	NA	NA	NA	tcga-ew-a3u0-f42032	5fbf8a7f-c830-4250-b7c4-a372bc4db5a7	canonical	NA	negative	NA	NA	NA	NA	negative	other	NA	NA	NA	NA	NA	no	21	9	NA	NA	-22520	0	0	NA	NA	no	NA
TCGA-EW-A423-01A	bdd08ec8-8892-4273-8f21-6fde0f23c52d	a423	alive	0	533	NA	NA	NA	75	NA	NA	NA	NA	left upper inner quadrant	sentinel node biopsy alone	NA	NA	nationwide children's hospital	NA	NA	NA	tcga-ew-a423-f42558	ccafbc43-edb6-41cb-90f2-65b874ebd3e2	canonical	NA	positive	NA	NA	NA	NA	positive	lumpectomy	NA	NA	NA	NA	NA	no	21	18	NA	NA	-27627	0	0	NA	NA	NA	NA
TCGA-EW-A424-01A	a6502f17-6bee-4d5a-8520-06364593d39c	a424	alive	0	715	NA	NA	NA	51	NA	NA	NA	NA	right	sentinel node biopsy alone	NA	NA	nationwide children's hospital	NA	NA	NA	tcga-ew-a424-f57612	9802329b-33eb-43f6-810f-6166ce0d1ec3	canonical	NA	positive	NA	NA	NA	NA	positive	simple mastectomy	NA	NA	NA	NA	NA	yes	21	18	NA	NA	-18850	0	0	NA	NA	NA	NA
TCGA-EW-A6S9-01A	9676e46b-8f29-43cd-ab65-eb6a535cced4	a6s9	alive	0	463	NA	NA	NA	34	right upper outer quadrant	NA	NA	NA	right	NA	NA	NA	nationwide children's hospital	NA	NA	NA	tcga-ew-a6s9-f71706	873f23ee-d1b9-48b8-b112-c6ce519dd5af	canonical	NA	positive	NA	NA	NA	NA	positive	lumpectomy	NA	NA	NA	NA	NA	NA	21	30	NA	NA	-12755	0	0	NA	NA	NA	NA
TCGA-EW-A6SA-01A	aba5f46a-e67a-4cd2-9c52-c0686968ff04	a6sa	alive	0	510	NA	NA	NA	59	left lower inner quadrant	NA	NA	NA	left	sentinel node biopsy alone	NA	NA	nationwide children's hospital	NA	NA	NA	NA	NA	canonical	NA	positive	NA	NA	NA	NA	negative	simple mastectomy	NA	NA	NA	NA	NA	yes	21	27	NA	NA	-21623	0	0	NA	NA	NA	NA
TCGA-EW-A6SB-01A	5c59028f-b8fa-4811-8314-be3eaed5f364	a6sb	alive	0	760	NA	NA	NA	62	left upper inner quadrant	NA	NA	NA	left	sentinel node biopsy alone	NA	NA	nationwide children's hospital	NA	NA	NA	NA	NA	canonical	NA	negative	NA	NA	NA	NA	negative	modified radical mastectomy	NA	NA	NA	NA	NA	yes	21	12	NA	NA	-22844	0	0	NA	NA	NA	NA
TCGA-EW-A6SC-01A	97862b8e-9f76-4b19-a865-156a9c00fb1e	a6sc	alive	0	952	NA	NA	NA	60	left upper outer quadrant	NA	NA	NA	left	sentinel node biopsy alone	NA	NA	nationwide children's hospital	NA	NA	NA	tcga-ew-a6sc-f71017	cf93ec15-3023-43a4-9ce7-8b0afdf5af21	canonical	NA	positive	NA	NA	NA	NA	positive	lumpectomy	NA	NA	NA	NA	NA	yes	21	12	NA	NA	-21918	0	0	NA	NA	NA	NA
TCGA-EW-A6SD-01A	42378dbc-a123-4cf9-8502-165e89fda271	a6sd	alive	0	1010	NA	NA	NA	32	left upper outer quadrant	NA	NA	NA	left	NA	NA	NA	nationwide children's hospital	NA	NA	NA	NA	NA	canonical	NA	negative	NA	NA	NA	NA	negative	lumpectomy	NA	NA	NA	NA	NA	NA	21	14	NA	NA	-12006	0	0	NA	NA	NA	NA
TCGA-GI-A2C8-01A	33fe5833-d7a0-43d7-a03d-56985ea448a6	a2c8	alive	0	225	NA	NA	NA	63	NA	NA	NA	NA	right	sentinel node biopsy alone	NA	NA	nationwide children's hospital	NA	NA	case matched expression control	tcga-gi-a2c8-f21661	89c2725e-ffd1-4357-a966-fd0dbfb12860	canonical - plus	NA	positive	3 point scale	2+	3 point scale	NA	positive	modified radical mastectomy	NA	NA	NA	NA	NA	no	21	8	NA	NA	-23103	0	0	NA	NA	no	NA
TCGA-GI-A2C9-01A	9f6be944-83de-42ab-8738-f0022f475e61	a2c9	alive	0	3342	NA	NA	NA	58	NA	NA	NA	NA	right	sentinel lymph node biopsy plus axillary dissection	NA	NA	nationwide children's hospital	case matched methylation control	NA	case matched expression control	tcga-gi-a2c9-f21663	c2067cda-e620-41e9-9545-34875b29bc1f	canonical - plus	NA	negative	NA	NA	NA	NA	negative	lumpectomy	NA	NA	NA	NA	NA	yes	21	8	NA	NA	-21534	0	0	NA	NA	no	NA
TCGA-GM-A2D9-01A	1133b8a9-6b11-4511-b70a-f200e3b8b5db	a2d9	dead	1812	1812	NA	NA	NA	69	NA	NA	NA	NA	left upper inner quadrant	sentinel node biopsy alone	NA	NA	nationwide children's hospital	NA	NA	NA	tcga-gm-a2d9-f47033	6b63fe41-80f5-49ec-9ad0-40b71fed880d	canonical	NA	positive	3 point scale	3+	3 point scale	NA	positive	lumpectomy	NA	NA	NA	NA	NA	yes	21	21	NA	NA	-25490	0	0	NA	NA	yes	NA
TCGA-GM-A2DA-01A	c07b122e-ac50-4db2-add2-5617a5d0e976	a2da	dead	6593	6593	NA	NA	NA	46	right upper outer quadrant	NA	NA	NA	right upper inner quadrant	axillary lymph node dissection alone	NA	NA	nationwide children's hospital	NA	NA	NA	tcga-gm-a2da-f47040	1fe24e96-5d31-480a-9aa9-c2702ee3abaf	canonical	NA	positive	NA	NA	NA	NA	positive	modified radical mastectomy	NA	NA	NA	NA	NA	no	21	21	NA	NA	-16854	0	0	NA	NA	yes	NA
TCGA-GM-A2DB-01A	6e6b7742-a562-490b-bb72-04a5653852e4	a2db	alive	0	2406	NA	NA	NA	62	NA	NA	NA	NA	left upper outer quadrant	sentinel node biopsy alone	NA	NA	nationwide children's hospital	NA	NA	NA	tcga-gm-a2db-f47156	5f9bc2b1-50f3-4a6f-9b76-6be7330fca84	canonical	NA	negative	NA	NA	NA	NA	negative	lumpectomy	NA	NA	NA	NA	NA	yes	21	22	NA	NA	-22883	0	0	NA	NA	no	NA
TCGA-GM-A2DC-01A	dd43ffd9-da18-4ad3-abe7-6f443c76a717	a2dc	alive	0	2535	NA	NA	NA	57	NA	NA	NA	NA	right upper outer quadrant	axillary lymph node dissection alone	NA	NA	nationwide children's hospital	NA	NA	NA	tcga-gm-a2dc-f47061	6ac27496-a61a-402e-bf63-5af1d989727e	canonical	NA	positive	NA	NA	NA	NA	positive	lumpectomy	NA	NA	NA	NA	NA	no	21	22	NA	NA	-21122	0	0	NA	NA	no	NA
TCGA-GM-A2DF-01A	d6f7afc0-1558-43ad-acb1-2b5311ed2264	a2df	alive	0	2155	NA	NA	NA	53	NA	NA	NA	NA	left lower outer quadrant	axillary lymph node dissection alone	NA	NA	nationwide children's hospital	NA	NA	NA	tcga-gm-a2df-f47074	5ea23820-4945-4615-b3d5-2407c809951b	canonical	NA	negative	NA	NA	NA	NA	negative	lumpectomy	NA	NA	NA	NA	NA	no	21	22	NA	NA	-19614	0	0	NA	NA	no	NA
TCGA-GM-A2DH-01A	5700c1b3-922a-4401-8ab8-89028908d696	a2dh	alive	0	2193	NA	NA	NA	58	NA	NA	NA	NA	right upper outer quadrant	sentinel node biopsy alone	NA	NA	nationwide children's hospital	NA	NA	NA	tcga-gm-a2dh-f47081	42fcc169-41bb-48f3-bb58-86689559bd62	canonical	NA	negative	NA	NA	NA	NA	negative	simple mastectomy	NA	NA	NA	NA	NA	yes	21	22	NA	NA	-21344	0	0	NA	NA	no	NA
TCGA-GM-A2DI-01A	66fa504c-4ae4-49ac-9355-1e063776dc0d	a2di	alive	0	2590	NA	NA	NA	52	NA	NA	NA	NA	left upper inner quadrant	sentinel node biopsy alone	NA	NA	nationwide children's hospital	NA	NA	NA	tcga-gm-a2di-f47089	64bbff53-4a07-4474-8016-57dee132ec2e	canonical	NA	negative	NA	NA	NA	NA	negative	simple mastectomy	NA	NA	NA	NA	NA	yes	21	22	NA	NA	-19030	0	0	NA	NA	no	NA
TCGA-GM-A2DK-01A	3a0775a0-61ae-43f2-b5f6-629a44355c2f	a2dk	alive	0	2645	NA	NA	NA	58	NA	NA	NA	NA	right upper outer quadrant	sentinel node biopsy alone	NA	NA	nationwide children's hospital	NA	NA	NA	tcga-gm-a2dk-f47094	1c4e8267-609b-4503-afc4-77f7b38531a0	canonical	NA	positive	NA	NA	NA	NA	negative	lumpectomy	NA	NA	NA	NA	NA	yes	21	22	NA	NA	-21198	0	0	NA	NA	no	NA
TCGA-GM-A2DL-01A	a76774fe-7298-4d68-a2b2-c1bad93f0c31	a2dl	alive	0	3519	NA	NA	NA	50	NA	NA	NA	NA	left upper outer quadrant	sentinel node biopsy alone	NA	NA	nationwide children's hospital	NA	NA	NA	tcga-gm-a2dl-f47098	050d20e4-bb66-4d0f-b205-e99c63577775	canonical	NA	positive	NA	NA	NA	NA	positive	lumpectomy	NA	NA	NA	NA	NA	yes	21	22	NA	NA	-18475	0	0	NA	NA	no	NA
TCGA-GM-A2DM-01A	753d5d49-3b40-4737-9d4c-b1ec29cc2692	a2dm	alive	0	3226	NA	NA	NA	57	NA	NA	NA	NA	right lower outer quadrant	sentinel node biopsy alone	NA	NA	nationwide children's hospital	NA	NA	NA	tcga-gm-a2dm-f47104	3acb5cdd-7afc-45d0-9145-0ec2dd8ee8e0	canonical	NA	positive	NA	NA	NA	NA	positive	lumpectomy	NA	NA	NA	NA	NA	yes	21	22	NA	NA	-21160	0	0	NA	NA	no	NA
TCGA-GM-A2DN-01A	56bbd282-b88d-4730-9242-ab97d08dc83a	a2dn	alive	0	3091	NA	NA	NA	58	NA	NA	NA	NA	left upper outer quadrant	sentinel lymph node biopsy plus axillary dissection	NA	NA	nationwide children's hospital	NA	NA	NA	tcga-gm-a2dn-f47124	8c417396-011e-4c2e-b08c-42a8a47ea1d7	canonical	NA	positive	NA	NA	NA	NA	positive	modified radical mastectomy	NA	NA	NA	NA	NA	yes	21	22	NA	NA	-21288	0	0	NA	NA	no	NA
TCGA-GM-A3NW-01A	6ddaee34-46eb-490c-bd13-f0ab963c4322	a3nw	alive	0	3361	NA	NA	NA	63	NA	NA	NA	NA	left upper inner quadrant	sentinel node biopsy alone	NA	NA	nationwide children's hospital	NA	NA	NA	tcga-gm-a3nw-f40398	8b23b0f0-7990-4f02-878a-3d61df21db52	canonical	NA	negative	NA	NA	NA	NA	positive	simple mastectomy	NA	NA	NA	NA	NA	yes	21	18	NA	NA	-23041	0	0	NA	NA	no	NA
TCGA-GM-A3NY-01A	bd5374c9-7f36-457f-b66b-7cc7ff64224e	a3ny	alive	0	1162	NA	NA	NA	72	NA	NA	NA	NA	left upper outer quadrant	axillary lymph node dissection alone	NA	NA	nationwide children's hospital	NA	NA	NA	tcga-gm-a3ny-f40403	055bbb55-226c-4908-8773-39a4e65a9e37	canonical	NA	positive	NA	NA	NA	NA	positive	lumpectomy	NA	NA	NA	NA	NA	no	21	19	NA	NA	-26642	0	0	NA	NA	no	NA
TCGA-GM-A3XG-01A	6f0fd68f-ed6a-4c9e-be02-c97ba4950f76	a3xg	alive	0	1330	NA	NA	NA	46	right upper outer quadrant	NA	NA	NA	right	sentinel lymph node biopsy plus axillary dissection	NA	NA	nationwide children's hospital	NA	NA	NA	tcga-gm-a3xg-f46963	9ccd1072-5a2e-4cca-aa65-daefdfe36a3a	canonical	NA	positive	NA	NA	NA	NA	positive	modified radical mastectomy	NA	NA	NA	NA	NA	yes	21	20	NA	NA	-16948	0	0	NA	NA	NA	NA
TCGA-GM-A3XL-01A	65cac997-4d39-4501-85ec-4fcb328a8eb5	a3xl	alive	0	2108	NA	NA	NA	49	right upper outer quadrant	NA	NA	NA	right	sentinel node biopsy alone	NA	NA	nationwide children's hospital	NA	NA	NA	tcga-gm-a3xl-f41970	fd97c14f-e6e6-45d7-9912-84402aecad79	canonical	NA	negative	NA	NA	NA	NA	negative	lumpectomy	NA	NA	NA	NA	NA	yes	21	8	NA	NA	-18171	0	0	NA	NA	NA	NA
TCGA-GM-A3XN-01A	0930e97a-72ea-4bd5-b2f0-50c76af695f3	a3xn	alive	0	2019	NA	NA	NA	44	left upper outer quadrant	NA	NA	NA	left	sentinel lymph node biopsy plus axillary dissection	NA	NA	nationwide children's hospital	NA	NA	NA	tcga-gm-a3xn-f46967	d2d39b9a-798a-44e3-8bdb-5d3da01f9bdd	canonical	NA	positive	NA	NA	NA	NA	positive	lumpectomy	NA	NA	NA	NA	NA	no	21	20	NA	NA	-16109	0	0	NA	NA	NA	NA
TCGA-GM-A4E0-01A	6397d7bc-9cb1-4a84-81ad-76954e0a8cee	a4e0	alive	0	2191	NA	NA	NA	67	left upper inner quadrant	left upper outer quadrant	left lower inner quadrant	left lower outer quadrant	left	sentinel lymph node biopsy plus axillary dissection	NA	NA	nationwide children's hospital	NA	NA	NA	tcga-gm-a4e0-f47030	50501d80-a3ce-4bd5-aa63-fbfb3eb907a3	canonical	NA	positive	NA	NA	NA	NA	positive	modified radical mastectomy	NA	NA	NA	NA	NA	yes	21	21	NA	NA	-24788	0	0	NA	NA	NA	NA
TCGA-GM-A5PV-01A	67c8dc41-edcb-4563-96b3-3f93f9edcbe9	a5pv	alive	0	412	NA	NA	NA	63	NA	NA	NA	NA	right	sentinel lymph node biopsy plus axillary dissection	NA	NA	nationwide children's hospital	NA	NA	NA	NA	NA	canonical	NA	positive	NA	NA	NA	NA	positive	modified radical mastectomy	NA	NA	NA	NA	NA	no	21	12	NA	NA	-23215	0	0	NA	NA	NA	NA
TCGA-GM-A5PX-01A	f7064d01-29d8-49a2-ad60-1e0c5f148f3e	a5px	alive	0	551	NA	NA	NA	65	NA	NA	NA	NA	left	sentinel lymph node biopsy plus axillary dissection	NA	NA	nationwide children's hospital	NA	NA	NA	NA	NA	canonical	NA	positive	NA	NA	NA	NA	positive	simple mastectomy	NA	NA	NA	NA	NA	yes	21	12	NA	NA	-23753	0	0	NA	NA	NA	NA
TCGA-HN-A2NL-01A	124b693c-77dc-4fa8-b703-54e8b5054a92	a2nl	alive	0	79	NA	NA	NA	56	NA	NA	NA	NA	left upper outer quadrant	sentinel node biopsy alone	NA	NA	nationwide children's hospital	NA	NA	NA	tcga-hn-a2nl-f60149	0cba7fe6-a784-4125-bbe8-43108d8e03e2	canonical	NA	negative	NA	NA	NA	NA	negative	simple mastectomy	NA	NA	NA	NA	NA	yes	21	30	NA	NA	-20483	NA	0	NA	NA	NA	NA
TCGA-HN-A2OB-01A	61204cdf-3b1c-44a1-bda6-0fef1ac4a333	a2ob	dead	1900	1900	NA	NA	NA	45	right lower outer quadrant	NA	NA	NA	right	sentinel node biopsy alone	NA	NA	nationwide children's hospital	NA	NA	NA	tcga-hn-a2ob-f71891	7b121c24-0bf5-4f56-9b8f-aac37393c325	canonical	NA	positive	NA	NA	NA	NA	positive	simple mastectomy	NA	NA	NA	NA	NA	no	21	1	NA	NA	-16672	NA	0	NA	NA	NA	NA
TCGA-JL-A3YW-01A	a2434f47-2168-47d0-9bbb-981071597843	a3yw	alive	0	360	NA	NA	NA	49	NA	NA	NA	NA	left	axillary lymph node dissection alone	NA	NA	nationwide children's hospital	NA	NA	NA	NA	NA	canonical	NA	positive	3 point scale	3+	3 point scale	NA	positive	modified radical mastectomy	NA	NA	NA	NA	NA	NA	21	8	NA	NA	NA	0	0	NA	NA	NA	NA
TCGA-JL-A3YX-01A	75f6e476-233a-409c-a3ef-0240be569813	a3yx	alive	0	352	NA	NA	NA	46	NA	NA	NA	NA	left	axillary lymph node dissection alone	NA	NA	nationwide children's hospital	NA	NA	NA	NA	NA	canonical	NA	positive	3 point scale	2+	3 point scale	NA	positive	modified radical mastectomy	NA	NA	NA	NA	NA	NA	21	8	NA	NA	NA	0	0	NA	NA	NA	NA
TCGA-LD-A66U-01A	38dc3e09-0b0e-4a29-b318-cc0352013dae	a66u	alive	0	646	NA	NA	NA	44	NA	NA	NA	NA	right upper outer quadrant	sentinel lymph node biopsy plus axillary dissection	NA	NA	nationwide children's hospital	NA	NA	NA	tcga-ld-a66u-f63067	6aa69a72-7696-47f4-b184-4f5f74969ddd	canonical	NA	positive	3 point scale	3+	3 point scale	NA	positive	modified radical mastectomy	NA	NA	NA	NA	NA	no	21	30	NA	NA	-16101	0	0	NA	NA	NA	NA
TCGA-LD-A7W5-01A	a06ff6ae-b0dd-4516-a75c-0db71694b46b	a7w5	alive	0	216	NA	NA	NA	52	NA	NA	NA	NA	left upper outer quadrant	axillary lymph node dissection alone	NA	NA	nationwide children's hospital	NA	NA	NA	tcga-ld-a7w5-f69184	32c744cb-6c00-4920-9077-111c970d52ba	canonical	NA	positive	3 point scale	NA	3 point scale	NA	positive	lumpectomy	NA	NA	NA	NA	NA	no	21	30	NA	NA	-19169	0	0	NA	NA	NA	NA
TCGA-LD-A7W6-01A	0b0f9938-ce1e-4814-8821-0132d137eb9e	a7w6	alive	0	404	NA	NA	NA	54	right upper inner quadrant	NA	NA	NA	right	axillary lymph node dissection alone	NA	NA	nationwide children's hospital	NA	NA	NA	tcga-ld-a7w6-f69193	51cdd6f7-8467-42f0-8b9f-4c3bd0c4afd9	canonical	NA	positive	3 point scale	NA	3 point scale	NA	positive	modified radical mastectomy	NA	NA	NA	NA	NA	no	21	30	NA	NA	-20077	0	0	NA	NA	NA	NA
TCGA-LD-A9QF-01A	95c53ecf-d8f1-4bcb-9b1a-c9a0542939f0	a9qf	alive	0	323	NA	NA	NA	73	NA	NA	NA	NA	left	sentinel node biopsy alone	NA	NA	nationwide children's hospital	NA	NA	NA	tcga-ld-a9qf-f69216	3602b53b-6e99-4063-ac77-94842ca333c4	canonical	NA	negative	NA	NA	NA	NA	negative	simple mastectomy	NA	NA	NA	NA	NA	yes	21	30	NA	NA	-26869	0	0	NA	NA	NA	NA
TCGA-LL-A441-01A	69fc24fc-cfe2-487a-935f-1a954b30b709	a441	alive	0	996	NA	NA	NA	62	NA	NA	NA	NA	right upper outer quadrant	sentinel lymph node biopsy plus axillary dissection	NA	NA	nationwide children's hospital	NA	NA	NA	tcga-ll-a441-f46386	942378ca-13da-43cb-9fe1-a95010c3b668	canonical	NA	negative	3 point scale	NA	3 point scale	NA	negative	lumpectomy	NA	NA	NA	NA	NA	yes	21	7	NA	NA	-22772	0	0	NA	NA	NA	NA
TCGA-LL-A5YL-01A	1d75e89d-4b01-443c-be54-749c7a667bf4	a5yl	alive	0	519	NA	NA	NA	64	right upper inner quadrant	NA	NA	NA	right	sentinel lymph node biopsy plus axillary dissection	NA	NA	nationwide children's hospital	NA	NA	NA	tcga-ll-a5yl-f59650	0fbeaac5-77a9-4e92-9b8f-e11aa2f05535	canonical	NA	positive	3 point scale	NA	3 point scale	NA	negative	simple mastectomy	NA	NA	NA	NA	NA	NA	21	19	NA	NA	-23395	0	0	NA	NA	NA	NA
TCGA-LL-A5YM-01A	e9a12df9-024e-4cbc-b6bf-e4e87485fa90	a5ym	alive	0	466	NA	NA	NA	88	left upper inner quadrant	NA	NA	NA	left	no axillary staging	NA	NA	nationwide children's hospital	NA	NA	NA	tcga-ll-a5ym-f57541	d396d059-cf4a-4f46-86d7-079fa3777796	canonical	negative	positive	3 point scale	3+	3 point scale	mastectomy nos	positive	other	NA	NA	NA	NA	NA	NA	21	14	NA	NA	-32478	0	0	NA	NA	NA	NA
TCGA-LL-A5YN-01A	ef1b3332-cd7f-41bb-a2d3-2538e7becc5c	a5yn	alive	0	447	NA	NA	NA	46	right upper inner quadrant	NA	NA	NA	right	sentinel node biopsy alone	NA	NA	nationwide children's hospital	NA	NA	NA	tcga-ll-a5yn-f59362	043e9e03-a7ca-4da6-bfca-0fc75f6a5750	canonical	NA	positive	3 point scale	3+	3 point scale	NA	positive	lumpectomy	NA	NA	NA	NA	NA	no	21	9	NA	NA	-16884	0	0	NA	NA	NA	NA
TCGA-LL-A5YO-01A	b8aefc48-4a6e-4254-a57f-5f688399b582	a5yo	alive	0	440	NA	NA	NA	50	NA	NA	NA	NA	left upper outer quadrant	sentinel node biopsy alone	NA	NA	nationwide children's hospital	NA	NA	NA	tcga-ll-a5yo-f58638	8d9af5e1-0a39-49ce-9f74-cb0d3a1e192e	canonical	NA	negative	NA	NA	NA	NA	negative	lumpectomy	NA	NA	NA	NA	NA	yes	21	17	NA	NA	-18354	0	0	NA	NA	NA	NA
TCGA-LL-A6FP-01A	5c9d8163-a68e-43ce-9cba-effb7405761e	a6fp	alive	0	677	NA	NA	NA	90	NA	NA	NA	NA	right upper outer quadrant	no axillary staging	NA	NA	nationwide children's hospital	NA	NA	NA	tcga-ll-a6fp-f64050	31bbe6d1-6af1-4980-985b-a696679676aa	canonical	NA	positive	3 point scale	1+	3 point scale	NA	positive	simple mastectomy	NA	NA	NA	NA	NA	no	21	25	NA	NA	-32873	0	0	NA	NA	NA	NA
TCGA-LL-A6FQ-01A	92b842c5-f71b-4ef7-ba86-358d28e0966f	a6fq	alive	0	80	NA	NA	NA	77	NA	NA	NA	NA	right upper outer quadrant	axillary lymph node dissection alone	NA	NA	nationwide children's hospital	NA	NA	NA	tcga-ll-a6fq-f58204	804405b3-e0c3-4f4d-985a-1af09f39e17f	canonical	NA	positive	3 point scale	2+	3 point scale	NA	positive	modified radical mastectomy	NA	NA	NA	NA	NA	yes	21	2	NA	NA	-28375	0	0	NA	NA	NA	NA
TCGA-LL-A6FR-01A	1347c23d-8d6e-4c15-9461-640249838c96	a6fr	alive	0	489	NA	NA	NA	50	right lower inner quadrant	NA	NA	NA	right	sentinel node biopsy alone	NA	NA	nationwide children's hospital	NA	NA	NA	tcga-ll-a6fr-f64045	37b5965a-69c8-46a2-92ce-4a03623af4ac	canonical	NA	negative	NA	1+	3 point scale	NA	positive	lumpectomy	NA	NA	NA	NA	NA	yes	21	25	NA	NA	-18520	0	0	NA	NA	NA	NA
TCGA-LL-A73Y-01A	ea645243-df49-4466-a255-9f3d4321e357	a73y	alive	0	477	NA	NA	NA	67	right upper inner quadrant	NA	NA	NA	right	sentinel node biopsy alone	NA	NA	nationwide children's hospital	NA	NA	NA	tcga-ll-a73y-f67099	e9959843-2f90-4bf2-b36d-9c4f8836a0e1	canonical	NA	negative	3 point scale	3+	3 point scale	NA	negative	simple mastectomy	NA	NA	NA	NA	NA	no	21	30	NA	NA	-24647	0	0	NA	NA	NA	NA
TCGA-LL-A73Z-01A	3e637872-f5e5-49d3-bb0d-9c16b8713382	a73z	dead	227	227	NA	NA	NA	55	left lower inner quadrant	NA	NA	NA	left	no axillary staging	NA	NA	nationwide children's hospital	NA	NA	NA	tcga-ll-a73z-f64983	c93234c7-bf07-45d1-b6c1-80938475f7b5	canonical	NA	positive	3 point scale	1+	3 point scale	NA	positive	lumpectomy	NA	NA	NA	NA	NA	no	21	16	NA	NA	-20118	0	0	NA	NA	NA	NA
TCGA-LL-A7SZ-01A	09a5e9fd-d816-4f8c-baa9-0e40ba607b16	a7sz	alive	0	594	NA	NA	NA	49	NA	NA	NA	NA	left upper outer quadrant	axillary lymph node dissection alone	NA	NA	nationwide children's hospital	NA	NA	NA	tcga-ll-a7sz-f66973	1d00374c-84a6-4dc5-97f4-0c60d6ada5be	canonical	NA	positive	3 point scale	2+	3 point scale	NA	positive	other	NA	NA	NA	NA	NA	yes	21	29	NA	NA	-18161	0	0	NA	NA	NA	NA
TCGA-LL-A7T0-01A	d8f8064f-02ef-4fed-942b-714cbe5e8455	a7t0	alive	0	376	NA	NA	NA	70	NA	NA	NA	NA	left lower inner quadrant	axillary lymph node dissection alone	NA	NA	nationwide children's hospital	NA	NA	NA	tcga-ll-a7t0-f64970	5e8482f3-aa4b-4156-a3dd-f383b7ff97d8	canonical	NA	positive	3 point scale	1+	3 point scale	NA	positive	simple mastectomy	NA	NA	NA	NA	NA	no	21	16	NA	NA	-25867	0	0	NA	NA	NA	NA
TCGA-LL-A8F5-01A	e1786e78-ac46-46fd-8ce0-8f7456e46082	a8f5	alive	0	596	NA	NA	NA	61	right upper inner quadrant	NA	NA	NA	right	sentinel node biopsy alone	NA	NA	nationwide children's hospital	NA	NA	NA	tcga-ll-a8f5-f66965	f431bc83-8b10-4b98-8517-31411bc2cc4a	canonical	NA	positive	3 point scale	NA	3 point scale	NA	negative	lumpectomy	NA	NA	NA	NA	NA	yes	21	29	NA	NA	-22544	0	0	NA	NA	NA	NA
TCGA-LL-A9Q3-01A	6af6d256-a753-46d2-b611-e4094ff265aa	a9q3	alive	0	532	NA	NA	NA	69	NA	NA	NA	NA	left upper outer quadrant	axillary lymph node dissection alone	NA	NA	nationwide children's hospital	NA	NA	NA	tcga-ll-a9q3-f67103	21e69907-81f4-4c83-accc-e79ffe88b38c	canonical	NA	positive	3 point scale	2+	3 point scale	NA	positive	modified radical mastectomy	NA	NA	NA	NA	NA	yes	21	30	NA	NA	-25477	0	0	NA	NA	NA	NA
TCGA-LQ-A4E4-01A	4f321d41-3255-46a4-ae0d-1cf39699e624	a4e4	alive	0	849	NA	NA	NA	73	NA	NA	NA	NA	right upper outer quadrant	sentinel lymph node biopsy plus axillary dissection	NA	NA	nationwide children's hospital	NA	NA	NA	tcga-lq-a4e4-f52290	10069aff-4c83-4d78-8926-50b590e2c1b3	canonical	NA	positive	3 point scale	1+	3 point scale	NA	positive	modified radical mastectomy	NA	NA	NA	NA	NA	no	21	2	NA	NA	-26883	0	0	NA	NA	NA	NA
TCGA-MS-A51U-01A	910655da-2c12-4572-96b7-ded616e69b4b	a51u	alive	0	681	NA	NA	NA	44	left lower outer quadrant	left	NA	NA	left upper outer quadrant	NA	NA	NA	nationwide children's hospital	NA	NA	NA	tcga-ms-a51u-f59818	5cc7e973-2b41-4164-b766-828ca02625f3	canonical	NA	positive	NA	NA	NA	NA	positive	modified radical mastectomy	NA	NA	NA	NA	NA	NA	21	4	NA	NA	-16213	0	0	NA	NA	no	NA
TCGA-OK-A5Q2-01A	cd7fb75e-1c2e-4201-86d3-b3ba21f476bf	a5q2	alive	0	64	NA	NA	NA	59	NA	NA	NA	NA	right	axillary lymph node dissection alone	NA	NA	nationwide children's hospital	NA	NA	NA	NA	NA	canonical	NA	positive	3 point scale	3+	3 point scale	NA	positive	modified radical mastectomy	NA	NA	NA	NA	NA	yes	21	22	NA	NA	-21555	0	0	NA	NA	NA	NA
TCGA-OL-A5D6-01A	c3a981c7-f148-4252-bd50-af8a49ec0df8	a5d6	dead	1104	1104	NA	NA	NA	71	NA	NA	NA	NA	left lower outer quadrant	sentinel node biopsy alone	NA	NA	nationwide children's hospital	NA	NA	NA	tcga-ol-a5d6-f55437	9b1d5a06-6684-47e7-b1bc-96a9ffe8ba2a	canonical	NA	negative	NA	NA	NA	NA	negative	simple mastectomy	NA	NA	NA	NA	NA	NA	21	10	NA	NA	-26052	0	0	NA	NA	NA	NA
TCGA-OL-A5D7-01A	c8f39325-5382-447c-9291-a6915fc978b8	a5d7	alive	0	1780	NA	NA	NA	70	NA	NA	NA	NA	left upper outer quadrant	sentinel node biopsy alone	NA	NA	nationwide children's hospital	NA	NA	NA	tcga-ol-a5d7-f55439	81e1b508-543a-4e66-856f-86048dfaf64a	canonical	NA	negative	NA	NA	NA	NA	negative	lumpectomy	NA	NA	NA	NA	NA	NA	21	10	NA	NA	-25643	0	0	NA	NA	NA	NA
TCGA-OL-A5D8-01A	6d4860b2-21c6-4b7b-9093-2f32700d0612	a5d8	alive	0	973	NA	NA	NA	40	NA	NA	NA	NA	left lower outer quadrant	other (specify)	axillary ultrasound	NA	nationwide children's hospital	NA	NA	NA	tcga-ol-a5d8-f55438	85cd1c5f-d1d1-4a4d-b071-233563fa3d44	canonical	NA	positive	NA	NA	NA	NA	positive	simple mastectomy	NA	NA	NA	NA	NA	no	21	10	NA	NA	-14853	0	0	NA	NA	NA	NA
TCGA-OL-A5DA-01A	4e509f73-99c7-48eb-a3a4-d34e3bface33	a5da	alive	0	1783	NA	NA	NA	61	NA	NA	NA	NA	right upper outer quadrant	sentinel node biopsy alone	NA	NA	nationwide children's hospital	NA	NA	NA	tcga-ol-a5da-f55440	23a668b0-a47f-47d6-bcdf-8e2a5c754314	canonical	NA	positive	NA	NA	NA	NA	positive	other	NA	NA	NA	NA	NA	NA	21	10	NA	NA	-22411	0	0	NA	NA	NA	NA
TCGA-OL-A5RV-01A	1d38d356-d126-4476-94d0-26616b9375b1	a5rv	alive	0	1062	NA	NA	NA	43	NA	NA	NA	NA	right upper outer quadrant	axillary lymph node dissection alone	NA	NA	nationwide children's hospital	NA	NA	NA	tcga-ol-a5rv-f56564	aa52f64a-01a5-47bb-a85f-26b25b7baed7	canonical	NA	positive	NA	NA	NA	NA	positive	modified radical mastectomy	NA	NA	NA	NA	NA	no	21	14	NA	NA	-15820	0	0	NA	NA	NA	NA
TCGA-OL-A5RW-01A	a82d0a57-4383-473d-b334-d13b278404b1	a5rw	alive	0	1106	NA	NA	NA	40	NA	NA	NA	NA	right upper outer quadrant	sentinel lymph node biopsy plus axillary dissection	NA	NA	nationwide children's hospital	NA	NA	NA	tcga-ol-a5rw-f56568	51fa5005-5700-4bb5-8303-4369c6d86e8d	canonical	NA	negative	NA	NA	NA	NA	negative	lumpectomy	NA	NA	NA	NA	NA	NA	21	14	NA	NA	-14638	0	0	NA	NA	NA	NA
TCGA-OL-A5RX-01A	43c0bec6-6fac-47b1-83cb-200a15a932be	a5rx	alive	0	878	NA	NA	NA	51	NA	NA	NA	NA	right upper outer quadrant	sentinel node biopsy alone	NA	NA	nationwide children's hospital	NA	NA	NA	tcga-ol-a5rx-f56570	135bba94-947f-4e8d-88e1-06ffe7c587ec	canonical	NA	positive	NA	NA	NA	NA	positive	simple mastectomy	NA	NA	NA	NA	NA	NA	21	14	NA	NA	-18942	0	0	NA	NA	NA	NA
TCGA-OL-A5RY-01A	8360cec6-daf6-41c9-9a4f-7fc03c958dcc	a5ry	alive	0	752	NA	NA	NA	52	NA	NA	NA	NA	right	sentinel node biopsy alone	NA	NA	nationwide children's hospital	NA	NA	NA	tcga-ol-a5ry-f56565	ec19b71a-1285-42ef-836d-0aea3910712b	canonical	negative	positive	NA	NA	NA	mastectomy nos	negative	lumpectomy	NA	NA	NA	NA	NA	NA	21	14	NA	NA	-19216	0	0	NA	NA	NA	NA
[truncated: 36 more rows]
[truncated: 82 more columns]
